# Supplementary material for: Sequencing analysis reveals evidence of immune activation in advanced HER2 negative breast cancer responders treated with entinostat + nivolumab + ipilimumab
Source: Research Square preprint supplement (doi:10.21203/rs.3.rs-6580687/v1), 2025-06-09
Supplement: Supplementary file 1 [file 3b0a553c017f3b1127e82ffc.xlsx]

## Sheet: Suppelementary_table_diversity_
Supplementary Table 23. TCR repertoire diversity calculated by chaos1 method and the number of strong binding neoantigens per sample
Sample	patientID	Time	RECIST	Subtype	chaos1 diversity	the number of strong binders
R-10_Baseline	R-10	Baseline	Non-responder	HR+	207.989	326
R-10_C1D1	R-10	C1D1	Non-responder	HR+	440.046	74
R-10_Week_8	R-10	Week_8	Non-responder	HR+	2526.11	1
R-12_Baseline	R-12	Baseline	Non-responder	HR+	408.557	29
R-12_C1D1	R-12	C1D1	Non-responder	HR+	267.308	44
R-13_C1D1	R-13	C1D1	Non-responder	HR+	428.887	666
R-13_Week_8	R-13	Week_8	Non-responder	HR+	222.796	14
R-14_Baseline	R-14	Baseline	Responder	TNBC	2684.87	21
R-14_C1D1	R-14	C1D1	Responder	TNBC	1434.47	17
R-15_Baseline	R-15	Baseline	Non-responder	TNBC	63.743	11
R-16_C1D1	R-16	C1D1	Responder	TNBC	2760.36	15
R-16_Week_8	R-16	Week_8	Responder	TNBC	2621.09	1
R-17_Baseline	R-17	Baseline	Non-responder	TNBC	332.059	36
R-17_C1D1	R-17	C1D1	Non-responder	TNBC	1092.02	33
R-18_Baseline	R-18	Baseline	Responder	HR+	500.434	21
R-18_C1D1	R-18	C1D1	Responder	HR+	222.501	18
R-19_C1D1	R-19	C1D1	Non-responder	HR+	382.896	55
R-2_Baseline	R-2	Baseline	Responder	TNBC	3516.3	26
R-2_C1D1	R-2	C1D1	Responder	TNBC	3900.18	27
R-2_Week_8	R-2	Week_8	Responder	TNBC	10498.7	4
R-20_Baseline	R-20	Baseline	Non-responder	HR+	528.797	16
R-20_C1D1	R-20	C1D1	Non-responder	HR+	449.563	15
R-23_Week_8	R-23	Week_8	Non-responder	HR+	200.733	37
R-24_Baseline	R-24	Baseline	Non-responder	HR+	1068.44	28
R-24_C1D1	R-24	C1D1	Non-responder	HR+	1639.38	28
R-4_Baseline	R-4	Baseline	Non-responder	HR+	793.748	30
R-4_Week_8	R-4	Week_8	Non-responder	HR+	3410.72	17
R-5_Baseline	R-5	Baseline	Responder	TNBC	865.559	19
R-5_C1D1	R-5	C1D1	Responder	TNBC	257.499	32
R-6_Baseline	R-6	Baseline	Non-responder	TNBC	377.105	25
R-6_C1D1	R-6	C1D1	Non-responder	TNBC	516.757	29
R-6_Week_8	R-6	Week_8	Non-responder	TNBC	826.694	40
R-7_C1D1	R-7	C1D1	Non-responder	TNBC	1073.26	11
R-8_Baseline	R-8	Baseline	Non-responder	TNBC	1289.86	21
R-8_C1D1	R-8	C1D1	Non-responder	TNBC	1407.09	24
R-9_Baseline	R-9	Baseline	Non-responder	HR+	646.222	21
R-9_C1D1	R-9	C1D1	Non-responder	HR+	148.448	35
