# Supplementary material for: Sequencing analysis reveals evidence of immune activation in advanced HER2 negative breast cancer responders treated with entinostat + nivolumab + ipilimumab
Source: Research Square preprint supplement (doi:10.21203/rs.3.rs-6580687/v1), 2025-06-09
Supplement: Supplementary file 2 [file 455cdd44e26c6fcc16f7d49f.xlsx]

## Sheet: B_vs_C1D1_DEgenes
Supplementary Table 4. The results of DE analysis for paired samples between baseline and C1D1 performed by DESeq2.
Gene	baseMean	log2FoldChange	lfcSE	pvalue	padj
A1BG	4121.15	0.000830713	0.0224685	0.780426	0.999997
A1BG-AS1	320.192	0.00124158	0.0223349	0.754396	0.999997
A1CF	2029.53	3.85934e-05	0.0226501	0.854465	0.999997
A2M	45788.4	-0.000663567	0.0224377	0.829547	0.999997
A2M-AS1	32.3135	-0.00100877	0.0226137	0.556043	0.999461
A2ML1	395.882	0.00300836	0.0228995	0.0354317	0.708192
A3GALT2	20.3826	-0.00134686	0.0226651	0.301802	0.969363
A4GALT	1230.33	0.00364319	0.0229395	0.145927	0.911564
AAAS	1550.82	-0.0079679	0.0235808	0.224828	0.945941
AACS	2495.86	0.00110636	0.0223427	0.774972	0.999997
AADAC	1407.05	0.000104795	0.0226479	0.709088	0.999997
AADACL2	49.3531	7.06892e-05	0.0226516	0.673924	0.999997
AADAT	880.869	-0.00902772	0.0249231	0.0399682	0.724791
AAED1	770.016	-0.00752501	0.0239782	0.111292	0.878691
AAGAB	2029.13	-0.000712841	0.0217021	0.736132	0.999997
AAK1	5310.68	0.00967828	0.0244856	0.1544	0.912482
AAMDC	334.129	-0.00251535	0.0222995	0.59967	0.999997
AAMP	3060.55	-0.00111933	0.0218236	0.849627	0.999997
AANAT	3.15787	-0.000874534	0.0226607	0.289417	0.967559
AAR2	1063.21	0.00864347	0.0239248	0.192707	0.929538
AARD	6228.22	0.00248684	0.0227297	0.277018	0.961965
AARS	9532.2	0.00369063	0.0225149	0.451354	0.994513
AARS2	1945.67	-0.00200289	0.022086	0.691587	0.999997
AARSD1	5.16015	-9.6905e-05	0.0226319	0.914076	0.999997
AASDH	2095.62	-0.0219774	0.0386615	0.0155528	0.546727
AASDHPPT	1186.41	-0.0029204	0.022124	0.608467	0.999997
AASS	1850.12	-0.00712748	0.0241403	0.0175817	0.575308
AATF	2444.95	-0.00284235	0.0217693	0.641728	0.999997
AATK	621.905	0.00487104	0.0232894	0.051626	0.77408
AATK-AS1	2.42211	0.000130349	0.0226507	0.66827	0.999997
ABAT	2084	0.00384919	0.0225135	0.544393	0.999461
ABCA1	11488.5	-0.00228376	0.0225376	0.509463	0.999132
ABCA10	1316.67	-0.00103777	0.0226454	0.409541	0.988558
ABCA11P	390.043	-0.00416459	0.0227321	0.354214	0.980638
ABCA12	3070.18	0.00210525	0.0227533	0.110575	0.877424
ABCA13	349.353	0.00308446	0.0228909	0.0796908	0.829023
ABCA2	13457.6	-0.00163763	0.0221861	0.732108	0.999997
ABCA3	9348.59	0.00502716	0.0231527	0.17726	0.925859
ABCA4	500.247	0.00170638	0.0224997	0.593999	0.999997
ABCA5	4075.16	-0.00116097	0.0224322	0.727335	0.999997
ABCA6	4144.95	-0.00129724	0.022657	0.355558	0.980638
ABCA7	5429.92	0.0163924	0.0315988	0.00593228	0.387465
ABCA8	2559.17	0.000328985	0.0226294	0.742083	0.999997
ABCA9	1976.19	-0.0010708	0.0226442	0.41808	0.988558
ABCB1	1229.37	-0.00216373	0.0226146	0.444983	0.991784
ABCB10	2104.16	-0.00563834	0.0227167	0.357463	0.980638
ABCB11	1571.31	-0.00028933	0.0226413	0.663994	0.999997
ABCB4	2668.58	0.000579852	0.022553	0.786746	0.999997
ABCB5	64.3534	0.00194984	0.0227612	0.0094238	0.46542
ABCB6	1693.84	-0.00316576	0.0224689	0.606219	0.999997
ABCB7	2600.36	-0.00540909	0.0217872	0.499643	0.997423
ABCB8	2075.07	-0.00617108	0.0228549	0.328419	0.979347
ABCB9	1000.34	0.00482399	0.0231248	0.170105	0.92074
ABCC1	6826.28	-0.00428304	0.0226683	0.380063	0.986195
ABCC10	6299.8	-0.00389626	0.0219613	0.489329	0.997044
ABCC11	2212.17	0.00345784	0.0229931	0.0180499	0.578013
ABCC12	168.607	0.00117233	0.0226753	0.185392	0.92765
ABCC13	4.93778	-0.000100764	0.0226486	0.811478	0.999997
ABCC2	2641.79	-0.00021685	0.0225206	0.924622	0.999997
ABCC3	6611.13	-0.00103081	0.0223451	0.785158	0.999997
ABCC4	1684.86	-0.00304104	0.0227887	0.25008	0.953553
ABCC5	8962.11	-0.0097167	0.0252953	0.0384115	0.712992
ABCC6	1848.19	0.000245399	0.0225101	0.92058	0.999997
ABCC6P1	251.86	0.00153308	0.0225884	0.53376	0.999461
ABCC6P2	34.087	7.67592e-05	0.0225781	0.965161	0.999997
ABCC8	524.149	0.00287829	0.0228827	0.027683	0.661564
ABCC9	3239.79	-0.000642524	0.0224401	0.834719	0.999997
ABCD1	4049.61	-0.000775836	0.0221027	0.837631	0.999997
ABCD2	282.586	0.0017863	0.0226881	0.284557	0.964516
ABCD3	5703.95	-0.00132916	0.0220329	0.800784	0.999997
ABCD4	1982.53	-0.00572029	0.0226482	0.371899	0.984284
ABCE1	6392.49	-0.00490874	0.0225566	0.398554	0.988558
ABCF1	4114.62	0.00571632	0.0222874	0.431338	0.990497
ABCF2	2680.89	0.00575665	0.0219916	0.464821	0.995977
ABCF3	3606.38	0.000343576	0.0214997	0.99297	0.999997
ABCG1	3112.61	0.00641493	0.0234622	0.173543	0.921626
ABCG2	443.099	-0.00287295	0.0226377	0.408077	0.988558
ABCG4	34.6384	0.00310362	0.0228721	0.129077	0.897707
ABCG5	692.728	-0.000366994	0.0226083	0.79693	0.999997
ABCG8	1032.82	0.000221852	0.0226336	0.798251	0.999997
ABHD1	122.338	0.00527125	0.0234339	0.0321576	0.689477
ABHD10	710.144	0.00122545	0.021738	0.844498	0.999997
ABHD11	1961.55	0.00668567	0.0237018	0.112701	0.883838
ABHD12	3012.07	0.0132558	0.0275564	0.0412195	0.731564
ABHD12B	60.5636	0.00110915	0.0226841	0.0311776	0.685983
ABHD13	913.181	-0.00228643	0.0218265	0.716157	0.999997
ABHD14A	474.413	-0.000452136	0.0225014	0.859414	0.999997
ABHD14B	1355.68	0.00262654	0.0216028	0.708457	0.999997
ABHD15	579.31	-0.00170124	0.0222277	0.718333	0.999997
ABHD16A	2588.65	-0.0033476	0.022021	0.614241	0.999997
ABHD16B	16.7264	0.00107197	0.0226285	0.50385	0.997423
ABHD17A	1608.8	0.00643915	0.0232407	0.260912	0.957046
ABHD17B	654.44	-0.00553601	0.0220653	0.465214	0.996297
ABHD17C	786.056	-0.00141803	0.0225095	0.632102	0.999997
ABHD2	8890.54	0.0312705	0.0584551	0.012565	0.525783
ABHD3	1360.29	-0.0138927	0.0267424	0.107892	0.871952
ABHD4	1016.04	-0.00144916	0.0220605	0.77989	0.999997
ABHD5	1442.1	0.00737306	0.0238753	0.126719	0.895261
ABHD6	515.779	0.00455538	0.0229083	0.279203	0.9637
ABHD8	815.688	0.233244	0.0637092	9.42159e-06	0.0120934
ABI1	7492.02	-0.00346856	0.0218123	0.61339	0.999997
ABI2	3212.73	0.00317694	0.0210955	0.677203	0.999997
ABI3	1186.16	-0.00309407	0.0225536	0.455246	0.994513
ABI3BP	3002.36	-0.000891842	0.0226267	0.521575	0.999461
ABL1	31835	0.00625118	0.0218501	0.457785	0.99509
ABL2	7243.59	-0.00541012	0.0222722	0.442812	0.991048
ABLIM1	2523.02	0.00485875	0.0230866	0.188366	0.928968
ABLIM2	594.087	0.00101328	0.0225901	0.611465	0.999997
ABLIM3	2208.26	0.00346489	0.0226694	0.383672	0.986195
ABO	436.648	-0.00041636	0.0226067	0.763514	0.999997
ABR	7471.76	0.00352598	0.0216082	0.633028	0.999997
ABRA	3.07091	0.000398122	0.0226545	0.282401	0.964516
ABRACL	2165.25	0.00104831	0.0222902	0.799428	0.999997
ABT1	1002.73	0.0056888	0.0211995	0.553021	0.999461
ABTB1	1692.45	-0.000154306	0.0222967	0.967241	0.999997
ABTB2	1395.25	-0.00221761	0.0225291	0.54264	0.999461
ACAA1	2709.39	-0.00701704	0.0234844	0.206678	0.938684
ACAA2	3308.06	0.00762524	0.0234834	0.232216	0.950292
ACACA	12450.8	0.00196204	0.0219802	0.731409	0.999997
ACACB	7117.89	-0.000405298	0.0224935	0.87501	0.999997
ACAD10	2861.09	-0.00563211	0.0226516	0.377081	0.986195
ACAD11	68.5069	-0.000998203	0.0225056	0.718886	0.999997
ACAD8	1205.47	-0.00153629	0.022157	0.752276	0.999997
ACAD9	4117.52	-0.00457047	0.0220895	0.432896	0.990497
ACADL	197.317	-0.000135406	0.0226303	0.872763	0.999997
ACADM	3285.07	0.00215986	0.0217386	0.739876	0.999997
ACADS	869.547	0.0094808	0.024846	0.0910101	0.843156
ACADSB	4032.19	0.00348621	0.022702	0.362541	0.982498
ACADVL	14400.7	0.00583871	0.0220926	0.450855	0.994039
ACAN	1504.57	-0.00191514	0.0227045	0.244171	0.952301
ACAP1	799.63	0.00399749	0.0229738	0.232347	0.950292
ACAP2	4228.07	-0.0190721	0.0274796	0.108856	0.875646
ACAP3	5378.75	0.000857377	0.0221024	0.862008	0.999997
ACAT1	4967.19	-0.00490629	0.0227481	0.352025	0.980638
ACAT2	1447.69	0.00550516	0.022931	0.289775	0.967951
ACBD3	6066.3	-0.00285634	0.02168	0.678964	0.999997
ACBD4	1094.24	0.00429118	0.0225918	0.408689	0.988558
ACBD5	3072.11	-0.00015469	0.0212899	0.982341	0.999997
ACBD6	1995.9	-0.000145035	0.0218296	0.979154	0.999997
ACBD7	141.797	-0.00210105	0.0226406	0.41302	0.988558
ACCS	939.022	-0.006594	0.0236872	0.1069	0.869872
ACCSL	2.00632	0.000226736	0.0226487	0.579254	0.999997
ACD	880.625	-0.00226088	0.0220105	0.692731	0.999997
ACE	4381.3	0.00537696	0.0233003	0.133365	0.899635
ACE2	126	0.00349199	0.023016	0.00570297	0.384222
ACER1	19.1731	0.000176654	0.0226435	0.744462	0.999997
ACER2	338.113	-0.00302627	0.0227123	0.331847	0.979921
ACER3	967.753	-0.0134148	0.0273555	0.0586263	0.792611
ACHE	215.637	0.00552502	0.0235777	0.0050806	0.374989
ACIN1	13551.7	-0.00672718	0.023026	0.298127	0.969363
ACKR1	458.145	0.000298196	0.0226367	0.701285	0.999997
ACKR2	706.771	0.00455604	0.0232325	0.0321954	0.689477
ACKR3	993.221	-0.0032454	0.0228123	0.245481	0.952301
ACKR4	159.622	-0.00150178	0.0226512	0.390517	0.987157
ACLY	15293.3	-7.73147e-05	0.0221952	0.984565	0.999997
ACMSD	444.425	-2.33368e-05	0.0226096	0.998866	0.999997
ACN9	406.512	-0.000264549	0.0223403	0.941356	0.999997
ACO1	3455.22	-0.0034325	0.0227756	0.301493	0.969363
ACO2	9103.7	0.0036047	0.0222627	0.528886	0.999461
ACOT1	300.128	0.00964349	0.0248679	0.0957789	0.851146
ACOT11	904.32	0.000643702	0.0224648	0.826574	0.999997
ACOT12	391.431	-0.00150233	0.0226825	0.260422	0.957046
ACOT13	824.612	0.00206665	0.0224164	0.60468	0.999997
ACOT2	1322.62	0.00344307	0.022302	0.529625	0.999461
ACOT4	287.16	0.00277704	0.0226425	0.363904	0.983461
ACOT6	3.04132	9.71697e-05	0.0226456	0.828683	0.999997
ACOT7	1277.77	0.0078608	0.0234846	0.238622	0.952012
ACOT8	811.442	0.011041	0.0244024	0.195323	0.929538
ACOT9	1522.57	-0.00251429	0.0221272	0.645298	0.999997
ACOX1	4758.76	0.00516811	0.0224788	0.416585	0.988558
ACOX2	1655.52	-0.00432621	0.0230696	0.136267	0.90311
ACOX3	1816.51	-0.00393057	0.0227891	0.316604	0.974939
ACOXL	242.501	0.000642979	0.0225939	0.710084	0.999997
ACP1	1735.7	-0.00505179	0.0223885	0.426057	0.988558
ACP2	2487.02	0.0104582	0.0249707	0.129478	0.898061
ACP5	2715.91	-0.00302794	0.0227647	0.281521	0.964516
ACP6	785.097	0.000393333	0.0218165	0.947125	0.999997
ACPP	156.682	0.00395959	0.0231074	0.0145261	0.539118
ACPT	2.27022	0.00017792	0.022645	0.740008	0.999997
ACR	61.8518	-0.000512723	0.0224591	0.861873	0.999997
ACRBP	220.292	-0.000881717	0.022493	0.751854	0.999997
ACRC	625.495	-0.269409	0.180061	0.00237799	0.262527
ACRV1	18.0776	-0.00119642	0.022678	0.193426	0.929538
ACSBG1	16.1798	0.00227929	0.0228017	0.013918	0.539118
ACSBG2	3.40981	0.000505556	0.0226537	0.328961	0.979348
ACSF2	1670.67	0.00356761	0.0228656	0.225859	0.947261
ACSF3	2077.69	-0.00438993	0.0223004	0.473454	0.996722
ACSL1	10141	0.00333386	0.0226545	0.393108	0.988506
ACSL3	10697.3	0.00148065	0.0218658	0.802518	0.999997
ACSL4	4598.27	0.000694889	0.0224183	0.831897	0.999997
ACSL5	2566.97	0.000391038	0.0225219	0.871208	0.999997
ACSL6	367.653	0.00399741	0.0231027	0.026525	0.654324
ACSM1	62.7325	0.00204968	0.0226735	0.36098	0.981824
ACSM2A	2400.61	-0.000150493	0.022651	0.637588	0.999997
ACSM2B	2330.55	-0.000111378	0.0226505	0.67927	0.999997
ACSM3	741.992	0.00215219	0.0226507	0.39877	0.988558
ACSM5	1469.19	-0.00292258	0.0228428	0.129477	0.898061
ACSM6	3.09422	-0.000214976	0.022649	0.642316	0.999997
ACSS1	2231.45	0.00865936	0.0245232	0.0844702	0.835627
ACSS2	1692.72	0.00648068	0.0236193	0.12085	0.889017
ACSS3	1813.5	0.00125854	0.0223759	0.737034	0.999997
ACTA1	1016.46	0.00612687	0.0237046	0.0339303	0.701122
ACTA2	24931.3	0.0004594	0.0224997	0.863255	0.999997
ACTA2-AS1	21.7663	0.000708902	0.0226026	0.678108	0.999997
ACTB	205285	0.00860825	0.0243602	0.11371	0.884111
ACTBL2	11.5257	0.000641495	0.0226482	0.444875	0.991684
ACTC1	301.746	0.858769	0.692992	0.000968021	0.166594
ACTG1	107740	0.0269371	0.0438932	0.0278065	0.662126
ACTG2	14213.1	0.000790702	0.0226137	0.601835	0.999997
ACTL10	135.704	0.00296142	0.0227244	0.421548	0.988558
ACTL6A	3166.42	-0.00399796	0.0221239	0.531586	0.999461
ACTL6B	21.3083	8.44356e-05	0.0226512	0.640781	0.999997
ACTL7B	3.46115	0.000301896	0.0226481	0.520051	0.999461
ACTL8	112.035	0.00167247	0.0227006	0.215197	0.942957
ACTN1	38704.3	-0.000623215	0.0222371	0.881486	0.999997
ACTN2	466.522	-0.00496557	0.0232912	0.0701752	0.813239
ACTN3	38.892	0.0011866	0.0226726	0.21757	0.94307
ACTN4	85364.8	0.00585999	0.0231788	0.235588	0.951145
ACTR10	2578.94	0.00193073	0.0219154	0.744534	0.999997
ACTR1A	2444.65	0.00826536	0.0231507	0.265855	0.957539
ACTR1B	2737.42	0.00413144	0.0217973	0.531197	0.999461
ACTR2	14846.5	0.00233546	0.0216692	0.729543	0.999997
ACTR3	13242.9	-0.00902107	0.0232118	0.249277	0.953553
ACTR3B	1214.21	-0.00815123	0.0231919	0.249947	0.953553
ACTR3C	909.49	-0.0100367	0.0251355	0.0855051	0.835986
ACTR5	649.994	-0.00286773	0.0224084	0.533943	0.999461
ACTR6	1790.31	-0.0022196	0.0222663	0.641072	0.999997
ACTR8	2038.09	0.00561513	0.0209886	0.506347	0.997636
ACTRT3	128.7	0.000464857	0.0223493	0.925304	0.999997
ACVR1	2195.03	-0.00102809	0.0218388	0.869544	0.999997
ACVR1B	1439.91	0.0274331	0.0481486	0.0183934	0.581209
ACVR1C	68.6268	0.00223114	0.02273	0.238929	0.952012
ACVR2A	1729.46	-0.00178375	0.0224783	0.685977	0.999997
ACVR2B	1036.7	0.00636572	0.0228329	0.333623	0.980335
ACVRL1	1547.16	0.00250843	0.0225783	0.466699	0.996722
ACY1	9.47856	0.000357552	0.0226017	0.817081	0.999997
ACY3	91.1664	0.00331018	0.0229099	0.116587	0.888036
ACYP1	597.098	-0.0015638	0.0224065	0.673056	0.999997
ACYP2	220.928	-0.00366349	0.0227537	0.332308	0.979921
ADA	903.643	0.00945927	0.024888	0.0824141	0.835079
ADAD1	1.99424	-9.59136e-06	0.0226507	0.982396	0.999997
ADAD2	11.0278	-0.00362217	0.0230469	0.00581655	0.384222
ADAL	626.226	0.00339712	0.0224952	0.388846	0.986229
ADAM10	10334.5	-0.00379264	0.0215836	0.614558	0.999997
ADAM11	116.85	-0.00225145	0.0227192	0.270697	0.958823
ADAM12	3466.99	-0.00614618	0.0236601	0.0560671	0.784394
ADAM15	13566.1	0.00406882	0.0226423	0.393639	0.988558
ADAM17	5985	-0.0918471	0.0395299	0.000991722	0.166693
ADAM18	1.92886	0.000108733	0.0226496	0.758309	0.999997
ADAM19	2758.36	-0.00366682	0.0228296	0.270382	0.958471
ADAM1A	471.048	-0.00267229	0.0226221	0.43565	0.990541
ADAM2	16.7405	0.000469773	0.0226522	0.327659	0.979347
ADAM20	387.962	-0.00191246	0.0226356	0.434476	0.990497
ADAM20P1	68.6939	-0.000480593	0.0225909	0.773095	0.999997
ADAM21	30.8102	0.00574372	0.0236556	0.00566744	0.384222
ADAM21P1	3.94611	0.000307377	0.0226394	0.691436	0.999997
ADAM22	452.832	0.00557784	0.0234643	0.0733928	0.821879
ADAM23	172.935	-0.00203372	0.0226957	0.284387	0.964516
ADAM28	1757.48	0.00206089	0.0226566	0.385916	0.986195
ADAM29	2.60867	0.000226409	0.0226502	0.548478	0.999461
ADAM32	546.841	-0.00798308	0.0239122	0.163474	0.916501
ADAM33	417.733	0.00494792	0.0233896	0.0054503	0.381178
ADAM8	2155.78	-0.00481184	0.0232233	0.0915725	0.84463
ADAM9	18479.1	-0.00190812	0.0223544	0.646982	0.999997
ADAMDEC1	1580.71	0.00268217	0.0228178	0.114015	0.884111
ADAMTS1	2515.22	-0.00331514	0.0227631	0.305936	0.970552
ADAMTS10	2184.57	-0.00171787	0.0226187	0.458531	0.995397
ADAMTS12	3561.01	-0.000677309	0.0225041	0.793467	0.999997
ADAMTS13	1347.94	0.00199616	0.022564	0.512782	0.999442
ADAMTS14	1927.52	-0.00523651	0.023433	0.0247222	0.636001
ADAMTS15	643.218	0.00116068	0.0225602	0.628511	0.999997
ADAMTS16	1133.94	-0.00462986	0.0232778	0.0137587	0.539118
ADAMTS17	569.257	-0.000425899	0.0225936	0.786361	0.999997
ADAMTS18	277.896	-0.00201455	0.0227293	0.177815	0.925859
ADAMTS19	248.673	-0.000881784	0.0226387	0.482186	0.997044
ADAMTS2	6860.52	-0.00272642	0.0227488	0.270268	0.958471
ADAMTS20	83.0298	-0.00185553	0.0227266	0.142255	0.907805
ADAMTS3	197.915	0.000394912	0.0224352	0.899107	0.999997
ADAMTS4	1552.89	0.000259366	0.022437	0.868849	0.999997
ADAMTS5	1394.81	-0.00296886	0.0228663	0.0901219	0.842267
ADAMTS6	985.837	-0.00479072	0.0232362	0.0771181	0.827413
ADAMTS7	1626.87	-0.0041281	0.0230016	0.166084	0.917935
ADAMTS7P1	36.6051	-0.0033958	0.0229382	0.0690901	0.812083
ADAMTS8	134.019	0.00124068	0.0226661	0.296454	0.969363
ADAMTS9	3633.91	-0.00124842	0.0223268	0.753359	0.999997
ADAMTSL1	801.371	-0.00083994	0.0226024	0.618683	0.999997
ADAMTSL2	1423.19	-0.000714269	0.0225831	0.316827	0.974939
ADAMTSL3	1333.42	-0.000152142	0.0224891	0.952385	0.999997
ADAMTSL4	4327.55	0.00573509	0.0235462	0.0473706	0.759006
ADAMTSL5	182.981	0.00355356	0.0229494	0.114129	0.884111
ADAP1	923.552	-0.00179104	0.0225404	0.55362	0.999461
ADAP2	1639.93	-0.00257634	0.0225885	0.462285	0.995808
ADAR	32732.3	0.0107522	0.0259579	0.0319647	0.689477
ADARB1	2802.23	-0.00875115	0.024705	0.0740309	0.821879
ADARB2	37.62	-0.000661759	0.0226077	0.670875	0.999997
ADARB2-AS1	1.9268	5.95078e-05	0.0226509	0.786001	0.999997
ADAT1	1358.13	-0.00470049	0.0223356	0.438758	0.990717
ADAT2	283.884	-0.00168668	0.0224717	0.625319	0.999997
ADAT3	380.131	0.00276995	0.0222737	0.587335	0.999997
ADCK1	446.752	-0.00741155	0.0238869	0.126804	0.895261
ADCK2	1940.72	0.00308596	0.0221125	0.598252	0.999997
ADCK3	2897.92	0.00354311	0.0221516	0.556819	0.999461
ADCK4	1592.1	0.00786324	0.0236996	0.200366	0.933112
ADCK5	1038.63	-0.00625378	0.02352	0.134834	0.900939
ADCY1	2670.71	0.00621134	0.0233736	0.189219	0.928968
ADCY10	112.282	-0.0010114	0.0225119	0.708024	0.999997
ADCY10P1	57.4559	-0.00315219	0.0228258	0.221356	0.944405
ADCY2	599.904	-0.0022657	0.0227433	0.201917	0.934278
ADCY3	5838.02	0.00889115	0.0236161	0.239273	0.95206
ADCY4	1404.7	-0.00119701	0.0225114	0.669329	0.999997
ADCY5	1372.28	0.0031096	0.0229112	0.0442092	0.750302
ADCY6	7249.14	0.00116634	0.0222101	0.797495	0.999997
ADCY7	5934.01	-0.0025426	0.0225973	0.44709	0.992656
ADCY8	4.39025	-7.70872e-05	0.0226486	0.895785	0.999997
ADCY9	4140.81	0.0922477	0.10627	0.00717324	0.42217
ADCYAP1	183.729	0.000323976	0.0226098	0.812475	0.999997
ADCYAP1R1	86.6373	0.00400631	0.0231267	0.0100069	0.476607
ADD1	10146.9	0.0014607	0.0213491	0.821403	0.999997
ADD2	787.646	0.000610513	0.0226011	0.703764	0.999997
ADD3	5594.8	0.00368528	0.0227311	0.347336	0.980638
ADD3-AS1	3.40487	0.000601269	0.0226479	0.453411	0.994513
ADGB	35.9469	0.00039269	0.0226375	0.638468	0.999997
ADH1A	5086.66	0.000238175	0.0226504	0.401484	0.988558
ADH1B	20008.1	0.000292971	0.0226476	0.533483	0.999461
ADH1C	4515.5	0.000378261	0.0226432	0.56582	0.999997
ADH4	7711.77	0.000360685	0.0226515	0.384567	0.986195
ADH5	4377.63	0.00819411	0.0231631	0.286005	0.965035
ADH6	1233.11	-0.000167012	0.0226482	0.730321	0.999997
ADHFE1	1093.24	-0.00373866	0.0224277	0.477052	0.997
ADI1	2389.95	-0.0014592	0.0223631	0.707018	0.999997
ADIG	6.72445	-4.90648e-05	0.0226256	0.970459	0.999997
ADIPOQ	122.398	0.00175131	0.0227363	0.0231285	0.624312
ADIPOR1	4499.01	0.00115591	0.0219492	0.835502	0.999997
ADIPOR2	3675.1	-0.000620749	0.0222077	0.886365	0.999997
ADIRF	2.00977	-0.000165518	0.0226464	0.74755	0.999997
ADK	2667.23	0.00489277	0.0217092	0.595657	0.999997
ADM	943.333	0.000850747	0.0225937	0.641436	0.999997
ADM2	366.561	0.00395864	0.0229993	0.157629	0.913346
ADM5	101.919	0.00403266	0.0229918	0.159697	0.913346
ADNP	12983.7	0.00379046	0.0221853	0.534059	0.999461
ADNP2	2994.45	0.00702019	0.0229991	0.305639	0.969918
ADO	730.88	0.00822652	0.0239046	0.178563	0.925859
ADORA1	1280.8	0.00175147	0.0225147	0.581982	0.999997
ADORA2A	6.9063	-0.00042749	0.0226393	0.613486	0.999997
ADORA2A-AS1	33.5251	0.0010631	0.0226693	0.26471	0.957046
ADORA2B	156.647	-3.30015e-06	0.0224454	0.969428	0.999997
ADORA3	404.027	0.000471719	0.0225095	0.852383	0.999997
ADPGK	2003.29	-0.0111493	0.0252565	0.127671	0.895782
ADPGK-AS1	10.0015	-0.00144068	0.0226788	0.279204	0.9637
ADPRH	256.097	0.00149595	0.0223413	0.708236	0.999997
ADPRHL1	271.01	-0.0024216	0.0225273	0.508595	0.998781
ADPRHL2	1009.52	0.00468943	0.0222704	0.472163	0.996722
ADPRM	254.72	-0.000636606	0.0222402	0.861349	0.999997
ADRA1A	1069.91	-0.00073145	0.0226141	0.621821	0.999997
ADRA1B	155.489	-0.00165592	0.022638	0.427113	0.988558
ADRA1D	14.7917	0.000184033	0.0226232	0.86561	0.999997
ADRA2A	574.308	-0.000286166	0.0225727	0.872641	0.999997
ADRA2B	61.5104	-0.0033812	0.0229284	0.103597	0.863398
ADRA2C	347.097	-0.00405516	0.0230753	0.0714613	0.820534
ADRB1	51.2007	0.00142756	0.022649	0.407565	0.988558
ADRB2	358.427	-0.000533088	0.0224728	0.849251	0.999997
ADRB3	3.47489	-0.000298503	0.0226509	0.413651	0.988558
ADRBK1	13609.1	0.00499732	0.0219435	0.504315	0.997423
ADRBK2	3973.78	-0.00102675	0.0224182	0.759532	0.999997
ADRM1	5435.33	0.0111704	0.0246804	0.176674	0.925372
ADSL	2729.12	0.00257851	0.0222415	0.618974	0.999997
ADSS	7572.84	0.00107056	0.0217934	0.8599	0.999997
ADSSL1	684.285	-0.00187144	0.0225518	0.534362	0.999461
ADTRP	68.8498	0.00171869	0.0226861	0.285716	0.965035
AEBP1	51829.1	-0.00134891	0.0226386	0.424094	0.988558
AEBP2	2389.17	-0.00487554	0.022379	0.443755	0.991048
AEN	847.936	-0.00344466	0.0215111	0.662488	0.999997
AES	10492.2	0.00683776	0.0238506	0.0751225	0.823397
AFAP1	2639	-0.00622933	0.0233466	0.199003	0.931291
AFAP1-AS1	172.135	-0.000165288	0.022512	0.945375	0.999997
AFAP1L1	1409.95	-0.00217716	0.0226246	0.431812	0.990497
AFAP1L2	905.748	0.00172465	0.0224228	0.644151	0.999997
AFF1	9942.46	0.00887853	0.024257	0.149934	0.912279
AFF2	272.211	-0.00141065	0.022599	0.525574	0.999461
AFF3	8038.14	6.69392e-05	0.0223821	0.985385	0.999997
AFF4	10153.1	0.00993163	0.0249593	0.103594	0.863398
AFG3L1P	148.871	-0.00646527	0.0236925	0.0897031	0.842014
AFG3L2	5180.21	-0.00774959	0.0229118	0.292573	0.969363
AFM	3102.69	-9.52823e-05	0.0226506	0.740603	0.999997
AFMID	1148.05	0.000732694	0.0222072	0.868511	0.999997
AFP	23.7056	-0.000945104	0.0226659	0.24648	0.952301
AFTPH	5330.76	0.00404915	0.0226092	0.40664	0.988558
AGA	1034.79	4.985e-05	0.021878	0.993604	0.999997
AGAP1	5162.94	0.00239014	0.0217286	0.733748	0.999997
AGAP11	531.106	-0.00141248	0.0226237	0.470407	0.996722
AGAP2	860.078	0.0124656	0.0276114	0.00542892	0.381178
AGAP2-AS1	538.072	0.0151867	0.0299841	0.0110997	0.500036
AGAP3	6048.4	-0.00344408	0.0203962	0.710925	0.999997
AGAP4	500.745	-0.00140823	0.0224305	0.685128	0.999997
AGAP6	3182.96	-0.00177072	0.0224577	0.616385	0.999997
AGAP7P	140.553	-0.000523808	0.0223008	0.893524	0.999997
AGBL1	20.5132	-0.000767568	0.0226535	0.383129	0.986195
AGBL2	290.256	-0.00176153	0.0223767	0.646262	0.999997
AGBL3	178.5	-0.0033622	0.0228148	0.259514	0.957046
AGBL4	130.575	-0.0061874	0.0235823	0.0969725	0.851146
AGBL5	2022.19	0.00714798	0.0238572	0.109834	0.876967
AGER	440.83	0.00211746	0.0223525	0.626111	0.999997
AGFG1	6768.25	0.00445999	0.0224735	0.437907	0.990717
AGFG2	1543.42	0.00838311	0.0241218	0.145562	0.910422
AGGF1	5450.86	-0.00217001	0.0218674	0.722671	0.999997
AGK	1292.08	-0.00125856	0.021018	0.870608	0.999997
AGL	10659	-0.0113987	0.0266336	0.0117711	0.51221
AGMAT	558.984	0.00189413	0.0225903	0.493533	0.997044
AGMO	392.692	-3.05572e-05	0.0226006	0.980467	0.999997
AGO1	3978.85	0.0167392	0.029221	0.074699	0.823387
AGO2	11100.4	-0.0102931	0.0248777	0.132008	0.899054
AGO3	4700.78	-0.0203635	0.0315034	0.0499917	0.767111
AGO4	3139.3	0.00338371	0.0219569	0.66812	0.999997
AGPAT1	2232.21	0.0123287	0.0269853	0.0343958	0.704903
AGPAT2	2348.19	-0.00159039	0.0224114	0.666276	0.999997
AGPAT3	4647.4	0.0116232	0.0262085	0.0719092	0.82151
AGPAT4	604.366	-0.00204801	0.0226219	0.440339	0.991004
AGPAT4-IT1	82.1122	-0.00122682	0.0226638	0.299793	0.969363
AGPAT5	1983.77	-4.86579e-05	0.0219966	0.991844	0.999997
AGPAT6	8007.69	0.00559581	0.0225732	0.388979	0.986229
AGPAT9	334.812	0.00103565	0.0225045	0.709181	0.999997
AGPS	4288.73	0.00578879	0.0226744	0.366847	0.984284
AGR2	3750.6	0.000507111	0.0226304	0.638818	0.999997
AGR3	1676.22	0.00600905	0.0237697	0.00245488	0.263007
AGRN	21775.4	-0.00137156	0.0223669	0.718755	0.999997
AGRP	2.32392	0.000561259	0.0226543	0.308104	0.972187
AGT	6411.14	0.0069115	0.0241465	0.00156311	0.215022
AGTPBP1	3509.94	-0.00232733	0.0222877	0.623046	0.999997
AGTR1	654.859	0.00228169	0.0227686	0.123162	0.891096
AGTRAP	1194.6	0.00257093	0.0220785	0.650392	0.999997
AGXT	7416.33	9.98101e-05	0.0226508	0.693194	0.999997
AGXT2	755.774	1.47161e-05	0.0226112	0.982874	0.999997
AHCTF1	17173.4	-0.00121899	0.0217918	0.839265	0.999997
AHCTF1P1	868.832	0.00101278	0.0224455	0.752462	0.999997
AHCY	4127.58	0.00724833	0.0235559	0.224232	0.945027
AHCYL1	4456.52	0.106258	0.0914803	0.00572636	0.384222
AHCYL2	1037.42	-0.00269196	0.0220654	0.566747	0.999997
AHDC1	6010.97	0.00187018	0.0216611	0.776871	0.999997
AHI1	6133.03	-0.0145985	0.0294378	0.00955549	0.46763
AHNAK	286218	0.00180134	0.0222485	0.697915	0.999997
AHNAK2	34638.7	-0.000244324	0.0225496	0.902745	0.999997
AHR	9999.31	0.00888355	0.0249974	0.0160449	0.555243
AHRR	193.525	-0.00191209	0.0225545	0.529585	0.999461
AHSA1	3631.73	0.000732624	0.022183	0.872458	0.999997
AHSA2	2398.59	-0.00402599	0.022876	0.262268	0.957046
AHSG	7553.7	-0.000311044	0.0226446	0.669625	0.999997
AICDA	7.57325	-0.000970276	0.0226741	0.149649	0.912279
AIDA	3750.46	-0.00277883	0.0221891	0.606307	0.999997
AIF1	509.415	-0.000918751	0.0225584	0.681547	0.999997
AIF1L	1819.75	0.00021004	0.0224154	0.953747	0.999997
AIFM1	2925.69	0.00212714	0.0222817	0.648296	0.999997
AIFM2	714.885	0.0132298	0.0274718	0.0459748	0.755619
AIFM3	338.097	0.00129948	0.022484	0.674684	0.999997
AIG1	1648.03	0.00632236	0.0231511	0.263734	0.957046
AIM1	10588.8	-0.00185035	0.0219199	0.750988	0.999997
AIM1L	666.929	0.00446365	0.0232075	0.0258026	0.645937
AIM2	584.38	0.00231025	0.022704	0.308831	0.973405
AIMP1	2333.08	-0.00273361	0.0216149	0.696301	0.999997
AIMP2	1160.97	0.00553763	0.0225421	0.563338	0.999997
AIP	1703.23	0.00773214	0.0236264	0.20907	0.940861
AIRE	8.7168	-0.000608481	0.0226383	0.544313	0.999461
AJAP1	82.4366	-0.00131934	0.0226365	0.443223	0.991048
AJUBA	847.039	0.00117289	0.0224584	0.713705	0.999997
AK1	1279.9	0.00520618	0.0227215	0.360802	0.981824
AK2	3444.33	0.0116451	0.0243641	0.202091	0.934278
AK3	1733.7	0.00375314	0.0218906	0.61215	0.999997
AK4	870.29	0.000745287	0.022464	0.802911	0.999997
AK5	196.728	-0.000914789	0.0226181	0.55555	0.999461
AK7	118.133	0.00153581	0.0226381	0.434045	0.990497
AK8	132.713	-0.00364781	0.0228147	0.286008	0.965035
AK9	823.071	0.000657655	0.0221044	0.897957	0.999997
AKAP1	6762.16	0.00424671	0.0225543	0.42131	0.988558
AKAP10	2811.23	0.000781342	0.0212514	0.85445	0.999997
AKAP11	7901.8	-0.00204375	0.0213746	0.779924	0.999997
AKAP12	1787.25	-0.000488529	0.0226049	0.732287	0.999997
AKAP13	17742.8	-0.00647744	0.0226527	0.360884	0.981824
AKAP14	5.63731	-0.000700829	0.0226564	0.294737	0.969363
AKAP17A	5051.77	-0.00591363	0.0231115	0.259152	0.957046
AKAP2	18.9572	-1.13115e-05	0.022557	0.994494	0.999997
AKAP3	182.689	0.00213743	0.0226218	0.441733	0.991048
AKAP5	184.672	-0.00055841	0.022513	0.823334	0.999997
AKAP6	616.84	0.00537993	0.0232902	0.140417	0.904562
AKAP7	453.732	-0.00378114	0.0227802	0.317489	0.974939
AKAP8	2560.12	-0.00824978	0.0238466	0.189181	0.928968
AKAP8L	4946.3	0.00341903	0.0215472	0.529476	0.999461
AKAP9	157710	-0.0162328	0.0305551	0.0245084	0.635645
AKIP1	628.523	-0.00761398	0.0229707	0.337698	0.980638
AKIRIN1	2601.58	0.00538414	0.0230163	0.270604	0.958666
AKIRIN2	1101.81	-0.00166155	0.0216254	0.901409	0.999997
AKNA	5522.34	0.0024005	0.0224862	0.535621	0.999461
AKNAD1	14.4348	0.000825364	0.0226527	0.365617	0.984284
AKR1A1	4107.63	0.0299387	0.0448399	0.0316275	0.686665
AKR1B1	720.215	-0.002784	0.0227228	0.321855	0.976165
AKR1B10	184.908	0.00065065	0.022657	0.206612	0.938684
AKR1B15	199.576	-0.00028548	0.0226201	0.80044	0.999997
AKR1C1	2326.62	0.00204704	0.0227076	0.262834	0.957046
AKR1C2	1581.62	0.000946098	0.0225931	0.620018	0.999997
AKR1C3	1407.41	0.00414887	0.0229769	0.182946	0.926889
AKR1C4	1464.04	-2.20201e-05	0.0226497	0.981784	0.999997
AKR1CL1	131.071	-0.00539367	0.0235449	0.00332651	0.304401
AKR1D1	692.143	-0.000247112	0.0226429	0.702408	0.999997
AKR1E2	884.297	-0.00296663	0.0227388	0.308827	0.973405
AKR7A2	3644.46	0.014799	0.0292999	0.0201326	0.60531
AKR7A3	1632.77	0.00315488	0.0228429	0.188003	0.928968
AKR7L	417.308	-0.000771329	0.0225507	0.729974	0.999997
AKT1	65859.3	-0.000913751	0.0218081	0.876798	0.999997
AKT1S1	1372.63	-0.00796073	0.0235379	0.255939	0.95596
AKT2	34580.3	0.0115102	0.0252437	0.140843	0.904562
AKT3	26109.3	0.000213982	0.0225068	0.934675	0.999997
AKTIP	1415.33	0.00482487	0.0214144	0.57247	0.999997
ALAD	1151.47	0.00454794	0.0219926	0.521559	0.999461
ALAS1	3222.84	0.126634	0.092905	0.00393866	0.325614
ALAS2	90.7337	0.000626475	0.0226524	0.313716	0.97444
ALB	155570	-0.00171371	0.0227296	0.0386071	0.712992
ALCAM	7771.03	0.000620005	0.0225485	0.779421	0.999997
ALDH16A1	1884.7	0.00111343	0.0196806	0.877352	0.999997
ALDH18A1	3992.6	-0.00194621	0.0220151	0.726137	0.999997
ALDH1A1	3873.83	0.00329004	0.0229288	0.0692126	0.812083
ALDH1A2	81.1485	-0.000932962	0.0226305	0.504505	0.997423
ALDH1A3	2062.63	-0.0011185	0.0224032	0.74842	0.999997
ALDH1B1	2471.24	0.00354285	0.0226444	0.39756	0.988558
ALDH1L1	2891.31	0.00198448	0.0227189	0.212697	0.94277
ALDH1L1-AS1	1.83696	-0.000132539	0.0226475	0.78539	0.999997
ALDH1L2	2189.94	-0.00420771	0.0230516	0.129917	0.898061
ALDH2	16450.2	-0.00047007	0.0225049	0.85055	0.999997
ALDH3A1	53.456	0.00149459	0.0227132	0.0175947	0.575308
ALDH3A2	4440.7	0.145646	0.235818	0.00540214	0.381178
ALDH3B1	1287.34	0.00586015	0.0234124	0.137448	0.904463
ALDH3B2	3693.73	0.00306583	0.0228512	0.151833	0.912279
ALDH4A1	2279.19	0.00272642	0.0226082	0.41653	0.988558
ALDH5A1	750.89	-0.00370899	0.0226212	0.406316	0.988558
ALDH6A1	3007.41	0.00461346	0.0230104	0.222581	0.944405
ALDH7A1	5118.05	0.00566387	0.0229009	0.314925	0.97444
ALDH8A1	866.775	-0.00228423	0.0226809	0.350704	0.980638
ALDH9A1	3748.07	0.00681786	0.0232103	0.280991	0.964015
ALDOA	46919.8	0.00117678	0.0224714	0.705874	0.999997
ALDOB	15278.9	-0.000233836	0.0226474	0.596338	0.999997
ALDOC	882.21	0.00748331	0.0243097	0.0149284	0.539118
ALG1	1393.89	0.00059037	0.0214726	0.915316	0.999997
ALG10	1402.43	-0.00986221	0.0244129	0.171729	0.921626
ALG10B	1322.17	-0.00525038	0.022538	0.401965	0.988558
ALG11	699.164	-0.00689397	0.0226421	0.353726	0.980638
ALG12	2917.46	0.000163478	0.0221876	0.971382	0.999997
ALG13	5236.87	-0.0153422	0.0304884	0.00414201	0.334214
ALG14	342.235	-0.00945552	0.0247069	0.107468	0.87137
ALG1L	101.039	0.000102178	0.0223924	0.976411	0.999997
ALG1L2	57.0063	0.000988552	0.0226025	0.597042	0.999997
ALG1L9P	114.263	-0.00196623	0.0225303	0.546825	0.999461
ALG2	1302.79	-0.00310075	0.0217488	0.610656	0.999997
ALG3	1453.11	0.00178923	0.022162	0.707835	0.999997
ALG5	1858.56	-0.00259396	0.0214998	0.71931	0.999997
ALG6	1509.93	-0.00557772	0.022875	0.338385	0.980638
ALG8	2266.47	-0.00157745	0.0221457	0.76642	0.999997
ALG9	1261.43	0.00242988	0.0210025	0.771726	0.999997
ALK	398.691	6.8677e-05	0.0225954	0.964894	0.999997
ALKBH1	498.027	-0.0115226	0.0259901	0.0734335	0.821879
ALKBH2	396.369	0.0046803	0.0221956	0.471346	0.996722
ALKBH3	652.96	0.00205144	0.0224003	0.6141	0.999997
ALKBH4	376.495	-0.000722134	0.0216849	0.917759	0.999997
ALKBH5	4328.19	0.00718785	0.0235142	0.20881	0.940861
ALKBH6	555.432	0.00227028	0.0220113	0.692952	0.999997
ALKBH7	561.076	-0.00161153	0.0222046	0.736687	0.999997
ALKBH8	897.508	-0.00670462	0.0230442	0.324642	0.978344
ALLC	14.4112	-0.000334638	0.0226339	0.743702	0.999997
ALMS1	15066	-0.0278652	0.0467962	0.0666863	0.811258
ALMS1P	86.5961	-0.000510137	0.0225372	0.822594	0.999997
ALOX12	50.9225	0.00173763	0.022732	0.0384455	0.712992
ALOX12B	154.441	0.00036577	0.0226508	0.345515	0.980638
ALOX15	175.142	0.00566233	0.0236191	0.00672039	0.408575
ALOX15B	607.494	0.000696816	0.0225883	0.701333	0.999997
ALOX15P1	51.9252	0.00749144	0.0243744	0.00581812	0.384222
ALOX5	2983.11	0.000557	0.0225086	0.83025	0.999997
ALOX5AP	812.686	-0.000447026	0.0225152	0.853479	0.999997
ALOXE3	90.217	0.00279884	0.0228862	0.00385167	0.324386
ALPI	77.3822	-6.87289e-06	0.0226513	0.999162	0.999997
ALPK1	2531.36	0.00409686	0.0228764	0.269226	0.958191
ALPK2	1416.04	-0.00311024	0.0228849	0.0956799	0.851146
ALPK3	1111.66	-0.000887829	0.0225059	0.739934	0.999997
ALPL	1644.72	0.00914214	0.0252955	0.00228079	0.257742
ALPP	75.7063	0.000504823	0.0226501	0.430991	0.990497
ALPPL2	4.55781	0.000469658	0.0226562	0.225506	0.946608
ALS2	3680.74	-0.0112296	0.0236326	0.268117	0.958191
ALS2CL	1650.51	0.00184925	0.0225311	0.55658	0.999461
ALS2CR11	237.928	0.000304489	0.0225777	0.864714	0.999997
ALS2CR12	187.014	9.72407e-05	0.0224872	0.972331	0.999997
ALX1	15.7403	0.000175468	0.0226481	0.657337	0.999997
ALX3	17.3602	-0.00016902	0.0226113	0.897724	0.999997
ALX4	15.4778	0.000382287	0.0226301	0.708989	0.999997
ALYREF	1483.74	0.000529779	0.0220598	0.916727	0.999997
AMACR	90.0065	-0.00044583	0.0224131	0.890425	0.999997
AMBP	12065.7	-0.000756694	0.0226299	0.546891	0.999461
AMBRA1	4043.65	0.00368683	0.0221399	0.549947	0.999461
AMD1	6666	-0.00222165	0.022277	0.637465	0.999997
AMDHD1	788.063	0.00132455	0.0224595	0.685955	0.999997
AMDHD2	2208.83	0.00246168	0.0223508	0.631109	0.999997
AMER1	1241.9	-0.00470654	0.0227924	0.335592	0.980638
AMER2	11.1128	0.000677073	0.022656	0.307245	0.971406
AMER3	289.906	2.70066e-05	0.0226513	0.870528	0.999997
AMFR	7292.86	0.000852857	0.0219038	0.88026	0.999997
AMH	676.025	0.0019605	0.0225313	0.545543	0.999461
AMHR2	15.6257	0.000466384	0.0226314	0.661271	0.999997
AMICA1	373.831	0.00130771	0.0226432	0.417105	0.988558
AMIGO1	354.671	0.00251075	0.0222266	0.623795	0.999997
AMIGO2	1967.18	0.000971335	0.0224177	0.773755	0.999997
AMIGO3	415.884	0.00036714	0.0222644	0.941824	0.999997
AMMECR1	500.947	-0.00167041	0.0222537	0.711216	0.999997
AMMECR1L	1073.11	-0.0112432	0.024895	0.159084	0.913346
AMN	178.951	0.00107288	0.0225873	0.608603	0.999997
AMN1	375.47	-0.00378305	0.0227307	0.34941	0.980638
AMOT	1821.43	0.00303162	0.0228227	0.196653	0.929557
AMOTL1	5313.67	0.00436694	0.0229715	0.224551	0.945601
AMOTL2	2568.18	0.00472368	0.0228712	0.304085	0.969363
AMPD1	88.3343	0.00353118	0.0230057	0.0240521	0.633848
AMPD2	3639.91	-0.00273728	0.0220699	0.623264	0.999997
AMPD3	1984.53	-0.00145865	0.0224869	0.540735	0.999461
AMPH	248.039	-0.00128952	0.0226052	0.529359	0.999461
AMT	800.716	-0.000591656	0.0223663	0.96138	0.999997
AMTN	2685.53	0.000345578	0.0226519	0.357786	0.980638
AMY1B	7.1659	0.000221967	0.0226385	0.768197	0.999997
AMY2A	29.2161	8.43112e-06	0.022644	0.98892	0.999997
AMY2B	1471.15	-0.00417153	0.0230591	0.114521	0.884111
AMZ1	179.454	-0.000394954	0.0225867	0.814436	0.999997
AMZ2	5475.64	0.00207949	0.0225357	0.529945	0.999461
AMZ2P1	406.373	0.00274396	0.0223292	0.573062	0.999997
ANAPC1	7762.51	-0.0108978	0.024113	0.213351	0.94277
ANAPC10	937.84	-0.0151316	0.0285639	0.0598379	0.794947
ANAPC11	1629.74	0.00313552	0.0222142	0.572569	0.999997
ANAPC13	963.088	0.00165833	0.0223725	0.675975	0.999997
ANAPC15	546.662	-0.00505069	0.0228901	0.305633	0.969918
ANAPC16	1124.72	0.00302204	0.0216865	0.665094	0.999997
ANAPC1P1	149.187	-0.00111995	0.0223039	0.789996	0.999997
ANAPC2	4141.61	-0.00485354	0.0228793	0.313282	0.97444
ANAPC4	2713.11	-0.0120221	0.0260796	0.0883546	0.841352
ANAPC5	6434.15	-0.0119417	0.0245138	0.194726	0.929538
ANAPC7	3092.82	-0.00534642	0.0225706	0.371473	0.984284
ANG	1746.06	0.00305258	0.0228193	0.20661	0.938684
ANGEL1	1206.36	-0.00459535	0.0225824	0.319999	0.97565
ANGEL2	2414.38	-0.00605258	0.021679	0.492581	0.997044
ANGPT1	676.617	-0.00212068	0.0226469	0.402054	0.988558
ANGPT2	747.913	-0.00157064	0.0226087	0.48858	0.997044
ANGPT4	6.15559	0.000873756	0.0226596	0.291104	0.968705
ANGPTL1	239.3	0.00011128	0.0226122	0.932382	0.999997
ANGPTL2	2714.41	0.00175627	0.0226473	0.401533	0.988558
ANGPTL3	3450.38	-7.42784e-05	0.0226509	0.80344	0.999997
ANGPTL4	1213.84	0.00030797	0.0226079	0.819269	0.999997
ANGPTL5	21.1625	0.000356062	0.0226485	0.449611	0.993193
ANGPTL6	165.507	0.00377872	0.0229877	0.125701	0.894178
ANGPTL7	384.115	0.00017658	0.0226458	0.707814	0.999997
ANK1	501.848	0.00164999	0.0225997	0.500717	0.997423
ANK2	1337.95	0.00153143	0.022652	0.387039	0.986195
ANK3	5804.7	0.217783	0.1201	0.00142936	0.205315
ANKAR	1165.34	-0.00937094	0.0247985	0.090225	0.842267
ANKDD1A	197.303	0.000383534	0.0225696	0.841253	0.999997
ANKDD1B	116.14	-0.00195553	0.0225977	0.480953	0.997044
ANKEF1	937.963	0.00458974	0.0229259	0.271225	0.959635
ANKFN1	148.592	0.000740392	0.0226486	0.399165	0.988558
ANKFY1	3970.35	0.00712338	0.0218297	0.426613	0.988558
ANKH	3404.18	-0.00966774	0.0252024	0.0482893	0.759441
ANKHD1	196.926	-0.00204341	0.0222639	0.670298	0.999997
ANKHD1-EIF4EBP3	33.9516	0.00164492	0.0225984	0.52218	0.999461
ANKIB1	8844.96	0.00290407	0.0219751	0.637846	0.999997
ANKK1	31.9835	0.00120031	0.0226178	0.521878	0.999461
ANKLE1	131.195	0.000254291	0.0224441	0.936763	0.999997
ANKLE2	7652.83	-0.0150726	0.0285232	0.0595904	0.794947
ANKMY1	2152.9	-0.00340733	0.0227759	0.299457	0.969363
ANKMY2	1320.97	0.00375926	0.0215467	0.624586	0.999997
ANKRA2	1045.29	0.00379801	0.0223938	0.497885	0.997336
ANKRD1	92.207	0.0034439	0.0229916	0.0201548	0.60531
ANKRD10	6342.02	-0.00307376	0.02261	0.42272	0.988558
ANKRD11	16464.2	-0.00387692	0.022363	0.487821	0.997044
ANKRD12	12116.5	-0.00493768	0.0223927	0.438745	0.990717
ANKRD13A	2516.3	-0.000945605	0.0210777	0.902271	0.999997
ANKRD13B	1603.49	0.0258424	0.049142	0.00646559	0.399151
ANKRD13C	2383.45	-0.00195378	0.021118	0.80536	0.999997
ANKRD13D	4883.65	-0.00612514	0.0226821	0.326985	0.978803
ANKRD16	610.347	-0.00600424	0.0229985	0.391344	0.987645
ANKRD17	26609.5	0.00585761	0.0229318	0.309504	0.973648
ANKRD18A	1116.69	-0.000606691	0.0225813	0.739901	0.999997
ANKRD18B	360.901	0.00272453	0.0228063	0.161629	0.915932
ANKRD19P	28.3157	-0.00131335	0.0226681	0.302223	0.969363
ANKRD2	12.4145	-0.00078184	0.0226102	0.631206	0.999997
ANKRD20A11P	73.6099	-0.0021394	0.022724	0.236559	0.951529
ANKRD20A5P	579.157	-0.00335544	0.0229335	0.0809623	0.830902
ANKRD20A8P	182.595	0.000199124	0.0225064	0.93809	0.999997
ANKRD22	183.154	0.00296755	0.0228383	0.155721	0.912482
ANKRD23	519.201	-0.000717094	0.0223679	0.840304	0.999997
ANKRD24	300.219	0.00170447	0.0223109	0.692101	0.999997
ANKRD26	6083.77	-0.0229863	0.0417644	0.00836258	0.444863
ANKRD26P1	9.08736	-0.000331366	0.0226353	0.720553	0.999997
ANKRD27	4432.82	-0.00384827	0.0221508	0.535647	0.999461
ANKRD28	5443.27	0.000517519	0.0217187	0.933057	0.999997
ANKRD29	141.9	0.00080965	0.0226178	0.588102	0.999997
ANKRD30A	6310.03	-0.0002002	0.0226411	0.779722	0.999997
ANKRD30B	4063.99	-0.00132646	0.0226611	0.344649	0.980638
ANKRD31	266.593	0.000338229	0.0221789	0.869035	0.999997
ANKRD32	1687.4	-0.0055533	0.0225024	0.24491	0.952301
ANKRD33	3.20215	0.000160419	0.0226448	0.756966	0.999997
ANKRD33B	130.77	0.00141143	0.022619	0.488204	0.997044
ANKRD34A	158.028	0.00839934	0.0246922	0.0254306	0.640207
ANKRD34B	29.0288	8.99491e-05	0.0226231	0.917363	0.999997
ANKRD35	128.243	0.000276214	0.0226269	0.788256	0.999997
ANKRD36	15471.1	-0.00483813	0.0232115	0.106	0.867161
ANKRD36B	8504.2	-0.00478967	0.0232062	0.101141	0.860076
ANKRD36C	16393.4	-0.00255422	0.0227123	0.312776	0.973934
ANKRD37	400.943	-0.00507437	0.0232806	0.0860996	0.835986
ANKRD39	381.692	-0.00132536	0.0222877	0.753065	0.999997
ANKRD40	4766.94	0.00261497	0.0222436	0.608973	0.999997
ANKRD42	806.932	-0.0196208	0.0358252	0.0145051	0.539118
ANKRD44	2934.71	-4.5959e-05	0.0223788	0.987503	0.999997
ANKRD45	32.0388	0.00167252	0.0226728	0.334623	0.980638
ANKRD46	737.467	-0.0022682	0.0220621	0.674404	0.999997
ANKRD49	521.524	-0.00394256	0.0224122	0.460972	0.995808
ANKRD50	7924.56	-0.004384	0.0225537	0.416975	0.988558
ANKRD52	4323.31	0.00186337	0.0217567	0.815582	0.999997
ANKRD53	77.3259	-0.002068	0.0226425	0.45476	0.994513
ANKRD54	686.766	0.00272562	0.02235	0.571259	0.999997
ANKRD55	24.8286	0.00142736	0.0226777	0.272471	0.960248
ANKRD6	1076.63	-0.00223536	0.0226159	0.440963	0.991048
ANKRD61	13.8837	-0.00301297	0.0228719	0.104511	0.865442
ANKRD62	38.8926	-0.00153371	0.0226882	0.235308	0.951145
ANKRD62P1-PARP4P3	11.5691	-7.22892e-05	0.0226388	0.933334	0.999997
ANKRD63	5.19076	-0.000556638	0.0226485	0.478456	0.997044
ANKRD65	139.513	-0.00193211	0.0226206	0.450771	0.994039
ANKRD7	27.4721	-0.000895723	0.0226357	0.491434	0.997044
ANKRD9	775.202	0.00248491	0.0225728	0.472529	0.996722
ANKS1A	4925.62	0.00576892	0.0223625	0.419301	0.988558
ANKS1B	3429.81	-0.00375678	0.0226339	0.399339	0.988558
ANKS3	1311.35	-0.00551523	0.0229439	0.284693	0.964516
ANKS4B	72.1868	-0.000628202	0.0226449	0.559187	0.99954
ANKS6	789.046	-0.00381507	0.02287	0.248917	0.953553
ANKZF1	1743.37	-0.00417741	0.0224043	0.464259	0.995946
ANLN	7123.62	-0.000178639	0.0223126	0.961448	0.999997
ANO1	7260.3	0.00158051	0.022458	0.64507	0.999997
ANO10	2358.99	0.00334293	0.021608	0.6493	0.999997
ANO2	399.774	-0.000549971	0.0225228	0.8194	0.999997
ANO3	110.045	0.00101326	0.0225851	0.625837	0.999997
ANO4	80.7392	0.00135573	0.022662	0.34069	0.980638
ANO5	340.125	-0.00226358	0.022556	0.499949	0.997423
ANO6	7078.8	-0.00580335	0.0229478	0.303327	0.969363
ANO7	1042.64	-0.00431167	0.023017	0.182343	0.926889
ANO8	3546.63	0.00386978	0.0218928	0.575903	0.999997
ANO9	2536.58	-5.94994e-05	0.0223195	0.985958	0.999997
ANP32A	5912.78	0.00109098	0.022065	0.831598	0.999997
ANP32B	6169.62	1.69243e-05	0.0222537	0.99828	0.999997
ANP32C	112.374	0.000113432	0.0225246	0.969797	0.999997
ANP32D	16.4897	0.00270485	0.0228001	0.180577	0.926889
ANP32E	3214.42	0.00285511	0.0224098	0.535681	0.999461
ANPEP	12516	0.00418519	0.0230144	0.164151	0.917137
ANTXR1	8618.31	-0.00362475	0.0229178	0.169237	0.920701
ANTXR2	1141.65	-0.00448669	0.0230447	0.182369	0.926889
ANTXRL	179.616	0.000193343	0.0226218	0.8683	0.999997
ANXA1	8579.22	0.000377275	0.0224338	0.904903	0.999997
ANXA10	165.823	-1.55299e-05	0.0226465	0.992515	0.999997
ANXA11	7591.4	0.0147498	0.0286369	0.044826	0.750302
ANXA13	34.4547	1.00893	0.482353	0.000724247	0.139335
ANXA2	28855.3	0.00278548	0.0222161	0.600737	0.999997
ANXA2P1	160.066	0.00374921	0.0228438	0.274412	0.960248
ANXA2P2	2348.2	0.00473184	0.0230074	0.344	0.980638
ANXA2R	218.356	-0.00435502	0.0228658	0.262699	0.957046
ANXA3	1866.1	0.000650555	0.0225476	0.771853	0.999997
ANXA4	2853.57	0.0173122	0.0307183	0.0473299	0.759006
ANXA5	12875.3	-0.00105731	0.0220728	0.833521	0.999997
ANXA6	8375.99	0.00928538	0.0248642	0.0727183	0.821879
ANXA7	4678.47	0.0136276	0.0237928	0.254112	0.955776
ANXA8	35.0564	-0.000156712	0.0226427	0.816733	0.999997
ANXA8L1	82.4527	0.000834203	0.0226631	0.180208	0.926889
ANXA8L2	159.511	0.000534517	0.0226496	0.377221	0.986195
ANXA9	891.072	0.248157	0.151904	0.00208815	0.253134
AOAH	1212.83	0.00237096	0.0227065	0.309597	0.973648
AOC1	207.864	0.00223293	0.0227533	0.160579	0.913759
AOC2	366.851	-0.00125383	0.0224336	0.710192	0.999997
AOC3	1595.61	-0.000114623	0.0225917	0.937176	0.999997
AOC4P	142.935	-1.25001e-05	0.0226151	0.989485	0.999997
AOX1	14025.8	0.000565114	0.0226335	0.594129	0.999997
AP1AR	1965.54	-0.00273494	0.0223374	0.569175	0.999997
AP1B1	9435.68	0.00450204	0.0221055	0.507832	0.998197
AP1G1	6692.65	0.00165937	0.0216762	0.799158	0.999997
AP1G2	4467.73	0.00551888	0.023036	0.269197	0.958191
AP1M1	2825.33	0.0116276	0.0240094	0.212216	0.94277
AP1M2	3134.69	0.00511186	0.0231909	0.164364	0.917155
AP1S1	1492.15	0.00776621	0.0236064	0.205023	0.937115
AP1S2	1569.05	-0.00214957	0.0223974	0.602178	0.999997
AP1S3	319.516	-0.00183245	0.0223777	0.649526	0.999997
AP2A1	10875.3	0.00905773	0.0235354	0.249662	0.953553
AP2A2	8858.47	0.000751799	0.0213852	0.877853	0.999997
AP2B1	10408.8	0.0226313	0.0399715	0.0142394	0.539118
AP2M1	11681.5	0.00273327	0.022151	0.620368	0.999997
AP2S1	4075.77	0.00789724	0.0238402	0.17361	0.921626
AP3B1	6973.35	0.000129676	0.0215811	0.99679	0.999997
AP3B2	823.602	0.0140751	0.0293758	0.000982807	0.166594
AP3D1	14296.6	0.0171291	0.0297059	0.0688082	0.812083
AP3M1	3362.75	0.00142011	0.0218147	0.804121	0.999997
AP3M2	1662.84	6.24326e-05	0.0221773	0.989327	0.999997
AP3S1	3344.71	0.00215158	0.0225303	0.52824	0.999461
AP3S2	75.7218	-0.00135311	0.0225043	0.650502	0.999997
AP4B1	1214.99	-0.00530732	0.0229664	0.285087	0.964745
AP4E1	1920.14	-0.00300208	0.0221012	0.60598	0.999997
AP4M1	966.352	-0.00395281	0.0217185	0.590126	0.999997
AP4S1	258.556	-0.0037039	0.0220809	0.568869	0.999997
AP5B1	1620.54	0.00225919	0.0221677	0.412563	0.988558
AP5M1	2785.18	0.00219374	0.022463	0.567192	0.999997
AP5S1	529.768	-0.00210732	0.0220708	0.698789	0.999997
AP5Z1	2505.85	0.00118158	0.0220619	0.819017	0.999997
APAF1	2890.79	0.00225211	0.0220763	0.679839	0.999997
APBA1	710.062	0.00304992	0.0225393	0.462528	0.995808
APBA2	1098.86	-0.00267241	0.0227746	0.214473	0.94277
APBA3	1235.96	0.00229349	0.0216117	0.742072	0.999997
APBB1	1202.04	0.252389	0.105703	0.000471771	0.116498
APBB1IP	2095.08	-0.000833771	0.0225211	0.741036	0.999997
APBB2	6777.11	6.63543e-05	0.0215832	0.971283	0.999997
APBB3	1253.16	0.00599444	0.0234015	0.173318	0.921626
APC	53014.2	-0.00705942	0.0228623	0.325242	0.978448
APC2	130.467	0.00474914	0.023237	0.0672871	0.811258
APCDD1	1631.18	0.0016102	0.0226046	0.49454	0.997044
APCDD1L	229.927	-0.00136656	0.0226556	0.366304	0.984284
APCS	3824.23	-4.38958e-06	0.0226512	0.992908	0.999997
APEH	4754.07	0.0103444	0.0253383	0.0788216	0.829008
APEX1	7408.9	-0.00011352	0.022132	0.979609	0.999997
APEX2	1866.08	0.00715129	0.0230789	0.284021	0.964516
APH1A	5910.14	0.00186418	0.0220414	0.733215	0.999997
APH1B	604.866	0.0252445	0.0396675	0.0404838	0.728304
API5	6296.98	-0.00272001	0.0219758	0.652754	0.999997
APIP	1851.99	-0.0103376	0.0248607	0.124651	0.893067
APITD1	4.42082	-0.000366525	0.022636	0.683901	0.999997
APLF	624.551	0.00282719	0.0226986	0.389269	0.986334
APLN	120.786	-0.0045756	0.0232667	0.012542	0.525783
APLNR	1009.31	2.73706e-06	0.0224639	0.869476	0.999997
APLP1	697.82	-8.66066e-06	0.0224999	0.995338	0.999997
APLP2	22220.7	0.0134329	0.0270291	0.0800018	0.829864
APMAP	4613.83	0.000969486	0.0217842	0.872962	0.999997
APOA1	16789.9	0.000121428	0.0226421	0.822747	0.999997
APOA1BP	3050.98	0.00540221	0.0229688	0.288448	0.96704
APOA2	10688.1	-0.000273871	0.0226496	0.536129	0.999461
APOA4	1427.83	6.75914e-05	0.0226514	0.735166	0.999997
APOA5	2196.81	-4.38743e-05	0.0226507	0.881722	0.999997
APOB	171722	-0.000276895	0.0226427	0.642582	0.999997
APOBEC2	25.5468	0.000398023	0.0226454	0.626441	0.999997
APOBEC3A	166.757	0.00249677	0.0228166	0.0458398	0.75402
APOBEC3B	2958.07	0.00534163	0.0233206	0.115626	0.886595
APOBEC3C	925.525	-0.000996116	0.0225013	0.722024	0.999997
APOBEC3D	1051.51	0.0038082	0.0227922	0.311471	0.973748
APOBEC3F	1798.17	0.00820155	0.0243751	0.0747686	0.823387
APOBEC3G	1108.85	0.00202185	0.0226175	0.449316	0.992953
APOBEC3H	62.3295	0.00122044	0.022641	0.436084	0.990616
APOBEC4	2.11815	-3.88795e-05	0.0226512	0.86984	0.999997
APOBR	703.81	-0.00304906	0.0227925	0.254813	0.955776
APOC1	9497.19	0.000596226	0.022586	0.736398	0.999997
APOC1P1	217.923	0.000459783	0.0225924	0.785472	0.999997
APOC3	14413.3	4.64457e-05	0.0226504	0.85021	0.999997
APOD	2029.29	0.00183403	0.0227164	0.165544	0.917267
APOE	21318.5	0.00195973	0.0226135	0.457942	0.995136
APOF	656.402	0.000280718	0.0226472	0.606027	0.999997
APOH	15963.9	1.87711e-05	0.0226502	0.918769	0.999997
APOL1	2718.99	0.00506115	0.0232318	0.130112	0.898061
APOL2	3265.83	0.00550045	0.0232529	0.175092	0.924387
APOL3	1735.69	0.0115879	0.0268917	0.00581056	0.384222
APOL4	620.173	0.00216267	0.0226583	0.385036	0.986195
APOL5	7.58162	-0.000264126	0.0226426	0.668773	0.999997
APOL6	2404.48	0.00542729	0.0233458	0.113223	0.884111
APOLD1	333.317	0.000960006	0.0222866	0.815642	0.999997
APOM	341.943	0.00161715	0.0226068	0.493683	0.997044
APOO	626.971	0.00289484	0.0223349	0.558838	0.999461
APOOL	1526.36	-0.00295684	0.0223388	0.554622	0.999461
APOPT1	1364.75	4.67559e-05	0.0223056	0.99143	0.999997
APP	31351.4	0.0059868	0.0233475	0.179976	0.926889
APPBP2	3557.27	-0.00212666	0.0217019	0.745597	0.999997
APPL1	5482.74	-0.000860607	0.021682	0.924636	0.999997
APPL2	2088.71	-0.0165327	0.0289748	0.07405	0.821879
APRT	1441.1	0.00138452	0.0219945	0.787677	0.999997
APTR	33.0816	-0.00495937	0.0232803	0.0804966	0.829864
APTX	1340.39	-0.00606736	0.021912	0.447937	0.992656
AQP1	2765.13	0.00349916	0.0228687	0.211684	0.94203
AQP10	3.18627	-0.000186757	0.0226435	0.780359	0.999997
AQP11	202.408	-0.0018043	0.0225715	0.522679	0.999461
AQP12A	1.89046	6.93846e-05	0.0226515	0.710851	0.999997
AQP12B	5.81627	-2.88864e-05	0.0226513	0.933978	0.999997
AQP3	4251.98	0.00298384	0.0228744	0.0780074	0.828611
AQP4	6.53739	0.000340068	0.0226393	0.671143	0.999997
AQP5	1197.85	0.00161168	0.0226997	0.17922	0.926736
AQP6	30.2969	-0.000919048	0.0226298	0.528302	0.999461
AQP7	296.119	0.00106682	0.0226414	0.435232	0.990497
AQP8	4.26361	0.000133972	0.022631	0.91504	0.999997
AQP9	939.102	0.00358172	0.0229871	0.0607971	0.797301
AQPEP	72.3389	0.00055331	0.0225865	0.755762	0.999997
AQR	5371.58	-0.00900485	0.023182	0.288847	0.96704
AR	18771.9	0.002689	0.0227143	0.322119	0.976165
ARAF	29333.8	0.00298731	0.0221994	0.587703	0.999997
ARAP1	11300.2	0.00294948	0.0214131	0.696422	0.999997
ARAP2	4198.27	0.00154772	0.0224344	0.663353	0.999997
ARAP3	2265.68	0.003238	0.0226316	0.408067	0.988558
ARC	41.6519	-0.000742692	0.0225939	0.681709	0.999997
ARCN1	7396.46	0.00119805	0.0211082	0.845194	0.999997
AREG	748.137	-0.000628892	0.0225526	0.770706	0.999997
AREGB	34.4983	-0.000745885	0.0226511	0.370987	0.984284
AREL1	3053.36	-0.00085497	0.022048	0.866196	0.999997
ARF1	13816.4	0.0043298	0.0225552	0.419212	0.988558
ARF3	3250.31	0.013051	0.0254213	0.157847	0.913346
ARF4	6265.01	-0.00833855	0.0236045	0.230484	0.949265
ARF5	3385.99	0.0095366	0.0241543	0.190164	0.928968
ARF6	7212.14	0.00708439	0.023624	0.174559	0.923684
ARFGAP1	4349.21	-0.00468564	0.0227669	0.34392	0.980638
ARFGAP2	2934.32	-0.00374535	0.0220898	0.366828	0.984284
ARFGAP3	3202.6	0.00205735	0.0219954	0.718045	0.999997
ARFGEF1	27243.9	-0.000975577	0.0215133	0.88477	0.999997
ARFGEF2	13312.1	0.0156023	0.0283262	0.0805084	0.829864
ARFIP1	2326.14	0.0017977	0.0216927	0.672716	0.999997
ARFIP2	2026.04	-0.00322148	0.0221067	0.628095	0.999997
ARFRP1	2680.32	-0.00113072	0.0222162	0.79955	0.999997
ARG1	2299.41	7.91588e-05	0.0226479	0.846139	0.999997
ARG2	236.726	0.00201606	0.0224781	0.614403	0.999997
ARGLU1	5062.37	-0.00253207	0.0226028	0.463101	0.995808
ARHGAP1	5540.07	-0.00348749	0.0222277	0.973388	0.999997
ARHGAP10	2298.14	-0.00513172	0.0230817	0.226144	0.947261
ARHGAP11A	3341.65	-0.00302183	0.0226685	0.380235	0.986195
ARHGAP11B	1069.53	-0.00314473	0.0226602	0.387952	0.986195
ARHGAP12	6423.96	0.000605298	0.0221804	0.894391	0.999997
ARHGAP15	1250.21	0.0011491	0.0225411	0.653246	0.999997
ARHGAP17	4607.91	0.00198553	0.0220789	0.712316	0.999997
ARHGAP18	3879.24	-0.00210259	0.022453	0.580087	0.999997
ARHGAP19	27.766	0.000163464	0.0224973	0.892879	0.999997
ARHGAP20	204.067	-0.00362126	0.022979	0.0846044	0.835986
ARHGAP21	18137	-0.0111004	0.0259314	0.0568939	0.786965
ARHGAP22	769.082	-0.00343195	0.0227969	0.282456	0.964516
ARHGAP23	3514.08	-0.00146702	0.022491	0.638038	0.999997
ARHGAP24	922.655	9.04295e-05	0.0224601	0.976336	0.999997
ARHGAP25	1166.83	0.000718263	0.022459	0.809621	0.999997
ARHGAP26	3190.46	0.00185702	0.0225099	0.57316	0.999997
ARHGAP27	2477.56	-0.000819665	0.022167	0.858188	0.999997
ARHGAP28	598.815	-0.00410093	0.0229671	0.195505	0.929557
ARHGAP29	13964.8	0.0090964	0.0240986	0.183551	0.926889
ARHGAP30	3410.33	-0.00137196	0.0224688	0.668029	0.999997
ARHGAP31	3961.78	0.00159659	0.0224115	0.667964	0.999997
ARHGAP32	7390.67	0.0123001	0.0264366	0.0750374	0.823397
ARHGAP33	3646.39	0.00118672	0.0223115	0.770488	0.999997
ARHGAP35	20640.5	0.00555271	0.0231902	0.209681	0.940861
ARHGAP36	2.95451	-2.05466e-05	0.0226501	0.943642	0.999997
ARHGAP39	3495.65	-0.00785655	0.0242683	0.0652559	0.809257
ARHGAP4	3790.31	-0.00122138	0.022376	0.74051	0.999997
ARHGAP40	287.869	0.00472448	0.0232833	0.0284015	0.666768
ARHGAP42	1256.49	-0.00260451	0.0226224	0.424173	0.988558
ARHGAP44	787.92	0.00483633	0.0231854	0.127591	0.895782
ARHGAP5	18366.6	-0.00300341	0.0223741	0.535699	0.999461
ARHGAP6	373.594	0.000255794	0.0225393	0.908017	0.999997
ARHGAP8	24.0177	0.000419949	0.0225673	0.804467	0.999997
ARHGAP9	1113.71	-0.00148517	0.022558	0.573062	0.999997
ARHGDIA	13471.8	0.00700488	0.0218602	0.428441	0.989799
ARHGDIB	4019.68	0.00151345	0.0225157	0.614155	0.999997
ARHGDIG	80.1187	-0.0018881	0.0227421	0.065345	0.809257
ARHGEF1	8058.03	-0.000768167	0.0220631	0.877645	0.999997
ARHGEF10	4307.19	-0.00453312	0.0229132	0.273185	0.960248
ARHGEF10L	5870.06	0.0212906	0.0360687	0.0411955	0.731564
ARHGEF11	8130.22	-0.000336957	0.0214031	0.952055	0.999997
ARHGEF12	18893	0.00243057	0.0221256	0.654866	0.999997
ARHGEF15	1192.28	-0.00485297	0.0231665	0.143324	0.908769
ARHGEF16	2164.34	0.004446	0.0228526	0.302433	0.969363
ARHGEF17	9498.49	0.000665711	0.0221724	0.819499	0.999997
ARHGEF18	3821.24	0.00241013	0.0214764	0.739119	0.999997
ARHGEF19	1645.25	0.000932629	0.0219423	0.86639	0.999997
ARHGEF2	10929	0.142254	0.105315	0.00370504	0.319432
ARHGEF25	1393.15	0.00202948	0.0223315	0.643302	0.999997
ARHGEF26	2825.26	-0.0114461	0.0266554	0.010811	0.495967
ARHGEF28	2413.39	0.00200526	0.0222431	0.673443	0.999997
ARHGEF3	1791.31	0.00386303	0.0225349	0.438522	0.990717
ARHGEF33	63.7755	-0.00585778	0.0235178	0.0828463	0.835366
ARHGEF34P	1472.41	0.00828634	0.0242879	0.103078	0.862332
ARHGEF35	804.441	0.00622621	0.0234395	0.183179	0.926889
ARHGEF37	1291.88	0.00739813	0.0236906	0.163487	0.916501
ARHGEF38	1136.26	-0.00213508	0.0226699	0.361482	0.981824
ARHGEF39	422.435	-0.00198032	0.0224315	0.78311	0.999997
ARHGEF4	1143.6	0.00113791	0.0226347	0.464527	0.995946
ARHGEF40	5008.73	-0.00628159	0.0234859	0.151491	0.912279
ARHGEF5	2792.23	0.00869965	0.0243325	0.125721	0.894178
ARHGEF6	3480.08	-0.00384075	0.0228595	0.25967	0.957046
ARHGEF7	6273.63	-0.00412728	0.0220595	0.546064	0.999461
ARHGEF9	1681.6	-0.00186421	0.0209253	0.811776	0.999997
ARID1A	100557	0.00313884	0.0220764	0.600933	0.999997
ARID1B	15914	0.0100318	0.0241313	0.203246	0.935078
ARID2	11285.5	-0.00198129	0.0215305	0.775576	0.999997
ARID3A	1421.18	-0.000938269	0.0221382	0.842841	0.999997
ARID3B	707.436	0.00100264	0.022072	0.843715	0.999997
ARID3C	95.3035	0.000820125	0.0225728	0.695147	0.999997
ARID4A	3467.01	-0.0160611	0.0290082	0.067267	0.811258
ARID4B	9921.92	-0.00324219	0.0213886	0.673203	0.999997
ARID5A	2266.59	-0.00486937	0.0226089	0.39244	0.988506
ARID5B	5334.78	0.000767693	0.0222972	0.84863	0.999997
ARIH1	5263.59	0.0158231	0.0278614	0.09942	0.855417
ARIH2	3894.1	-0.0143232	0.0256891	0.155152	0.912482
ARIH2OS	41.2014	0.000849778	0.0225278	0.687151	0.999997
ARL1	4340.66	-0.0099768	0.0241309	0.201763	0.934278
ARL10	247.721	-0.00170973	0.022544	0.56074	0.999997
ARL11	117.327	-0.00105409	0.0222661	0.815143	0.999997
ARL13A	2.56674	-3.17192e-06	0.0226512	0.924094	0.999997
ARL13B	1021.49	0.000840641	0.0220142	0.873142	0.999997
ARL14	9.35233	0.000568495	0.0226507	0.402962	0.988558
ARL14EP	1417.56	-0.00458033	0.022505	0.425326	0.988558
ARL15	529.814	-0.00289034	0.0223516	0.552653	0.999461
ARL16	516.664	0.00248707	0.0219559	0.672487	0.999997
ARL17A	977.735	-0.00602506	0.0231699	0.198329	0.930325
ARL17B	88.5172	-0.00644465	0.0238068	0.0401139	0.726115
ARL2	1134.81	0.0078575	0.0240878	0.123087	0.891054
ARL2BP	1451.65	-0.00889873	0.0242337	0.134049	0.900939
ARL3	1198.65	0.00525018	0.0229203	0.300851	0.969363
ARL4A	593.847	0.000665222	0.0223408	0.858961	0.999997
ARL4C	1564.95	-0.00127664	0.0223883	0.726786	0.999997
ARL4D	240.384	0.000765271	0.0225282	0.756756	0.999997
ARL5A	2750.09	0.00166752	0.0223571	0.68066	0.999997
ARL5B	2003.52	0.0010277	0.0221909	0.822839	0.999997
ARL5C	4.03365	-0.000451898	0.0226475	0.490656	0.997044
ARL6	332.963	1.43202e-05	0.0222554	0.998512	0.999997
ARL6IP1	7054.03	-0.00398242	0.0227204	0.356696	0.980638
ARL6IP4	3268.86	0.000750418	0.0213979	0.915628	0.999997
ARL6IP5	3546.45	0.00411716	0.0222816	0.49618	0.997271
ARL6IP6	1600.3	-0.0125522	0.0257944	0.132585	0.899054
ARL8A	2996.02	0.0125775	0.0260598	0.105282	0.865442
ARL8B	3094.77	-0.00107328	0.0212544	0.900782	0.999997
ARL9	95.2967	-0.00225371	0.022626	0.413611	0.988558
ARMC1	3091.2	-0.00177677	0.021868	0.765864	0.999997
ARMC10	2039.95	-0.00312338	0.0225389	0.461701	0.995808
ARMC12	68.0514	-0.00315641	0.0228142	0.217637	0.94307
ARMC2	622.069	-0.0109843	0.0261178	0.0315796	0.686665
ARMC3	178.283	-0.00367142	0.0230003	0.0695302	0.812083
ARMC4	74.252	-0.00189689	0.022687	0.312099	0.973748
ARMC5	818.291	-0.0120765	0.0262616	0.0741672	0.821879
ARMC6	1756.18	-0.00121548	0.021366	0.86481	0.999997
ARMC7	481.35	0.00327447	0.0217907	0.632748	0.999997
ARMC8	4085.76	-0.00652139	0.0220343	0.441856	0.991048
ARMC9	1716.93	-0.00701986	0.02393	0.0697937	0.813239
ARMCX1	877.026	-0.00042098	0.0223481	0.90639	0.999997
ARMCX2	2008.27	0.00579589	0.0231281	0.249646	0.953553
ARMCX3	3365.99	-0.00113247	0.0214997	0.867836	0.999997
ARMCX4	1154.64	-0.00114667	0.0223102	0.775206	0.999997
ARMCX5	603.987	0.00228209	0.0217687	0.644228	0.999997
ARMCX5-GPRASP2	42.6971	0.00148908	0.0225154	0.622295	0.999997
ARMCX6	631.211	0.000393837	0.0216385	0.94799	0.999997
ARNT	4411.04	0.0109971	0.024065	0.217468	0.94307
ARNT2	1012.76	0.00155202	0.022521	0.649888	0.999997
ARNTL	1540.35	0.00292311	0.022482	0.500863	0.997423
ARNTL2	1153.59	0.00528486	0.0231163	0.219329	0.94364
ARPC1A	6429.53	0.001609	0.0222812	0.7142	0.999997
ARPC1B	9538.52	0.00239861	0.021483	0.739761	0.999997
ARPC2	11915.2	0.00308025	0.0217776	0.649928	0.999997
ARPC3	4274.48	-0.00226084	0.0219168	0.706493	0.999997
ARPC4	1292.23	0.00359966	0.0223359	0.502353	0.997423
ARPC5	4430.88	0.000562612	0.0215798	0.932586	0.999997
ARPC5L	1240.49	0.00137581	0.0219806	0.761226	0.999997
ARPP19	2961.96	0.00739187	0.0234219	0.236669	0.951529
ARPP21	32.6624	-0.002774	0.0228695	0.0248201	0.636001
ARRB1	2388.26	0.00908424	0.0247078	0.0842909	0.835627
ARRB2	3199.13	0.00260887	0.0225075	0.508103	0.998435
ARRDC1	3588.27	-0.00562356	0.0230258	0.275588	0.960784
ARRDC2	1190.89	0.0022902	0.0225435	0.494935	0.997044
ARRDC3	4164.94	0.000732148	0.0223951	0.831095	0.999997
ARRDC4	1012.78	0.00171353	0.0224366	0.638626	0.999997
ARRDC5	107.608	-0.00109782	0.0226028	0.563283	0.999997
ARSA	3503.76	0.00298965	0.0219039	0.641124	0.999997
ARSB	1348.23	-0.00904831	0.0243332	0.151176	0.912279
ARSD	3482.54	-0.00472121	0.0228757	0.300599	0.969363
ARSE	222.514	-0.00358576	0.0229883	0.0623663	0.799672
ARSF	29.7002	0.000139705	0.0226397	0.834322	0.999997
ARSG	3491.16	0.000511966	0.0220474	0.920449	0.999997
ARSH	22.1345	0.00204137	0.0227439	0.134568	0.900939
ARSI	317.672	0.00343906	0.0228958	0.165465	0.917267
ARSJ	367.695	-0.00260757	0.0226278	0.42015	0.988558
ARSK	342.122	0.00849873	0.0237772	0.215377	0.942957
ART1	16.2158	-0.00080797	0.0226619	0.191814	0.928968
ART3	1506.83	0.00317626	0.0229284	0.0373749	0.712992
ART4	195.818	-8.88832e-05	0.0226238	0.927499	0.999997
ART5	17.722	0.00192691	0.0227331	0.142296	0.907805
ARTN	210.466	-0.00405018	0.0230119	0.144001	0.908998
ARV1	1288.26	-8.93211e-05	0.0221988	0.950151	0.999997
ARVCF	2517.27	0.000208444	0.0222444	0.961043	0.999997
ARX	29.4055	0.000105128	0.0226323	0.89536	0.999997
AS3MT	7.81534	-4.98134e-05	0.0226122	0.968765	0.999997
ASAH1	13876.9	0.00161996	0.0224049	0.667513	0.999997
ASAH2	82.5255	-0.000764938	0.0224253	0.858642	0.999997
ASAH2B	177.474	0.00159379	0.022406	0.658404	0.999997
ASAP1	10144.7	-0.00506901	0.0225036	0.412806	0.988558
ASAP2	5137.25	-8.79282e-05	0.0221654	0.983549	0.999997
ASAP3	2442.49	0.00272924	0.0225518	0.474781	0.997
ASB1	622.416	-0.00588299	0.0232129	0.223861	0.944854
ASB10	3.81607	4.86448e-05	0.0226499	0.850362	0.999997
ASB11	1.88687	-0.000146312	0.0226457	0.813496	0.999997
ASB12	8.09472	0.00227347	0.0227914	0.0531723	0.779955
ASB13	933.631	0.001811	0.022202	0.70807	0.999997
ASB14	15.534	-0.000766121	0.0226346	0.534396	0.999461
ASB15	5.06479	0.00017867	0.0226505	0.62729	0.999997
ASB16	196.555	0.000602177	0.0224587	0.839853	0.999997
ASB16-AS1	654.885	-0.0013816	0.022049	0.791666	0.999997
ASB2	160.99	0.00361145	0.0229946	0.0597019	0.794947
ASB3	119.367	-0.00378867	0.0227202	0.363725	0.983273
ASB4	16.7931	0.0018653	0.0227377	0.0879244	0.840662
ASB5	18.8448	0.000265615	0.0226416	0.724262	0.999997
ASB6	1508.62	-0.000425545	0.0215979	0.947223	0.999997
ASB7	997.246	-0.000617527	0.0215626	0.925059	0.999997
ASB8	775.755	0.00248788	0.0217113	0.779711	0.999997
ASB9	92.388	-0.000203816	0.0224044	0.949684	0.999997
ASCC1	1205.06	0.0107924	0.0238199	0.232431	0.950292
ASCC2	3495.32	-0.00313559	0.0217448	0.648038	0.999997
ASCC3	9926.41	-0.0156417	0.0253493	0.162116	0.915932
ASCL1	80.3303	0.00211073	0.0227112	0.277939	0.962987
ASCL2	44.4673	0.000953954	0.0225936	0.6235	0.999997
ASCL4	2.628	7.47271e-06	0.022651	0.9389	0.999997
ASF1A	1205.76	-0.00083765	0.0222023	0.812493	0.999997
ASF1B	761.624	0.00365326	0.0227652	0.323706	0.977768
ASGR1	2071.46	0.00491359	0.0232331	0.104865	0.865442
ASGR2	1552.25	0.00283551	0.0227527	0.284815	0.964516
ASH1L	28546.2	-0.00203666	0.0208015	0.808158	0.999997
ASH1L-AS1	311.989	-0.0031147	0.0226813	0.372532	0.984284
ASH2L	5035	0.00215191	0.0217	0.744656	0.999997
ASIC1	480.753	-0.00459267	0.0231175	0.139789	0.904562
ASIC2	68.1326	-0.00171913	0.0227286	0.0555466	0.78418
ASIC3	599.6	-0.00243353	0.0226695	0.371806	0.984284
ASIC4	34.2254	-1.13936e-05	0.0226083	0.991432	0.999997
ASIP	11.8944	-0.00083362	0.022643	0.458733	0.995397
ASL	3689.11	0.000244837	0.0220674	0.961837	0.999997
ASMT	16.396	-0.00203895	0.0227421	0.148848	0.912279
ASMTL	2956.31	0.00312121	0.022442	0.505859	0.997616
ASMTL-AS1	401.852	-0.00524992	0.0231937	0.178765	0.925859
ASNA1	2442.48	0.00666686	0.0232908	0.222766	0.944405
ASNS	2695.18	0.0075287	0.023955	0.118524	0.889017
ASNSD1	2728.76	-0.00398757	0.0224715	0.455372	0.994513
ASPA	139.175	0.00229437	0.0227681	0.132865	0.899054
ASPDH	155.992	-0.00097959	0.0226536	0.372274	0.984284
ASPG	650.069	0.00134869	0.0226781	0.228257	0.947512
ASPH	8751.47	-0.00173301	0.0219785	0.756755	0.999997
ASPHD1	316.973	0.001496	0.0224509	0.684058	0.999997
ASPHD2	315.423	0.00564825	0.0235189	0.048157	0.759006
ASPM	15096.2	-0.00295754	0.0226329	0.408632	0.988558
ASPN	5372.53	-0.000814808	0.0226038	0.623307	0.999997
ASPRV1	170.894	0.000880793	0.0226562	0.30745	0.97181
ASPSCR1	1888.97	-0.00694787	0.0230188	0.306488	0.971305
ASRGL1	327	0.00701325	0.0240168	0.0403318	0.728083
ASS1	8129.81	0.00144801	0.022541	0.599856	0.999997
ASTE1	578.243	-0.014624	0.0283236	0.0535504	0.780431
ASTL	11.9725	-0.00058938	0.0226005	0.720454	0.999997
ASTN1	94.496	0.000659817	0.0226357	0.537051	0.999461
ASTN2	1708.87	0.00249208	0.0225426	0.49384	0.997044
ASUN	2850.83	-0.00768532	0.0239994	0.120057	0.889017
ASXL1	43790.4	-0.000300399	0.0210762	0.968095	0.999997
ASXL2	6494.68	-0.00483352	0.021071	0.558947	0.999461
ASXL3	125.362	-0.00210543	0.0226172	0.431966	0.990497
ASZ1	3.52157	7.82905e-05	0.0226484	0.854305	0.999997
ATAD1	2455.19	-0.00574657	0.0215094	0.506042	0.997619
ATAD2	11950.5	0.000103431	0.0221675	0.983452	0.999997
ATAD2B	5140.19	-0.0144266	0.0288945	0.0223184	0.618245
ATAD3A	2855.34	-0.00409882	0.0226298	0.396514	0.988558
ATAD3B	3263.1	-0.00311363	0.0225088	0.475659	0.997
ATAD3C	1519.09	-0.00201501	0.0226262	0.446997	0.992656
ATAD5	2131.12	-0.00204843	0.0224005	0.611812	0.999997
ATAT1	1559.59	-0.00782128	0.0236758	0.242217	0.95206
ATCAY	2.15145	0.00018066	0.0226513	0.54514	0.999461
ATE1	2482.48	0.00199047	0.0220178	0.728893	0.999997
ATE1-AS1	36.0176	-0.000391708	0.0225504	0.853761	0.999997
ATF1	1171.43	-0.00030204	0.0220755	0.913755	0.999997
ATF2	4071.75	8.06308e-05	0.0216998	0.990225	0.999997
ATF3	558.46	0.00206847	0.0226702	0.361991	0.982045
ATF4	16219.2	0.00601075	0.0232197	0.229548	0.947858
ATF5	5079.03	0.00112453	0.0224709	0.715465	0.999997
ATF6	8104.53	0.00761895	0.0233875	0.248986	0.953553
ATF6B	5252.4	0.00450222	0.0222674	0.480626	0.997044
ATF7	1923.65	-0.00456179	0.0215342	0.401286	0.988558
ATF7IP	13952.9	-1.9317e-05	0.0220018	0.996214	0.999997
ATF7IP2	1844.45	-0.00500608	0.0230882	0.212205	0.94277
ATG10	568.312	-0.00590075	0.0230419	0.284702	0.964516
ATG101	1365.21	0.00149066	0.0220844	0.748667	0.999997
ATG12	928.918	0.00263081	0.0223786	0.565354	0.999997
ATG13	4018.21	-0.00228462	0.0220945	0.674743	0.999997
ATG14	985.37	0.00151043	0.0211968	0.804148	0.999997
ATG16L1	1897.07	-0.00528928	0.022792	0.337513	0.980638
ATG16L2	3195.6	0.000222432	0.0222851	0.956455	0.999997
ATG2A	4093.01	0.000470288	0.0217544	0.938749	0.999997
ATG2B	6056.54	-0.0132708	0.023836	0.240688	0.95206
ATG3	2989.89	0.00402408	0.0226085	0.407313	0.988558
ATG4A	938.475	0.003677	0.0225835	0.404249	0.988558
ATG4B	3008.32	-0.00267937	0.0219841	0.655168	0.999997
ATG4C	1359.49	0.00081477	0.0221627	0.861307	0.999997
ATG4D	1372.82	0.00720321	0.0234945	0.233601	0.950537
ATG5	1899.56	-0.00246643	0.0219237	0.663108	0.999997
ATG7	2094.83	-0.00916191	0.0239515	0.204044	0.935647
ATG9A	2895.01	-0.00689733	0.022734	0.344448	0.980638
ATG9B	297.779	0.00678112	0.0239768	0.0240856	0.633896
ATHL1	10489.9	-0.00321364	0.0226022	0.424464	0.988558
ATIC	4095.85	0.00161901	0.0219859	0.771346	0.999997
ATL1	684.528	0.00985828	0.0254094	0.0340004	0.701834
ATL2	5651.05	0.0022645	0.0223785	0.564173	0.999997
ATL3	6222.74	-0.00800992	0.0230062	0.303046	0.969363
ATM	113696	-0.00447887	0.0229456	0.250404	0.953553
ATMIN	5993.79	-0.000258853	0.0223893	0.93722	0.999997
ATN1	28233.1	0.00548562	0.0230756	0.252831	0.955121
ATOH7	11.6182	0.000514587	0.0226206	0.694979	0.999997
ATOH8	231.19	0.00475893	0.0232958	0.0231676	0.624526
ATOX1	2202.54	0.0191715	0.0356364	0.00738522	0.424781
ATP10A	2385.06	-0.0027003	0.0226368	0.408842	0.988558
ATP10B	111.584	0.00140739	0.0227006	0.0611783	0.798217
ATP10D	3369.91	-0.0048023	0.022826	0.323563	0.977483
ATP11A	8456.46	0.0104437	0.0249115	0.135322	0.901644
ATP11B	8883.51	-0.000135143	0.0223714	0.967407	0.999997
ATP11C	5544.2	-0.0102866	0.0253966	0.0669079	0.811258
ATP12A	23.831	0.000600053	0.0226514	0.353556	0.980638
ATP13A1	7531.65	0.00432373	0.0223191	0.478537	0.997044
ATP13A2	5213.3	-0.000788272	0.0221442	0.865961	0.999997
ATP13A3	15641.7	-0.00123396	0.0221413	0.797519	0.999997
ATP13A4	599.454	0.00339992	0.0229752	0.0281031	0.666768
ATP13A5	805.743	0.000770755	0.0226549	0.314455	0.97444
ATP1A1	32390.5	0.00600387	0.0233192	0.192804	0.929538
ATP1A1-AS1	120.109	0.00673392	0.0237131	0.11105	0.878223
ATP1A2	183.435	0.00128802	0.0226638	0.315329	0.97444
ATP1A3	801.205	0.00877287	0.0250154	0.00708105	0.42217
ATP1A4	28.8605	-0.00115014	0.0225962	0.579324	0.999997
ATP1B1	10946.1	-0.00403773	0.0227896	0.319957	0.97565
ATP1B2	104.184	-1.58446e-05	0.0225781	0.990574	0.999997
ATP1B3	3811.53	-0.00415077	0.0222228	0.50506	0.997556
ATP1B4	2.80625	-1.32937e-05	0.0226511	0.998	0.999997
ATP2A1	381.634	0.00271004	0.022744	0.280804	0.9639
ATP2A2	22602.9	-0.00125365	0.0217725	0.836818	0.999997
ATP2A3	7575.18	0.00377984	0.0229663	0.140414	0.904562
ATP2B1	6528.86	-0.163789	0.0822891	0.00132897	0.195456
ATP2B2	958.739	-0.000962227	0.0226501	0.366404	0.984284
ATP2B3	90.5083	0.000142574	0.0226197	0.899053	0.999997
ATP2B4	10619.4	-0.003002	0.0218768	0.642308	0.999997
ATP2C1	11839.9	-0.00573915	0.0224834	0.400553	0.988558
ATP2C2	1594.58	0.00356348	0.0228751	0.213623	0.94277
ATP4A	2.97346	-0.000495156	0.0226554	0.217285	0.942957
ATP5A1	16812.1	-5.67361e-05	0.0218846	0.990779	0.999997
ATP5B	18487.6	0.00706678	0.0235051	0.204831	0.936921
ATP5C1	10456.5	0.00547634	0.0228362	0.330512	0.979921
ATP5D	1482.48	0.0263753	0.0509567	0.00713518	0.42217
ATP5E	194.845	0.00157777	0.0226062	0.496428	0.997271
ATP5EP2	303.152	0.00367599	0.0228962	0.207424	0.938846
ATP5F1	3777.57	0.00122917	0.0220611	0.812173	0.999997
ATP5G1	1076.16	0.00164048	0.0219071	0.811486	0.999997
ATP5G2	2548.85	0.000449395	0.0221808	0.921213	0.999997
ATP5G3	3211.16	0.00185542	0.0219341	0.750082	0.999997
ATP5H	3597.21	0.00775211	0.0237935	0.175356	0.924387
ATP5I	2764.52	0.0028903	0.0221755	0.601163	0.999997
ATP5J	2791.34	0.00359803	0.0225578	0.437483	0.990717
ATP5J2	362.95	-0.000252048	0.0213618	0.97202	0.999997
ATP5L	6121.77	-0.000577018	0.0221878	0.896383	0.999997
ATP5L2	178.04	0.000619244	0.0223182	0.873114	0.999997
ATP5O	4283.3	0.00874443	0.0244839	0.0995146	0.855417
ATP5S	575.814	-0.00412461	0.0225401	0.435586	0.990541
ATP5SL	706.21	0.00368098	0.0221601	0.545839	0.999461
ATP6AP1	11838.2	0.00341839	0.0225654	0.43976	0.991003
ATP6AP1L	250.674	-0.00214644	0.0224582	0.573675	0.999997
ATP6AP2	7663.42	-0.00242235	0.0221177	0.655696	0.999997
ATP6V0A1	5143.8	0.00708616	0.0225409	0.343413	0.980638
ATP6V0A2	2496.65	-0.014946	0.0271493	0.105398	0.865442
ATP6V0A4	411.253	-0.000721421	0.0225927	0.681086	0.999997
ATP6V0B	4295.16	0.00102763	0.0221384	0.9977	0.999997
ATP6V0C	16882.5	0.00258993	0.0223547	0.57764	0.999997
ATP6V0D1	2401.16	0.0056364	0.0226291	0.377593	0.986195
ATP6V0D2	72.987	-0.000539282	0.0226051	0.719225	0.999997
ATP6V0E1	4039.1	0.00942314	0.0246508	0.361599	0.981824
ATP6V0E2	1626.65	0.00661977	0.0237308	0.082223	0.834096
ATP6V1A	4673.51	0.00697418	0.0231693	0.283747	0.964516
ATP6V1B1	1075.46	-0.00084436	0.022477	0.769031	0.999997
ATP6V1B2	4702.94	0.00832068	0.0237798	0.203915	0.935267
ATP6V1C1	6017.09	-0.0022729	0.0220578	0.683068	0.999997
ATP6V1C2	620.59	0.00169969	0.022639	0.4242	0.988558
ATP6V1D	1495.99	-0.00773234	0.0234613	0.238548	0.952012
ATP6V1E1	2715.72	-0.00119306	0.0215566	0.859148	0.999997
ATP6V1E2	118.133	-0.00148615	0.0223379	0.657751	0.999997
ATP6V1F	2972.2	0.0017207	0.0222908	0.695968	0.999997
ATP6V1G1	2506.5	0.0167217	0.0299408	0.0547004	0.78105
ATP6V1G2	57.2615	0.00564342	0.0236195	0.0056254	0.384222
ATP6V1H	3091.35	0.0026364	0.0218706	0.677296	0.999997
ATP7A	3268.2	0.00692343	0.0224315	0.381119	0.986195
ATP7B	1412.35	-0.00665771	0.0235991	0.146901	0.912279
ATP8A1	2404.75	-0.00328537	0.0226171	0.41465	0.988558
ATP8A2	177.637	-0.00298194	0.0228838	0.0613085	0.798217
ATP8B1	5980.95	0.00924497	0.0247105	0.096115	0.851146
ATP8B2	5301.42	0.00511328	0.022806	0.336135	0.980638
ATP8B3	370.236	0.00455269	0.023081	0.164962	0.917267
ATP8B4	1894.38	0.00105389	0.0225485	0.665066	0.999997
ATP9A	8575.12	0.00125243	0.0222154	0.78272	0.999997
ATP9B	3521.69	-0.00978028	0.0247229	0.127221	0.895381
ATPAF1	1641.19	0.00461675	0.0225617	0.410891	0.988558
ATPAF2	520.602	0.00388921	0.0219828	0.540487	0.999461
ATPIF1	2089.37	0.0148059	0.027746	0.0995866	0.855417
ATR	63479.1	-0.0190147	0.033269	0.0302145	0.681342
ATRAID	2608.48	0.00200209	0.0222061	0.683469	0.999997
ATRIP	905.893	0.00598756	0.0217402	0.413172	0.988558
ATRN	7846.61	-0.00331686	0.0217586	0.590341	0.999997
ATRNL1	1437.64	-0.00101331	0.0225802	0.627027	0.999997
ATRX	119815	-0.00425344	0.0220827	0.523242	0.999461
ATXN1	6157.15	0.00495855	0.022732	0.358177	0.980638
ATXN10	5102.62	0.00478493	0.0227343	0.357299	0.980638
ATXN1L	3781.62	0.0017688	0.021697	0.785335	0.999997
ATXN2	9150.28	-0.00344042	0.0214769	0.650501	0.999997
ATXN2L	36416.4	0.00138348	0.0221027	0.784865	0.999997
ATXN3	1784.57	-0.0155624	0.0289714	0.0462048	0.758337
ATXN7	4418.14	-0.0021458	0.0210391	0.606277	0.999997
ATXN7L1	1307.12	-0.00126648	0.0216991	0.83877	0.999997
ATXN7L2	570.322	0.000713661	0.0216887	0.910364	0.999997
ATXN7L3	2766.57	0.00187094	0.021985	0.741098	0.999997
ATXN7L3B	1365.07	0.00144463	0.0222835	0.737251	0.999997
AUH	1216.8	-0.00452763	0.0226844	0.360661	0.981757
AUNIP	261.475	0.0033692	0.0225679	0.439087	0.990819
AUP1	4118.09	-0.00100039	0.0218541	0.862674	0.999997
AURKA	7418.76	-0.00215368	0.0225093	0.541667	0.999461
AURKAIP1	2262.02	0.00531683	0.0224414	0.419733	0.988558
AURKB	777.151	0.00135785	0.0223152	0.741754	0.999997
AURKC	74.8053	7.11248e-05	0.022288	0.986412	0.999997
AUTS2	15179.1	0.00280345	0.0226219	0.421979	0.988558
AVEN	551.869	-0.1411	0.104456	0.00375655	0.321105
AVIL	1135.37	-0.00375523	0.0227172	0.355711	0.980638
AVL9	3121.61	0.00295854	0.0219062	0.643537	0.999997
AVPI1	173.94	0.00518465	0.023187	0.153693	0.912482
AVPR1A	514.554	0.00342728	0.0228065	0.274199	0.960248
AVPR2	23.9562	0.00244384	0.0227892	0.124312	0.892753
AWAT2	2.16001	-0.000201838	0.0226489	0.707411	0.999997
AXDND1	60.9743	-0.00336824	0.0226767	0.399151	0.988558
AXIN1	5046.83	-0.00286197	0.0221359	0.610571	0.999997
AXIN2	1066.94	0.00119898	0.0223973	0.739626	0.999997
AXL	26017.1	-0.000425511	0.0223628	0.902168	0.999997
AZGP1	13211.3	0.00530912	0.0234913	0.00891286	0.4524
AZGP1P1	55.607	0.00256339	0.02279	0.163971	0.916867
AZI2	3112.87	0.00250292	0.0220489	0.661411	0.999997
AZIN1	16435.3	0.00131003	0.0221497	0.78725	0.999997
AZIN2	812.216	-0.00302302	0.0227897	0.246693	0.952301
AZU1	44.4867	0.00059569	0.0226036	0.708516	0.999997
B2M	36242.4	0.00454593	0.0230503	0.18699	0.928968
B3GALNT1	1506.74	-0.0085308	0.0245378	0.0693141	0.812083
B3GALNT2	4500.99	0.00178416	0.0218161	0.772189	0.999997
B3GALT1	15.8118	0.000887847	0.0226662	0.173178	0.921626
B3GALT2	19.6354	2.89515e-05	0.0226227	0.980101	0.999997
B3GALT4	581.705	0.00202039	0.0222123	0.687739	0.999997
B3GALT5	111.859	-0.00289565	0.0228353	0.145007	0.90965
B3GALT6	270.76	-8.50728e-06	0.0222019	0.997541	0.999997
B3GALTL	683.204	-0.0165485	0.0308554	0.0266859	0.654324
B3GAT1	128.313	0.00063509	0.0225827	0.734942	0.999997
B3GAT2	10.3015	0.000186701	0.0226337	0.830818	0.999997
B3GAT3	1641.12	-0.00180394	0.0221121	0.726251	0.999997
B3GNT1	876.925	-0.00262761	0.0221026	0.639148	0.999997
B3GNT2	2653.05	-0.0052837	0.0226478	0.377266	0.986195
B3GNT3	1443.76	0.854398	0.244427	8.83367e-06	0.0120934
B3GNT4	72.388	-0.000109521	0.0225643	0.95354	0.999997
B3GNT5	1363.73	-0.000763842	0.0223987	0.821163	0.999997
B3GNT7	617.689	0.00875026	0.0247905	0.0390722	0.718217
B3GNT8	224.428	0.0135058	0.0277677	0.0402406	0.727094
B3GNT9	914.802	0.000127424	0.0221718	0.980864	0.999997
B3GNTL1	331.997	0.00303787	0.0225507	0.521475	0.999461
B4GALNT1	498.534	0.00380742	0.0229824	0.126831	0.895261
B4GALNT2	77.307	-0.000298489	0.0226026	0.844434	0.999997
B4GALNT3	2209.42	0.00464138	0.0231527	0.119052	0.889017
B4GALNT4	5252.55	0.00124994	0.0224074	0.725353	0.999997
B4GALT1	13062.4	-0.00153529	0.0220785	0.766393	0.999997
B4GALT2	4121.57	-0.00342047	0.0223641	0.512384	0.999442
B4GALT3	3918.37	-0.000327018	0.0220611	0.84641	0.999997
B4GALT4	1626.17	0.00449991	0.0223941	0.455261	0.994513
B4GALT5	3730.78	0.194264	0.128243	0.00264351	0.272442
B4GALT6	346.232	-0.0103484	0.0254087	0.0701619	0.813239
B4GALT7	1557.49	0.00109141	0.0217008	0.863033	0.999997
B9D1	347.111	0.00293832	0.0225665	0.437196	0.990717
B9D2	136.399	-0.0145802	0.0294598	0.0086946	0.450542
BAALC	153.561	0.000874062	0.0226283	0.528146	0.999461
BAALC-AS1	4.13131	-0.000744002	0.0226522	0.379435	0.986195
BAALCOS	2.04296	-2.88099e-05	0.0226467	0.975553	0.999997
BAAT	2666.25	-0.00108801	0.0226355	0.46507	0.99618
BABAM1	2755.58	0.00709425	0.0232555	0.245736	0.952301
BACE1	1130.51	-0.00342804	0.0223327	0.498541	0.997336
BACE1-AS	63.4826	-0.00161217	0.0224441	0.64516	0.999997
BACE2	4162.17	0.00359464	0.0227447	0.335627	0.980638
BACH1	3558.08	0.00718096	0.0234181	0.230601	0.949265
BACH2	469.016	-0.00341056	0.0227802	0.254964	0.955776
BAD	1090.73	0.0037107	0.0224427	0.47488	0.997
BAG1	4242.94	0.0035594	0.0224049	0.493766	0.997044
BAG2	526.8	-0.00327934	0.0224928	0.476246	0.997
BAG3	5148.54	0.0111097	0.0255816	0.094549	0.847729
BAG4	3284.09	-0.000349976	0.0217984	0.952205	0.999997
BAG5	2043.76	-0.00279481	0.0217196	0.67997	0.999997
BAG6	14181.7	0.00948481	0.0244682	0.148166	0.912279
BAGE2	34.1612	0.00073672	0.0226226	0.597217	0.999997
BAHCC1	3472.88	-0.0205444	0.0357452	0.0225056	0.618346
BAHD1	2736	0.012008	0.0257768	0.107201	0.869872
BAI1	763.917	0.00611533	0.023579	0.0913951	0.844016
BAI2	3887.99	0.00403841	0.0228973	0.248447	0.953553
BAI3	164.804	0.00119113	0.0226491	0.397278	0.988558
BAIAP2	4303.71	0.000323792	0.0222754	0.936714	0.999997
BAIAP2-AS1	340.257	0.00319061	0.022447	0.541594	0.999461
BAIAP2L1	3259.4	0.00289663	0.0224083	0.533321	0.999461
BAIAP2L2	273.073	0.000757759	0.0225602	0.725184	0.999997
BAIAP3	1622.72	-0.000614934	0.0224213	0.847458	0.999997
BAK1	1049.92	0.00861092	0.0230217	0.286751	0.965587
BAMBI	3623.12	-0.00150561	0.0225086	0.618639	0.999997
BANF1	2126.57	-0.00432368	0.0227664	0.339684	0.980638
BANK1	677.974	-0.000234626	0.0225711	0.893257	0.999997
BANP	1979.74	-0.000391776	0.0213973	0.93375	0.999997
BAP1	16791	0.00744974	0.0221674	0.518942	0.999461
BARD1	2153.16	-0.000411525	0.0222045	0.923865	0.999997
BARHL1	2.51534	0.000759072	0.0226658	0.12709	0.895381
BARX1	357.822	0.000700782	0.0225998	0.682106	0.999997
BARX2	1378	0.00169292	0.0226271	0.450719	0.994039
BASP1	528.025	0.00429642	0.0230217	0.175967	0.92526
BATF	130.583	0.00379266	0.0228503	0.239006	0.952012
BATF2	354.035	0.00510113	0.0233773	0.0349354	0.708072
BATF3	101.029	-0.00225719	0.0226161	0.443435	0.991048
BAX	2390.58	0.00159544	0.0217379	0.767865	0.999997
BAZ1A	8110.67	-0.00849894	0.0237644	0.211244	0.941439
BAZ1B	13532.7	0.00634354	0.0224385	0.393987	0.988558
BAZ2A	15851.5	0.0114142	0.0255192	0.114212	0.884111
BAZ2B	12145.3	-0.00689203	0.0229115	0.318485	0.975394
BBC3	236.5	0.00248627	0.0224926	0.526132	0.999461
BBIP1	703.608	-0.0100507	0.0249792	0.107694	0.871952
BBOX1	620.81	0.000933092	0.0226654	0.207205	0.938846
BBS1	2095.64	-0.00328099	0.0223713	0.51849	0.999461
BBS10	1258.96	-0.00170957	0.0217088	0.826041	0.999997
BBS12	414.129	-0.0024544	0.0224447	0.536451	0.999461
BBS2	2677.63	-0.0546113	0.0604031	0.0135095	0.536116
BBS4	845.709	-0.00714901	0.0235085	0.207844	0.93993
BBS5	548.295	-0.0133026	0.0271427	0.0684497	0.812083
BBS7	1181.16	0.00512496	0.0222591	0.458648	0.995397
BBS9	2066.28	0.00242986	0.0223762	0.584289	0.999997
BBX	4364.06	0.00274508	0.02226	0.627037	0.999997
BCAM	21382.4	0.00290379	0.0225778	0.450132	0.993553
BCAN	127.349	0.00397925	0.0231283	0.00543927	0.381178
BCAP29	2392.57	-0.00731159	0.0236099	0.191806	0.928968
BCAP31	5941.84	-0.00112325	0.0220308	0.829302	0.999997
BCAR1	4981.01	0.00169429	0.0220882	0.843949	0.999997
BCAR3	1416	-0.0018802	0.0225656	0.518975	0.999461
BCAR4	69.5142	-0.000804498	0.0226423	0.494342	0.997044
BCAS1	1286.04	0.00240485	0.0227577	0.200935	0.933499
BCAS2	1381.75	-0.00149745	0.0218529	0.800604	0.999997
BCAS3	3958.58	-0.00311435	0.021877	0.63324	0.999997
BCAS4	713.306	0.00438135	0.0229341	0.251962	0.955041
BCAT1	1058.62	-0.00448815	0.0231748	0.0667417	0.811258
BCAT2	1661.99	0.0162067	0.0308549	0.0152117	0.544303
BCCIP	2822.7	0.0035628	0.022551	0.441459	0.991048
BCDIN3D	278.237	-0.0054507	0.0231629	0.214073	0.94277
BCDIN3D-AS1	19.3974	0.000315701	0.0225908	0.848136	0.999997
BCHE	588.266	-0.00109853	0.0226281	0.494797	0.997044
BCKDHA	3343.05	0.00257539	0.0217612	0.696657	0.999997
BCKDHB	1332.45	-0.00856106	0.0234467	0.276538	0.961633
BCKDK	3873.85	0.0097258	0.0249395	0.0931368	0.847729
BCL10	1244.83	0.00131569	0.0218894	0.820538	0.999997
BCL11A	878.814	0.00197983	0.0227305	0.157778	0.913346
BCL11B	508.091	0.00254843	0.0228056	0.100124	0.856582
BCL2	3455.16	0.000367663	0.0222797	0.927869	0.999997
BCL2A1	290.806	0.00157633	0.0226635	0.39949	0.988558
BCL2L1	3110.44	0.00855246	0.0239514	0.170635	0.920953
BCL2L10	19.4623	0.000122587	0.0226148	0.919384	0.999997
BCL2L11	1503.54	-0.0165972	0.0297979	0.0568743	0.786965
BCL2L12	815.794	-0.00734624	0.0235307	0.211142	0.941439
BCL2L13	2309.85	0.00210558	0.0218872	0.689094	0.999997
BCL2L14	63.494	0.00217713	0.0227671	0.0888443	0.841352
BCL2L15	19.1938	-0.00124634	0.0226615	0.335017	0.980638
BCL2L2	635.932	0.00372799	0.0224965	0.455617	0.994513
BCL3	4358.14	0.00346556	0.0228391	0.241302	0.95206
BCL6	20631.1	0.00959813	0.0252046	0.0425847	0.744562
BCL6B	861.694	-0.00845737	0.0246833	0.0317272	0.686665
BCL7A	677.797	-0.00589855	0.0232411	0.217194	0.942957
BCL7B	1254	0.00162637	0.0220444	0.639377	0.999997
BCL7C	1731.06	0.0047489	0.0224574	0.432888	0.990497
BCL9	7158.52	0.00230133	0.0224589	0.559271	0.999557
BCL9L	15179	0.00424363	0.0224	0.463959	0.995946
BCLAF1	10637.5	-0.00549532	0.0216341	0.508678	0.998781
BCMO1	27.0306	0.0012354	0.0226604	0.342757	0.980638
BCO2	696.424	-0.000105053	0.0224579	0.969864	0.999997
BCOR	32556.7	0.00872147	0.0239131	0.197038	0.92994
BCORL1	19669.5	0.117006	0.0858993	0.0041659	0.334644
BCR	44055.6	0.00438425	0.0226339	0.392805	0.988506
BCRP3	225.732	-0.00333457	0.0226955	0.450344	0.993826
BCS1L	1416.98	-0.00447399	0.0222544	0.391364	0.987645
BDH1	1618.73	0.00287585	0.0225554	0.465019	0.996177
BDH2	986.784	0.00200805	0.0224281	0.605694	0.999997
BDKRB1	71.2019	-0.00090163	0.0224476	0.70093	0.999997
BDKRB2	393.764	0.000199183	0.0224493	0.960759	0.999997
BDNF	28.6866	-0.00158353	0.0227008	0.172382	0.921626
BDNF-AS	41.2451	0.000632872	0.0225563	0.766838	0.999997
BDP1	15278	-0.013596	0.0266928	0.103185	0.862332
BEAN1	49.9502	-0.00538084	0.0235023	0.0153421	0.546727
BECN1	4172.63	0.00376645	0.0215203	0.623699	0.999997
BEGAIN	100.414	0.00209951	0.0226906	0.321449	0.97596
BEND2	5.5311	-0.000188192	0.0226501	0.522863	0.999461
BEND3	756.283	-0.00289556	0.0226316	0.386445	0.986195
BEND4	19.6112	0.000860463	0.0226541	0.360349	0.981307
BEND5	129.85	-0.00192281	0.0226021	0.476287	0.997
BEND6	127.876	-0.00359177	0.0229301	0.144941	0.90965
BEND7	860.72	6.03323e-05	0.0223914	0.986767	0.999997
BEST1	323.487	-0.000628174	0.0224363	0.840922	0.999997
BEST2	2.51387	0.00043994	0.0226546	0.214111	0.94277
BEST3	40.4314	0.0013558	0.0226617	0.358547	0.980696
BEST4	29.564	-0.00198462	0.0227113	0.249507	0.953553
BET1	846.329	-0.00139718	0.0221805	0.767272	0.999997
BET1L	604.04	-0.00148216	0.0219167	0.795263	0.999997
BEX1	262.367	0.00162835	0.022664	0.364943	0.984078
BEX2	670.084	0.0052288	0.0233505	0.0771486	0.827413
BEX4	610.352	0.00818573	0.0243346	0.0875518	0.839172
BEX5	58.2672	0.344445	0.268834	0.00309883	0.292372
BFAR	2640.58	-0.00248099	0.0217015	0.725771	0.999997
BFSP1	174.843	0.00141221	0.0220798	0.803557	0.999997
BFSP2	16.4031	-0.00202019	0.0227294	0.203686	0.935078
BGLAP	13.2819	0.00105555	0.0226307	0.504087	0.997423
BGN	35003.3	-0.00327619	0.0228362	0.216779	0.942957
BHLHA15	765.001	0.00152248	0.0225758	0.549602	0.999461
BHLHB9	380.816	0.0015678	0.0220957	0.70955	0.999997
BHLHE22	57.5272	0.000881373	0.0226482	0.402608	0.988558
BHLHE40	9619.77	0.000809255	0.0222596	0.847528	0.999997
BHLHE40-AS1	132.467	0.000512922	0.0223894	0.881794	0.999997
BHLHE41	1470.9	-0.00156346	0.0224235	0.648658	0.999997
BHMT	1426.09	0.000324607	0.0226444	0.58765	0.999997
BHMT2	983.007	0.000560641	0.0225899	0.743962	0.999997
BICC1	2649.74	-0.00202609	0.0226453	0.402923	0.988558
BICD1	2152.6	-0.00423273	0.0228024	0.319836	0.97565
BICD2	3697.15	0.00103388	0.022245	0.811862	0.999997
BID	783.458	-0.00585849	0.0231018	0.255693	0.95596
BIK	210.798	0.0010634	0.0225444	0.668659	0.999997
BIN1	1301.22	-0.00172596	0.0224918	0.600409	0.999997
BIN2	1412.84	-0.000927684	0.022553	0.683943	0.999997
BIN3	524.29	-0.00151606	0.0222284	0.739485	0.999997
BIRC2	4366.56	-0.0130125	0.0268024	0.0784091	0.82873
BIRC3	2416.46	0.00267779	0.0227698	0.225914	0.947261
BIRC5	901.935	-0.000339447	0.0224239	0.912654	0.999997
BIRC6	47711.2	-0.00597168	0.0192866	0.63487	0.999997
BIRC7	41.9268	0.0043192	0.0232111	0.00708591	0.42217
BIVM	109.408	-0.00501777	0.0232234	0.130869	0.898061
BLCAP	1521.5	0.00115309	0.0217955	0.842283	0.999997
BLID	54.6119	-0.00153178	0.0226879	0.231687	0.950292
BLK	190.326	0.000152244	0.0225922	0.927405	0.999997
BLM	2154.43	-0.00166742	0.0223232	0.690839	0.999997
BLMH	1654.17	0.00306976	0.0220587	0.596524	0.999997
BLNK	1655.05	-0.00102613	0.0225069	0.707703	0.999997
BLOC1S1	187.188	0.00159835	0.022463	0.769753	0.999997
BLOC1S2	1034.74	0.00373047	0.0226416	0.39724	0.988558
BLOC1S3	306.819	0.00421428	0.0226166	0.433839	0.990497
BLOC1S4	360.976	0.00345095	0.0220847	0.575865	0.999997
BLOC1S5	21.5741	-0.00110911	0.0226303	0.511549	0.999132
BLOC1S6	969.06	-0.00309901	0.0223155	0.547908	0.999461
BLVRA	806.314	0.00174857	0.0222615	0.701114	0.999997
BLVRB	2509.4	0.277803	0.100027	0.000172947	0.0768728
BLZF1	2424.25	-0.00104247	0.0217376	0.86541	0.999997
BMF	485.581	-0.000474007	0.0221605	0.916987	0.999997
BMI1	55.4254	-0.00329154	0.0228908	0.13956	0.904562
BMP1	8030.21	-0.00904762	0.0250508	0.0208038	0.610675
BMP10	18.4741	-0.000772494	0.022663	0.23303	0.950537
BMP2	161.224	-0.00203646	0.0226898	0.313972	0.97444
BMP2K	6746.61	-0.00538859	0.0231816	0.198599	0.930325
BMP3	7.10598	-8.127e-05	0.0226472	0.866789	0.999997
BMP4	505.821	-0.00157088	0.022579	0.536339	0.999461
BMP5	145.091	-0.00138583	0.0226763	0.267112	0.957871
BMP6	745.254	-0.00312249	0.0227853	0.266157	0.957539
BMP7	161.106	4.07243e-05	0.0225884	0.97989	0.999997
BMP8A	652.39	-0.00176005	0.0226514	0.389743	0.986612
BMP8B	548.521	-0.00115848	0.0225357	0.654414	0.999997
BMPER	122.554	-0.000746791	0.0226082	0.641085	0.999997
BMPR1A	3286.98	-0.00655449	0.0224301	0.389024	0.986229
BMPR1B	10499.9	0.000793463	0.0226012	0.643101	0.999997
BMPR2	11644.5	-0.00213181	0.0219671	0.712786	0.999997
BMS1	9346.23	0.00106154	0.021336	0.883905	0.999997
BMS1P20	2267.49	-0.00342555	0.0223577	0.514036	0.999461
BMX	96.3604	-0.000299194	0.0226089	0.821089	0.999997
BNC1	134.633	-0.000471475	0.0226438	0.520646	0.999461
BNC2	1285.14	-0.0026325	0.0227687	0.218105	0.943298
BNIP1	261.498	-0.00221328	0.0222306	0.652088	0.999997
BNIP2	3778.89	-0.00242959	0.0218367	0.700212	0.999997
BNIP3	2265.04	0.00139832	0.0225265	0.622347	0.999997
BNIP3L	2502.39	0.00385047	0.0225052	0.595847	0.999997
BNIPL	612.191	0.00327407	0.0227617	0.307274	0.971406
BOC	3253.13	-0.00191843	0.0226789	0.325595	0.978448
BOD1	1649	0.00229728	0.0222573	0.636798	0.999997
BOD1L1	12331.7	-0.00625412	0.0222459	0.399667	0.988558
BOK	662.052	-0.00312567	0.0227943	0.260106	0.957046
BOLA1	555.948	-0.00297571	0.0220732	0.586938	0.999997
BOLA2	743.353	-0.00729163	0.0236817	0.163632	0.916743
BOLA3	483.47	0.00181114	0.0225003	0.586077	0.999997
BOP1	1898.18	0.000715477	0.022076	0.915382	0.999997
BORA	1306.93	-0.0036662	0.0225908	0.420514	0.988558
BPGM	666.166	0.00196101	0.0224039	0.623136	0.999997
BPHL	1047.88	0.00925182	0.0244135	0.144234	0.909012
BPI	99.8316	0.00142386	0.0226457	0.418823	0.988558
BPIFB1	67.3904	0.000934302	0.0226393	0.473824	0.996784
BPIFB2	52.6407	-0.000496918	0.0226354	0.623918	0.999997
BPIFB4	3.93551	-0.00023196	0.0226514	0.538161	0.999461
BPIFC	21.7848	9.41713e-05	0.0226511	0.615868	0.999997
BPNT1	2086.24	0.00471155	0.0225111	0.421575	0.988558
BPTF	32766.6	-0.000613796	0.0216484	0.922426	0.999997
BRAF	25706.4	0.00412111	0.0222466	0.503308	0.997423
BRAP	1536.38	-0.00729396	0.0222926	0.370106	0.984284
BRAT1	2278.46	-0.00205484	0.0220883	0.701013	0.999997
BRCA1	28709.2	-0.00259452	0.0224355	0.542675	0.999461
BRCA2	24782.3	-0.00369855	0.0226008	0.414887	0.988558
BRCC3	1667.65	-0.00378659	0.0220759	0.561383	0.999997
BRD1	6691.63	-0.00227171	0.0217912	0.721392	0.999997
BRD2	22342.7	0.00530277	0.0227125	0.362581	0.982498
BRD3	4564.98	-0.000327135	0.0216991	0.972615	0.999997
BRD4	15897.7	0.00620995	0.0227649	0.331397	0.979921
BRD7	4054.48	-0.00157904	0.0218972	0.785476	0.999997
BRD8	3857.28	-0.0176944	0.0310231	0.0465046	0.759006
BRD9	3012.42	-0.00962533	0.0249086	0.0656636	0.809309
BRDT	21.1341	0.000398281	0.0226441	0.582187	0.999997
BRE	2280.57	0.13748	0.0332565	1.06302e-06	0.00303751
BRE-AS1	9.25982	-5.27636e-06	0.0226155	0.995833	0.999997
BRF1	2621.5	-0.00420438	0.0225388	0.485454	0.997044
BRF2	1269.13	0.00191417	0.0220111	0.731921	0.999997
BRI3	4812.61	0.00292661	0.0224094	0.530621	0.999461
BRI3BP	1382.79	-0.00330038	0.0225324	0.454613	0.994513
BRICD5	227.561	-0.00142982	0.0224337	0.681402	0.999997
BRINP1	32.9908	-0.000157991	0.0226088	0.90438	0.999997
BRINP2	66.4661	0.00135478	0.0226559	0.387445	0.986195
BRINP3	8653.4	-0.000604439	0.0226557	0.260813	0.957046
BRIP1	16375.7	-0.000813503	0.0223723	0.818498	0.999997
BRIX1	2901.29	6.14167e-05	0.0221985	0.989751	0.999997
BRK1	3549.61	0.00302955	0.022215	0.573409	0.999997
BRMS1	1381.16	-0.012751	0.0257959	0.133269	0.899635
BRMS1L	580.577	-0.00422359	0.0225564	0.398705	0.988558
BROX	4763.82	-0.00118499	0.0222166	0.791135	0.999997
BRPF1	2628.87	-0.00510363	0.0213475	0.531457	0.999461
BRPF3	6208.33	0.0080077	0.0240023	0.145476	0.910255
BRSK1	1683.51	0.265069	0.114051	0.000513902	0.12237
BRSK2	806.163	0.00220728	0.0227051	0.29932	0.969363
BRWD1	23133.6	-0.00238305	0.0218978	0.69662	0.999997
BRWD1-IT2	48.6686	-0.000479497	0.0226129	0.726531	0.999997
BRWD3	7676.17	0.00109654	0.0216591	0.864963	0.999997
BSCL2	85.1035	-0.00382875	0.0228433	0.276212	0.961312
BSDC1	3126.68	0.00817855	0.0235648	0.233422	0.950537
BSG	10565	0.00393886	0.0223745	0.483479	0.997044
BSN	1769.82	0.000135914	0.0223676	0.970084	0.999997
BSND	2.47957	0.00043667	0.0226532	0.357906	0.980638
BSPRY	1333.33	0.00822225	0.0245765	0.0306053	0.68246
BST1	291.045	-0.000583838	0.0223643	0.919275	0.999997
BST2	8111.28	0.00285176	0.022742	0.297047	0.969363
BTAF1	12982.3	-0.00659309	0.0228425	0.33016	0.979921
BTBD1	3705.09	0.00179016	0.0220378	0.742577	0.999997
BTBD10	2240.55	-0.0181686	0.0290425	0.0887396	0.841352
BTBD11	236.657	0.000328989	0.0223777	0.801036	0.999997
BTBD16	75.4021	0.00021434	0.0226164	0.850417	0.999997
BTBD17	14.1468	5.62654e-05	0.0226476	0.892597	0.999997
BTBD19	1338.75	-0.0059883	0.0236288	0.0464453	0.759006
BTBD2	4706.47	0.00163023	0.0216285	0.806383	0.999997
BTBD3	2067.02	-0.00798823	0.0239018	0.165455	0.917267
BTBD6	2609.85	-0.00380876	0.0223916	0.483845	0.997044
BTBD7	4138.27	-0.0166334	0.030093	0.0481426	0.759006
BTBD8	239.725	-0.0176243	0.0320981	0.0235669	0.62817
BTBD9	1983.74	-0.00418373	0.0225549	0.476253	0.997
BTC	248.865	0.00596059	0.0236688	0.0254457	0.640207
BTD	846.382	-0.00866876	0.0240371	0.175593	0.924755
BTF3	7051.82	0.00419601	0.0227588	0.342046	0.980638
BTF3L4	1302.11	0.000418501	0.0211078	0.908834	0.999997
BTG1	2705.54	0.00468865	0.0230147	0.226888	0.947401
BTG2	3467.71	0.0026045	0.0227002	0.337396	0.980638
BTG3	1216.53	0.00422785	0.0229218	0.247377	0.952605
BTG4	2.80181	0.000493659	0.0226548	0.283408	0.964516
BTK	6400.59	-0.0031389	0.0228176	0.221833	0.944405
BTLA	124.821	0.00185351	0.0227084	0.219398	0.94364
BTN1A1	4.7588	0.000662825	0.02265	0.429168	0.990107
BTN2A1	2996.59	-0.00548427	0.0223637	0.42673	0.988558
BTN2A2	1330.59	0.00584855	0.023377	0.153002	0.912482
BTN2A3P	241.114	0.000277153	0.0224871	0.918188	0.999997
BTN3A1	3968.05	0.00233766	0.0225256	0.516386	0.999461
BTN3A2	2380.21	0.00401143	0.0227773	0.328187	0.979347
BTN3A3	2598.2	0.000644961	0.0223255	0.866736	0.999997
BTNL10	41.6498	0.000912165	0.0226661	0.256032	0.95596
BTNL2	2.45477	-0.000142653	0.0226473	0.784048	0.999997
BTNL8	15.0406	-0.00075559	0.0226516	0.377325	0.986195
BTNL9	484.212	0.000326215	0.0226031	0.823791	0.999997
BTRC	1961.11	4.18562e-05	0.0199347	0.981655	0.999997
BUB1	3851.97	-0.00314141	0.0226961	0.359213	0.980698
BUB1B	2440	-0.00207562	0.0224828	0.565552	0.999997
BUB3	5411.12	0.00196821	0.0222941	0.663476	0.999997
BUD13	1354.08	-0.00706548	0.0221862	0.394123	0.988558
BUD31	1711.31	0.00291893	0.0221507	0.574876	0.999997
BVES	221.645	-0.00402413	0.023007	0.143844	0.908998
BVES-AS1	7.67628	0.000899469	0.0226604	0.279644	0.9639
BYSL	1388.43	-0.00114119	0.0218092	0.848219	0.999997
BZRAP1	2613.33	-0.000636968	0.0224619	0.826587	0.999997
BZRAP1-AS1	198.663	0.000621423	0.0225094	0.81038	0.999997
BZW1	8339	-0.00349229	0.0224765	0.471797	0.996722
BZW2	3268.41	0.00299529	0.0224631	0.569495	0.999997
C10orf10	2062.4	0.00578398	0.023651	0.00894074	0.4524
C10orf105	4.95502	0.000126363	0.0226315	0.89053	0.999997
C10orf107	30.6943	-0.00115591	0.0226639	0.2969	0.969363
C10orf11	373.782	-0.00268025	0.0226199	0.425902	0.988558
C10orf111	29.4052	-0.00256103	0.0228006	0.12886	0.897707
C10orf113	351.988	0.000209341	0.0225513	0.870239	0.999997
C10orf115	4.25523	1.1088e-05	0.0226508	0.861855	0.999997
C10orf12	1654.67	-0.000296957	0.0216812	0.97082	0.999997
C10orf128	204.514	0.00481268	0.0232533	0.069267	0.812083
C10orf131	79.2828	-0.000913738	0.0225838	0.646977	0.999997
C10orf2	881.327	0.00192007	0.022201	0.715952	0.999997
C10orf25	38.109	-0.00026387	0.0225632	0.891605	0.999997
C10orf32	50.437	-0.00112833	0.0225932	0.583576	0.999997
C10orf35	223.63	0.00290532	0.0226219	0.421536	0.988558
C10orf54	874.437	0.00250004	0.0226342	0.416335	0.988558
C10orf55	14.7086	-0.00316694	0.0229391	0.0218053	0.615362
C10orf62	14.5983	0.000691839	0.0226514	0.378778	0.986195
C10orf67	19.5286	-0.000673131	0.0226498	0.439326	0.991003
C10orf71	27.2694	-0.000292911	0.0226327	0.803926	0.999997
C10orf76	2046.48	-0.00657547	0.0226493	0.360013	0.981217
C10orf82	220.761	-0.00124877	0.0226633	0.329492	0.979646
C10orf85	8.02275	-0.000567208	0.0226477	0.463924	0.995946
C10orf88	810.601	0.000153682	0.0221246	0.974773	0.999997
C10orf90	153.41	0.000774079	0.022641	0.479068	0.997044
C10orf91	37.0772	0.00298512	0.0228372	0.228999	0.947512
C10orf95	19.2503	8.56385e-05	0.02259	0.999776	0.999997
C10orf99	10.9348	5.8155e-07	0.0226513	0.967248	0.999997
C11orf1	734.17	0.00593659	0.0234699	0.119113	0.889017
C11orf16	16.8092	-0.00159707	0.022718	0.0542393	0.780431
C11orf21	175.587	0.0012943	0.0226385	0.436947	0.990703
C11orf24	4079.69	-0.000564102	0.0219499	0.916378	0.999997
C11orf30	5028.94	-0.000951095	0.0219551	0.709826	0.999997
C11orf31	1819.74	-0.00297491	0.0222309	0.580227	0.999997
C11orf45	51.5402	0.000373756	0.0224971	0.882002	0.999997
C11orf48	1015.84	-0.0168945	0.0289075	0.0835314	0.835366
C11orf49	1095.26	0.00359223	0.0223193	0.516004	0.999461
C11orf53	2.24901	-3.12182e-05	0.0226507	0.865272	0.999997
C11orf54	1596.14	0.000316104	0.0216798	0.960325	0.999997
C11orf57	894.157	-0.00200104	0.0223038	0.654686	0.999997
C11orf58	4243.14	-0.00373095	0.0222674	0.518939	0.999461
C11orf63	697.521	-0.00167408	0.0224599	0.628863	0.999997
C11orf65	118.883	-0.00127802	0.0222183	0.758479	0.999997
C11orf68	1262.21	-0.0171871	0.0298062	0.0671706	0.811258
C11orf70	93.492	-0.00019223	0.0225299	0.931955	0.999997
C11orf71	222.748	0.00599092	0.0234522	0.147552	0.912279
C11orf73	855.679	-3.42046e-05	0.0219131	0.996102	0.999997
C11orf74	577.813	0.00251728	0.0224941	0.522252	0.999461
C11orf80	2488.85	-0.00364614	0.022548	0.438572	0.990717
C11orf83	914.002	-0.00238964	0.0222034	0.642463	0.999997
C11orf84	1681.66	0.00176728	0.0222349	0.705543	0.999997
C11orf85	45.4466	0.00200075	0.0227177	0.237807	0.952012
C11orf86	6.2066	-0.000319491	0.0226509	0.56375	0.999997
C11orf88	6.6603	0.00027472	0.0226504	0.511426	0.999132
C11orf91	25.2714	-0.000513308	0.0225901	0.76924	0.999997
C11orf94	49.4475	-0.00090288	0.0225916	0.636619	0.999997
C11orf95	954.689	-0.000293892	0.0220414	0.94313	0.999997
C11orf96	920.849	0.00349628	0.0229011	0.168599	0.920263
C12orf10	1267.11	0.00281289	0.0220373	0.635231	0.999997
C12orf29	1365.71	-0.000142517	0.0220408	0.976689	0.999997
C12orf4	1913.37	-0.0110484	0.0252935	0.11778	0.889017
C12orf42	39.4015	0.00081415	0.022651	0.37256	0.984284
C12orf43	386.616	0.00218599	0.0219874	0.705748	0.999997
C12orf45	425.618	-0.00509014	0.0220292	0.489172	0.997044
C12orf49	1393.76	0.00157685	0.0223598	0.69258	0.999997
C12orf5	381.879	-0.00395221	0.0220751	0.543281	0.999461
C12orf50	2.19188	-3.72641e-05	0.0226462	0.923925	0.999997
C12orf54	4.17774	0.000136682	0.02263	0.881042	0.999997
C12orf55	603.155	-0.000426174	0.0225971	0.779977	0.999997
C12orf56	27.7683	0.00231347	0.0227972	0.038066	0.712992
C12orf57	3166.75	0.0104924	0.0253802	0.0828017	0.835366
C12orf60	60.1489	0.000868806	0.0225049	0.720171	0.999997
C12orf61	30.6368	-0.00470468	0.0232802	0.0289042	0.673282
C12orf65	277.244	0.00112086	0.0222159	0.803644	0.999997
C12orf66	564.381	0.00341051	0.022115	0.606154	0.999997
C12orf73	263.979	-0.0068717	0.0235946	0.167719	0.919899
C12orf74	12.8713	0.000572232	0.0226274	0.6387	0.999997
C12orf75	588.921	-2.19658e-05	0.0224237	0.993186	0.999997
C12orf76	176.061	-0.00733913	0.0237324	0.255078	0.955776
C12orf77	3.11647	-0.000325541	0.0226494	0.5602	0.999997
C12orf79	15.2252	0.000960783	0.0226313	0.516272	0.999461
C14orf1	506.85	0.00382079	0.0227114	0.361619	0.981824
C14orf105	164.934	-0.000489741	0.0225924	0.792493	0.999997
C14orf119	1084.53	0.00291305	0.0223517	0.551853	0.999461
C14orf132	132.864	-0.0015669	0.0225867	0.531105	0.999461
C14orf142	256.71	-0.00334171	0.0224262	0.498286	0.997336
C14orf159	2677.42	-0.00259484	0.0222654	0.595868	0.999997
C14orf166	5235.25	0.00361786	0.022635	0.401667	0.988558
C14orf169	1526.5	0.0029819	0.0216807	0.669155	0.999997
C14orf178	6.89538	-0.000768652	0.0226414	0.492832	0.997044
C14orf180	12.3038	0.00113092	0.0226855	0.0495142	0.763008
C14orf182	65.7807	0.00505461	0.0233438	0.0510473	0.77139
C14orf183	131.254	-0.0012376	0.022573	0.595234	0.999997
C14orf2	2304.75	0.00223534	0.0224221	0.583844	0.999997
C14orf28	309.618	-0.0119441	0.0266447	0.0468173	0.759006
C14orf37	238.159	-0.00519256	0.023403	0.0352413	0.708192
C14orf39	96.3576	-0.00352375	0.0229116	0.167613	0.919899
C14orf64	28.0129	0.00250134	0.0228083	0.0814675	0.833438
C14orf79	611.982	-0.00470125	0.0230341	0.215532	0.942957
C14orf80	656.763	-0.00824005	0.0243684	0.078723	0.828807
C14orf93	513.562	0.00860052	0.0237746	0.183366	0.926889
C15orf26	32.1285	0.000441078	0.0225462	0.84303	0.999997
C15orf27	28.9424	0.000257892	0.0225655	0.895605	0.999997
C15orf37	57.281	0.00133878	0.02255	0.612029	0.999997
C15orf38	247.38	0.00421788	0.0228685	0.283707	0.964516
C15orf39	6649.86	0.00983765	0.0251841	0.0645369	0.80832
C15orf40	375.303	0.00359464	0.0224857	0.466292	0.996722
C15orf41	327.732	0.000473604	0.0220312	0.92702	0.999997
C15orf43	2.77856	4.11893e-05	0.0226511	0.837002	0.999997
C15orf48	224.33	0.00188418	0.0226459	0.406077	0.988558
C15orf52	2152.23	0.00711121	0.02401	0.0546086	0.78105
C15orf53	9.12503	-2.47091e-05	0.0226315	0.975623	0.999997
C15orf54	3.69046	0.000630058	0.0226494	0.425311	0.988558
C15orf56	7.18224	0.00164523	0.0227072	0.184695	0.926889
C15orf57	360.375	-0.00167844	0.0217742	0.787816	0.999997
C15orf59	162.582	-0.00227406	0.0226656	0.376796	0.986195
C15orf61	587.079	0.001176	0.0224052	0.739727	0.999997
C15orf62	34.2948	0.00326751	0.0229464	0.0382342	0.712992
C15orf65	157.474	6.56457e-05	0.0224082	0.984814	0.999997
C16orf13	1359.28	0.00618542	0.0228889	0.32245	0.976165
C16orf45	540.766	-0.00115691	0.0226037	0.550456	0.999461
C16orf46	298.326	-0.00387046	0.0227105	0.384228	0.986195
C16orf47	9.32849	-0.000335333	0.0226223	0.773764	0.999997
C16orf54	95.9153	0.0013301	0.0226213	0.492135	0.997044
C16orf58	4233.49	-0.00124535	0.0213539	0.862133	0.999997
C16orf59	569.933	0.000153492	0.0222656	0.970754	0.999997
C16orf62	4651.96	0.0159075	0.0279674	0.0973525	0.851146
C16orf70	1545.39	0.00162726	0.0218315	0.788549	0.999997
C16orf71	84.2044	-0.00269899	0.0227489	0.274777	0.960604
C16orf72	3806.72	0.00506621	0.0225668	0.400377	0.988558
C16orf74	107.133	-0.00183379	0.0225236	0.558788	0.999461
C16orf80	937.769	-0.00146734	0.0217809	0.811023	0.999997
C16orf86	123.546	-0.00417336	0.0229419	0.225483	0.946608
C16orf87	547.312	-0.00557347	0.022848	0.327801	0.979347
C16orf89	62.4424	-0.000917721	0.0226465	0.426452	0.988558
C16orf90	1.82865	-8.32706e-05	0.0226508	0.830556	0.999997
C16orf91	563.968	-0.00156324	0.0221573	0.951784	0.999997
C16orf93	361.6	-0.0073399	0.0239989	0.0861797	0.835986
C16orf95	125.723	-0.00190133	0.0223474	0.653202	0.999997
C16orf96	27.0118	-0.00679617	0.0240742	0.00438377	0.339861
C17orf100	75.1978	0.00675144	0.023612	0.146624	0.912279
C17orf102	2.40391	0.000312844	0.0226511	0.396833	0.988558
C17orf104	69.1829	-0.000134602	0.0226149	0.919221	0.999997
C17orf105	2.19378	0.000228061	0.022644	0.700524	0.999997
C17orf107	406.001	0.00339109	0.0222373	0.548821	0.999461
C17orf47	41.5237	0.00214025	0.0227828	0.0182524	0.578953
C17orf50	5.09882	-0.000422785	0.0226484	0.520606	0.999461
C17orf51	96.1511	-0.00326337	0.0228045	0.261423	0.957046
C17orf53	580.137	-0.00238203	0.0223563	0.605551	0.999997
C17orf58	433.292	0.00398556	0.0225812	0.417536	0.988558
C17orf59	460.091	0.00738543	0.0232769	0.264305	0.957046
C17orf62	3861.94	0.00233623	0.0218824	0.720559	0.999997
C17orf67	410.187	-0.00645539	0.0233836	0.202129	0.934278
C17orf70	2728.39	-0.00603596	0.0228813	0.322281	0.976165
C17orf74	8.136	0.00115548	0.0226801	0.153073	0.912482
C17orf75	800.696	0.005327	0.022516	0.405541	0.988558
C17orf77	29.6683	2.88143e-05	0.0226513	0.862992	0.999997
C17orf80	1776.72	0.00213567	0.0215836	0.756839	0.999997
C17orf82	59.2173	0.00204228	0.0226757	0.356685	0.980638
C17orf85	2268.21	-0.0199168	0.0344	0.0346668	0.706835
C17orf89	236.757	0.0045727	0.0228928	0.292286	0.969363
C17orf96	187.858	0.00623003	0.0237855	0.0178304	0.578013
C17orf97	1626.26	-0.00196426	0.0225343	0.60277	0.999997
C17orf98	3.57181	0.000404488	0.0226483	0.432145	0.990497
C17orf99	4.1748	0.000219025	0.0226356	0.802911	0.999997
C18orf21	888.004	-0.0046711	0.0227422	0.340835	0.980638
C18orf25	903.556	-0.0039124	0.0223266	0.495513	0.997044
C18orf32	9.94008	-0.00314703	0.0229126	0.0785714	0.828807
C18orf54	1232	-0.00347023	0.0228632	0.213501	0.94277
C18orf8	2153.6	-0.00739625	0.0231747	0.279542	0.9639
C19orf10	3290.02	-0.00121641	0.0219957	0.737337	0.999997
C19orf12	951.663	-0.00283039	0.0223537	0.556017	0.999461
C19orf18	91.565	-0.00128248	0.0225611	0.604477	0.999997
C19orf24	1186.68	-0.000623068	0.0222134	0.886044	0.999997
C19orf25	605.5	0.000212722	0.0220248	0.973691	0.999997
C19orf26	294.782	0.00646642	0.0236363	0.113327	0.884111
C19orf33	545.21	0.00119703	0.0225957	0.560743	0.999997
C19orf35	40.019	0.00147364	0.0226637	0.349361	0.980638
C19orf38	163.087	0.00722736	0.024159	0.0244977	0.635645
C19orf40	210.612	-0.00380777	0.0226651	0.385207	0.986195
C19orf43	5558.99	-0.00181474	0.0210661	0.789772	0.999997
C19orf44	824.254	0.0146623	0.0277304	0.0964455	0.851146
C19orf45	71.3258	0.00695824	0.0241312	0.0060054	0.388738
C19orf47	1436.4	0.00453634	0.0219198	0.53158	0.999461
C19orf48	1957.47	0.00486554	0.0224502	0.430892	0.990497
C19orf52	331.332	-0.00392844	0.0221212	0.539618	0.999461
C19orf53	1674.06	0.00290578	0.0221872	0.597216	0.999997
C19orf54	651.089	0.00471437	0.0226965	0.381191	0.986195
C19orf57	300.058	0.00373435	0.0227574	0.332502	0.979921
C19orf60	806.438	-0.0070884	0.023273	0.159542	0.913346
C19orf66	3774.82	0.00646248	0.0231484	0.268502	0.958191
C19orf67	10.1473	-0.000801829	0.0226371	0.513388	0.999461
C19orf68	638.14	0.00708845	0.0229863	0.308232	0.972437
C19orf70	856.391	0.00116541	0.0217393	0.841644	0.999997
C19orf71	637.733	0.00419168	0.022896	0.263021	0.957046
C19orf73	62.7471	0.000888142	0.0225466	0.701384	0.999997
C19orf80	101.148	0.000839325	0.0226464	0.443491	0.991048
C19orf81	19.1087	-0.000796749	0.0226373	0.522128	0.999461
C19orf82	92.6069	-0.00153426	0.0222916	0.738639	0.999997
C19orf83	73.4013	0.00136212	0.0225472	0.606432	0.999997
C19orf84	9.77769	0.00189086	0.0227247	0.173568	0.921626
C1D	615.795	-0.00165686	0.0222096	0.724833	0.999997
C1GALT1	2483.26	-0.0064408	0.0231074	0.172105	0.921626
C1GALT1C1	1550.03	-0.0012048	0.0220347	0.817503	0.999997
C1orf101	303.452	-0.00724252	0.0240367	0.0623028	0.799672
C1orf105	12.8936	0.00246979	0.02283	0.0144425	0.539118
C1orf106	1461.16	0.00573498	0.0235497	0.0457979	0.75402
C1orf109	363.815	-0.00629221	0.0229595	0.351564	0.980638
C1orf110	3.54789	-0.000161381	0.0226502	0.682592	0.999997
C1orf112	3335.02	-0.00738207	0.0231211	0.287664	0.96625
C1orf115	359.317	0.0044953	0.0230411	0.189402	0.928968
C1orf116	1257.46	0.00380072	0.0230495	0.0365255	0.712018
C1orf122	455.408	0.00355283	0.0226893	0.368937	0.984284
C1orf123	584.994	-0.00237506	0.0220173	0.597647	0.999997
C1orf127	93.0283	-0.00345598	0.0229161	0.141309	0.90579
C1orf131	844.692	-0.0133792	0.0267883	0.0921817	0.845826
C1orf145	102.806	0.000804151	0.0225175	0.745951	0.999997
C1orf158	2.02716	-1.68308e-05	0.0226513	0.957567	0.999997
C1orf159	733.621	-0.0024315	0.0222712	0.617777	0.999997
C1orf162	607.188	-0.00012807	0.02255	0.948422	0.999997
C1orf167	48.2496	0.00452594	0.0232237	0.0355232	0.709043
C1orf168	367.405	-0.0023946	0.022753	0.214883	0.94277
C1orf174	680.715	-0.0111128	0.0247231	0.166268	0.918129
C1orf177	28.6459	0.0013301	0.022642	0.473173	0.996722
C1orf185	2.08191	-0.000145881	0.0226475	0.731913	0.999997
C1orf186	217.012	0.000427014	0.0225848	0.80802	0.999997
C1orf189	45.153	-0.000870597	0.0225648	0.683454	0.999997
C1orf192	21.0827	-9.90767e-05	0.0226324	0.909555	0.999997
C1orf194	26.5566	0.00109129	0.0226662	0.276997	0.961965
C1orf195	2.14611	-0.00026839	0.0226473	0.63546	0.999997
C1orf198	5568.64	-0.000186272	0.0222611	0.962262	0.999997
C1orf200	2.87435	0.000152621	0.0226415	0.814261	0.999997
C1orf204	75.2086	-0.00227701	0.0226204	0.438805	0.990717
C1orf21	1978.91	0.00188808	0.0225861	0.497727	0.997336
C1orf210	238.512	0.00450152	0.0229595	0.246474	0.952301
C1orf213	64.3562	0.00083149	0.0225448	0.736445	0.999997
C1orf216	393.871	0.0055247	0.0229844	0.290112	0.968323
C1orf220	96.0277	-0.00610785	0.0237398	0.0182641	0.578953
C1orf226	376.398	-0.00102439	0.022395	0.770699	0.999997
C1orf228	346.456	-0.00711633	0.023945	0.0754978	0.824895
C1orf229	13.3951	0.000241076	0.0226212	0.833242	0.999997
C1orf233	187.889	0.00374263	0.0228359	0.275386	0.960784
C1orf234	5.55582	-3.53524e-05	0.0226301	0.968439	0.999997
C1orf27	2435.15	-0.0128075	0.0250977	0.148614	0.912279
C1orf35	977.917	-0.00720432	0.0236928	0.170069	0.92074
C1orf43	7413.6	0.00420065	0.0226726	0.380388	0.986195
C1orf50	353.443	-0.00162473	0.0220871	0.748767	0.999997
C1orf52	905.405	-0.00567271	0.0228581	0.322308	0.976165
C1orf53	119.483	0.000154788	0.0225323	0.946451	0.999997
C1orf54	422.626	0.00279925	0.0225135	0.49344	0.997044
C1orf56	743.239	0.00116873	0.0223177	0.758544	0.999997
C1orf61	22.2953	0.00146944	0.0226844	0.24705	0.952301
C1orf64	230.852	0.000457998	0.0226295	0.678018	0.999997
C1orf68	123.454	5.70082e-05	0.0226515	1.43755e-06	0.00359423
C1orf74	314.239	0.00376159	0.0225964	0.428374	0.989758
C1orf85	2676.79	0.0054415	0.0230351	0.26613	0.957539
C1orf86	1737.95	0.00681673	0.0230457	0.296376	0.969363
C1orf94	57.5144	-0.000924487	0.0226614	0.300477	0.969363
C1orf95	99.3214	0.00313306	0.0229319	0.0199332	0.60531
C1QA	5167.41	0.00488755	0.0232481	0.0874249	0.839094
C1QB	7518.38	0.00334232	0.0228611	0.19589	0.929557
C1QBP	2467.18	0.000201987	0.0218704	0.935502	0.999997
C1QC	10735.5	0.00293506	0.0227625	0.276894	0.961892
C1QL1	183.408	0.00202156	0.0226563	0.389316	0.986334
C1QL2	117.403	-0.000621956	0.0226525	0.388522	0.986195
C1QL3	9.57033	-0.000123378	0.0226301	0.894766	0.999997
C1QL4	92.9046	0.00040133	0.0226267	0.70372	0.999997
C1QTNF1	862.075	-0.00101919	0.0225686	0.642202	0.999997
C1QTNF2	65.0078	0.000218895	0.0225942	0.889242	0.999997
C1QTNF3	132.56	-0.0020778	0.0227018	0.289212	0.967523
C1QTNF4	20.1355	-0.000838224	0.0226322	0.523748	0.999461
C1QTNF6	907.148	-0.00514978	0.0231913	0.168268	0.920247
C1QTNF7	69.5925	-0.000302425	0.0226338	0.71758	0.999997
C1QTNF8	16.2126	3.78222e-06	0.022651	0.962099	0.999997
C1QTNF9	25.6139	-0.00119844	0.0226374	0.4587	0.995397
C1QTNF9B	8.8074	-0.00153795	0.0226997	0.169404	0.920701
C1QTNF9B-AS1	72.2823	-0.000695961	0.0225786	0.733142	0.999997
C1R	18471.8	3.59042e-05	0.0224557	0.992494	0.999997
C1RL	3814.53	0.00751444	0.023638	0.196776	0.929557
C1RL-AS1	154.368	-0.000662622	0.0224642	0.820322	0.999997
C1S	26816	-0.00156112	0.022548	0.572757	0.999997
C2	5997.8	-0.0056036	0.0233693	0.124704	0.893067
C20orf141	2.06851	0.000344952	0.0226495	0.462956	0.995808
C20orf144	5.51107	-0.000182871	0.0226178	0.881758	0.999997
C20orf166	8.52595	0.000469681	0.0226417	0.591827	0.999997
C20orf166-AS1	11	0.000432949	0.0226411	0.585096	0.999997
C20orf194	2706.1	-0.00437326	0.0227229	0.358644	0.980696
C20orf195	43.523	0.00100513	0.0225993	0.602244	0.999997
C20orf196	84.9857	0.000926617	0.0222481	0.857771	0.999997
C20orf197	24.6181	-0.00180898	0.0227006	0.250959	0.953553
C20orf202	6.79902	0.00119488	0.0226696	0.284686	0.964516
C20orf203	13.0612	-3.07819e-05	0.0226221	0.976488	0.999997
C20orf24	63.6454	-0.000180676	0.0223986	0.960525	0.999997
C20orf26	119.539	-0.00326104	0.0228241	0.238705	0.952012
C20orf27	1366.66	0.00566655	0.022709	0.361117	0.981824
C20orf85	8.58561	-2.10741e-05	0.0226513	0.947035	0.999997
C20orf96	1221.15	0.00289101	0.0225095	0.496311	0.997271
C21orf119	57.2191	-0.00038392	0.0225401	0.862614	0.999997
C21orf128	13.1471	-0.000128184	0.0226312	0.901327	0.999997
C21orf2	630.055	-0.00545484	0.0232843	0.152774	0.912482
C21orf33	5883.26	-0.0023068	0.0215312	0.743207	0.999997
C21orf49	65.2585	0.00434761	0.0230625	0.187254	0.928968
C21orf58	656.819	-0.0019692	0.0224085	0.618061	0.999997
C21orf59	2479.48	-9.30912e-06	0.0216336	0.997976	0.999997
C21orf62	2.18002	1.00144e-05	0.0226502	0.95799	0.999997
C21orf67	97.018	0.00633086	0.0236796	0.0782959	0.828611
C21orf88	24.989	-0.000785455	0.0226394	0.537507	0.999461
C21orf90	26.2746	-0.000655319	0.0226319	0.57554	0.999997
C21orf91	903.414	0.000526411	0.022419	0.871027	0.999997
C22orf15	14.147	-0.000464213	0.0226323	0.648972	0.999997
C22orf23	25.9128	-0.00158129	0.0226545	0.388465	0.986195
C22orf24	8.35038	-0.00165346	0.0227028	0.199519	0.931805
C22orf34	390.457	-0.00137268	0.0225795	0.517525	0.999461
C22orf39	310.537	0.000297761	0.0223911	0.940171	0.999997
C22orf46	299.193	0.00585342	0.0232824	0.201855	0.934278
C2CD2	1552.98	-0.000513809	0.0221979	0.906487	0.999997
C2CD2L	1514.55	-0.00633246	0.0232327	0.241078	0.95206
C2CD3	5288.45	-0.00410773	0.0221219	0.525554	0.999461
C2CD4A	22.2637	0.00188392	0.0227289	0.144718	0.90965
C2CD4B	36.3344	0.00108338	0.022633	0.551345	0.999461
C2CD4C	60.9925	0.00466832	0.0232749	0.0257444	0.645937
C2CD4D	177.722	0.0026728	0.02263	0.42034	0.988558
C2CD5	4827	-0.0118715	0.0259885	0.0905446	0.842858
C2orf15	165.117	0.000531661	0.022474	0.833185	0.999997
C2orf16	16.921	-0.000878014	0.0226506	0.390471	0.987157
C2orf27A	800.537	-0.00596419	0.0234803	0.112466	0.883838
C2orf27B	6.7298	-0.000867519	0.0226521	0.410082	0.988558
C2orf40	35.3388	-0.000385821	0.0226461	0.473706	0.996722
C2orf42	680.217	-0.00610926	0.0226666	0.359889	0.981217
C2orf43	655.545	-0.00113863	0.0213256	0.829084	0.999997
C2orf44	394.968	0.0127021	0.0266235	0.150813	0.912279
[truncated: 18,004 more rows]

## Sheet: B_vs_week8_DEgenes
Supplementary Table 5. The results of DE analysis for paired samples between baseline and week 8 performed by DESeq2.
Gene	baseMean	log2FoldChange	lfcSE	pvalue	padj
A1BG	247.44	0.0222899	0.18215	0.814686	0.953796
A1BG-AS1	407.176	0.0378715	0.196639	0.625755	0.885382
A1CF	25.6876	-0.000561268	0.210511	0.9776	0.994171
A2M	57629.4	0.031196	0.199485	0.651213	0.896081
A2M-AS1	72.1394	1.29777	0.563592	0.000615531	0.0251212
A2ML1	312.183	0.00381359	0.208588	0.870853	0.969214
A3GALT2	20.6029	-0.0387148	0.206913	0.49381	0.822542
A4GALT	1698.25	0.0399793	0.177898	0.6754	0.904846
AAAS	1547.37	-0.0128996	0.149758	0.914137	0.977486
AACS	1420.91	-0.203324	0.231036	0.109096	0.467108
AADAC	21.1283	0.00371265	0.207356	0.909823	0.976494
AADAT	429.708	-0.146973	0.247108	0.127042	0.498478
AAED1	984.157	0.032544	0.193894	0.695049	0.912389
AAGAB	1984.44	0.00934996	0.15705	0.931485	0.981797
AAK1	6706.63	0.100571	0.182077	0.352272	0.728828
AAMDC	335.013	-0.147994	0.249775	0.118686	0.484022
AAMP	2756.25	-0.0406235	0.165098	0.710912	0.919696
AAR2	1062.7	-0.0348437	0.148824	0.741761	0.929991
AARD	1904.39	-2.349	1.03326	5.41574e-05	0.00563683
AARS	8426.13	-0.016862	0.168001	0.859073	0.966092
AARS2	2184.13	-0.165949	0.171924	0.159042	0.544419
AASDH	1989.08	-0.0147031	0.150636	0.885579	0.971829
AASDHPPT	1289.33	0.0657303	0.185482	0.510694	0.832451
AASS	1207.86	-0.0338917	0.191722	0.679551	0.905756
AATF	2656.8	0.100622	0.170361	0.35443	0.729504
AATK	783.127	-0.0470414	0.214118	0.194138	0.590601
ABAT	676.32	-0.0173133	0.196619	0.802454	0.949079
ABCA1	16003.5	0.0448648	0.207199	0.439362	0.790434
ABCA10	1118.72	0.0411262	0.202588	0.539806	0.846569
ABCA11P	528.569	-0.000927086	0.19174	0.990218	0.997158
ABCA12	2905.59	-0.113489	0.256493	0.000136353	0.0095888
ABCA13	501.74	0.091116	0.229046	0.11832	0.483572
ABCA2	18512.2	-0.0771413	0.205452	0.357472	0.732637
ABCA3	5800.91	-0.0642315	0.217964	0.166384	0.554062
ABCA4	1114.41	-0.0511377	0.215615	0.143693	0.519472
ABCA5	2668.56	0.0797748	0.173974	0.457301	0.803318
ABCA6	2768.5	0.0678383	0.204095	0.394132	0.759387
ABCA7	6041.75	0.0667721	0.17467	0.525466	0.840051
ABCA8	1126.29	0.0397686	0.211314	0.287562	0.680546
ABCA9	1597.51	0.00053269	0.194777	0.97953	0.994321
ABCB1	943.202	1.06383	0.521721	0.00107837	0.0371259
ABCB10	2598.13	-0.105952	0.193368	0.32726	0.712522
ABCB11	85.2723	-0.0187317	0.202367	0.736495	0.928132
ABCB4	416.531	0.0984268	0.222536	0.212992	0.611271
ABCB5	222.053	0.0449221	0.216594	0.0126833	0.15956
ABCB6	1218.34	-0.15262	0.258625	0.0949806	0.443668
ABCB7	2558.13	0.0349785	0.164065	0.736863	0.928132
ABCB8	2507.93	-0.326816	0.428784	0.0270919	0.241409
ABCB9	690.124	-0.0847752	0.223833	0.165034	0.552209
ABCC1	6241.71	0.039446	0.148249	0.683524	0.907003
ABCC10	4795.32	-0.0922185	0.155866	0.378257	0.748762
ABCC11	564.694	-0.126442	0.268651	0.0001156	0.00882361
ABCC12	21.5003	-0.113806	0.258661	6.10658e-05	0.00592413
ABCC13	44.852	-0.0191466	0.211457	0.373978	0.745934
ABCC2	595.014	-0.0396816	0.187917	0.660388	0.899271
ABCC3	6197.46	-0.016369	0.182573	0.852675	0.964301
ABCC4	1721.01	0.264265	0.33926	0.0450836	0.313404
ABCC5	10319.7	-0.232143	0.246211	0.0778597	0.40847
ABCC6	522.359	-0.00566783	0.205597	0.87254	0.969214
ABCC6P1	29.3864	0.00815503	0.208206	0.779467	0.942938
ABCC8	186.278	-0.00339779	0.209883	0.824816	0.956026
ABCC9	3738.63	0.0128603	0.195713	0.865425	0.968186
ABCD1	3830.61	-0.0333235	0.188809	0.697175	0.913489
ABCD2	623.034	1.909	0.859771	0.000173328	0.0113717
ABCD3	3972.27	-0.00483519	0.189345	0.949433	0.985221
ABCD4	2343.87	0.0521066	0.171047	0.646006	0.893946
ABCE1	5834.03	0.0115513	0.175732	0.927951	0.98093
ABCF1	4152.81	-0.0295871	0.156737	0.756012	0.935227
ABCF2	2863.43	-0.0631269	0.158898	0.557858	0.852945
ABCF3	3891.32	-0.126827	0.186695	0.264277	0.660385
ABCG1	4630.24	0.0792103	0.180442	0.446889	0.795171
ABCG2	313.105	-0.00785745	0.199988	0.915946	0.977486
ABCG4	21.8573	-0.00978596	0.207485	0.772726	0.941008
ABHD1	96.2651	-0.00353587	0.208238	0.888595	0.972079
ABHD10	707.244	0.0446211	0.175985	0.659007	0.898838
ABHD11	1941.32	-0.213994	0.30681	0.0575094	0.353426
ABHD12	2657.12	0.104088	0.181848	0.341794	0.720902
ABHD12B	32.3361	-0.00214007	0.210456	0.87155	0.969214
ABHD13	944.249	0.141555	0.201759	0.216394	0.614563
ABHD14A	461.444	0.167079	0.239253	0.137811	0.510731
ABHD14B	1111.74	0.12513	0.201126	0.255771	0.652411
ABHD15	605.867	0.103751	0.191214	0.335484	0.718226
ABHD16A	2805.21	-0.0789102	0.197968	0.390698	0.757434
ABHD16B	20.2026	-0.0107903	0.202101	0.85165	0.964179
ABHD17A	1917.41	0.328457	0.251548	0.0301253	0.253268
ABHD17B	726.015	0.0876607	0.184964	0.405812	0.766435
ABHD17C	852.349	-0.0239282	0.204527	0.636214	0.890167
ABHD2	6449.33	0.0868245	0.174855	0.423287	0.780328
ABHD3	1904.85	0.134865	0.208469	0.224597	0.622284
ABHD4	1052.61	0.146125	0.18612	0.212624	0.610619
ABHD5	1130.19	-0.0234574	0.175142	0.810293	0.952322
ABHD6	424.355	0.158588	0.245694	0.132302	0.503767
ABHD8	854.669	0.0833174	0.175244	0.438589	0.790228
ABI1	8082.73	0.144223	0.218735	0.190942	0.586523
ABI2	3065.26	-0.0548082	0.162462	0.604659	0.875898
ABI3	2430.72	0.48797	0.662178	0.0119252	0.153579
ABI3BP	7180.92	0.0562672	0.214463	0.236296	0.632114
ABL1	29750.4	-0.00875575	0.178001	0.923089	0.97979
ABL2	4757.36	-0.195111	0.228444	0.104189	0.460877
ABLIM1	3516.81	0.336956	0.19611	0.0170367	0.189065
ABLIM2	956.882	-1.53852	0.706382	0.000336615	0.0174585
ABLIM3	1258.92	0.0280675	0.19694	0.70126	0.915698
ABO	395.698	-0.0119821	0.191474	0.875407	0.969455
ABR	10400.6	0.319218	0.354944	0.0352124	0.2749
ABRACL	2146.82	0.114354	0.224929	0.19688	0.591672
ABT1	1130.32	0.0772088	0.164827	0.476731	0.814393
ABTB1	2181.37	0.0056033	0.173414	0.955087	0.986992
ABTB2	1063.32	-0.0283035	0.200683	0.659241	0.898838
ACAA1	1599.84	0.0513026	0.156282	0.6309	0.88706
ACAA2	1400.64	0.148926	0.250937	0.116572	0.480837
ACACA	9751.67	-0.21826	0.318705	0.0516503	0.335322
ACACB	5084.58	-0.0268009	0.198839	0.683445	0.907003
ACAD10	3073.12	-0.0353563	0.158712	0.730945	0.926119
ACAD11	51.8901	-0.04716	0.206438	0.456807	0.803047
ACAD8	1075.49	0.013521	0.170394	0.894332	0.972651
ACAD9	4361.36	-0.227543	0.241415	0.0818347	0.415556
ACADL	40.5434	0.0674731	0.218759	0.196462	0.591593
ACADM	2842.07	0.151108	0.21866	0.179653	0.574392
ACADS	514.823	0.113825	0.205999	0.273265	0.667529
ACADSB	1621.07	-0.00526518	0.201734	0.91277	0.977405
ACADVL	12592.2	-0.0605875	0.17027	0.570944	0.859803
ACAN	823.179	-0.174345	0.281185	0.0691973	0.386092
ACAP1	2165.53	1.70568	0.708179	0.000195712	0.0120661
ACAP2	6531.44	0.204556	0.2245	0.104609	0.461373
ACAP3	4459.7	-0.573165	0.395241	0.00708941	0.115684
ACAT1	2417.35	0.0454198	0.172554	0.658333	0.898838
ACAT2	1394.41	-0.0351849	0.179127	0.720735	0.923448
ACBD3	6473.84	-0.208265	0.242071	0.0993581	0.450133
ACBD4	901.883	-0.0414555	0.191813	0.625553	0.885305
ACBD5	2594.88	0.0367545	0.186982	0.679937	0.905992
ACBD6	2234.08	-0.133269	0.221383	0.202293	0.598104
ACBD7	94.4326	-0.0147034	0.199541	0.815725	0.953873
ACCS	1511.41	0.0270135	0.179013	0.779884	0.942938
ACD	987.595	0.0628732	0.187957	0.516373	0.835908
ACE	4610.2	0.264566	0.211833	0.0519951	0.336133
ACE2	95.3614	-0.00776382	0.209231	0.728852	0.92522
ACER1	17.7514	0.0132452	0.209438	0.601677	0.874352
ACER2	298.641	-0.0877984	0.217994	0.241026	0.635402
ACER3	1147.55	0.104484	0.193187	0.328796	0.713563
ACHE	231.347	0.101057	0.236509	0.0789101	0.410549
ACIN1	14220.5	-0.0989292	0.162695	0.37052	0.743092
ACKR1	1369.66	0.113469	0.248098	0.0346785	0.272118
ACKR2	302.749	-0.04681	0.210522	0.347847	0.724519
ACKR3	1127.88	-0.151302	0.216461	0.164773	0.552185
ACKR4	155.521	0.391784	0.388182	0.0233557	0.221863
ACLY	13319.1	-0.0527546	0.151036	0.617503	0.88191
ACN9	294.161	0.0879962	0.206076	0.330377	0.714775
ACO1	2752.01	0.0607496	0.196664	0.485259	0.817802
ACO2	8867.73	-0.0625194	0.170916	0.555191	0.852022
ACOT1	234.46	-0.0917538	0.198819	0.357073	0.732332
ACOT11	807.854	-0.0183398	0.183845	0.836879	0.959129
ACOT13	692.095	0.106281	0.187448	0.330757	0.715505
ACOT2	922.277	0.0639818	0.183845	0.519524	0.836197
ACOT4	204.364	-0.081015	0.194854	0.407082	0.767545
ACOT7	1056.03	-0.0379241	0.176886	0.697149	0.913489
ACOT8	938.961	0.0443641	0.161171	0.675802	0.904846
ACOT9	1789.24	0.0513772	0.198189	0.528134	0.841823
ACOX1	2770.22	0.00729973	0.157212	0.945888	0.985135
ACOX2	475.956	0.0898665	0.210246	0.299135	0.691591
ACOX3	2070.83	-0.30498	0.278292	0.0412237	0.299228
ACOXL	212.158	-1.11082	0.903811	0.00242589	0.0637928
ACP1	1557.66	0.0419826	0.170006	0.684881	0.907128
ACP2	3070.62	0.123451	0.22343	0.219094	0.617069
ACP5	5702.23	0.0697609	0.216828	0.227492	0.624194
ACP6	726.386	-0.0944148	0.219191	0.232283	0.628458
ACPP	140.661	0.664311	0.479256	0.0064074	0.109861
ACR	71.0012	0.0610574	0.20925	0.376138	0.746589
ACRBP	357.161	0.42237	0.278403	0.0136173	0.165792
ACRC	690.535	0.0539246	0.18099	0.588175	0.868275
ACSF2	1912.19	-0.041418	0.174388	0.678206	0.905005
ACSF3	2358.61	0.221878	0.212051	0.0882158	0.427935
ACSL1	4876.14	0.128834	0.211305	0.233572	0.629595
ACSL3	7621.53	-0.146381	0.212127	0.195869	0.59111
ACSL4	6254.02	0.0962905	0.216614	0.228728	0.625163
ACSL5	2454.36	0.295577	0.512203	0.0149345	0.175085
ACSL6	789.695	0.0314532	0.208335	0.541478	0.847357
ACSM1	29.6296	-0.0132069	0.204135	0.791844	0.945084
ACSM2A	17.2537	0.000287397	0.210581	0.961617	0.98907
ACSM2B	16.3162	-0.00318171	0.209552	0.886608	0.972061
ACSM3	134.495	0.135779	0.261046	0.0553079	0.345644
ACSM5	171.844	0.0485622	0.213302	0.249099	0.644949
ACSS1	1836.79	0.0161579	0.172036	0.86639	0.968386
ACSS2	1759.37	-0.0154386	0.188098	0.847843	0.962683
ACSS3	771.848	-0.0130616	0.195377	0.853178	0.964301
ACTA1	2278.77	-0.076777	0.224497	0.0938552	0.441137
ACTA2	19685.1	-0.0715535	0.194843	0.439453	0.790434
ACTA2-AS1	41.0837	0.0925964	0.22626	0.179281	0.574029
ACTB	270879	0.114676	0.21173	0.255073	0.651587
ACTC1	454.263	-0.0710008	0.226451	0.00769787	0.121228
ACTG1	110041	0.0464128	0.174047	0.65145	0.896103
ACTG2	18551.2	-0.0212719	0.200847	0.720496	0.923377
ACTL10	148.453	-0.104702	0.191987	0.329512	0.714059
ACTL6A	3554.81	-0.109114	0.19498	0.296908	0.688995
ACTL8	59.7649	-0.00957153	0.209809	0.650571	0.895721
ACTN1	35042.2	-0.185115	0.243237	0.117479	0.482201
ACTN2	452.424	-0.0727003	0.225753	0.0234793	0.222458
ACTN3	58.5973	-0.020752	0.206682	0.620397	0.88375
ACTN4	74298.6	-0.171533	0.277622	0.0715166	0.393199
ACTR10	2640.53	0.121775	0.166553	0.279587	0.673254
ACTR1A	2406.78	0.0605338	0.165982	0.571361	0.860071
ACTR1B	3022.05	-0.0388883	0.166962	0.704761	0.916812
ACTR2	19110	0.294167	0.317333	0.0416899	0.301506
ACTR3	18218.7	0.222261	0.290781	0.0713886	0.393146
ACTR3B	1365	-0.354133	0.364461	0.0266671	0.239527
ACTR3C	975.545	-0.392463	0.286562	0.0185144	0.198331
ACTR5	813.45	-0.0577257	0.168904	0.580172	0.863543
ACTR6	2152.46	0.0821762	0.187872	0.404464	0.766014
ACTR8	1932.11	0.0538711	0.162366	0.603297	0.874931
ACTRT3	106.005	-0.0518862	0.204792	0.457168	0.803318
ACVR1	2019.84	0.0275355	0.174902	0.781723	0.943629
ACVR1B	1280.2	-0.0840415	0.174448	0.432727	0.786666
ACVR1C	30.6664	-0.0492426	0.205287	0.474548	0.813096
ACVR2A	1698.82	0.0736794	0.188466	0.459555	0.803447
ACVR2B	827.997	-0.389727	0.34777	0.0221887	0.21697
ACVRL1	2105.38	0.0987313	0.197274	0.333576	0.716799
ACY3	63.0805	0.0171237	0.208553	0.595239	0.871612
ACYP1	655.092	-0.113906	0.193056	0.296202	0.688639
ACYP2	177.874	0.150601	0.246632	0.132059	0.503394
ADA	1408.74	0.262306	0.333627	0.0471174	0.320745
ADAL	521.185	0.0192913	0.182334	0.839952	0.9601
ADAM10	11269.5	0.0637186	0.189122	0.506487	0.829951
ADAM11	83.0028	-0.0725236	0.201042	0.413222	0.773788
ADAM12	4101.07	0.0102893	0.200072	0.864792	0.968082
ADAM15	14125.5	-0.108801	0.23508	0.119772	0.485646
ADAM17	6268.94	0.0128666	0.161597	0.857928	0.965745
ADAM19	3609.91	0.152212	0.208736	0.188921	0.584332
ADAM1A	374.254	0.107234	0.208013	0.281587	0.675577
ADAM20	415.787	-0.0111295	0.191443	0.892258	0.972276
ADAM20P1	77.2352	-0.00035134	0.199159	0.991932	0.99814
ADAM21	30.1661	-0.0611838	0.2151	0.264384	0.660385
ADAM22	549.287	-0.0459364	0.207158	0.423286	0.780328
ADAM23	250.344	0.0221529	0.201147	0.72173	0.923474
ADAM28	3394.05	0.152179	0.277898	0.0360154	0.278791
ADAM32	480.379	-0.258085	0.323988	0.0519661	0.336133
ADAM33	1179.1	0.0737977	0.227563	0.0146203	0.173311
ADAM8	3773.01	-0.0739302	0.208912	0.328557	0.713563
ADAM9	13087.3	-0.175648	0.253069	0.113105	0.474503
ADAMDEC1	2690.33	0.14499	0.284126	0.00225811	0.0613334
ADAMTS1	2609.79	-0.121955	0.202412	0.230052	0.626599
ADAMTS10	2532.02	0.011009	0.182547	0.911908	0.977074
ADAMTS12	3727.59	-0.112512	0.236392	0.122723	0.490775
ADAMTS13	825.47	-0.301058	0.575337	0.010255	0.141948
ADAMTS14	2293.45	-0.323916	0.38895	0.0312991	0.259004
ADAMTS15	531.314	-0.669021	0.283151	0.00118819	0.0393482
ADAMTS16	602.51	-0.0520795	0.209026	0.371268	0.743904
ADAMTS17	537.426	-0.0926646	0.230363	0.106929	0.464303
ADAMTS18	157.186	-0.0396261	0.209714	0.378386	0.748841
ADAMTS19	65.091	-0.0806885	0.229568	0.0401563	0.295892
ADAMTS2	8222.6	-0.0385849	0.204517	0.512181	0.833944
ADAMTS20	56.9337	-0.0387925	0.210947	0.369164	0.742112
ADAMTS3	169.363	-0.0103462	0.203523	0.825181	0.956026
ADAMTS4	1687.96	-0.813312	0.481219	0.00276576	0.068498
ADAMTS5	1559.69	-0.0794372	0.208506	0.331169	0.715775
ADAMTS6	1019.42	-0.0835784	0.187089	0.415016	0.775524
ADAMTS7	1571.6	-0.438391	0.339909	0.0144927	0.172321
ADAMTS7P1	41.5808	-0.0116447	0.200252	0.846858	0.962255
ADAMTS8	62.3364	-2.70356	0.525731	1.03071e-08	7.16795e-06
ADAMTS9	4437.7	-0.34299	0.405411	0.0274005	0.242559
ADAMTSL1	992.146	-0.161616	0.261936	0.0948967	0.443515
ADAMTSL2	1623.85	-0.155786	0.289179	0.0146745	0.173311
ADAMTSL3	965.851	-0.0506301	0.212681	0.252657	0.649039
ADAMTSL4	5828.39	-0.0570491	0.214401	0.236694	0.632114
ADAMTSL5	160.461	-0.0231915	0.19768	0.73795	0.928802
ADAP1	1191.33	0.15914	0.213323	0.174255	0.567436
ADAP2	2866.18	0.13909	0.242589	0.136739	0.509677
ADAR	28838.6	0.0289991	0.156317	0.81496	0.953796
ADARB1	3543	-0.028467	0.192575	0.722557	0.9235
ADARB2	68.4886	0.0861203	0.230074	0.0788658	0.410549
ADAT1	1366.92	0.0736845	0.170481	0.492692	0.822147
ADAT2	327.76	0.0385727	0.190755	0.655977	0.897875
ADAT3	371.633	-0.0610159	0.197962	0.474341	0.813063
ADCK1	501.049	-0.00826883	0.169409	0.93611	0.982506
ADCK2	2070.32	0.01863	0.157251	0.862213	0.967374
ADCK3	3344.99	-0.0860931	0.172582	0.424864	0.781329
ADCK4	1716.26	-0.16515	0.25768	0.106796	0.463841
ADCK5	1085.7	-0.102894	0.221789	0.217132	0.61463
ADCY1	1927.19	-0.0367416	0.208831	0.406233	0.766525
ADCY10	45.9977	-0.064406	0.212272	0.321362	0.708809
ADCY10P1	60.4615	0.00964255	0.198768	0.883292	0.971033
ADCY2	796.377	0.049438	0.211051	0.321162	0.708684
ADCY3	6799.99	0.0150952	0.174759	0.879281	0.969954
ADCY4	1751.92	-0.0532255	0.194566	0.530799	0.843231
ADCY5	1292.08	-0.023076	0.209401	0.442011	0.792418
ADCY6	4950.77	-0.21013	0.319512	0.0475106	0.322035
ADCY7	10195.4	0.254924	0.378307	0.033948	0.269477
ADCY9	3842.76	-0.111817	0.208455	0.265744	0.661262
ADCYAP1	265.115	-0.0133204	0.202747	0.789543	0.944605
ADCYAP1R1	45.1548	-0.0497435	0.213374	0.263277	0.659654
ADD1	10920.2	0.0571786	0.181363	0.577815	0.862895
ADD2	832.606	0.100162	0.226679	0.176908	0.570742
ADD3	6951.52	0.824267	0.507195	0.0029888	0.0712803
ADH1A	41.0373	0.0145988	0.210247	0.44167	0.792207
ADH1B	1557.93	0.00503909	0.207275	0.916747	0.977574
ADH1C	65.1597	0.109646	0.249925	0.00841195	0.126463
ADH4	49.5146	-0.0141326	0.210551	0.402145	0.764702
ADH5	3147.14	0.134695	0.201401	0.231449	0.62758
ADHFE1	901.249	-0.0416102	0.196348	0.595882	0.871647
ADI1	1451.1	-0.00827021	0.161022	0.93449	0.982169
ADIPOR1	4969.99	-0.0838614	0.1977	0.386277	0.753484
ADIPOR2	3222.96	-0.278217	0.21004	0.0438892	0.30868
ADK	2791.31	-0.0298804	0.163021	0.766396	0.938416
ADM	589.11	-0.0106698	0.204018	0.81962	0.955662
ADM2	263.229	-0.0307248	0.208064	0.46629	0.807608
ADM5	109.114	-0.0281043	0.202933	0.620573	0.883788
ADNP	12637.4	-0.0172756	0.166521	0.856136	0.96488
ADNP2	2943.73	-0.0477372	0.167583	0.642427	0.892682
ADO	899.827	0.0544192	0.174998	0.595481	0.871612
ADORA1	1324.93	-0.0444061	0.21075	0.326205	0.711861
ADORA2B	189.361	-0.0983684	0.211322	0.285505	0.678728
ADORA3	784.448	0.0829586	0.224471	0.144416	0.520051
ADPGK	2417	0.0733309	0.176195	0.487495	0.819038
ADPRH	380.708	0.127682	0.233135	0.174227	0.567436
ADPRHL1	249.768	-0.235052	0.390529	0.0204407	0.207826
ADPRHL2	896.24	0.0744514	0.194744	0.435148	0.787298
ADPRM	383.678	0.316448	0.395818	0.0324706	0.263801
ADRA1A	101.439	0.00989631	0.205939	0.826111	0.956625
ADRA1B	59.9172	-0.0448694	0.213833	0.208033	0.604554
ADRA2A	1175.5	0.131273	0.243214	0.127317	0.498993
ADRA2B	34.5633	0.0497858	0.209261	0.403023	0.765369
ADRA2C	233.465	0.0025575	0.208396	0.937314	0.982873
ADRB1	82.2409	0.172368	0.305473	0.0243884	0.227111
ADRB2	507.435	0.55746	0.405171	0.00848208	0.127129
ADRBK1	15118.2	0.258845	0.205275	0.054727	0.344538
ADRBK2	5609.57	0.351872	0.336552	0.0291068	0.250148
ADRM1	7189.08	0.137933	0.197673	0.227212	0.624061
ADSL	2899.03	0.0855657	0.180369	0.428577	0.783681
ADSS	9175.09	-0.100642	0.193355	0.335302	0.718105
ADSSL1	603.803	-0.128181	0.244281	0.108858	0.466617
ADTRP	130.784	0.0565718	0.21635	0.182919	0.578621
AEBP1	66946.9	-0.0897695	0.219221	0.22523	0.622353
AEBP2	3090.4	0.0330775	0.162498	0.753371	0.93471
AEN	874.221	-0.0146376	0.181841	0.860729	0.966388
AES	12487.2	-0.00216699	0.187844	0.976733	0.994069
AFAP1	3173.33	-0.173884	0.231082	0.137689	0.510731
AFAP1-AS1	274.099	-1.03396	0.620002	0.00205788	0.0580818
AFAP1L1	1403.57	-0.731328	0.339493	0.001495	0.0470193
AFAP1L2	1159.57	-0.0211923	0.176686	0.824595	0.956026
AFF1	10228.6	0.12296	0.1968	0.2622	0.658665
AFF2	643.711	0.0429125	0.210867	0.333853	0.716868
AFF3	5378.85	-0.00711603	0.20858	0.740048	0.929098
AFF4	9926.17	-0.00202065	0.149323	0.985305	0.995846
AFG3L1P	176.318	-0.0437858	0.182322	0.649103	0.895456
AFG3L2	7022.02	0.00135211	0.170449	0.999584	0.999723
AFM	26.1113	-0.0030808	0.210787	0.799518	0.948177
AFMID	800.529	-0.190224	0.275972	0.0845797	0.420865
AFTPH	5242.77	0.272158	0.213715	0.0491967	0.326614
AGA	762.44	0.1584	0.211394	0.176315	0.570203
AGAP1	5060.95	-0.18252	0.273254	0.0855193	0.421521
AGAP11	683.982	0.00402766	0.19116	0.962345	0.989254
AGAP2	1674.21	1.30686	0.511346	0.000249652	0.0143249
AGAP2-AS1	530.31	-0.0306205	0.193853	0.695191	0.912402
AGAP3	6782.19	-0.0471926	0.177899	0.625608	0.885305
AGAP4	634.756	-0.223853	0.23185	0.087335	0.42621
AGAP6	3595.05	-0.233185	0.262627	0.0760996	0.404484
AGAP7P	48.3939	-0.0588611	0.209092	0.379525	0.74948
AGBL1	24.0955	-0.103703	0.246005	0.0177971	0.193763
AGBL2	262.745	-0.0292363	0.202426	0.626341	0.885382
AGBL3	232.996	-0.0354883	0.168767	0.728758	0.92522
AGBL4	44.8918	-0.0567167	0.217607	0.151071	0.531153
AGBL5	1492	0.0130476	0.175853	0.887658	0.972079
AGER	505.772	0.00989708	0.189346	0.908142	0.976133
AGFG1	8081.56	0.0734877	0.1793	0.492213	0.821916
AGFG2	1625.64	0.137474	0.200749	0.226655	0.623516
AGGF1	5461.36	0.135386	0.201702	0.230352	0.626692
AGK	1575.11	0.0527985	0.151655	0.624087	0.885129
AGL	5749.02	-0.0948388	0.197716	0.342415	0.721476
AGMAT	171.043	0.0652006	0.213948	0.28412	0.677666
AGMO	49.4612	0.0218085	0.200886	0.734467	0.92708
AGO1	3990.29	0.15372	0.22372	0.166205	0.554039
AGO2	9601.49	-0.019263	0.190534	0.80736	0.950691
AGO3	4509.67	0.0386948	0.172267	0.710748	0.919562
AGO4	3357.5	0.0927372	0.200344	0.344923	0.723172
AGPAT1	2177.71	-0.0889043	0.171355	0.413841	0.774431
AGPAT2	1476.97	-0.119232	0.209354	0.248907	0.644741
AGPAT3	4996.92	0.0125536	0.161829	0.906956	0.975861
AGPAT4	614.922	-0.0116016	0.19148	0.87845	0.969895
AGPAT4-IT1	88.2915	0.0325109	0.191495	0.702591	0.916055
AGPAT5	3003.56	0.0668556	0.191505	0.48116	0.816518
AGPAT6	6265.02	-0.0898822	0.225303	0.164254	0.551404
AGPAT9	309.475	-0.00458661	0.18878	0.949387	0.985221
AGPS	5076.68	0.0388893	0.184459	0.677747	0.904874
AGR2	2402.46	-0.0654302	0.223992	0.00446194	0.0879539
AGR3	1689.97	-0.0104104	0.209214	0.676704	0.904874
AGRN	22680.5	-0.779925	1.22788	0.00425592	0.0859388
AGT	1272.7	-0.0348211	0.211177	0.256595	0.65285
AGTPBP1	4004.48	0.132932	0.243669	0.125514	0.496063
AGTR1	198.139	0.0856616	0.233889	0.00879319	0.130485
AGTRAP	1420.42	-0.00539338	0.194776	0.937895	0.983074
AGXT	44.075	-0.0103518	0.21044	0.624316	0.885129
AHCTF1	18239.4	-0.144577	0.222217	0.192968	0.58924
AHCTF1P1	884.215	-0.0340835	0.186465	0.677585	0.904874
AHCY	4032.46	-0.0954121	0.197646	0.340318	0.720401
AHCYL1	4208.88	0.16587	0.218957	0.160042	0.546227
AHCYL2	1348.89	-0.0297961	0.162216	0.773021	0.941093
AHDC1	6692.7	-0.0347978	0.175398	0.724068	0.923769
AHI1	6283.59	-0.406618	0.234164	0.0102326	0.141912
AHNAK	398020	0.0450517	0.197446	0.570293	0.859563
AHNAK2	31606.7	-0.0473934	0.205979	0.442067	0.79243
AHR	12417.7	0.113756	0.230735	0.168291	0.557315
AHRR	122.259	-0.15104	0.246698	0.132961	0.504471
AHSA1	3430.69	0.0446575	0.174077	0.674764	0.904471
AHSA2	2621.7	-0.0446279	0.190634	0.605527	0.876102
AHSG	57.3828	-0.00689389	0.210261	0.681391	0.906784
AICDA	54.141	2.34458	1.59469	0.00439574	0.0875124
AIDA	4779.82	0.0672783	0.181307	0.505995	0.829512
AIF1	1067.44	0.167636	0.306743	0.00983703	0.139728
AIF1L	974.889	-0.0217802	0.173515	0.824089	0.956026
AIFM1	2385.35	0.00346607	0.167456	0.979614	0.994321
AIFM2	860.326	0.0673652	0.18655	0.494392	0.823086
AIFM3	396.31	-0.0895288	0.206448	0.325977	0.711815
AIG1	1191.46	0.0563748	0.169274	0.595381	0.871612
AIM1	8665.1	0.183279	0.303034	0.0433841	0.307116
AIM1L	623.708	-0.0479085	0.214247	0.187485	0.58352
AIM2	1564.51	1.71204	0.927063	0.00037744	0.0187465
AIMP1	1976.91	0.0273425	0.176244	0.781781	0.943629
AIMP2	1113.76	-0.130602	0.208609	0.230304	0.626692
AIP	1981.17	0.300928	0.269912	0.043544	0.307496
AIRE	35.9731	0.00526301	0.208679	0.866568	0.968386
AJAP1	80.305	-0.0450694	0.199552	0.552309	0.851372
AJUBA	693.592	-0.154939	0.260025	0.0960137	0.444541
AK1	1160.07	-0.229668	0.229726	0.0823719	0.416789
AK2	3205.29	-0.0363715	0.181877	0.701614	0.915794
AK3	1478.83	0.0236237	0.15512	0.824775	0.956026
AK4	483.659	0.00216121	0.199216	0.962414	0.989254
AK5	265.499	0.0332322	0.203818	0.574244	0.861713
AK7	71.9011	0.00728057	0.194246	0.929217	0.981213
AK8	91.9323	-0.0454612	0.209677	0.375942	0.746419
AK9	946.546	0.0936548	0.215006	0.267537	0.663205
AKAP1	4992.62	-0.0849713	0.208924	0.308902	0.698112
AKAP10	3609.97	0.170398	0.223052	0.146713	0.523662
AKAP11	10584.8	0.228566	0.246021	0.0833917	0.418583
AKAP12	2139.73	0.0987776	0.229678	0.143146	0.518162
AKAP13	20495.4	0.199573	0.252797	0.102689	0.457783
AKAP17A	4469.61	0.0148591	0.153316	0.885349	0.971822
AKAP2	26.6423	0.0371631	0.202499	0.587258	0.86776
AKAP3	288.191	0.0402521	0.177864	0.684911	0.907128
AKAP5	288.914	0.284624	0.415803	0.0295852	0.251434
AKAP6	410.576	-0.00503901	0.199287	0.931382	0.981797
AKAP7	457.329	0.172578	0.278056	0.0742556	0.400292
AKAP8	3359.38	-0.23779	0.201379	0.0693914	0.386927
AKAP8L	5784.67	-0.159005	0.226358	0.161237	0.547619
AKAP9	188504	-0.178071	0.242874	0.122736	0.490775
AKIP1	729.321	-0.0579192	0.169971	0.578627	0.863281
AKIRIN1	2418.52	0.0978571	0.203111	0.32819	0.713563
AKIRIN2	1435.48	0.177024	0.259624	0.108481	0.465975
AKNA	13190.8	1.2532	0.565397	0.000551168	0.0233069
AKR1A1	4113.23	0.111621	0.215423	0.245146	0.6414
AKR1B1	1591.62	0.0970564	0.232773	0.0992442	0.450133
AKR1B10	101.45	-0.007313	0.209244	0.741978	0.929991
AKR1B15	273.255	-0.105863	0.24908	0.00157746	0.0480611
AKR1C1	1015.7	0.00843804	0.195745	0.905331	0.974918
AKR1C2	3133.48	0.0758317	0.223345	0.11715	0.482013
AKR1C3	907.071	0.242843	0.258527	0.0716865	0.393225
AKR1E2	509.538	-0.0726753	0.215815	0.253137	0.649311
AKR7A2	2767.36	0.0230978	0.153472	0.824192	0.956026
AKR7A3	319.713	-0.109551	0.242413	0.0637	0.373899
AKR7L	103.506	-0.0585324	0.215085	0.232813	0.628702
AKT1	55430.9	-0.0652029	0.200379	0.433363	0.786847
AKT1S1	1328.35	-0.0202317	0.193671	0.789075	0.9445
AKT2	33165.3	-0.113428	0.221265	0.215456	0.613682
AKT3	34311.6	0.18189	0.254829	0.110881	0.470535
AKTIP	1344.19	0.173061	0.218443	0.151477	0.531887
ALAD	924.027	-0.0533858	0.193839	0.540857	0.847201
ALAS1	2720.73	0.2497	0.276773	0.0637692	0.373899
ALAS2	84.7542	0.0152989	0.210926	0.198469	0.5937
ALB	955.272	-0.0571173	0.21988	0.0243604	0.227111
ALCAM	11448.7	-0.141935	0.265874	0.0471078	0.320745
ALDH16A1	2074.14	0.0212345	0.162024	0.875305	0.969455
ALDH18A1	3769.6	-0.110233	0.174036	0.325884	0.711815
ALDH1A1	3650.35	0.161021	0.305434	0.0029497	0.0706949
ALDH1A2	52.2099	0.00805511	0.206505	0.830103	0.958184
ALDH1A3	1727.73	-0.0184125	0.203005	0.726566	0.924862
ALDH1B1	1245.93	-0.214022	0.240896	0.0917831	0.436985
ALDH1L1	129.128	-0.0269774	0.21004	0.374863	0.746419
ALDH1L2	2213.64	-0.0389657	0.203832	0.526169	0.840701
ALDH2	7591.17	0.130515	0.243588	0.122042	0.489448
ALDH3A2	3337.79	0.00610879	0.17194	0.956117	0.987252
ALDH3B1	1822.15	0.0660591	0.20003	0.438925	0.790434
ALDH3B2	503.199	-0.236448	0.441014	0.00415564	0.0847841
ALDH4A1	642.792	-0.364551	0.379019	0.0262291	0.237634
ALDH5A1	492.392	-0.0161477	0.197533	0.804327	0.950067
ALDH6A1	1276.31	-0.0910766	0.182595	0.385333	0.753245
ALDH7A1	5969.85	-0.273843	0.261259	0.0570807	0.352349
ALDH8A1	100.341	-0.0160149	0.190153	0.844168	0.961178
ALDH9A1	3342.96	0.0822644	0.169711	0.445912	0.794502
ALDOA	39179.4	-0.00262702	0.175012	0.975114	0.993824
ALDOB	166.326	0.00516055	0.209831	0.776036	0.941902
ALDOC	415.659	0.0343502	0.200584	0.613689	0.880347
ALG1	1238.96	-0.0975838	0.156482	0.375378	0.746419
ALG10	1731.21	-0.0033355	0.153587	0.989865	0.997033
ALG10B	1229.67	-0.023924	0.170261	0.81482	0.953796
ALG11	707.95	-0.0957816	0.166529	0.386121	0.753484
ALG12	2669.37	-0.087332	0.176675	0.40827	0.768382
ALG13	6308.73	-0.00665036	0.165286	0.952451	0.986598
ALG14	317.559	-0.048782	0.194653	0.562325	0.854447
ALG1L	83.2039	-0.0790867	0.211775	0.322338	0.709383
ALG1L2	63.1446	0.00779136	0.195413	0.913961	0.977486
ALG1L9P	132.881	-0.0569506	0.211437	0.3242	0.710411
ALG2	1117.95	-0.150625	0.1767	0.205669	0.601137
ALG3	1664.72	-0.0950355	0.211775	0.282996	0.676498
ALG5	1852.02	-0.0250372	0.163049	0.807285	0.950691
ALG6	1694.03	0.0840453	0.183616	0.423795	0.780766
ALG8	2221.95	-0.141989	0.252031	0.106573	0.463841
ALG9	1188.83	0.0148172	0.156808	0.875066	0.969455
ALK	1134.32	0.125257	0.256713	0.0340538	0.269854
ALKBH1	549.076	0.0540387	0.181863	0.585608	0.866989
ALKBH2	347.038	-0.0755825	0.202158	0.38577	0.753484
ALKBH3	1064.71	0.0360008	0.171746	0.67606	0.904874
ALKBH4	433.961	-0.0424153	0.168856	0.680044	0.906065
ALKBH5	4097.59	0.150309	0.21055	0.192982	0.58924
ALKBH6	644.975	-0.127282	0.23121	0.168251	0.557288
ALKBH7	587.758	-0.0216945	0.196276	0.754485	0.934893
ALKBH8	1045.11	0.0512506	0.190029	0.575354	0.861926
ALMS1	14127.2	-0.0867579	0.156701	0.408666	0.768628
ALMS1P	79.1619	0.0199244	0.192987	0.801452	0.948769
ALOX15	79.4785	0.0161166	0.207219	0.673752	0.904023
ALOX15B	581.796	0.121275	0.259963	0.00477186	0.0918755
ALOX15P1	49.1313	0.0660904	0.217517	0.22149	0.619299
ALOX5	5015.31	0.0972541	0.227274	0.165483	0.552969
ALOX5AP	1704.1	0.132358	0.265311	0.020172	0.206622
ALOXE3	27.2049	-0.0288099	0.212029	0.194954	0.59111
ALPI	139.002	-0.0140523	0.211156	0.317529	0.705411
ALPK1	3067.76	0.150652	0.238887	0.140318	0.514186
ALPK2	1189.98	0.077813	0.19808	0.412326	0.772905
ALPK3	1197.34	-0.631285	0.347613	0.00371459	0.0796325
ALPL	594.592	0.383706	0.669836	0.01393	0.168419
ALPP	145.719	-0.126089	0.269644	0.000128253	0.00927679
ALS2	3259.27	-0.110803	0.162062	0.295787	0.688639
ALS2CL	2266.78	-0.140211	0.271076	0.022243	0.217257
ALS2CR11	256.974	-6.33733e-05	0.202297	0.988433	0.996701
ALS2CR12	193.65	0.0205887	0.195668	0.782418	0.943896
ALX1	30.0572	-0.0244167	0.212595	0.281909	0.676037
ALYREF	1240.62	0.00905601	0.179252	0.923604	0.979853
AMACR	64.7751	-0.00544113	0.194701	0.940179	0.983745
AMBP	98.1742	-0.0263804	0.211949	0.0826195	0.416837
AMBRA1	4956.66	-0.0039554	0.162976	0.968954	0.991893
AMD1	5267.03	0.0994979	0.21415	0.265915	0.661262
AMDHD1	73.482	0.0541757	0.21254	0.305518	0.694816
AMDHD2	2364.32	0.0343115	0.172029	0.735483	0.92761
AMER1	1569.35	0.052842	0.189883	0.564847	0.856631
AMER3	523.014	-0.0040819	0.211013	2.7224e-14	1.3594e-10
AMFR	6389.72	0.128495	0.203184	0.241999	0.63652
AMH	201.66	-0.00890795	0.207274	0.797425	0.947448
AMICA1	1321.99	1.93835	0.991591	0.000324936	0.0172236
AMIGO1	266.31	0.0400943	0.198555	0.598414	0.872308
AMIGO2	1561.4	0.0796269	0.208066	0.329498	0.714059
AMIGO3	335.809	-0.149417	0.215591	0.187634	0.58352
AMMECR1	616.843	0.0344649	0.176604	0.727637	0.925074
AMMECR1L	1100.58	-0.12242	0.192653	0.268884	0.664225
AMN	42.0346	-0.0959289	0.233018	0.106735	0.463841
AMN1	549.63	-0.0704814	0.172906	0.504628	0.828624
AMOT	3319.75	0.00183015	0.191925	0.988291	0.996701
AMOTL1	4927.03	-0.0782429	0.193391	0.434218	0.786847
AMOTL2	2765.04	-0.263222	0.369367	0.036314	0.279991
AMPD1	92.7421	-0.00400478	0.208039	0.876525	0.969611
AMPD2	3727.8	0.0723386	0.173693	0.499509	0.825874
AMPD3	3350.33	0.297987	0.387504	0.0345893	0.27199
AMPH	202.821	-0.00141235	0.19736	0.975451	0.993824
AMT	747.977	-0.0262424	0.18782	0.759361	0.936333
AMY2B	1536.82	0.134397	0.197666	0.23717	0.632507
AMZ1	235.68	-0.171234	0.260824	0.106716	0.463841
AMZ2	3631.6	0.29905	0.264123	0.0424155	0.304348
AMZ2P1	369.455	0.167563	0.242312	0.134006	0.50496
ANAPC1	8468.37	-0.027129	0.165692	0.789148	0.944501
ANAPC10	847.43	0.0777744	0.17146	0.467914	0.808609
ANAPC11	1287	-0.0279738	0.18895	0.736022	0.927953
ANAPC13	927.998	0.00156168	0.153435	0.975141	0.993824
ANAPC15	456.754	0.0289407	0.175745	0.766853	0.938776
ANAPC16	1386.98	0.150642	0.198681	0.198884	0.594326
ANAPC1P1	244.833	0.0810053	0.212584	0.300735	0.691795
ANAPC2	4423.73	-0.193453	0.239587	0.108975	0.466917
ANAPC4	3359.48	0.101483	0.180518	0.354961	0.730166
ANAPC5	6715.35	0.0754868	0.161225	0.478009	0.814931
ANAPC7	3320.49	0.0376337	0.164002	0.713291	0.920864
ANG	319.147	0.178729	0.256364	0.112079	0.472575
ANGEL1	1379.25	-0.0218132	0.153572	0.83216	0.958649
ANGEL2	2868.06	-0.0331231	0.177958	0.73426	0.92708
ANGPT1	243.228	0.0483637	0.208594	0.390352	0.757167
ANGPT2	790.904	-0.0601026	0.203029	0.432924	0.786666
ANGPTL1	585.886	0.0624614	0.216141	0.200298	0.59589
ANGPTL2	5120.69	0.0160958	0.200092	0.755545	0.93494
ANGPTL3	20.2386	0.00267009	0.210693	0.734953	0.92737
ANGPTL4	373.957	-0.029594	0.208443	0.461455	0.804617
ANGPTL5	40.8999	0.0317594	0.210856	0.368284	0.741959
ANGPTL6	115.224	0.174074	0.286952	0.062307	0.369163
ANK1	427.003	0.00165187	0.203227	0.98233	0.995115
ANK2	3115.36	1.12319	0.582548	0.00102509	0.0357157
ANK3	5750.86	-0.0981312	0.220898	0.21696	0.614592
ANKAR	1387.3	0.0846972	0.202405	0.360856	0.735073
ANKDD1A	352.844	0.171053	0.265583	0.0970218	0.446367
ANKDD1B	94.4586	-0.00302057	0.191214	0.968475	0.99169
ANKEF1	491.223	-0.179804	0.281994	0.0725605	0.3961
ANKFY1	4534.44	0.105888	0.186635	0.332423	0.716576
ANKH	4442.42	0.0280198	0.171904	0.757776	0.935738
ANKHD1	216.854	0.0389261	0.17432	0.702655	0.916055
ANKHD1-EIF4EBP3	47.0412	0.0157562	0.199327	0.784491	0.944035
ANKIB1	9568.96	-0.0231765	0.166236	0.818921	0.955298
ANKK1	29.9352	0.0192969	0.201599	0.755729	0.934983
ANKLE1	174.073	0.0980413	0.205703	0.31343	0.702142
ANKLE2	6777.67	-0.124682	0.186663	0.272692	0.66743
ANKMY1	2578.87	-0.157874	0.188113	0.186784	0.583124
ANKMY2	1803.73	0.108721	0.175496	0.327843	0.713288
ANKRA2	1196.93	0.0993145	0.203973	0.314594	0.703409
ANKRD1	70.7507	-1.79949	0.897963	0.000809508	0.0306625
ANKRD10	8987.78	-0.0580066	0.181023	0.536997	0.845495
ANKRD11	17535.1	0.0501439	0.168126	0.628766	0.886093
ANKRD12	17097.6	0.377692	0.434338	0.0221357	0.216741
ANKRD13A	3580.84	0.144998	0.249182	0.118688	0.484022
ANKRD13B	1171.22	-0.278003	0.295559	0.0508794	0.333027
ANKRD13C	2600.93	0.0399091	0.17231	0.701195	0.915698
ANKRD13D	5028.65	-0.0924092	0.193186	0.363649	0.737979
ANKRD16	621.421	-0.0795931	0.201323	0.378969	0.749294
ANKRD17	24346.8	0.0219745	0.148159	0.837684	0.959609
ANKRD18A	947.65	-0.0209557	0.209794	0.409956	0.769957
ANKRD18B	46.7777	-0.0609868	0.217909	0.168078	0.55714
ANKRD19P	30.7409	-0.0582948	0.216677	0.196796	0.591672
ANKRD2	37.9396	-0.0780402	0.226563	0.0855474	0.421521
ANKRD20A11P	48.2274	-0.0852108	0.225515	0.151653	0.532118
ANKRD20A5P	229.094	-0.0105091	0.201936	0.845758	0.96176
ANKRD20A8P	101.145	-0.0159447	0.20868	0.587556	0.867906
ANKRD22	448.038	0.107989	0.24567	0.023575	0.223045
ANKRD23	624.136	-0.089377	0.220147	0.216708	0.614592
ANKRD24	224.386	0.000944041	0.196759	0.990883	0.997538
ANKRD26	5542.41	-0.197983	0.209554	0.11531	0.479192
ANKRD27	4978.73	-0.0448322	0.202665	0.507767	0.830646
ANKRD28	5269.13	-0.0444477	0.182798	0.629716	0.886533
ANKRD29	311.47	0.0707009	0.217509	0.225194	0.622353
ANKRD30A	459.099	-0.00717812	0.210177	0.648632	0.895375
ANKRD30B	1418.78	-0.07511	0.227808	0.0247107	0.228752
ANKRD31	212.401	-0.0226438	0.205335	0.624722	0.885129
ANKRD32	2024.08	0.243599	0.272709	0.0678547	0.384369
ANKRD33B	290.994	0.135493	0.255144	0.0798568	0.412352
ANKRD34A	169.195	-0.0287864	0.20587	0.554608	0.851767
ANKRD35	58.8182	0.0901922	0.216331	0.273213	0.667529
ANKRD36	17866.1	-0.288689	0.222116	0.0405685	0.297647
ANKRD36B	9514.88	-0.239619	0.262949	0.0684117	0.38517
ANKRD36C	16659.5	-0.081264	0.180861	0.436852	0.78897
ANKRD37	277.554	-0.00848312	0.196991	0.896961	0.973523
ANKRD39	424.008	-0.0353421	0.192802	0.663161	0.900448
ANKRD40	2462.36	0.00461071	0.155628	0.968278	0.991605
ANKRD42	718.982	-0.04786	0.183236	0.623942	0.885129
ANKRD44	6237.4	1.36583	0.448247	6.23781e-05	0.00595882
ANKRD45	23.818	-0.0441428	0.212252	0.302799	0.693126
ANKRD46	623.725	-0.0188705	0.188437	0.82914	0.957985
ANKRD49	644.237	0.351104	0.33239	0.0293705	0.25105
ANKRD50	4722.43	-0.163678	0.252627	0.115121	0.479017
ANKRD52	3940.06	-0.115555	0.172794	0.303658	0.694018
ANKRD53	102.04	0.0744806	0.212396	0.312345	0.701243
ANKRD54	472.872	-0.0919753	0.194894	0.363516	0.737979
ANKRD55	40.2376	0.0905445	0.234285	0.0463704	0.318582
ANKRD6	1302.76	0.032823	0.1884	0.707738	0.918262
ANKRD62	46.6685	-0.0078103	0.201801	0.8831	0.970946
ANKRD62P1-PARP4P3	17.6712	-0.017222	0.208451	0.655674	0.897728
ANKRD65	163.932	0.077694	0.201194	0.394614	0.759605
ANKRD7	25.1152	-0.0853035	0.229326	0.0957728	0.444384
ANKRD9	713.481	-0.112496	0.241747	0.0797559	0.411954
ANKS1A	5178.71	-0.100226	0.186544	0.375398	0.746419
ANKS1B	2352.88	-0.0720553	0.221765	0.122387	0.490056
ANKS3	1153.55	-0.20433	0.244143	0.10236	0.457317
ANKS6	725.884	-0.0264813	0.187587	0.763619	0.937789
ANKZF1	1871.07	-0.00413686	0.160734	0.959684	0.98887
ANLN	8220.08	-0.149233	0.274304	0.0368824	0.282111
ANO1	6898.86	-0.840641	0.620589	0.00349209	0.0770635
ANO10	2274.68	-0.062751	0.159586	0.557482	0.852752
ANO2	426.99	-0.0574026	0.209389	0.357811	0.733078
ANO3	33.0714	0.0879173	0.231743	0.0697119	0.387596
ANO4	53.7446	-0.0581517	0.21659	0.189614	0.585338
ANO5	289.464	-0.038982	0.207921	0.430269	0.784897
ANO6	7501.77	0.0266899	0.180848	0.770477	0.939956
ANO7	157.576	-0.185314	0.310136	0.0369419	0.282441
ANO8	4047.66	-0.529915	0.477667	0.0109063	0.144967
ANO9	3150.41	-0.0589525	0.208603	0.391261	0.757848
ANP32A	6285.63	0.151068	0.211776	0.188985	0.584332
ANP32B	6295.31	0.0716032	0.155748	0.510491	0.832277
ANP32C	116.028	0.188736	0.287074	0.0758671	0.404274
ANP32D	19.0828	0.060676	0.214567	0.288995	0.681827
ANP32E	3697.19	0.0586339	0.192027	0.521397	0.837801
ANPEP	13690.6	0.000458613	0.197661	0.983711	0.9956
ANTXR1	9558.65	-0.0876833	0.214442	0.269648	0.664588
ANTXR2	1774.16	0.180122	0.281688	0.0736216	0.398749
ANTXRL	524.4	0.0569457	0.208683	0.392891	0.758712
ANXA1	9821.05	0.00578085	0.201162	0.920622	0.978761
ANXA11	10457.9	0.0326613	0.186264	0.717244	0.922536
ANXA2	26763.4	-0.0094195	0.196251	0.887229	0.972079
ANXA2P1	140.839	0.0127402	0.196065	0.859308	0.966092
ANXA2P2	2120.53	0.0423357	0.194081	0.607615	0.877117
ANXA2R	296.287	0.923304	0.364254	0.000498107	0.0220921
ANXA3	2165.4	-0.140097	0.275543	0.00793462	0.122951
ANXA4	2826.03	0.00902153	0.185852	0.91791	0.977818
ANXA5	15049.4	0.0395964	0.192644	0.637589	0.891016
ANXA6	9896.48	0.0431634	0.185492	0.652884	0.896628
ANXA7	5474.51	0.106443	0.165982	0.344028	0.722725
ANXA8	35.9531	-0.0533563	0.21935	0.0378345	0.286245
ANXA8L1	63.5982	-0.0424482	0.213886	0.178617	0.57304
ANXA8L2	119.079	-0.027947	0.211486	0.240908	0.635398
ANXA9	703.02	-0.0819918	0.23074	0.0229031	0.219661
AOAH	3369.55	1.483	0.898986	0.000867135	0.0324215
AOC1	127.417	-0.0198934	0.209764	0.39268	0.758712
AOC2	391.798	-0.105498	0.204311	0.295405	0.688184
AOC3	1866.88	-0.056305	0.196846	0.493093	0.822421
AOC4P	41.1493	-0.022356	0.198184	0.747737	0.931778
AOX1	1817.17	0.0181305	0.20269	0.744865	0.930867
AP1AR	1458.09	-0.019014	0.169137	0.848657	0.963167
AP1B1	11561	0.101138	0.209376	0.287983	0.681022
AP1G1	6331.69	0.185921	0.186316	0.132653	0.504145
AP1G2	5181.58	-0.0102674	0.182768	0.906946	0.975861
AP1M1	3525.67	0.162598	0.228571	0.156806	0.540382
AP1M2	2747.01	-0.061289	0.221339	0.0209909	0.211074
AP1S1	1880.96	-0.132629	0.212679	0.217856	0.61577
AP1S2	1944.42	1.02066	0.424284	0.000528703	0.022809
AP1S3	275.641	-0.0987895	0.202896	0.317531	0.705411
AP2A1	10353.4	0.00217099	0.15831	0.983672	0.9956
AP2A2	10063.9	0.0598273	0.155635	0.579658	0.863543
AP2B1	11718.6	0.0457614	0.169371	0.639462	0.891485
AP2M1	12235.2	-0.0227509	0.154901	0.810774	0.952504
AP2S1	2801.44	0.0362738	0.184776	0.694765	0.912213
AP3B1	7958.1	0.177976	0.198211	0.14861	0.527791
AP3B2	383.792	-0.0118855	0.207946	0.699611	0.91482
AP3D1	14054.9	-0.00956679	0.163805	0.929552	0.98137
AP3M1	4179.73	0.109648	0.171263	0.321155	0.708684
AP3M2	1547.15	-0.150687	0.2583	0.0957396	0.444348
AP3S1	3174.84	0.0530295	0.198448	0.522922	0.838749
AP3S2	87.99	-0.0497521	0.191888	0.574767	0.86176
AP4B1	1536.3	0.226957	0.249491	0.0822352	0.416789
AP4E1	2006.29	0.142131	0.196063	0.223513	0.620966
AP4M1	1133.22	-0.318812	0.326218	0.0363637	0.279991
AP4S1	295.924	0.133586	0.22817	0.186614	0.582918
AP5B1	1662.3	0.00134487	0.178943	0.993156	0.998527
AP5M1	2689.95	0.147462	0.211482	0.194671	0.59111
AP5S1	426.854	-0.0590526	0.168392	0.573744	0.861495
AP5Z1	2646.45	-0.00337783	0.156388	0.971374	0.992684
APAF1	3734.05	0.103692	0.176811	0.347959	0.724519
APBA1	527.362	0.11149	0.227845	0.18547	0.581688
APBA2	1456.17	0.0891555	0.192351	0.39229	0.758646
APBA3	1591.6	0.007974	0.158657	0.939296	0.983653
APBB1	1124.22	0.0442651	0.200559	0.545414	0.84865
APBB1IP	4710.75	0.232016	0.422743	0.00612817	0.106544
APBB2	8135.53	-0.0986649	0.195595	0.336184	0.718399
APBB3	1245.29	-0.0498942	0.182727	0.624204	0.885129
APC	57879.8	0.0102768	0.149248	0.925397	0.980414
APC2	83.9348	-0.0264714	0.20801	0.511129	0.832847
APCDD1	1705.45	-0.107159	0.209511	0.272876	0.66743
APCDD1L	70.0341	-0.0502359	0.215883	0.141357	0.515337
APCS	35.0485	-0.0104235	0.210942	0.515068	0.83504
APEH	3976.22	-0.065607	0.161958	0.541449	0.847357
APEX1	9577.12	0.00275758	0.163858	0.983659	0.9956
APEX2	2091.1	-0.019041	0.177185	0.838382	0.959712
APH1A	4918.2	-0.101639	0.184738	0.397123	0.760903
APH1B	882.449	0.130625	0.228244	0.184482	0.579897
API5	8997.14	0.0797971	0.166349	0.468483	0.808609
APIP	1610.29	0.106732	0.186309	0.330328	0.714775
APLF	764.482	0.183723	0.261132	0.104555	0.461369
APLN	119.706	-1.54746	0.544571	0.000117483	0.00882361
APLNR	1129.63	-0.182538	0.288398	0.0634931	0.373356
APLP1	310.011	-0.101216	0.237222	0.0677492	0.384124
APLP2	15210.8	-0.00141309	0.196288	0.978968	0.994321
APMAP	3192.94	-0.082665	0.180243	0.433772	0.786847
APOA1	127.551	-0.00821951	0.208598	0.736885	0.928132
APOA1BP	2875.96	-0.0938593	0.215838	0.270256	0.665156
APOA2	60.0702	-0.0218321	0.211971	0.0774175	0.407996
APOA4	20.1558	0.0186384	0.21207	0.160588	0.54722
APOB	1773.94	0.0283453	0.21214	0.171683	0.563505
APOBEC3A	165.13	0.0540396	0.210072	0.357144	0.732332
APOBEC3B	2304.15	-0.24204	0.295692	0.0613637	0.366244
APOBEC3C	2094.63	0.233544	0.424614	0.00659948	0.111389
APOBEC3D	1886.6	1.37233	0.443322	5.33954e-05	0.00559237
APOBEC3F	2314.22	0.657489	0.461976	0.00537245	0.0979092
APOBEC3G	2964.84	1.74749	0.620228	6.3622e-05	0.00604405
APOBEC3H	185.134	1.21822	0.978929	0.00199391	0.0573943
APOBR	999.031	0.0464065	0.20332	0.502327	0.82711
APOC1	5458.5	0.0627047	0.220128	0.0758693	0.404274
APOC1P1	18.7253	0.0722189	0.224671	0.0823919	0.416789
APOC3	108.434	-0.00412552	0.210292	0.631576	0.887145
APOD	1307.44	-0.0921194	0.231292	0.0900965	0.433551
APOE	31599.5	0.0845672	0.227462	0.0974392	0.447078
APOH	93.3417	-0.00178176	0.210862	0.868545	0.96887
APOL1	3314.61	0.103983	0.227203	0.179243	0.574015
APOL2	3854.05	0.105525	0.226261	0.191375	0.587437
APOL3	2923.25	1.34993	0.517382	0.00018907	0.011782
APOL4	1087.88	0.0532074	0.215758	0.156302	0.539823
APOL6	2837.48	0.0962284	0.229852	0.12829	0.499856
APOLD1	329.091	-0.201228	0.277008	0.0843998	0.42062
APOM	47.3647	0.00647628	0.192799	0.932869	0.982013
APOO	480.729	-0.0177196	0.199372	0.775666	0.941902
APOOL	1336.47	0.0663436	0.195587	0.455427	0.802153
APOPT1	1182.44	0.0963982	0.167223	0.379812	0.749877
APP	31849.4	-0.504783	0.535395	0.0119626	0.153833
APPBP2	2878.18	0.170982	0.18758	0.160505	0.547058
APPL1	6317.34	0.103899	0.169692	0.352299	0.728828
APPL2	2551.03	0.121342	0.22005	0.218804	0.616551
APRT	1298.78	0.138615	0.215633	0.203867	0.599025
APTR	44.8053	-0.0295762	0.195364	0.702296	0.915988
APTX	1442.75	-0.101247	0.19834	0.320838	0.708629
AQP1	4040.59	0.0363078	0.192594	0.658849	0.898838
AQP11	85.6742	-0.136208	0.244804	0.131672	0.503254
AQP3	2718.27	0.0497693	0.210671	0.333257	0.716576
AQP5	311.851	0.0330793	0.204897	0.58081	0.86396
AQP6	18.1382	-0.0175932	0.210075	0.455647	0.802459
AQP7	74.6922	0.0414106	0.207201	0.464312	0.805969
AQP9	256.663	0.0143008	0.20788	0.659245	0.898838
AQPEP	42.1053	-0.107634	0.228207	0.191256	0.587281
AQR	6145.21	0.0649097	0.159091	0.546578	0.849026
AR	7810.64	0.0195917	0.204458	0.694416	0.912098
ARAF	26389	-0.076563	0.174193	0.469098	0.808912
ARAP1	15083.7	0.227058	0.208709	0.0829048	0.417377
ARAP2	7555.55	0.853972	0.560482	0.00305775	0.0721163
ARAP3	2163.45	-0.175128	0.245274	0.121098	0.487569
ARCN1	7091.57	0.0364193	0.171994	0.739393	0.929098
AREG	103.327	-0.0430557	0.215328	0.0351257	0.27447
AREL1	3247.55	0.0410532	0.148131	0.705424	0.916965
ARF1	13926.8	-0.0846043	0.199326	0.369893	0.742642
ARF3	3122.4	-0.0328811	0.1488	0.758711	0.936052
ARF4	6171.67	-0.0823279	0.192273	0.436769	0.78897
ARF5	3741.36	-0.0396428	0.169173	0.697558	0.913693
ARF6	7002.2	0.0880877	0.187247	0.396478	0.760865
ARFGAP1	4806.49	-0.191754	0.239883	0.109194	0.467117
ARFGAP2	3189.58	-0.0806991	0.161404	0.472087	0.811394
ARFGAP3	3249.77	-0.0108733	0.187351	0.895195	0.972802
ARFGEF1	22664.2	0.0198524	0.16313	0.850995	0.963997
ARFGEF2	14194.5	0.0265644	0.159532	0.824203	0.956026
ARFIP1	2097.8	0.0182241	0.153572	0.859151	0.966092
ARFIP2	1426.75	-0.174641	0.264828	0.0923762	0.438277
ARFRP1	3522.81	-0.196553	0.19714	0.115926	0.479992
ARG1	19.568	0.0287406	0.209123	0.481067	0.816518
ARG2	226.772	-0.617225	0.410731	0.00629542	0.108261
ARGLU1	5565.74	0.056459	0.17811	0.572081	0.860278
ARHGAP1	6071.62	-0.0388419	0.169139	0.705219	0.916935
ARHGAP10	2437.65	0.0674135	0.202495	0.416685	0.776164
ARHGAP11A	3365.82	-0.0742413	0.207801	0.346559	0.724154
ARHGAP11B	1329.29	-0.124991	0.229714	0.177465	0.571939
ARHGAP12	7178.39	-0.0161351	0.184778	0.850656	0.963997
ARHGAP15	3337.33	1.30023	0.873236	0.00131814	0.042756
ARHGAP17	6378.53	0.143686	0.240278	0.134132	0.505203
ARHGAP18	4495.34	0.105338	0.220777	0.22468	0.622318
ARHGAP19	34.2667	0.0834212	0.220548	0.236233	0.632114
ARHGAP20	351.046	0.106172	0.233862	0.129195	0.500422
ARHGAP21	19719.7	-0.0406728	0.200019	0.565497	0.857087
ARHGAP22	1008.71	0.141498	0.235693	0.158371	0.542944
ARHGAP23	3827.2	-0.0799039	0.169936	0.453001	0.799906
ARHGAP24	1441.79	0.0958478	0.217375	0.251063	0.647176
ARHGAP25	2950.53	1.1742	0.821108	0.00174954	0.0518186
ARHGAP26	4871.82	0.0703318	0.190002	0.47607	0.814129
ARHGAP27	3148.46	0.0453079	0.161553	0.666766	0.902085
ARHGAP28	968.735	0.0250505	0.200738	0.682394	0.907003
ARHGAP29	10493.3	-0.056923	0.18973	0.53535	0.84432
ARHGAP30	7780.23	1.09526	0.734117	0.00196063	0.0568124
ARHGAP31	5511.21	0.192477	0.262909	0.0953529	0.443867
ARHGAP32	5592.65	-0.432842	0.615519	0.0142041	0.170901
ARHGAP33	3090.63	-0.381571	0.604181	0.0159532	0.181639
ARHGAP35	13072.8	0.0661416	0.156414	0.543959	0.848066
ARHGAP39	2146.19	-0.102617	0.239913	0.0408436	0.298246
ARHGAP4	6448.91	0.72003	0.507676	0.00482015	0.092363
ARHGAP40	462.556	-0.0744697	0.227361	0.0131338	0.163103
ARHGAP42	1567.2	-0.0305562	0.191668	0.704871	0.916812
ARHGAP44	729.932	-0.710368	0.242879	0.000239068	0.0139011
ARHGAP5	13726.3	0.0804929	0.2056	0.355711	0.73093
ARHGAP6	560.368	-0.0114488	0.194336	0.875634	0.969455
ARHGAP8	20.5077	-0.060327	0.220369	0.0757046	0.404274
ARHGAP9	2404.76	0.318217	0.761419	0.00475928	0.0917709
ARHGDIA	12251.9	0.0638739	0.161072	0.550932	0.85115
ARHGDIB	7225.82	0.220965	0.374703	0.0156394	0.179476
ARHGDIG	69.0279	-0.0466925	0.215773	0.11622	0.4803
ARHGEF1	12219.2	0.373496	0.245993	0.0166348	0.186415
ARHGEF10	5989.51	-0.122018	0.214651	0.229668	0.626442
ARHGEF10L	6171.15	0.0083509	0.168278	0.936573	0.982581
ARHGEF11	8286.3	-0.208416	0.223138	0.105309	0.462364
ARHGEF12	15496	-0.0171315	0.159953	0.883575	0.971033
ARHGEF15	1469.79	-0.167	0.242739	0.130828	0.502667
ARHGEF16	1519.07	-0.0833602	0.232559	0.00471869	0.0913576
ARHGEF17	9560.24	-0.55177	0.342511	0.00645249	0.110259
ARHGEF18	5622.23	0.173319	0.243834	0.126994	0.498408
ARHGEF19	1303.34	-0.216409	0.324256	0.0469565	0.320628
ARHGEF2	12876.4	0.133616	0.20332	0.237691	0.632828
ARHGEF25	1341.5	-0.0225854	0.181116	0.802102	0.948931
ARHGEF26	1987.49	-0.184333	0.322686	0.0162374	0.183552
ARHGEF28	1768.92	-0.152618	0.27455	0.0425966	0.304858
ARHGEF3	2775.13	0.502541	0.389329	0.0108042	0.144421
ARHGEF33	56.2533	-0.0333736	0.196721	0.662149	0.900088
ARHGEF34P	1763.48	-0.250963	0.44832	0.0105931	0.143325
ARHGEF35	953.781	-0.138845	0.268942	0.0251653	0.231005
ARHGEF37	1319.47	-0.138833	0.265002	0.0412372	0.299228
ARHGEF38	233.371	-0.061741	0.221045	0.034847	0.272782
ARHGEF39	376.964	-0.252818	0.412685	0.0220694	0.216534
ARHGEF4	770.511	-0.093393	0.235916	0.0323581	0.263133
ARHGEF40	6951.33	-0.020321	0.186023	0.811968	0.952877
ARHGEF5	3266.07	-0.202187	0.349406	0.0140807	0.169769
ARHGEF6	6043.82	0.187594	0.304001	0.0470094	0.320638
ARHGEF7	7423.88	-0.0548985	0.175422	0.584699	0.866557
ARHGEF9	1989.33	0.0615428	0.164689	0.565837	0.857087
ARID1A	111427	0.0615036	0.170217	0.562208	0.854344
ARID1B	19671.4	0.075912	0.168415	0.483538	0.817201
ARID2	11200.3	-0.0138545	0.166972	0.888042	0.972079
ARID3A	1363.78	0.0302189	0.165255	0.769897	0.939676
ARID3B	834.276	0.335157	0.254943	0.0295143	0.251413
ARID3C	23.7085	-0.0477612	0.21458	0.202975	0.598225
ARID4A	4088.1	0.167597	0.216338	0.158831	0.543803
ARID4B	11547.5	-0.00709169	0.16942	0.949334	0.985221
ARID5A	3363.59	0.335677	0.337375	0.0326575	0.264514
ARID5B	7038.62	0.0539272	0.19379	0.538298	0.845889
ARIH1	4909.51	0.0948901	0.153959	0.389068	0.755624
ARIH2	4059.62	-0.056595	0.172387	0.606989	0.876681
ARIH2OS	44.2992	0.0488252	0.204822	0.483309	0.817201
ARL1	4097.65	-0.0446887	0.161633	0.670929	0.902871
ARL10	295.11	0.0973274	0.211168	0.289313	0.682038
ARL11	164.993	0.132804	0.249231	0.104192	0.460877
ARL13B	1051.93	0.0476607	0.167874	0.650102	0.895721
ARL14EP	1738.69	0.180366	0.206829	0.14441	0.520051
ARL15	748.61	0.0364912	0.20047	0.597575	0.871903
ARL16	441.758	-0.0221098	0.160673	0.829918	0.958034
ARL17A	1233.93	0.0572562	0.18731	0.551129	0.8512
ARL17B	89.4807	0.0170388	0.189408	0.840912	0.9601
ARL2	1247.17	0.178068	0.234618	0.13568	0.507952
ARL2BP	1534.32	0.156636	0.215725	0.176164	0.570028
ARL3	1093.03	0.0763823	0.158677	0.483592	0.817201
ARL4A	591.654	0.0100675	0.173657	0.916593	0.977574
ARL4C	2771.14	0.713888	0.43454	0.00384168	0.0809594
ARL4D	139.766	-0.0439442	0.199836	0.553325	0.851397
ARL5A	2621.21	0.201986	0.256072	0.0967066	0.445383
ARL5B	1623.37	-0.0444491	0.190074	0.617168	0.881683
ARL6	379.559	0.00569453	0.163484	0.958332	0.987937
ARL6IP1	5312.23	-0.233311	0.214945	0.0771784	0.407437
ARL6IP4	2960.55	0.245162	0.211665	0.0671254	0.382866
ARL6IP5	5376.13	0.265163	0.297847	0.0585927	0.357311
ARL6IP6	1725.34	0.015823	0.165274	0.879769	0.97023
ARL8A	3317.75	-0.100852	0.169473	0.358488	0.733687
ARL8B	2937.66	0.0550599	0.149339	0.603966	0.875341
ARL9	41.0868	-0.0785389	0.213278	0.306336	0.695909
ARMC1	2650.25	0.0381927	0.177144	0.734027	0.927052
ARMC10	2626.91	0.0416885	0.175904	0.67787	0.904874
ARMC12	52.2929	-0.044939	0.204291	0.498641	0.825723
ARMC2	763.988	0.107205	0.212711	0.268341	0.663723
ARMC3	113.295	-0.0871389	0.23417	0.0155623	0.179301
ARMC4	39.8932	-0.0325382	0.20673	0.52628	0.840752
ARMC5	755.801	-0.0136443	0.167541	0.895633	0.972974
ARMC6	1894.51	-0.258881	0.268266	0.0618993	0.367799
ARMC7	475.575	0.0307197	0.182823	0.743725	0.93061
ARMC8	4355.14	-0.017042	0.15288	0.859556	0.966092
ARMC9	1696	-0.195668	0.303946	0.0531743	0.339138
ARMCX1	925.465	0.0948167	0.203692	0.324399	0.710411
ARMCX2	2039.77	-0.0122966	0.1609	0.903391	0.974824
ARMCX3	3350.89	-0.0686609	0.165099	0.542879	0.84795
ARMCX4	1241.89	-0.090388	0.198294	0.35666	0.731841
ARMCX5	634.015	0.112146	0.197597	0.296707	0.688995
ARMCX5-GPRASP2	42.0371	0.0400606	0.195833	0.62455	0.885129
ARMCX6	673.299	-0.0897873	0.160876	0.377163	0.74777
ARNT	4488.1	-0.0185684	0.1627	0.856769	0.965253
ARNT2	925.967	-0.0122868	0.198858	0.820804	0.955662
ARNTL	1956.04	0.186437	0.175201	0.126232	0.497317
ARNTL2	1645	0.0368114	0.196733	0.628328	0.886093
ARPC1A	7949.94	-0.0866156	0.189377	0.386392	0.753484
ARPC1B	17223.3	0.197647	0.260414	0.0963804	0.445065
ARPC2	15356.2	0.268564	0.317069	0.0521261	0.336312
ARPC3	4946.35	0.308638	0.37226	0.0354671	0.27585
ARPC4	1412.8	0.206926	0.231432	0.10475	0.461527
ARPC5	6152.35	0.052722	0.194239	0.514898	0.83504
ARPC5L	1094.56	-0.112867	0.165256	0.315872	0.704702
ARPP19	2947.88	0.0619305	0.17579	0.551131	0.8512
ARPP21	38.1156	-0.0784748	0.229614	0.0231561	0.221083
ARRB1	2503.47	0.142569	0.213946	0.20126	0.597253
ARRB2	5394.15	0.227356	0.371332	0.024116	0.226061
ARRDC1	3603.89	-0.194367	0.255695	0.104959	0.46186
ARRDC2	1724.88	-0.0499797	0.171214	0.621259	0.884294
ARRDC3	4545.51	0.15386	0.242773	0.14156	0.515806
ARRDC4	1122.07	0.110763	0.226415	0.190497	0.585984
ARRDC5	310.456	1.37649	0.601344	0.000439036	0.0204134
ARSA	3471.68	-0.0165407	0.153916	0.910589	0.976494
ARSB	1515.04	0.108671	0.225316	0.198518	0.593744
ARSD	2412.36	-0.238524	0.284445	0.0669504	0.382392
ARSE	78.5269	-0.139537	0.273327	0.0199359	0.205519
ARSG	1224.87	-0.0908138	0.216772	0.249579	0.645616
ARSI	347.695	-0.0569188	0.211227	0.324554	0.710411
ARSJ	259.449	-0.0451443	0.173828	0.655714	0.897728
ARSK	423.222	0.0520358	0.182828	0.594925	0.8716
ART1	30.308	-0.055917	0.218387	0.102428	0.45732
ART3	1085.5	-0.0698688	0.218656	0.192703	0.58924
ART4	124.526	0.108601	0.243901	0.0478877	0.323122
ARTN	225.686	-0.0880848	0.23293	0.0325569	0.26405
ARV1	1460.07	-0.062965	0.195962	0.476087	0.814129
ARVCF	2188.46	-0.191627	0.32751	0.0203243	0.207248
ASAH1	17584.4	0.00305502	0.168161	0.994252	0.998791
ASAH2	89.6759	-0.0452932	0.206275	0.455	0.801807
ASAH2B	179.306	-0.120271	0.225676	0.198759	0.594056
ASAP1	11258.2	0.132596	0.182102	0.251075	0.647176
ASAP2	5140.52	-0.33485	0.326755	0.0315236	0.259343
ASAP3	2606.74	-0.0770103	0.209106	0.32984	0.714392
ASB1	764.203	-0.00210466	0.15525	0.98317	0.995596
ASB13	900.37	-0.0614518	0.206725	0.383855	0.752561
ASB14	19.7129	0.0304738	0.20981	0.433183	0.786847
ASB16	164.958	-0.0381071	0.212656	0.213842	0.612282
ASB16-AS1	624.403	-0.100586	0.190623	0.341829	0.720902
ASB2	370.27	1.74401	0.923928	0.000421828	0.0199291
ASB3	131.836	0.0744228	0.192899	0.443009	0.793136
ASB5	29.0253	-0.116998	0.260373	0.00128047	0.0418465
ASB6	1406.59	0.0109375	0.170912	0.915643	0.977486
ASB7	992.012	0.0244082	0.170689	0.810717	0.952502
ASB8	770.675	0.298485	0.264362	0.0423584	0.30419
ASB9	97.5856	-0.103038	0.204204	0.306734	0.69638
ASCC1	1456.47	0.0615114	0.162859	0.568203	0.858819
ASCC2	3437.07	-0.030179	0.154992	0.760691	0.936915
ASCC3	12010	0.0856903	0.192554	0.39308	0.758712
ASCL2	44.5461	0.14248	0.272069	0.0355365	0.276067
ASF1A	1317.54	0.27661	0.349712	0.0431989	0.306804
ASF1B	864.29	-0.114964	0.229562	0.173836	0.567133
ASGR1	112.917	0.0625677	0.202666	0.442314	0.792584
ASGR2	81.8533	0.225505	0.360339	0.032933	0.265423
ASH1L	28438.1	-0.108413	0.193652	0.309184	0.698203
ASH1L-AS1	284.535	-0.0829853	0.212106	0.298474	0.690704
ASH2L	4455.49	-0.0537624	0.20197	0.457337	0.803318
ASIC1	417.866	-0.0329448	0.20857	0.434538	0.786967
ASIC2	103.458	-0.0463982	0.213754	0.210842	0.608517
ASIC3	645.202	-1.08287	0.588464	0.00132176	0.0427935
ASIC4	48.1866	-0.0208495	0.209527	0.445139	0.794254
ASL	3142.32	-0.316206	0.426688	0.0278606	0.244886
ASMT	16.8109	0.0448574	0.210739	0.386293	0.753484
ASMTL	2998.59	0.115307	0.190908	0.300896	0.692072
ASMTL-AS1	404.46	-0.165564	0.231767	0.147626	0.52584
ASNA1	2755.99	0.0435335	0.15453	0.684421	0.907128
ASNS	2753.89	-0.131726	0.224914	0.187553	0.58352
ASNSD1	2766.1	0.193184	0.204398	0.122066	0.489448
ASPA	118.564	0.0543157	0.214341	0.240988	0.635398
ASPH	8370.15	0.0437126	0.200312	0.547691	0.849338
ASPHD1	208.026	-0.07609	0.228307	0.00753467	0.119852
ASPHD2	457.729	0.112231	0.215082	0.250715	0.646892
ASPM	16102.5	-0.0891182	0.221282	0.203536	0.598773
ASPN	7826.66	0.0135244	0.195232	0.854369	0.964596
ASPRV1	71.8196	0.0284198	0.190423	0.738341	0.928924
ASPSCR1	1717.7	-0.0891306	0.171782	0.41766	0.776458
ASRGL1	291.073	-0.125266	0.240891	0.127124	0.498572
ASS1	3462.61	-0.0878399	0.225929	0.138485	0.511537
ASTE1	754.423	0.0629198	0.17944	0.536926	0.84549
ASTL	22.0462	0.0171026	0.205528	0.720923	0.923448
ASTN2	1321.69	-0.0672254	0.218897	0.164501	0.551947
ASUN	4069.7	0.0163672	0.156952	0.86289	0.967697
ASXL1	47919.7	-0.0187085	0.155382	0.855481	0.964865
ASXL2	7098.59	0.149182	0.193399	0.210488	0.607814
ASXL3	205.821	0.151382	0.28044	0.02871	0.24898
ATAD1	2763.22	-0.075722	0.167993	0.483959	0.8173
ATAD2	10987.1	-0.0716642	0.214616	0.264465	0.660385
ATAD2B	5884.91	0.0149839	0.17721	0.879595	0.970148
ATAD3A	2921.52	-0.146643	0.233977	0.16483	0.552185
ATAD3B	3472.03	-0.375973	0.406653	0.0233566	0.221863
ATAD3C	1333.53	-0.0980044	0.240457	0.0112733	0.148113
ATAD5	2275.19	-0.0467474	0.182365	0.629717	0.886533
ATAT1	1423.29	-0.447861	0.288187	0.0111562	0.146941
ATE1	2483.94	0.0766724	0.163232	0.479426	0.815648
ATE1-AS1	38.1045	-0.0301004	0.199774	0.663759	0.900448
ATF1	1308.89	0.14365	0.205115	0.208166	0.604708
ATF2	4441.64	0.17011	0.195744	0.162136	0.548991
ATF3	597.722	-0.0507678	0.209885	0.354555	0.729609
ATF4	13313.5	0.00657534	0.176436	0.948254	0.985221
ATF5	1850.66	0.077163	0.209021	0.339265	0.71994
ATF6	8698.7	-0.0531532	0.143779	0.614371	0.880621
ATF6B	5307.25	-0.0859691	0.149354	0.42462	0.78117
ATF7	2139.4	0.081426	0.186554	0.423607	0.780585
ATF7IP	18061.9	0.121009	0.214047	0.236903	0.632114
ATF7IP2	1383.03	0.176414	0.235091	0.134441	0.505793
ATG10	596.367	0.000164085	0.177504	0.999723	0.999723
ATG101	1210.31	-0.0500078	0.170425	0.632599	0.887465
ATG12	1014.24	0.106571	0.178573	0.337924	0.718729
ATG13	4070.87	0.037784	0.163604	0.679237	0.905475
ATG14	1113.18	0.12972	0.186209	0.257388	0.653081
ATG16L1	1964.19	-0.047656	0.151825	0.653737	0.896796
ATG16L2	3904.43	0.0223832	0.164547	0.824392	0.956026
ATG2A	3715.02	0.00184501	0.176875	0.981398	0.99462
ATG2B	6118.35	0.04409	0.157219	0.695389	0.91257
ATG3	3561.25	0.171443	0.232279	0.144078	0.519677
ATG4A	895.373	0.0753213	0.178887	0.464935	0.806321
ATG4B	3109.01	-0.0957228	0.172939	0.380394	0.750324
ATG4C	1774.19	0.125608	0.243237	0.116259	0.4803
ATG4D	1525.57	-0.164335	0.239956	0.134912	0.506465
ATG5	1817.6	0.133516	0.207078	0.226957	0.623903
ATG7	2913.67	0.176621	0.254423	0.113095	0.474503
ATG9A	2686.18	-0.0763002	0.169364	0.479431	0.815648
ATG9B	125.383	-0.0809055	0.224007	0.143752	0.519472
ATHL1	13231.3	-0.0301515	0.206265	0.529094	0.842395
ATIC	4173.52	-0.0343056	0.166065	0.738814	0.929071
ATL1	545.32	-0.0598334	0.194191	0.50063	0.826273
ATL2	4628.6	-0.0729026	0.186935	0.459309	0.803318
ATL3	7037.55	0.00251042	0.183304	0.971842	0.992915
ATM	168046	0.631636	0.331622	0.00326278	0.0749363
ATMIN	5506.02	0.12364	0.218992	0.218067	0.61577
ATN1	28517.9	-0.188793	0.199132	0.126435	0.49772
ATOH8	188.086	0.0563869	0.216411	0.167084	0.555328
ATOX1	2389.52	0.203014	0.268017	0.0855138	0.421521
ATP10A	3461.54	-0.0244684	0.171777	0.804273	0.950067
ATP10B	22.829	-0.0287692	0.204064	0.62384	0.885129
ATP10D	4265.15	0.122161	0.226633	0.181845	0.576625
ATP11A	11404.4	-0.0379696	0.174586	0.701389	0.915698
ATP11B	10774	0.103912	0.223802	0.215834	0.614155
ATP11C	5894.25	0.0470553	0.195099	0.571668	0.860133
ATP13A1	8925.42	-0.207574	0.194008	0.100865	0.453958
ATP13A2	6016.98	0.0312116	0.176523	0.752186	0.934308
ATP13A3	18585	-0.110114	0.206998	0.273743	0.667783
ATP13A4	823.678	-0.0056368	0.200726	0.916595	0.977574
ATP13A5	2063.66	-0.0687982	0.216947	0.231434	0.62758
ATP1A1	21854.2	0.0158043	0.180698	0.868263	0.968848
ATP1A1-AS1	117.759	0.173807	0.263495	0.104586	0.461373
ATP1A2	234.847	-0.0114987	0.207291	0.720062	0.922957
ATP1A3	869.698	0.05351	0.21481	0.221334	0.619299
ATP1A4	78.1711	-0.0384558	0.211803	0.269194	0.664588
ATP1B1	14242.9	-0.434177	0.574362	0.0149985	0.175494
ATP1B2	145.148	0.0228051	0.207986	0.536815	0.84549
ATP1B3	4604.93	-0.113394	0.194538	0.293667	0.686988
ATP2A1	346.638	-0.606573	0.47643	0.0078201	0.122557
ATP2A2	21409.6	-0.015324	0.179165	0.933326	0.982059
ATP2A3	9196.81	0.121767	0.214519	0.235875	0.632075
ATP2B1	8304.76	0.0796142	0.209518	0.327071	0.71232
ATP2B2	119.09	-0.240524	0.452592	0.00515741	0.0955338
ATP2B4	13778.9	-0.0205386	0.181181	0.828748	0.957765
ATP2C1	12435.9	-0.193498	0.224232	0.11914	0.484903
ATP2C2	1102.41	-0.0702985	0.225459	0.0117995	0.152752
ATP5A1	16055.4	0.149636	0.196309	0.196472	0.591593
ATP5B	16146.7	0.0285152	0.165279	0.785208	0.944129
ATP5C1	9729.34	0.0471439	0.176662	0.640131	0.891708
ATP5D	1340.7	0.0417058	0.1786	0.672871	0.903443
ATP5E	238.419	0.215972	0.279752	0.0805954	0.413465
ATP5EP2	352.566	0.257633	0.317572	0.0551558	0.345315
ATP5F1	3784.76	0.244214	0.311063	0.0561133	0.348423
ATP5G1	883.099	-0.0793629	0.182479	0.443954	0.793522
ATP5G2	2502.88	0.194795	0.204182	0.12369	0.491987
ATP5G3	2786.66	0.0271995	0.177966	0.77472	0.941638
ATP5H	2594.63	0.00934266	0.163922	0.928813	0.981112
ATP5I	2590.65	0.00394829	0.181698	0.96236	0.989254
ATP5J	2844.1	0.0366965	0.168969	0.724335	0.923769
ATP5J2	415.611	-0.0349113	0.164128	0.741222	0.929656
ATP5L	5836.04	0.163822	0.240812	0.128573	0.500081
ATP5L2	201.168	-0.00975375	0.179061	0.916119	0.977515
ATP5O	4134.54	0.10311	0.177603	0.346457	0.724154
ATP5S	558	0.0216999	0.170106	0.837031	0.959176
ATP5SL	641.896	-0.0212549	0.161144	0.835748	0.959111
ATP6AP1	11396.1	-0.131408	0.19629	0.262311	0.658751
ATP6AP1L	263.481	-0.149789	0.252063	0.115412	0.479192
ATP6AP2	8077.11	0.0772929	0.194627	0.411574	0.772225
ATP6V0A1	5376.56	0.0535849	0.17781	0.59681	0.871872
ATP6V0A2	2776.53	0.0885887	0.191279	0.395296	0.760414
ATP6V0A4	50.2742	-0.0902775	0.237448	0.0097025	0.138643
ATP6V0B	3718.52	-0.000392818	0.188156	0.99863	0.9997
ATP6V0C	15399.4	0.0552433	0.183031	0.585639	0.866989
ATP6V0D1	2742.93	0.179698	0.25705	0.105799	0.463139
ATP6V0D2	120.28	0.0473711	0.214705	0.176146	0.570028
ATP6V0E1	4595.12	0.131356	0.212194	0.226393	0.62328
ATP6V0E2	1031.16	0.0296403	0.195391	0.698611	0.914348
ATP6V1A	5197.63	0.153864	0.185237	0.201206	0.597253
ATP6V1B1	1473.4	-0.14492	0.282648	0.00457035	0.0893814
ATP6V1B2	7116.02	0.16211	0.265142	0.0903239	0.433832
ATP6V1C1	5389.67	0.14155	0.186241	0.220055	0.617668
ATP6V1C2	269.534	-0.934137	0.669337	0.00310893	0.0727682
ATP6V1D	1511.84	0.0367393	0.169591	0.728266	0.925074
ATP6V1E1	2683.29	0.0484017	0.165796	0.653918	0.896965
ATP6V1E2	106.593	-0.0254192	0.182661	0.783054	0.943896
ATP6V1F	3340.02	0.139271	0.204912	0.221399	0.619299
ATP6V1G1	2144.6	-0.00185135	0.171167	0.979003	0.994321
ATP6V1G2	36.5262	0.030166	0.202818	0.632932	0.88774
ATP6V1H	2690.52	0.0774617	0.168921	0.481493	0.816518
ATP7A	3227.97	0.177892	0.203214	0.145393	0.521303
ATP7B	1278.5	-0.136105	0.26614	0.0259407	0.236005
ATP8A1	3898.73	0.993687	0.330809	0.000112699	0.00866987
ATP8A2	100.178	-0.130528	0.268201	0.0067508	0.112591
ATP8B1	4805.68	-0.177446	0.276656	0.0780053	0.408863
ATP8B2	6339.31	0.132932	0.233607	0.163703	0.550754
ATP8B3	541.832	0.14655	0.207043	0.20247	0.598104
ATP8B4	1800.72	0.0780146	0.216019	0.256675	0.65285
ATP9A	7522.17	-0.0925357	0.213789	0.271502	0.666808
ATP9B	3636.89	0.0963249	0.178862	0.378114	0.74865
ATPAF1	1211.46	0.0981511	0.160351	0.377401	0.747833
ATPAF2	516.246	0.096349	0.186218	0.365616	0.73955
ATPIF1	1656.18	0.101724	0.176508	0.356323	0.731661
ATR	70872	-0.0483641	0.176043	0.55129	0.851223
ATRAID	2249.59	0.0512776	0.154931	0.634992	0.889531
ATRIP	840.225	-0.129707	0.204191	0.237912	0.632854
ATRN	5388.91	-0.0126918	0.176544	0.875642	0.969455
ATRNL1	504.528	-0.00225735	0.205951	0.935678	0.982309
ATRX	123936	0.124985	0.180715	0.274055	0.668264
ATXN1	6874.93	0.0821709	0.18532	0.421641	0.779192
ATXN10	5112.2	0.000284593	0.176837	0.998662	0.9997
ATXN1L	3890.25	0.154279	0.207605	0.183986	0.579175
ATXN2	8911.47	-0.0428334	0.152451	0.683322	0.907003
ATXN2L	29632.7	-0.00520725	0.149829	0.940062	0.983745
ATXN3	2055.61	0.0572968	0.153868	0.59552	0.871612
ATXN7	5984.96	0.134803	0.177558	0.239851	0.634518
ATXN7L1	1890.18	0.19113	0.244384	0.114069	0.476678
ATXN7L2	546.776	0.0304614	0.174653	0.760725	0.936915
ATXN7L3	2441.38	-0.0364845	0.15152	0.723995	0.923769
ATXN7L3B	1080.55	0.024168	0.172373	0.814234	0.95367
AUH	1215.41	0.0451258	0.171168	0.660491	0.899271
AUNIP	266.071	-0.107368	0.238735	0.0866964	0.424201
AUP1	4201.48	-0.153745	0.180239	0.186852	0.583155
AURKA	7446	-0.0996721	0.223178	0.204071	0.599423
AURKAIP1	2100.36	0.0403875	0.180226	0.678684	0.905155
AURKB	838.467	-0.0542716	0.198445	0.500888	0.826462
AURKC	96.0902	0.0498226	0.193628	0.570639	0.859606
AUTS2	15914.5	-0.146727	0.219702	0.183201	0.578621
AVEN	652.107	-0.0438267	0.189302	0.618064	0.882166
AVIL	1071.7	-0.247932	0.319822	0.0529899	0.338458
AVL9	3234.77	-0.0874829	0.180803	0.419469	0.777494
AVPI1	181.571	-0.0293061	0.205237	0.565709	0.857087
AVPR1A	221.587	-0.0930704	0.219754	0.22956	0.626256
AVPR2	44.2686	0.097433	0.238192	0.0443509	0.309797
AXDND1	55.5778	-0.121776	0.238227	0.146289	0.52279
AXIN1	4929.62	-0.108853	0.173667	0.353207	0.729313
AXIN2	1038.24	-0.0686883	0.200027	0.42888	0.783987
AXL	40162.5	0.142688	0.207364	0.208718	0.605514
AZGP1	16511.1	-0.0940097	0.240213	0.000896906	0.0328718
AZGP1P1	29.3943	-0.05877	0.217054	0.232795	0.628702
AZI2	2933.36	0.234573	0.220602	0.0780883	0.409052
AZIN1	14376.9	-0.00627374	0.190673	0.932711	0.982013
AZIN2	907.616	-0.552027	0.352067	0.00681984	0.112709
AZU1	78.7347	-0.032682	0.207702	0.493001	0.822421
B2M	60665.9	0.9076	0.396565	0.000830492	0.0311856
B3GALNT1	1189.6	-0.104508	0.190814	0.325979	0.711815
B3GALNT2	4242.75	-0.136425	0.233073	0.163557	0.550754
B3GALT1	28.1006	0.0194948	0.209402	0.523298	0.839072
B3GALT4	739.453	0.00971166	0.179996	0.92099	0.978808
B3GALT5	236.798	-1.51217	1.32899	0.00167994	0.0503576
B3GALT6	254.338	0.00104762	0.189798	0.998672	0.9997
B3GALTL	764.005	-0.0129115	0.177551	0.897936	0.973752
B3GAT1	86.9163	2.1409	0.88358	0.000128592	0.00927679
B3GAT3	1750.66	0.0171028	0.1495	0.882537	0.970695
B3GNT1	739.827	0.0165591	0.178272	0.864675	0.96808
B3GNT2	2841.7	0.0842668	0.196536	0.370098	0.742821
B3GNT3	1000.25	0.00253858	0.206782	0.926215	0.980499
B3GNT4	50.6785	-0.0854221	0.2295	0.0789603	0.410549
B3GNT5	1384.16	-0.0234348	0.203577	0.661881	0.899864
B3GNT7	464.822	0.133859	0.248322	0.109107	0.467108
B3GNT8	301.412	0.00391694	0.196004	0.94708	0.985221
B3GNT9	866.779	0.0142315	0.190208	0.863158	0.967872
B3GNTL1	350.839	-0.00839655	0.169599	0.930615	0.981717
B4GALNT1	218.332	-0.00595696	0.196644	0.908531	0.976208
B4GALNT2	35.0453	-0.0349845	0.214121	0.116322	0.480374
B4GALNT3	3872.03	-0.19829	0.380648	6.82759e-05	0.00628066
B4GALNT4	3798.53	-0.0931738	0.238607	0.00859804	0.12804
B4GALT1	15661.4	-0.0819653	0.227659	0.065173	0.377322
B4GALT2	3286.04	-0.0571845	0.204002	0.440453	0.791413
B4GALT3	3721.38	-0.119661	0.193335	0.280227	0.674142
B4GALT4	1594.88	-0.100974	0.193389	0.332142	0.716576
B4GALT5	3778.98	0.0225025	0.185409	0.795343	0.94676
B4GALT6	267.061	0.0466467	0.190328	0.599999	0.873021
B4GALT7	1554.49	0.00614256	0.157265	0.953325	0.986899
B9D1	297.068	-0.186881	0.214201	0.131772	0.503254
B9D2	177.556	-0.0270047	0.187564	0.750141	0.933101
BAALC	87.1868	0.188058	0.339583	0.00777868	0.122168
BAAT	30.384	-0.0547787	0.216484	0.172078	0.564337
BABAM1	3028.59	0.0625606	0.154427	0.557763	0.852883
BACE1	900.375	0.0285429	0.183207	0.758289	0.935738
BACE1-AS	74.7217	0.0258547	0.19368	0.743966	0.930613
BACE2	4705.54	-0.00255709	0.198321	0.965442	0.990392
BACH1	4286.12	0.0989214	0.204345	0.316971	0.705411
BACH2	1152.94	0.102633	0.238307	0.0634019	0.373157
BAD	945.979	0.0560165	0.173199	0.591722	0.870156
BAG1	4926.6	-0.0801734	0.220888	0.207076	0.603557
BAG2	613.385	0.018028	0.190073	0.827658	0.957471
BAG3	4684.72	-0.164599	0.257707	0.105817	0.463139
BAG4	2746.77	-0.0950555	0.214618	0.264379	0.660385
BAG5	1985.55	0.0779443	0.154537	0.47103	0.810744
BAG6	13524.7	-0.0540892	0.170648	0.625874	0.885382
BAHCC1	2615.33	-0.0950193	0.203307	0.322281	0.709383
BAHD1	2849.69	-0.0144734	0.164129	0.885422	0.971829
BAI1	660.795	0.0258313	0.206467	0.587817	0.868146
BAI2	1320.07	-0.207201	0.325105	0.0411543	0.299001
BAI3	99.5522	-0.00892228	0.201559	0.871302	0.969214
BAIAP2	2807.46	-0.0777565	0.208903	0.338799	0.719288
BAIAP2-AS1	316.061	-0.00254066	0.180642	0.974966	0.993824
BAIAP2L1	3720.28	-0.127051	0.258429	0.0265569	0.239138
BAIAP2L2	143.753	-0.014652	0.199252	0.818141	0.954964
BAIAP3	1649.59	-0.0426611	0.213517	0.180262	0.575008
BAK1	1232.38	0.15452	0.203158	0.188064	0.58352
BAMBI	1096.77	0.142917	0.251232	0.10976	0.468319
BANF1	1896.58	-0.0120804	0.17391	0.899204	0.973752
BANK1	2225.71	1.46154	0.867818	0.00079992	0.0305065
BANP	2331	-0.0303354	0.160921	0.774097	0.941245
BAP1	14838.2	-0.0335241	0.153953	0.761226	0.936986
BARD1	2624.18	-0.0135543	0.162366	0.889488	0.972137
BARX2	455.509	-0.129581	0.249272	0.0939093	0.441272
BASP1	761.625	0.639145	0.435573	0.0058974	0.103777
BATF	276.377	0.454538	0.439742	0.0163105	0.1839
BATF2	359.387	0.0862752	0.227571	0.109351	0.467577
BATF3	156.899	-0.0218154	0.198224	0.748583	0.931849
BAX	2955.48	0.0314035	0.168012	0.763934	0.937918
BAZ1A	10044.6	0.0700455	0.180837	0.49977	0.825874
BAZ1B	14986.1	-0.011797	0.149842	0.971387	0.992684
BAZ2A	15851.7	0.0369127	0.146613	0.733698	0.926869
BAZ2B	12087.8	0.0100523	0.168405	0.927818	0.980909
BBC3	283.177	-0.0647129	0.192545	0.48431	0.81739
BBIP1	769.883	0.29847	0.267975	0.0433258	0.307116
BBOX1	518.188	-0.214039	0.406479	0.000894541	0.0328718
BBS1	1952.37	-0.0844163	0.189848	0.405968	0.766442
BBS10	1368.71	0.156097	0.219852	0.172813	0.565293
BBS12	410.117	0.0878431	0.207262	0.331785	0.716576
BBS2	2904.43	0.100487	0.212683	0.27363	0.667783
BBS4	948.182	0.00419195	0.176609	0.968043	0.991519
BBS5	548.618	0.125642	0.200747	0.254607	0.651208
BBS7	1197	-0.0682669	0.16069	0.524979	0.840051
BBS9	2436.6	0.0437292	0.187686	0.632083	0.887441
BBX	4617.62	0.181731	0.221262	0.138193	0.510981
BCAM	18047.5	-0.16493	0.296719	0.0193415	0.202411
BCAN	90.9502	0.00559168	0.209298	0.779389	0.942938
BCAP29	3047.91	-0.095428	0.197753	0.347637	0.724519
BCAP31	5102.11	-0.118619	0.206788	0.258242	0.653632
BCAR1	4612.41	-0.568657	0.270594	0.00289037	0.0702908
BCAR3	1194.72	0.0548495	0.16383	0.605545	0.876102
BCAS1	949.487	-0.012132	0.209203	0.594	0.870938
BCAS2	1207.5	0.194274	0.247216	0.115143	0.479017
BCAS3	3267.66	0.0977036	0.175093	0.375319	0.746419
BCAS4	622.452	0.0324236	0.2094	0.407797	0.767976
BCAT1	1380.13	0.100366	0.218949	0.245605	0.642017
BCAT2	1476.97	-0.0575035	0.199036	0.468275	0.808609
BCCIP	2614.84	0.0361576	0.181078	0.710383	0.919436
BCDIN3D	284.631	-0.0194719	0.184291	0.827964	0.957541
BCDIN3D-AS1	16.0454	0.0280846	0.209011	0.487465	0.819038
BCHE	59.8047	0.00037202	0.207393	0.992776	0.998519
BCKDHA	2858.99	0.00956332	0.162752	0.915176	0.977486
BCKDHB	1419.63	-0.00467012	0.172197	0.957681	0.987609
BCKDK	2845.66	0.0516074	0.14614	0.613924	0.880347
BCL10	1484.61	0.164609	0.245983	0.129899	0.501592
BCL11A	1041.93	0.0724409	0.22536	0.0291357	0.25015
BCL11B	1753.08	2.84151	0.574653	5.10233e-09	4.22424e-06
BCL2	3813.46	0.05407	0.205459	0.436361	0.788708
BCL2A1	730.537	1.80518	0.780581	0.000206429	0.0125052
BCL2L1	3267.03	-0.0151299	0.17384	0.880807	0.970272
BCL2L11	2005.28	0.025207	0.181628	0.787404	0.944424
BCL2L12	875.652	-0.0529568	0.191163	0.554071	0.851529
BCL2L13	2239.19	0.000920918	0.177972	0.995529	0.999139
BCL2L14	112.774	0.127232	0.250711	0.0814491	0.414299
BCL2L15	25.7899	0.0636043	0.210887	0.36008	0.734556
BCL2L2	543.079	-0.153304	0.230864	0.157633	0.541621
BCL3	4187.65	0.0329503	0.183834	0.722264	0.923474
BCL6	24246.7	0.0739022	0.190579	0.45442	0.801192
BCL6B	1069.81	-0.158165	0.23491	0.149765	0.52966
BCL7A	624.388	0.00669922	0.196562	0.913885	0.977486
BCL7B	1452.26	0.0459017	0.172381	0.651849	0.896177
BCL7C	1497.28	0.0432586	0.164971	0.682913	0.907003
BCL9	5829.9	-0.465767	0.328879	0.0121379	0.155241
BCL9L	15375.8	-0.0664004	0.181945	0.489342	0.819887
BCLAF1	10622.8	0.0664331	0.185234	0.504253	0.828448
BCMO1	27.2079	-0.0286039	0.20993	0.418708	0.777148
BCO2	282.589	0.0241648	0.194699	0.754767	0.93494
BCOR	35908.2	0.0436886	0.195864	0.591025	0.869916
BCORL1	17028.2	-0.243704	0.280676	0.0685652	0.385611
BCR	41954.6	-0.143862	0.237511	0.14933	0.528985
BCRP3	250.437	-0.056504	0.198867	0.488812	0.81962
BCS1L	1445.8	-0.250176	0.251408	0.0663857	0.381644
BDH1	965.886	-0.0640988	0.215296	0.243825	0.639194
BDH2	887.406	0.0429135	0.187468	0.637742	0.891124
BDKRB1	74.6485	-0.0696235	0.218053	0.218241	0.61577
BDKRB2	533.809	-0.349465	0.539895	0.0190945	0.201573
BDNF	85.916	-0.68675	1.99489	0.00750182	0.119767
BDNF-AS	43.9609	-0.0199648	0.201526	0.740559	0.929098
BDP1	16529.3	-0.0510599	0.188985	0.571661	0.860133
BEAN1	67.4483	-0.00438482	0.201176	0.962625	0.989254
BECN1	3772.39	0.0579719	0.154614	0.589885	0.86972
BEGAIN	151.667	-0.130715	0.261507	0.0317748	0.260337
BEND3	729.052	-0.0741828	0.212402	0.30167	0.692225
BEND4	63.7219	2.60957	1.46461	0.00032775	0.0172767
BEND5	155.023	0.0457337	0.213211	0.242309	0.636659
BEND6	168.94	0.0398502	0.208672	0.419298	0.777494
BEND7	342.277	0.0208564	0.175071	0.83426	0.958745
BEST1	433.734	0.116988	0.224939	0.201714	0.597897
BEST3	32.7419	-2.53168	1.04147	0.000416641	0.0198458
BEST4	18.8284	-0.0714588	0.21799	0.244798	0.640684
BET1	1003.89	0.0546953	0.179923	0.583786	0.866372
BET1L	571.735	-0.0670832	0.160339	0.534096	0.843473
BEX2	416.318	-0.0231448	0.205833	0.618933	0.882904
BEX4	437.852	0.0967145	0.20193	0.331636	0.716518
BEX5	44.7746	-0.0203763	0.204385	0.699147	0.914509
BFAR	2471.47	-0.0213233	0.145923	0.835271	0.959111
BFSP1	96.3896	-0.34543	0.515136	0.0224399	0.218106
BFSP2	22.9123	-0.0106982	0.208208	0.711045	0.919696
BGN	29799	-0.165531	0.259462	0.102353	0.457317
BHLHA15	514.977	-0.0593266	0.211784	0.311145	0.699895
BHLHB9	387.53	-0.00108919	0.161202	0.989618	0.997033
BHLHE22	70.5376	0.106153	0.238058	0.0998898	0.451673
BHLHE40	9442.73	-0.206291	0.309905	0.0537744	0.341317
BHLHE40-AS1	121.206	-0.122545	0.233642	0.165424	0.552876
BHLHE41	2297.62	0.0656222	0.210668	0.333184	0.716576
BHMT	31.8587	-0.031864	0.212688	0.165624	0.553249
BHMT2	115.851	0.0363553	0.200907	0.597324	0.871903
BICC1	3506.87	0.0287788	0.200508	0.64897	0.895456
BICD1	3259.91	-0.578126	0.30622	0.0037919	0.0804958
BICD2	4332.43	-0.0337029	0.177355	0.726846	0.924907
BID	896.533	0.141511	0.225562	0.184056	0.579289
BIK	222.718	-0.068508	0.213319	0.291046	0.6838
BIN1	2049.22	0.159122	0.280251	0.0459356	0.316668
BIN2	2659.13	1.16545	0.708477	0.00149555	0.0470193
BIN3	674.743	0.0311779	0.177384	0.743008	0.930553
BIRC2	4653.65	0.0582608	0.183975	0.553152	0.851372
BIRC3	5739.27	1.01844	0.785366	0.00254531	0.0652695
BIRC5	687.682	-0.056898	0.207531	0.388964	0.755624
BIRC6	47831.4	0.10164	0.15661	0.360574	0.734951
BIRC7	70.2234	0.0075593	0.207996	0.805883	0.950401
BIVM	84.2196	0.0267638	0.184972	0.770228	0.939931
BLCAP	1655.81	-0.25372	0.215631	0.0627165	0.370624
BLID	29.0527	0.0290776	0.207124	0.549419	0.850233
BLK	593.511	2.0011	1.14444	0.000362536	0.0183228
BLM	2086.21	0.031666	0.192801	0.697347	0.913576
BLMH	1776.92	0.138944	0.214806	0.205348	0.60092
BLNK	2017.85	0.185012	0.274946	0.0862226	0.423345
BLOC1S1	194.213	0.114684	0.223351	0.217632	0.615477
BLOC1S2	1107.62	0.233469	0.311468	0.0618242	0.367675
BLOC1S3	298.375	0.0162123	0.178335	0.86528	0.968186
BLOC1S4	361.481	0.0806053	0.182625	0.438876	0.790434
BLOC1S5	22.4695	-0.0121859	0.200254	0.841653	0.960269
BLOC1S6	1080.65	0.215364	0.260056	0.0872512	0.425989
BLVRA	1012.81	0.136833	0.210063	0.216825	0.614592
BLVRB	2556.63	0.0455429	0.200451	0.53522	0.84432
BLZF1	2743.99	-0.176623	0.195054	0.153203	0.534792
BMF	775.189	0.0992215	0.227888	0.158126	0.542671
BMI1	49.5273	-0.028904	0.19658	0.699879	0.914963
BMP1	9978.94	-0.11139	0.24098	0.0808115	0.413497
BMP2	155.894	0.0298257	0.203217	0.609648	0.87852
BMP2K	11156.5	0.143607	0.259095	0.0811491	0.414211
BMP4	367.799	0.00578125	0.192128	0.930967	0.981785
BMP5	50.978	0.0280209	0.208197	0.507667	0.830646
BMP6	381.839	0.151959	0.222141	0.176981	0.570871
BMP7	126.326	0.0356479	0.208658	0.423996	0.780797
BMP8A	747.888	-1.49303	0.69372	0.000432365	0.0203165
BMP8B	643.386	-0.975532	0.577324	0.00199073	0.0573943
BMPER	98.2477	0.00666553	0.207803	0.806089	0.950401
BMPR1A	3570.92	-0.206351	0.229172	0.097063	0.446438
BMPR1B	6536.05	-0.0906797	0.237897	0.000593233	0.0243829
BMPR2	11159.1	-0.107014	0.167417	0.337043	0.718683
BMS1	8872	-0.107977	0.163264	0.332916	0.716576
BMS1P20	2339.77	-0.0619873	0.153523	0.56126	0.854166
BMX	112.061	0.122726	0.25685	0.0250019	0.230235
BNC1	190.166	-0.0388828	0.211927	0.286246	0.679316
BNC2	2027.13	0.0232224	0.197235	0.739483	0.929098
BNIP1	275.535	0.0655825	0.176519	0.5309	0.843231
BNIP2	4411.98	0.216013	0.246352	0.0937593	0.441044
BNIP3	1511.05	0.0964952	0.195044	0.347946	0.724519
BNIP3L	2687.81	0.109877	0.231927	0.1548	0.536659
BNIPL	146.385	-0.114529	0.24801	0.0440939	0.308829
BOC	2783.34	-0.0186835	0.195924	0.782903	0.943896
BOD1	1541.57	-0.0452726	0.178938	0.64609	0.893985
BOD1L1	14236.7	0.11584	0.201463	0.282771	0.676304
BOK	450.501	-0.113659	0.23485	0.140212	0.514186
BOLA1	439.678	-0.170739	0.266709	0.0954376	0.443898
BOLA2	679.765	0.0127885	0.185567	0.8844	0.971332
BOLA3	391.931	-0.0228066	0.194043	0.75622	0.935309
BOP1	1794.68	-0.0495579	0.200789	0.501289	0.826529
BORA	1459.34	-0.0116849	0.168834	0.905604	0.975033
BPGM	796.351	-0.0508153	0.202156	0.492325	0.821916
BPHL	838.718	-0.457132	0.375645	0.0143104	0.171587
BPI	161.971	0.0495443	0.217202	0.0569287	0.351853
BPIFB1	111.802	-0.113205	0.258051	0.000143003	0.009945
BPNT1	2515.14	-0.0777655	0.185534	0.43687	0.78897
BPTF	25752.2	0.0693752	0.185046	0.447192	0.795357
BRAF	25968.8	-0.0355042	0.168044	0.728116	0.925074
BRAP	1661.59	0.107465	0.204265	0.297781	0.689544
BRAT1	2209.53	-0.166078	0.194643	0.167861	0.55677
BRCA1	26196.7	-0.105795	0.218485	0.232473	0.628582
BRCA2	28123.4	-0.0324644	0.184434	0.717781	0.922536
BRCC3	1835.38	-0.145538	0.164524	0.185567	0.581797
BRD1	6518.86	-0.135446	0.182791	0.2544	0.650934
BRD2	24055.8	0.0595154	0.164392	0.578884	0.863311
BRD3	3807.89	-0.0776497	0.182988	0.461023	0.80438
BRD4	19514.8	-0.0113978	0.150629	0.898333	0.973752
BRD7	4002.55	0.21962	0.242991	0.0911887	0.43604
BRD8	3447.35	-0.220195	0.197205	0.0863833	0.42379
BRD9	3225.61	-0.192371	0.210497	0.123147	0.491123
BRE	2470.27	0.267791	0.222783	0.0522693	0.3365
BRF1	2409.4	-0.0980924	0.193331	0.343928	0.722603
BRF2	1153.49	-0.0438702	0.203542	0.501649	0.82697
BRI3	5921.96	0.102083	0.220935	0.222761	0.620354
BRI3BP	1104.97	0.0295507	0.18226	0.753547	0.93471
BRICD5	194.542	-0.055085	0.195464	0.522641	0.838708
BRINP2	27.9144	0.00378406	0.210154	0.77271	0.941008
BRINP3	11685.9	-0.0270453	0.21299	0.00261722	0.0662235
BRIP1	11714.8	-0.0694658	0.202811	0.398745	0.762022
BRIX1	2641.08	-0.0154177	0.172285	0.876242	0.969599
BRK1	3067.66	0.148261	0.184028	0.208287	0.604847
BRMS1	1406.35	0.0185682	0.180163	0.852283	0.964301
BRMS1L	494.106	0.00847552	0.180491	0.928502	0.981078
BROX	5352.65	-0.0181973	0.16073	0.862743	0.967656
BRPF1	2737.95	0.0411845	0.155857	0.697329	0.913576
BRPF3	5041.03	-0.159712	0.207669	0.173602	0.566998
BRSK1	1170.1	-0.101303	0.228456	0.160003	0.546227
BRSK2	291.564	-0.0131761	0.209157	0.580481	0.863765
BRWD1	21767.2	-0.106478	0.161825	0.338358	0.719135
BRWD1-IT2	24.9136	-0.0994949	0.239767	0.0456955	0.315639
BRWD3	9498.07	0.132559	0.1988	0.240782	0.635398
BSCL2	71.4217	-0.0744563	0.207715	0.360105	0.734556
BSDC1	2697.92	-0.00905148	0.15117	0.933704	0.982059
BSG	12787.6	-0.200299	0.21675	0.110285	0.4695
BSN	934.15	-0.0543461	0.214637	0.216697	0.614592
BSPRY	1038.57	-0.151931	0.294394	0.00154819	0.0476068
BST1	373.504	0.19047	0.279771	0.0826991	0.416876
BST2	7492.21	0.0169814	0.197895	0.787894	0.944424
BTAF1	14149.6	0.00738555	0.162875	0.945435	0.985135
BTBD1	3871.08	0.295696	0.298293	0.0467271	0.320252
BTBD10	2526.18	0.0383338	0.16302	0.711553	0.919789
BTBD11	316.945	0.479734	0.845548	0.011011	0.145802
BTBD16	119.628	-0.0966593	0.239224	0.0233676	0.221863
BTBD19	1701.66	-0.31975	0.411389	0.0292261	0.250308
BTBD2	5335.57	0.122326	0.167709	0.278863	0.672467
BTBD3	1218.55	-0.292249	0.258191	0.0444074	0.310012
BTBD6	2254.36	-0.0604212	0.174891	0.565336	0.857087
BTBD7	4237.18	0.0197015	0.167351	0.842198	0.96063
BTBD8	266.964	-0.0782191	0.192185	0.423566	0.780585
BTBD9	2206.36	0.00589011	0.170385	0.956023	0.987252
BTC	190.783	-0.0177178	0.207836	0.607204	0.876814
BTD	665.568	-0.00708465	0.177393	0.940492	0.983745
BTF3	6965.9	0.21012	0.266196	0.0853995	0.421521
BTF3L4	1160.81	0.0716165	0.156375	0.51499	0.83504
BTG1	3644.64	1.05069	0.273182	5.75566e-06	0.00108769
BTG2	4031.45	-0.0741118	0.166724	0.486554	0.81874
BTG3	1573.23	0.0111412	0.181036	0.916174	0.977515
BTK	12872.7	1.0081	0.74142	0.00257145	0.0654718
BTLA	525.135	2.59471	0.901077	1.51605e-05	0.00217835
BTN2A1	3910.9	0.115504	0.188635	0.308797	0.698055
BTN2A2	2485.8	0.869544	0.654438	0.00350168	0.0770635
BTN2A3P	331.563	0.112654	0.205219	0.28033	0.674297
BTN3A1	6722.47	0.860689	0.55581	0.00294745	0.0706949
BTN3A2	3868.82	0.829908	0.562868	0.00344746	0.0766465
BTN3A3	4885.28	0.808518	0.511558	0.00324288	0.0745776
BTNL10	97.0137	-0.012127	0.208836	0.72769	0.925074
BTNL9	425.5	-0.0188877	0.206023	0.651145	0.896059
BTRC	1968.49	-0.0729988	0.197862	0.418823	0.777208
BUB1	4073.65	-0.0552829	0.201154	0.470483	0.810241
BUB1B	2485.78	-0.105819	0.22575	0.188019	0.58352
BUB3	5759.94	0.053404	0.163596	0.611611	0.879162
BUD13	1370	0.0729164	0.189314	0.459233	0.803318
BUD31	1882.23	0.051892	0.155095	0.629976	0.886576
BVES	242.765	0.00782211	0.194455	0.923063	0.97979
BYSL	800.705	-0.125524	0.225323	0.193385	0.589634
BZRAP1	2239.96	0.0183835	0.183524	0.844693	0.961429
BZRAP1-AS1	512.166	1.71395	0.507537	1.54439e-05	0.00220088
BZW1	7669.98	-0.0133143	0.172458	0.890086	0.972137
BZW2	3082.79	-0.138551	0.238663	0.14616	0.522717
C10orf10	1884.21	0.0261032	0.189868	0.752017	0.934298
C10orf107	21.0209	-0.000865487	0.206958	0.978098	0.994275
C10orf11	549.634	0.125794	0.217324	0.21991	0.617668
C10orf111	17.566	-0.0266557	0.203823	0.649841	0.895721
C10orf113	216.147	-0.0505674	0.217293	0.0473211	0.321235
C10orf12	1658.01	0.0496042	0.164247	0.639629	0.891485
C10orf128	395.937	1.15208	0.423246	0.000219041	0.0129975
C10orf131	134.382	0.00424923	0.193202	0.956657	0.9874
C10orf2	838.331	-0.0493108	0.19641	0.544614	0.848066
C10orf25	28.1326	0.0143374	0.199202	0.830893	0.958295
C10orf32	44.4095	0.0916962	0.213692	0.294456	0.687355
C10orf35	220.049	-0.0185696	0.206433	0.650521	0.895721
C10orf54	1534	1.0261	0.525692	0.00129812	0.0423436
C10orf55	22.1313	-0.0281584	0.210357	0.391061	0.757715
C10orf67	75.5054	-0.0811877	0.234102	0.000183179	0.0116657
C10orf71	73.3621	-0.037599	0.215325	0.0358063	0.277791
C10orf76	2359.67	0.0978165	0.158918	0.375878	0.746419
C10orf82	56.3615	-0.0530981	0.219593	0.0091072	0.132389
C10orf88	893.724	0.0334734	0.158317	0.753064	0.934597
C10orf90	91.9182	-0.0178648	0.207436	0.644318	0.893738
C10orf91	27.279	0.0161092	0.202947	0.77611	0.941902
C11orf1	629.387	0.0713379	0.185488	0.477365	0.814393
C11orf21	440.587	1.56623	0.763176	0.000462721	0.0210599
C11orf24	3577.09	-0.213813	0.1984	0.0942204	0.441879
C11orf30	5073.15	0.00177834	0.145796	0.98348	0.9956
C11orf31	1756.59	0.0481147	0.178425	0.62166	0.884395
C11orf45	54.7041	0.0849296	0.214159	0.292459	0.68561
C11orf48	1208.18	-0.0191344	0.162068	0.852078	0.964301
C11orf49	1223.37	-0.0830629	0.18451	0.423837	0.780766
C11orf54	1276.46	0.0911481	0.191848	0.374063	0.745934
C11orf57	910.181	0.0978503	0.206972	0.305276	0.694795
C11orf58	4301.6	0.065655	0.172782	0.53314	0.843407
C11orf63	846.711	0.197443	0.283187	0.0807145	0.413497
C11orf65	117.06	0.0154438	0.180006	0.870757	0.969214
C11orf68	1284.75	0.135592	0.203537	0.229032	0.625699
C11orf70	108.08	-0.0107156	0.194072	0.889267	0.972137
C11orf71	207.496	0.140757	0.210051	0.211692	0.60926
C11orf73	1018.63	0.113457	0.194066	0.296994	0.688995
C11orf74	554.379	0.0506954	0.173537	0.622897	0.88485
C11orf80	2483.86	-0.345504	0.324915	0.0295635	0.251434
C11orf83	789.29	-0.112113	0.221399	0.214673	0.613129
C11orf84	1593.18	-0.0371566	0.161166	0.720835	0.923448
C11orf91	20.9637	-0.152103	0.28991	0.0133505	0.164269
C11orf94	49.4184	-0.0147973	0.191037	0.854192	0.964596
C11orf95	722.616	-0.0720054	0.187075	0.4676	0.808604
C11orf96	773.987	-0.0340966	0.185699	0.704863	0.916812
C12orf10	1305.88	0.173411	0.200364	0.155844	0.538634
C12orf29	1321.07	0.0178342	0.164424	0.865554	0.968186
C12orf4	2450.33	0.146376	0.198589	0.207947	0.604554
C12orf42	55.4231	0.00586405	0.207218	0.889427	0.972137
C12orf43	370.767	0.0819966	0.184682	0.428561	0.783681
C12orf45	485.052	0.162561	0.19905	0.174756	0.568059
C12orf49	1048.78	0.111232	0.176226	0.321231	0.708734
C12orf5	467.856	0.126001	0.223354	0.202397	0.598104
C12orf55	655.59	0.122415	0.219518	0.214484	0.61282
C12orf56	19.9215	-0.0230808	0.210512	0.405961	0.766442
C12orf57	3219.39	0.146394	0.22259	0.188053	0.58352
C12orf60	58.9105	-0.0270904	0.199569	0.690416	0.909913
C12orf61	26.0621	0.019842	0.202192	0.754697	0.93494
C12orf65	331.116	0.0900377	0.214271	0.277354	0.671565
C12orf66	492.467	0.0252733	0.182714	0.787388	0.944424
C12orf73	282.151	-0.0286402	0.19408	0.710157	0.919344
C12orf74	32.5785	0.0606963	0.220047	0.104455	0.461359
C12orf75	607.204	0.200235	0.316412	0.0467318	0.320252
C12orf76	190.583	0.219188	0.268414	0.0854965	0.421521
C12orf79	38.4394	1.55578	0.729294	0.000827847	0.0311536
C14orf1	423.518	-0.103729	0.186614	0.340186	0.720401
C14orf119	1149.93	0.110667	0.192183	0.306922	0.696533
C14orf132	154.487	-0.0378434	0.198748	0.610043	0.878567
C14orf142	277.777	0.0673365	0.177444	0.520033	0.836478
C14orf159	2981.86	0.148117	0.244521	0.136786	0.509677
C14orf166	4795.61	0.201694	0.224117	0.113447	0.475389
C14orf169	1695.9	0.0262376	0.15768	0.807486	0.950691
C14orf182	55.4613	0.0459734	0.210478	0.366784	0.740726
C14orf183	127.578	-0.0292744	0.187293	0.739882	0.929098
C14orf2	1743.61	0.0584548	0.183545	0.55372	0.851529
C14orf28	314.535	0.0261049	0.169864	0.79142	0.944914
C14orf37	282.936	-0.0379369	0.200719	0.579136	0.863347
C14orf39	33.3873	-0.0231987	0.210838	0.293251	0.6869
C14orf64	99.2474	2.32406	0.926451	8.10703e-05	0.00697766
C14orf79	597.274	-0.158948	0.285544	0.031403	0.259079
C14orf80	632.915	-0.354824	0.39442	0.026574	0.239138
C14orf93	501.221	0.013616	0.170172	0.894647	0.97268
C15orf26	33.8277	-0.125518	0.256377	0.0484727	0.324767
C15orf27	57.5536	0.0782478	0.219928	0.213668	0.61221
C15orf37	39.0895	0.0979915	0.224699	0.209282	0.606286
C15orf38	267.568	0.109312	0.189704	0.318252	0.705936
C15orf39	6517.14	0.0290637	0.168582	0.778924	0.942938
C15orf40	357.547	0.0717364	0.18848	0.470238	0.810183
C15orf41	459.149	-0.223584	0.216026	0.087878	0.427273
C15orf48	295.813	-0.0382996	0.209007	0.408266	0.768382
C15orf52	2509.59	-0.0981526	0.220568	0.222495	0.620354
C15orf53	20.6469	0.110953	0.253526	0.00266653	0.066898
C15orf57	454.321	0.218446	0.227934	0.0951896	0.44381
C15orf59	82.4758	0.0705499	0.203044	0.410761	0.771052
C15orf61	510.069	0.010739	0.185313	0.908255	0.976135
C15orf62	35.9257	-0.00223224	0.204096	0.964679	0.990044
C15orf65	115.664	-0.061207	0.200923	0.456539	0.802977
C16orf13	1217.35	-0.0226233	0.177884	0.798415	0.947448
C16orf45	652.659	-0.0855356	0.223404	0.167327	0.555667
C16orf46	266.547	-0.162626	0.239036	0.142005	0.516388
C16orf54	231.203	1.97719	0.673838	4.81122e-05	0.00520423
C16orf58	4089.79	-0.136313	0.197689	0.238694	0.633646
C16orf59	446.463	-0.0937248	0.231976	0.0876635	0.426804
C16orf62	4612.76	-0.0101129	0.156242	0.913272	0.977477
C16orf70	1257.25	0.0727576	0.193527	0.453991	0.800759
C16orf71	45.1542	-0.0327695	0.203202	0.577907	0.862895
C16orf72	3732.37	0.0901596	0.168563	0.428435	0.783681
C16orf74	142.649	-0.0772637	0.223128	0.134832	0.506415
C16orf80	931.423	0.115052	0.202218	0.278584	0.672354
C16orf86	153.497	0.103217	0.205056	0.296949	0.688995
C16orf87	510.886	0.149241	0.244659	0.134463	0.505793
C16orf89	56.8025	0.0651507	0.224315	0.00432545	0.0867615
C16orf91	395.061	-0.0464348	0.187223	0.618891	0.882904
C16orf93	231.369	-0.311012	0.4257	0.0297593	0.251769
C16orf95	110.256	-0.0294373	0.18897	0.731933	0.926628
C16orf96	22.6458	0.0787278	0.218675	0.252555	0.649039
C17orf100	46.8869	-0.0370241	0.20054	0.597602	0.871903
C17orf104	37.1444	0.0190253	0.210648	0.2864	0.679496
C17orf107	308.165	-0.0905755	0.183273	0.394151	0.759387
C17orf51	80.9353	0.00416825	0.197566	0.954024	0.986949
C17orf53	489.459	-0.139791	0.255365	0.087979	0.427383
C17orf58	253.665	-0.0670278	0.198616	0.443366	0.793248
C17orf59	569.04	0.512587	0.420012	0.0114243	0.149452
C17orf62	4299.96	0.0673003	0.160807	0.528779	0.842367
C17orf67	382.545	0.036421	0.179436	0.711141	0.919696
C17orf70	2739.33	-0.107218	0.190998	0.321143	0.708684
C17orf75	650.931	0.0223388	0.180874	0.813086	0.953381
C17orf80	1567.54	0.09405	0.176821	0.387616	0.754236
C17orf82	45.1114	-0.0687335	0.217282	0.232049	0.628448
C17orf85	2405.75	0.0216966	0.158044	0.839517	0.9601
C17orf89	199.431	-0.0315009	0.198934	0.645545	0.893946
C17orf96	156.887	0.00760214	0.200688	0.89845	0.973752
C17orf97	963.412	-0.45043	0.24712	0.00741221	0.119057
C18orf21	881.083	0.313678	0.315507	0.0408658	0.298276
C18orf25	982.709	0.114876	0.181432	0.306536	0.696156
C18orf54	504.708	0.0395343	0.186022	0.669292	0.902085
C18orf8	2739.29	0.205015	0.260863	0.094017	0.44142
C19orf10	2989.54	-0.0568352	0.20085	0.467789	0.808609
C19orf12	1079	0.0228607	0.188673	0.788348	0.944474
C19orf18	98.5554	-0.043612	0.195877	0.590845	0.869916
C19orf24	1029.16	-0.00802317	0.184988	0.91567	0.977486
C19orf25	683.733	0.0125439	0.164003	0.908351	0.976177
C19orf26	334.623	-0.0889516	0.229935	0.0881717	0.427841
C19orf33	582.725	-0.0773461	0.229226	0.00444284	0.0877805
C19orf35	69.3648	0.138351	0.255127	0.0941866	0.441859
C19orf38	280.985	0.907376	0.540082	0.00248987	0.0646112
C19orf40	197.011	-0.0524459	0.205177	0.445519	0.794447
C19orf43	5873.12	0.112953	0.187791	0.307142	0.69676
C19orf44	927.16	-0.232055	0.239056	0.0807119	0.413497
C19orf45	74.7372	-0.0736069	0.226092	0.035975	0.278726
C19orf47	1467.57	-0.148072	0.250803	0.114888	0.478678
C19orf48	1758.5	-0.0607992	0.208204	0.369302	0.742112
C19orf52	376.272	-0.1043	0.198601	0.314432	0.703296
C19orf53	1700.21	0.0251006	0.166957	0.827891	0.957538
C19orf54	585.017	-0.129659	0.223684	0.203066	0.598359
C19orf57	204.608	-0.618912	0.54953	0.0083443	0.125823
C19orf60	1014.66	0.00357805	0.171696	0.975266	0.993824
C19orf66	3737.67	0.179736	0.219081	0.139969	0.514154
C19orf68	698.082	-0.0134811	0.150224	0.894556	0.97268
C19orf70	901.716	-0.073259	0.194876	0.444268	0.793522
C19orf71	902.632	-0.266729	0.427637	0.0220943	0.216534
C19orf73	43.9667	-0.0358565	0.201035	0.601868	0.874485
C19orf82	97.4907	-0.12409	0.212023	0.240056	0.634539
C19orf83	71.8059	-0.0460085	0.200273	0.542145	0.847764
C1D	624.058	0.109224	0.168726	0.328873	0.713563
C1GALT1	2553.29	0.0429651	0.18748	0.637324	0.890979
C1GALT1C1	1633.71	-0.0138601	0.179366	0.882002	0.970582
C1orf101	369.93	-0.256786	0.285865	0.0608985	0.365165
C1orf105	21.4983	-0.0426428	0.215069	0.188982	0.584332
C1orf106	1837.75	-0.932736	0.651341	0.00290982	0.0703305
C1orf109	318.48	-0.00569887	0.168793	0.953479	0.986899
C1orf112	3694.86	-0.282497	0.340414	0.0470869	0.320745
C1orf115	237.883	0.0350376	0.204294	0.555182	0.852022
C1orf116	1624.55	-0.0510347	0.216718	0.0580132	0.354891
C1orf122	305.549	0.0092168	0.193379	0.909671	0.976494
C1orf123	561.048	0.135578	0.211922	0.216877	0.614592
C1orf127	160.043	-0.0288678	0.177184	0.767877	0.938862
C1orf131	966.093	-0.0417272	0.182135	0.663567	0.900448
C1orf145	103.753	-0.0372999	0.201778	0.576996	0.862505
C1orf159	672.668	-0.20162	0.26582	0.0924147	0.438277
C1orf162	1303.32	1.52812	0.7746	0.000535032	0.0229115
C1orf167	54.3008	-0.095898	0.232862	0.104248	0.460949
C1orf168	107.562	-0.0419447	0.215681	0.0433731	0.307116
C1orf174	726.86	0.04888	0.181256	0.613099	0.880065
C1orf177	29.0952	0.00637656	0.203709	0.90485	0.974824
C1orf186	72.0284	-0.00131842	0.209641	0.90539	0.974918
C1orf189	48.0232	0.00329763	0.196426	0.97776	0.994171
C1orf198	6833.25	-0.148948	0.246665	0.125619	0.496219
C1orf204	85.5814	-0.0667516	0.21215	0.317627	0.705451
C1orf21	2711.47	-0.154699	0.218538	0.175261	0.569018
C1orf210	122.089	-0.0392204	0.214386	0.0659837	0.380323
C1orf213	75.0268	-0.00731476	0.18933	0.924241	0.980126
C1orf216	348.982	0.0311012	0.168835	0.768653	0.93926
C1orf220	159.355	-0.0290267	0.206736	0.522966	0.838749
C1orf226	344.398	-0.254706	0.543475	0.000570841	0.0236865
C1orf228	531.353	0.212513	0.277832	0.082724	0.416881
C1orf233	181.27	-0.0684052	0.21427	0.276288	0.670606
C1orf27	2496.86	-0.289859	0.309821	0.0453382	0.313918
C1orf35	1145.33	-0.134122	0.237455	0.137643	0.510731
C1orf43	5654	-0.083644	0.207248	0.335229	0.718105
C1orf50	320.505	0.0721048	0.184311	0.481125	0.816518
C1orf52	940.039	0.138752	0.177106	0.231271	0.62748
C1orf53	114.411	-0.222186	0.3634	0.0274973	0.243255
C1orf54	618.884	0.373357	0.403417	0.0249376	0.229886
C1orf56	537.996	-0.0844025	0.218663	0.228418	0.624709
C1orf61	17.8619	-0.0175915	0.207035	0.668073	0.902085
C1orf64	90.0836	-0.0454082	0.216764	0.0229061	0.219661
C1orf74	274.023	-0.149158	0.237281	0.152656	0.534126
C1orf85	2288.81	0.0337945	0.192045	0.682409	0.907003
C1orf86	1627.58	-0.0542549	0.168468	0.601374	0.874132
C1orf94	35.0772	-0.00315737	0.207676	0.935294	0.982309
C1orf95	406.877	-0.0461942	0.215639	0.0766366	0.405561
C1QA	13181.6	0.186296	0.344366	0.00170224	0.0507171
C1QB	19721.2	0.16063	0.303031	0.0031532	0.0730953
C1QBP	2455.96	0.112709	0.19904	0.295941	0.688639
C1QC	25097.6	0.195235	0.351787	0.00513796	0.0955338
C1QL1	97.5653	-0.0814089	0.228327	0.0655653	0.378836
C1QL2	326.232	0.0799681	0.225812	0.133574	0.504768
C1QL4	17.8619	-0.0437719	0.216654	0.064364	0.37499
C1QTNF1	759.861	-0.136192	0.199906	0.22832	0.624668
C1QTNF2	92.2502	-0.00216256	0.196405	0.975054	0.993824
C1QTNF3	102.794	-0.0446189	0.20039	0.547498	0.849338
C1QTNF4	26.3703	0.0547386	0.206844	0.441205	0.791947
C1QTNF6	1144.05	-0.099697	0.227468	0.163968	0.551083
C1QTNF7	101.259	0.052883	0.214473	0.230084	0.626599
C1QTNF8	20.0286	-0.00125448	0.210923	0.92562	0.980414
C1QTNF9	19.1719	0.00869515	0.205367	0.855646	0.96488
C1QTNF9B-AS1	65.2279	-0.0698249	0.214686	0.280426	0.674434
C1R	14172.8	0.0522217	0.201908	0.494729	0.823491
C1RL	3759.72	-0.00219986	0.165775	0.974698	0.993824
C1RL-AS1	224.122	0.0385421	0.188804	0.666931	0.902085
C1S	19677	0.118803	0.231736	0.166844	0.554954
C2	7116.77	0.062657	0.217484	0.1724	0.564711
C20orf194	2828.32	0.0478109	0.193769	0.576574	0.862505
C20orf195	59.4695	-0.0611362	0.217687	0.176908	0.570742
C20orf196	100.455	0.14877	0.247533	0.133122	0.504471
C20orf197	39.521	-0.00351804	0.200567	0.951081	0.985721
C20orf203	21.4391	0.0283958	0.208237	0.517032	0.836047
C20orf24	71.016	-0.0357444	0.200574	0.605356	0.876102
C20orf26	68.7071	-0.247625	0.494928	0.00250972	0.064835
C20orf27	1071.64	0.0259868	0.17018	0.794243	0.946112
C20orf96	779.175	-0.18481	0.250483	0.112652	0.47377
C21orf119	49.9176	0.0562188	0.200302	0.493826	0.822542
C21orf128	23.062	-0.0158975	0.209657	0.623631	0.885129
C21orf2	808.849	-0.0616424	0.164466	0.559897	0.853644
C21orf33	5985.37	0.0124376	0.149382	0.908666	0.976208
C21orf49	92.9386	0.0803539	0.209341	0.333942	0.716868
C21orf58	724.968	-0.23284	0.355713	0.0354802	0.27585
C21orf59	2630.82	-0.124776	0.185537	0.265679	0.661262
C21orf67	95.959	-0.0121363	0.199422	0.841685	0.960269
C21orf88	26.0928	-0.0147871	0.208924	0.635839	0.889826
C21orf90	27.4905	-0.0223987	0.207906	0.573799	0.861495
C21orf91	1384.66	0.278906	0.399461	0.0319144	0.260751
C22orf23	16.5675	-0.0336594	0.206766	0.534706	0.843943
C22orf34	677.351	0.325164	0.489993	0.0226979	0.219072
C22orf39	291.878	0.0633499	0.19177	0.499816	0.825874
C22orf46	313.438	-0.048604	0.16999	0.637337	0.890979
C2CD2	1972.31	-0.0457415	0.1766	0.64426	0.893738
C2CD2L	1781.5	-0.0256968	0.149958	0.807463	0.950691
C2CD3	5999.66	-0.0434123	0.15703	0.688732	0.909071
C2CD4B	33.7322	-0.030333	0.205147	0.58344	0.866315
C2CD4C	53.6415	-0.0612568	0.219713	0.0983828	0.449654
C2CD4D	102.733	-0.158342	0.278046	0.0547741	0.344538
C2CD5	6615.4	0.0127088	0.160311	0.920502	0.978761
C2orf15	124.94	-0.0324722	0.197978	0.638864	0.891409
C2orf27A	933.974	-0.382583	0.471656	0.0208517	0.210161
C2orf40	37.7155	0.0204313	0.208986	0.519564	0.836197
C2orf42	845.013	0.115988	0.175179	0.305682	0.69499
C2orf43	745.994	0.278753	0.269536	0.0520599	0.33622
C2orf44	439.884	0.185027	0.247599	0.120619	0.486674
C2orf47	793.227	0.0926046	0.187262	0.3806	0.750324
C2orf48	127.346	-0.0769101	0.221096	0.176162	0.570028
C2orf49	1071.78	0.0483969	0.157556	0.652114	0.89624
C2orf50	42.93	-0.0729868	0.224561	0.0789454	0.410549
C2orf54	162.026	-0.0914045	0.238786	0.00103079	0.0357712
C2orf61	57.3977	0.0676108	0.212752	0.316977	0.705411
C2orf68	960.658	-0.00497489	0.159875	0.956388	0.987329
C2orf69	1130.85	-0.00403602	0.176871	0.963388	0.98957
C2orf70	58.56	-0.0584303	0.218699	0.103145	0.459097
C2orf72	95.8701	-0.0198618	0.210099	0.421325	0.779137
C2orf74	309.993	0.101757	0.210143	0.286096	0.679166
C2orf76	352.2	0.154284	0.188908	0.193521	0.589693
C2orf81	302.34	-0.00662285	0.189375	0.932929	0.982013
C2orf82	45.6634	-0.107479	0.235545	0.129734	0.501338
C2orf88	54.945	0.0524073	0.215152	0.210545	0.607861
C3	61562.6	0.0952993	0.226959	0.160801	0.54722
C3AR1	1765.64	0.101014	0.233978	0.103247	0.459329
C3orf14	931.23	-0.0162463	0.201834	0.765259	0.938224
C3orf17	3130.08	0.0523226	0.152952	0.628973	0.886145
C3orf18	337.037	0.173831	0.274528	0.0825125	0.416837
C3orf20	54.9659	0.0491997	0.207483	0.442525	0.792679
C3orf22	16.4853	-0.0181931	0.210709	0.306816	0.696475
C3orf33	178.777	-0.0168279	0.197463	0.798005	0.947448
C3orf35	147.505	-0.0874927	0.205879	0.336006	0.718307
C3orf36	16.7109	-0.0939772	0.231137	0.132209	0.503648
C3orf38	2194.97	0.214145	0.263545	0.0910554	0.43604
C3orf52	543.477	-2.73578	0.877007	4.22782e-06	0.000854708
C3orf55	44.7973	0.0190868	0.209609	0.451811	0.799022
C3orf58	1297.9	0.0724399	0.205947	0.373417	0.745462
C3orf62	401.1	0.0434451	0.173493	0.673415	0.903679
C3orf67	477.185	-0.0208044	0.206353	0.614758	0.880728
C3orf70	123.954	-0.149383	0.254557	0.109793	0.468319
C3orf80	65.1196	-0.077737	0.224129	0.127438	0.499103
C4A	4757.63	-0.213423	0.307149	0.0593494	0.359722
C4B	5384.42	-0.222111	0.325334	0.0490327	0.326497
C4BPA	57.1602	0.000401282	0.209682	0.971556	0.99274
C4orf19	230.892	-0.0622448	0.222452	0.0128648	0.160643
C4orf27	1031.82	0.197952	0.25619	0.102917	0.458329
C4orf29	1660.01	0.0470793	0.165767	0.652369	0.896396
C4orf3	1181.28	0.0201804	0.168844	0.841651	0.960269
C4orf32	229.489	0.0732485	0.186996	0.463556	0.805859
C4orf33	340.362	0.153252	0.226502	0.170454	0.561698
C4orf36	62.2469	-0.154265	0.251492	0.124378	0.49348
C4orf46	306.729	-0.0119445	0.190669	0.879096	0.969954
C4orf47	93.4245	-0.0422507	0.20361	0.51927	0.836197
C4orf48	97.5569	0.0138785	0.191892	0.864735	0.96808
C4orf50	106.374	0.0359707	0.209012	0.405475	0.76626
C5	1557.83	0.0103067	0.177452	0.92046	0.978761
C5AR1	2229.16	0.0846445	0.209539	0.314503	0.703364
C5AR2	381.882	-0.0695841	0.20557	0.39747	0.761183
C5orf15	2982.51	0.0512411	0.153037	0.639098	0.891409
C5orf20	139.949	2.39865	1.37144	0.000277517	0.0154151
C5orf22	2574.84	0.0811836	0.163972	0.458173	0.803318
C5orf24	1483.77	0.00973384	0.155216	0.928642	0.981078
C5orf28	719.253	-0.0963134	0.175947	0.378852	0.749294
C5orf30	635.401	-0.123248	0.241298	0.115695	0.479492
C5orf34	444.601	-0.0978234	0.208691	0.295329	0.688099
C5orf38	130.769	-0.073228	0.224378	0.0850023	0.42116
C5orf42	12822.8	-0.150475	0.185274	0.200223	0.59589
C5orf45	1182.31	-0.0380636	0.187796	0.658895	0.898838
C5orf46	288.43	-0.10657	0.247811	0.00484924	0.0925202
C5orf49	39.2877	-0.0358409	0.211549	0.342846	0.721811
C5orf51	1110.24	0.105621	0.17954	0.34041	0.720401
C5orf55	114.134	0.00926147	0.183258	0.919655	0.978646
C5orf56	451.543	0.848702	0.268271	9.41242e-05	0.00757612
C5orf60	44.3901	-0.0775582	0.228523	0.0343027	0.270839
C5orf63	222.542	-0.00439607	0.199725	0.937421	0.982873
C5orf66	64.0311	-0.05376	0.215846	0.169457	0.559579
C6	123.396	0.0276444	0.209276	0.472009	0.811394
C6orf1	750.89	-0.0870829	0.19171	0.390523	0.757265
C6orf106	4084.21	0.0605687	0.172376	0.547584	0.849338
C6orf120	1627.91	0.152371	0.21316	0.192396	0.589012
C6orf132	4098.25	-0.141481	0.273611	0.0196506	0.203959
C6orf136	988.459	-0.0904425	0.180958	0.396732	0.760902
C6orf141	837.105	-0.0560648	0.207974	0.385031	0.752998
C6orf163	390.031	0.0505745	0.203632	0.475681	0.813914
C6orf164	28.1455	-0.00159555	0.199373	0.977618	0.994171
C6orf165	139.323	-0.279381	0.356962	0.0439109	0.308708
C6orf195	84.1493	-0.0489366	0.21139	0.320147	0.707761
C6orf203	728.506	0.0496254	0.171905	0.628384	0.886093
C6orf211	2580.89	0.0602609	0.195696	0.492773	0.822202
C6orf226	90.3637	0.121194	0.211558	0.248478	0.644741
C6orf25	23.0415	0.0093689	0.204265	0.855399	0.964865
C6orf47	883.153	-0.026806	0.167079	0.7936	0.945619
C6orf48	3953.96	0.0632246	0.184448	0.526074	0.840701
C6orf52	81.234	-0.0941107	0.23262	0.0864358	0.423794
C6orf57	316.018	-0.0044443	0.194415	0.948945	0.985221
C6orf62	11888	0.0607323	0.187684	0.527528	0.841593
C6orf89	3153.43	0.0342123	0.154538	0.750246	0.933165
C6orf99	25.2299	-0.0641515	0.219943	0.136716	0.509677
C7	10881.2	0.0104719	0.209906	0.558236	0.853151
C7orf13	157.897	-0.132296	0.242408	0.1338	0.504929
C7orf25	1094.3	-0.160418	0.188291	0.179128	0.573752
C7orf26	1806.42	0.0734837	0.169687	0.494077	0.822721
C7orf31	444.043	0.551916	0.537784	0.0105575	0.143066
C7orf43	1151.42	-0.0464914	0.155751	0.663572	0.900448
C7orf49	1162.57	-0.0606944	0.175162	0.55469	0.851767
C7orf50	1401.38	-0.0234985	0.176224	0.801482	0.948769
C7orf55	46.3482	0.0110384	0.192121	0.891871	0.972276
C7orf60	848.844	0.124813	0.217472	0.221074	0.61922
C7orf61	111.874	0.0548144	0.197053	0.519368	0.836197
C7orf63	410.861	-0.0514945	0.198628	0.51652	0.83602
C7orf73	954.614	-0.013582	0.160803	0.894783	0.97268
C8A	23.9853	0.00267454	0.21069	0.823035	0.956026
C8B	31.6129	-0.00435653	0.21049	0.561484	0.854166
C8G	219.554	-0.198867	0.340901	0.0191153	0.201573
C8orf31	163.629	0.0927479	0.211441	0.296833	0.688995
C8orf33	886.991	0.0113184	0.193702	0.883788	0.971033
C8orf37	226.747	0.0656373	0.196344	0.467225	0.808437
C8orf4	1491.48	-0.0866976	0.230753	0.0498148	0.328808
C8orf44	150.618	0.00378355	0.179267	0.969402	0.992104
C8orf44-SGK3	18.6887	0.0315717	0.207201	0.53693	0.84549
C8orf46	56.6143	-0.0799858	0.216476	0.271391	0.66663
C8orf48	34.1676	-0.00630578	0.198209	0.923159	0.979796
C8orf58	482.922	-0.0288431	0.183943	0.753993	0.93471
C8orf59	1796.82	0.124085	0.217988	0.22287	0.620354
C8orf76	256.855	0.0115965	0.1904	0.887286	0.972079
C8orf82	745.572	-0.0540927	0.200541	0.483822	0.817201
C8orf88	180.813	0.0306141	0.199642	0.65726	0.898354
C9	60.1849	-0.0208185	0.209674	0.43814	0.789869
C9orf106	251.753	-0.0220511	0.206188	0.613889	0.880347
C9orf114	1375.31	-0.11047	0.171238	0.323426	0.710225
C9orf116	95.2274	-0.31823	0.502532	0.0228887	0.219661
C9orf117	59.465	-0.105395	0.246101	0.0134165	0.164615
C9orf129	434.407	0.0405494	0.177976	0.677524	0.904874
C9orf139	104.822	0.134649	0.249186	0.111768	0.472337
C9orf142	1352.64	-0.192086	0.221382	0.128023	0.499521
C9orf152	247.502	-0.0259133	0.211686	0.0987224	0.450133
C9orf153	29.8848	-0.0688565	0.214751	0.283371	0.677023
C9orf156	826.572	0.111898	0.191739	0.307748	0.697263
C9orf16	1028.39	0.141198	0.196509	0.22368	0.62133
C9orf163	22.6295	-0.0943036	0.238022	0.0285847	0.248363
C9orf172	1202.38	-0.0701145	0.210495	0.32456	0.710411
C9orf24	24.2242	-0.025589	0.204822	0.635562	0.889826
C9orf3	2586.22	-0.130474	0.213225	0.22408	0.621645
C9orf37	542.271	-0.0699389	0.198796	0.432137	0.786448
C9orf40	197.958	-0.0417428	0.1859	0.649598	0.895721
C9orf41	2074.17	0.0470724	0.179267	0.63983	0.891567
C9orf43	87.5301	-0.171779	0.274918	0.0829664	0.417377
C9orf47	35.7101	-0.0469937	0.213632	0.236631	0.632114
C9orf50	19.4781	-0.0122678	0.208282	0.690809	0.910225
C9orf64	826.094	-0.055346	0.155061	0.603267	0.874931
C9orf66	44.7967	0.104239	0.220118	0.243934	0.639289
C9orf69	917.832	-0.222557	0.207963	0.0869444	0.424969
C9orf72	1191.33	0.292986	0.31328	0.042672	0.30493
C9orf78	1407.88	0.218586	0.251543	0.0894316	0.430993
C9orf84	18.8873	-0.0177521	0.211239	0.214135	0.612336
C9orf85	490.55	0.104443	0.174335	0.351492	0.728112
C9orf89	1347.77	0.00546059	0.175931	0.95504	0.986992
C9orf9	286.111	-0.0197204	0.188819	0.811647	0.952807
C9orf91	1089.78	0.0668459	0.188978	0.490881	0.821206
CA1	21.1817	0.0270747	0.213019	0.0359981	0.278781
CA11	339.527	0.0140166	0.198245	0.83732	0.959317
CA12	3423.26	-0.125762	0.26281	0.0053158	0.0971825
CA13	292.295	-0.0960455	0.218442	0.242073	0.636522
CA2	1052.57	-0.181385	0.291978	0.0578589	0.354577
CA3	137.432	-2.1444	1.003	0.000156572	0.0106326
CA5B	689.643	0.123708	0.217507	0.22737	0.624194
CA5BP1	417.397	0.0493951	0.161428	0.642146	0.892682
CA8	491.318	0.0358227	0.206828	0.486724	0.818801
CA9	94.8732	-0.0526914	0.217508	0.0978614	0.448095
CAAP1	882.635	-0.0308197	0.159197	0.765999	0.938286
CAB39	4534.15	0.268617	0.303899	0.054757	0.344538
CAB39L	637.938	-0.00161466	0.174214	0.989334	0.99696
CABIN1	13273.3	-0.0994218	0.168477	0.369574	0.742479
CABLES1	2359.57	-0.0629683	0.172513	0.546399	0.849026
CABLES2	840.269	-0.12134	0.211365	0.240691	0.635378
CABP1	27.4266	0.0306367	0.206706	0.552086	0.851372
CABP4	153.905	-0.04429	0.199669	0.542541	0.847876
CABYR	912.301	-1.03565	0.389377	0.00028105	0.0155391
CACFD1	477.779	-0.480768	0.706321	0.0117468	0.152411
CACHD1	1369.41	0.023646	0.201148	0.704895	0.916812
CACNA1A	214.97	0.0471048	0.201151	0.523491	0.839149
CACNA1B	258.603	-0.0401301	0.212991	0.185678	0.581797
CACNA1C	5599.12	-0.0417732	0.199633	0.562474	0.854524
CACNA1C-AS1	26.1474	0.0217628	0.206877	0.626364	0.885382
CACNA1D	4435.84	-0.0437112	0.212863	0.235703	0.631715
CACNA1E	155.833	0.0565858	0.214182	0.25203	0.648785
CACNA1F	198.97	0.0202001	0.20204	0.729538	0.925245
CACNA1G	261.413	0.0966576	0.235777	0.0586584	0.35746
CACNA1H	7614.18	-0.0468239	0.213262	0.22287	0.620354
CACNA1I	471.838	0.00516778	0.207827	0.872956	0.969214
CACNA1S	159.694	-0.112869	0.253888	0.00366101	0.0790687
CACNA2D1	2007.67	-0.0905857	0.219554	0.224838	0.622353
CACNA2D2	659.323	-0.0340759	0.211704	0.256155	0.652726
CACNA2D3	213.191	-0.0202978	0.20793	0.557168	0.852511
CACNA2D4	168.601	-0.0500755	0.186588	0.591258	0.869975
CACNB1	952.23	-0.126756	0.223844	0.201031	0.597101
CACNB2	222.427	-0.175014	0.301013	0.0343784	0.271067
CACNB3	2315.37	-0.534161	0.630367	0.0103464	0.142109
CACNB4	209.458	-0.0355009	0.203207	0.562063	0.854304
CACNG1	36.6605	-0.0419423	0.212901	0.289994	0.682561
CACNG4	1130.63	-0.050463	0.215204	0.157544	0.541424
CACNG5	18.742	0.000406744	0.209889	0.965915	0.990645
CACNG6	16.7683	-0.0764005	0.228988	0.0226496	0.219013
CACNG8	17.0905	-0.00551504	0.20436	0.908823	0.976208
CACTIN	2730.77	-0.0864539	0.166086	0.431682	0.785887
CACTIN-AS1	106.628	-0.12641	0.251473	0.0735781	0.398749
CACUL1	3236.17	0.0297298	0.153443	0.777154	0.942231
CACYBP	3134.67	-0.0138624	0.178089	0.882415	0.970695
[truncated: 15,388 more rows]

## Sheet: B_vs_week8_hallmark
Supplementary Table 6. The results of gene set enrichment analysis using Hallmark gene sets and the results of paired DE analysis between baseline and week 8 performed by fgsea.
pathway	pval	padj	log2err	ES	NES	size	leadingEdge
HALLMARK_ADIPOGENESIS	0.84375	0.907258	0.115734	-0.253608	-0.848611	185	COL4A1|DHCR7|CD151|COL15A1|ELOVL6|PHLDB1|ABCB8|RETSAT|TST|ADIPOR2|GBE1|POR|ADCY6|SOWAHC|REEP6|SLC5A6|GPD2|YWHAG|PPP1R15B|SLC19A1|FZD4|SORBS1|ATP1B3|RAB34|SLC25A10|SDHC|MTCH2|RMDN3|RTN3|NDUFA5|SLC25A1|LAMA4
HALLMARK_ALLOGRAFT_REJECTION	3.34861e-25	1.6743e-23	1.30309	0.850803	2.33999	187	IFNG|CXCL13|CXCL9|SIT1|CD3D|CD8A|TRAT1|GZMB|LCK|CD3G|ITK|CD8B|FASLG|CD3E|CD2|CRTAM|CD96|ZAP70|CD40LG|CXCR3|PRKCB|IL2RG|CCR5|CD7|IL18RAP|CD247|PTPRC|LTB|IL2RB|ITGAL|MAP4K1|HLA-DOA|LY75|HLA-DQA1|STAT4|KLRD1|IL12RB1|CD28|HLA-DMB|HLA-DRA|IL16|GPR65|SRGN|CD74|HLA-DOB|WAS|HLA-DMA|CD40|IRF8|LCP2|CD86|FGR|HCLS1|B2M|STAT1|HLA-E|IL7|JAK2|IL2RA|PSMB10|ST8SIA4|PTPN6|RPS3A|RPL9|HLA-A|LYN|CCND3|CCND2|CD80|CSK|…
HALLMARK_ANDROGEN_RESPONSE	0.416999	0.631816	0.0675189	0.405259	1.0361	94	TNFAIP8|B2M|MAF|PTK2B|RPS6KA3|PIAS1|CCND3|ABCC4|FKBP5|SLC26A2|UBE2J1|NGLY1|IQGAP2|ELK4|DBI
HALLMARK_ANGIOGENESIS	0.0668679	0.19667	0.287805	-0.569524	-1.49063	35	PDGFA|APP|TNFRSF21|TIMP1|JAG2|JAG1|VAV2|ITGAV|STC1|VEGFA
HALLMARK_APICAL_JUNCTION	0.0765954	0.200832	0.287805	-0.370008	-1.23981	183	NRAP|LAMB3|TNFRSF11B|COL17A1|ITGA2|SPEG|CDH1|CTNND1|JUP|ITGA3|PCDH1|TJP1|MPZL1|ITGB4|HRAS|WASL|THBS3|PKD1|ITGA10|CTNNA1|ACTN1|VCL|ADAM9|LAMC2|ACTN4|CLDN9|TUBG1
HALLMARK_APICAL_SURFACE	0.313636	0.522727	0.0894367	0.504468	1.148	41	IL2RG|IL2RB|MDGA1|CX3CL1|LYN
HALLMARK_APOPTOSIS	0.252747	0.454043	0.0894367	0.424984	1.14806	157	FASLG|CD2|CD69|BIRC3|IRF1|CYLD|TXNIP|CCND2|GCH1|CASP8|ISG20|HMOX1|GPX3|NEFH|CASP4|CFLAR|DPYD|FAS|CASP1|GPX4|PLCB2|FEZ1|ROCK1|GSTM1|DIABLO|BCL10|TNF|IL18|PRF1|BID|CASP3|CASP7|GPX1|PPT1|IFNGR1|CD38|SOD1|SQSTM1|TAP1|HMGB2|GADD45B|BNIP3L
HALLMARK_BILE_ACID_METABOLISM	0.248698	0.454043	0.0940503	0.444698	1.15995	103	LCK|ABCD2|HSD17B11|ACSL5|CAT|PIPOX|CH25H|ALDH1A1|BMP6|SCP2|ACSL1|MLYCD|SOD1|HACL1|SULT1B1|CYP27A1|GSTK1|CYP39A1
HALLMARK_CHOLESTEROL_HOMEOSTASIS	0.00384419	0.0174736	0.431708	-0.58809	-1.76974	72	LDLR|DHCR7|SQLE|EBP|CYP51A1|FDPS|MVK|ERRFI1|HMGCS1|LSS|JAG1|CD9|SREBF2|PCYT2|HMGCR|NSDHL|TNFRSF12A|HSD17B7|SEMA3B|TM7SF2|ALCAM|PMVK|CPEB2|TMEM97
HALLMARK_COAGULATION	0.0803326	0.200832	0.287805	-0.38432	-1.24745	129	MMP1|CTSV|ITGA2|PLAT|PRSS23|THBS1|MMP3|TIMP3|PDGFB|TIMP1|PROC|S100A13|MMP15|CRIP2|CD9
HALLMARK_COMPLEMENT	8.88657e-05	0.000511504	0.538434	0.609561	1.68017	192	GZMK|GZMB|LCK|GP1BA|CD40LG|SPOCK2|FCN1|APOBEC3G|PHEX|PLEK|PSMB9|WAS|FYN|CTSH|LCP2|PIK3CG|IRF1|DPP4|JAK2|TNFAIP3|APOBEC3F|DOCK10|PIM1|F8|LYN|RHOG|IRF2|GRB2|USP15|KIF2A|ERAP2|GNG2|LTA4H|GNAI2|CASP4|VCPIP1|PIK3R5|DYRK2|PFN1|ATOX1|CASP1|C1QC|CTSO|LAP3|GCA|C1QA|CD36|ANG|CTSS|AKAP10|SH2B3|USP8|XPNPEP1|CTSC|SERPING1
HALLMARK_DNA_REPAIR	0.978723	0.978723	0.0962406	-0.211353	-0.702467	147	SNAPC4|CCNO|ARL6IP1|AK1|DGCR8|ADCY6|ITPA|UMPS|GTF3C5|POLH|PNP|SEC61A1|LIG1|BCAM|POLD1|CANT1|ERCC2|POLR2H|ZWINT|CETN2|NUDT9|RAD52|SRSF6
HALLMARK_E2F_TARGETS	0.235669	0.454043	0.234393	-0.336344	-1.12531	194	WDR90|E2F8|GINS1|MELK|CIT|CDKN1A|PSMC3IP|ILF3|MCM7|DONSON|DIAPH3|UNG|LIG1|POLE|TUBG1|POLD1|CTPS1|TBRG4|NUP205|KIF2C|KIF22|KIF18B|CHEK2|SPAG5|RACGAP1|HMGB3|MXD3|ASF1B|TRIP13|ESPL1|WEE1|RAD21|TCF19|BUB1B|BRCA1|NOP56|CKS1B|CCP110|SMC4|AURKA|TIMELESS|POLD2|NUP107|TOP2A|TK1|CDK1|KIF4A|RNASEH2A|SPC25|DEPDC1|CHEK1|PLK1|DLGAP5|STMN1|CDC25A|PLK4|ATAD2|SNRPB|CDC20|MCM2|MCM4|CDCA8|SUV39H1|CCNB2|CDCA3|NME1|G…
HALLMARK_EPITHELIAL_MESENCHYMAL_TRANSITION	4.2614e-06	3.55117e-05	0.610527	-0.543651	-1.81738	195	MMP1|COL4A1|TNFRSF11B|COL4A2|PMEPA1|TPM1|ITGA2|RGS4|IGFBP2|ECM1|THBS1|OXTR|INHBA|BDNF|MMP3|TNC|NID2|TPM2|COL5A3|TIMP3|TIMP1|QSOX1|COL7A1|GPC1|SDC4|LOXL2|TAGLN|SLC6A8|MCM7|PLOD3|CAP2|NTM|TNFRSF12A|LAMC2|BGN|TFPI2|CDH2|PVR|CALU|SERPINH1|SNTB1|COMP|ITGA5|SERPINE1|ITGAV|SPOCK1|ITGB5|THY1|VEGFA|MATN3|PLOD2|FSTL3|BMP1|RHOB|COPA
HALLMARK_ESTROGEN_RESPONSE_EARLY	0.0023098	0.011549	0.431708	-0.447159	-1.49548	192	PDZK1|KCNK15|SYT12|STC2|DHRS2|SLC39A6|RHOD|DHCR7|PRSS23|PODXL|SEC14L2|MAST4|FHL2|PDLIM3|FLNB|KAZN|SLC19A2|FRK|RBBP8|BHLHE40|CELSR2|ZNF185|SLC7A2|TMEM164|XBP1|SLC24A3|KDM4B|FARP1|RRP12|SEMA3B|NAV2|CANT1|ISG20L2|TFAP2C|CELSR1|SLC37A1|RAPGEFL1|P2RY2|IL17RB
HALLMARK_ESTROGEN_RESPONSE_LATE	0.0127749	0.0456246	0.38073	-0.417116	-1.39995	190	PDZK1|GAL|ST6GALNAC2|DHRS2|DHCR7|CDH1|PRSS23|PDLIM3|UNC13B|TST|FLNB|HSPA4L|PLXNB1|CD9|FRK|LSR|RBBP8|ST14|CELSR2|STIL|CA2|XBP1|LAMC2|GALE|SLC24A3|UGDH|FARP1|CHST8|EMP2|TFPI2|SEMA3B|LLGL2|IGSF1|TFAP2C|KIF20A|CKB
HALLMARK_FATTY_ACID_METABOLISM	0.933416	0.952465	0.0259034	0.258843	0.695838	144	HSD17B11|ACSL5|PSME1|UBE2L6|SDHD|HMGCL|ERP29|HADHB|CD36|CPT2|IL4I1|ALDH1A1|ACADM|ACAA2|BLVRA|ACSM3|DECR1|MDH1|G0S2|ACSL1|MLYCD|NBN|MGLL|SUCLG2|ODC1|SUCLG1|CD1D|ACADS|CRYZ|ADH1C|MAOA|ELOVL5|HSD17B4|ACSL4|GABARAPL1|UROD|ME1|ECI2|PDHB|RAP1GDS1|SMS|ADSL|ALDH9A1|HCCS|SERINC1|HIBCH
HALLMARK_G2M_CHECKPOINT	0.363057	0.585576	0.186433	-0.30308	-1.01626	189	SQLE|RAD54L|SLC7A1|ODF2|FANCC|ILF3|TNPO2|STIL|CCNF|POLE|CHAF1A|TPX2|SLC12A2|LIG3|TRAIP|KIF2C|CENPF|KIF22|KIF23|TTK|RACGAP1|INCENP|HMGB3|UBE2C|CDC45|RASAL2|EXO1|WRN|ESPL1|TROAP|CENPA|RAD21|POLQ|UCK2|CKS1B|SMC4|AURKA|NEK2|NUMA1|TOP2A|EFNA5|E2F1|CDK1|HNRNPU|KIF4A|PBK|PRC1|CDC6|CHEK1|PLK1|KIF15|STMN1|CDC25A|PLK4|CDC20|MCM2|SUV39H1|CCNB2|EZH2|SMC1A|MKI67|MAD2L1|MEIS1|MYC|PRMT5|KPNA2|EGF|DMD|KIF11|KIF2…
HALLMARK_GLYCOLYSIS	0.25974	0.454043	0.224966	-0.329379	-1.09923	193	STC2|AGRN|PC|SDC2|PAXIP1|HSPA5|QSOX1|CTH|IER3|SLC25A13|ALDH7A1|GPC1|SRD5A3|HS6ST2|PMM2|COPB2|NSDHL|SPAG4|GALE|CLDN9|GYS1|PKP2|GFPT1|CHST1|ABCB6|HOMER1|GMPPB|NDST3|CHST6|KIF20A|GLCE|KDELR3|EXT1|CHPF|GUSB|STC1|PPP2CB|TPBG|VEGFA|SOX9|PLOD2|SLC37A4|CENPA|SLC25A10|SDHC|GOT1|CASP6|NOL3|FAM162A|B4GALT4|AURKA|ADORA2B|ALG1|AGL|EFNA3|IDUA|CDK1|ARTN|VLDLR|DEPDC1|HK2|B4GALT1|PPFIA4|NDUFV3|BPNT1|FKBP4|CHPF2|S…
HALLMARK_HEDGEHOG_SIGNALING	0.0782123	0.200832	0.271289	-0.558636	-1.45496	34	CNTFR|TLE1|L1CAM|PTCH1|CELSR1|THY1|VEGFA|OPHN1|HEY1|HEY2|NKX6-1|VLDLR|SLIT1|NRCAM|NRP1|MYH9|NF1|SCG2|ETS2
HALLMARK_HEME_METABOLISM	0.626794	0.803582	0.0435378	0.334262	0.914545	180	CLIC2|KEL|KAT2B|UCP2|CCDC28A|CCND3|MPP1|USP15|CAT|LMO2|NR3C1|RBM38|LPIN2|KDM7A|SDCBP|CIR1|EPB41|GYPC|RIOK3|TCEA1|ARL2BP|MFHAS1|FECH|YPEL5|BMP2K|BLVRA|SEC14L1|TSPAN5|XPO7|NCOA4|KHNYN|ACKR1|BNIP3L|TMCC2|FBXO7|GDE1|ADD2|BACH1|C3|UROD|HEBP1|FOXO3|SIDT2|PICALM|TNRC6B|MXI1|RNF19A|SLC25A38
HALLMARK_HYPOXIA	0.781473	0.885984	0.0329431	0.30046	0.824694	185	BTG1|RORA|CHST2|TNFAIP3|PDK3|PIM1|PNRC1|CCNG2|IDS|SLC2A3|AMPD3|RBPJ|ISG20|HMOX1|NR3C1|GLRX|ETS1|ZNF292|PLAC8|NAGK|RRAGD|CXCR4|ATP7A|PDK1|SDC3|XPNPEP1
HALLMARK_IL2_STAT5_SIGNALING	4.98148e-08	6.22685e-07	0.719513	0.70973	1.95131	190	CTLA4|ICOS|CST7|EOMES|CD48|CCR4|FGL2|RHOH|LTB|IL2RB|SELL|TNFRSF9|IL10RA|GBP4|TNFRSF1B|GPR65|FLT3LG|CD79B|ABCB1|IRF8|CD86|TRAF1|PRKCH|PTGER2|IL2RA|DHRS3|RORA|CDC42SE2|GALM|PIM1|BATF|CCND3|SCN9A|CCND2|SLC2A3|GLIPR2|NCOA3|IL18R1
HALLMARK_IL6_JAK_STAT3_SIGNALING	9.20707e-05	0.000511504	0.538434	0.724105	1.81901	84	CXCL13|CXCL9|IL2RG|EBI3|LTB|IL12RB1|TNFRSF1B|IRF1|STAT1|IL7|IL2RA|CSF2RA|PIM1|CSF2RB|GRB2|IL18R1|CSF1|HMOX1|IL17RA|SOCS1|PIK3R5|TGFB1|IL10RB|MYD88|CBL|FAS|IFNGR2|CD36|IRF9|IL1R2|BAK1|TNF|IL15RA|IFNAR1|PTPN2|ITGA4
HALLMARK_INFLAMMATORY_RESPONSE	3.23845e-09	5.39741e-08	0.774939	0.712513	1.96395	192	CXCL9|CXCR6|LCK|SLAMF1|GP1BA|CD48|CCL17|CD69|EBI3|IL18RAP|IL2RB|LTA|SELL|TNFRSF9|IL10RA|CCR7|GPR183|TNFRSF1B|GPR132|IL7R|RGS1|CD40|LCP2|CD70|IRF1|PTGER4|PTGER2|CHST2|SEMA4D|CX3CL1|CD82|RNF144B|LYN|RHOG|LPAR1|NOD2|IL18R1|GCH1|CSF1
HALLMARK_INTERFERON_ALPHA_RESPONSE	2.30181e-05	0.000164415	0.57561	0.739918	1.90065	95	SELL|PSMB9|GBP4|CD74|B2M|IRF1|IL7|TXNIP|EPSTI1|SP110|IRF2|LPAR6|TRAFD1|SAMD9|PSME1|PSMB8|SAMD9L|UBE2L6|UBA7|CASP8|CSF1|ISG20|RTP4|TRIM14|TRIM21|ELF1|OGFR|OASL|NUB1|CASP1|DDX60|HLA-C|LAP3|PSME2|PARP14|GBP2|TMEM140|NMI|LAMP3|IRF9|PSMA3
HALLMARK_INTERFERON_GAMMA_RESPONSE	1.22236e-15	3.05591e-14	1.01754	0.787009	2.17689	198	CXCL9|KLRK1|GPR18|CD69|FGL2|IL2RB|HLA-DQA1|STAT4|IL10RA|PSMB9|BANK1|GBP4|ST3GAL5|CD74|CIITA|HLA-DMA|CD40|VAMP5|IRF8|LCP2|BTG1|CD86|ITGB7|B2M|IRF1|STAT1|IL7|JAK2|PSMB10|ST8SIA4|TXNIP|PTPN6|NLRC5|TNFAIP3|LYSMD2|EPSTI1|PIM1|HLA-A|HLA-B|EIF4E3|IRF5|IL18BP|SP110|CSF2RB|IRF2|TRAFD1|NCOA3|HLA-G|HLA-DRB1|PSME1|PSMB8|SAMD9L|UBE2L6|RAPGEF6|GCH1|CASP8|ISG20|VCAM1|SAMHD1|RTP4|TRIM14|NFKBIA|TRIM21|CASP4|SOCS1…
HALLMARK_KRAS_SIGNALING_DN	0.0539877	0.171552	0.213928	0.50322	1.35511	154	TCL1A|IFNG|PDCD1|GP1BA|CD40LG|TENM2|PTPRJ|CHST2|SNN|PDE6B|CD80
HALLMARK_KRAS_SIGNALING_UP	0.00641692	0.0267372	0.407018	0.554086	1.52073	184	IL2RG|MAP4K1|IKZF1|CD37|IL10RA|PDCD1LG2|LCP1|TNFRSF1B|IL7R|ABCB1|IRF8|BIRC3|RELN|LAPTM5|DOCK2|TRAF1|EPB41L3|TNFAIP3|CSF2RA|TMEM176A|F13A1|LAT2|CCND2|LY96|PSMB8|ACE|GLRX|NIN|MAFB|MTMR10|ETS1|CMKLR1|CBL|CCSER2|TMEM176B|USP12|ID2|GYPC|CXCR4|CTSS|TLR8|NAP1L2|CLEC4A
HALLMARK_MITOTIC_SPINDLE	0.401316	0.627056	0.179782	-0.298885	-0.999363	198	SHROOM1|CYTH2|BCAR1|PCNT|CTTN|FLNB|CEP250|CENPJ|PDLIM5|CEP72|KIF3C|ARHGEF11|WASL|PLEKHG2|ECT2|CDC42EP2|KPTN|CDC42EP1|VCL|ARAP3|ARFIP2|ACTN4|FARP1|TBCD|TPX2|PALLD|ANLN|CDC42BPA|CEP131|BCR|KIF2C|CENPF|CNTROB|KIF22|KIF23|TTK|RACGAP1|INCENP|RASAL2|EZR|NET1|CDK5RAP2|DLG1|RHOT2|CKAP5|ESPL1|ALS2|RAPGEF5|KNTC1|OPHN1|NEDD9|ARL8A|SMC4|AURKA|NEK2|TRIO|NUMA1|TOP2A|ATG4B|CDK1|KIF4A|SYNPO|PRC1|HDAC6|ALMS1
HALLMARK_MTORC1_SIGNALING	0.870968	0.907258	0.115734	-0.249362	-0.833597	195	LDLR|DHCR7|SQLE|EBP|CYP51A1|ELOVL6|HSPA5|HMGCS1|CTH|ADIPOR2|CDKN1A|CD9|GBE1|ACACA|BHLHE40|HMGCR|UNG|RPN1|PNP|XBP1|CCNF|TUBG1|POLR3G|FDXR|ACSL3|TM7SF2|NUP205|PIK3R3|PDAP1|TMEM97|SERPINH1|ASNS|STC1|UCHL5|SCD|PLOD2|DHCR24|ARPC5L|SLC37A4|CALR|GMPS|GOT1
HALLMARK_MYC_TARGETS_V1	0.544811	0.736232	0.0492918	0.348302	0.962269	193	RPL34|RPL6|RPL14|EEF1B2|RPS3|RPS6|RPS2|UBE2E1|RPL18|RPLP0|NAP1L1|HDDC2|EIF3D|PCBP1|PRPS2|RPL22|SNRPB2|RPS5|PSMA4|STARD7|PRDX3|CNBP|RAN|PSMD7|PSMA6|PTGES3|SSB|PSMB3|SNRPD2|ODC1|USP1|TCP1|C1QBP|SF3A1|HNRNPA1|PSMA1|PSMA7|CUL1|TXNL4A|DUT|SLC25A3|SRSF7|KPNB1|DEK|MRPS18B|G3BP1|HNRNPC|UBE2L3|DDX18|RSL1D1
HALLMARK_MYC_TARGETS_V2	0.186667	0.405797	0.188204	-0.424237	-1.22307	58	UNG|RRP12|PRMT3|PPRC1|SLC29A2|IPO4|TBRG4|RABEPK|TMEM97|CBX3|AIMP2|MAP3K6|SLC19A1|BYSL|NOP2|NOP56|TCOF1|GNL3|TFB2M|HK2|PLK1|SORD|MRTO4|PLK4|RCL1|MCM4|GRWD1|NOP16|MYC
HALLMARK_MYOGENESIS	3.06714e-06	3.06714e-05	0.627257	-0.5572	-1.86423	194	CKM|TNNI2|STC2|CDH13|COL4A2|PTP4A3|SPEG|AGRN|PC|ATP2A1|DMPK|PDLIM7|FDPS|TPM2|APP|COL15A1|SH3BGR|BDKRB2|HBEGF|SPHK1|PSEN2|TEAD4|CDKN1A|SMTN|PICK1|IGFBP7|AK1|TAGLN|SLC6A8|ITGB4|BHLHE40
HALLMARK_NOTCH_SIGNALING	0.455801	0.633057	0.102822	-0.380442	-0.980538	32	NOTCH3|PSEN2|JAG1|KAT2A|HEYL|FZD1|PPARD|APH1A
HALLMARK_OXIDATIVE_PHOSPHORYLATION	0.78478	0.885984	0.0327971	0.299315	0.821494	184	ISCU|COX4I1|SLC25A6|NDUFS4|ALAS1|SDHD|COX7A2L|SLC25A11|SLC25A20|HADHA|NDUFV2|GPX4|UQCRC2|HADHB|OXA1L|ACADM|UQCRB|ACAA2|COX15|SDHB|ATP6V1C1|PRDX3|ATP6V1F|ETFA|CASP7|DECR1|MDH1|ATP6V0E1|LDHB|RHOT1|NDUFB8|SUCLG1|IMMT|UQCR11|COX7C|COX10|MTRF1|FDX1|SLC25A3|COX11|PDHB|COX6A1|MTRR|HCCS|MPC1|NDUFA2|ATP6V1H|PHB2|COX5A|UQCRH|TIMM8B|COX5B|IDH2|SLC25A5|UQCR10|MRPL11|LRPPRC|COX7B|PDK4|MRPS11
HALLMARK_P53_PATHWAY	0.791139	0.885984	0.120985	-0.2579	-0.86558	190	CDH13|PLK2|PDGFA|APP|HBEGF|JAG2|EPHA2|SPHK1|RAD9A|RETSAT|IER3|CDKN1A|HSPA4L|BLCAP|SLC19A2|EPS8L2|ABCC5|AK1|PTPN14|PIDD1|ITGB4|HRAS|ST14|CSRNP2|POLH|HEXIM1|SEC61A1|RAB40C|FDXR|CDKN2B
HALLMARK_PANCREAS_BETA_CELLS	0.20155	0.419897	0.118288	0.591597	1.27521	27	DPP4|FOXO1|LMO2|MAFB|SEC11A|AKT3
HALLMARK_PEROXISOME	0.434896	0.633057	0.0645031	0.392425	1.02268	102	ABCD2|ABCB1|HSD17B11|DHRS3|ACSL5|CAT|HMGCL|PEX2|STS|BCL10|ALDH1A1|CNBP|VPS4B|SCP2|ACSL1|MLYCD|SOD1|GSTK1|ITGB1BP1|ELOVL5|ABCB4|HSD17B4|ACSL4|ECI2|PRDX1|SLC23A2|SOD2|ALDH9A1|ATXN1|EPHX2|ESR2
HALLMARK_PI3K_AKT_MTOR_SIGNALING	0.00729861	0.0280716	0.407018	0.616171	1.60248	100	LCK|FASLG|PRKCB|IL2RG|CAMK4|SLA|VAV3|RPS6KA3|GRB2|IRAK4|ARPC3|ACTR2|DAPP1|CAB39|NCK1|RPS6KA1|ACTR3|MYD88|PIKFYVE|PFN1|UBE2D3|TBK1|CXCR4
HALLMARK_PROTEIN_SECRETION	0.574099	0.755393	0.0525899	0.365976	0.933564	93	RPS6KA3|SNAP23|SNX2|RAB9A|STX7|VAMP7|AP1G1|AP3B1|ATP7A|SGMS1|CTSC|CLTC|CLN5|VPS4B|PPT1|RAB5A|SOD1|M6PR|BNIP3|STX12|USO1|VAMP4|ATP6V1H|SSPN|GOSR2|MAPK1|LAMP2|ADAM10|STAM|SEC24D|CLTA|ANP32E|TMX1|GALC|GLA|BET1|AP3S1|IGF2R|VAMP3|RAB2A|CLCN3|AP2B1|ABCA1|NAPG
HALLMARK_REACTIVE_OXYGEN_SPECIES_PATHWAY	0.183432	0.405797	0.121543	0.548038	1.27191	46	IPCEF1|CAT|FES|GPX3|GLRX|MBP|ATOX1|LSP1|GPX4|HHEX|FTL|PDLIM1|SOD1|G6PD|HMOX2|PFKP|MSRA|PRDX1|PRNP|SOD2
HALLMARK_SPERMATOGENESIS	0.797386	0.885984	0.0365315	0.309375	0.799644	97	GFI1|CAMK4|LPIN1|ACRBP|ACE|NEFH
HALLMARK_TGF_BETA_SIGNALING	0.0548965	0.171552	0.321776	-0.509418	-1.44957	54	PMEPA1|CDH1|THBS1|LTBP2|SKIL|TJP1|BMPR1A|WWTR1
HALLMARK_TNFA_SIGNALING_VIA_NFKB	0.263345	0.454043	0.0855357	0.409595	1.13018	196	CD69|BCL2A1|PLEK|TNFRSF9|GPR183|IL7R|TNFAIP8|BTG1|BIRC3|IRF1|PTGER4|TRAF1|TNFAIP3|PNRC1|DUSP2|SNN|SLC2A3|CD80|STAT5A|GCH1|CSF1|TANK|NFKBIA|LITAF|CFLAR|TNFSF9|IFNGR2|TNIP1|ID2|EGR2
HALLMARK_UNFOLDED_PROTEIN_RESPONSE	0.695067	0.847643	0.10673	-0.290071	-0.89205	105	STC2|PDIA5|HSPA5|ARFGAP1|XBP1|TUBB2A|BAG3|CHAC1|KDELR3|SRPRB|ASNS|EIF4G1|FKBP14|VEGFA|CALR|ALDH18A1|NOP56|CKS1B|HYOU1|NFYA|DDX10
HALLMARK_UV_RESPONSE_DN	0.860321	0.907258	0.0302042	0.285498	0.766598	138	CELF2|KCNMA1|FYN|PIK3CD|ADD3|TGFBR2|LPAR1|GRK5
HALLMARK_UV_RESPONSE_UP	0.450777	0.633057	0.148262	-0.305671	-1.02044	150	GAL|CTSV|NR4A1|IGFBP2|PDLIM3|CYB5R1|SIGMAR1|TST|HYAL2|SLC6A8|BSG|PRPF3|CA2|RPN1|TYRO3|HSPA2
HALLMARK_WNT_BETA_CATENIN_SIGNALING	0.131965	0.314202	0.2114	-0.497473	-1.33826	40	NOTCH4|JAG2|CSNK1E|PSEN2|JAG1|PTCH1|KAT2A|NCSTN|WNT5B|FZD1|PPARD|AXIN1|HEY1|HEY2
HALLMARK_XENOBIOTIC_METABOLISM	0.677019	0.846273	0.130777	-0.270089	-0.902713	184	HGFAC|TGFB2|JUP|ARG2|PC|BCAR1|BPHL|SMOX|ASL|EPHA2|ACOX3|RETSAT|PDLIM5|POR|PTGR1|NFS1|LCAT|CA2|SLC12A4|ENTPD5|UGDH

## Sheet: C1D1_vs_week8_DEgenes
Supplementary Table 7. The results of DE analysis for paired samples between C1D1 and week 8 performed by DESeq2.
Gene	baseMean	log2FoldChange	lfcSE	pvalue	padj
A1BG	4831.87	-0.0274868	0.206494	0.448686	0.76877
A1BG-AS1	409.466	0.389971	0.278732	0.0177095	0.208793
A1CF	2749.69	-0.00114032	0.208247	0.962493	0.991208
A2M	76324.9	-0.0237931	0.19834	0.684839	0.888388
A2M-AS1	79.7798	0.113357	0.242665	0.0620812	0.352556
A2ML1	359.413	-0.0336481	0.210477	0.0688723	0.370037
A3GALT2	15.2847	0.0382736	0.206267	0.436117	0.759951
A4GALT	1239.95	0.587455	0.301191	0.00328574	0.0940125
AAAS	1564.96	-0.0150351	0.14688	0.882693	0.965555
AACS	1258.98	-0.195293	0.248745	0.101984	0.433501
AADAC	1470.99	0.00924993	0.207552	0.521484	0.809095
AADAT	767.884	-0.0693647	0.214237	0.223446	0.593893
AAED1	828.186	0.11042	0.215387	0.229184	0.598086
AAGAB	1902.61	-0.0127343	0.165842	0.893722	0.968023
AAK1	6529.56	0.212126	0.182843	0.0892114	0.411244
AAMDC	415.815	-0.161404	0.261462	0.089912	0.411882
AAMP	2871.4	-0.255447	0.22858	0.0580089	0.34351
AAR2	985.42	0.0100109	0.150868	0.924647	0.979566
AARD	1152.97	-0.0422484	0.212095	0.0761923	0.387741
AARS	8234.09	-0.191883	0.204817	0.11911	0.462518
AARS2	2020.3	-0.0506322	0.147739	0.628772	0.861975
AASDH	2215.45	0.00152828	0.172586	0.992969	0.998704
AASDHPPT	1185.5	0.00851953	0.169655	0.93089	0.981217
AASS	2590.45	0.0105662	0.195379	0.874256	0.96238
AATF	2475.87	0.0149419	0.141841	0.886625	0.966036
AATK	615.728	-0.0350567	0.206834	0.382818	0.724572
ABAT	2119	-0.0118398	0.198471	0.843442	0.951962
ABCA1	18125.9	0.0320281	0.200963	0.579044	0.839269
ABCA10	1354.88	0.110257	0.237854	0.0826623	0.401391
ABCA11P	400.699	0.156013	0.226575	0.157819	0.517399
ABCA12	655.265	-0.0423959	0.21259	0.0431559	0.302525
ABCA13	603.374	0.0310603	0.20957	0.170195	0.532584
ABCA2	11272.4	0.0803837	0.193257	0.399033	0.736838
ABCA3	7074.8	-0.0135369	0.199292	0.79606	0.934863
ABCA4	186.701	0.0230517	0.20014	0.67526	0.883397
ABCA5	3372.19	0.00379897	0.194332	0.959913	0.991208
ABCA6	6154.98	0.0903366	0.224514	0.139236	0.490483
ABCA7	5007.67	0.197847	0.254262	0.0961491	0.422386
ABCA8	3868.84	0.0160624	0.206325	0.551625	0.825994
ABCA9	2365.26	0.0822573	0.210516	0.290565	0.652966
ABCB1	1569.22	0.0294569	0.207742	0.364814	0.71258
ABCB10	2218.53	-0.0707	0.167494	0.501423	0.797046
ABCB11	2795.74	0.0198451	0.20869	0.220082	0.593077
ABCB4	3380.03	0.00947836	0.205844	0.745918	0.915819
ABCB5	176.16	1.89973	0.73702	0.000129038	0.0178817
ABCB6	1358.77	-1.00529	0.412513	0.000466479	0.0381983
ABCB7	2991.18	-0.190231	0.196502	0.12114	0.465516
ABCB8	1953.21	-0.130804	0.225134	0.177977	0.543526
ABCB9	516.796	-0.0301147	0.201579	0.567255	0.835072
ABCC1	6780.47	0.0512514	0.179431	0.598548	0.847975
ABCC10	4053.1	0.0993709	0.181635	0.353661	0.704545
ABCC11	4784.39	-0.0501522	0.214226	0.0634679	0.355997
ABCC12	326.214	-0.017094	0.207967	0.296373	0.658586
ABCC13	13.9134	0.0370565	0.212176	0.143967	0.4974
ABCC2	4526.82	-0.0358772	0.207969	0.343632	0.696177
ABCC3	7178.74	-0.00909637	0.200565	0.842011	0.9519
ABCC4	1860.19	0.0846453	0.20952	0.270155	0.63515
ABCC5	7163.29	0.00993388	0.182482	0.911519	0.974965
ABCC6	2126.61	-0.0412146	0.210856	0.1608	0.521853
ABCC6P1	419.398	-0.0275775	0.20851	0.261241	0.626833
ABCC6P2	47.3466	-0.0356863	0.210768	0.0851963	0.405591
ABCC8	741.233	-0.00490299	0.20606	0.791463	0.933245
ABCC9	4451.44	0.0179668	0.202734	0.698031	0.893747
ABCD1	2986.52	-0.0402101	0.188138	0.632485	0.863657
ABCD2	529.668	0.100432	0.237078	0.0375289	0.284427
ABCD3	5201.45	-0.0449643	0.200864	0.45721	0.773952
ABCD4	2232.68	0.0620781	0.181229	0.527711	0.813095
ABCE1	5479.7	-0.102422	0.156972	0.348492	0.700236
ABCF1	4060.69	-0.124454	0.154621	0.248368	0.61512
ABCF2	2803.75	-0.0784752	0.181168	0.437573	0.761116
ABCF3	3307.47	-0.211572	0.19851	0.0928376	0.41694
ABCG1	4301.02	0.412719	0.294736	0.0150818	0.194678
ABCG2	667.247	-0.0427927	0.205281	0.420455	0.748894
ABCG4	26.7131	-0.00132112	0.200971	0.975298	0.995671
ABCG5	817.452	-0.0205492	0.209008	0.0972156	0.424361
ABCG8	1270.27	-0.0115464	0.208331	0.260186	0.625978
ABHD1	130.151	-0.0253838	0.205745	0.474132	0.784558
ABHD10	719.033	-0.0442088	0.180992	0.634684	0.864955
ABHD11	1454.59	-0.135044	0.250888	0.0858258	0.406241
ABHD12	2771.76	0.152881	0.193999	0.188102	0.554701
ABHD12B	17.4171	0.00571557	0.207291	0.74367	0.914638
ABHD13	864.757	0.113265	0.201884	0.272429	0.636664
ABHD14A	490.589	0.0204645	0.196646	0.752421	0.918554
ABHD14B	1316.94	-0.012463	0.19454	0.843522	0.951962
ABHD15	612.725	0.0574378	0.187952	0.530402	0.81397
ABHD16A	2202.06	-0.0887557	0.189065	0.385421	0.726444
ABHD16B	18.7055	0.0538618	0.205387	0.410326	0.743649
ABHD17A	1760.77	0.200739	0.227129	0.107755	0.443561
ABHD17B	777.86	-0.0249473	0.183128	0.771432	0.926613
ABHD17C	925.164	-0.0623351	0.207168	0.341582	0.694695
ABHD2	7207.78	0.0326259	0.186994	0.702042	0.896526
ABHD3	1752.11	0.0837862	0.186474	0.410347	0.743649
ABHD4	964.416	0.118725	0.197801	0.266291	0.631259
ABHD5	1050.45	-0.0603135	0.182195	0.528179	0.813234
ABHD6	606.791	0.00902768	0.202094	0.833716	0.948975
ABHD8	920.92	-0.0106387	0.175439	0.905359	0.972247
ABI1	7315.25	0.0915073	0.172709	0.395592	0.734171
ABI2	3332.52	-0.0254984	0.184856	0.760703	0.922212
ABI3	2183.89	0.0918367	0.224021	0.151941	0.510199
ABI3BP	7155.9	0.189211	0.306548	0.0412223	0.295631
ABL1	30264.5	-0.00778674	0.172026	0.932577	0.981867
ABL2	4115.72	-0.0730763	0.180709	0.439074	0.762182
ABLIM1	5317	-0.0537195	0.211861	0.192856	0.561444
ABLIM2	742.457	-0.166128	0.291708	0.0278089	0.252636
ABLIM3	2188.88	0.0355487	0.200102	0.562248	0.831669
ABO	423.715	0.184193	0.284015	0.0678006	0.367058
ABR	10210.2	0.613385	0.384877	0.00512786	0.115618
ABRACL	1725.07	0.0548296	0.183827	0.561182	0.831456
ABT1	1013.92	-0.052219	0.130315	0.617048	0.856799
ABTB1	2429.49	0.291616	0.227721	0.0363181	0.280427
ABTB2	1390.65	-0.283089	0.570682	0.00574595	0.12382
ACAA1	3168.05	-0.0495157	0.20458	0.410749	0.743649
ACAA2	3141.24	-0.0234918	0.203837	0.576977	0.838503
ACACA	8420.59	-0.370213	0.398189	0.022981	0.235362
ACACB	8242.91	0.0214128	0.200049	0.702532	0.896706
ACAD10	3086.95	-0.0486751	0.159641	0.640732	0.867005
ACAD11	70.0661	-0.114867	0.230602	0.156492	0.516339
ACAD8	1175.67	-0.013152	0.187037	0.865971	0.960836
ACAD9	4374.35	-0.248202	0.20745	0.0603995	0.348861
ACADL	468.725	0.0152007	0.207447	0.472045	0.783301
ACADM	3838.68	-0.0394602	0.199258	0.544805	0.82255
ACADS	1133.37	-0.00493147	0.200012	0.917816	0.977329
ACADSB	4379.17	-0.036113	0.204458	0.455044	0.772913
ACADVL	14460.2	-0.161236	0.248647	0.115217	0.454385
ACAN	1105.31	-0.0271208	0.208509	0.288518	0.650604
ACAP1	1951.32	0.276792	0.540032	0.00682507	0.13376
ACAP2	5637.33	0.210722	0.207318	0.0950583	0.420652
ACAP3	3742.52	-0.0875257	0.197205	0.36146	0.709796
ACAT1	5983.15	-0.0492513	0.20898	0.304224	0.665444
ACAT2	1455.43	-0.111669	0.233795	0.119329	0.462746
ACBD3	5999.7	-0.0762857	0.187301	0.42723	0.754338
ACBD4	1244.66	-0.029193	0.189804	0.706165	0.898099
ACBD5	2650.86	-0.0583281	0.200721	0.43148	0.756654
ACBD6	1987.36	-0.135352	0.220097	0.187727	0.553937
ACBD7	95.9953	-0.130917	0.247357	0.0925481	0.416714
ACCS	1311.58	0.192613	0.252687	0.100198	0.430394
ACD	943.635	0.0546872	0.177081	0.582342	0.840549
ACE	6019.69	0.0366953	0.174795	0.703122	0.897039
ACE2	117.326	-0.0763433	0.225678	0.0113808	0.169358
ACER1	16.8822	-0.00347266	0.206646	0.826072	0.947544
ACER2	314.443	0.105532	0.214163	0.242869	0.61085
ACER3	1102.94	0.0496547	0.181223	0.604103	0.850224
ACHE	240.365	0.00994549	0.196747	0.880992	0.965042
ACIN1	13643.5	0.0244847	0.154533	0.815788	0.943137
ACKR1	1058.48	0.06238	0.218182	0.0519929	0.327845
ACKR2	378.076	-0.0791151	0.221612	0.115207	0.454385
ACKR3	855.683	0.0640603	0.181188	0.519069	0.807488
ACKR4	129.654	0.043276	0.193822	0.584083	0.84131
ACLY	11990.3	-0.0866906	0.186568	0.389865	0.729479
ACMSD	572.746	-0.00529779	0.207545	0.777697	0.928566
ACN9	442.224	-0.0759407	0.218992	0.142646	0.49619
ACO1	3844.57	0.00294844	0.19818	0.9951	0.999427
ACO2	9351.22	-0.303224	0.345513	0.0360598	0.279887
ACOT1	250.659	-0.0312551	0.198627	0.623974	0.85984
ACOT11	787.598	0.128824	0.212784	0.214907	0.58581
ACOT12	728.923	-0.0256578	0.208658	0.288676	0.650807
ACOT13	769.999	-0.128781	0.213324	0.21208	0.582679
ACOT2	1004.18	-0.00293627	0.194098	0.92631	0.979683
ACOT4	205.637	-0.0407692	0.194008	0.605231	0.850504
ACOT7	1110.45	-0.284666	0.197163	0.0341576	0.274709
ACOT8	867.819	0.045865	0.142215	0.661528	0.876345
ACOT9	1790.77	0.0566351	0.193433	0.509604	0.801442
ACOX1	4484.37	-0.0504121	0.207101	0.354768	0.705346
ACOX2	2023.94	0.0147784	0.205061	0.652263	0.871983
ACOX3	1641.86	-0.0136679	0.173881	0.887715	0.966395
ACOXL	337.231	-0.0511968	0.20974	0.275622	0.639346
ACP1	1703.93	-0.147095	0.203516	0.178757	0.544524
ACP2	3011.15	0.062081	0.193697	0.478896	0.787823
ACP5	5837.61	0.0744767	0.217278	0.177144	0.542546
ACP6	759.455	-0.157052	0.230663	0.149623	0.506148
ACPP	167.689	0.0913404	0.197422	0.346068	0.698299
ACR	74.2909	0.00659829	0.200334	0.897575	0.969356
ACRBP	502.656	-0.0350443	0.192826	0.643037	0.867609
ACRC	756.924	0.20316	0.274195	0.0807476	0.397016
ACSF2	2140.7	-0.0206197	0.194994	0.755132	0.919136
ACSF3	2479.79	0.169137	0.205923	0.156395	0.516207
ACSL1	9727.39	-0.047709	0.205913	0.403196	0.739856
ACSL3	7211.33	-0.139327	0.19872	0.220376	0.593421
ACSL4	5303.91	0.239971	0.237408	0.068946	0.370102
ACSL5	3340.87	0.0152244	0.204926	0.669973	0.881298
ACSL6	614.835	-0.0121079	0.205153	0.673728	0.882642
ACSM1	60.0624	-0.00682503	0.198845	0.902345	0.971478
ACSM2A	4340.56	0.00198161	0.208249	0.136715	0.487115
ACSM2B	4270.04	0.0093717	0.208207	0.27613	0.639833
ACSM3	892.339	0.011544	0.204859	0.736242	0.910761
ACSM5	1399.56	0.0299701	0.209626	0.17281	0.536329
ACSS1	2115.15	0.162172	0.199144	0.169696	0.531973
ACSS2	2203.96	-0.0164922	0.18887	0.814312	0.942527
ACSS3	1899.99	0.00724874	0.200007	0.891599	0.967485
ACTA1	1174.21	0.0186353	0.19967	0.735913	0.910758
ACTA2	15136.3	0.0771241	0.212042	0.284758	0.647308
ACTA2-AS1	34.1604	0.0604834	0.212785	0.236222	0.604565
ACTB	246456	0.252261	0.198529	0.0552714	0.335823
ACTC1	405.305	-0.0780982	0.226511	0.0164086	0.202605
ACTG1	104388	-0.021634	0.17769	0.808885	0.940531
ACTG2	14820.3	-0.00689245	0.190535	0.922249	0.97879
ACTL10	178.616	0.0571147	0.196102	0.468462	0.781323
ACTL6A	3137.64	-0.188558	0.276833	0.0772181	0.389441
ACTL8	45.2614	-0.0175592	0.208498	0.215154	0.585942
ACTN1	29506.5	-0.00440534	0.180469	0.957001	0.990186
ACTN2	337.649	-0.0401618	0.204119	0.460884	0.776037
ACTN3	62.9308	0.0113311	0.198934	0.84031	0.950972
ACTN4	75682.9	-0.201208	0.323156	0.0338121	0.273724
ACTR10	2277.54	0.0887236	0.149513	0.413349	0.744563
ACTR1A	2335.95	0.0716924	0.145102	0.506751	0.799583
ACTR1B	2870.58	-0.019542	0.143517	0.848507	0.953696
ACTR2	17431.2	0.223157	0.203697	0.0826873	0.401405
ACTR3	15421	0.251023	0.237028	0.0640151	0.357155
ACTR3B	1228.43	-0.487464	0.2765	0.00683094	0.13376
ACTR3C	1104.29	-0.139904	0.213313	0.195237	0.565027
ACTR5	717.951	0.0688256	0.183814	0.484431	0.791396
ACTR6	1973.05	-0.00968381	0.178285	0.884328	0.965836
ACTR8	1833.4	0.0784304	0.151914	0.465912	0.779737
ACTRT3	103.952	-0.0164559	0.189742	0.829488	0.947544
ACVR1	1982.02	0.137373	0.185713	0.227506	0.597539
ACVR1B	1522.35	-0.162514	0.238289	0.132292	0.480493
ACVR1C	44.7497	-0.109054	0.238374	0.0777788	0.390765
ACVR2A	1806.27	0.141613	0.203619	0.208116	0.578512
ACVR2B	940.168	-0.266792	0.317894	0.0481327	0.317261
ACVRL1	1980.51	0.334214	0.234412	0.0264008	0.248231
ACY3	155.174	-0.0214559	0.207152	0.399731	0.737104
ACYP1	582.964	-0.119659	0.196146	0.264626	0.629753
ACYP2	180.712	0.0428147	0.201375	0.512633	0.803085
ADA	1220.07	0.325211	0.308736	0.0337105	0.27354
ADAL	527.238	-0.0057011	0.178831	0.944578	0.986411
ADAM10	10297.4	0.120825	0.205678	0.259634	0.625786
ADAM11	101.982	-0.00454468	0.186256	0.951508	0.988035
ADAM12	3357.69	0.0899013	0.226004	0.112245	0.450937
ADAM15	11272.4	-0.182948	0.291393	0.0557227	0.337087
ADAM17	5806.07	0.100903	0.18402	0.339159	0.693052
ADAM19	2947.75	0.252385	0.25411	0.0626709	0.354368
ADAM1A	413.421	0.0379485	0.198263	0.575865	0.838503
ADAM20	399.851	0.155887	0.168054	0.179077	0.544761
ADAM20P1	77.6696	0.00380091	0.183766	0.966464	0.992693
ADAM21	44.6141	-0.0641203	0.218524	0.0732923	0.381235
ADAM22	901.011	-0.0381829	0.206433	0.381401	0.723733
ADAM23	251.417	0.0634947	0.213369	0.223131	0.593875
ADAM28	3105.65	0.352072	0.506082	0.0199353	0.220601
ADAM32	396.372	-0.0426717	0.198605	0.534384	0.816326
ADAM33	1118.06	1.98696	0.44355	1.22717e-07	0.000184228
ADAM8	2330.33	0.0473656	0.189384	0.586121	0.842751
ADAM9	10883.7	0.0102627	0.18212	0.871246	0.962036
ADAMDEC1	2369.35	0.483283	0.508678	0.0128119	0.180087
ADAMTS1	2691.29	-0.0649385	0.193015	0.443952	0.765233
ADAMTS10	2191.37	0.57012	0.235884	0.00131578	0.0638915
ADAMTS12	3188.06	0.0123799	0.200056	0.7832	0.93052
ADAMTS13	1223.13	-0.969053	0.464252	0.00100835	0.0558935
ADAMTS14	1419.59	0.0994261	0.226275	0.148621	0.504798
ADAMTS15	583.179	-0.10441	0.211179	0.25583	0.623213
ADAMTS16	565.604	0.0732595	0.221989	0.062096	0.352556
ADAMTS17	843.141	-1.75499	0.331445	3.14615e-09	1.13356e-05
ADAMTS18	132.277	0.184957	0.333064	0.00681265	0.133718
ADAMTS19	17.0017	-0.00760029	0.20085	0.876629	0.963425
ADAMTS2	7343.49	0.0637613	0.211059	0.276246	0.639978
ADAMTS3	247.541	-0.0166745	0.198222	0.767893	0.925855
ADAMTS4	1192.27	-0.100015	0.218144	0.218211	0.590871
ADAMTS5	1081.65	0.140636	0.243408	0.122967	0.468242
ADAMTS6	641.736	0.45755	0.272283	0.00859101	0.150114
ADAMTS7	1221.78	-0.0530778	0.173141	0.594307	0.847074
ADAMTS7P1	34.9182	0.134642	0.229298	0.178909	0.544618
ADAMTS8	244.772	-0.0552536	0.216489	0.0263762	0.248129
ADAMTS9	3705.16	-0.243953	0.260938	0.0677737	0.367058
ADAMTSL1	661.043	0.0281174	0.192627	0.699011	0.894695
ADAMTSL2	2118.57	-0.089474	0.218269	0.2027	0.572381
ADAMTSL3	1415.48	-0.0771985	0.222128	0.0898775	0.411882
ADAMTSL4	6453.87	-0.0842156	0.227595	0.0383521	0.28812
ADAMTSL5	185.305	0.0388068	0.195604	0.59899	0.848375
ADAP1	963.821	0.107446	0.21994	0.208978	0.579103
ADAP2	2478.45	0.0631566	0.208732	0.310219	0.671383
ADAR	30184.9	-0.109596	0.170273	0.319304	0.678492
ADARB1	3181.45	0.223928	0.255213	0.081157	0.398052
ADARB2	82.5134	0.10294	0.231439	0.11967	0.463225
ADAT1	1249.77	0.12869	0.184013	0.254193	0.621347
ADAT2	319.886	-0.0248751	0.188545	0.753759	0.918879
ADAT3	354.208	0.0145244	0.179778	0.876251	0.963355
ADCK1	433.848	0.00324061	0.17479	0.976046	0.995836
ADCK2	1943.96	0.0341082	0.172001	0.731756	0.908914
ADCK3	3606.24	-0.314974	0.29365	0.0353717	0.277548
ADCK4	1730.5	-0.173689	0.254067	0.104376	0.438253
ADCK5	886.201	-0.0982488	0.201565	0.30795	0.669449
ADCY1	810.82	-0.0531524	0.20127	0.470903	0.78281
ADCY10	138.016	-0.121495	0.25415	0.0202663	0.222084
ADCY10P1	55.7564	0.0790453	0.207	0.332036	0.68773
ADCY2	1494.39	0.0270533	0.208759	0.230513	0.599147
ADCY3	6319.35	-0.0184136	0.17155	0.845015	0.952375
ADCY4	1435.92	0.131092	0.22034	0.197302	0.56697
ADCY5	1064.11	-0.00431234	0.203377	0.89225	0.967929
ADCY6	4267.13	-0.184444	0.258707	0.0999225	0.429722
ADCY7	9125.62	0.180093	0.278885	0.071916	0.376307
ADCY8	17.3097	-0.00999478	0.208109	0.423366	0.751411
ADCY9	4371.24	-0.0520747	0.178739	0.61432	0.855218
ADCYAP1	248.234	-0.0184636	0.198904	0.757497	0.920326
ADCYAP1R1	50.7046	-0.0374156	0.207235	0.379064	0.72239
ADD1	10888.4	0.0443075	0.167475	0.681017	0.886518
ADD2	1184.46	0.0104222	0.203983	0.766919	0.925479
ADD3	6939.8	0.402362	0.622648	0.0145101	0.190385
ADGB	35.8714	0.0770409	0.226884	0.0141721	0.188282
ADH1A	7465.88	0.0144086	0.208167	0.286977	0.648555
ADH1B	34562.3	0.0022062	0.207956	0.830364	0.947553
ADH1C	5730.14	0.0251099	0.209183	0.182911	0.54855
ADH4	13050.2	-0.00590207	0.208239	0.370072	0.715788
ADH5	4191.51	-0.0146798	0.189797	0.849527	0.95395
ADH6	1750.59	-0.000696035	0.208148	0.995805	0.999539
ADHFE1	1416.42	-0.0200141	0.200482	0.697253	0.893323
ADI1	3107.14	-0.0719519	0.216311	0.186134	0.551564
ADIPOQ	16.201	0.00794421	0.207546	0.730925	0.908816
ADIPOR1	4716.29	-0.0599376	0.183843	0.527465	0.812926
ADIPOR2	4042.79	-0.104887	0.221291	0.197581	0.56714
ADK	2855.97	-0.0864669	0.201582	0.332921	0.68841
ADM	584.151	-0.0241636	0.198518	0.686454	0.88897
ADM2	260.75	-0.0947003	0.230838	0.0694575	0.371079
ADM5	137.341	-0.0251169	0.203389	0.567311	0.835072
ADNP	12199.1	-0.0171403	0.175507	0.850636	0.954276
ADNP2	3023.29	-0.0426222	0.169959	0.668603	0.880953
ADO	817.644	0.0944961	0.17569	0.374442	0.71945
ADORA1	2180.31	-0.0200552	0.20258	0.649919	0.87044
ADORA2A-AS1	56.4701	-0.00654442	0.208344	0.488617	0.793227
ADORA2B	147.778	-0.0569431	0.170883	0.580686	0.840426
ADORA3	677.472	0.054435	0.206296	0.371977	0.717239
ADPGK	2218.53	0.0690569	0.180033	0.491745	0.794272
ADPRH	341.296	0.0903256	0.201841	0.331411	0.687196
ADPRHL1	170.33	-0.175996	0.265619	0.0928539	0.41694
ADPRHL2	868.086	0.0112445	0.176513	0.90035	0.970939
ADPRM	412.731	0.348048	0.40008	0.0262682	0.24753
ADRA1A	1514.22	-0.02064	0.207474	0.382348	0.724442
ADRA1B	233.295	-0.0143298	0.202241	0.738236	0.911708
ADRA1D	16.8346	0.0409382	0.210756	0.206176	0.577017
ADRA2A	808.855	0.12427	0.250561	0.0510146	0.32486
ADRA2B	55.0303	0.0364522	0.209584	0.255546	0.622854
ADRA2C	179.245	0.0104859	0.203463	0.774068	0.927205
ADRB1	105.839	0.0179079	0.205888	0.568436	0.835267
ADRB2	561.9	0.0408198	0.20621	0.418855	0.748059
ADRBK1	13966.5	0.134279	0.196347	0.230441	0.599147
ADRBK2	5589.43	0.0912403	0.201994	0.347493	0.699407
ADRM1	4809.74	-0.125641	0.171124	0.262364	0.627262
ADSL	2803.4	-0.0898303	0.183672	0.387568	0.727644
ADSS	7986.72	-0.0566863	0.193298	0.504996	0.798727
ADSSL1	547.873	-0.0900614	0.224504	0.129835	0.477133
ADTRP	82.1701	0.0371384	0.202014	0.535372	0.816981
AEBP1	47907.1	0.0607646	0.209217	0.306822	0.667963
AEBP2	3654.9	-0.0434152	0.192397	0.609898	0.853066
AEN	787.803	-0.100473	0.168212	0.357598	0.707412
AES	11550.7	-0.00171617	0.178279	0.981981	0.996251
AFAP1	2651.71	0.00921771	0.192735	0.905521	0.972247
AFAP1-AS1	236.348	-0.0948459	0.234985	0.0226586	0.23419
AFAP1L1	1139.37	-0.0330214	0.167869	0.732004	0.90895
AFAP1L2	967.985	0.174432	0.247374	0.11961	0.463094
AFF1	12236	0.136434	0.15665	0.224918	0.594905
AFF2	573.048	0.0696821	0.21863	0.118498	0.461053
AFF3	8782.06	0.00910911	0.204831	0.795029	0.934398
AFF4	10143.5	0.099152	0.169901	0.36742	0.714572
AFG3L1P	161.951	0.104427	0.183113	0.334362	0.689562
AFG3L2	6556.89	-0.124077	0.208744	0.229455	0.598384
AFM	4064.93	-0.00698705	0.208418	0.556197	0.828399
AFMID	1011.03	-0.115427	0.23549	0.120327	0.463974
AFP	28.6957	-0.0134125	0.208592	0.414624	0.745138
AFTPH	5284.63	0.130097	0.158169	0.259258	0.625786
AGA	766.498	0.11306	0.188458	0.296994	0.659092
AGAP1	4926.82	-0.124204	0.23526	0.14148	0.494726
AGAP11	667.796	0.174913	0.270076	0.0843186	0.403882
AGAP2	1509.34	1.15584	0.458418	0.000284961	0.0289029
AGAP2-AS1	469.963	0.0243825	0.192318	0.749704	0.91738
AGAP3	6188.33	0.00154154	0.180332	0.978812	0.996147
AGAP4	645.385	-0.0539586	0.166761	0.599195	0.848375
AGAP6	3101.18	-0.0504096	0.171224	0.609908	0.853066
AGAP7P	50.0408	-0.0393731	0.197663	0.586552	0.842912
AGBL1	182.766	0.0136563	0.206678	0.568106	0.835124
AGBL2	418.89	0.139134	0.242183	0.125598	0.471909
AGBL3	237.037	-0.148303	0.190952	0.200532	0.570527
AGBL4	81.6391	-0.0946298	0.226924	0.132166	0.480229
AGBL5	1929.63	-0.0799806	0.200096	0.361561	0.709796
AGER	1092.26	0.0651485	0.176875	0.514549	0.804444
AGFG1	7392.34	0.00555263	0.13269	0.949649	0.987714
AGFG2	2073.95	-0.0279267	0.20103	0.605747	0.850504
AGGF1	5057.96	0.210015	0.231374	0.0929396	0.417221
AGK	1512.75	-0.0192038	0.15205	0.845124	0.952375
AGL	6367.71	-0.071084	0.174255	0.48471	0.791396
AGMAT	684.79	-0.0286561	0.207514	0.376454	0.720627
AGMO	631.184	-0.0128595	0.205477	0.679201	0.884986
AGO1	4625.61	0.0244452	0.185772	0.77338	0.926858
AGO2	9318.16	-0.0763457	0.199741	0.375744	0.720346
AGO3	5081.16	0.0284848	0.180124	0.757559	0.920326
AGO4	3562.31	0.125166	0.205591	0.241673	0.610462
AGPAT1	2059.41	-0.0401947	0.163477	0.695019	0.8924
AGPAT2	1910.78	-0.130594	0.220144	0.19086	0.5583
AGPAT3	4582.5	-0.0965011	0.205004	0.294456	0.657114
AGPAT4	606.07	0.0154443	0.192264	0.83401	0.948975
AGPAT4-IT1	92.5603	0.0155807	0.201716	0.732767	0.909453
AGPAT5	2517.44	-0.0598387	0.198321	0.446895	0.766975
AGPAT6	6889.01	-0.101319	0.229876	0.118329	0.460807
AGPAT9	322.532	-0.012946	0.195733	0.836555	0.950126
AGPS	4653.72	0.145216	0.17632	0.206125	0.576964
AGR2	1601.51	-0.0154001	0.207039	0.430377	0.756562
AGR3	1656.62	-0.0160288	0.206191	0.575978	0.838503
AGRN	20363.6	-0.084954	0.2234	0.125769	0.471909
AGT	6241.46	-0.171021	0.32761	5.56721e-05	0.0111807
AGTPBP1	4316.5	0.104031	0.2178	0.22585	0.595823
AGTR1	463.621	0.0460933	0.213346	0.0860918	0.406341
AGTR2	28.1045	0.000881762	0.208125	0.981127	0.996147
AGTRAP	1193.78	0.0465678	0.195585	0.54904	0.825045
AGXT	7921.55	-0.00595763	0.208026	0.716195	0.902255
AGXT2	552.667	-0.0374935	0.212612	0.0086436	0.150886
AHCTF1	17618.9	-0.141229	0.23204	0.163539	0.524507
AHCTF1P1	889.776	-0.0580668	0.188155	0.517819	0.806439
AHCY	4331.41	-0.607157	0.274252	0.00171759	0.069616
AHCYL1	4187.47	-0.0773245	0.176841	0.416271	0.74633
AHCYL2	1520.73	-0.0512927	0.179595	0.591712	0.845337
AHDC1	6767.71	-0.010235	0.181754	0.902681	0.971724
AHI1	5244.18	-0.0387793	0.160643	0.705094	0.897834
AHNAK	370334	0.437362	0.424668	0.0163196	0.201668
AHNAK2	21278.6	0.0353522	0.19484	0.629111	0.862055
AHR	12974	0.0687565	0.205358	0.356383	0.706758
AHRR	112.385	-0.0474577	0.196353	0.533306	0.815907
AHSA1	3173.18	-0.178246	0.19249	0.142507	0.496153
AHSA2	2604.32	0.228139	0.201177	0.0767408	0.388666
AHSG	10756.4	-0.00566391	0.20817	0.495736	0.795678
AICDA	41.4168	0.0705704	0.223806	0.0400667	0.2926
AIDA	4276.39	0.138373	0.15951	0.227569	0.597616
AIF1	1043.75	0.0874266	0.223974	0.129147	0.476175
AIF1L	1186.04	-0.0708526	0.215654	0.195429	0.565027
AIFM1	2784.28	-0.327299	0.360923	0.0293402	0.25834
AIFM2	801.933	-0.196901	0.206814	0.114744	0.454385
AIFM3	435.056	0.0168245	0.195772	0.797447	0.935617
AIG1	1498.35	-0.0551507	0.20307	0.418645	0.747981
AIM1	7442.5	0.00233134	0.197053	0.976964	0.996002
AIM1L	490.305	-0.0859176	0.228066	0.0534635	0.331455
AIM2	1246.56	0.170016	0.295629	0.0261517	0.247033
AIMP1	2001.71	0.00256719	0.159753	0.969752	0.994141
AIMP2	1059.42	-0.51384	0.218693	0.00189763	0.0728885
AIP	2134.51	0.0670752	0.154695	0.532455	0.815522
AIRE	30.1668	0.0612475	0.21718	0.101075	0.431953
AJAP1	132.198	0.0462142	0.190588	0.581691	0.840474
AJUBA	859.803	-0.21469	0.188146	0.0838795	0.403271
AK1	1232.2	-0.136579	0.215263	0.198923	0.568572
AK2	3475.36	-0.151113	0.216768	0.167309	0.529619
AK3	1954.9	-0.0534873	0.201846	0.438546	0.762056
AK4	732.437	-0.118152	0.248007	0.0393584	0.29071
AK5	182.241	1.00756	0.6468	0.00221961	0.0776943
AK7	87.5157	-0.0153867	0.197352	0.79886	0.936144
AK8	126.152	0.0046974	0.195743	0.941594	0.985408
AK9	988.371	0.122187	0.206595	0.239997	0.608343
AKAP1	4984.1	-0.520001	0.490051	0.0105089	0.164565
AKAP10	3683.2	0.244442	0.247975	0.0703553	0.37375
AKAP11	9652.77	0.437404	0.25343	0.0101603	0.162124
AKAP12	2184.19	0.128651	0.248889	0.0762623	0.387988
AKAP13	21276.4	0.42866	0.296063	0.0129375	0.180393
AKAP17A	3894.65	0.0571277	0.17492	0.571036	0.836835
AKAP2	27.2906	0.155145	0.255947	0.11065	0.448091
AKAP3	326.524	-0.0781821	0.218824	0.165013	0.526795
AKAP5	241.135	0.533245	0.425195	0.00972754	0.159601
AKAP6	579.468	0.0126857	0.189996	0.864711	0.960034
AKAP7	535.401	0.0254218	0.200356	0.653603	0.872908
AKAP8	3093.67	-0.089131	0.14786	0.395999	0.734422
AKAP8L	5785.16	-0.0637395	0.173463	0.529795	0.813599
AKAP9	187715	-0.223027	0.294695	0.0635617	0.356163
AKIP1	580.785	0.0951266	0.18992	0.354533	0.705114
AKIRIN1	2826.6	-0.0287013	0.186405	0.759124	0.921443
AKIRIN2	1321.56	0.0524521	0.195939	0.510427	0.801883
AKNA	12558	0.268042	0.47742	0.0118638	0.173057
AKR1A1	4250.12	-0.00525268	0.187195	0.904795	0.972141
AKR1B1	1433.71	0.0830308	0.219306	0.180349	0.546232
AKR1B10	63.7041	-0.0737672	0.225696	0.0119133	0.173498
AKR1B15	241.121	-0.0918772	0.236059	0.0106853	0.165154
AKR1C1	4032.89	-0.118998	0.254128	0.0104259	0.164013
AKR1C2	1476.94	-0.0429517	0.210476	0.225658	0.595823
AKR1C3	1366.8	-0.0251014	0.204733	0.541561	0.82087
AKR1C4	2138.26	-0.00695867	0.208418	5.62137e-22	1.01269e-17
AKR1CL1	232.814	-0.00811511	0.204921	0.80506	0.939121
AKR1D1	1172.57	-0.0346556	0.211703	0.0275727	0.252447
AKR1E2	521.248	-0.0196563	0.202978	0.653711	0.872922
AKR7A2	3098.66	-0.00645975	0.157164	0.946717	0.987157
AKR7A3	1767.12	-0.177324	0.298997	0.0357966	0.278884
AKR7L	330.983	-0.277364	0.479182	0.0151206	0.194708
AKT1	46129.5	-0.0934032	0.208114	0.284261	0.646707
AKT1S1	1211.37	-0.143068	0.201579	0.202815	0.572504
AKT2	39465.2	-0.354942	0.374145	0.0258308	0.245736
AKT3	30873.4	0.289801	0.335252	0.0407886	0.293633
AKTIP	1345.17	0.148057	0.21525	0.186151	0.551564
ALAD	1193.83	-0.037944	0.19702	0.581522	0.840474
ALAS1	3681.8	-0.0241611	0.19932	0.657202	0.874651
ALAS2	97.9934	0.0769978	0.227163	0.00262317	0.084236
ALB	162036	-0.0361864	0.21095	0.112568	0.451549
ALCAM	8703.7	-0.123506	0.237659	0.133681	0.482984
ALDH16A1	1953.35	0.0208521	0.151852	0.858108	0.957715
ALDH18A1	3677.63	-0.0833954	0.194702	0.377266	0.720981
ALDH1A1	9605.84	0.0434283	0.211312	0.190834	0.5583
ALDH1A2	103.64	-0.0100886	0.203666	0.782798	0.930403
ALDH1A3	1600.53	-0.00851814	0.199751	0.860007	0.958312
ALDH1B1	1399.27	-0.260449	0.423928	0.020356	0.222116
ALDH1L1	7655.48	-0.027097	0.209297	0.118625	0.461363
ALDH1L2	1693.25	0.0729043	0.217054	0.176118	0.541093
ALDH2	24675.4	0.00419127	0.204599	0.904672	0.972141
ALDH3A1	43.9254	0.003363	0.202705	0.924126	0.979316
ALDH3A2	7147.01	-0.0364009	0.188452	0.661576	0.876345
ALDH3B1	2791.96	0.14181	0.248368	0.109134	0.445648
ALDH3B2	788.443	-0.0882825	0.22908	0.0495633	0.322158
ALDH4A1	2170.23	-0.170766	0.308194	0.0112114	0.16819
ALDH5A1	713.695	-0.0609198	0.212724	0.218927	0.591543
ALDH6A1	3675.74	-0.0526882	0.210024	0.280195	0.642522
ALDH7A1	6786.97	-0.7413	0.251342	0.000188749	0.022979
ALDH8A1	993.502	-0.0290356	0.207271	0.381507	0.723733
ALDH9A1	3851.39	-0.0950765	0.206701	0.298895	0.6602
ALDOA	27080.5	-0.0357634	0.180401	0.694254	0.892273
ALDOB	21578.5	-0.00432868	0.208153	0.545954	0.823597
ALDOC	689.399	-0.0616845	0.209617	0.293729	0.656354
ALG1	1034.91	0.0199928	0.145337	0.851971	0.955021
ALG10	1662.96	-0.0587069	0.160434	0.574923	0.838172
ALG10B	1155.05	0.00838148	0.167497	0.936831	0.983601
ALG11	655.132	-0.0842389	0.158505	0.43489	0.75872
ALG12	2478.64	-0.19551	0.161895	0.0947427	0.419978
ALG13	6074.44	0.169695	0.160753	0.142572	0.496153
ALG14	280.537	-0.253021	0.27551	0.0631484	0.35566
ALG1L	81.9894	-0.0401362	0.199696	0.552192	0.826224
ALG1L2	50.0408	-0.0819768	0.204667	0.341904	0.695004
ALG1L9P	113.411	-0.0327264	0.197887	0.601729	0.849208
ALG2	1078.91	-0.0939022	0.1456	0.382168	0.72433
ALG3	1296.5	-0.485437	0.339274	0.00988896	0.160464
ALG5	1690.11	-0.119683	0.19291	0.268326	0.633151
ALG6	1540.67	-0.0347768	0.174616	0.711472	0.900115
ALG8	2515.01	-0.138825	0.250391	0.0938627	0.418772
ALG9	1207.12	-0.0640271	0.175828	0.522797	0.809925
ALK	966.782	0.171365	0.275701	0.0707427	0.374129
ALKBH1	479.277	0.0652133	0.164263	0.535616	0.816981
ALKBH2	459.024	-0.169029	0.282814	0.0530007	0.330763
ALKBH3	975.264	0.0769595	0.144884	0.470753	0.782638
ALKBH4	508.331	-0.18281	0.268146	0.089431	0.411407
ALKBH5	4466.35	0.0832525	0.173696	0.431434	0.756654
ALKBH6	623.677	-0.217598	0.284691	0.0711594	0.375042
ALKBH7	611.211	-0.0642898	0.205834	0.354114	0.70459
ALKBH8	955.762	0.0467509	0.18163	0.620335	0.85832
ALLC	49.2633	-0.0705388	0.224254	0.0166704	0.203881
ALMS1	15081	0.00481753	0.170535	0.963558	0.991394
ALMS1P	113.015	-0.210107	0.273381	0.0822987	0.400381
ALOX12B	12.814	-0.00854705	0.206655	0.714747	0.902009
ALOX15	183.354	0.0110331	0.205667	0.694625	0.892273
ALOX15B	532.776	0.153895	0.292672	0.00386042	0.100872
ALOX15P1	57.3648	0.022804	0.196445	0.737352	0.911257
ALOX5	5033.77	0.116359	0.228808	0.161269	0.522622
ALOX5AP	1450.31	0.819913	0.663477	0.00391612	0.101856
ALOXE3	56.0757	-0.0132438	0.206732	0.568411	0.835267
ALPI	81.4321	-0.00732787	0.208419	0.273567	0.638142
ALPK1	3056.07	0.256526	0.233212	0.0599288	0.347117
ALPK2	1617.63	0.0121269	0.204688	0.739065	0.911964
ALPK3	1006.58	-0.104166	0.20004	0.298294	0.659981
ALPL	1712.87	-0.0417023	0.207489	0.355661	0.706575
ALPP	96.3084	-0.055283	0.216958	0.0289919	0.256827
ALS2	3864.83	-0.14778	0.16518	0.197166	0.566862
ALS2CL	1697.46	-0.0959568	0.22412	0.157159	0.51693
ALS2CR11	108.576	1.24029	0.392479	5.7098e-05	0.0111807
ALS2CR12	213.29	0.130062	0.213663	0.212993	0.583847
ALX1	21.0426	-0.0414889	0.213742	0.0712476	0.37519
ALX3	13.5642	0.0187981	0.208709	0.275888	0.639542
ALYREF	1476.71	-0.126852	0.243317	0.0991187	0.427682
AMACR	94.9166	-0.0608027	0.211812	0.257327	0.624294
AMBP	15261.4	-0.028034	0.209802	0.0699401	0.372883
AMBRA1	5268.78	0.120359	0.175313	0.281337	0.643934
AMD1	4584.72	-0.021043	0.177099	0.817027	0.94369
AMDHD1	645.08	0.0101108	0.204753	0.763872	0.923815
AMDHD2	2131.49	0.0815069	0.197413	0.382324	0.724442
AMER1	1615.78	-0.146871	0.24827	0.0995088	0.428454
AMER2	13.2651	-0.0319943	0.210913	0.125624	0.471909
AMER3	243.424	-0.00236409	0.208198	0.0328962	0.270369
AMFR	6514.76	0.0143227	0.191646	0.850008	0.953985
AMH	373.277	-0.0331908	0.20922	0.180706	0.546722
AMICA1	1470.9	0.107786	0.24405	0.0196035	0.218808
AMIGO1	248.506	0.00762849	0.186052	0.930176	0.980809
AMIGO2	683.637	0.756099	0.555746	0.00413091	0.104261
AMIGO3	324.732	-0.230516	0.260465	0.0753734	0.386522
AMMECR1	662.609	-0.0422139	0.178287	0.65794	0.875033
AMMECR1L	1048.19	-0.139002	0.173532	0.224502	0.594371
AMN	137.321	-1.64712	0.892883	0.000702789	0.0460391
AMN1	490.628	0.0112694	0.183455	0.904468	0.972117
AMOT	3077.55	-0.0717591	0.198637	0.397605	0.735632
AMOTL1	4825.98	-0.00827812	0.1766	0.923072	0.979095
AMOTL2	2695.32	-0.176828	0.247236	0.113065	0.45222
AMPD1	103.826	-0.0102377	0.205029	0.716137	0.90225
AMPD2	3731.28	-0.0497349	0.174568	0.611706	0.854062
AMPD3	2903.1	0.141712	0.242343	0.127598	0.474246
AMPH	205.02	0.221465	0.326081	0.047776	0.316483
AMT	983.083	-0.0169892	0.191471	0.811829	0.9418
AMTN	16.2837	-0.00296524	0.208155	0.784507	0.931088
AMY2A	32.6848	0.0113018	0.203885	0.769207	0.925855
AMY2B	2101.93	0.120827	0.210844	0.233146	0.601435
AMZ1	164.761	0.0223425	0.204375	0.570045	0.836268
AMZ2	3274.28	0.128475	0.198464	0.24042	0.60848
AMZ2P1	320.287	0.334222	0.282198	0.0306194	0.263046
ANAPC1	7965.71	-0.0773813	0.161866	0.466338	0.779754
ANAPC10	811.322	0.052374	0.157035	0.614622	0.855475
ANAPC11	1263.87	-0.647197	0.425482	0.00471099	0.110201
ANAPC13	789.399	-0.0217055	0.149821	0.835502	0.949706
ANAPC15	505.4	-0.167457	0.252114	0.113275	0.452456
ANAPC16	1266.81	0.0962648	0.174822	0.375394	0.720346
ANAPC1P1	190.846	0.23694	0.276583	0.0693516	0.371044
ANAPC2	3894.08	-0.0263075	0.159025	0.790919	0.933245
ANAPC4	3100.14	0.371805	0.225078	0.01424	0.188628
ANAPC5	6362.56	0.0148147	0.167956	0.883977	0.965836
ANAPC7	3399.57	-0.00959702	0.174912	0.915907	0.976509
ANG	1551.42	-0.0131046	0.203304	0.72798	0.907268
ANGEL1	1233.68	-0.00161946	0.179536	0.986697	0.997598
ANGEL2	2832.94	-0.00525858	0.166029	0.962155	0.991208
ANGPT1	471.865	0.685628	0.485026	0.00502973	0.114119
ANGPT2	543.04	0.124068	0.240831	0.109822	0.446981
ANGPT4	14.8568	0.10788	0.245767	0.0175906	0.208082
ANGPTL1	581.739	0.0221907	0.20488	0.569991	0.836256
ANGPTL2	4370.87	0.103792	0.224707	0.170998	0.533611
ANGPTL3	4145.29	-0.00116574	0.208248	0.0755832	0.387289
ANGPTL4	552.168	-0.108824	0.239895	0.0558461	0.337493
ANGPTL5	35.9402	0.0281522	0.209059	0.183135	0.548927
ANGPTL6	220.917	0.00828855	0.202705	0.847835	0.953516
ANK1	429.045	0.037808	0.204382	0.470744	0.782638
ANK2	2689.8	0.122049	0.250313	0.0419463	0.298409
ANK3	8768.4	-0.0205837	0.196722	0.738045	0.911676
ANKAR	1483.27	0.443645	0.337663	0.0139655	0.187096
ANKDD1A	273.598	0.282731	0.364401	0.0391651	0.290565
ANKDD1B	101.065	0.106707	0.220797	0.20712	0.577978
ANKEF1	723.093	-0.251615	0.38249	0.029096	0.257322
ANKFN1	23.8584	0.151477	0.289042	0.00895754	0.154126
ANKFY1	4774.04	0.0971594	0.176559	0.366752	0.713733
ANKH	4245.32	-0.0337195	0.200901	0.555744	0.828032
ANKHD1	223.196	0.0640601	0.162618	0.545692	0.823405
ANKHD1-EIF4EBP3	45.194	0.0972846	0.219749	0.216622	0.588426
ANKIB1	10059.5	-0.0844299	0.202211	0.337972	0.691965
ANKK1	36.5273	0.135563	0.2398	0.141335	0.494589
ANKLE1	174.554	-0.0170405	0.178765	0.850149	0.954055
ANKLE2	5913.71	-0.0322347	0.172653	0.745999	0.915819
ANKMY1	2423.94	0.0221883	0.175638	0.826431	0.947544
ANKMY2	1629.62	0.371467	0.177916	0.00621063	0.129314
ANKRA2	1136.59	0.178075	0.250127	0.115164	0.454385
ANKRD1	35.4454	-0.100882	0.232387	0.110762	0.448149
ANKRD10	7623.3	0.177779	0.183589	0.139711	0.49149
ANKRD11	17239.7	0.0971754	0.178064	0.369116	0.715245
ANKRD12	15823.9	0.484018	0.405831	0.0118749	0.173079
ANKRD13A	3260.54	0.184887	0.267557	0.0881482	0.409593
ANKRD13B	1812.72	-0.0656856	0.215983	0.15674	0.516566
ANKRD13C	2516.03	0.0978469	0.167865	0.364854	0.71258
ANKRD13D	4271.54	0.0222653	0.173059	0.81729	0.943812
ANKRD16	593.161	-0.143741	0.2183	0.181121	0.546731
ANKRD17	29761.7	-0.067507	0.195287	0.435057	0.758801
ANKRD18A	930.73	-0.0167927	0.205126	0.646156	0.869121
ANKRD18B	51.7496	-0.00746529	0.204005	0.836365	0.950126
ANKRD19P	20.0106	-0.0566116	0.206714	0.378759	0.722328
ANKRD2	14.0428	0.000261964	0.196235	0.998582	0.999825
ANKRD20A11P	77.3324	0.0472173	0.193949	0.562774	0.831968
ANKRD20A5P	278.096	0.0412641	0.199814	0.513195	0.803512
ANKRD20A8P	128.921	-0.0116789	0.204544	0.755667	0.919448
ANKRD22	260.227	0.165194	0.291471	0.0289591	0.256825
ANKRD23	540.787	-0.0936596	0.20588	0.304719	0.665564
ANKRD24	324.342	-0.0214675	0.19605	0.739812	0.912297
ANKRD26	4654.95	-0.212908	0.171176	0.0804906	0.39651
ANKRD27	4977.66	-0.0375456	0.200952	0.532578	0.815642
ANKRD28	5017.83	-0.0708912	0.173085	0.495509	0.795678
ANKRD29	344.867	0.141614	0.259632	0.0660815	0.363145
ANKRD30A	9478	0.110324	0.238965	0.103186	0.436362
ANKRD30B	326.977	-0.149659	0.284754	0.0123248	0.176635
ANKRD31	193.448	-0.0185095	0.201286	0.719369	0.903474
ANKRD32	1861.9	0.197748	0.263083	0.091622	0.414925
ANKRD33B	266.206	0.0471381	0.198452	0.520001	0.808044
ANKRD34A	154.965	0.0147337	0.199178	0.790791	0.933245
ANKRD34B	22.7542	0.00726858	0.204959	0.832493	0.94848
ANKRD35	69.7086	0.101926	0.228104	0.148047	0.504554
ANKRD36	16472.7	0.0441927	0.171616	0.660016	0.875825
ANKRD36B	8564.01	0.0346324	0.180161	0.70902	0.899134
ANKRD36C	15438.6	0.0875505	0.176861	0.408631	0.743052
ANKRD37	277.813	0.0989002	0.209539	0.273435	0.638073
ANKRD39	390.868	-0.104248	0.196356	0.306511	0.667629
ANKRD40	2447.79	0.0359962	0.163639	0.729358	0.908168
ANKRD42	898.898	0.116048	0.203291	0.261692	0.627185
ANKRD44	5833.33	0.693083	0.598762	0.00557953	0.122203
ANKRD45	37.2778	-0.0601052	0.21261	0.236981	0.605389
ANKRD46	642.375	-0.230783	0.23121	0.0782035	0.391728
ANKRD49	648.959	0.186507	0.252004	0.104389	0.438253
ANKRD50	5457.91	-0.000755211	0.184339	0.990101	0.998581
ANKRD52	3315.63	-0.017687	0.15935	0.879148	0.964312
ANKRD53	111.432	0.071927	0.204977	0.358664	0.708002
ANKRD54	452.954	-0.25631	0.244099	0.0603283	0.348673
ANKRD55	58.2801	0.0454608	0.210457	0.249326	0.61571
ANKRD6	1068.21	0.215286	0.230344	0.0922311	0.416075
ANKRD61	14.5074	-0.0806639	0.216435	0.246089	0.613434
ANKRD62	52.5338	0.00816561	0.200322	0.87719	0.96362
ANKRD62P1-PARP4P3	12.6006	-0.01126	0.206944	0.690294	0.891189
ANKRD65	162.501	1.19599	0.352825	2.85019e-05	0.00815019
ANKRD7	41.2384	-0.0912121	0.232326	0.0421757	0.298544
ANKRD9	583.991	-0.183661	0.303166	0.0387229	0.289218
ANKS1A	5434.99	-0.041231	0.164338	0.685069	0.888388
ANKS1B	2627.14	-0.0396657	0.208656	0.287903	0.649636
ANKS3	1029.61	-0.0605319	0.168737	0.562169	0.831662
ANKS4B	87.2789	0.00494115	0.208263	0.639559	0.866398
ANKS6	839.605	-0.0132785	0.195482	0.841766	0.9519
ANKZF1	2021.14	0.0872168	0.145059	0.424792	0.752693
ANLN	6726.99	-1.55596	0.606433	0.000124219	0.0176205
ANO1	7260.39	-0.158023	0.277134	0.0430273	0.30208
ANO10	2047.96	-0.0110293	0.155018	0.908999	0.973812
ANO2	489.652	0.158396	0.26155	0.0878585	0.409427
ANO3	83.9606	0.0158242	0.205495	0.61792	0.857109
ANO4	74.5167	-0.0844836	0.228531	0.0341928	0.274747
ANO5	387.384	-0.0744862	0.220689	0.112905	0.452141
ANO6	7628.05	0.0781298	0.185299	0.434613	0.758669
ANO7	451.34	-0.0355983	0.200161	0.544494	0.822493
ANO8	3576.18	-0.12264	0.221273	0.19547	0.565027
ANO9	2972.52	-0.0121769	0.196369	0.830315	0.947553
ANP32A	6987.8	-0.0370514	0.17525	0.696625	0.893206
ANP32B	7258.95	-0.0831253	0.188535	0.406336	0.741964
ANP32C	126.155	0.0437313	0.194613	0.583309	0.84099
ANP32D	21.3722	0.0538055	0.204106	0.429581	0.755818
ANP32E	3427.74	-0.144669	0.210788	0.190401	0.557825
ANPEP	17487.7	-0.0508212	0.211657	0.208434	0.578618
ANTXR1	7480.53	0.0900687	0.222581	0.170654	0.533192
ANTXR2	1769.67	0.50603	0.454223	0.0110795	0.167307
ANTXRL	435.034	0.000526944	0.203522	0.985335	0.99718
ANXA1	8532.83	0.0299676	0.200675	0.602354	0.849602
ANXA10	162.235	-0.00100114	0.208249	0.11015	0.44743
ANXA11	10237.3	0.0431737	0.180155	0.649112	0.87007
ANXA13	16.2426	-0.0253039	0.207829	0.391533	0.730929
ANXA2	22725.9	0.000314028	0.188889	0.999622	0.999872
ANXA2P1	126.078	0.0524751	0.195396	0.511877	0.802775
ANXA2P2	1824.69	0.101097	0.208188	0.27831	0.640752
ANXA2R	242.804	1.08246	0.494534	0.000726248	0.0469773
ANXA3	1894.2	-0.0409906	0.204582	0.438222	0.76173
ANXA4	3163.07	-0.0511211	0.192931	0.532131	0.815412
ANXA5	14387.8	0.139527	0.21439	0.192072	0.559895
ANXA6	9925.35	0.0524072	0.167498	0.612579	0.854629
ANXA7	5304.18	0.0279191	0.15658	0.796012	0.934863
ANXA8	22.7037	-0.0396147	0.208279	0.383839	0.725325
ANXA8L1	58.4213	-0.0453921	0.20572	0.431188	0.756654
ANXA8L2	109.044	-0.0629042	0.214463	0.212333	0.582987
ANXA9	829.031	-0.0289372	0.207813	0.312868	0.673555
AOAH	3385.8	0.0915307	0.229122	0.0779607	0.391106
AOC1	144.076	-0.0441197	0.212029	0.128625	0.475732
AOC2	404.624	-0.21441	0.247263	0.0893412	0.411407
AOC3	2204.15	0.0479769	0.191022	0.566824	0.834873
AOC4P	165.394	-0.0112591	0.203406	0.777089	0.928246
AOX1	18878.7	0.000991385	0.205615	0.980981	0.996147
AP1AR	1383.46	-0.0421111	0.154881	0.690256	0.891189
AP1B1	10926	0.0758466	0.178789	0.471107	0.782933
AP1G1	6039.64	0.0579292	0.168197	0.576303	0.838503
AP1G2	4903.8	0.0578572	0.180129	0.55464	0.827386
AP1M1	3528.82	0.0167087	0.181846	0.844814	0.952375
AP1M2	2159.47	-0.032453	0.209221	0.191709	0.559384
AP1S1	1515.39	-0.905432	0.485973	0.00162371	0.0681918
AP1S2	1735.65	0.295792	0.429658	0.0274557	0.252146
AP1S3	261.333	-0.0459644	0.190808	0.583017	0.84099
AP2A1	10226.2	-0.0683803	0.132943	0.515912	0.80526
AP2A2	10498	0.0823425	0.158335	0.44631	0.76653
AP2B1	12471.8	-0.0120954	0.161937	0.881734	0.965208
AP2M1	10282.7	-0.152141	0.158992	0.189764	0.557457
AP2S1	2679.02	-0.204499	0.179538	0.0951779	0.420871
AP3B1	7964.31	0.196054	0.155731	0.093022	0.417279
AP3B2	489.348	-0.0168245	0.205556	0.596976	0.847609
AP3D1	13728.8	-0.0445259	0.162068	0.663911	0.877824
AP3M1	3875.95	0.0311498	0.147716	0.753103	0.918561
AP3M2	1490	-0.079548	0.209342	0.29403	0.656619
AP3S1	2737.84	0.138223	0.215776	0.190874	0.5583
AP3S2	76.036	0.0492892	0.182984	0.601239	0.849079
AP4B1	1580	0.158669	0.242353	0.128617	0.475732
AP4E1	1795.06	0.295909	0.216532	0.0350577	0.276638
AP4M1	1288	-0.0823579	0.217669	0.196604	0.56651
AP4S1	290.295	0.148211	0.229889	0.159287	0.519469
AP5B1	1470.88	0.0217715	0.184453	0.799845	0.936684
AP5M1	2644.09	0.0488018	0.170654	0.643939	0.867888
AP5S1	453.709	0.0477698	0.163	0.649897	0.87044
AP5Z1	2303.33	0.0955308	0.184401	0.362623	0.710542
APAF1	3344.66	0.29315	0.219921	0.038631	0.289201
APBA1	826.869	-0.00242541	0.195926	0.964065	0.991519
APBA2	1449.08	-0.0150363	0.189487	0.882071	0.965381
APBA3	1476.95	0.0283265	0.137213	0.786279	0.932427
APBB1	1233.52	0.177024	0.260108	0.0991909	0.427682
APBB1IP	4274.25	0.0734368	0.218839	0.149128	0.505465
APBB2	8829.82	0.0683601	0.186068	0.478882	0.787823
APBB3	1543.14	-0.104452	0.161105	0.341449	0.694503
APC	53545.9	0.177214	0.194691	0.143074	0.49661
APC2	92.0569	-0.0208133	0.202472	0.6593	0.875639
APCDD1	1589.12	-0.0531082	0.189689	0.538684	0.818921
APCDD1L	47.634	0.0085248	0.206135	0.718155	0.903228
APCS	3697.2	-0.00410415	0.208323	0.775441	0.927493
APEH	3941	-0.214398	0.226806	0.0946536	0.419929
APEX1	8182.87	-0.111667	0.153647	0.303109	0.664501
APEX2	1761.32	0.0629909	0.153456	0.561847	0.831626
APH1A	4329.23	-0.0871689	0.185217	0.390727	0.730181
APH1B	842.969	0.58316	0.278298	0.00248601	0.0826301
API5	8471.6	0.0274202	0.139766	0.807992	0.940121
APIP	1504.37	-0.0136918	0.16291	0.886994	0.966036
APLF	791.406	0.256054	0.234097	0.0604652	0.349016
APLN	76.6324	-0.109309	0.233547	0.120213	0.463862
APLNR	829.505	-0.0860494	0.217592	0.204008	0.573983
APLP1	332.258	-0.0353439	0.205708	0.436017	0.759877
APLP2	18227.4	-0.0678408	0.206589	0.33769	0.691965
APMAP	3525.98	-0.108832	0.196437	0.289144	0.651361
APOA1	13773.5	0.00139892	0.20686	0.922735	0.979009
APOA1BP	2651	-0.509261	0.579828	0.010905	0.166116
APOA2	11482.4	-0.00933337	0.208519	0.491104	0.794272
APOA4	213.23	-0.000507259	0.208157	0.983838	0.996641
APOA5	1930.45	-0.00409403	0.208324	0.774811	0.927351
APOB	222447	0.0145551	0.207556	0.42386	0.752004
APOBEC3A	156.53	-0.0753825	0.214027	0.238621	0.60717
APOBEC3B	1916.75	-0.293875	0.457384	0.0214634	0.227985
APOBEC3C	1808.12	0.185422	0.30825	0.0355203	0.278081
APOBEC3D	1643.19	0.866349	0.552367	0.00256731	0.0834839
APOBEC3F	2202.95	0.190555	0.273808	0.0845907	0.404325
APOBEC3G	2497.02	0.1921	0.328724	0.0186203	0.213508
APOBEC3H	154.595	0.152086	0.26253	0.0779035	0.390928
APOBR	762.239	0.058454	0.203696	0.398076	0.736051
APOC1	17344.4	0.0149706	0.206871	0.52432	0.810644
APOC1P1	149.007	0.0164279	0.207633	0.417015	0.746771
APOC3	16363.1	-0.00362039	0.208262	0.385748	0.7269
APOD	2234.24	0.0595118	0.212037	0.24449	0.611819
APOE	46409.3	0.0155748	0.205103	0.645685	0.869121
APOF	475.588	-0.00909436	0.208501	0.49988	0.796722
APOH	18399.8	-0.00751237	0.208112	0.622822	0.859583
APOL1	3042.11	0.0153886	0.1961	0.798565	0.93605
APOL2	3478.75	0.0350815	0.198907	0.566038	0.834386
APOL3	2822.29	0.0752137	0.215723	0.214237	0.585154
APOL4	781.058	0.0696072	0.217976	0.129858	0.477133
APOL6	2781.64	0.0148134	0.200071	0.776413	0.927956
APOLD1	384.544	-0.111793	0.232944	0.12517	0.471909
APOM	409.525	-0.0176332	0.205447	0.602616	0.849663
APOO	459.194	-0.585226	0.318803	0.00397981	0.101856
APOOL	1402.95	-0.081317	0.180828	0.429041	0.755655
APOPT1	1014.49	-0.000789551	0.165279	0.989192	0.998
APP	28318.7	-0.288117	0.361899	0.0364859	0.280632
APPBP2	2743.05	0.201607	0.172271	0.0951718	0.420871
APPL1	6057.51	0.0515791	0.149001	0.625454	0.861039
APPL2	2730.37	0.515763	0.272877	0.00467993	0.110201
APRT	1261.9	0.0291925	0.148893	0.77957	0.929423
APTR	36.4737	0.0598577	0.191204	0.508933	0.800824
APTX	1294.91	-0.283909	0.185485	0.0307105	0.263202
AQP1	3672.92	0.100986	0.217717	0.221989	0.593875
AQP11	164.341	-0.101563	0.2334	0.0869607	0.40765
AQP3	2728.61	0.0179254	0.199023	0.752235	0.918554
AQP4	214.134	-0.00673486	0.206491	0.735511	0.910543
AQP5	369.458	-0.173425	0.307257	0.019983	0.220601
AQP6	23.344	-0.0762657	0.225331	0.0405097	0.293363
AQP7	296.467	0.0110434	0.205834	0.685006	0.888388
AQP9	1696.34	-0.0278625	0.208396	0.253491	0.620816
AQPEP	40.6796	0.037587	0.194326	0.623843	0.85984
AQR	6078.13	0.077371	0.147494	0.459421	0.775241
AR	16575.3	-0.0169387	0.201608	0.71809	0.903228
ARAF	23254.3	-0.0214992	0.174493	0.816226	0.943309
ARAP1	14567.5	0.145328	0.227797	0.164525	0.525766
ARAP2	7089.58	0.135283	0.240051	0.128225	0.475677
ARAP3	2078.97	0.0463412	0.181975	0.59538	0.847153
ARCN1	7160.47	-0.055286	0.166177	0.590534	0.844792
AREG	200.539	-0.0260328	0.20703	0.365626	0.713077
AREL1	2967.81	0.0369774	0.134617	0.71817	0.903228
ARF1	13206.1	-0.188077	0.264924	0.0903685	0.412149
ARF3	2771.96	0.0161004	0.154636	0.865069	0.960151
ARF4	5135.07	-0.116129	0.176533	0.303823	0.665131
ARF5	3514.21	-0.326201	0.262855	0.030543	0.262587
ARF6	6451.81	0.0289961	0.167508	0.774759	0.927351
ARFGAP1	3755.01	0.0280498	0.176391	0.775247	0.927424
ARFGAP2	3291.58	0.0312773	0.134523	0.750992	0.9181
ARFGAP3	2920.36	-0.0878087	0.182585	0.395961	0.734422
ARFGEF1	20558.5	0.0434574	0.166932	0.672127	0.88228
ARFGEF2	13200.3	0.119406	0.164038	0.297554	0.659502
ARFIP1	2101.18	0.0322436	0.158784	0.756599	0.920022
ARFIP2	1518.76	-0.0975206	0.198621	0.317703	0.677087
ARFRP1	2699.58	-0.0720644	0.164592	0.489204	0.793536
ARG1	3229.67	0.0129121	0.208534	0.12457	0.470961
ARG2	251.214	-0.266247	0.382234	0.0330376	0.270903
ARGLU1	5273.24	0.136427	0.20258	0.219063	0.591608
ARHGAP1	5609.05	0.134165	0.184559	0.233877	0.602503
ARHGAP10	2432.75	0.511992	0.524162	0.0112136	0.16819
ARHGAP11A	3206.11	-0.953243	0.461437	0.00106966	0.057351
ARHGAP11B	1183.7	-0.92023	0.277365	4.40912e-05	0.0103156
ARHGAP12	6613.2	0.0384576	0.18768	0.700142	0.895325
ARHGAP15	2966.32	0.169868	0.30338	0.0155159	0.196588
ARHGAP17	6027.8	0.178325	0.249385	0.110248	0.44763
ARHGAP18	3946.86	0.382029	0.318897	0.0203389	0.222116
ARHGAP19	39.0763	0.0463018	0.201227	0.497951	0.795997
ARHGAP20	362.971	0.0593768	0.212134	0.260986	0.626725
ARHGAP21	16940.3	-0.0515768	0.194595	0.518966	0.807456
ARHGAP22	858.222	0.288377	0.290626	0.045388	0.308918
ARHGAP23	3422.01	0.152539	0.20578	0.178403	0.543997
ARHGAP24	1574.4	0.0900589	0.201659	0.330698	0.687062
ARHGAP25	2843.67	0.441769	1.20789	0.00733511	0.138713
ARHGAP26	4902.91	0.0513847	0.187863	0.532942	0.815713
ARHGAP27	2668.97	0.154736	0.219325	0.169722	0.531973
ARHGAP28	904.982	0.0565673	0.209774	0.293323	0.656012
ARHGAP29	9508.94	0.0206784	0.18274	0.814429	0.942527
ARHGAP30	7055.85	0.121755	0.247508	0.0595726	0.347117
ARHGAP31	5375.47	0.194467	0.248505	0.103579	0.436836
ARHGAP32	5681.86	-0.269359	0.419736	0.0231796	0.23659
ARHGAP33	2984.18	-0.238579	0.35943	0.0354615	0.277877
ARHGAP35	14605.5	-0.0981362	0.170144	0.353989	0.704551
ARHGAP39	1634.35	-0.126262	0.255255	0.0319149	0.266797
ARHGAP4	5743.81	0.195887	0.308197	0.0451866	0.308918
ARHGAP40	447.952	-0.0167517	0.206926	0.383177	0.724722
ARHGAP42	1404.7	0.0508594	0.199549	0.484139	0.791396
ARHGAP44	896.348	-0.00304182	0.192269	0.962403	0.991208
ARHGAP5	14420.3	0.101377	0.204337	0.292127	0.655214
ARHGAP6	844.437	0.239455	0.39911	0.0184794	0.213263
ARHGAP8	21.3861	-0.0712069	0.222907	0.0315111	0.265268
ARHGAP9	2136.51	0.118317	0.24542	0.0585084	0.34461
ARHGDIA	11702.4	-0.0939282	0.190699	0.351917	0.703015
ARHGDIB	5975.44	0.18352	0.298519	0.0415122	0.297171
ARHGDIG	48.9308	-0.00901264	0.206203	0.741773	0.91342
ARHGEF1	11315.8	0.508998	0.243056	0.00328083	0.0940125
ARHGEF10	5643.66	-0.00248513	0.19055	0.972444	0.994867
ARHGEF10L	7354.5	-0.0741828	0.179048	0.498727	0.796281
ARHGEF11	7410.48	-0.0523963	0.178423	0.587009	0.843299
ARHGEF12	17480.1	-0.0903218	0.18479	0.379356	0.722574
ARHGEF15	1320.19	0.0933422	0.200714	0.325244	0.682898
ARHGEF16	1407.51	-0.086903	0.231503	0.00949451	0.158521
ARHGEF17	8253.55	0.0232465	0.192187	0.756153	0.919667
ARHGEF18	5319.34	0.19383	0.237053	0.109976	0.447133
ARHGEF19	1905.32	-0.108604	0.24104	0.0432814	0.302684
ARHGEF2	12205.2	0.129806	0.161065	0.250531	0.617164
ARHGEF25	1227.48	0.341505	0.314719	0.0296011	0.258876
ARHGEF26	3165.51	-0.15145	0.271861	0.0462328	0.311098
ARHGEF28	2121.86	-0.971066	0.477554	0.00108153	0.0576305
ARHGEF3	2565.11	0.611723	0.298677	0.00251538	0.0831549
ARHGEF33	116.438	0.0328596	0.192679	0.670012	0.881298
ARHGEF34P	1590.74	-0.0595205	0.210052	0.276668	0.640309
ARHGEF35	869.016	-0.0471017	0.208021	0.310538	0.671641
ARHGEF37	1632.35	-0.0869584	0.223061	0.134716	0.483959
ARHGEF38	486.807	-0.0104432	0.205045	0.722132	0.904736
ARHGEF39	344.851	-0.980871	0.54939	0.00164606	0.0681918
ARHGEF4	894.671	-0.154001	0.29336	0.00362118	0.0989917
ARHGEF40	6182.47	0.042366	0.19258	0.597519	0.847609
ARHGEF5	2995.51	-0.0516983	0.208845	0.313443	0.674472
ARHGEF6	5166.05	0.169334	0.277923	0.0587664	0.345183
ARHGEF7	6805.06	0.022721	0.160588	0.847019	0.952976
ARHGEF9	2010.14	-0.0121054	0.177799	0.893042	0.968023
ARID1A	106655	-0.0609637	0.144153	0.57031	0.836367
ARID1B	18943.2	0.0468754	0.143926	0.664597	0.878409
ARID2	11037	0.0184307	0.17497	0.849142	0.953697
ARID3A	1433.97	0.183092	0.232385	0.122956	0.468242
ARID3B	841.765	0.176868	0.199215	0.143523	0.496937
ARID3C	108.601	-0.0990008	0.241779	0.00135224	0.0639386
ARID4A	3987.8	0.106621	0.205778	0.275298	0.639027
ARID4B	11441.4	0.019377	0.17104	0.845564	0.952528
ARID5A	2923.04	0.148373	0.250395	0.108223	0.444378
ARID5B	6541.61	0.217766	0.288199	0.0692649	0.37093
ARIH1	5428.17	-0.0254162	0.158125	0.785436	0.931816
ARIH2	3589.71	-0.124349	0.153574	0.255311	0.622611
ARIH2OS	46.3418	-0.0172936	0.181285	0.843461	0.951962
ARL1	3994.31	-0.109055	0.198718	0.276557	0.640218
ARL10	287.454	0.102118	0.22016	0.209152	0.579405
ARL11	152.909	0.432262	0.644431	0.0139989	0.187096
ARL13B	1150.67	0.127218	0.157063	0.252521	0.619608
ARL14EP	1670.81	0.243609	0.201354	0.0671843	0.366493
ARL15	605.634	0.566143	0.6124	0.00899755	0.154333
ARL16	408.763	-0.124663	0.221672	0.193645	0.561944
ARL17A	1103.52	0.190043	0.219517	0.12131	0.465907
ARL17B	48.6891	0.181262	0.277057	0.0822353	0.400289
ARL2	1129.42	0.0867078	0.176932	0.41277	0.744563
ARL2BP	1389.01	0.16327	0.230076	0.144428	0.498253
ARL3	1339.78	-0.0219104	0.173651	0.81619	0.943309
ARL4A	517.796	0.174651	0.238801	0.129635	0.477113
ARL4C	2382.39	0.669596	0.388797	0.00364955	0.0994055
ARL4D	162.509	-0.0562942	0.210425	0.274092	0.638566
ARL5A	2554.22	0.160669	0.19935	0.171406	0.53442
ARL5B	1632.96	-0.357526	0.314375	0.0256059	0.245106
ARL6	411.55	0.00952854	0.175519	0.919168	0.977643
ARL6IP1	5423.83	-0.588475	0.29164	0.00279308	0.0870541
ARL6IP4	3175.36	-0.0249357	0.171244	0.800913	0.937094
ARL6IP5	4556.17	0.173096	0.234461	0.131225	0.478852
ARL6IP6	1572.96	0.0339012	0.150277	0.748534	0.916729
ARL8A	3038.78	-0.139708	0.182709	0.221906	0.593875
ARL8B	2547.3	0.0777517	0.179039	0.449219	0.76904
ARL9	47.6943	-0.0212695	0.203306	0.627421	0.861604
ARMC1	2310.41	-0.12648	0.185587	0.259894	0.625786
ARMC10	2862.69	-0.0829128	0.212232	0.226742	0.596507
ARMC12	100.87	-0.0355569	0.198114	0.593701	0.846901
ARMC2	756.431	0.554493	0.36549	0.00689945	0.13439
ARMC3	66.2337	-0.0104081	0.206815	0.580557	0.840396
ARMC4	70.7895	-0.0348026	0.206952	0.379519	0.722655
ARMC5	801.289	0.0501672	0.180931	0.597726	0.847609
ARMC6	1896.6	-0.827127	0.254432	6.35676e-05	0.0116854
ARMC7	410.939	0.0590269	0.165826	0.559705	0.830635
ARMC8	4328.9	-0.0468659	0.147268	0.644921	0.868543
ARMC9	1571.16	-0.00539021	0.193512	0.898685	0.969856
ARMCX1	1077.4	0.318276	0.315023	0.0333127	0.272043
ARMCX2	1512.72	0.108947	0.205321	0.271713	0.636114
ARMCX3	3186.78	0.0413407	0.167023	0.685116	0.888388
ARMCX4	1109.92	-0.0470207	0.171244	0.63289	0.86394
ARMCX5	708.785	0.0882893	0.156432	0.416136	0.746237
ARMCX5-GPRASP2	44.9938	0.0032675	0.184275	0.97161	0.99467
ARMCX6	640.869	-0.0202927	0.162571	0.843688	0.951962
ARNT	4746.97	-0.0316601	0.14521	0.759674	0.921785
ARNT2	1946.34	-0.0303996	0.205624	0.443607	0.764826
ARNTL	1867.54	0.13357	0.216148	0.203592	0.57308
ARNTL2	1295.49	-0.0336381	0.194657	0.597311	0.847609
ARPC1A	8606.61	-0.220539	0.330285	0.0421482	0.298505
ARPC1B	13876.9	0.113028	0.211193	0.233774	0.602408
ARPC2	13438.5	0.224479	0.233401	0.084512	0.404271
ARPC3	4418.48	0.246855	0.26161	0.0598497	0.347117
ARPC4	1294.27	0.254777	0.265475	0.0609815	0.350189
ARPC5	5304.92	0.120478	0.181141	0.280013	0.642277
ARPC5L	941.357	-0.132805	0.151011	0.226863	0.596578
ARPP19	2892.47	-0.0372969	0.16318	0.723027	0.905229
ARPP21	39.8651	-0.0239543	0.209105	0.116686	0.457307
ARRB1	3199.92	0.555359	0.263301	0.00283128	0.0877711
ARRB2	5664.22	0.139076	0.250465	0.0944231	0.41952
ARRDC1	3032.78	0.0662603	0.185171	0.491797	0.794272
ARRDC2	1460.09	0.123114	0.202284	0.24856	0.61512
ARRDC3	4702.11	-0.000240506	0.193203	0.990691	0.998699
ARRDC4	1059.6	0.111377	0.208416	0.257535	0.62451
ARRDC5	289.11	0.0819171	0.226152	0.0605036	0.349126
ARSA	3385.8	-0.0648447	0.172215	0.526036	0.811764
ARSB	1387.47	0.0437518	0.200399	0.507035	0.799706
ARSD	2461.81	-0.0655458	0.205427	0.35678	0.706973
ARSE	878.674	-0.06401	0.22088	0.00164634	0.0681918
ARSG	992.501	0.0157351	0.19358	0.855064	0.956144
ARSI	351.155	-0.00785905	0.197341	0.891601	0.967485
ARSJ	316.485	0.0480559	0.173623	0.627978	0.861814
ARSK	420.073	0.0840005	0.160337	0.437391	0.761094
ART1	33.2406	0.0382097	0.21093	0.210719	0.581253
ART3	1112.19	-0.0270502	0.209133	0.158342	0.518529
ART4	280.168	0.040432	0.209366	0.277038	0.640476
ART5	16.8758	0.0414817	0.205068	0.456976	0.773942
ARTN	155.339	-0.0422137	0.208748	0.288034	0.649754
ARV1	1306.55	-0.075567	0.193388	0.416821	0.746657
ARVCF	2147.96	-0.113261	0.231067	0.141883	0.495353
ARX	38.3894	0.00759685	0.20716	0.656507	0.874311
ASAH1	19019.8	0.0759123	0.203787	0.394871	0.733738
ASAH2	78.0856	-0.0645235	0.212179	0.269845	0.634877
ASAH2B	153.495	-0.268721	0.301384	0.0520385	0.328018
ASAP1	10655.4	0.308653	0.229109	0.0335111	0.272675
ASAP2	5112.16	-0.0624798	0.201259	0.410973	0.743649
ASAP3	2703.13	-0.0312159	0.198204	0.617712	0.857109
ASB1	670.171	0.131644	0.166692	0.242542	0.61085
ASB12	12.1357	-0.0670202	0.215533	0.228526	0.598086
ASB13	1025.62	-0.0390799	0.200724	0.482859	0.790217
ASB14	25.6079	0.034606	0.206923	0.41325	0.744563
ASB16	135.804	-0.029526	0.206372	0.433006	0.758077
ASB16-AS1	537.561	0.00475513	0.164139	0.964358	0.991547
ASB2	369.32	0.909147	0.700996	0.00299737	0.0902971
ASB3	129.03	0.19873	0.203133	0.112667	0.451645
ASB4	23.3231	-3.06874	0.736586	1.16344e-06	0.000806127
ASB5	26.7668	-0.0303047	0.210891	0.0543526	0.333843
ASB6	1384.41	-0.0103202	0.161055	0.916796	0.976926
ASB7	981.083	-0.0589936	0.164815	0.57135	0.836854
ASB8	738.58	0.17813	0.230456	0.130599	0.478474
ASB9	192.13	-0.122929	0.255312	0.0212663	0.227367
ASCC1	1489.54	0.043234	0.159461	0.676933	0.884142
ASCC2	3674.5	-0.0654849	0.136349	0.521884	0.809379
ASCC3	10443.4	0.0169068	0.171928	0.86142	0.958904
ASCL1	83.9019	-2.78311	1.02094	3.34909e-05	0.00914151
ASCL2	52.5759	0.446423	0.994184	0.0108209	0.165715
ASF1A	1223.53	0.00769318	0.186896	0.927124	0.97995
ASF1B	840.059	-1.15485	0.684024	0.00119165	0.0607237
ASGR1	2472.07	-0.0162415	0.20594	0.580997	0.840426
ASGR2	1695.4	0.00777733	0.205699	0.790241	0.933245
ASH1L	26949.5	-0.0498572	0.172899	0.614378	0.855218
ASH1L-AS1	295.467	-0.0682294	0.198572	0.41096	0.743649
ASH2L	4432.02	-0.106355	0.219432	0.207928	0.578417
ASIC1	334.679	0.0354724	0.205225	0.496173	0.795997
ASIC2	54.1316	-0.0257561	0.206457	0.460752	0.775888
ASIC3	572.083	-0.108019	0.236992	0.0766925	0.388582
ASIC4	50.4263	-0.000101127	0.199731	0.994761	0.999261
ASIP	12.3167	0.0611497	0.213933	0.228504	0.598086
ASL	4139.48	-0.140446	0.258099	0.0620286	0.352507
ASMTL	3055.48	0.0376368	0.169463	0.709497	0.899407
ASMTL-AS1	328.757	-0.043009	0.174943	0.657692	0.874996
ASNA1	2797.38	-0.119906	0.167702	0.285237	0.647566
ASNS	3538.91	-0.0718043	0.215843	0.200758	0.57099
ASNSD1	2578.05	0.169743	0.18131	0.156281	0.516207
ASPA	185.594	0.0261193	0.203778	0.567208	0.835072
ASPDH	215.617	-0.0113857	0.206486	0.657933	0.875033
ASPG	498.453	-0.0380124	0.20923	0.274965	0.638831
ASPH	7852.24	-0.0491523	0.198857	0.485983	0.792017
ASPHD1	191.432	-0.0303089	0.20888	0.190087	0.557457
ASPHD2	357.905	0.174697	0.268316	0.0852533	0.405591
ASPM	15761.5	-1.12738	0.922254	0.00173219	0.0697505
ASPN	5441.76	0.159633	0.272302	0.0615488	0.351331
ASPRV1	73.9505	0.0590644	0.191141	0.509033	0.800824
ASPSCR1	1865.14	-0.311965	0.414876	0.0277929	0.252636
ASRGL1	270.746	-0.0398739	0.194795	0.608337	0.852391
ASS1	10517.7	-0.0891509	0.231939	0.0260225	0.246474
ASTE1	678.956	0.1786	0.206196	0.139629	0.491389
ASTL	21.4439	-0.0135952	0.196506	0.822888	0.946321
ASTN1	34.5938	-0.0572643	0.214739	0.161661	0.52277
ASTN2	1141.56	-0.0671866	0.212984	0.236824	0.605076
ASUN	3696.57	-0.0475324	0.17929	0.603104	0.849754
ASXL1	43034.6	0.00169667	0.143298	0.985928	0.997422
ASXL2	7264.05	0.163894	0.171421	0.167426	0.529804
ASXL3	291.739	0.0282067	0.206006	0.468689	0.781323
ATAD1	2623.52	-0.0691992	0.148121	0.503561	0.79832
ATAD2	11660.4	-0.754915	0.878549	0.00496734	0.113418
ATAD2B	5551.52	0.0908883	0.174781	0.391784	0.731123
ATAD3A	2675.98	-0.213246	0.30717	0.0560314	0.337946
ATAD3B	3304.46	-0.131751	0.232622	0.153143	0.510948
ATAD3C	1307.07	-0.0715751	0.221025	0.066782	0.365566
ATAD5	2496.92	-0.124175	0.242436	0.0973886	0.424808
ATAT1	1158.52	0.0113372	0.188967	0.884476	0.965836
ATE1	2568.12	0.0373497	0.154524	0.72546	0.906555
ATE1-AS1	40.663	0.00583658	0.187516	0.945011	0.986634
ATF1	1277.75	0.140377	0.151925	0.200074	0.570307
ATF2	4392.52	0.177388	0.183347	0.141881	0.495353
ATF3	708.091	-0.0304126	0.204517	0.497794	0.795997
ATF4	13003.7	-0.0795707	0.137365	0.446327	0.76653
ATF5	4684.34	-0.0195914	0.203871	0.629806	0.862233
ATF6	7938.63	-0.0293888	0.141839	0.727957	0.907268
ATF6B	5003.93	0.0137684	0.160676	0.890101	0.966789
ATF7	2122.97	0.235135	0.200577	0.0689221	0.370102
ATF7IP	18501.7	0.0748107	0.179214	0.4658	0.779737
ATF7IP2	1710.04	0.108371	0.209672	0.265824	0.630729
ATG10	577.715	-0.0173784	0.177183	0.848495	0.953696
ATG101	1045.49	-0.127501	0.193914	0.254195	0.621347
ATG12	963.295	0.19862	0.201753	0.110618	0.448091
ATG13	4437.05	0.2531	0.183333	0.0480834	0.317065
ATG14	1142.75	0.341162	0.233469	0.0220292	0.231054
ATG16L1	1992.6	0.0509219	0.152694	0.630393	0.862277
ATG16L2	3631.61	0.107729	0.202558	0.285885	0.648071
ATG2A	4036.22	-0.0247788	0.175651	0.789946	0.933245
ATG2B	5703.27	0.0633639	0.18085	0.52149	0.809095
ATG3	3331.62	-0.0077044	0.137839	0.923265	0.97914
ATG4A	935.553	-0.0372642	0.153363	0.725916	0.906766
ATG4B	2783.15	-0.0375804	0.155856	0.715105	0.902095
ATG4C	1736.51	0.110992	0.21583	0.231256	0.600213
ATG4D	1365.63	-0.255662	0.292325	0.0570776	0.340933
ATG5	1528.7	0.0155609	0.174279	0.87054	0.96181
ATG7	2781.72	0.258417	0.342151	0.0416097	0.297479
ATG9A	2625.68	-0.109658	0.169594	0.324073	0.681869
ATG9B	106.651	-0.0298321	0.201813	0.57998	0.840033
ATHL1	10226.3	-0.0274495	0.200813	0.611465	0.854051
ATIC	3981.12	-0.107156	0.204393	0.275912	0.639542
ATL1	524.033	-0.00308461	0.190765	0.970097	0.994158
ATL2	5091.25	-0.326502	0.435404	0.025252	0.243915
ATL3	6257.85	0.0107122	0.17163	0.869346	0.96181
ATM	147074	0.471692	0.338743	0.0113434	0.169224
ATMIN	5088.86	0.13876	0.174132	0.230966	0.599719
ATN1	35587.6	-0.0820061	0.214231	0.239555	0.608179
ATOH8	510.137	0.0223831	0.206592	0.454127	0.772676
ATOX1	2336.56	0.0162694	0.184362	0.883661	0.965836
ATP10A	2544.43	0.17434	0.286789	0.0522934	0.328704
ATP10B	83.624	-0.091844	0.231425	0.0554448	0.336422
ATP10D	3895.98	0.850549	0.397802	0.00116437	0.0599319
ATP11A	11323.5	-0.0488634	0.192493	0.540866	0.820375
ATP11B	9082.83	0.211515	0.295284	0.065654	0.361589
ATP11C	5689.72	-0.0238098	0.194166	0.726247	0.906766
ATP13A1	7722.61	-0.0691588	0.173901	0.491513	0.794272
ATP13A2	5672.79	0.0615913	0.16938	0.552344	0.826295
ATP13A3	15166.1	-0.253469	0.259246	0.0613656	0.350953
ATP13A4	1240.17	0.0172567	0.191599	0.817746	0.944017
ATP13A5	1931.47	-0.0724559	0.220113	0.113893	0.453725
ATP1A1	22433.7	-0.2572	0.283509	0.0575448	0.342115
ATP1A1-AS1	125.106	0.0447613	0.192195	0.575458	0.838416
ATP1A2	253.884	0.0855601	0.2273	0.0622906	0.353128
ATP1A3	1143.17	0.04553	0.210375	0.246161	0.61353
ATP1A4	39.5798	0.0259987	0.205677	0.505932	0.799366
ATP1B1	12437.5	-0.763411	0.55834	0.00354957	0.0982224
ATP1B2	162.287	0.117436	0.243099	0.0742053	0.382805
ATP1B3	3674.79	-0.0686069	0.1767	0.497639	0.795997
ATP2A1	401.103	-0.369007	0.700209	0.0117282	0.171639
ATP2A2	18824.2	-0.054376	0.174265	0.583852	0.841208
ATP2A3	8349.46	0.776724	0.277699	0.000284393	0.0289029
ATP2B1	7446.36	0.128149	0.228094	0.162754	0.523947
ATP2B2	1135.93	-0.0606348	0.219699	0.00541199	0.119292
ATP2B4	11901.9	0.112232	0.20939	0.253368	0.620816
ATP2C1	11942.5	-0.143271	0.226743	0.165296	0.527081
ATP2C2	1172.39	-0.0208259	0.207561	0.29845	0.659981
ATP5A1	18409.9	-0.077433	0.18431	0.434803	0.758669
ATP5B	16769.9	-0.299621	0.288192	0.0403385	0.293136
ATP5C1	9135.35	-0.234383	0.222822	0.0742444	0.382805
ATP5D	1639.9	-0.103024	0.214043	0.243381	0.610931
ATP5E	219.887	0.0364431	0.194211	0.62018	0.858172
ATP5EP2	315.619	0.0628452	0.197238	0.450751	0.769745
ATP5F1	3727.13	-0.00547672	0.168989	0.97575	0.995703
ATP5G1	910.311	-0.558146	0.396566	0.00714022	0.136453
ATP5G2	2683.92	0.045625	0.154493	0.667028	0.880008
ATP5G3	2925.02	-0.286035	0.290556	0.0447277	0.307545
ATP5H	2642.42	-0.316229	0.278744	0.0348125	0.27613
ATP5I	2898.97	-0.332116	0.389369	0.0284915	0.255997
ATP5J	2942.92	-0.223761	0.266717	0.0759477	0.387498
ATP5J2	424.866	-0.309357	0.319229	0.0373535	0.283422
ATP5L	6320.91	-0.0759731	0.196822	0.387519	0.727644
ATP5L2	188.265	-0.0184158	0.169304	0.852017	0.955021
ATP5O	4073.39	-0.141717	0.187005	0.216483	0.588274
ATP5S	564.131	0.0315953	0.138751	0.762383	0.923126
ATP5SL	751.148	-0.108966	0.181408	0.316228	0.676149
ATP6AP1	9545.72	-0.0248769	0.172644	0.790133	0.933245
ATP6AP1L	274.119	-0.0729149	0.207077	0.326126	0.68319
ATP6AP2	7797.74	0.125785	0.176036	0.237963	0.606333
ATP6V0A1	4982.92	0.0832306	0.193371	0.386176	0.7269
ATP6V0A2	2664.4	0.0345744	0.189439	0.672234	0.88228
ATP6V0A4	73.0006	-0.0903499	0.236769	0.000565455	0.0415782
ATP6V0B	3410.79	-0.0419628	0.164328	0.664566	0.878409
ATP6V0C	14433.8	0.038947	0.177928	0.683959	0.888231
ATP6V0D1	2592.02	0.0845867	0.198338	0.359303	0.70805
ATP6V0D2	445.004	2.01927	0.973948	0.000288112	0.0289963
ATP6V0E1	4303.61	0.12198	0.174867	0.271754	0.636114
ATP6V0E2	1338.97	-0.0550811	0.201575	0.42258	0.750768
ATP6V1A	5135.79	0.047844	0.132652	0.64406	0.867888
ATP6V1B1	1366.86	-0.0459948	0.20837	0.31147	0.67242
ATP6V1B2	6544.39	0.102634	0.216806	0.228528	0.598086
ATP6V1C1	4932.77	0.124154	0.167588	0.269661	0.634628
ATP6V1C2	272.802	-0.118921	0.245219	0.0678268	0.367058
ATP6V1D	1341.25	0.0428497	0.149297	0.688078	0.890151
ATP6V1E1	2614.45	0.103514	0.147285	0.335587	0.690717
ATP6V1E2	98.4377	-0.0379068	0.178802	0.686701	0.889083
ATP6V1F	3151.88	0.0238802	0.172184	0.793609	0.933966
ATP6V1G1	1976.91	0.0312829	0.143059	0.772182	0.926814
ATP6V1G2	56.7629	0.0412355	0.206775	0.388445	0.728329
ATP6V1H	2286.53	0.0164457	0.147963	0.875056	0.962636
ATP7A	3215.5	0.273064	0.168329	0.0296245	0.258876
ATP7B	1449.89	-0.236131	0.31309	0.0545164	0.334584
ATP8A1	3581.13	0.268977	0.404773	0.0292502	0.258179
ATP8A2	82.9285	0.00323414	0.204368	0.92679	0.979819
ATP8B1	5032.71	-0.0528861	0.197151	0.49026	0.794272
ATP8B2	6007.89	0.660238	0.452432	0.00509315	0.115268
ATP8B3	567.9	0.0792509	0.203455	0.348885	0.700318
ATP8B4	1800.93	0.0771956	0.2085	0.30883	0.670257
ATP9A	6051.24	-0.0345945	0.194655	0.629639	0.862233
ATP9B	4014	0.432854	0.210216	0.00456435	0.108766
ATPAF1	1580.09	-0.0723724	0.16759	0.487717	0.792842
ATPAF2	562.89	0.00052198	0.159734	0.996099	0.999539
ATPIF1	1882.1	-0.128223	0.232261	0.158477	0.518529
ATR	62772	-0.0486485	0.168484	0.629111	0.862055
ATRAID	2383.22	-0.026307	0.14831	0.806744	0.939602
ATRIP	818.013	-0.0709439	0.177295	0.484916	0.791427
ATRN	6914.8	-0.0444732	0.189657	0.586705	0.843064
ATRNL1	767.405	-0.0365433	0.209833	0.197471	0.567013
ATRX	129917	0.0267893	0.161939	0.796595	0.935079
ATXN1	7229.59	0.322158	0.212733	0.0240428	0.240628
ATXN10	5140.74	-0.119213	0.212897	0.226875	0.596578
ATXN1L	3646.79	0.0832217	0.184766	0.413443	0.744563
ATXN2	9150.92	-0.0479777	0.1565	0.643861	0.867876
ATXN2L	30860.8	-0.0269777	0.168179	0.782413	0.930129
ATXN3	1966.18	0.109012	0.168179	0.331247	0.687196
ATXN7	5634.39	0.0768165	0.184923	0.441737	0.76355
ATXN7L1	1953.23	0.0452608	0.185771	0.61272	0.854629
ATXN7L2	540.078	-0.0616533	0.175561	0.539419	0.819362
ATXN7L3	2190.37	0.0137323	0.144086	0.903358	0.972117
ATXN7L3B	1057.96	0.00203503	0.16525	0.982699	0.99639
AUH	1493.8	-0.0735533	0.177096	0.471399	0.783056
AUNIP	247.431	-1.44281	0.973754	0.00095648	0.0541855
AUP1	4012.42	-0.198378	0.161552	0.0860916	0.406341
AURKA	6577.8	-0.839663	0.76935	0.00358093	0.0984034
AURKAIP1	2225.33	-0.234681	0.232032	0.0750731	0.385581
AURKB	809.336	-1.06484	0.694821	0.0017669	0.0702664
AURKC	99.5524	0.0268654	0.178724	0.773245	0.926814
AUTS2	15387.7	-0.822384	0.395288	0.00121539	0.0610908
AVEN	601.396	-0.102808	0.174027	0.344425	0.696602
AVIL	893.614	0.00408179	0.190951	0.95644	0.990033
AVL9	2913.55	0.00115778	0.148659	0.994066	0.999217
AVPI1	205.6	-0.0515367	0.208765	0.309683	0.670711
AVPR1A	400.003	-0.113651	0.249901	0.00828297	0.147171
AVPR2	47.9813	0.178663	0.31744	0.0155276	0.196588
AXDND1	50.7514	-0.0367628	0.196388	0.606903	0.851441
AXIN1	4419.53	-0.0759607	0.179227	0.454971	0.772913
AXIN2	1184.98	0.0343504	0.169539	0.72827	0.907448
AXL	34507.6	0.144794	0.235596	0.146896	0.502724
AZGP1	17322.6	-0.080106	0.229516	0.000495813	0.0389035
AZGP1P1	67.0299	-0.100669	0.235437	0.0781845	0.391728
AZI2	2858.04	0.125341	0.212248	0.223057	0.593875
AZIN1	13694.7	-0.116843	0.207735	0.244343	0.611706
AZIN2	777.331	0.0534118	0.203774	0.41648	0.746414
AZU1	71.7943	0.0351447	0.203914	0.501006	0.797046
B2M	61125	0.0822707	0.210126	0.291902	0.655085
B3GALNT1	871.523	0.031188	0.180362	0.734274	0.909986
B3GALNT2	4242.58	-0.163572	0.252312	0.108885	0.445252
B3GALT1	21.234	0.0434066	0.209546	0.312053	0.672848
B3GALT2	36.1826	0.0975238	0.233282	0.0757456	0.387481
B3GALT4	613.068	0.425526	0.439547	0.0172326	0.207101
B3GALT5	21.326	-0.0410713	0.210417	0.219941	0.593041
B3GALT6	257.979	0.0132224	0.183789	0.877727	0.963817
B3GALTL	688.897	0.0806335	0.176338	0.44166	0.76355
B3GAT1	151.862	-0.00968075	0.206061	0.655977	0.874172
B3GAT2	28.0368	-0.0390751	0.211372	0.114646	0.454329
B3GAT3	1474.09	-0.00334236	0.167129	0.978654	0.996147
B3GNT1	814.29	-0.00719879	0.177633	0.936507	0.983555
B3GNT2	2614.29	0.0870279	0.196603	0.36145	0.709796
B3GNT3	875.014	0.00373452	0.201736	0.924755	0.979622
B3GNT4	38.8142	-0.0395172	0.210194	0.20873	0.578682
B3GNT5	1139.12	-0.0467453	0.199551	0.5015	0.797046
B3GNT7	536.059	0.129873	0.232538	0.155743	0.515274
B3GNT8	382.003	0.383884	0.47393	0.020292	0.222084
B3GNT9	806.693	0.169417	0.244834	0.121695	0.466455
B3GNTL1	299.685	0.0118068	0.179816	0.895474	0.968558
B4GALNT1	199.798	-0.0563187	0.208069	0.326762	0.683689
B4GALNT2	28.9714	-0.0216127	0.208653	0.286808	0.648368
B4GALNT3	3597.13	-0.101546	0.242048	0.0023678	0.0803315
B4GALNT4	4046.01	-0.0568655	0.217724	0.00771665	0.142426
B4GALT1	15069	-0.12796	0.255938	0.0291675	0.257701
B4GALT2	3186.45	-0.140177	0.237755	0.138603	0.48961
B4GALT3	3218.35	-0.0772994	0.175346	0.455157	0.772913
B4GALT4	1640.68	-0.116493	0.190892	0.28435	0.646707
B4GALT5	3604.2	-0.0281351	0.181217	0.753056	0.918561
B4GALT6	270.513	0.0816155	0.207569	0.314557	0.675056
B4GALT7	1463.82	0.0148932	0.1398	0.891346	0.967372
B9D1	396.65	-0.0926381	0.197834	0.33616	0.691122
B9D2	170.14	-0.0179668	0.164538	0.856391	0.956827
BAALC	98.3735	0.123405	0.247833	0.0692634	0.37093
BAAT	4495.61	-0.013939	0.206413	0.605037	0.850504
BABAM1	2947.91	-0.0957371	0.150398	0.371231	0.716434
BACE1	946.799	0.0232719	0.19419	0.743725	0.914638
BACE1-AS	75.2425	0.0660766	0.189019	0.482132	0.78976
BACE2	3542.05	-0.0133396	0.192608	0.846652	0.952976
BACH1	3970.89	0.105643	0.203967	0.289043	0.651215
BACH2	1038.28	0.0854868	0.223432	0.128689	0.475732
BAD	922.115	-0.0547813	0.150626	0.606024	0.850589
BAG1	4401.83	-0.114352	0.234943	0.116577	0.457046
BAG2	561.699	0.0668687	0.189611	0.475548	0.78534
BAG3	4808.28	-0.142395	0.243608	0.120933	0.465116
BAG4	2880.97	-0.164305	0.260301	0.0960463	0.422224
BAG5	1739	-0.00139784	0.142512	0.987907	0.997598
BAG6	13169.3	-0.115124	0.169401	0.299486	0.660517
BAHCC1	3600.15	-0.100372	0.215997	0.230096	0.598894
BAHD1	2822.07	-0.0612978	0.171054	0.54803	0.825045
BAI1	701.382	0.0614891	0.213665	0.240981	0.609302
BAI2	1127.24	-0.0679129	0.208537	0.304901	0.665632
BAI3	197.62	-0.00965631	0.194339	0.885294	0.965928
BAIAP2	2938.35	-0.129388	0.240081	0.121098	0.465491
BAIAP2-AS1	302.54	0.0179624	0.163201	0.831956	0.948182
BAIAP2L1	4911.6	-1.72173	0.855175	0.000240249	0.0272207
BAIAP2L2	160.319	-0.113239	0.234143	0.124293	0.470406
BAIAP3	1026	-0.0227638	0.205689	0.521522	0.809095
BAK1	1013.43	0.131356	0.175795	0.250043	0.616621
BAMBI	1042.99	-0.0218635	0.195262	0.812388	0.942138
BANF1	1683.14	-0.115302	0.175281	0.296815	0.658836
BANK1	1949.2	0.124608	0.254151	0.0328509	0.270233
BANP	2321.06	0.00454215	0.152512	0.975559	0.995677
BAP1	14316.2	-0.0782225	0.171541	0.484583	0.791396
BARD1	2321.6	-0.241953	0.221716	0.0677475	0.367058
BARHL2	23.5537	-0.00379972	0.208123	0.704352	0.897504
BARX2	367.911	-0.0280773	0.196724	0.669279	0.88113
BASP1	793.208	0.336757	0.271257	0.0284302	0.255852
BATF	223.915	0.217613	0.322926	0.0486925	0.319445
BATF2	286.7	0.0298281	0.19669	0.655753	0.874052
BATF3	134.931	0.0137483	0.195714	0.827259	0.947544
BAX	2600.01	0.0470765	0.146843	0.653678	0.872922
BAZ1A	9314.42	0.10258	0.171706	0.349728	0.701052
BAZ1B	13846.3	-0.223664	0.174202	0.0680761	0.367891
BAZ2A	15403.9	0.087611	0.171014	0.401504	0.738413
BAZ2B	12912.8	0.277565	0.231226	0.0469852	0.313804
BBC3	250.307	0.0308029	0.188257	0.715143	0.902095
BBIP1	728.301	0.324857	0.309257	0.0341123	0.274467
BBOX1	492.206	-0.0783381	0.227692	0.00423373	0.105343
BBS1	2174.57	-0.0238034	0.171397	0.828869	0.947544
BBS10	1409	0.0505406	0.17771	0.605004	0.850504
BBS12	439.771	0.474926	0.331087	0.010791	0.165626
BBS2	2910.43	0.198937	0.252195	0.0983543	0.426644
BBS4	892.709	0.29521	0.222526	0.0366204	0.281209
BBS5	585.033	0.265935	0.207359	0.0496509	0.322225
BBS7	1160.7	0.0639194	0.173575	0.528839	0.813234
BBS9	2564.78	0.486494	0.292099	0.00761182	0.141222
BBX	4333.6	0.25978	0.214931	0.0533345	0.331175
BCAM	17956.5	-0.0598846	0.212661	0.221309	0.593705
BCAN	219.068	0.0191441	0.207618	0.386341	0.7269
BCAP29	2330.22	-0.0909576	0.172652	0.395085	0.733966
BCAP31	4162.27	-0.216165	0.232088	0.0903604	0.412149
BCAR1	3881.88	-0.093085	0.185504	0.358399	0.708002
BCAR3	1232.66	0.158893	0.23767	0.137616	0.487734
BCAS1	604.889	0.0224291	0.207567	0.400704	0.737861
BCAS2	1225.78	0.0353259	0.164309	0.729335	0.908168
BCAS3	3339.34	0.372003	0.203242	0.0105887	0.165148
BCAS4	675.63	0.047068	0.209041	0.275843	0.639542
BCAT1	1477.12	0.0784982	0.20104	0.364914	0.71261
BCAT2	1808.6	-0.0611714	0.189461	0.503658	0.79832
BCCIP	2668.44	-0.0780641	0.200558	0.363302	0.711247
BCDIN3D	228.214	0.00394376	0.162882	0.976903	0.996002
BCDIN3D-AS1	20.146	-0.0209745	0.197286	0.744698	0.915203
BCHE	669.377	-0.0454987	0.211924	0.158014	0.517944
BCKDHA	3690.13	-0.161563	0.226201	0.146707	0.502458
BCKDHB	1780.28	-0.0610646	0.194392	0.438788	0.762056
BCKDK	2869.64	-0.00350127	0.166435	0.969413	0.993965
BCL10	1395.09	0.156203	0.215279	0.168831	0.531261
BCL11A	1357.62	-0.0152313	0.203823	0.659843	0.875721
BCL11B	1701.02	0.167205	0.303825	0.0106755	0.165154
BCL2	4144.73	0.153783	0.230678	0.159816	0.520258
BCL2A1	640.937	0.929828	0.610182	0.0024194	0.0810139
BCL2L1	3365.22	0.062228	0.182682	0.511994	0.802882
BCL2L10	12.5536	-0.00427449	0.205671	0.883068	0.965836
BCL2L11	1770.18	0.0303899	0.167111	0.764272	0.924027
BCL2L12	736.325	-0.367404	0.228655	0.0153509	0.196257
BCL2L13	2417.21	-0.014189	0.153416	0.887753	0.966395
BCL2L14	98.9494	-0.0554295	0.193674	0.49902	0.796281
BCL2L15	24.6727	0.0813504	0.216531	0.238289	0.606666
BCL2L2	512.113	0.0108638	0.174495	0.907301	0.972918
BCL3	3693.96	-0.0117232	0.173175	0.909878	0.974085
BCL6	27827.5	-0.0437626	0.192707	0.589208	0.843901
BCL6B	788.648	0.12945	0.213048	0.214262	0.585154
BCL7A	654.833	-0.0565707	0.208233	0.31431	0.67494
BCL7B	1239.67	-0.0510284	0.161222	0.622359	0.859305
BCL7C	1380.02	0.0731805	0.179709	0.476833	0.78615
BCL9	6018.73	-0.0812271	0.209676	0.283681	0.646246
BCL9L	13878.5	-0.0286975	0.173288	0.763788	0.923796
BCLAF1	10211.9	0.0277482	0.160176	0.789935	0.933245
BCMO1	25.3462	-0.114488	0.247534	0.0372758	0.283104
BCO2	1239.03	-0.0175571	0.20449	0.569644	0.836123
BCOR	33056.5	0.0153169	0.176426	0.874039	0.96238
BCORL1	18148.3	-0.0684572	0.198405	0.411644	0.744106
BCR	39195.4	-0.0807852	0.193108	0.381629	0.723733
BCRP3	300.347	-0.0127569	0.185786	0.873938	0.96238
BCS1L	1496.23	-0.28569	0.250842	0.0455086	0.309138
BDH1	1677.47	-1.64027	0.833462	0.000292187	0.0290815
BDH2	1066.53	0.0722685	0.186606	0.454782	0.772913
BDKRB1	51.9972	-0.0449998	0.204086	0.456797	0.773884
BDKRB2	264.648	-0.000177627	0.194219	0.926356	0.979683
BDNF	21.4093	-0.0273046	0.202644	0.603019	0.849754
BDNF-AS	51.3283	-0.0468905	0.195255	0.550518	0.8258
BDP1	14863.5	0.0448512	0.184512	0.63688	0.865574
BEAN1	58.4675	0.0976028	0.233685	0.0631727	0.35566
BECN1	3477.07	0.0889939	0.150184	0.388813	0.72857
BEGAIN	103.872	-0.766585	0.958362	0.00512497	0.115618
BEND3	614.966	-0.074439	0.215338	0.211582	0.58202
BEND4	93.2556	0.0252895	0.209122	0.150252	0.507299
BEND5	192.664	0.145585	0.269197	0.0393926	0.290756
BEND6	148.443	0.240983	0.424596	0.0114899	0.169958
BEND7	360.984	-0.0318771	0.195362	0.646055	0.869121
BEST1	394.556	0.685469	0.398132	0.00356736	0.098266
BEST3	31.4027	-3.48071	0.895188	2.8652e-06	0.00156414
BEST4	17.9352	0.0241	0.202086	0.647862	0.869495
BET1	990.727	-0.120662	0.199108	0.257837	0.624655
BET1L	587.831	0.0269716	0.142224	0.77113	0.926497
BEX1	37.7999	-0.0294297	0.210214	0.0981969	0.426066
BEX2	607.142	-0.0302488	0.206606	0.374198	0.719409
BEX4	490.991	0.00952461	0.182997	0.914157	0.975739
BEX5	55.6694	-0.0411926	0.202928	0.485867	0.792017
BFAR	2446.56	0.0568973	0.149227	0.599345	0.848436
BFSP1	102.437	-0.099556	0.22344	0.180204	0.546068
BFSP2	15.0039	0.0584589	0.216314	0.142469	0.496153
BGLAP	13.8924	-0.0590364	0.209881	0.319224	0.678403
BGN	26465.4	0.0618806	0.199447	0.434808	0.758669
BHLHA15	523.673	-0.271621	0.398826	0.0306559	0.263109
BHLHB9	422.251	-0.0483982	0.150905	0.674761	0.883397
BHLHE22	70.6524	0.166497	0.296641	0.0226121	0.233979
BHLHE40	8289.06	-0.0516396	0.201383	0.450423	0.769745
BHLHE40-AS1	119.59	-0.0059221	0.198673	0.912239	0.975262
BHLHE41	1968.26	0.524976	0.757666	0.0089465	0.154083
BHMT	2735.72	-0.0282184	0.209569	0.163847	0.524752
BHMT2	1602.76	0.00693101	0.205734	0.798659	0.936071
BICC1	3154.52	0.245862	0.379974	0.0267538	0.249786
BICD1	3059.52	-0.0521541	0.18846	0.553125	0.826659
BICD2	4046.19	-0.0051576	0.168816	0.961627	0.991208
BID	787.862	0.00972871	0.18003	0.917483	0.977148
BIK	165.755	-0.0145355	0.197188	0.797902	0.935851
BIN1	2059.55	0.0331543	0.205066	0.469748	0.781972
BIN2	2614.12	0.0943885	0.228578	0.105101	0.438448
BIN3	659.544	-0.0270078	0.188373	0.734354	0.909986
BIRC2	4316.94	0.0412632	0.176037	0.671829	0.882249
BIRC3	5873.13	0.363705	0.423065	0.0237184	0.239495
BIRC5	581.085	-0.34214	1.04673	0.00297565	0.0899434
BIRC6	47547.5	0.0954038	0.1421	0.372642	0.717831
BIRC7	118.555	0.0809945	0.227574	0.0228122	0.234836
BIVM	97.9291	0.101279	0.205592	0.293826	0.656408
BLCAP	1582.74	-0.0459781	0.174388	0.637765	0.866094
BLID	34.7919	0.247729	0.443888	0.0131864	0.181894
BLK	531.94	0.0354072	0.21024	0.168972	0.531261
BLM	2110.66	-0.15562	0.258728	0.0900883	0.411882
BLMH	1846.65	0.0506187	0.186204	0.57729	0.838684
BLNK	2481.87	0.150944	0.24318	0.126496	0.472618
BLOC1S1	207.453	0.0442764	0.195134	0.568953	0.835891
BLOC1S2	1084.02	0.138909	0.234107	0.151026	0.508547
BLOC1S3	304.693	3.08989e-05	0.163083	0.997261	0.999814
BLOC1S4	329.249	0.102696	0.170961	0.346342	0.698494
BLOC1S5	20.7489	0.0627375	0.207563	0.358037	0.707849
BLOC1S6	1005.17	0.289431	0.259083	0.0457088	0.309744
BLVRA	932.013	0.3973	0.367932	0.0199845	0.220601
BLVRB	2623.28	-0.0585549	0.2007	0.443217	0.764803
BLZF1	2360.62	-0.0794817	0.165531	0.474611	0.784919
BMF	876.798	0.203909	0.283193	0.0747909	0.38463
BMI1	41.6566	0.0544627	0.194292	0.520275	0.808345
BMP1	7932.86	-0.038623	0.201146	0.524119	0.810611
BMP10	32.0627	0.00233462	0.20811	0.844178	0.952039
BMP2	237.094	0.0389435	0.202519	0.507841	0.800277
BMP2K	9852.6	0.139121	0.24371	0.119482	0.462796
BMP3	32.5582	0.0391306	0.208848	0.378574	0.722217
BMP4	462.711	0.204994	0.289753	0.0705864	0.37392
BMP5	267.91	0.0344179	0.207614	0.346318	0.698494
BMP6	329.905	0.104214	0.213842	0.247031	0.613857
BMP7	141.806	-0.0277579	0.203443	0.55127	0.825971
BMP8A	327.631	-0.0148561	0.203727	0.702178	0.896635
BMP8B	414.952	-0.0577555	0.207347	0.342863	0.695885
BMPER	173.962	-0.0130046	0.203562	0.734427	0.910015
BMPR1A	3473.17	-0.0930349	0.187879	0.366535	0.713544
BMPR1B	3826.88	-0.0537785	0.215809	0.0310995	0.264707
BMPR2	10806.4	0.00475781	0.13957	0.978849	0.996147
BMS1	8334.99	-0.127182	0.171663	0.258561	0.625366
BMS1P20	2088.15	0.0453485	0.146722	0.660527	0.875972
BMX	92.4595	0.270065	0.522832	0.00728956	0.138513
BNC1	80.567	-0.0012102	0.20418	0.979991	0.996147
BNC2	1834.71	0.85879	0.49392	0.00205954	0.0753505
BNIP1	286.038	-0.0341161	0.168568	0.734297	0.909986
BNIP2	4223.2	0.183254	0.235663	0.126369	0.472618
BNIP3	1930.78	-0.136871	0.233757	0.137022	0.487115
BNIP3L	2903.78	0.253808	0.320501	0.0505026	0.323757
BNIPL	269.996	-0.0356114	0.206056	0.418125	0.74774
BOC	2210.03	0.0798501	0.212922	0.272257	0.636437
BOD1	1628.66	-0.146722	0.207092	0.190572	0.55801
BOD1L1	13774.7	0.190802	0.208217	0.118365	0.460807
BOK	536.328	-0.0487784	0.20498	0.405112	0.741375
BOLA1	401.312	-0.161447	0.248946	0.117334	0.458618
BOLA2	581.664	-0.0594588	0.181753	0.540637	0.820337
BOLA3	386.138	-0.300379	0.305352	0.0404304	0.293363
BOP1	1732.38	-0.16467	0.276001	0.0591053	0.345924
BORA	1278.61	-0.169014	0.204641	0.148767	0.505001
BPGM	670.71	-0.029371	0.193119	0.690605	0.891335
BPHL	1153.67	-0.384961	0.469254	0.0194562	0.218581
BPI	126.993	0.0558973	0.213876	0.178263	0.543837
BPIFA1	34.1198	0.0102519	0.208625	0.341443	0.694503
BPIFB1	484.805	-0.0147612	0.207998	0.24311	0.61085
BPIFB2	471.946	0.00167941	0.208175	0.879119	0.964312
BPNT1	2323.81	-0.0746502	0.197146	0.396861	0.734818
BPTF	23603.1	0.159846	0.195284	0.175286	0.539834
BRAF	28474.6	-0.0624843	0.172914	0.537339	0.818065
BRAP	1709.84	0.0681458	0.187505	0.473149	0.783863
BRAT1	1979.59	-0.094851	0.171057	0.379099	0.72239
BRCA1	22988.8	-0.588267	0.573818	0.00792118	0.143417
BRCA2	24344.7	-0.44576	0.279508	0.00992952	0.160464
BRCC3	1600.28	-0.192509	0.183867	0.114988	0.454385
BRD1	6204.72	-0.169204	0.172472	0.151768	0.509917
BRD2	22266.7	0.0627349	0.161253	0.554288	0.827221
BRD3	4131.21	-0.0787054	0.176722	0.456275	0.773563
BRD4	19180.4	-0.0733251	0.131356	0.474394	0.784703
BRD7	3791.09	0.0851251	0.172935	0.425102	0.753019
BRD8	3861.88	-0.097172	0.195508	0.329588	0.68626
BRD9	2825.8	-0.0750034	0.166644	0.480453	0.788831
BRDT	24.7803	-0.0131095	0.207988	0.378792	0.722328
BRE	2708.05	0.252284	0.162625	0.0388432	0.289636
BRF1	2114.99	-0.131048	0.158952	0.246306	0.613564
BRF2	1063.93	-0.0882561	0.211388	0.271943	0.63615
BRI3	6575.6	-0.0289847	0.190202	0.702961	0.897039
BRI3BP	965.725	-0.0458673	0.181388	0.618536	0.857464
BRICD5	156.417	-0.0684586	0.190255	0.460724	0.775888
BRINP1	79.3282	-0.15938	0.30503	0.0013268	0.0639068
BRINP2	279.259	-0.0310114	0.209646	0.148002	0.504493
BRINP3	10149.3	-0.0118361	0.207166	0.530718	0.814108
BRIP1	10628.8	-0.647336	0.643174	0.00634863	0.130448
BRIX1	2307.65	-0.0792388	0.176427	0.447399	0.767317
BRK1	3094.69	0.0417739	0.155915	0.688533	0.890151
BRMS1	1313.16	0.00979778	0.174181	0.921511	0.978545
BRMS1L	512.61	-0.048882	0.169618	0.625527	0.861039
BROX	5051.64	0.0336278	0.169597	0.739081	0.911964
BRPF1	2671.37	0.131305	0.158329	0.24303	0.61085
BRPF3	5074.78	-0.0878117	0.192574	0.3691	0.715245
BRSK1	1976.03	-0.0459058	0.209527	0.259705	0.625786
BRSK2	315.421	-0.00275844	0.205723	0.914345	0.975825
BRWD1	19842.6	0.0295886	0.1648	0.773058	0.926814
BRWD1-IT2	37.037	-0.0327301	0.203166	0.544851	0.82255
BRWD3	9647.32	0.107374	0.158899	0.330772	0.687062
BSCL2	71.2434	-0.0467555	0.191741	0.576619	0.838503
BSDC1	3602.26	-0.0153101	0.153108	0.86424	0.960034
BSG	11040.4	-0.11011	0.197728	0.275182	0.638922
BSN	1041.63	-0.0408492	0.209564	0.229133	0.598086
BSPRY	969.171	-0.0716353	0.222175	0.0347724	0.27613
BST1	342.424	0.116041	0.221858	0.195542	0.565027
BST2	8719.79	-0.024771	0.189057	0.749819	0.917409
BTAF1	13939.6	0.0445574	0.143812	0.674638	0.883397
BTBD1	3519.84	0.221109	0.212351	0.0859743	0.406341
BTBD10	2292.55	0.187634	0.167384	0.119978	0.463643
BTBD11	254.378	1.06709	0.378223	0.000170132	0.0220498
BTBD16	58.2421	-0.199103	0.344292	0.0166872	0.203896
BTBD19	1201.98	0.0563447	0.200998	0.453763	0.772421
BTBD2	5384.06	0.0681181	0.152034	0.524039	0.810608
BTBD3	1296.33	-0.0807451	0.183606	0.424135	0.752343
BTBD6	1942.08	-0.0615896	0.153966	0.557309	0.828993
BTBD7	3794.86	0.0929223	0.161623	0.394725	0.733738
BTBD8	239.707	0.054607	0.175966	0.583438	0.840991
BTBD9	2124.41	0.269081	0.223281	0.0483067	0.317772
BTC	177.211	-0.0639622	0.215939	0.155568	0.51509
BTD	820.881	0.0168905	0.191651	0.820985	0.94571
BTF3	7130.46	0.0776244	0.196462	0.415157	0.745222
BTF3L4	1280.6	-0.0323538	0.170395	0.741502	0.913367
BTG1	4144.09	0.0201781	0.195092	0.770559	0.92612
BTG2	4177.16	0.0805497	0.204716	0.336277	0.691241
BTG3	1540.63	-0.130978	0.197094	0.234182	0.603004
BTK	11245.2	0.105511	0.234723	0.0924555	0.416605
BTLA	460.631	0.159085	0.29467	0.0102536	0.162881
BTN2A1	3570.65	0.264488	0.247814	0.0603868	0.348861
BTN2A2	2254.24	0.466293	0.522184	0.0131391	0.181689
BTN2A3P	312.019	0.389425	0.365397	0.0213952	0.227529
BTN3A1	6697.22	0.414631	0.650809	0.013518	0.184567
BTN3A2	3833.94	0.232356	0.34755	0.0377758	0.285938
BTN3A3	4738.27	0.240548	0.368394	0.0346043	0.275491
BTNL10	67.3398	-0.00146907	0.208048	0.911556	0.974965
BTNL8	14.259	0.00526141	0.205715	0.853325	0.955504
BTNL9	848.425	0.0173503	0.200417	0.743656	0.914638
BTRC	2082.94	0.018473	0.170821	0.846251	0.95272
BUB1	3758.69	-0.310027	0.646712	0.00651919	0.132107
BUB1B	2489.55	-0.286575	0.611879	0.00375423	0.100513
BUB3	6098.54	-0.0326658	0.182875	0.708575	0.89904
BUD13	1488.43	-0.017588	0.176757	0.839127	0.950577
BUD31	2081.34	-0.144327	0.235188	0.146522	0.502458
BVES	199.334	0.0290556	0.19311	0.694581	0.892273
BYSL	704.287	-0.176722	0.274381	0.0761668	0.387741
BZRAP1	2441.37	0.0430455	0.18844	0.618471	0.857459
BZRAP1-AS1	471.92	0.234975	0.410215	0.011942	0.173777
BZW1	6641.53	-0.105931	0.15234	0.325496	0.68295
BZW2	2852.78	-0.128217	0.239086	0.123485	0.46952
C10orf10	1851.38	0.0390451	0.178164	0.686242	0.888887
C10orf105	12.9603	0.0587882	0.21582	0.158718	0.518775
C10orf107	34.7349	0.0685748	0.216429	0.187782	0.553937
C10orf11	552.227	0.0457858	0.199425	0.517229	0.806115
C10orf111	24.3453	-0.0353216	0.203315	0.523822	0.810501
C10orf113	309.044	-0.029948	0.208236	0.253227	0.620811
C10orf12	1622.43	0.0430222	0.162899	0.677168	0.884142
C10orf128	310.959	0.137039	0.259217	0.0529456	0.330727
C10orf131	98.921	0.162821	0.282684	0.0437726	0.304297
C10orf2	862.024	-0.103095	0.213489	0.240106	0.608364
C10orf25	34.8653	-0.0345658	0.198775	0.601182	0.849079
C10orf32	53.2838	0.10109	0.23139	0.110808	0.448149
C10orf35	159.283	-0.057465	0.212354	0.213976	0.585137
C10orf54	1501.24	0.242714	0.354158	0.0382827	0.28796
C10orf55	14.5264	0.0220859	0.208109	0.35133	0.702536
C10orf62	20.8522	-0.0529609	0.217124	0.00490984	0.112914
C10orf67	13.558	-0.0280391	0.209464	0.166973	0.52919
C10orf71	27.0433	-0.00341867	0.207301	0.870317	0.96181
C10orf76	2387.96	0.219787	0.194394	0.08301	0.40192
C10orf82	59.0744	-0.0491021	0.215502	0.0135821	0.184666
C10orf88	783.579	0.115103	0.168361	0.297999	0.659773
C10orf90	96.7232	-0.0650622	0.220042	0.0335465	0.272717
C10orf91	21.2762	0.0511204	0.204778	0.4266	0.753895
C10orf95	18.1245	0.0265413	0.20433	0.567933	0.835124
C11orf1	819.083	-0.125376	0.210778	0.222272	0.593875
C11orf21	490.186	0.143033	0.269935	0.0283472	0.255593
C11orf24	4638.46	-0.0876711	0.142613	0.412981	0.744563
C11orf30	6230.03	0.0138803	0.169169	0.890709	0.967031
C11orf31	1572.33	-0.0290344	0.155719	0.776593	0.928109
C11orf45	52.6684	0.0297752	0.191523	0.715705	0.902192
C11orf48	1135.65	-0.0425727	0.178311	0.655169	0.873704
C11orf49	1259.65	0.0138291	0.174815	0.882106	0.965381
C11orf54	1985.74	-0.0325238	0.199615	0.572744	0.837409
C11orf57	876.622	0.0688467	0.17344	0.504652	0.798724
C11orf58	4241.2	0.053061	0.160972	0.579079	0.839269
C11orf63	727.613	0.729828	0.290618	0.000685929	0.0450986
C11orf65	148.489	-0.0991838	0.20669	0.295822	0.658174
C11orf68	1190.88	0.119416	0.195662	0.271262	0.635845
C11orf70	82.5868	0.0220559	0.202017	0.65945	0.875706
C11orf71	253.662	-0.00986095	0.190904	0.892239	0.967929
C11orf73	925.971	0.0813497	0.157242	0.467301	0.780134
C11orf74	581.483	-0.0136028	0.138851	0.893785	0.968023
C11orf80	1940.95	-0.0336242	0.17924	0.717591	0.903043
C11orf83	729.675	-0.260981	0.312505	0.0506897	0.324281
C11orf84	1584.89	-0.0419907	0.193163	0.580093	0.840048
C11orf88	16.93	-0.00643546	0.20836	0.409592	0.743593
C11orf91	16.7991	-0.0949257	0.228256	0.131716	0.47985
C11orf94	47.7634	-0.0241462	0.188274	0.765634	0.924581
C11orf95	739.767	-0.0315274	0.178788	0.725514	0.906555
C11orf96	769.324	0.0956945	0.218605	0.21066	0.581253
C12orf10	1302.77	0.0804002	0.167294	0.458575	0.774538
C12orf29	1272.3	-0.158821	0.205159	0.171688	0.534753
C12orf4	2686.47	-0.00999378	0.183836	0.916841	0.976926
C12orf42	84.5923	-0.000912656	0.205012	0.947051	0.987161
C12orf43	372.209	0.0276953	0.173004	0.777173	0.928246
C12orf45	477.833	-0.0389245	0.168747	0.695511	0.892572
C12orf49	1087.71	0.0313705	0.176611	0.738953	0.911964
C12orf5	578.57	0.00414474	0.194141	0.963634	0.991394
C12orf55	565.787	0.850393	0.73235	0.00359914	0.0986887
C12orf56	61.8984	-0.141671	0.277596	0.00938806	0.157564
C12orf57	3920.65	-0.0664638	0.193671	0.454776	0.772913
C12orf60	94.8227	-0.0621088	0.212311	0.243316	0.610931
C12orf61	23.471	0.302042	0.504889	0.0220989	0.23146
C12orf65	363.107	0.000377	0.187328	0.999286	0.999872
C12orf66	497.258	-0.134698	0.190384	0.232434	0.601204
C12orf73	228.976	-0.100943	0.20879	0.271439	0.63599
C12orf74	35.1096	0.037331	0.211624	0.106405	0.440867
C12orf75	664.937	0.0831641	0.201307	0.35221	0.703399
C12orf76	205.271	0.145905	0.223507	0.179984	0.546068
C12orf79	50.6741	0.0275516	0.20511	0.520442	0.80845
C14orf1	430.025	-0.264664	0.345665	0.0437861	0.304297
C14orf105	265.47	-0.0342898	0.211551	0.0979131	0.425642
C14orf119	1087.57	0.123461	0.172141	0.280221	0.642522
C14orf132	145.973	0.0347929	0.194546	0.642877	0.867609
C14orf142	248.284	-0.0614499	0.162236	0.554156	0.827221
C14orf159	2846.66	0.0774175	0.210904	0.289782	0.652307
C14orf166	5077.84	0.0152268	0.154626	0.8854	0.965928
C14orf169	1514.14	-0.017395	0.145831	0.864915	0.960151
C14orf180	12.9211	0.0149174	0.207661	0.469246	0.781413
C14orf182	70.9237	-0.013813	0.201586	0.765925	0.924769
C14orf183	141.198	0.228492	0.312458	0.0571244	0.340949
C14orf2	1721.24	-0.162375	0.242249	0.140111	0.49259
C14orf28	318.233	0.212759	0.262272	0.0833157	0.402401
C14orf37	232.265	0.113634	0.23268	0.140929	0.494224
C14orf39	23.3205	-0.000966799	0.204391	0.97948	0.996147
C14orf64	96.729	0.0921701	0.231412	0.0565827	0.339976
C14orf79	441.921	-0.0846669	0.22027	0.169071	0.531278
C14orf80	456.879	-0.334623	0.310041	0.0309241	0.264529
C14orf93	591.637	0.0681389	0.182694	0.490621	0.794272
C15orf26	45.2497	-0.291788	0.591938	0.00841457	0.148325
C15orf27	46.5024	0.107138	0.228202	0.167809	0.530446
C15orf37	40.4161	0.0284704	0.195681	0.684525	0.888324
C15orf38	258.665	0.26494	0.318792	0.0497895	0.322664
C15orf39	6192.57	0.0862362	0.182336	0.405328	0.741544
C15orf40	396.739	0.0376179	0.151101	0.719732	0.903623
C15orf41	424.435	-0.172033	0.191031	0.152008	0.510234
C15orf48	199.102	-0.0152198	0.202453	0.727496	0.906958
C15orf52	2299.07	-0.111857	0.226662	0.168808	0.531261
C15orf53	23.4745	0.12638	0.256842	0.0367984	0.281715
C15orf57	405.713	0.372553	0.347367	0.02377	0.239495
C15orf59	80.9274	0.518831	0.842747	0.0101342	0.161851
C15orf61	499.328	-0.031368	0.162894	0.756248	0.91972
C15orf62	37.8855	-0.0409632	0.206455	0.405616	0.741582
C15orf65	146.099	-0.0349453	0.194078	0.634848	0.865047
C16orf13	1135.96	-0.150028	0.194272	0.192102	0.559895
C16orf45	760.31	0.228598	0.269072	0.0753214	0.386475
C16orf46	272.494	-0.0546133	0.195818	0.496762	0.795997
C16orf54	225.651	0.128966	0.258527	0.0291951	0.257818
C16orf58	4047.74	-0.0876447	0.16506	0.412833	0.744563
C16orf59	377.048	-0.174852	0.324255	0.001701	0.0694862
C16orf62	4563.31	0.111896	0.187037	0.304689	0.665564
C16orf70	1477.27	0.0303456	0.198237	0.636332	0.865574
C16orf71	59.5843	0.022849	0.197043	0.723756	0.905685
C16orf72	3573.66	0.114815	0.150496	0.292511	0.655505
C16orf74	105.16	-0.00595844	0.199664	0.900719	0.970946
C16orf80	927.494	-0.0766134	0.201973	0.36288	0.710807
C16orf86	155.411	0.0777045	0.209015	0.308322	0.66971
C16orf87	607.831	0.0403104	0.178788	0.673526	0.882506
C16orf89	219.967	0.044667	0.21261	0.100686	0.431458
C16orf91	337.36	-0.284499	0.252024	0.04587	0.310276
C16orf93	242.235	-0.0530153	0.194009	0.516687	0.805549
C16orf95	110.342	-0.101576	0.197807	0.313862	0.674689
C16orf96	29.6504	0.0182725	0.205772	0.587586	0.843511
C17orf100	66.1433	-0.123251	0.214054	0.225339	0.595407
C17orf104	150.034	-0.0290719	0.209233	0.224647	0.594624
C17orf107	384.631	0.049453	0.182289	0.599153	0.848375
C17orf51	87.1906	0.048997	0.20296	0.453628	0.772265
C17orf53	425.67	-1.09366	0.5394	0.000885814	0.0526665
C17orf58	198.856	-0.0787242	0.206176	0.324768	0.682376
C17orf59	566.4	0.293174	0.343888	0.0406438	0.293363
C17orf62	3361.41	0.106494	0.18416	0.323377	0.68159
C17orf67	367.845	0.207222	0.166142	0.0841519	0.403631
C17orf70	2295.75	-0.219932	0.197539	0.0858564	0.406279
C17orf75	715.357	-0.124639	0.21237	0.220504	0.593421
C17orf80	1497.98	-0.0272799	0.1682	0.781391	0.929462
C17orf82	38.0321	0.00790665	0.200151	0.875495	0.962943
C17orf85	2373.35	0.15683	0.176574	0.18398	0.548927
C17orf89	198.701	-0.596104	0.508685	0.00793853	0.143443
C17orf96	154.747	-0.364626	0.395982	0.0252372	0.243915
C17orf97	1294.76	-0.0678977	0.201106	0.396793	0.734818
C17orf99	11.9151	0.0954085	0.236768	0.0289651	0.256825
C18orf21	964.225	0.0830861	0.186815	0.409873	0.743593
C18orf25	1068.02	0.00186295	0.177362	0.98647	0.997598
C18orf54	467.24	0.17706	0.210614	0.143646	0.49711
C18orf8	2638.6	0.152163	0.218349	0.171977	0.535088
C19orf10	2610.6	-0.173497	0.237217	0.115205	0.454385
C19orf12	1068.74	-0.00523947	0.190201	0.943249	0.986166
C19orf18	80.3186	-0.0459287	0.183131	0.620163	0.858172
C19orf24	993.399	-0.0428185	0.178689	0.649693	0.870367
C19orf25	624.312	0.0569475	0.148095	0.588885	0.843752
C19orf26	231.649	-0.00644959	0.201824	0.885015	0.965928
C19orf33	448.424	-0.0336985	0.209189	0.18777	0.553937
C19orf35	64.8346	0.101383	0.221902	0.202259	0.571788
C19orf38	265.128	0.0586504	0.199419	0.451989	0.77074
C19orf40	198.758	-0.108191	0.229458	0.14683	0.502593
C19orf43	6238.27	0.00631027	0.126839	0.957518	0.9905
C19orf44	1093.98	-0.0888762	0.193201	0.364239	0.711851
C19orf45	82.75	-0.0579705	0.217527	0.025145	0.243803
C19orf47	1456.61	-0.256987	0.354235	0.04052	0.293363
C19orf48	2125.54	-0.213702	0.364124	0.0145956	0.190778
C19orf52	353.283	-0.173816	0.206342	0.151728	0.509917
C19orf53	1737.63	-0.10985	0.150852	0.313732	0.674689
C19orf54	687.871	-0.207517	0.27726	0.0785804	0.392249
C19orf57	212.53	-1.0579	0.458661	0.000581964	0.0417692
C19orf60	1041.56	-0.114825	0.165451	0.299886	0.661082
C19orf66	4427.18	0.00810492	0.194238	0.908716	0.973741
C19orf68	767.2	-0.0357589	0.159318	0.725321	0.906555
C19orf70	809.389	-0.139805	0.199779	0.211751	0.582158
C19orf71	950.865	-0.0734239	0.209022	0.30611	0.667188
C19orf73	50.2507	-0.0433979	0.18783	0.617984	0.857109
C19orf80	151.821	-0.00813034	0.206271	0.743794	0.914638
C19orf82	97.8882	-0.0195335	0.181463	0.826449	0.947544
C19orf83	57.5278	0.0228761	0.189195	0.777274	0.928246
C19orf84	14.3171	0.0225371	0.201618	0.677732	0.884142
C1D	580.936	0.0771981	0.145609	0.475531	0.78534
C1GALT1	2089.21	0.0371472	0.181758	0.687296	0.889422
C1GALT1C1	1540.1	-0.06938	0.175236	0.495157	0.79553
C1orf101	361.769	0.00660795	0.188671	0.933138	0.981981
C1orf105	19.2868	-0.0662444	0.221401	0.0370894	0.283104
C1orf106	1332.56	-0.0839895	0.223413	0.111667	0.449841
C1orf109	347.288	-0.0891694	0.202821	0.324997	0.682698
C1orf110	14.6004	0.0153383	0.208676	0.273383	0.638073
C1orf112	3311	-0.839663	0.290191	0.000179803	0.0226095
C1orf115	331.361	-0.00194777	0.204094	0.954115	0.988964
C1orf116	1873.33	-0.0173461	0.2071	0.392977	0.732486
C1orf122	309.746	-0.0548705	0.18703	0.547219	0.824398
C1orf123	587.556	0.0622789	0.185701	0.513891	0.804013
C1orf127	154.318	0.0349084	0.203949	0.498012	0.795997
C1orf131	859.622	-0.121838	0.183873	0.270779	0.635561
C1orf145	109.739	0.00305993	0.194059	0.966945	0.992904
C1orf159	693.657	-0.109883	0.212085	0.24743	0.614059
C1orf162	1281.23	0.141768	0.266147	0.0397016	0.291768
C1orf167	93.4709	-0.0472111	0.209154	0.289977	0.652448
C1orf168	842.021	-0.00598937	0.206573	0.827905	0.947544
C1orf174	756.82	0.021301	0.169731	0.828618	0.947544
C1orf177	29.5229	-0.0882322	0.214369	0.263116	0.628234
C1orf186	78.1277	0.0043221	0.205536	0.889662	0.966662
C1orf189	52.0903	0.0103814	0.180983	0.907546	0.973097
C1orf194	20.2793	-0.0337139	0.209297	0.320252	0.679384
C1orf198	5903.18	-0.0491998	0.200211	0.476048	0.785366
C1orf204	74.7713	-0.0188331	0.189012	0.811835	0.9418
C1orf21	2921.78	0.0747633	0.205433	0.342043	0.695004
C1orf210	155.02	-0.0360765	0.210231	0.141486	0.494726
C1orf213	78.0308	0.0505279	0.181358	0.599458	0.848463
C1orf216	332.951	-0.014395	0.171531	0.88058	0.964939
C1orf220	113.178	0.00432372	0.194244	0.962047	0.991208
C1orf226	400.565	-0.0978822	0.23482	0.0418085	0.298007
C1orf228	534.295	0.0440938	0.187278	0.617553	0.857109
C1orf233	177.351	-0.0459186	0.204708	0.428112	0.75479
C1orf27	2484.39	-0.122	0.213514	0.218812	0.591543
C1orf35	913.534	-0.155323	0.24757	0.115658	0.455326
C1orf43	5440.22	-0.156874	0.240139	0.134283	0.483245
C1orf50	370.121	0.0259024	0.176366	0.784596	0.931109
C1orf52	909.497	0.0504678	0.172312	0.614172	0.855218
C1orf53	109.591	-0.137046	0.262905	0.0359851	0.279789
C1orf54	545.326	0.0900586	0.21719	0.22413	0.594266
C1orf56	603.305	-0.0520276	0.204171	0.406203	0.74194
C1orf61	22.2543	-0.0659109	0.216771	0.173257	0.537493
C1orf64	65.7806	-0.00202572	0.207268	0.915423	0.976219
C1orf74	267.989	-0.175407	0.269279	0.0853413	0.405591
C1orf85	2300.63	0.00451759	0.183335	0.936327	0.983555
C1orf86	1664.44	-0.0885483	0.162105	0.411976	0.744408
C1orf94	17.2456	0.0147932	0.2074	0.578703	0.839269
C1orf95	182.556	-0.00300461	0.203904	0.931822	0.981568
C1QA	12702	0.0599892	0.211614	0.251074	0.617742
C1QB	18337.2	0.055296	0.209627	0.293115	0.655959
C1QBP	2440.33	-0.115686	0.198976	0.269204	0.633925
C1QC	23419.7	0.0494566	0.205525	0.397714	0.735759
C1QL1	139.388	-0.102004	0.239552	0.0269754	0.250238
C1QL2	236.36	-0.0335753	0.208361	0.337022	0.691667
C1QL4	20.4765	-0.0376434	0.211766	0.0850952	0.405553
C1QTNF1	753.712	-0.0250243	0.187906	0.764883	0.924265
C1QTNF2	90.1721	0.0520902	0.201829	0.451273	0.77022
C1QTNF3	75.2802	-0.0327922	0.18171	0.715512	0.902192
C1QTNF4	29.2567	0.115153	0.228407	0.178177	0.543779
C1QTNF6	825.387	-0.00719484	0.194715	0.905517	0.972247
C1QTNF7	126.751	0.15078	0.289889	0.00393635	0.101856
C1QTNF8	22.349	-0.000626718	0.208258	0.944231	0.986377
C1QTNF9	22.7512	0.00336912	0.201623	0.948715	0.987335
C1QTNF9B-AS1	60.2405	-0.0661253	0.202625	0.397192	0.735277
C1R	23548.5	-0.0199951	0.200846	0.732418	0.909151
C1RL	5009.49	-0.0682146	0.181564	0.475755	0.78534
C1RL-AS1	231.17	0.121676	0.198425	0.25893	0.625786
C1S	34226.3	0.0124442	0.202055	0.790385	0.933245
C2	9189.29	-0.00431908	0.204486	0.884148	0.965836
C20orf166	16.3165	-0.00407764	0.20657	0.861645	0.958955
C20orf166-AS1	13.0781	0.00825028	0.207696	0.500475	0.796894
C20orf194	3029.91	0.419148	0.456356	0.0172009	0.206907
C20orf195	39.4627	0.0339172	0.207063	0.390675	0.73016
C20orf196	100.712	0.145272	0.237846	0.145586	0.500808
C20orf197	32.9488	0.0362541	0.203523	0.510863	0.801941
C20orf203	18.9936	0.0405555	0.209123	0.312286	0.673108
C20orf24	58.5118	-0.0601936	0.195871	0.474501	0.784808
C20orf26	84.1351	-0.0137199	0.204975	0.663822	0.877771
C20orf27	1121.25	-0.046835	0.154588	0.654997	0.873668
C20orf85	28.8258	0.00620848	0.208386	0.587672	0.843511
C20orf96	1030.8	-0.0394019	0.188926	0.635055	0.865099
C21orf119	48.6063	-0.0275683	0.196299	0.681186	0.886609
C21orf128	20.3757	0.00937166	0.207253	0.664021	0.877906
C21orf2	681.34	0.00263742	0.165866	0.981076	0.996147
C21orf33	5582.98	-0.110762	0.217047	0.216943	0.589033
C21orf49	96.2975	0.219366	0.274185	0.0791593	0.393286
C21orf58	604.399	-0.791096	0.372216	0.00133382	0.0639068
C21orf59	2318.69	-0.0916998	0.179335	0.384012	0.725368
C21orf67	76.448	-0.0233382	0.193405	0.755141	0.919136
C21orf90	17.6607	-0.0278133	0.205601	0.491779	0.794272
C21orf91	1181.13	0.112633	0.215468	0.229057	0.598086
C22orf15	21.3049	0.131447	0.262708	0.0285856	0.256331
C22orf23	13.1482	0.0863231	0.220736	0.201854	0.571459
C22orf34	658.281	0.459552	0.563289	0.0136391	0.184882
C22orf39	294.592	0.081143	0.171406	0.432569	0.757533
C22orf46	309.743	0.0176752	0.152444	0.871258	0.962036
C2CD2	1565.49	-0.0285868	0.165233	0.775955	0.927901
C2CD2L	1608.36	0.124382	0.185183	0.264258	0.629377
C2CD3	5977.5	-0.00777528	0.174803	0.930065	0.980749
C2CD4A	13.8436	-0.04754	0.215277	0.00781924	0.142719
C2CD4B	33.8796	0.0123129	0.196267	0.84909	0.953697
C2CD4C	48.381	-0.0430646	0.208217	0.33312	0.68841
C2CD4D	81.2602	-0.0867449	0.221342	0.164419	0.525766
C2CD5	7305.1	-0.0277808	0.178331	0.759839	0.921785
C2orf15	138.003	-0.0302829	0.204629	0.490322	0.794272
C2orf16	22.3842	-0.0601664	0.219085	0.0229427	0.235237
C2orf27A	635.575	0.0166807	0.187719	0.837436	0.950266
C2orf40	71.7614	0.046565	0.213316	0.0702501	0.37375
C2orf42	837.414	0.0293457	0.160274	0.778205	0.928619
C2orf43	839.471	0.0459339	0.175192	0.64148	0.867311
C2orf44	465.12	0.0705138	0.186645	0.46686	0.780049
C2orf47	827.934	-0.0896741	0.183924	0.385939	0.7269
C2orf48	121.274	-1.72058	0.626843	9.13552e-05	0.0149615
C2orf49	1108.2	0.0681774	0.154315	0.536757	0.817593
C2orf50	32.4918	0.0050475	0.204971	0.873828	0.96238
C2orf54	111.694	-0.0684102	0.222872	0.00648241	0.131658
C2orf61	43.3451	0.0624293	0.20477	0.388899	0.728625
C2orf68	1087.69	-0.0120367	0.154823	0.903668	0.972117
C2orf69	1135.07	-0.117585	0.160282	0.292625	0.655505
C2orf70	88.3388	-0.0719072	0.223847	0.011138	0.167834
C2orf72	332.083	-0.0459862	0.212366	0.135708	0.485579
C2orf74	303.069	0.186854	0.265104	0.0927879	0.41694
C2orf76	335.126	0.142431	0.191678	0.214429	0.585154
C2orf81	408.284	0.0613002	0.193144	0.483513	0.790581
C2orf82	66.6337	-0.512497	0.475376	0.0124994	0.178116
C2orf88	63.2683	0.0135046	0.205905	0.645113	0.868624
C3	160986	-0.00825341	0.205063	0.776071	0.927954
C3AR1	1516.67	0.0687212	0.211394	0.263172	0.628237
C3orf14	727.085	-0.134332	0.244702	0.106717	0.441548
C3orf17	2937.56	0.0559738	0.135963	0.595927	0.847193
C3orf18	293.462	0.102895	0.219927	0.214443	0.585154
C3orf20	57.0859	0.0108949	0.198369	0.855411	0.956207
C3orf33	157.66	-0.0308096	0.192377	0.681877	0.887135
C3orf35	153.035	-0.0318511	0.16923	0.755335	0.919168
C3orf38	2198.25	0.114774	0.166908	0.306357	0.667449
C3orf52	333.021	-0.0605623	0.215715	0.12413	0.470099
C3orf55	45.4135	0.0685548	0.219098	0.11316	0.452392
C3orf58	1677.92	-0.0126339	0.198371	0.766245	0.924929
C3orf62	393.508	0.0357493	0.175506	0.711556	0.900115
C3orf67	376.032	-0.0397499	0.208604	0.279251	0.641625
C3orf70	117.657	-0.083294	0.206931	0.315597	0.675876
C3orf80	36.5137	0.0130816	0.205864	0.672222	0.88228
C3P1	460.611	-0.0010187	0.208248	0.96141	0.991208
C4A	9139.38	-1.25027	0.320401	3.38578e-06	0.00179396
C4B	9523.96	-1.38673	0.331069	8.24857e-07	0.00070761
C4BPA	10157.7	-0.0311388	0.210006	0.133011	0.481742
C4BPB	665.978	-0.0177275	0.206473	0.559234	0.830408
C4orf19	235.81	-0.0624301	0.219478	0.0184198	0.213123
C4orf27	1040.77	0.0433055	0.174161	0.657335	0.874651
C4orf29	1770.26	0.0299949	0.167128	0.764455	0.924111
C4orf3	1111.63	0.168713	0.189147	0.159846	0.520258
C4orf32	220.791	0.0860174	0.197651	0.361525	0.709796
C4orf33	354.675	0.253131	0.226349	0.0628629	0.354897
C4orf36	63.0743	-0.109224	0.215753	0.234921	0.603519
C4orf46	267.123	-0.188798	0.180512	0.11947	0.462796
C4orf47	156.209	0.0649447	0.208172	0.330859	0.687062
C4orf48	99.6807	-0.044313	0.199214	0.523	0.809925
C4orf50	117.794	-0.0122214	0.195469	0.8503	0.954164
C5	12305.5	-0.0394768	0.207391	0.356104	0.706758
C5AR1	2303.54	0.12431	0.226796	0.178605	0.544151
C5AR2	392.074	0.0774487	0.212081	0.270831	0.635561
C5orf15	2499.5	0.0597983	0.140675	0.566387	0.834776
C5orf20	134.754	0.0675046	0.220629	0.0504947	0.323757
C5orf22	2222.83	0.0523524	0.129098	0.609025	0.852731
C5orf24	1520.47	-0.0407521	0.157038	0.692885	0.892058
C5orf27	43.9615	-0.0516982	0.215621	0.0724186	0.377495
C5orf28	566.475	0.0291281	0.168488	0.768353	0.925855
C5orf30	680.362	-0.106469	0.236464	0.0747618	0.38459
C5orf34	401.141	-0.230508	0.322156	0.0501679	0.323662
C5orf38	127.969	-0.0678719	0.218441	0.109722	0.446981
C5orf42	10624.3	0.132061	0.19242	0.238871	0.60736
C5orf45	1398.66	-0.00223969	0.170027	0.980889	0.996147
C5orf46	209.545	-0.018412	0.207245	0.41907	0.748138
C5orf49	17.4634	0.0144258	0.207032	0.540936	0.820375
C5orf51	990.471	0.160327	0.152091	0.15661	0.516566
C5orf55	101.545	0.0229312	0.169366	0.818009	0.944159
C5orf56	447.492	0.759023	0.392277	0.00206205	0.0753505
C5orf60	43.3711	-0.074706	0.223369	0.0610123	0.350189
C5orf63	267.899	0.0470521	0.197305	0.529838	0.813599
C5orf66	79.8407	-0.0598301	0.215399	0.138079	0.488608
C6	7672.93	0.009614	0.207493	0.503227	0.798172
C6orf1	632.489	-0.0163435	0.184762	0.843249	0.951962
C6orf106	4341.65	-0.054101	0.183636	0.553561	0.827037
C6orf118	37.6193	-0.00632983	0.205938	0.843397	0.951962
C6orf120	1457.14	0.0463737	0.188097	0.596493	0.84736
C6orf123	31.2976	-0.018942	0.207094	0.486097	0.792017
C6orf132	4032.66	-0.0694944	0.219575	0.0796673	0.394287
C6orf136	995.519	-0.251443	0.224982	0.0619477	0.352283
C6orf141	718.853	-0.0827724	0.227529	0.0286796	0.256583
C6orf163	391.697	0.101054	0.211105	0.263722	0.629098
C6orf164	31.5287	0.0270098	0.192341	0.726351	0.906766
C6orf165	86.3307	-0.0441522	0.201486	0.483276	0.790521
C6orf195	83.8194	-0.0619695	0.213222	0.222318	0.593875
C6orf203	688.794	-0.0239111	0.165607	0.822063	0.94617
C6orf211	1894.69	0.111208	0.159998	0.333142	0.68841
C6orf226	80.0554	0.119992	0.202232	0.259575	0.625786
C6orf229	12.8201	0.00601053	0.207503	0.694626	0.892273
C6orf25	25.2271	0.0435099	0.204051	0.468707	0.781323
C6orf47	789.858	0.0554492	0.181415	0.554217	0.827221
C6orf48	4027.4	0.0371173	0.181225	0.687235	0.889406
C6orf52	81.4215	-0.225883	0.368657	0.0250675	0.243654
C6orf57	272.804	-0.0533513	0.19177	0.532174	0.815412
C6orf62	9813.92	0.0440982	0.180172	0.641516	0.867311
C6orf89	2905.06	0.020951	0.15334	0.84701	0.952976
C6orf99	19.9788	-0.0401511	0.210212	0.228082	0.597908
C7	13968.1	0.0309415	0.209269	0.181819	0.548011
C7orf13	127.469	-0.275096	0.464121	0.017487	0.208022
C7orf25	1014.14	-0.100093	0.150855	0.336012	0.69109
C7orf26	1666.83	0.141805	0.150804	0.195613	0.565073
C7orf31	467.276	0.324983	0.41389	0.0281804	0.254599
C7orf43	1123.07	-0.0709179	0.176725	0.497129	0.795997
C7orf49	1042.49	-0.113644	0.179486	0.299982	0.661082
C7orf50	1242.11	-0.130443	0.188608	0.242704	0.61085
C7orf55	40.8048	0.0972251	0.212304	0.271857	0.636123
C7orf60	895.76	0.0233182	0.18735	0.772768	0.926814
C7orf61	96.1164	0.0277029	0.196663	0.690271	0.891189
C7orf63	511.879	0.0597629	0.184044	0.527699	0.813095
C7orf73	913.649	-0.16237	0.175879	0.166733	0.528871
C8A	3482.69	-0.00685768	0.208196	0.580695	0.840426
C8B	4830.14	-0.00913335	0.20817	0.548997	0.825045
C8G	772.634	-0.120474	0.258932	0.00205502	0.0753505
C8orf31	145.931	0.133192	0.239643	0.136032	0.485946
C8orf33	749.045	-0.0849579	0.196755	0.36393	0.711625
C8orf34	121.269	-0.0521578	0.213822	0.135288	0.484918
C8orf37	196.857	-0.000961142	0.17834	0.988996	0.997997
C8orf4	1095.89	-0.0974363	0.230738	0.0936422	0.418449
C8orf44	152.551	0.154579	0.181921	0.188307	0.55503
C8orf44-SGK3	21.1185	0.066358	0.203434	0.402504	0.739079
C8orf46	72.1226	-0.0777677	0.216849	0.21515	0.585942
C8orf48	36.8439	-0.0175777	0.19804	0.770967	0.926425
C8orf58	436.549	0.103037	0.201252	0.298881	0.6602
C8orf59	1610.65	-0.0299502	0.151882	0.777046	0.928246
C8orf76	208.933	0.0739485	0.181266	0.465183	0.779687
C8orf82	668.899	-0.120781	0.205346	0.248992	0.615391
C8orf88	176.639	0.128039	0.228144	0.173645	0.537772
C9	9002.26	-0.00383642	0.207293	0.793826	0.933966
C9orf106	190.883	-3.77926e-05	0.190033	0.997685	0.999825
C9orf114	1357.54	-0.0919603	0.150896	0.390516	0.730015
C9orf116	113.888	-0.0341125	0.201764	0.549163	0.825118
C9orf117	181.336	0.000639077	0.206347	0.97714	0.996043
C9orf129	478.717	0.0784799	0.200186	0.373644	0.718761
[truncated: 16,017 more rows]

## Sheet: C1D1_vs_week8_hallmark
Supplementary Table 8. The results of gene set enrichment analysis using Hallmark gene sets and the results of paired DE analysis between C1D1 and week 8 performed by fgsea.
pathway	pval	padj	log2err	ES	NES	size	leadingEdge
HALLMARK_ADIPOGENESIS	3.07485e-05	0.000139766	0.557332	-0.549672	-1.81922	187	SLC25A10|DHCR7|SLC19A1|SLC5A6|MDH2|MRPL15|COX7B|NDUFB7|SOWAHC|DDT|SDHC|NDUFA5|UQCRC1|CYC1|ECH1|GRPEL1|HADH|AIFM1|ATL2|COX8A|PIM3|MTCH2|MGST3|ACO2|UQCRQ|NDUFAB1|SOD1|TOB1|GBE1|RETSAT|YWHAG|ESRRA|FAH|POR|ADCY6|COQ9|SLC25A1|COX6A1|ELOVL6|SAMM50|MCCC1|RTN3|CS|DHRS7B|COQ3|PEMT|BCKDHA|CD151|DGAT1|DLAT|AK2|CDKN2C|SUCLG1|ETFB|UBQLN1|UQCR10|ABCB8|PEX14|DLD|PTCD3|UCK1|CHCHD10|PREB|GHITM|LIPE|UQCR11|TALDO1|…
HALLMARK_ALLOGRAFT_REJECTION	4.44031e-12	5.55039e-11	0.887075	0.658173	2.26908	189	CXCL13|IFNG|IL2|SIT1|LCK|ITK|CRTAM|CD2|CD3G|ZAP70|IL7|PTPN6|TGFB1|IL16|JAK2|SOCS1|CCND3|DYRK3|RPS3A|GBP2|LCP2|CD8B|HCLS1|IFNGR2|MAP4K1|ITGAL|CD96|CCR5|FASLG|CSF1|CXCL9|F2R|CXCR3|CD8A|IL18RAP|STAT4|APBB1|NCF4|ELF4|ICOSLG|IL12RB1|TRAT1|HLA-DOB|BCL10|ETS1|HLA-DMA|ST8SIA4|CD3E|RPL9|CD3D|TLR6|SOCS5|STAT1|CCL4|FGR|IL2RG|ACVR2A|PF4|NLRP3|HLA-DOA|HLA-DMB|CD7|PRKCB|GPR65|CD86|CD47|PTPRC|IL12A|PSMB10|IL10|…
HALLMARK_ANDROGEN_RESPONSE	0.401818	0.542998	0.0857844	-0.343487	-1.03755	94	SORD|MAP7|UAP1|CENPN|HOMER2|LMAN1|HMGCS1|XRCC6|RAB4A|HMGCR|IDI1|ACSL3|PDLIM5|DHCR24|B4GALT1|ADRM1
HALLMARK_ANGIOGENESIS	0.807252	0.903704	0.0533478	-0.29251	-0.752472	35	VAV2|APP|LRPAP1|VEGFA|PTK2|TNFRSF21|SPP1
HALLMARK_APICAL_JUNCTION	0.279736	0.411376	0.119888	0.315106	1.08616	188	LAYN|TRAF1|CNN2|AMIGO2|RHOF|TRO|SLIT2|RAC2|CNTN1|VWF|VCAM1|JAM3|EPB41L2|AKT3|LIMA1|ACTB|ZYX|ARPC2|CLDN5|SKAP2|MYL9|STX4|PECAM1|PARD6G|SORBS3|ARHGEF6|CD274|RRAS|ALOX15B|ADAMTS5|CDH11|CD86|CD34|PTPRC|SYK|MAP4K2|ITGA9|CAP1|CD99|TSC1|MMP2
HALLMARK_APICAL_SURFACE	0.516667	0.679825	0.0795565	0.357064	0.978393	41	MDGA1|GHRL|GAS1
HALLMARK_APOPTOSIS	0.125786	0.208019	0.181383	0.35057	1.1935	158	CD2|RNASEL|LEF1|EGR3|CYLD|CASP8|ROCK1|BIRC3|MADD|FEZ1|BNIP3L|PDGFRB|DCN|CASP9|IRF1|BMF|TXNIP|GUCY2D|FASLG|GSTM1|F2R|GSN|BCL10|CASP4|PPT1|CASP7|TIMP2|CD69|LGALS3|LUM|DDIT3|CD44|CASP3|MMP2|CAV1|CFLAR|NEDD9|PPP2R5B|IL18|GPX3|PDCD4|HGF|FAS|CASP1|ISG20|PLCB2
HALLMARK_BILE_ACID_METABOLISM	0.942379	0.972921	0.0450443	-0.230639	-0.704849	110	NUDT12|ISOC1|SOD1|RETSAT|PXMP2|IDH2|IDI1|FDXR|PEX1|PEX13|DHCR24|PRDX5|PEX19|SLC35B2|PEX11G|LIPE|FADS2|SLC27A5|ALDH9A1|FADS1|SLC23A1|PHYH|GNPAT|SULT2B1|RBP1|BBOX1|GCLM|IDH1|TFCP2L1|PEX6
HALLMARK_CHOLESTEROL_HOMEOSTASIS	1.85186e-05	9.25931e-05	0.57561	-0.710696	-2.05928	73	CBS|DHCR7|TMEM97|FASN|CYP51A1|EBP|ERRFI1|LDLR|FDPS|MVK|PMVK|ECH1|NSDHL|SREBF2|GUSB|HMGCS1|HSD17B7|TRIB3|HMGCR|IDI1|FDFT1|PCYT2|TM7SF2
HALLMARK_COAGULATION	0.0131398	0.0298632	0.38073	-0.475469	-1.50252	135	MMP3|CTSV|CFB|TFPI2|DUSP14|GNB2
HALLMARK_COMPLEMENT	0.0241871	0.0503898	0.352488	0.388008	1.34276	194	GZMK|LCK|RASGRP1|SPOCK2|CBLB|ZEB1|JAK2|DYRK2|ZFPM2|ERAP2|XPNPEP1|TNFAIP3|PRKCD|AKAP10|LTA4H|LCP2|CASP9|FYN|IRF1|DGKH|RHOG|APOBEC3G|APOBEC3F|KIF2A|STX4|PSMB9|GNG2|PLA2G4A|PIK3CG|EHD1|PHEX|DOCK10|PRCP|IRF2|CASP4|CR1|CASP7|TIMP2|GCA|PIK3R5|ANXA5|PIK3CA|KCNIP2|USP15|LGALS3
HALLMARK_DNA_REPAIR	0.000111256	0.000463569	0.538434	-0.572874	-1.84639	147	ZWINT|RAD51|POLD1|ARL6IP1|POLR2I|SAC3D1|UMPS|PCNA|POLR2F|RFC2|LIG1|SEC61A1|POLR2J|MPC2|NME4|RFC3|SNAPC4|PNP|COX17|NUDT9|BCAP31|NME1|POM121|POLR2H|RFC4|FEN1|TYMS|ADCY6|HPRT1|ERCC2|POLD3|CANT1|EDF1|TMED2|GTF3C5|RPA3|NT5C|SUPT5H|POLR2D|AK1|NELFCD|POLA2|POLH|TAF6|VPS37D|ALYREF|ADRM1|POLR1C|DAD1|POLR2K|RFC5|DGCR8|RBX1|NELFE|NCBP2|PDE4B
HALLMARK_E2F_TARGETS	9.30502e-25	4.65251e-23	1.2871	-0.800528	-2.65401	194	TK1|SPC24|DIAPH3|MELK|KIF4A|E2F8|CKS1B|TRIP13|ESPL1|CDC25A|GINS1|ASF1B|CCNE1|CIT|CDK1|AURKB|RRM2|CKS2|SPC25|STMN1|AURKA|CTPS1|KPNA2|ATAD2|PLK4|POLD2|RNASEH2A|POLD1|RACGAP1|POP7|CHEK2|PSMC3IP|BRCA1|TIMELESS|DSCC1|MAD2L1|TACC3|TCF19|TUBG1|EZH2|PCNA|TUBB|BRCA2|PTTG1|CDCA8|PRDX4|RFC2|KIF22|CHEK1|TBRG4|POLE|DONSON|LIG1|BIRC5|CENPE|ORC6|MXD3|NUP205|CDKN3|MCM3|TFRC|KIF2C|RANBP1|HMMR|UBE2T|BUB1B|UNG|SMC4…
HALLMARK_EPITHELIAL_MESENCHYMAL_TRANSITION	0.67666	0.825195	0.0672065	0.26337	0.914162	196	GEM|VIM|TGFB1|WIPF1|SGCD|LAMA2|SLIT2|VEGFC|SLIT3|BASP1|GLIPR1|PMP22|VCAM1|GAS1|EFEMP2|TNFAIP3|PDGFRB|DCN|LOXL1|ABI3BP|MYL9|DAB2
HALLMARK_ESTROGEN_RESPONSE_EARLY	0.128972	0.208019	0.168238	-0.366786	-1.21601	194	DHCR7|FASN|RHOD|FRK|SLC7A2|SLC19A2|SEC14L2|FARP1|AKAP1|TSKU|FLNB|PPIF|TOB1|HES1|IL17RB|KAZN|LAD1|PODXL|CANT1|FDFT1|SLC7A5|PDZK1|SLC16A1|ISG20L2|TPD52L1|B4GALT1|DHRS2|SYBU|MYC|BAG1|CELSR2|NXT1|NAV2|CLDN7|WWC1|SYT12|NADSYN1|P2RY2|ZNF185|RRP12|TBC1D30|ESRP2|RBBP8|TMPRSS3|SLC22A5
HALLMARK_ESTROGEN_RESPONSE_LATE	2.16124e-06	1.20069e-05	0.627257	-0.57925	-1.9204	194	ASCL1|DHCR7|SORD|TRIM29|LSR|CDC6|FRK|LLGL2|PLXNB1|TFPI2|IMPA2|CA2|STIL|CDH1|XRCC3|PLK4|RNASEH2A|FARP1|ST14|FLNB|KIF20A|CKB|HOMER2|TOP2A|PPIF|TOB1
HALLMARK_FATTY_ACID_METABOLISM	0.000138506	0.000532716	0.518848	-0.566383	-1.82111	149	FASN|FH|CA2|MDH2|PRDX6|ECI1|SDHC|HSD17B10|BPHL|NCAPH2|ECH1|GCDH|HADH|NSDHL|ACO2|LDHA|ENO3|HMGCS1|RETSAT|HSD17B7|IDH3B|MIF|PDHA1|NTHL1|IDI1|ACADVL|UGDH|HSP90AA1|RDH11|TP53INP2|CBR3|PTS|SUCLG1|DHCR24|DLD|CBR1|MDH1|UROS|CPOX|ACAT2|APEX1|REEP6|IDH3G|ADIPOR2|EHHADH|CPT1A|SDHA|YWHAH|ALDH9A1|GSTZ1|ADSL|SLC22A5|PCBD1|HCCS|SUCLA2|ODC1|DECR1|HSDL2|GRHPR|AUH|DLST|IDH1|METAP1|GLUL|AADAT|ETFDH|EPHX1
HALLMARK_G2M_CHECKPOINT	2.16945e-16	5.42363e-15	1.04763	-0.735089	-2.42899	189	KIF4A|E2F1|CKS1B|UBE2C|ESPL1|CDC25A|CENPA|CDC6|CDK1|TPX2|AURKB|KIF11|POLQ|CKS2|STMN1|E2F2|AURKA|KPNA2|KIF15|STIL|TRAIP|NUSAP1|PLK4|FANCC|RACGAP1|CHAF1A|MAD2L1|TACC3|EZH2|KIF20B|FBXO5|BRCA2|DTYMK|PTTG1|KIF22|CHEK1|POLE|BIRC5|CENPE|ORC6|CDKN3|MCM3|CCNA2|BUB1|RAD23B|KIF2C|PBK|HMMR|CCNF|SMC4|NDC80|TOP2A|CCNB2|PRC1|SUV39H1|BARD1|CDC45|LMNB1|ILF3|TNPO2|TTK|PLK1|SLC12A2|TFDP1|UCK2|CDC7|WRN|CENPF|NCL|MCM…
HALLMARK_GLYCOLYSIS	7.4387e-07	5.31336e-06	0.659444	-0.588383	-1.94899	195	SLC25A10|CENPA|CDK1|ABCB6|PC|STMN1|AURKA|ALDH7A1|MDH2|GOT1|HSPA5|PPIA|PSMC4|SDHC|TXN|KIF20A|NSDHL|LDHA|HMMR|FAM162A|PAXIP1|PPP2CB|GUSB|CLN6|SOD1|SLC25A13|PKP2|GLCE|SLC37A4|DEPDC1|MIF|GMPPB|GFPT1|COPB2|QSOX1|EXT1|SRD5A3|VEGFA|HS6ST2|HAX1|PHKA2|B4GALT2|GPC1|CASP6|DSC2|TPI1|ENO1|SDC2|B4GALT1|DLD|MDH1|AK4|POLR3K|B4GALT4|SDC1|PGK1|KDELR3|CYB5A|TALDO1|PMM2|NASP|ANGPTL4|CLDN9|NOL3
HALLMARK_HEDGEHOG_SIGNALING	0.868321	0.943827	0.0499914	-0.274286	-0.705589	35	TLE1|CNTFR|PTCH1|VEGFA|L1CAM|ETS2|NF1|NKX6-1
HALLMARK_HEME_METABOLISM	0.362963	0.518519	0.0925529	-0.32112	-1.05464	183	ABCB6|PC|PRDX2|XK|HDGF|CA2|E2F2|RHCE|HMBS|FN3K|RAD23A|TFRC|MGST3|SMOX|SLC25A37|SLC6A8|MINPP1|GLRX5|MAP2K3|TFDP2|GMPS|UBAC1|ISCA1|EIF2AK1|DCAF10|MOCOS|RCL1|PPOX
HALLMARK_HYPOXIA	0.669604	0.825195	0.0691198	0.264748	0.912579	188	IDS|SLC6A6|CHST2|RBPJ|DTNA|CXCR4|NEDD4L|XPNPEP1|ATP7A|TNFAIP3|NDST2|BNIP3L|ZNF292|DCN|PPP1R15A|NAGK|PFKFB3|KIF5A|KLF7|PNRC1|LXN|SLC2A5|ETS1|BCL2|MXI1|CDKN1C|PDK1|NR3C1|AMPD3|PGF|WSB1|AKAP12|DDIT3|GPC4|HK1|TIPARP|CAV1|MAP3K1
HALLMARK_IL2_STAT5_SIGNALING	0.0109184	0.0270767	0.38073	0.406316	1.40612	194	RHOH|TRAF1|CTLA4|ICOS|SYT11|FLT3LG|SWAP70|PLAGL1|SOCS1|CDC42SE2|CCND3|NCOA3|AHNAK|RABGAP1L|DENND5A|PRKCH|TNFRSF8|TTC39B|IKZF4|HOPX|ADAM19|MAP6|TWSG1|MYO1E|GLIPR2|BATF|CCR4|TNFRSF4|CSF1|ARL4A|ITIH5|PTGER2|SERPINB6|BCL2|GBP4|CST7|PHTF2|CDKN1C|P2RX4|LRRC8C|IL10RA|GPR65|CD86|TNFRSF1B|CD48|IL10|CD44|MAP3K8|GATA1|ITGAE|CASP3|IL4R|IL2RB|SLC2A3|CD79B|EOMES|IRF8|IL3RA|SOCS2|SNX14|TNFRSF9
HALLMARK_IL6_JAK_STAT3_SIGNALING	0.00100959	0.00360569	0.45506	0.577149	1.77874	85	CXCL13|IL7|TGFB1|SOCS1|ACVRL1|STAM2|IFNGR2|IRF1|PTPN1|CSF1|CXCL9|IL17RA|IL10RB|IL12RB1|STAT1|IL2RG|PF4|PIK3R5|BAK1|TNFRSF1B|ITGA4|PTPN2|CD44|MAP3K8|CSF3R|IL4R|CSF2RB|CSF2RA|FAS|IL3RA|IL9R|TNFRSF1A|GRB2|CBL|PDGFC|PIM1|IL18R1|IFNAR1|TNF|STAT2|LTB|CD38|IL2RA|EBI3|IRF9|IFNGR1
HALLMARK_INFLAMMATORY_RESPONSE	0.00579925	0.016109	0.407018	0.427162	1.47664	193	CXCR6|LCK|RASGRP1|CD70|BEST1|LPAR1|SEMA4D|CHST2|PTPRE|CD82|NOD2|LCP2|TNFSF9|IFNGR2|IRF1|RHOG|CALCRL|SLAMF1|CSF1|CXCL9|GPR132|PTGER4|IL18RAP|PTGER2|ICOSLG|CCRL2|KCNA3|CMKLR1|PTGIR|CCR7|AXL|P2RX4|ACVR2A|CD69|NLRP3|PIK3R5|IL10RA|TNFRSF1B|RNF144B|CD48|ATP2B1|IL10|C5AR1|CD40|GPR183|CSF3R|IL4R|IL2RB|TNFSF15|TACR1|IL15|IL18|TLR3|HAS2|NMI|PDPN|TNFRSF9|MEP1A|ABI1|IL7R|F3|RGS1|MMP14|ICAM4|CCL2|IL18R1|IFNAR…
HALLMARK_INTERFERON_ALPHA_RESPONSE	0.243902	0.369549	0.130106	0.36244	1.13966	95	IL7|SP110|CASP8|ELF1|LPAR6|SAMD9|GBP2|TRIM21|IRF1|TXNIP|TRAFD1|UBA7|CSF1|PSMB9|UBE2L6|CCRL2|SAMD9L|IRF2|GBP4|CD47|IL4R|NUB1|IL15|DDX60|NMI|CASP1|ISG20|OGFR|CD74|B2M|PARP14|PSME1|TAP1|NCOA7|PSMB8|STAT2|SELL
HALLMARK_INTERFERON_GAMMA_RESPONSE	0.0113722	0.0270767	0.38073	0.404299	1.40663	198	SSPN|IL7|PTPN6|JAK2|SOCS1|RAPGEF6|NCOA3|SP110|CASP8|NOD1|VCAM1|NLRC5|TNFAIP3|LCP2|IDO1|CIITA|TRIM21|ARID5B|IRF1|TXNIP|TRAFD1|PTPN1|CXCL9|PTGS2|MVP|STAT4|PSMB9|ARL4A|PLA2G4A|CD274|UBE2L6|ZNFX1|SAMD9L|IRF2|CASP4|HLA-DMA|GBP4|ST8SIA4|CMKLR1|CASP7|STAT1|LYSMD2|IL18BP|CD69|IRF5|P2RY14|IL10RA|CD86|ST3GAL5|PTPN2|SAMHD1|LATS2|PSMB10|BANK1|CD40|GPR18|KLRK1|CASP3|IL4R|IL2RB|CSF2RB|IL15|DDX60|FAS|IRF8|NMI|E…
HALLMARK_KRAS_SIGNALING_DN	0.0431881	0.079978	0.321776	0.395351	1.34509	166	CPB1|IFNG|SIDT1|PDCD1|NRIP2|SLC29A3|PLAG1|CHST2|KCND1
HALLMARK_KRAS_SIGNALING_UP	0.239411	0.369549	0.118288	-0.342676	-1.13292	190	PLEK2|CFB|USH1C|MAP7|CA2|F2RL1|TOR1AIP2|SCG5|AKT2|DCBLD2
HALLMARK_MITOTIC_SPINDLE	0.00329539	0.00969232	0.431708	-0.456399	-1.51601	198	ANLN|KIF4A|ESPL1|ECT2|CDK1|TPX2|KIF11|AURKA|KIF15|NUSAP1|RACGAP1|FARP1|SAC3D1|PIF1|KIF20B|FBXO5|BRCA2|KIF22|FLNB|BIRC5|CENPE|BUB1|KIF2C|YWHAE|WASL|SMC4|NDC80|TOP2A|SASS6|DLGAP5|CEP72|CCNB2|PRC1|LMNB1|KNTC1|CENPJ|TTK|NET1|PLK1|ACTN4|CENPF|TBCD|INCENP|PCNT|CDK5RAP2
HALLMARK_MTORC1_SIGNALING	2.04973e-08	1.70811e-07	0.733762	-0.626452	-2.07509	195	DHCR7|TMEM97|SORD|CDC25A|CYP51A1|EBP|RRM2|LDLR|AURKA|RPN1|GOT1|CALR|HSPA5|TUBG1|PSPH|HSP90B1|PPIA|HSPA9|HMBS|PSMC4|ACACA|NUP205|TFRC|SDF2L1|BUB1|LDHA|CCNF|UNG|PSMB5|RRP9|UCHL5|PDAP1|MCM4|HSPD1|PNP|GPI|MTHFD2L|CANX|PSMG1|GBE1|HMGCS1|PSMD14|PLK1|SHMT2|TOMM40|POLR3G|MAP2K3|SLC37A4|TRIB3|NAMPT|PNO1|HPRT1|PSMD12|ELOVL6|PHGDH|MCM2|GMPS|HMGCR|IDI1|DHFR|PPA1|FDXR|NFKBIB|FKBP2|RDH11|TM7SF2|COPS5|SLC7A5|PS…
HALLMARK_MYC_TARGETS_V1	3.50146e-13	5.83577e-12	0.932595	-0.704259	-2.33464	193	HDGF|CTPS1|KPNA2|POLD2|MAD2L1|AIMP2|PCNA|PPIA|PHB|PSMC4|PRDX4|PSMD8|CYC1|SRPK1|CDK2|EIF3B|CCNA2|ILF2|RAD23B|LDHA|RANBP1|TUFM|COX5A|YWHAE|GNL3|RUVBL2|EIF1AX|VDAC1|GLO1|RRP9|SNRPA|CCT7|NDUFAB1|MCM4|HSPD1|CDC45|NHP2|CANX|SRM|NOP16|EIF2S1|PSMA2|NME1|PSMD14|YWHAQ|XRCC6|TFDP1|MCM7|SSBP1|SNRPG|DEK|CBX3|RFC4|MCM5|TYMS|U2AF1|MRPL9|HPRT1|PSMD3|MRPL23|MCM2|CCT3|XPOT|FBL|HNRNPA2B1|PSMB2|PABPC1|EIF4H|PSMA7|CA…
HALLMARK_MYC_TARGETS_V2	1.65205e-06	1.03253e-05	0.643552	-0.767593	-2.1499	58	TMEM97|SORD|SLC19A1|PLK4|AIMP2|PHB|TBRG4|FARSA|RABEPK|GNL3|UNG|RRP9|MCM4|HSPD1|SRM|NOP16|PLK1|IPO4|TFB2M|LAS1L|GRWD1|CBX3|MCM5|IMP4|PPAN|PES1|BYSL|EXOSC5|NDUFAF4|RCL1|DCTPP1|WDR74|NOLC1|WDR43|HSPE1|MYC|MRTO4|TCOF1|NOC4L|NOP56|PRMT3
HALLMARK_MYOGENESIS	0.9606	0.972921	0.0445962	-0.222327	-0.736449	195	TNNI2|PC|FDPS|ATP2A1|AKT2|APP|CKB|PICK1|ENO3|SLC6A8
HALLMARK_NOTCH_SIGNALING	0.764463	0.903704	0.0596037	0.296955	0.777978	32	ARRB1|DLL1|NOTCH2|FBXW11|LFNG|JAG1|FZD7|HEYL|MAML2
HALLMARK_OXIDATIVE_PHOSPHORYLATION	7.66815e-12	7.66815e-11	0.875325	-0.688424	-2.26586	184	FH|ATP1B1|MDH2|MRPL15|NDUFS2|CYCS|COX6B1|MRPS12|NDUFA7|NDUFA6|COX7B|POLR2F|NDUFB7|TIMM50|ECI1|HSPA9|NDUFA1|TIMM17A|SLC25A5|SDHC|HSD17B10|NDUFS6|UQCRFS1|NDUFA5|PMPCA|NDUFA4|UQCRC1|CYC1|TIMM13|ECH1|GRPEL1|NDUFV1|AIFM1|COX8A|NDUFA8|NDUFB2|COX7A2|MGST3|ACO2|LDHA|TOMM22|COX5A|COX5B|UQCRQ|OAT|VDAC1|NDUFAB1|NDUFB6|NDUFB3|NDUFS1|GPI|SLC25A4|COX17|TIMM10|RETSAT|MRPS22|ABCB7|POR|IDH3B|PDHA1|COX6A1|MRPL34|I…
HALLMARK_P53_PATHWAY	0.398693	0.542998	0.096563	0.296957	1.02546	192	TGFB1|DGKA|SOCS1|CGRRF1|CCND3|TSPYL2|RALGDS|ADA|DEF6|CDKN2AIP|APAF1|PTPRE|ISCU|CD82|RNF19B|PRMT2|TNFSF9|WWP1|PPP1R15A|ZMAT3|TXNIP|TRAFD1|NINJ1|DRAM1|F2R|ANKRA2|GM2A|PHLDA3|ALOX15B
HALLMARK_PANCREAS_BETA_CELLS	0.941057	0.972921	0.0491928	0.238083	0.601121	27	STXBP1|AKT3
HALLMARK_PEROXISOME	0.0659341	0.113679	0.237794	-0.445657	-1.35272	103	CTPS1|FDPS|ECH1|FIS1|SLC25A17|TOP2A|ISOC1|CLN6|SOD1|SLC25A4|RETSAT|IDE|SLC25A19|IDH2|IDI1|PABPC1|RDH11|HRAS|PEX13|DHCR24|PRDX5|PEX14|CRABP2|SMARCC1|SLC35B2|HSD11B2|EHHADH|PEX5|YWHAH|ALDH9A1|FADS1|ERCC1|CADM1|CNBP
HALLMARK_PI3K_AKT_MTOR_SIGNALING	0.624329	0.800422	0.0623861	-0.300292	-0.914112	100	E2F1|CDK1|PRKAA2|CALR|HSP90B1|ACACA|CDK2|PIN1|MAP2K3|PLCB1|ECSIT|TRIB3|ARF1|PLA2G12A|PAK4|NFKBIB|AP2M1|AKT1S1|CSNK2B|HRAS
HALLMARK_PROTEIN_SECRETION	0.813333	0.903704	0.0601186	0.256551	0.802644	93	SSPN|SNAP23|SNX2|ATP7A|STX16|STX7|RAB9A|AP3B1|GALC|PPT1|AP3S1|GOSR2|RAB22A|ADAM10|ARFGEF2|CTSC|MON2|VPS4B|TMX1|SCAMP1|SEC24D|VAMP3|CLN5|STX12|VAMP4|VAMP7|CD63
HALLMARK_REACTIVE_OXYGEN_SPECIES_PATHWAY	0.0175255	0.038099	0.352488	-0.599277	-1.61136	46	PRDX2|NDUFS2|PRDX6|NDUFA6|PRDX4|TXN|SOD1|ERCC2|NDUFB4|TXNRD2|SRXN1|CDKN2D|LAMTOR5
HALLMARK_SPERMATOGENESIS	0.0382651	0.0749134	0.321776	-0.467669	-1.42351	101	MAP7|CDK1|AURKA|EZH2|CLPB|ZC2HC1C|SCG5|CNIH2|CDKN3|NCAPH|BUB1|KIF2C|CCNB2|PSMG1|TTK|SLC12A2|RFC4|RPL39L|HSPA4L|PARP2|IDE|DBF4|HSPA2|NEK2
HALLMARK_TGF_BETA_SIGNALING	0.808824	0.903704	0.0577309	0.269623	0.780691	54	TGFB1|PPP1R15A|IFNGR2|APC|CDK9|BCAR3|CDKN1C|ACVR1|SMURF2|FKBP1A|ENG|MAP3K7|TRIM33|TGFBR1|SMAD7|RAB31|UBE2D3|KLF10|SKI|XIAP|SMAD3
HALLMARK_TNFA_SIGNALING_VIA_NFKB	0.038955	0.0749134	0.321776	0.383992	1.33349	197	EGR2|TRAF1|BCL2A1|TNFAIP8|GEM|EGR3|LITAF|BIRC3|DENND5A|PTPRE|TNFAIP3|RNF19B|TNFSF9|SNN|PPP1R15A|IFNGR2|IRF1|FUT4|MSC|NINJ1|DRAM1|NFAT5|CSF1|PFKFB3|PNRC1|PTGS2|PTGER4|STAT5A|EHD1|ICOSLG|CCRL2|CCL4|CD69|MARCKS|REL|ATP2B1|DNAJB4|CD44|MAP3K8|TANK|GPR183|TIPARP|KLF2|TSC22D1|CD80|SLC2A3|CFLAR|PLEK|IL18
HALLMARK_UNFOLDED_PROTEIN_RESPONSE	0.00155035	0.00516783	0.45506	-0.553949	-1.68619	106	CKS1B|CALR|LSM4|EIF4G1|CEBPG|HSPA5|HSP90B1|SRPRB|HSPA9|PDIA6|HYOU1|EIF4EBP1|PDIA5|IFIT1|KHSRP|RRP9|EIF4A3|NHP2|EIF2S1|TUBB2A|POP4|XPOT|EXOSC5|CHAC1|YIF1A|VEGFA|SLC7A5|EXOSC2|NOP14|BAG3|MTHFD2|EXOSC4|DKC1|NOLC1|PAIP1|LSM1|PREB|BANF1|CEBPB|KDELR3|NOP56|DDX10|GEMIN4
HALLMARK_UV_RESPONSE_DN	0.0592105	0.105733	0.276501	0.388872	1.29497	138	KCNMA1|LPAR1|CACNA1A|RASA2|TGFBR2|ADD3|MAGI2|PMP22|ATXN1|NIPBL|PRKCE|PRDM2|AKT3|PDGFRB|AMPH|INPP4B|FYN|AGGF1|GRK5|DAB2|SYNE1|CELF2|FZD2|PIK3CD|NR3C1|ACVR2A|CDK13|MGLL|MAP2K5|PTPRM|DLC1|ATP2B1|NOTCH2|SCAF8|SNAI2|CAV1|ATP2B4|IGFBP5|MMP16|RBPMS|HAS2
HALLMARK_UV_RESPONSE_UP	0.00765043	0.0201327	0.407018	-0.485514	-1.56751	152	CTSV|IGFBP2|CCNE1|TYRO3|CA2|SIGMAR1|RPN1|CLTB|CEBPG|GRPEL1|CDK2|TFRC|DNAJA1|PSMC3|HYAL2|PDAP1|PPIF|SLC25A4|SLC6A8|AP2S1|POLR2H|RFC4|FEN1|CHRNA5|PARP2|MRPL23|HSPA2|RHOB|POLE3|DGAT1|GGH
HALLMARK_WNT_BETA_CATENIN_SIGNALING	0.972921	0.972921	0.0454059	-0.233762	-0.605982	40	NCSTN|PTCH1|NOTCH1|SKP2|CSNK1E|MYC|FZD1|HDAC2|WNT5B|WNT6|TP53|DKK1|CTNNB1|GNAI1|AXIN1
HALLMARK_XENOBIOTIC_METABOLISM	0.00198155	0.00619234	0.431708	-0.486025	-1.6097	191	TMEM97|CFB|PC|CA2|PGRMC1|AHCY|DDT|BPHL|ECH1|ACO2|SMOX|LONP1|ARG2|RETSAT|SHMT2|HGFAC|FAH|POR|HPRT1|GART|PEMT|UGDH|SLC35B1|ACP1|JUP|ASL|PTS|PMM1|CASP6|PDLIM5|CYP26A1|HES6|CBR1|SAR1B|CYB5A|MTHFD1|DCXR|SPINT2|DHPS|MT2A|ETS2|PYCR1|ALDH9A1|SSR3|BCAR1
