# Supplementary material for: Sequencing analysis reveals evidence of immune activation in advanced HER2 negative breast cancer responders treated with entinostat + nivolumab + ipilimumab
Source: Research Square preprint supplement (doi:10.21203/rs.3.rs-6580687/v1), 2025-06-09
Supplement: Supplementary file 3 [file 47dbf387bb99d498605531a4.xlsx]

## Sheet: CIBERSORT_proportions
Supplementary Table 16. 22 cell type proportions estimated by CIBERSORTx.
Sample	B.cells.naive	B.cells.memory	Plasma.cells	T.cells.CD8	T.cells.CD4.naive	T.cells.CD4.memory.resting	T.cells.CD4.memory.activated	T.cells.follicular.helper	T.cells.regulatory..Tregs.	T.cells.gamma.delta	NK.cells.resting	NK.cells.activated	Monocytes	Macrophages.M0	Macrophages.M1	Macrophages.M2	Dendritic.cells.resting	Dendritic.cells.activated	Mast.cells.resting	Mast.cells.activated	Eosinophils	Neutrophils
R-18_Baseline	0.0618032	0	0.0189343	0.015323	0	0.0679348	0	0.0217701	0.020111	0	0.0274591	0.00149454	0.00359349	0.324205	0.051729	0.279324	0	0	0.106318	0	0	0
R-5_Baseline	0.00248857	0	0.00376418	0	0	0.151649	0.00365308	0.039046	0.0589664	0	0.0402017	0	0	0.51432	0.0411731	0.136116	0	0	0.00862166	0	0	0
R-5_Post Run-in	0.0166997	0	0.0124739	0	0	0.209585	0.0471284	0.0991254	0.00744851	0	0.0554001	0.00973993	0.00713588	0.232101	0.0515244	0.113701	0	0.1067	0.0312365	0	0	0
R-12_Baseline	0.0305298	0	0.00823138	0	0	0.135467	0.0127635	0.024973	0.0173488	0	0.0182283	0	0.0730699	0.189227	0.023573	0.382464	0	0	0.0783871	0	0	0.00573723
R-12_Post Run-in	0.0629272	0	0.0194361	0	0	0.111906	0	0.0457971	0.00102198	0	0	0.0122149	0.0600678	0.235326	0.0353483	0.331755	0	0	0.0753261	0	0	0.00887308
R-19_Post Run-in	0.0522719	0	0.00909153	0	0	0.110329	0	0.0741427	0.0198176	0	0.0345949	1.31707e-05	0.0581638	0.261638	0.0521622	0.260597	0	0	0.051117	0	0.0103575	0.00570309
R-20_Baseline	0.00903737	0.0047852	0	0	0	0.132259	0	0.0153481	0.00435121	0	0.0146124	0.020768	0.057552	0.0849405	0.0343753	0.208302	0	0.0332564	0.379853	0	0	0.000560572
R-20_Post Run-in	0.0250284	0.00458753	0	0	0.0208107	0.127795	0	0.0001502	0.0140395	0	0.00988729	0.0241329	0.0396758	0.0448424	0.0117498	0.246169	0.0491036	0.027238	0.35479	0	0	0
R-2_Baseline	0.028781	0.0766475	0.0264952	0	0	0.179705	0.0101123	0.0509521	0.011594	0	0.0522865	0.0403477	0.00593451	0.229649	0.0977387	0.129489	0	0	0.0602678	0	0	0
R-2_Post Run-in	0.0290214	0.0920537	0.00786051	0	0	0.19389	0.0257094	0.0642607	0.0136464	0	0.090938	0	0.00946462	0.215514	0.117621	0.104393	0	0	0.0356269	0	0	0
R-18_Post Run-in	0	0.0103591	0.0222725	0.0224989	0	0.0955766	0	0.1131	0.00629221	0	0.0622936	0.00435864	0.0338026	0.354348	0.0529103	0.133139	0	0	0.089048	0	0	0
R-2_Week 8	0.14704	0.175513	0	0	0	0.167637	0.0470012	0.0791033	0.0311854	0.0370536	0.0297032	0	9.60894e-05	0.0957692	0.0796674	0.0968172	0	0	0.0134129	0	0	0
R-14_Baseline	0.116929	0.181419	0	0.007751	0	0.160102	0.0103938	0.103194	0.0115094	0	0.0163737	0.0140238	0.0320184	0.169978	0.0761484	0.0746293	0	0	0.0255303	0	0	0
R-14_Post Run-in	0.0450189	0.147813	0.0639474	0	0	0.115109	0.0255543	0.0597047	0.00648181	0	0.0198145	0.00357534	0.0466358	0.232473	0.0916502	0.105761	0	0	0.0364605	0	0	0
R-6_Baseline	0.05075	0	0.00217749	0	0	0.106303	0	0.0687612	0.0225507	0	0.0197131	0.0142768	0.0638903	0.202395	0.0434469	0.362134	0	0	0.0436018	0	0	0
R-6_Post Run-in	0.039664	0	0.00132736	0	0	0.129356	0	0.080603	0.00700843	0	0.035041	0.00694359	0.0940332	0.105064	0.0462494	0.392476	0	0.00926164	0.0529729	0	0	0
R-6_Week 8	0.00736375	0	0.00215294	0.033023	0	0.145349	0.0269788	0.0739916	0.0252046	0	0.0501651	0	0.0249209	0.153259	0.0881933	0.333909	0	0	0.0354888	0	0	0
R-8_Baseline	0.00928334	0	0.0628706	0	0	0.176257	0.00390714	0.0548144	0.0139525	0	0.00909363	0.031828	0.0677567	0.282026	0.0517094	0.146773	0	0.0478628	0.0418649	0	0	0
R-8_Post Run-in	0.0494787	0	0.0587508	0	0	0.16758	0.00920323	0.0542793	0.0209026	0	0.0341811	0.0139099	0.0475308	0.209274	0.0724567	0.135364	0.00251822	0.0359116	0.0886584	0	0	0
R-17_Baseline	0.00454779	0.0212262	0	0	0	0.220994	0	0.0140054	0	0	0.039958	0.00577158	0.0694704	0.241152	0.0238957	0.279416	0.00938389	0.0134268	0.0567519	0	0	0
R-17_Post Run-in	0.00403872	0.0279933	0	0.00468112	0	0.207547	0	0.0170369	0	0	0.0490868	0	0.0612155	0.239862	0.0491213	0.24812	0.0140196	0	0.0772784	0	0	0
R-23_Week 8	0.0182986	0	0.0401431	0.000898989	0.00190434	0.0611484	0	0.0203454	0.00262149	0	0.0373929	0	0.107121	0.227124	0.0215974	0.347308	0	0	0.101249	0	0	0.0128482
R-16_Post Run-in	0.0270463	0.0606354	0.0301347	0.0348681	0.00124717	0.132871	0.00666707	0.0312615	0.0262669	0	0.0480079	0	0.10853	0.218177	0.0359542	0.181251	0	0.00805337	0.0490283	0	0	0
R-16_Week 8	0.0132894	0.019345	0	0.0341733	0	0.162433	0.00397543	0.0651811	0.0274832	0	0.0266054	0.0248387	0.0621434	0.240991	0.0358513	0.213199	0	0	0.0704904	0	0	0
R-4_Week 8	0.0148822	0	0.00647035	0	0	0.225226	0.0563564	0.0775837	0.0102663	0.0040425	0.00874422	0.0601025	0.0459967	0.137533	0.14159	0.142622	0.0104773	0	0.0581062	0	0	0
R-24_Baseline	0.00676334	0.0271975	0.0043117	0	0	0.17685	0	0.0398284	0.0314365	0	0.0200798	0.0210899	0.0917325	0.15181	0.0503812	0.227104	0.0120685	0	0.139347	0	0	0
R-24_Post Run-in	0.0028977	0.0207766	0.0176363	0	0	0.191524	0	0.0237533	0.00633027	0	0.011301	0.0303381	0.0757808	0.140913	0.0487789	0.226687	0	0	0.203284	0	0	0
R-9_Baseline	0.00938787	0	0.0092364	0.00373751	0	0.229686	0	0.0246061	0.0058256	0	0.0122954	0.0281109	0.0478471	0.218889	0.0305686	0.235481	0	0	0.144329	0	0	0
R-9_Post Run-in	0.0599963	0	0.0062809	0	0	0.166728	0.00564629	0.0505303	0.00708208	0	0.0531694	0	0.0151426	0.365104	0.0322708	0.153142	0	0.00812176	0.0767863	0	0	0
R-7_Post Run-in	0.00539653	0.0214715	0.000409026	0.0169831	0	0.144434	0.00443804	0.0106669	0.00519675	0	0.00583823	0.0153533	0.0171602	0.294546	0.00755364	0.318635	0.013948	0.0102805	0.10769	0	0	0
R-15_Baseline	0.0532737	0	0	0.0108154	0	0.106291	0	0.0341987	0.0486702	0	0.00332836	0.0162666	0.015629	0.289213	0.0113456	0.214941	0	0	0.196027	0	0	0
R-13_Post Run-in	0	0.0175044	0	0.000958344	0	0.210949	0	0.00617997	0.0184857	0	0.027697	0.0109113	0.111268	0.0950406	0.0486468	0.390205	0	0	0.0621535	0	0	0
R-13_Week 8	0.0684379	0	0.0165957	0	0	0.207431	0	0.111791	0	0	0	0.019761	0.0764055	0.0727471	0.0466743	0.313119	0	0	0.067037	0	0	0
R-10_Baseline	0.0210766	0	0	0.000394056	0	0.118417	0	0.0768875	0.0187438	0	0.01897	0.0150516	0.0835259	0.148543	0.0222604	0.302325	0	0.0848658	0.088939	0	0	0
R-10_Week 8	0.00138375	0.042135	0.000981188	0.104207	0	0.158842	0.00448498	0.069448	0.0337273	0.0144651	0.0257417	0.0146963	0.0210794	0.0989906	0.0477722	0.283625	0	0	0.0784201	0	0	0
R-10_Post Run-in	0.00996054	0.00934156	0	0	0	0.208606	0.0285675	0.0525036	0.00389824	0	0.0399789	0	0.0172927	0.23571	0.0351981	0.285973	0	0.0330393	0.0340352	0	0.00589543	0
R-4_Baseline	0.0507269	0	0.00796901	0	0	0.145937	0.0064093	0.0256243	0.0276022	0	0.0467169	0	0.0264589	0.297872	0.030293	0.219854	0	0	0.102965	0.0108747	0	0.000697353

## Sheet: CIBERSORT_p-values
Supplementary Table 17. P-values from two-sided Wilcoxon rank sum test for 22 cell types
Column1	pValue_BvsT1	mean(T1-B)	pValue_T1vsT2	mean(T2-T1)	pValue_BvsT2	mean(T1-B)_1	pValue_B_RvsNR	pValue_T1_RvsNR	pValue_T2_RvsNR	pValue_d_T1_B_RvsNR	pValue_d_T2_B_RvsNR	pValue_d_T2_T1_RvsNR
B.cells.naive	0.91	-0.001	0.812	0.005	0.875	0.026	0.454	0.777	0.571	0.214	0.5	0.8
B.cells.memory	0.554	0	0.855	0.035	0.371	0.011	0.284	0.092	0.135	0.538	0.346	1
Plasma.cells	0.407	0.006	1	-0.007	0.375	-0.004	0.515	0.04	0.079	0.549	0.5	0.2
T.cells.CD8	1	0	0.584	0.034	0.371	0.027	0.365	0.409	1	0.925	0.637	0.8
T.cells.CD4.naive	1	0.002	1	0	NA	0	NA	0.694	0.752	0.596	NA	0.414
T.cells.CD4.memory.resting	0.677	0.006	0.812	0.037	0.25	-0.007	1	0.743	0.857	0.57	0.5	0.8
T.cells.CD4.memory.activated	0.076	0.008	0.855	0.03	0.125	0.004	0.21	0.061	0.845	0.134	1	1
T.cells.follicular.helper	0.519	0.011	0.125	0.019	0.375	0.033	0.539	0.052	1	0.368	1	1
T.cells.regulatory..Tregs.	0.068	-0.01	0.438	0.005	0.625	0.01	0.839	0.51	0.381	0.808	0.5	0.8
T.cells.gamma.delta	NA	0	0.371	0.014	0.181	0.01	NA	NA	0.669	NA	0.5	0.747
NK.cells.resting	0.034	0.014	0.188	-0.006	0.875	-0.022	0.142	0.038	0.857	0.461	1	0.4
NK.cells.activated	0.204	-0.007	0.201	0.001	0.875	0.008	0.619	0.206	1	0.933	0.5	0.8
Monocytes	0.38	-0.007	0.125	-0.022	0.375	-0.031	0.008	0.267	0.571	0.028	1	1
Macrophages.M0	0.91	-0.012	0.625	-0.098	0.125	-0.042	0.24	0.827	0.857	0.808	1	1
Macrophages.M1	0.042	0.008	1	0.041	0.25	0.003	0.014	0.038	0.857	0.808	0.5	0.4
Macrophages.M2	0.204	-0.024	0.312	-0.039	0.125	-0.023	0.054	0.002	0.19	0.683	1	0.4
Dendritic.cells.resting	0.584	0.004	NA	0.003	1	0	0.417	0.157	0.752	0.479	1	NA
Dendritic.cells.activated	0.8	0.003	0.181	-0.021	1	-0.01	0.184	0.672	NA	0.252	1	0.554
Mast.cells.resting	0.85	-0.002	0.812	-0.028	0.125	0.006	0.142	0.069	0.571	0.933	0.5	0.8
Mast.cells.activated	NA	0	NA	-0.003	1	0	0.635	NA	NA	NA	1	NA
Eosinophils	1	0	1	0	NA	-0.001	NA	0.375	NA	0.596	NA	0.683
Neutrophils	1	0	NA	0	1	0	0.279	0.375	0.752	1	1	NA

## Sheet: TME gene sets
Supplementary Table 18. 61 tumor microenvironment gene sets with the representative gene markers, references, and genes that were used to calculate scores.
Cell types	Representative gene markers	References	Genes used in the analysis
M0 Macrophages	FAM155B+, ADCK5+, SEC61G+, RBFA+, AP1S1+, IRAK1+, CRYBG2+, YKT6+, PES1+, LCAL1+, CCT3+, CTSV+, BUD23+, LPCAT1+, TUBA4A+, NCF2+, YWHAZ+	Xu and Wang 2023	FAM155B,ADCK5,SEC61G,RBFA,AP1S1,IRAK1,YKT6,PES1,CCT3,CTSV,LPCAT1,TUBA4A,NCF2,YWHAZ
M1 Macrophages	CD40+, CD86+, CD80+, NOS2+, CXCL9+, MMP12+, CCL22+, CD1C+, LAMP3+, CD274+, ADAM19+	Takiguchi et al. 2021	CD40,CD86,CD80,NOS2,CXCL9,MMP12,CCL22,CD1C,LAMP3,CD274,ADAM19
M2 Macrophages	CD163+, MRC1+, SULT1B1+, F5+, VCAN+, RGS18+	Takiguchi et al. 2021	CD163,MRC1,SULT1B1,F5,VCAN,RGS18
Activated CD4+ T cells	CD4+, CD69+, CCL20+, JUNB+, FOS+, CD40LG+	Ding et al. 2023	CD4,CD69,CCL20,JUNB,FOS,CD40LG
Activated CD8+ T cells	CD8A+, CD69+, FOSB+, FOS+, DUSP1+, HSPA1B+	Ding et al. 2023	CD8A,CD69,FOSB,FOS,DUSP1,HSPA1B
Activated DCs	CCR7+, CD1C+, IL4R+, TUBB+, H2AFZ+, CD4+, IL7R+, TNFSF13B+	Madissoon et al. 2020	CCR7,CD1C,IL4R,TUBB,H2AFZ,CD4,IL7R,TNFSF13B
Activated Mast Cells	CD63+, TPSB2+, TPSAB1+, HDC+, CPA3+	Wu et al. 2022, Faiz et al. 2007	CD63,TPSB2,TPSAB1,HDC,CPA3
Activated Memory CD4+ T cells	CD4+, CD69+, CCL20+, JUNB+, FOS+, CD40LG+, IL7+, CCR8+, LY86+	Ding et al. 2023, Ning et al. 2020	CD4,CD69,CCL20,JUNB,FOS,CD40LG,IL7,CCR8,LY86
Activated NK cells	CD3G-, NKG7+, GNLY+, TYROBP+, PRF1+, CST7+, CD69hi, CCL3+, IFNG+, TNF+, HSPA1B+	Ding et al. 2023	NKG7,GNLY,TYROBP,PRF1,CST7,CD69,CCL3,IFNG,TNF,HSPA1B
Activated TANs	PTPRC+, ITGAM+, FUT4hi, CEACAM8+, MPO+, ARG1+, FCGR3A+, IL5RA-, Cd14-, HLA-DR-	Eruslanov 2017	PTPRC,ITGAM,FUT4,CEACAM8,MPO,ARG1,FCGR3A
B cell	MS4A1+, CD79A+, CD83+, BANK1+, CD19+, PU2F2+	Nieto et al. 2021, Pal et al. 2021	MS4A1,CD79A,CD83,BANK1,CD19
C1QC Macrophages	SPP1lo, APOE+, FN1lo, FTL+, C1QAhi, C1QBhi, C1QChi, LYZ+, CST3+, HLA-DRA+, HLA-DPB1+, HLA-DQB1+, CD83+, CXCL2+, CD86+, CD14+	Nieto et al. 2021, Ding et al. 2023	SPP1,APOE,FN1,FTL,C1QA,C1QB,C1QC,LYZ,CST3,HLA-DRA,HLA-DPB1,HLA-DQB1,CD83,CXCL2,CD86,CD14
CAF	PDGFRA+, COL1A1+, ACTA2+, PDGFRB+, CD34+, MMP2+, APOD+, CLMP+, MMP3+, TWIST2+, DPT+, IGFBP6+, DCN+, LUM+	Wu et al. 2021, Pal et al. 2021	PDGFRA,COL1A1,ACTA2,PDGFRB,CD34,MMP2,APOD,CLMP,MMP3,TWIST2,DPT,IGFBP6,DCN,LUM
Cancer Stem Cell	CD44+, CD24+, ALDH1+, EPCAM+, LGR5+, CD133+, LGR5+, PIWIL2+	Kong et al. 2018	CD44,EPCAM,LGR5,PIWIL2
CD8+ T cells	CD3E+, CD3D+, CD8A+, NKG7+	Li et al. 2022	CD3E,CD3D,CD8A,NKG7
cDC1	HLA-DR+, ITGAXlo, THBD+, XCR1+, LY75+, CLEC9A+, IRF8+, CADM1+, CST3+	Wculek et al. 2021, Wu et al. 2021, Ding et al. 2023, Heger et al. 2020	ITGAX,THBD,XCR1,LY75,CLEC9A,IRF8,CADM1,CST3
cDC2	ITGAX+, HLA-DR+, ITGAM+, SIRPA+, CD1C+, FCER1A+, CLEC10A+, CD86+, CST3+, CD1A+ (migratory cDC2 only)	Wculek et al. 2021, Wu et al. 2021, Ding et al. 2023, Heger et al. 2020	ITGAX,ITGAM,SIRPA,CD1C,FCER1A,CLEC10A,CD86,CST3,CD1A
cDCs	LYZ+, TXN+, CCL22+, CST3+, FSCN1+, HLA-DRA+, HLA-DPB1+, HLA-DQB1+	Nieto et al. 2021	LYZ,TXN,CCL22,CST3,FSCN1,HLA-DRA,HLA-DPB1,HLA-DQB1
Central memory CD4+ T cells	LMNA+, ANXA1+, ANXA2+, CCR7+, ITGB1+	Ding et al. 2023	LMNA,ANXA1,ANXA2,CCR7,ITGB1
Cytotoxic CD8+ T cells	CCL5+, GZMA+, CD8A+, GZMK+, GZMB+, LAG3+, PRF1+, GNLY+, NKG7+, CST7+	Nieto et al. 2021, Ding et al. 2023	CCL5,GZMA,CD8A,GZMK,GZMB,LAG3,PRF1,GNLY,NKG7,CST7
Cytotoxic NK cells	CD3G-, NKG7+, GNLY+, TYROBP+, PRF1+, CST7+, GZMAhi. GZMB+, TYROBPhi	Ding et al. 2023	NKG7,GNLY,TYROBP,PRF1,CST7,GZMA,GZMB
DCreg	C1QA+, FCGR3A+, FTL+, SLCO2B1+, CATC+, GIZL+, STAB1+	Gueguen et al. 2015	C1QA,FCGR3A,FTL,SLCO2B1,STAB1
Effector/memory CD4+ T cells	CREM+, ANXA1+, RGCC+, KLRB1+, AQP3+, CCR6+, LTB+, BHLHE40+	Nieto et al. 2021, Ding et al. 2023	CREM,ANXA1,RGCC,KLRB1,AQP3,CCR6,LTB,BHLHE40
Effector/Memory CD8+ T cells	CCL5+, GZMA+, CD8A+, GZMK+, IL7R+, JUNB+, TSC22D3+, CYTB+, FXYD5+, RACK1+, ATP5F1E+	Nieto et al. 2021	CCL5,GZMA,CD8A,GZMK,IL7R,JUNB,TSC22D3,FXYD5
eMDSC	HLA-DR-, CD33+, CD14-, FUT4-	Weber et al. 2021, Darden et al. 2021, Savardekar et al. 2023	CD33
Eosinophils	CCR3+, CCR1+, CCR5+, CXCR4+, LTB4R+, PTGDR2+, IFNGR1+, IFNGR2+, CD80+, ICAM1+, FAS+, LILRB3+, CD274+, TLR2+, TLR4+, C5AR1+, C5AR2+, FCER1A+, FCER1G+, FCER2+, ADGRE1+, SIGLEC8+, IL5RA+, IL3RA+, IL4R+, ST2+, IL3+, IL4+, IL5+, IL6+, IL13+, IL9+, IL10+, IL1B+, IL12A+, IL12B+, IL17A+, IL23A+, IL25+, IL1A+, IFNG+, TNF+, CCL3+, CCL5+, CCL11+, CCL22+, CCL24+, CCL17+, CXCL9+, CXCL10+, CXCL13+	Jacobsen et al. 2021	CCR3,CCR1,CCR5,CXCR4,LTB4R,PTGDR2,IFNGR1,IFNGR2,CD80,ICAM1,FAS,LILRB3,CD274,TLR2,TLR4,C5AR1,C5AR2,FCER1A,FCER1G,FCER2,SIGLEC8,IL5RA,IL3RA,IL4R,IL3,IL4,IL5,IL6,IL13,IL9,IL10,IL1B,IL12A,IL12B,IL17A,IL23A,IL25,IL1A,IFNG,TNF,CCL3,CCL5,CCL11,CCL22,CCL24,CCL17,CXCL9,CXCL10,CXCL13
Exhausted CD8+ T cells	LAG3+, PDCD1+, TIGIT+, ITGAE+, TOX+, PRDM1+, HAVCR2+, CXCL13+, CTLA4+	Wu et al. 2021, Ding et al. 2023	LAG3,PDCD1,TIGIT,ITGAE,TOX,PRDM1,HAVCR2,CXCL13,CTLA4
Exhausted NK cells	CD3G-, NKG7hi, GNLYhi, TYROBP+, PRF1+, CST7+, HAVCR2+, PRF1hi, KLRF1+, KLRB1+, TNFRSF1B+	Ding et al. 2023	NKG7,GNLY,TYROBP,PRF1,CST7,HAVCR2,KLRF1,KLRB1,TNFRSF1B
G-MDSC	CD3-, FCGR3A-, CD19-, MS4A1-, NCAM1-, HLA-DR-, ITGAM+, CD14-, FUT4+, CEACAM8+, CD33+, S100A8+, S100A9+, S100A12+, VCAN+	Weber et al. 2021, Darden et al. 2021, Savardekar et al. 2023	ITGAM,FUT4,CEACAM8,CD33,S100A8,S100A9,S100A12,VCAN
ɣδ T cells	CD4-, CD8A-, CD3E+, TRGC1+, TRGC2+, TRDC+, NKG7+, GNLY+, TRGV2+, FCGR3A+	Pizzolato et al. 2019, Madissoon et al. 2020	CD3E,NKG7,GNLY,FCGR3A
Lipid-Associated Macrophages	CCL18+, TREM2+, FABP5+, APOE+, SPP1+, CD274+, PDCD1LG2+	Wu et al. 2021	CCL18,TREM2,FABP5,APOE,SPP1,CD274,PDCD1LG2
Lymphatic Endothelial cells	LYVE1+, PECAM1+, VWF+, CD34+, TFF3+, CYLD+, MMRN1+, CLIC2+, TFP+, SOX4+, GJA1+, PTPRB+, CDH5+, ERG+, TSPAN12+, HEY1+, PRRG4+	Wu et al. 2021, Pal et al. 2021	LYVE1,PECAM1,VWF,CD34,TFF3,CYLD,MMRN1,CLIC2,SOX4,GJA1,PTPRB,CDH5,ERG,TSPAN12,HEY1,PRRG4
M-MDSC	CD3-, FCGR3A-, CD19-, MS4A1-, NCAM1-, ITGAM+, CD14+, FUT4-, HLA-DRlow/-, CD33+, S100A8+, S100A9+, S100A12+, VCAN+	Weber et al. 2021, Sun et al. 2019, Darden et al. 2021, Savardekar et al. 2023, Zhao et al. 2012	ITGAM,CD14,CD33,S100A8,S100A9,S100A12,VCAN
Macrophage	APOE+, CD5L+, MARCO+	Madissoon et al. 2020	APOE,CD5L,MARCO
Mast Cells	TPSB2+, TPSAB1+, CPA3+, GATA2+, HDC+	Nieto et al. 2021, Ding et al. 2023, Wu et al. 2022	TPSB2,TPSAB1,CPA3,GATA2,HDC
Memory B cells	CD27+, CD69+, CLEC9A+, TFRC+, BST2+, CD180+, ICAM1+, CR2+, ITGAL+	Wu et al. 2021, Ding et al. 2023, Weisel et al. 2021	CD27,CD69,CLEC9A,TFRC,BST2,CD180,ICAM1,CR2,ITGAL
moDCs	LYZ+, CST3+, HLA-DRA+, HLA-DPB1+, HLA-DQB1+, TIMP1+	Nieto et al. 2021	LYZ,CST3,HLA-DRA,HLA-DPB1,HLA-DQB1,TIMP1
Monocytes	CD14+, FCN1+, S100A9+, LYZ+, CLEC10A+, VCAN+	Hijdra et al. 2012, Ding et al. 2023, Madissoon et al. 2020	CD14,FCN1,S100A9,LYZ,CLEC10A,VCAN
Naïve B cells	IGHD+, SELL+, YBX3+, IL4R+, FCER2+, CD200+, CD9+, CD81+	Wu et al. 2021, Ding et al. 2023, Weisel et al. 2021	SELL,YBX3,IL4R,FCER2,CD200,CD9,CD81
Naïve CD4+ T cells	CCR7+, SELL+, IL7R+, LTB+, TCF7+, EEF1G+, LDHB+, MYC+	Wu et al. 2021	CCR7,SELL,IL7R,LTB,TCF7,EEF1G,LDHB,MYC
Naive CD8+ T cells	CD8A+, YBX3+, TGFB1+, CCL5+, CXCR3+	Ding et al. 2023	CD8A,YBX3,TGFB1,CCL5,CXCR3
Naive NK cells	CD3G-, NKG7+, GNLY+, TYROBP+, PRF1+, CST7+, IL7R+, TCF7+, XCL1+, CCR7+, SELL+	Ding et al. 2023	NKG7,GNLY,TYROBP,PRF1,CST7,IL7R,TCF7,XCL1,CCR7,SELL
Neutrophils	FCGR3B+, CSF3R+, S100A8+, S100A9+	Ding et al. 2023	FCGR3B,CSF3R,S100A8,S100A9
NK cells	AREG+, KLRB1+, KLRC1+, FCER1G+, GNLY+, NKG7+, CCL4+, CCL5+, GZMA+, GZMB+, FGFBP2+, SPON2+, PRF1+, GNLY+	Wu et al. 2021	AREG,KLRB1,KLRC1,FCER1G,GNLY,NKG7,CCL4,CCL5,GZMA,GZMB,FGFBP2,SPON2,PRF1
NKT cells	TRAC+, TRBC1+, FCER1G+, GNLY+, FCGR3A+, NKG7+, KLRB1+, KLRC1+	Wu et al. 2021	FCER1G,GNLY,FCGR3A,NKG7,KLRB1,KLRC1
pDC	ITGAX-, IL3RA+, HLA-Drlo, CLEC4C+, NRP1+, CXCR3+, CCR2+, IRF7+, GZMB+, PTGDS+, TSPAN13+, TCF4+, SPON2+, CLEC4C+, IRF8+	Wu et al. 2021, Nieto et al. 2021, Wculek et al. 2020, Ding et al. 2023	IL3RA,CLEC4C,NRP1,CXCR3,CCR2,IRF7,GZMB,PTGDS,TSPAN13,TCF4,SPON2,IRF8
Pericytes	MCAM+, ACTA2+, PDGFRB+, COL1A1+, PROCR+, EPAS1+, ACTA2+, COL6A3+	Wu et al. 2021, Pal et al. 2021	MCAM,ACTA2,PDGFRB,COL1A1,PROCR,EPAS1,COL6A3
Plasma Cells	IGKC+, IGLC2+, CD79A+, IGHG1+, IGHG3+, IGHG4+, JCHAIN+, MZB1+, XBP1+	Wu et al. 2021, Nieto et al. 2021, Pal et al. 2021, Ding et al. 2023	CD79A,MZB1,XBP1
Pre-Exhausted CD8+ T cells	MX1+, ISG15+, IFI44L+, IFI6+, CCL5+, GZMA+, CD8A+, GZMK+, LAG3+, PRF1+, GNLY+	Nieto et al. 2021	MX1,ISG15,IFI44L,IFI6,CCL5,GZMA,CD8A,GZMK,LAG3,PRF1,GNLY
Proliferating CD8+ T cells	MKI67+, TOP2A+, CDK1+, STMN1+, TUBB+, TYMS+	Wu et al. 2021	MKI67,TOP2A,CDK1,STMN1,TUBB,TYMS
Resting CD4+ T cells	KLF2+, FGL2+, MSRA+, GIMAP1+, LRRTM2+, RHOJ+	Luca et al. 2021	KLF2,FGL2,MSRA,GIMAP1,LRRTM2,RHOJ
Resting Memory CD4+ T cells	CD4+, IL2RA-, CD69-, HLA-DRA-, HLA-DRB1-, IL7+, CCR8+, LY86+	Marcial et al. 2020, Ning et al. 2020	CD4,IL7,CCR8,LY86
SPP1 Macrophages	SPP1+, APOE+, FN1+, FTL+, C1QA+, C1QB+, C1QC+, LYZ+, CST3+, HLA-DRA+, HLA-DPB1+	Nieto et al. 2021	SPP1,APOE,FN1,FTL,C1QA,C1QB,C1QC,LYZ,CST3,HLA-DRA,HLA-DPB1
T cells	TRAC+, TRBC1+, TRBC2+, CD3E+, CD7+, CD69+	Wu et al. 2021, Pal et al. 2021	CD3E,CD7,CD69
T follicular helper cells	CXCL13+, IL21+, PDCD1+, TOX+, CD40LG+, CTLA4+, ICOS+, BATF+	Wu et al. 2021, Ding et al. 2023	CXCL13,IL21,PDCD1,TOX,CD40LG,CTLA4,ICOS,BATF
Terminally Exhausted CD8+ T cells	CCL5+, GZMA+, CD8A+, GZMK+, CXCL13+, CCL4+, DUSP2+. LAG3+, PRF1+, GNLY+	Nieto et al. 2021	CCL5,GZMA,CD8A,GZMK,CXCL13,CCL4,DUSP2,LAG3,PRF1,GNLY
Th1	IL7R+, CD40LG+	Wu et al. 2021	IL7R,CD40LG
Tissue-Resident Memory CD8+ T cells	CD8A+, CD69+, KLRC1+, KLRD1+, IFNG+, NKG7+	Ding et al. 2023	CD8A,CD69,KLRC1,KLRD1,IFNG,NKG7
Treg	FOXP3+, IL2RA+, TNFRSF4+, ICOS+, PRDM1+, TNFRSF18+, BATF+, IKZF2+, CTLA4+, TIGIT+	Wu et al. 2021, Nieto et al. 2021, Ding et al. 2023	FOXP3,IL2RA,TNFRSF4,ICOS,PRDM1,TNFRSF18,BATF,IKZF2,CTLA4,TIGIT
Tumor Associated Neutrophil (TAN)	PTPRC+, ITGAM+, FUT4+, CEACAM8+, MPO+, ARG1+, FCGR3A+, IL5RA-	Eruslanov 2017	PTPRC,ITGAM,FUT4,CEACAM8,MPO,ARG1,FCGR3A
Vascular Endothelial cells	PECAM1+, CD34+, VWF+, MCAM+, COL5A1+, SNAI1+, SPARC+, ENG+, FLT1+, CD93+, PLVAP+, SOX17+	Wu et al. 2021, Pal et al. 2021	PECAM1,CD34,VWF,MCAM,COL5A1,SNAI1,SPARC,ENG,FLT1,CD93,PLVAP,SOX17
References
Gueguen C, Bouley J, Moussu H, Luce S, Duchateau M, Chamot-Rooke J, Pallardy M, Lombardi V, Nony E, Baron-Bodo V, Mascarell L, Moingeon P. Changes in markers associated with dendritic cells driving the differentiation of either TH2 cells or regulatory T cells correlate with clinical benefit during allergen immunotherapy. J Allergy Clin Immunol. 2016 Feb;137(2):545-58. doi: 10.1016/j.jaci.2015.09.…
Kong, Yanan et al. “Breast cancer stem cell markers CD44 and ALDH1A1 in serum: distribution and prognostic value in patients with primary breast cancer.” Journal of Cancer vol. 9,20 3728-3735. 8 Sep. 2018, doi:10.7150/jca.28032
Hijdra D et al. (2012). Differential expression of TNFR1 (CD120a) and TNFR2 (CD120b) on subpopulations of human monocytes. J Inflamm (Lond) 9, 38-43.
Eruslanov, Evgeniy B. “Phenotype and function of tumor-associated neutrophils and their subsets in early-stage human lung cancer.” Cancer immunology, immunotherapy : CII vol. 66,8 (2017): 997-1006. doi:10.1007/s00262-017-1976-0
Wculek SK, Cueto FJ, Mujal AM, Melero I, Krummel MF, Sancho D. Dendritic cells in cancer immunology and immunotherapy. Nat Rev Immunol. 2020 Jan;20(1):7-24. doi: 10.1038/s41577-019-0210-z. Epub 2019 Aug 29. PMID: 31467405.
Wu, S.Z., Al-Eryani, G., Roden, D.L. et al. A single-cell and spatially resolved atlas of human breast cancers. Nat Genet 53, 1334–1347 (2021). https://doi-org.libproxy2.usc.edu/10.1038/s41588-021-00911-1
Nieto P, Elosua-Bayes M, Trincado JL, Marchese D, Massoni-Badosa R, Salvany M, Henriques A, Nieto J, Aguilar-Fernández S, Mereu E, Moutinho C, Ruiz S, Lorden P, Chin VT, Kaczorowski D, Chan CL, Gallagher R, Chou A, Planas-Rigol E, Rubio-Perez C, Gut I, Piulats JM, Seoane J, Powell JE, Batlle E, Heyn H. A single-cell tumor immune atlas for precision oncology. Genome Res. 2021 Oct;31(10):1913-1926.…
Pal B, Chen Y, Vaillant F, Capaldo BD, Joyce R, Song X, Bryant VL, Penington JS, Di Stefano L, Tubau Ribera N, Wilcox S, Mann GB; kConFab; Papenfuss AT, Lindeman GJ, Smyth GK, Visvader JE. A single-cell RNA expression atlas of normal, preneoplastic and tumorigenic states in the human breast. EMBO J. 2021 Jun 1;40(11):e107333. doi: 10.15252/embj.2020107333. Epub 2021 May 5. PMID: 33950524; PMCID: …
Ding S, Qiao N, Zhu Q, Tong Y, Wang S, Chen X, Tian Q, Xiao Y, Shen K. Single-cell atlas reveals a distinct immune profile fostered by T cell-B cell crosstalk in triple negative breast cancer. Cancer Commun (Lond). 2023 Jun;43(6):661-684. doi: 10.1002/cac2.12429. Epub 2023 May 9. PMID: 37158690; PMCID: PMC10259667.
Jacobsen EA, Jackson DJ, Heffler E, Mathur SK, Bredenoord AJ, Pavord ID, Akuthota P, Roufosse F, Rothenberg ME. Eosinophil Knockout Humans: Uncovering the Role of Eosinophils Through Eosinophil-Directed Biological Therapies. Annu Rev Immunol. 2021 Apr 26;39:719-757. doi: 10.1146/annurev-immunol-093019-125918. Epub 2021 Mar 1. PMID: 33646859; PMCID: PMC8317994.
Pizzolato G, Kaminski H, Tosolini M, Franchini DM, Pont F, Martins F, Valle C, Labourdette D, Cadot S, Quillet-Mary A, Poupot M, Laurent C, Ysebaert L, Meraviglia S, Dieli F, Merville P, Milpied P, Déchanet-Merville J, Fournié JJ. Single-cell RNA sequencing unveils the shared and the distinct cytotoxic hallmarks of human TCRVδ1 and TCRVδ2 γδ T lymphocytes. Proc Natl Acad Sci U S A. 2019 Jun 11;11…
Weber R, Groth C, Lasser S, Arkhypov I, Petrova V, Altevogt P, Utikal J, Umansky V. IL-6 as a major regulator of MDSC activity and possible target for cancer immunotherapy. Cell Immunol. 2021 Jan;359:104254. doi: 10.1016/j.cellimm.2020.104254. Epub 2020 Nov 29. PMID: 33296753.
Weisel, N.M., Joachim, S.M., Smita, S. et al. Surface phenotypes of naive and memory B cells in mouse and human tissues. Nat Immunol 23, 135–145 (2022). https://doi-org.libproxy2.usc.edu/10.1038/s41590-021-01078-x
Li, C., Wu, H., Guo, L. et al. Single-cell transcriptomics reveals cellular heterogeneity and molecular stratification of cervical cancer. Commun Biol 5, 1208 (2022). https://doi.org/10.1038/s42003-022-04142-w
Madissoon, E., Wilbrey-Clark, A., Miragaia, R.J. et al. scRNA-seq assessment of the human lung, spleen, and esophagus tissue stability after cold preservation. Genome Biol 21, 1 (2020). https://doi.org/10.1186/s13059-019-1906-x
Wu C, Boey D, Bril O, Grootens J, Vijayabaskar MS, Sorini C, Ekoff M, Wilson NK, Ungerstedt JS, Nilsson G, Dahlin JS. Single-cell transcriptomics reveals the identity and regulators of human mast cell progenitors. Blood Adv. 2022 Aug 9;6(15):4439-4449. doi: 10.1182/bloodadvances.2022006969. PMID: 35500226; PMCID: PMC9636317.
Faiz A, Pavlidis S, Kuo CH, Rowe A, Hiemstra PS, Timens W, Berg M, Wisman M, Guo YK, Djukanović R, Sterk P, Meyer KB, Nawijn MC, Adcock I, Chung KF, van den Berge M. Th2 high and mast cell gene signatures are associated with corticosteroid sensitivity in COPD. Thorax. 2023 Apr;78(4):335-343. doi: 10.1136/thorax-2021-217736. Epub 2022 Dec 7. PMID: 36598042; PMCID: PMC10086461.
Luca BA, Steen CB, Matusiak M, Azizi A, Varma S, Zhu C, Przybyl J, Espín-Pérez A, Diehn M, Alizadeh AA, van de Rijn M, Gentles AJ, Newman AM. Atlas of clinically distinct cell states and ecosystems across human solid tumors. Cell. 2021 Oct 14;184(21):5482-5496.e28. doi: 10.1016/j.cell.2021.09.014. Epub 2021 Sep 30. PMID: 34597583; PMCID: PMC8526411.
García M, López-Fernández L, Mínguez P, Morón-López S, Restrepo C, Navarrete-Muñoz MA, López-Bernaldo JC, Benguría A, García MI, Cabello A, Fernández-Guerrero M, De la Hera FJ, Estrada V, Barros C, Martínez-Picado J, Górgolas M, Benito JM, Rallón N. Transcriptional signature of resting-memory CD4 T cells differentiates spontaneous from treatment-induced HIV control. J Mol Med (Berl). 2020 Aug;98(…
Ning ZK, Hu CG, Huang C, Liu J, Zhou TC, Zong Z. Molecular Subtypes and CD4+ Memory T Cell-Based Signature Associated With Clinical Outcomes in Gastric Cancer. Front Oncol. 2021 Mar 17;10:626912. doi: 10.3389/fonc.2020.626912. PMID: 33816214; PMCID: PMC8011500.
Takiguchi, H., Yang, C.X., Yang, C.W.T. et al. Macrophages with reduced expressions of classical M1 and M2 surface markers in human bronchoalveolar lavage fluid exhibit pro-inflammatory gene signatures. Sci Rep 11, 8282 (2021). https://doi.org/10.1038/s41598-021-87720-y
Xu X, Wang J. Prognostic prediction and multidimensional dissections of a macrophages M0-related gene signature in liver cancer. Front Endocrinol (Lausanne). 2023 Mar 24;14:1153562. doi: 10.3389/fendo.2023.1153562. PMID: 37033261; PMCID: PMC10080084.
Heger L, Hofer TP, Bigley V, de Vries IJM, Dalod M, Dudziak D, Ziegler-Heitbrock L. Subsets of CD1c+ DCs: Dendritic Cell Versus Monocyte Lineage. Front Immunol. 2020 Sep 30;11:559166. doi: 10.3389/fimmu.2020.559166. PMID: 33101275; PMCID: PMC7554627.
Sun Y, Shao J, Jiang F, Wang Y, Yan Q, Yu N, Zhang J, Zhang J, Li M, He Y. CD33+ CD14+ CD11b+ HLA-DR- monocytic myeloid-derived suppressor cells recruited and activated by CCR9/CCL25 are crucial for the pathogenic progression of endometriosis. Am J Reprod Immunol. 2019 Jan;81(1):e13067. doi: 10.1111/aji.13067. Epub 2018 Nov 16. PMID: 30375700.
Darden DB, Bacher R, Brusko MA, Knight P, Hawkins RB, Cox MC, Dirain ML, Ungaro R, Nacionales DC, Rincon JC, Gauthier ML, Kladde M, Bihorac A, Brusko TM, Moore FA, Brakenridge SC, Mohr AM, Moldawer LL, Efron PA. Single-Cell RNA-seq of Human Myeloid-Derived Suppressor Cells in Late Sepsis Reveals Multiple Subsets With Unique Transcriptional Responses: A Pilot Study. Shock. 2021 May 1;55(5):587-595…
Savardekar, Himanshu et al. “Single-Cell RNA-Seq Analysis of Patient Myeloid-Derived Suppressor Cells and the Response to Inhibition of Bruton's Tyrosine Kinase.” Molecular cancer research : MCR, 10.1158/1541-7786.MCR-22-0572. 28 Nov. 2023, doi:10.1158/1541-7786.MCR-22-0572
Zhao, Fei et al. “S100A9 a new marker for monocytic human myeloid-derived suppressor cells.” Immunology vol. 136,2 (2012): 176-83. doi:10.1111/j.1365-2567.2012.03566.x

## Sheet: gene scores
Supplementary Table 19. Gene set scores for 61 tumor microenvironment gene sets calculated using gene expression with the help of the GSVA package.
Cell types	R-18_Baseline	R-5_Baseline	R-5_Post Run-in	R-12_Baseline	R-12_Post Run-in	R-19_Post Run-in	R-20_Baseline	R-20_Post Run-in	R-2_Baseline	R-2_Post Run-in	R-18_Post Run-in	R-2_Week 8	R-14_Baseline	R-14_Post Run-in	R-6_Baseline	R-6_Post Run-in	R-6_Week 8	R-8_Baseline	R-8_Post Run-in	R-17_Baseline	R-17_Post Run-in	R-23_Week 8	R-16_Post Run-in	R-16_Week 8	R-4_Week 8	R-24_Baseline	R-24_Post Run-in	R-9_Baseline	R-9_Post Run-in	R-7_Post Run-in	R-15_Baseline	R-13_Post Run-in	R-13_Week 8	R-10_Baseline	R-10_Week 8	R-10_Post Run-in	R-4_Baseline
M0 Macrophages	-0.209288	0.392649	0.296443	0.305417	0.310375	0.0461794	-0.17005	-0.169611	0.246949	0.104166	-0.248374	-0.478625	0.2123	0.241578	0.496998	0.486183	0.542035	0.385569	0.429364	-0.0640097	-0.492897	0.111713	-0.192232	-0.491359	0.274973	-0.0807105	-0.564417	-0.483777	-0.145157	-0.457254	-0.107715	-0.554255	-0.431305	-0.284196	-0.579157	0.254245	-0.314722
M1 Macrophages	-0.520168	-0.323839	0.270106	-0.583478	-0.785968	-0.513773	-0.349933	-0.20255	0.737571	0.58281	-0.724309	0.820738	0.731598	0.71271	-0.410302	-0.445265	-0.405034	0.305315	0.0842727	-0.200085	0.352919	-0.730028	0.374765	0.668454	0.61709	-0.344373	0.0463291	-0.434618	-0.0239543	0.49204	-0.528189	-0.485042	-0.620605	-0.690195	0.407409	-0.0828523	0.16987
M2 Macrophages	-0.493105	-0.511613	-0.223112	0.140977	-0.105436	-0.693415	-0.590241	-0.433608	0.36295	0.307918	-0.643171	0.206848	0.255309	0.458651	-0.64891	-0.716318	-0.343691	0.1494	-0.476413	0.431602	0.658351	-0.0026861	0.00061932	0.573575	0.148655	0.212575	0.436363	0.521746	0.335614	0.629008	-0.498044	0.439538	-0.378025	-0.621594	0.783119	-0.205714	-0.37636
Activated CD4+ T cells	-0.869205	-0.220049	0.242644	-0.613024	-0.218367	-0.538828	-0.595866	-0.570232	0.782307	0.602822	-0.802305	0.481673	0.678592	0.448718	-0.3206	-0.369769	0.187068	0.0857064	0.0192658	0.00156937	0.0312507	-0.661524	-0.177224	0.782127	0.767206	-0.263966	0.0972282	-0.105686	-0.354554	0.717604	-0.344071	-0.413624	-0.530392	-0.665992	0.598044	0.590198	0.454719
Activated CD8+ T cells	-0.619199	-0.0180701	0.216691	-0.596587	-0.302536	0.37355	-0.140594	-0.690379	0.464377	0.450076	-0.497996	-0.0588113	0.200813	0.119369	-0.415245	-0.393925	0.168064	-0.0109054	-0.26013	-0.248261	-0.250646	-0.265806	-0.150486	0.531314	0.478743	-7.73877e-05	-0.320662	-0.281422	-0.112591	-0.165786	-0.135363	-0.519023	-0.125642	0.307428	0.414215	0.763437	0.00647391
Activated DCs	-0.688505	-0.12823	0.281527	-0.564217	-0.442006	-0.395967	-0.627939	-0.212699	0.775079	0.710823	-0.702669	0.841401	0.543717	0.591201	-0.0374664	-0.132403	-0.446925	0.107069	0.175173	0.290517	0.472438	-0.443764	0.0430387	0.250051	0.589807	-0.0872159	0.0913542	-0.411405	-0.237555	0.205881	-0.792219	-0.0887986	-0.704978	-0.738072	0.623023	-0.0362405	-0.141179
Activated Mast Cells	-0.0761486	-0.205541	-0.420442	-0.115021	-0.353853	-0.429187	0.8876	0.865801	0.53026	0.0219959	-0.471618	-0.608196	-0.700834	-0.508687	-0.774729	-0.811013	-0.893931	-0.578577	0.0832175	0.128085	0.672095	0.183369	-0.135318	0.560239	0.0478859	0.513889	0.851871	0.529874	0.30461	0.725911	0.289919	-0.576005	-0.551067	-0.460028	0.817289	-0.413069	0.613379
Activated Memory CD4+ T cells	-0.7689	-0.319909	0.0374035	-0.506226	-0.303034	-0.43197	-0.28731	-0.49437	0.769802	0.608144	-0.802413	0.691327	0.698453	0.366659	-0.447984	-0.594133	0.0773129	-0.0987606	-0.143591	0.00156958	0.0854249	-0.505314	-0.207722	0.779228	0.6881	-0.26907	0.430089	-0.0849814	-0.423886	0.741558	-0.471443	-0.432708	-0.561578	-0.588407	0.679851	0.494634	0.0465754
Activated NK cells	-0.611188	-0.219811	0.567909	-0.689818	-0.545156	-0.505225	-0.291655	-0.70395	0.790562	0.78518	-0.662501	0.645245	0.698992	0.64885	-0.353273	-0.422433	0.210542	0.33461	-0.213795	0.0538035	-0.109283	-0.651948	-0.220492	0.69674	0.915239	-0.0483	0.119194	0.144862	0.0149366	0.235709	-0.744328	-0.308234	-0.734558	-0.721034	0.710134	0.329753	-0.462224
Activated TANs	-0.37289	-0.374697	0.198259	-0.394707	-0.572635	-0.442038	-0.511763	-0.629516	0.516076	0.569996	-0.493565	0.53811	0.284563	0.502803	-0.321186	-0.371743	0.506886	0.423522	-0.265519	0.0641089	0.204857	-0.453188	0.0637414	0.824533	0.61022	0.239049	0.60512	-0.300345	-0.684697	0.440564	-0.635485	0.307182	-0.647959	-0.508724	0.744146	0.0337369	0.191761
B cell	-0.558344	-0.43238	0.251202	-0.681209	-0.691487	-0.362014	-0.640381	-0.670156	0.799683	0.905518	-0.749397	0.951307	0.877685	0.874803	-0.195244	-0.642119	-0.520472	0.511878	0.0810703	0.0793615	0.349521	-0.840918	0.477245	0.73878	0.357082	-0.0548805	0.16303	-0.285213	-0.322534	0.687396	-0.726718	-0.430481	-0.819816	-0.690865	0.675918	-0.0451509	-0.421153
C1QC Macrophages	-0.589879	-0.167277	-0.132537	-0.193252	-0.328252	-0.50018	-0.633135	-0.63452	0.447005	0.483383	-0.670421	0.301855	0.266764	0.519501	-0.441507	-0.381764	0.268385	0.0673175	-0.330826	0.323858	0.579577	-0.550917	0.176843	0.75741	0.662976	-0.0116676	0.49091	-0.294637	-0.1734	0.797946	-0.65767	0.432482	-0.785429	-0.755487	0.847459	0.385592	-0.0903321
CAF	0.210244	0.21934	-0.36969	-0.427744	-0.719816	-0.45113	0.440879	0.704982	0.259797	0.230971	-0.523381	0.142845	-0.774946	-0.328823	-0.544278	-0.448552	-0.406143	-0.186348	0.16752	-0.545083	-0.311413	0.130394	-0.231008	0.113777	-0.616624	-0.613268	0.156345	0.813425	0.619986	0.623312	0.64015	-0.752149	0.0946323	0.22768	0.779487	0.142467	0.351092
Cancer Stem Cell	0.213228	0.731349	0.345902	-0.0669567	-0.599739	-0.343768	-0.499678	-0.442495	-0.0451842	0.204587	-0.374266	-0.0976983	-0.559367	-0.367417	0.337925	0.469378	0.484263	-0.261351	-0.11155	0.471844	0.267638	-0.627736	0.308299	-0.186545	-0.754747	-0.391579	-0.382337	-0.00166815	0.0727178	0.398855	0.48956	0.0507514	-0.654487	-0.160005	0.168429	-0.276116	-0.642799
CD8+ T cells	-0.604062	-0.347382	0.585904	-0.800708	-0.781205	-0.846126	-0.85747	-0.811155	0.853434	0.890827	-0.645131	0.908671	0.869082	0.846081	-0.507577	-0.55165	0.485115	0.36137	0.0867557	-0.0508877	-0.0434979	-0.956555	0.299665	0.876569	0.903605	-0.0113881	0.413693	0.041293	-0.0997731	0.161163	-0.767396	0.128318	-0.700681	-0.815503	0.94288	0.131187	-0.695256
cDC1	-0.348587	-0.405814	-0.324808	-0.507189	-0.656082	-0.421194	0.103858	-0.0182187	0.609986	0.430719	-0.64647	0.74242	0.749114	0.697395	-0.6182	-0.604729	-0.579381	-0.0183061	-0.0783755	0.0537358	0.367563	-0.624847	0.402575	0.77009	0.351461	-0.476703	0.233666	-0.566907	-0.629495	0.628433	-0.50422	0.47537	-0.577962	-0.657923	0.804058	0.123271	-0.00411007
cDC2	-0.634806	-0.33558	-0.351514	-0.390844	-0.497583	-0.511551	-0.541049	0.229441	0.28313	0.206372	-0.697369	0.76914	0.611505	0.532607	-0.60228	-0.544684	-0.293539	0.143542	0.0352326	0.255698	0.558891	-0.62248	0.253605	0.73901	0.460393	-0.208037	0.386395	-0.0953854	-0.437114	0.844702	-0.651371	0.392895	-0.67838	-0.790628	0.805111	0.295458	0.361755
cDCs	-0.494753	0.27144	0.109124	-0.453878	-0.601721	-0.257244	-0.338674	-0.0381448	0.448221	0.516192	-0.629387	0.561671	0.442347	0.331477	-0.537778	-0.641096	-0.381416	0.426514	0.548432	-0.00849726	0.356333	-0.338052	0.235552	0.663236	0.558642	-0.462252	0.246415	-0.232998	-0.00525222	0.670335	-0.662853	-0.083069	-0.79474	-0.650325	0.751041	0.0364263	-0.0740215
Central memory CD4+ T cells	-0.523149	0.668625	0.612832	-0.48081	-0.629062	-0.293131	-0.342605	-0.273467	0.697754	0.718843	-0.607811	-0.437079	-0.130707	0.523655	0.385239	0.340876	0.41287	0.714478	0.603747	-0.446282	-0.244409	-0.515715	-0.242487	-0.263467	-0.365434	-0.600387	-0.48748	-0.443073	0.137303	0.142576	-0.154391	-0.664754	-0.639538	-0.407463	0.701354	-0.402419	0.132495
Cytotoxic CD8+ T cells	-0.672095	-0.288142	0.591834	-0.854382	-0.764687	-0.653856	-0.75504	-0.770277	0.894565	0.909678	-0.676095	0.860391	0.765624	0.745008	-0.400416	-0.414266	0.520249	0.474545	0.0711293	-0.18978	-0.0689299	-0.862761	0.0737286	0.770293	0.88712	-0.219615	0.351152	0.0354696	0.0985561	-0.242575	-0.787829	-0.0670912	-0.681003	-0.695106	0.874276	0.355224	-0.739663
Cytotoxic NK cells	-0.705932	-0.391254	0.549057	-0.828048	-0.686741	-0.693018	-0.7614	-0.664951	0.874891	0.869457	-0.76306	0.816358	0.792849	0.793178	-0.45299	-0.527247	0.536671	0.384833	-0.0897357	-0.0452894	0.0357039	-0.778934	0.095063	0.775615	0.918703	-0.0812536	0.382924	0.129286	0.382853	0.166207	-0.791803	-0.0817004	-0.68822	-0.782222	0.852877	0.285144	-0.707294
DCreg	-0.701341	-0.554614	-0.569255	0.0495001	-0.463138	-0.707371	-0.845945	-0.546232	0.627085	0.469382	-0.860647	-0.143249	-0.257168	0.246217	0.054208	0.016129	0.628884	-0.428742	-0.633054	0.467193	0.526544	-0.359369	0.165987	0.850289	0.7267	0.196655	0.693315	0.58532	-0.265607	0.868852	-0.802301	0.641394	-0.682923	-0.733445	0.808232	0.0674797	-0.0803112
Effector/memory CD4+ T cells	-0.678859	0.0139635	0.490504	-0.656277	-0.441069	-0.475237	-0.303152	-0.0608072	0.781456	0.673982	-0.659183	0.717843	0.563613	0.537898	-0.517677	-0.515066	-0.114016	0.515991	0.388435	-0.0353571	-0.22294	-0.466554	0.0176438	0.585019	0.526148	-0.479217	-0.194642	-0.353277	-0.386602	0.381021	-0.210666	-0.427242	-0.461602	-0.479693	0.264135	-0.0442596	-0.323154
Effector/Memory CD8+ T cells	-0.751345	-0.464167	0.233218	-0.726872	-0.684735	-0.680237	-0.646653	-0.725716	0.709578	0.808597	-0.728435	0.662282	0.729658	0.698875	-0.315348	-0.453734	0.392822	0.0624108	-0.341031	-0.0282063	0.0756808	-0.513367	-0.480863	0.704773	0.821179	-0.557805	0.204461	0.0709128	0.0444395	0.468428	-0.485148	-0.389858	-0.232997	-0.496056	0.76702	0.521268	-0.472331
eMDSC	0.09042	-0.234231	-0.402071	-0.681535	-0.759268	-0.649886	0.140987	0.384588	0.327924	0.359304	-0.899135	0.809656	-0.208589	0.0958892	-0.305958	-0.176492	0.473708	-0.741606	-0.815932	-0.167347	0.419285	-0.369705	0.249025	0.952033	0.865603	0.391402	0.683597	0.57789	-0.564442	0.898418	-0.784821	0.14807	-0.871251	-0.943515	0.928005	0.325414	0.481149
Eosinophils	-0.552758	-0.460873	0.250771	-0.45217	-0.455559	-0.336881	-0.212884	-0.265634	0.608232	0.605712	-0.550394	0.60318	0.5679	0.590551	-0.296413	-0.343524	-0.199043	0.364526	-0.0707872	-0.113154	0.0709463	-0.380467	0.0529247	0.684061	0.589761	-0.203172	0.308068	-0.0592938	-0.139532	0.495981	-0.535406	-0.230048	-0.481718	-0.575503	0.607437	-0.082228	0.0701247
Exhausted CD8+ T cells	-0.562183	-0.0112113	0.510317	-0.733439	-0.81546	-0.464101	-0.631135	-0.666584	0.856316	0.851563	-0.734544	0.838782	0.792005	0.696192	-0.438517	-0.578388	0.421717	0.455703	0.0804774	-0.489484	-0.357081	-0.75989	0.168112	0.750486	0.786211	-0.677474	-0.333647	-0.323135	-0.37727	0.0297725	-0.721339	-0.565645	-0.673931	-0.448483	0.835165	0.491053	-0.59107
Exhausted NK cells	-0.674605	-0.45701	0.340111	-0.77064	-0.651913	-0.640619	-0.749781	-0.598666	0.772108	0.766409	-0.797973	0.814738	0.799392	0.700605	-0.568605	-0.598519	0.356262	-0.00569705	-0.54771	0.168604	0.175388	-0.692268	0.068464	0.902283	0.790999	-0.139731	0.417853	0.328779	0.263147	0.625386	-0.776663	0.0153819	-0.730481	-0.762994	0.804471	0.27139	-0.442019
G-MDSC	-0.33684	-0.464904	-0.136232	-0.589477	-0.589364	-0.433344	-0.115336	-0.597318	0.492659	0.603281	-0.479119	0.499025	0.124923	0.52948	-0.397539	-0.131211	-0.0142601	0.397401	0.158414	-0.234767	-0.102466	0.0652225	0.217923	0.696895	0.55169	-0.206111	0.441827	-0.155616	-0.304768	0.678315	0.174491	-0.369402	-0.676903	-0.739537	0.806227	-0.479442	-0.0765941
ɣδ T cells	-0.687769	-0.376243	0.586097	-0.744083	-0.789478	-0.622217	-0.768965	-0.823216	0.879259	0.930595	-0.823754	0.632332	0.571878	0.7902	-0.148224	-0.37265	0.644101	0.0504291	-0.0579268	-0.098368	-0.0689114	-0.78214	0.205248	0.817208	0.91701	-0.128183	0.358546	0.235161	0.0539813	0.500675	-0.787572	0.102448	-0.768562	-0.8125	0.822767	0.041024	-0.364355
Lipid-Associated Macrophages	-0.570438	0.327393	0.349672	-0.383078	-0.686986	-0.468514	-0.492621	-0.686632	0.357062	0.274647	-0.591219	-0.0454724	0.0508735	0.403584	-0.254715	-0.324032	0.102207	-0.0721196	-0.199175	-0.349275	0.295153	-0.440803	0.238849	0.765968	0.557146	0.0376461	0.282105	0.0368145	-0.188789	0.794852	-0.715279	-0.197188	-0.839835	-0.696606	0.757929	0.542644	0.0671214
Lymphatic Endothelial cells	-0.203344	-0.442861	-0.492686	0.095548	-0.117279	-0.45878	-0.40977	0.505636	-0.065052	-0.446666	-0.484642	0.331504	0.334008	0.473069	-0.29813	-0.477457	-0.482344	-0.119425	-0.200632	0.265838	0.370912	0.101196	0.356026	0.49542	-0.20676	-0.457855	-0.0111784	0.216858	0.444522	0.305426	-0.425641	-0.0246893	-0.156942	0.118193	0.327895	-0.186412	0.216221
M-MDSC	-0.726646	-0.55201	-0.359279	-0.654164	-0.568257	-0.56952	-0.0561891	-0.641995	0.547769	0.634395	-0.745976	0.379936	-0.0503441	0.520607	-0.566556	-0.312363	0.0131084	0.453354	0.161093	-0.0757976	0.194922	0.214651	0.332845	0.696186	0.634275	-0.178927	0.460118	0.0386687	-0.259884	0.788934	-0.00834491	-0.0810834	-0.782501	-0.847467	0.793762	-0.368334	0.0731902
Macrophage	-0.726286	-0.0670866	0.048782	-0.213063	0.164387	-0.451915	-0.836315	-0.918091	0.0237374	0.0618247	-0.670746	0.502367	0.25593	0.413046	-0.106882	-0.420454	-0.586033	0.0936088	-0.164708	0.754764	0.817933	-0.722201	0.42529	0.76182	0.405855	0.791482	0.680206	-0.404974	-0.494463	0.554886	-0.638467	0.822954	-0.764806	-0.826855	0.654382	0.0966151	-0.460632
Mast Cells	0.0363195	-0.531278	-0.493293	-0.51944	-0.698426	-0.291143	0.851186	0.817334	0.549612	0.365063	-0.0205802	-0.0393221	-0.55154	-0.247193	-0.860557	-0.856253	-0.971528	-0.572144	0.0603506	0.0671552	0.469414	-0.0933114	-0.10178	0.511006	-0.17594	0.617944	0.779895	0.539344	0.33713	0.695119	0.444952	-0.584181	-0.6159	-0.149681	0.753413	-0.083842	0.375296
Memory B cells	-0.694875	-0.253854	0.373869	-0.643568	-0.552663	-0.538995	-0.398813	-0.476551	0.778779	0.724355	-0.690031	0.825748	0.774731	0.703167	-0.359177	-0.305603	-0.234443	0.424383	0.50042	-0.116229	-0.0396961	-0.800557	0.181232	0.720254	0.553601	-0.392594	-0.0239473	-0.443058	-0.358122	0.385311	-0.719584	-0.0316251	-0.42254	-0.704176	0.671392	0.334861	-0.0999659
moDCs	-0.467379	-0.00354228	-0.0898661	-0.0118018	-0.275201	-0.65567	-0.642083	-0.353371	0.478768	0.47358	-0.658257	0.43253	0.596395	0.708493	-0.586317	-0.719711	-0.241954	0.249227	0.17831	-0.244037	0.33024	-0.49301	0.267835	0.845744	0.732356	-0.0644262	0.547634	-0.417509	-0.501822	0.806846	-0.807165	0.116935	-0.760565	-0.686734	0.798631	0.184804	0.154797
Monocytes	-0.675207	-0.435105	-0.336138	-0.50716	-0.603488	-0.614949	-0.786682	-0.44558	0.641412	0.592091	-0.685905	0.365571	0.449464	0.681994	-0.647112	-0.564652	-0.160658	0.516292	0.315417	0.0401472	0.438652	-0.00262088	0.510448	0.783588	0.650802	-0.26141	0.386508	0.407231	-0.26975	0.801698	-0.295758	0.130523	-0.783576	-0.842707	0.810531	-0.41082	0.138749
Naïve B cells	-0.642729	-0.252887	0.128514	-0.495232	-0.578966	-0.55652	-0.241306	0.250134	0.397784	0.386519	-0.678489	0.49861	0.474181	0.544624	-0.0886641	0.0978338	0.0113794	-0.0591503	0.043902	-0.331657	0.139423	0.0771266	0.168018	0.432203	0.097354	-0.627976	-0.131072	-0.100015	-0.215761	0.513971	-0.404986	-0.416688	-0.502211	-0.45485	0.48152	-0.234069	-0.0793375
Naïve CD4+ T cells	-0.561517	0.0723125	0.484703	-0.479245	-0.270033	-0.520878	-0.59713	-0.425569	0.655678	0.768629	-0.521163	0.773676	0.706045	0.718096	-0.174406	-0.300701	-0.235719	0.287598	0.424158	0.182627	0.138853	-0.727474	0.637536	0.44514	0.456454	-0.526177	-0.359536	-0.571866	-0.703421	-0.0881169	-0.465242	-0.349077	-0.696402	-0.780125	0.377406	0.155642	-0.671888
Naive CD8+ T cells	-0.604399	-0.295322	0.358114	-0.677011	-0.718468	-0.570325	-0.694839	-0.545445	0.853546	0.846733	-0.628306	0.715733	0.627563	0.743432	0.250229	0.0489882	0.54872	-0.00172302	-0.124225	-0.486661	-0.257437	-0.798344	0.12562	0.750606	0.834379	-0.601128	-0.0352099	0.182356	0.26446	0.328442	-0.70292	-0.437556	-0.377144	-0.648354	0.888367	-0.363606	-0.479061
Naive NK cells	-0.576462	-0.536219	0.465234	-0.719054	-0.553661	-0.65203	-0.642358	-0.521757	0.798411	0.828022	-0.65373	0.871117	0.839358	0.789514	-0.60268	-0.645599	-0.342963	0.290839	-0.239214	-0.119966	0.229048	-0.752192	0.369383	0.829614	0.7138	-0.082509	0.518522	-0.253537	-0.127334	0.319357	-0.79191	0.106467	-0.734102	-0.810262	0.769129	0.328914	-0.637683
Neutrophils	-0.827027	-0.70521	-0.0853311	-0.348715	-0.462605	-0.671272	-0.0537572	-0.496974	0.793355	0.941319	-0.825374	0.36344	0.141665	0.560397	-0.4591	-0.134236	-0.278784	0.96328	0.937635	-0.559237	-0.701623	0.252081	0.544916	0.652663	0.768786	0.0145265	0.415172	-0.339996	-0.577896	0.547264	0.238922	0.079627	-0.684779	-0.904501	0.433177	-0.597846	-0.359732
NK cells	-0.567359	-0.304838	0.492455	-0.634313	-0.557725	-0.659526	-0.533473	-0.557705	0.754177	0.688236	-0.555061	0.468118	0.659082	0.602091	-0.319815	-0.45678	0.484978	0.42254	0.103648	0.0811183	-0.0228571	-0.710396	-0.221561	0.78902	0.629446	-0.239419	0.253106	0.175246	0.128226	0.0353745	-0.680033	0.23059	-0.577323	-0.748657	0.667825	-0.0744562	-0.580437
NKT cells	-0.649641	-0.426851	0.532602	-0.766824	-0.660017	-0.616	-0.667868	-0.765642	0.816608	0.732176	-0.672578	0.5804	0.62937	0.733736	-0.241596	-0.481927	0.54173	0.0719666	-0.157064	0.0234971	-0.0117927	-0.703731	0.0924581	0.88288	0.830454	-0.137342	0.319307	0.454008	0.133934	0.531459	-0.787642	0.102457	-0.731011	-0.852614	0.822841	-0.0346606	-0.417805
pDC	-0.351881	-0.554312	-0.249612	-0.432758	-0.584238	-0.480418	-0.365866	0.178806	0.653051	0.595381	-0.576471	0.611224	0.395086	0.569733	-0.595208	-0.629066	-0.382924	0.330447	0.0521641	-0.334876	0.12732	-0.452705	-0.297562	0.581306	0.22644	-0.426997	0.317321	0.0433214	0.123695	0.390875	-0.438375	-0.0764326	-0.293381	-0.335218	0.527724	0.120219	0.073821
Pericytes	0.437184	-0.10115	-0.531522	0.163087	-0.52768	-0.0528227	-0.0138106	0.546008	-0.0542128	0.115824	-0.370089	-0.510183	-0.769369	-0.23896	-0.154623	-0.483697	-0.545058	-0.206468	-0.00309646	-0.125709	0.596251	0.355714	-0.538592	-0.0791789	-0.555098	-0.781587	0.156832	0.534457	0.569496	0.49711	0.641639	-0.816613	0.0609414	0.341147	0.678723	-0.111535	0.598735
Plasma Cells	0.279345	-0.718248	0.132078	-0.629321	-0.0787142	0.105223	-0.730474	-0.816563	0.711352	0.780736	0.664074	0.697695	0.863842	0.891863	-0.719659	-0.875947	-0.93822	0.839009	0.601525	-0.170545	-0.082834	-0.0162411	0.0582759	0.278224	0.333647	-0.460076	-0.265192	-0.756512	-0.616528	0.255653	-0.274387	0.00340731	-0.250831	-0.819197	-0.288064	-0.143528	-0.665619
Pre-Exhausted CD8+ T cells	-0.73986	0.290881	0.743329	-0.732357	-0.574902	-0.611431	-0.113717	-0.741919	0.767368	0.743368	-0.563698	0.697475	0.538513	0.576991	-0.362053	-0.171982	-0.0536689	0.187918	0.0979957	-0.407627	-0.187469	-0.695346	-0.586876	0.237577	0.697269	-0.322927	0.268387	-0.0471364	0.140292	-0.475148	-0.82025	0.399256	-0.370676	-0.342296	0.723787	0.534275	-0.619268
Proliferating CD8+ T cells	0.622282	0.286013	0.322469	-0.544996	-0.184688	0.539727	-0.653314	-0.649791	0.57764	0.557004	0.647852	0.241682	0.133783	0.340274	0.721864	0.741458	0.520909	0.425402	0.477132	0.236328	-0.341586	0.796545	0.569988	-0.942875	-0.529475	0.16316	-0.648352	-0.965698	-0.812663	-0.959241	-0.800915	-0.417335	-0.808493	0.305983	-0.521608	0.712227	-0.845819
Resting CD4+ T cells	-0.40785	-0.71709	-0.564807	-0.691704	-0.639997	-0.567154	-0.474176	0.510311	0.123442	0.0779006	-0.736823	0.724458	0.523018	0.768541	-0.0716776	-0.511598	-0.0632984	-0.0944586	-0.550702	0.226723	0.225735	-0.374516	0.28678	0.735988	0.499354	0.2524	0.538068	0.17866	-0.312512	0.494385	-0.167985	0.204376	-0.471597	-0.134314	0.781903	-0.429822	-0.179491
Resting Memory CD4+ T cells	-0.557613	-0.471503	-0.277637	-0.304182	-0.587618	-0.443847	-0.156816	-0.460414	0.791277	0.727238	-0.828237	0.898269	0.81102	0.491613	-0.555843	-0.69911	-0.120392	-0.46339	-0.677343	0.364222	0.423811	-0.406064	-0.0359128	0.799767	0.663737	-0.290317	0.74607	-0.026901	-0.590343	0.834379	-0.701937	-0.33775	-0.816639	-0.747982	0.878497	0.199234	-0.698425
SPP1 Macrophages	-0.554782	-0.267773	-0.261962	-0.152788	-0.346158	-0.446782	-0.57593	-0.536881	0.363789	0.493073	-0.636434	0.139671	0.0829698	0.466216	-0.417016	-0.398555	0.408826	-0.152921	-0.425307	0.146708	0.448705	-0.598189	0.14712	0.766517	0.656255	-0.0294047	0.516596	-0.000403642	0.171147	0.803377	-0.658057	0.547137	-0.78407	-0.839256	0.847699	0.401523	-0.00405589
T cells	-0.793141	-0.224981	0.598386	-0.801479	-0.669398	-0.744497	-0.73817	-0.643578	0.847299	0.888007	-0.757767	0.97328	0.870522	0.808204	-0.568572	-0.556691	0.357498	-0.105851	-0.114907	-0.221744	0.0978256	-0.929478	0.244445	0.84703	0.833849	-0.228972	0.277561	0.157498	-0.0613315	0.51419	-0.785833	-0.063887	-0.799193	-0.802824	0.88998	0.521393	-0.443392
T follicular helper cells	-0.6346	-0.245367	0.433205	-0.692089	-0.735192	-0.654269	-0.648494	-0.636955	0.769238	0.753163	-0.691551	0.933184	0.831673	0.775783	-0.448053	-0.550915	0.333995	0.448909	0.272137	-0.462337	-0.296707	-0.725585	0.224564	0.726722	0.840588	-0.469044	0.108027	-0.63866	-0.589899	0.272028	-0.646959	-0.472302	-0.562684	-0.558814	0.859776	0.530123	-0.628478
Terminally Exhausted CD8+ T cells	-0.677232	-0.21534	0.626995	-0.771145	-0.712121	-0.649748	-0.678573	-0.87981	0.87402	0.879944	-0.656415	0.878509	0.750712	0.662278	-0.23454	-0.297376	0.461435	0.384339	-0.0102282	-0.267541	-0.355064	-0.788328	0.13342	0.753083	0.886851	-0.358461	-0.00381447	-0.192423	-0.0258078	-0.204732	-0.782369	-0.301793	-0.619689	-0.688098	0.848238	0.456141	-0.690396
Th1	-0.842105	-0.317717	0.0638842	-0.807944	-0.721062	-0.786739	-0.701112	-0.0403479	0.761365	0.658433	-0.711468	0.976688	0.907693	0.791312	-0.645835	-0.77719	-0.457724	0.310589	-0.0134493	0.307541	0.647763	-0.875729	0.426029	0.924729	0.883395	-0.00672457	0.504707	-0.0902448	-0.622165	0.847261	-0.865686	0.511065	-0.583834	-0.870259	0.634807	0.113109	-0.0364476
Tissue-Resident Memory CD8+ T cells	-0.65217	-0.236579	0.590799	-0.882298	-0.582155	-0.739844	-0.856298	-0.698543	0.868577	0.879697	-0.598691	0.881535	0.834454	0.798493	-0.524991	-0.575369	0.416375	0.192203	0.182109	-0.245398	-0.100571	-0.923505	0.00780199	0.903686	0.838443	-0.358232	0.050529	0.414721	0.448425	0.0308159	-0.718097	-0.0309389	-0.548035	-0.709725	0.908304	0.199983	-0.860726
Treg	-0.552332	-0.424089	0.180444	-0.629246	-0.77179	-0.420406	-0.253756	-0.42044	0.838923	0.820715	-0.745811	0.875729	0.811014	0.659362	-0.439314	-0.548495	-0.192228	0.569791	0.250045	-0.728456	-0.618	-0.730164	-0.0966921	0.65683	0.746591	-0.575525	-0.356106	-0.0909992	-0.192473	0.587391	-0.358228	-0.697776	-0.709968	-0.026294	0.63191	0.652121	-0.542741
Tumor Associated Neutrophil (TAN)	-0.37289	-0.374697	0.198259	-0.394707	-0.572635	-0.442038	-0.511763	-0.629516	0.516076	0.569996	-0.493565	0.53811	0.284563	0.502803	-0.321186	-0.371743	0.506886	0.423522	-0.265519	0.0641089	0.204857	-0.453188	0.0637414	0.824533	0.61022	0.239049	0.60512	-0.300345	-0.684697	0.440564	-0.635485	0.307182	-0.647959	-0.508724	0.744146	0.0337369	0.191761
Vascular Endothelial cells	0.427426	-0.463092	-0.469936	0.0253539	-0.594032	-0.579498	0.129394	0.508153	0.0724342	-0.574259	-0.388539	-0.171004	-0.645113	0.0459993	0.248154	-0.205307	-0.655778	0.515107	0.329268	-0.448992	0.437556	0.516913	-0.443068	0.12722	-0.2051	-0.712531	-0.098478	0.110469	0.699447	0.493738	0.40615	-0.59929	-0.422778	0.38235	0.548556	0.27256	0.630421

## Sheet: p-values
Supplementary Table 20. P-values from two-sided Wilcoxon rank sum test for 61 TME gene sets
Cell types	pValue_BvsT1	mean(T1-B)	pValue_T1vsT2	mean(T2-T1)	pValue_BvsT2	mean(T1-B)_1	pValue_B_RvsNR	pValue_T1_RvsNR	pValue_T2_RvsNR
M0 Macrophages	0.733	-0.02	0.312	-0.096	0.875	-0.307	0.454	0.827	0.381
M1 Macrophages	0.301	0.156	0.188	0.408	0.125	0.185	0.188	0.115	0.095
M2 Macrophages	0.622	0.015	0.625	0.52	0.25	0.203	0.733	1	0.381
Activated CD4+ T cells	0.424	0.152	0.625	0.446	0.25	0.257	0.454	0.51	0.381
Activated CD8+ T cells	0.91	0.007	0.438	0.16	0.625	0.156	0.539	0.267	0.571
Activated DCs	0.016	0.177	1	0.437	0.375	0.013	0.304	0.221	0.381
Activated Mast Cells	0.97	0.012	0.625	-0.136	0.875	0.248	0.635	0.267	1
Activated Memory CD4+ T cells	0.85	0.097	0.188	0.589	0.25	0.36	0.635	0.743	0.095
Activated NK cells	0.91	0.06	0.438	0.807	0.25	0.273	0.24	0.221	0.857
Activated TANs	0.791	0.03	0.812	0.63	0.125	0.273	0.374	0.32	0.381
B cell	0.791	0.065	0.438	0.493	0.375	0.152	0.304	0.145	0.095
C1QC Macrophages	0.233	0.149	0.812	0.73	0.25	0.059	0.304	0.913	0.571
CAF	0.791	0.02	0.188	-0.099	1	0.357	0.635	0.661	0.571
Cancer Stem Cell	0.677	-0.08	0.438	0.078	0.625	-0.209	0.635	0.661	0.857
CD8+ T cells	0.569	0.158	0.438	1.101	0.125	0.323	0.142	0.038	0.571
cDC1	1	0.081	0.625	0.497	0.125	0.066	0.106	0.51	0.381
cDC2	0.791	0.168	0.625	0.622	0.125	0.148	0.454	0.743	0.381
cDCs	0.233	0.152	0.438	0.576	0.125	0.147	0.106	0.661	0.381
Central memory CD4+ T cells	0.47	0.1	0.812	-0.124	0.875	0.005	0.454	0.145	1
Cytotoxic CD8+ T cells	0.176	0.194	0.438	1.021	0.25	0.297	0.142	0.09	0.857
Cytotoxic NK cells	0.129	0.203	0.438	1.048	0.25	0.331	0.142	0.18	0.857
DCreg	0.97	0.019	0.812	0.538	0.375	0.02	1	0.661	0.571
Effector/memory CD4+ T cells	0.301	0.1	0.125	0.483	0.25	0.257	0.24	0.115	0.095
Effector/Memory CD8+ T cells	0.38	0.172	0.125	0.804	0.25	0.458	0.454	0.51	0.857
eMDSC	0.569	0.034	0.625	0.879	0.125	0.277	0.733	0.583	0.381
Eosinophils	0.622	0.109	0.438	0.449	0.25	0.242	0.733	0.221	0.19
Exhausted CD8+ T cells	0.97	0.081	0.312	0.876	0.25	0.361	0.054	0.069	0.381
Exhausted NK cells	0.47	0.15	0.312	0.942	0.125	0.325	0.24	0.32	0.095
G-MDSC	0.339	0.095	0.438	0.641	0.125	0.294	0.733	0.267	0.571
ɣδ T cells	0.677	0.154	0.625	0.866	0.25	0.248	0.304	0.115	1
Lipid-Associated Macrophages	0.791	0.123	1	0.475	0.375	0.041	0.142	0.51	0.571
Lymphatic Endothelial cells	0.91	0.029	0.312	0	1	0.259	1	0.441	0.095
M-MDSC	0.38	0.115	0.625	0.654	0.25	0.179	1	0.583	0.571
Macrophage	0.733	0.073	0.812	0.587	0.375	-0.084	0.635	0.827	0.19
Mast Cells	0.519	0.079	0.812	-0.087	0.875	0.18	0.635	0.661	0.381
Memory B cells	0.052	0.185	0.438	0.55	0.125	0.131	0.24	0.221	0.095
moDCs	0.569	0.135	0.812	0.59	0.25	0.15	0.106	0.583	0.381
Monocytes	0.301	0.1	0.625	0.594	0.25	0.152	0.539	0.441	0.571
Naïve B cells	0.042	0.181	0.312	0.328	0.125	0.184	0.539	0.267	0.19
Naïve CD4+ T cells	0.052	0.158	1	0.586	0.25	-0.05	0.106	0.052	0.19
Naive CD8+ T cells	0.151	0.14	0.188	0.753	0.25	0.461	0.142	0.09	0.857
Naive NK cells	0.11	0.236	0.625	0.816	0.125	0.081	0.106	0.115	0.095
Neutrophils	0.339	0.105	0.812	0.554	0.375	-0.07	0.945	0.32	0.571
NK cells	0.97	0.108	0.438	0.786	0.25	0.333	0.188	0.18	0.571
NKT cells	0.733	0.118	0.438	0.868	0.25	0.337	0.304	0.145	0.381
pDC	0.151	0.168	0.188	0.297	0.25	0.266	0.454	0.827	0.095
Pericytes	0.791	0.037	0.438	-0.416	0.25	0.288	0.635	0.145	0.857
Plasma Cells	0.092	0.208	0.438	0.325	0.625	-0.065	0.106	0.009	0.19
Pre-Exhausted CD8+ T cells	0.064	0.179	0.625	0.655	0.25	0.063	0.142	0.267	0.571
Proliferating CD8+ T cells	0.339	-0.012	0.062	-0.262	0.375	-0.735	0.188	0.145	0.571
Resting CD4+ T cells	0.519	-0.028	0.438	0.551	0.125	0.416	0.945	1	0.381
Resting Memory CD4+ T cells	0.424	0.006	0.188	0.883	0.125	0.357	0.374	0.661	0.19
SPP1 Macrophages	0.129	0.191	0.812	0.737	0.25	0.038	0.454	0.913	0.857
T cells	0.052	0.25	0.438	1.006	0.125	0.247	0.24	0.145	0.19
T follicular helper cells	0.622	0.177	0.125	0.958	0.125	0.361	0.076	0.145	0.381
Terminally Exhausted CD8+ T cells	0.677	0.147	0.312	0.954	0.125	0.29	0.076	0.052	0.571
Th1	0.339	0.157	0.625	0.707	0.125	0.113	0.374	0.377	0.095
Tissue-Resident Memory CD8+ T cells	0.021	0.229	0.188	1.068	0.125	0.416	0.076	0.145	0.381
Treg	0.85	0.034	0.312	0.558	0.125	0.226	0.304	0.221	0.19
Tumor Associated Neutrophil (TAN)	0.791	0.03	0.812	0.63	0.125	0.273	0.374	0.32	0.381
Vascular Endothelial cells	1	0.027	0.438	-0.454	0.25	0.195	0.374	0.267	0.857
