# Supplementary material for: Sequencing analysis reveals evidence of immune activation in advanced HER2 negative breast cancer responders treated with entinostat + nivolumab + ipilimumab
Source: Research Square preprint supplement (doi:10.21203/rs.3.rs-6580687/v1), 2025-06-09
Supplement: Supplementary file 4 [file 47e9494c4547a020423996bd.xlsx]

## Sheet: pam50_assignments
Supplementary Table 21. Results of PAM50 classification
samplename	basal	her2	luminal_a	luminal_b	normal	assignment	prolif_scores	ror_subtype	ror_group_subtype	ror_clinical	ror_group_clinical	ror_prolif	ror_group_prolif	ror_prolif_clinical	ror_group_prolif_clinical
R-2_Baseline	0.506471	-0.229681	-0.333117	-0.256429	0.180749	basal	-0.096311	49.8374	medium	NA	NA	37.655	medium	NA	NA
R-2_Post Run-in	0.483313	-0.17455	-0.339256	-0.292965	0.129988	basal	-0.0857613	50.1748	medium	NA	NA	38.3833	medium	NA	NA
R-2_Week 8	0.343978	-0.0639647	-0.204235	-0.127737	0.0835094	basal	0.311742	48.2724	medium	NA	NA	54.5776	high	NA	NA
R-14_Baseline	0.584038	0.0390895	-0.359969	-0.193431	0.109201	basal	0.188808	56.3302	high	NA	NA	51.8568	medium	NA	NA
R-14_Post Run-in	0.46114	-0.0153665	-0.194434	-0.199381	0.17998	basal	0.210868	47.9613	medium	NA	NA	50.4177	medium	NA	NA
R-6_Baseline	0.66473	0.0414406	-0.551212	-0.183385	0.00571429	basal	0.0197101	64.8601	high	NA	NA	47.3319	medium	NA	NA
R-6_Post Run-in	0.635822	0.0338535	-0.540456	-0.211044	0.00965186	basal	0.0173517	63.6972	high	NA	NA	46.8984	medium	NA	NA
R-6_Week 8	0.607011	0.0496038	-0.456327	-0.218247	-0.0212725	basal	-0.0961082	60.1776	high	NA	NA	41.5277	medium	NA	NA
R-9_Baseline	-0.237701	-0.249226	0.521501	-0.314389	0.403323	luminal_a	-0.278074	9.46855	low	NA	NA	20.4353	medium	NA	NA
R-9_Post Run-in	-0.343036	-0.0238232	0.560327	-0.246542	0.322719	luminal_a	-0.393964	11.7778	low	NA	NA	17.6266	medium	NA	NA
R-7_Post Run-in	-0.392374	-0.0669884	0.608082	-0.331244	0.349012	luminal_a	-0.449346	7.50437	low	NA	NA	14.0485	medium	NA	NA
R-20_Baseline	-0.61855	-0.0206007	0.536099	0.293212	-0.103724	luminal_a	-0.314886	20.4902	low	NA	NA	24.2372	medium	NA	NA
R-20_Post Run-in	-0.524574	-0.11789	0.540517	0.167783	-0.0321256	luminal_a	-0.385417	17.2483	low	NA	NA	19.848	medium	NA	NA
R-8_Baseline	0.617124	-0.260517	-0.325634	-0.452891	0.324097	basal	0.195429	46.3379	medium	NA	NA	47.786	medium	NA	NA
R-8_Post Run-in	0.543027	-0.345227	-0.248896	-0.426767	0.400403	basal	-0.0703328	41.9842	medium	NA	NA	35.8128	medium	NA	NA
R-24_Baseline	-0.258103	0.0396158	0.186939	0.163697	-0.126531	luminal_a	-0.264821	35.4671	medium	NA	NA	29.8387	medium	NA	NA
R-24_Post Run-in	-0.245042	-0.230732	0.522209	-0.276639	0.418872	luminal_a	-0.325297	10.3053	low	NA	NA	18.9173	medium	NA	NA
R-13_Post Run-in	-0.415184	-0.355975	0.586713	-0.142813	0.370525	luminal_a	-0.277199	7.18952	low	NA	NA	19.8863	medium	NA	NA
R-13_Week 8	-0.624601	-0.295037	0.747053	0.044851	0.183198	luminal_a	-0.343003	3.53736	low	NA	NA	17.0796	medium	NA	NA
R-10_Baseline	-0.424538	-0.0476831	0.247443	0.335414	-0.313613	luminal_b	-0.103664	33.7255	medium	NA	NA	35.8835	medium	NA	NA
R-10_Post Run-in	-0.334414	-0.136138	0.0571922	0.377632	-0.306466	luminal_b	0.0923203	41.4671	medium	NA	NA	45.3331	medium	NA	NA
R-10_Week 8	0.0806436	-0.19635	0.0886647	-0.176561	0.175648	normal	0.19512	32.0682	medium	NA	NA	45.3215	medium	NA	NA
R-12_Baseline	-0.58847	0.0508768	0.423397	0.373337	-0.184626	luminal_a	-0.249899	27.6993	medium	NA	NA	29.1309	medium	NA	NA
R-12_Post Run-in	-0.569967	0.164618	0.29514	0.452171	-0.299558	luminal_b	-0.233905	36.0941	medium	NA	NA	32.5857	medium	NA	NA
R-19_Post Run-in	-0.410324	-0.0411525	0.133541	0.193277	-0.109436	luminal_b	-0.262743	36.2366	medium	NA	NA	30.0497	medium	NA	NA
R-17_Baseline	0.566483	-0.052389	-0.338295	-0.264538	0.219784	basal	-0.0489716	52.8141	medium	NA	NA	40.9886	medium	NA	NA
R-17_Post Run-in	0.529761	-0.124373	-0.244184	-0.350837	0.308435	basal	-0.098711	46.2321	medium	NA	NA	36.871	medium	NA	NA
R-23_Week 8	-0.435102	0.108091	0.239472	0.33407	-0.252629	luminal_b	-0.181801	36.2659	medium	NA	NA	34.1231	medium	NA	NA
R-16_Post Run-in	0.623914	-0.159184	-0.433373	-0.408403	0.327443	basal	0.232693	53.0678	high	NA	NA	51.5589	medium	NA	NA
R-16_Week 8	-0.00696279	-0.171573	0.22449	-0.278271	0.38958	normal	0.0671727	24.6665	medium	NA	NA	38.3264	medium	NA	NA
R-4_Baseline	-0.54958	-0.192605	0.650996	0.113373	0.0666026	luminal_a	-0.313622	10.539	low	NA	NA	20.5488	medium	NA	NA
R-4_Week 8	-0.638896	-0.0693878	0.413301	0.342329	-0.0879232	luminal_a	-0.309977	25.5856	medium	NA	NA	25.6973	medium	NA	NA
R-18_Baseline	-0.275774	-0.0563265	-0.00360144	0.278752	-0.289028	luminal_b	-0.0910827	43.7948	medium	NA	NA	38.7792	medium	NA	NA
R-18_Post Run-in	-0.247923	-0.052389	-0.00869148	0.217767	-0.198944	luminal_b	-0.111155	43.1818	medium	NA	NA	37.7118	medium	NA	NA
R-5_Baseline	0.548109	0.0171449	-0.367823	-0.265962	0.111514	basal	-0.299172	54.9431	high	NA	NA	31.915	medium	NA	NA
R-5_Post Run-in	0.42959	-0.0126294	-0.162981	-0.283512	0.252395	basal	-0.297045	45.1345	medium	NA	NA	29.3753	medium	NA	NA
R-15_Baseline	-0.236591	0.0101321	0.445762	-0.261945	0.20509	luminal_a	-0.195978	17.2946	low	NA	NA	26.9693	medium	NA	NA

## Sheet: TNBCtype
Supplementary Table 22. Results of TNBCtype classification
	classification coefficients						Assigned subtype
Sample	IM	BL1	MSL	M	BL2	LAR		correlation	p.value
R.5_Baseline	-0.370971	0.607358	-0.369178	0.486148	-0.259994	-0.425891	BL1	0.607358	0
R.5_Post.Run.in	0.115591	0.680956	-0.545669	-0.0207397	-0.30007	-0.357713	BL1	0.680956	0
R.14_Baseline	0.692003	0.0539124	-0.0174401	-0.648392	-0.23404	0.0999329	IM	0.692003	0
R.14_Post.Run.in	0.646977	-0.0985811	0.146709	-0.622408	-0.0503314	0.115424	IM	0.646977	0
R.6_Baseline	-0.444595	0.555958	-0.260733	0.502652	-0.205085	-0.300984	BL1	0.555958	0
R.6_Post.Run.in	-0.429981	0.556659	-0.275504	0.473994	-0.187841	-0.301215	BL1	0.556659	0
R.6_Week.8	-0.0880386	0.485198	-0.246577	0.226599	-0.108233	-0.26524	BL1	0.485198	0
R.8_Baseline	0.178235	-0.0325886	-0.157421	-0.246421	0.164903	-0.112583	UNS	NA	NA
R.8_Post.Run.in	-0.0537327	-0.0265765	-0.221028	-0.0691664	0.301485	-0.109166	BL2	0.301485	0
R.16_Post.Run.in	0.0274078	-0.169302	0.157645	0.132952	-0.244201	-0.180326	MSL	0.157645	0
R.16_Week.8	0.609521	-0.600114	0.526272	-0.578187	0.198212	0.167332	IM	0.609521	0
R.9_Post.Run.in	-0.361558	-0.711879	0.501563	0.13986	0.521792	0.453259	UNS	NA	NA
R.15_Baseline	-0.629069	-0.599645	0.295888	0.464224	0.252746	0.607258	LAR	0.607258	0
