# Supplementary material for: Sequencing analysis reveals evidence of immune activation in advanced HER2 negative breast cancer responders treated with entinostat + nivolumab + ipilimumab
Source: Research Square preprint supplement (doi:10.21203/rs.3.rs-6580687/v1), 2025-06-09
Supplement: Supplementary file 5 [file 4b9bd02440e5afc983fb7d11.xlsx]

## Sheet: Sheet1
Supplementary Table 3. Ratio of final RECIST reads over baseline for responder and non-responder at different metastatic sites: .
Patient ID	Metastatic site
	Liver	Lung	Lymph node	Breast	Chest	Peritoneal/ retroperitoneal	Axillary	Skin	Adrenal	Pleural	Other
Responders
R-18		0.533333	0.3125	0.1875
R-5		0	0		0
R-2			0.52					0
R-14			0.75
R-16		0.418605	0.2
Non-responders
R-13	1.08333
R-12	1.40136
R-19	1.04819		0.566667
R-4	2.30645	0
R-24	1.16481
R-9	1.17391					1.11628					0.684211
R-17	1.2			1.15625
R-10							0.752577		1.03571
R-20						0.977901
R-23		1.04348								1.09091
R-6				1.11538	1.09231			1.06557
R-8		0.769504	0.588235		1.64422
R-7		0.862069				0.684211
R-15				1.39394
