# Supplementary material for: Sequencing analysis reveals evidence of immune activation in advanced HER2 negative breast cancer responders treated with entinostat + nivolumab + ipilimumab
Source: Research Square preprint supplement (doi:10.21203/rs.3.rs-6580687/v1), 2025-06-09
Supplement: Supplementary file 6 [file 9e2bd668a41b02db60d8e104.xlsx]

## Sheet: n_samples
Supplementary Table 1. The number of samples across timepoints and RECIST							Supplementary Table 2. The number of samples by biopsy site and timepoint
	Timepoint							Timepoint
RECIST	Baseline	C1D1	Week_8				Biopsy site	Baseline	C1D1	Week_8	Total
Non-responder	10	11	5				Breast	2	2	0	4
Responder	4	5	2				Chest_Wall	3	3	2	8
Total	14	16	7				Liver	4	4	2	10
							Lung	0	2	1	3
							Lymph_Node	4	4	2	10
							Omentum	1	1	0	2
