# Supplementary material for: Sequencing analysis reveals evidence of immune activation in advanced HER2 negative breast cancer responders treated with entinostat + nivolumab + ipilimumab
Source: Research Square preprint supplement (doi:10.21203/rs.3.rs-6580687/v1), 2025-06-09
Supplement: Supplementary file 7 [file d21b57e8ae1f9d8eef3e45c3.xlsx]

## Sheet: B_R_vs_NR_DEgenes
Supplementary Table 9. The results of DE analysis between responders and non-responders at baseline performed by DESeq2.
Gene	baseMean	log2FoldChange	lfcSE	pvalue	padj
A1BG	3401.04	-0.0168898	0.215607	0.652323	0.909336
A1BG-AS1	353.461	-0.0367623	0.207557	0.60754	0.894589
A1CF	1890.55	-0.0132069	0.219087	0.036344	0.315069
A2M	46286	-0.0444635	0.212233	0.515775	0.854532
A2M-AS1	35.3399	0.362396	0.711066	0.0163326	0.216528
A2ML1	225.311	0.00750083	0.218099	0.32866	0.75598
A3GALT2	22.4447	0.00637858	0.203502	0.935231	0.988463
A4GALT	1219.29	0.0643767	0.215696	0.392719	0.793867
AAAS	1660.98	0.0992533	0.185242	0.371475	0.780974
AACS	2450.59	0.116248	0.240474	0.166477	0.594405
AADAC	1395.57	-0.0754054	0.23789	0.00115487	0.0588584
AADAT	871.829	-0.0492204	0.21744	0.408831	0.804286
AAED1	798.326	0.0772338	0.214334	0.379172	0.785469
AAGAB	2113.32	0.00459838	0.180853	0.962453	0.99219
AAK1	5290.03	0.110504	0.211505	0.291609	0.726636
AAMDC	329.045	-0.0645	0.207945	0.456159	0.831274
AAMP	3327.04	-0.00766085	0.188584	0.932797	0.987804
AANAT	3.57172	0.0186735	0.215382	0.658718	0.912249
AAR2	1079.02	-0.0340534	0.175945	0.746428	0.93862
AARD	4408.75	0.0176434	0.217318	0.558243	0.872957
AARS	8917.46	0.0281239	0.197053	0.752836	0.940047
AARS2	2118.1	-0.0997147	0.208407	0.343432	0.763271
AARSD1	4.46155	0.0639741	0.228936	0.0921612	0.477892
AASDH	2282.75	0.0632686	0.205063	0.456529	0.831478
AASDHPPT	1264.61	0.00397725	0.18413	0.98968	0.998403
AASS	2041.91	-0.0375689	0.214532	0.504175	0.851134
AATF	2548.51	0.061775	0.17416	0.548083	0.868466
AATK	571.988	-0.0557747	0.22605	0.0455423	0.350637
ABAT	2024.57	-0.0684506	0.22943	0.0830077	0.457095
ABCA1	11603.2	0.246565	0.357001	0.0508013	0.369358
ABCA10	1208.83	0.0483246	0.209019	0.520593	0.856694
ABCA11P	461.473	-0.252297	0.381304	0.0337638	0.301524
ABCA12	4623.94	-0.0162098	0.218779	0.161241	0.587914
ABCA2	17576.2	-0.0240284	0.21465	0.564396	0.875897
ABCA3	9694.04	-0.0591878	0.22685	0.0460235	0.352516
ABCA4	951.898	0.0329235	0.219072	0.361854	0.775654
ABCA5	3971.53	0.0983856	0.229324	0.238184	0.67847
ABCA6	4117.2	0.0302942	0.212603	0.613079	0.896931
ABCA7	5092.05	0.115893	0.246371	0.138065	0.558482
ABCA8	2115.64	-0.126006	0.267022	0.0354377	0.310467
ABCA9	1968.93	0.0584058	0.220329	0.343312	0.763202
ABCB1	1136.26	0.106798	0.255683	0.00471386	0.119294
ABCB10	2172.14	-0.376326	0.309707	0.0274742	0.277823
ABCB11	1205.09	0.0214192	0.217645	0.488867	0.845555
ABCB4	2271.25	0.0395839	0.219641	0.336028	0.760559
ABCB5	33.3119	-0.0620043	0.228543	0.0727873	0.433986
ABCB6	1759.23	-0.0742275	0.222129	0.24219	0.681719
ABCB7	2610.7	0.0681225	0.197352	0.482556	0.842502
ABCB8	2438.99	-0.0102919	0.2011	0.863302	0.971943
ABCB9	947.189	-0.0361051	0.213271	0.545774	0.868466
ABCC1	7149.76	0.378708	0.384964	0.0235147	0.26094
ABCC10	6153.48	0.0710796	0.224253	0.241139	0.680584
ABCC11	10023.2	-0.0158352	0.219284	2.56107e-08	3.47939e-05
ABCC13	27.5656	-0.0130018	0.218818	0.531707	0.861886
ABCC2	2340.16	-0.0342324	0.218828	0.35337	0.770062
ABCC3	6720.21	0.127921	0.251876	0.101357	0.497369
ABCC4	1785.94	1.53133	0.711942	0.000904168	0.0522714
ABCC5	10112.3	-0.0805101	0.232283	0.134728	0.553101
ABCC6	1911.58	-0.0624204	0.230056	0.000400453	0.0341552
ABCC6P1	241.922	-0.0505494	0.225987	0.00111168	0.0576135
ABCC6P2	48.8195	-0.0990029	0.252091	0.00173665	0.0721202
ABCC8	462.809	-0.00454613	0.218545	0.157162	0.581335
ABCC9	3232.4	-0.024486	0.211147	0.676863	0.91777
ABCD1	3910.76	0.0916925	0.229468	0.234045	0.673862
ABCD2	256.139	0.117892	0.265891	0.00184017	0.0742991
ABCD3	5622.35	0.0227615	0.205492	0.759141	0.941652
ABCD4	2144.31	0.101647	0.212863	0.303349	0.736401
ABCE1	6276.66	0.0392028	0.200978	0.650448	0.909203
ABCF1	4231.13	0.136615	0.198417	0.254426	0.691337
ABCF2	2816	-0.111177	0.217565	0.2833	0.718617
ABCF3	3901.11	-0.0287702	0.183354	0.770101	0.944997
ABCG1	3222.6	0.0166521	0.211532	0.746998	0.938785
ABCG2	440.046	-0.00419781	0.208106	0.941837	0.989539
ABCG4	31.6998	-0.0459724	0.220847	0.196208	0.630384
ABCG5	603.841	-0.017279	0.218703	0.194487	0.628502
ABCG8	859.733	-0.0128873	0.218942	0.0168578	0.21972
ABHD1	98.9504	-0.0407122	0.222414	0.0325547	0.29791
ABHD10	699.865	-0.0856724	0.200593	0.403579	0.800856
ABHD11	2104.35	-0.21214	0.347303	0.0327733	0.298539
ABHD12	2700.57	0.166313	0.258503	0.119455	0.526542
ABHD12B	49.8046	-0.00741688	0.218672	0.0148705	0.207098
ABHD13	900.353	0.28028	0.326292	0.0470437	0.356909
ABHD14A	446.04	-0.00738844	0.202157	0.958315	0.991847
ABHD14B	1493.38	-0.0846483	0.228475	0.189462	0.621187
ABHD15	624.754	0.00985877	0.204327	0.864665	0.972282
ABHD16A	2708.71	0.110645	0.166688	0.334592	0.760559
ABHD16B	17.2427	0.00229518	0.206411	0.974427	0.994571
ABHD17A	1611	0.0250867	0.168277	0.80905	0.957986
ABHD17B	632.146	0.107646	0.23237	0.219835	0.658161
ABHD17C	761.568	-0.0507762	0.209891	0.492841	0.847391
ABHD2	8247.05	0.0714068	0.225547	0.194763	0.628606
ABHD3	1374.41	-0.0247564	0.201104	0.76351	0.943096
ABHD4	1074.48	-0.261793	0.268698	0.0672062	0.419374
ABHD5	1299.13	-0.0582575	0.205756	0.509487	0.852732
ABHD6	468.881	-0.02074	0.209865	0.743	0.937156
ABHD8	746.969	-0.105132	0.199127	0.348793	0.765968
ABI1	7207.06	0.252057	0.378862	0.0422084	0.335901
ABI2	3224.04	-0.0269237	0.188343	0.76764	0.944269
ABI3	1249.76	0.0881982	0.212427	0.357016	0.772435
ABI3BP	2721.91	0.101861	0.242521	0.122834	0.532329
ABL1	32482.2	-0.0157207	0.189223	0.862648	0.971551
ABL2	7801.61	0.00567295	0.212982	0.755866	0.940891
ABLIM1	2345.63	-0.0560198	0.214063	0.445632	0.826405
ABLIM2	617.999	-0.0225646	0.214484	0.638447	0.905064
ABLIM3	2020.22	-0.0349865	0.212097	0.575855	0.881653
ABO	504.708	-0.104941	0.247951	0.0482937	0.360365
ABR	7883.31	-0.00541965	0.189376	0.953633	0.990933
ABRACL	2055.85	0.0502523	0.22263	0.171672	0.601678
ABT1	1072.79	0.0317084	0.183905	0.7577	0.94142
ABTB1	1840.16	-0.0618891	0.204417	0.467279	0.837036
ABTB2	1357.57	0.0429548	0.218262	0.407158	0.803594
ACAA1	2881.68	-0.0542616	0.218428	0.35075	0.767261
ACAA2	3076.47	0.000150748	0.212048	0.997766	0.999385
ACACA	13696.9	-0.104441	0.228014	0.227244	0.666508
ACACB	6990.86	-0.0603404	0.216856	0.37565	0.783171
ACAD10	3192.28	-0.0625736	0.20054	0.506291	0.851461
ACAD11	72.1795	0.00259005	0.204208	0.973054	0.99423
ACAD8	1401.84	-0.0576345	0.216311	0.400302	0.798673
ACAD9	4274.04	-0.293461	0.239626	0.047646	0.359329
ACADL	156.564	-0.0335528	0.219825	0.292773	0.728226
ACADM	3246.79	0.00830891	0.207144	0.902182	0.980115
ACADS	782.021	0.118837	0.247792	0.125122	0.536643
ACADSB	4107.51	-0.0252611	0.218603	0.241768	0.68148
ACADVL	14931.7	-0.0985122	0.200031	0.365811	0.777472
ACAN	1780.25	-0.0289707	0.217882	0.386447	0.790262
ACAP1	778.393	0.153535	0.301982	0.00178049	0.0728278
ACAP2	4548.9	-0.0703378	0.177813	0.527841	0.860177
ACAP3	5620.19	-0.00213147	0.205327	0.9724	0.994145
ACAT1	4802.11	-0.0157572	0.211617	0.7797	0.947499
ACAT2	1350.82	0.00888902	0.205049	0.900676	0.979812
ACBD3	6448.73	-0.167093	0.226918	0.188349	0.6208
ACBD4	1086.14	-0.016477	0.201026	0.833914	0.965146
ACBD5	2963.44	0.157266	0.261672	0.141083	0.563593
ACBD6	2079.62	-0.595664	0.310885	0.00345131	0.100527
ACBD7	132.603	0.0559801	0.225931	0.119998	0.527472
ACCS	1095.35	-0.0819388	0.215562	0.33238	0.759735
ACD	869.491	-0.0558723	0.205172	0.527606	0.860177
ACE	4043.01	-0.0353764	0.212375	0.514783	0.854044
ACE2	628.544	-0.0678033	0.233904	0.00425021	0.112904
ACER1	10.3253	-0.0604833	0.226834	0.12051	0.528145
ACER2	383.327	-0.16709	0.280728	0.0609975	0.401444
ACER3	986.395	0.0104873	0.187297	0.939698	0.989156
ACIN1	15515.4	-0.106738	0.214547	0.280495	0.715651
ACKR1	349.936	-0.00174395	0.21092	0.97924	0.996652
ACKR2	540.128	0.0455561	0.222845	0.138208	0.558548
ACKR3	1124.83	-0.0621328	0.221125	0.251689	0.688724
ACKR4	160.235	-0.017396	0.215879	0.551093	0.870074
ACLY	16464.2	-0.191466	0.280355	0.080719	0.451286
ACMSD	409.432	0.00366772	0.217452	0.847299	0.96808
ACN9	399.601	0.122454	0.262122	0.0371753	0.317929
ACO1	3516.22	0.0260096	0.208817	0.676688	0.91777
ACO2	9684.74	-0.0440378	0.190082	0.646376	0.907044
ACOT1	309.434	-0.00120453	0.20442	0.996848	0.999314
ACOT11	909.591	0.0621276	0.220356	0.337269	0.760812
ACOT12	396.381	-0.0150925	0.217482	0.515522	0.854412
ACOT13	786.219	0.143956	0.244371	0.161762	0.58821
ACOT2	1326.98	-0.0028719	0.209406	0.965257	0.992447
ACOT4	296.17	-0.0281267	0.215929	0.447169	0.826749
ACOT7	1184.96	0.105891	0.22973	0.225908	0.664728
ACOT8	876.847	-0.0887153	0.203269	0.374182	0.782598
ACOT9	1511.12	0.0993748	0.209603	0.329625	0.757091
ACOX1	4556.79	0.0632435	0.207848	0.462747	0.835052
ACOX2	1920.87	-0.0188536	0.219152	0.0774825	0.444293
ACOX3	2354.91	-0.131084	0.254652	0.105481	0.503884
ACOXL	208.978	0.0320194	0.220155	0.243965	0.682685
ACP1	1744.62	0.105798	0.193006	0.356776	0.772435
ACP2	2490.66	0.292569	0.273216	0.0518321	0.371457
ACP5	2874.38	0.29703	0.593913	0.00983527	0.171307
ACP6	874.082	-0.1364	0.270705	0.0325366	0.29791
ACPP	113.381	0.0267213	0.21023	0.661628	0.912871
ACR	55.9977	-0.0568256	0.220618	0.33292	0.759749
ACRBP	213.06	-0.0947041	0.214234	0.329841	0.757103
ACRC	697.274	0.621564	0.355447	0.00517523	0.124832
ACRV1	15.7363	0.0357804	0.221385	0.127605	0.54075
ACSBG1	10.632	-0.00379417	0.217461	0.803836	0.955859
ACSF2	1557.83	-0.0393357	0.205338	0.626865	0.90269
ACSF3	2144.98	-0.0486024	0.192155	0.626246	0.902485
ACSL1	9236.82	-0.00442472	0.213527	0.917297	0.98489
ACSL3	10879.9	0.062556	0.207576	0.474632	0.839312
ACSL4	4270.01	0.0598613	0.218748	0.342724	0.762873
ACSL5	2239.55	0.0214909	0.216058	0.54226	0.866268
ACSL6	323.503	-0.162453	0.316835	0.000861655	0.0510867
ACSM1	133.784	-0.118542	0.26686	0.000194301	0.0211177
ACSM2A	2051.51	-0.0303804	0.221599	0.00707759	0.148092
ACSM2B	2117.25	-0.0404405	0.223709	0.0100378	0.17309
ACSM3	651.229	0.0206777	0.216213	0.591925	0.8888
ACSM5	1256.29	-0.00375985	0.214012	0.930325	0.987464
ACSM6	11.2623	-0.0400395	0.222724	0.174199	0.604607
ACSS1	2072.06	0.209291	0.354046	0.0194606	0.23621
ACSS2	1605.89	-0.0902731	0.201621	0.389994	0.792234
ACSS3	1722.99	-0.0122559	0.21524	0.696604	0.923997
ACTA1	1569.26	-0.0581111	0.22383	0.25305	0.690104
ACTA2	26131	-0.0580408	0.215686	0.391469	0.792943
ACTA2-AS1	22.4512	-0.00152836	0.205564	0.982425	0.99683
ACTB	203435	-0.0382454	0.186156	0.708408	0.927082
ACTBL2	8.12008	0.0416815	0.223831	0.0239818	0.264119
ACTG1	106870	-0.0175431	0.1895	0.851475	0.968894
ACTL10	145.534	-0.0342961	0.21117	0.614523	0.897025
ACTL6A	3173.98	-0.027604	0.196261	0.750315	0.939554
ACTL6B	16.3715	-0.00184971	0.218485	0.242487	0.681756
ACTL7B	4.35077	-0.0145773	0.21862	0.193787	0.627677
ACTL8	60.1174	-0.011538	0.217011	0.65786	0.912193
ACTN1	40647.1	0.00548602	0.207394	0.930601	0.987464
ACTN2	475.649	-0.0156126	0.214866	0.71378	0.928067
ACTN3	32.9491	-0.00180078	0.213975	0.960832	0.991974
ACTN4	80249.3	1.24191	0.323916	7.44573e-06	0.00272342
ACTR10	2565.05	0.0433478	0.181382	0.690966	0.922454
ACTR1A	2448.24	0.0393613	0.17334	0.712154	0.928009
ACTR1B	2876.74	-0.375313	0.180739	0.00748695	0.15069
ACTR2	14410.2	0.265547	0.250781	0.0659138	0.416372
ACTR3	13207.9	0.0819599	0.213925	0.366478	0.777472
ACTR3B	1311.27	-0.159695	0.286626	0.0642233	0.411566
ACTR3C	1036.19	-0.0835526	0.209925	0.378829	0.785408
ACTR5	696.257	-0.0518654	0.189637	0.601331	0.893089
ACTR6	1778.61	-0.0796225	0.212563	0.374545	0.782928
ACTR8	1988.6	0.0398183	0.189225	0.685889	0.920884
ACTRT3	120.114	0.150824	0.278272	0.0681413	0.421205
ACVR1	2278.8	0.00678274	0.198598	0.930907	0.987464
ACVR1B	1521.87	-0.0742129	0.212278	0.365726	0.777447
ACVR1C	70.3866	0.0200107	0.214243	0.671512	0.91704
ACVR2A	1847.68	-0.0154186	0.196394	0.852921	0.969188
ACVR2B	1030.85	-0.0805994	0.21422	0.340285	0.761759
ACVRL1	1575.08	0.0111332	0.186442	0.908463	0.982776
ACY1	13.8901	-0.0740352	0.233066	0.0360874	0.314134
ACY3	93.4915	-0.0142222	0.21557	0.719754	0.930163
ACYP1	616.93	-0.0239239	0.192113	0.797209	0.953926
ACYP2	230.303	0.0408267	0.214223	0.506415	0.851461
ADA	832.604	0.00487569	0.201082	0.959855	0.991847
ADAD2	14.442	-0.0199439	0.211436	0.703752	0.926094
ADAL	621.973	-0.004583	0.205982	0.942581	0.989671
ADAM10	10476.8	0.498673	0.343309	0.0116693	0.186575
ADAM11	136.751	0.0210351	0.215161	0.559065	0.873157
ADAM12	4198.26	-0.0174357	0.207552	0.778788	0.947215
ADAM15	14732.8	-0.252748	0.415211	0.0282588	0.281358
ADAM17	6194.08	0.0857927	0.218016	0.332148	0.759684
ADAM19	2834.68	1.21403	0.339316	1.94924e-05	0.00529635
ADAM1A	508.562	-0.0054542	0.20939	0.912435	0.983649
ADAM20	447.403	-0.137358	0.25565	0.0953602	0.484701
ADAM20P1	80.2335	-0.0901811	0.234896	0.111188	0.513251
ADAM21	25.9985	-0.112715	0.255199	0.0508377	0.369409
ADAM21P1	3.98609	-0.029298	0.218187	0.421388	0.81347
ADAM22	449.706	-0.0302672	0.213278	0.600913	0.893089
ADAM23	196.031	-0.0206421	0.208348	0.753675	0.940241
ADAM28	1658.51	0.126159	0.261311	0.0537091	0.377512
ADAM32	521.511	-0.0159809	0.210711	0.79504	0.953156
ADAM33	385.502	-0.0348942	0.218945	0.20957	0.645928
ADAM8	2674.46	0.0399954	0.214591	0.505133	0.851287
ADAM9	16995.8	0.0099742	0.210332	0.855595	0.970042
ADAMDEC1	1316.57	0.0852701	0.242117	0.00164134	0.0702962
ADAMTS1	2570.82	-0.1224	0.24287	0.17516	0.605741
ADAMTS10	2688.87	-0.0597134	0.213578	0.403938	0.801219
ADAMTS12	4103.72	-0.0927663	0.234861	0.137161	0.556617
ADAMTS13	1368.03	-0.0861227	0.233571	0.0947539	0.482712
ADAMTS14	2537.65	-0.0480729	0.220559	0.24286	0.681902
ADAMTS15	1105.29	-0.0439514	0.22368	0.00684198	0.145808
ADAMTS16	1739.87	-0.0244672	0.220003	0.0200979	0.240224
ADAMTS17	785.909	-0.0143957	0.215504	0.657454	0.911959
ADAMTS18	292.709	-0.0030126	0.216018	0.923196	0.985743
ADAMTS19	172.164	0.0108585	0.218025	0.467197	0.836968
ADAMTS2	8465.63	-0.037861	0.214032	0.466297	0.836393
ADAMTS3	195.102	-0.0235351	0.20672	0.744641	0.937914
ADAMTS4	2210.45	-0.174271	0.312472	0.0248204	0.267499
ADAMTS5	1624.82	-0.0634027	0.215693	0.41971	0.811434
ADAMTS6	1235.57	-0.0844351	0.232699	0.106199	0.503968
ADAMTS7	1969.1	-0.0562207	0.216141	0.334604	0.760559
ADAMTS7P1	45.5293	-0.0583092	0.212948	0.423058	0.814595
ADAMTS8	104.657	0.0242465	0.218119	0.357127	0.772435
ADAMTS9	3698.04	-0.0434763	0.208855	0.517182	0.854996
ADAMTSL1	816.1	-0.0814084	0.228518	0.197431	0.632071
ADAMTSL2	1889.33	-0.0637269	0.222902	0.227787	0.666531
ADAMTSL3	1246.11	-0.0871283	0.234286	0.146355	0.571243
ADAMTSL4	3674.22	0.0158182	0.21236	0.769964	0.944997
ADAMTSL5	202.364	0.0180896	0.213036	0.692014	0.922629
ADAP1	903.421	0.0401517	0.216862	0.459822	0.833332
ADAP2	1796.6	-0.0668721	0.191115	0.537942	0.864745
ADAR	29271.3	0.0281224	0.194734	0.752521	0.940047
ADARB1	3221.3	-0.0145123	0.19439	0.870631	0.973488
ADARB2	42.979	0.0579019	0.226859	0.0876653	0.467581
ADAT1	1389.65	-0.0649047	0.201874	0.501813	0.849711
ADAT2	285.154	0.0981489	0.226858	0.252388	0.689053
ADAT3	402.97	-0.22514	0.264123	0.0892447	0.470595
ADCK1	516.302	-0.0434704	0.198924	0.630791	0.903377
ADCK2	2153.08	-0.408726	0.418832	0.0209878	0.245201
ADCK3	3227.34	-0.195943	0.303246	0.0723373	0.432931
ADCK4	1638.56	0.128963	0.242629	0.168326	0.597867
ADCK5	1113.24	-0.0435664	0.21063	0.545478	0.868418
ADCY1	3398.09	-0.0175323	0.218261	0.299018	0.733699
ADCY10	111.412	-0.00866047	0.212315	0.863988	0.972159
ADCY10P1	62.3178	0.120685	0.260438	0.0516771	0.371078
ADCY2	1006.59	-0.0565941	0.227153	0.0675735	0.419878
ADCY3	5769.29	-0.00115293	0.190624	0.989862	0.998403
ADCY4	1484.69	-0.0369538	0.192193	0.69853	0.924595
ADCY5	975.517	-0.0372912	0.218233	0.363016	0.775759
ADCY6	8353.8	-0.118174	0.259608	0.00972867	0.171176
ADCY7	6108.15	0.0601613	0.206865	0.491259	0.846355
ADCY8	5.8106	-0.0213108	0.219291	0.125381	0.537083
ADCY9	4205.35	-0.0603071	0.218253	0.296258	0.730846
ADCYAP1	117.498	0.00440902	0.211204	0.948283	0.99064
ADCYAP1R1	68.4163	-0.0684763	0.231685	0.0222581	0.253111
ADD1	10630.8	-0.020201	0.184981	0.908889	0.982946
ADD2	611.539	-0.00132716	0.214756	0.979696	0.996727
ADD3	5154.38	1.06905	0.36382	0.00012	0.0158646
ADGB	43.693	0.0255119	0.219403	0.152493	0.577198
ADH1A	4484.68	-0.024149	0.220303	0.00946172	0.16882
ADH1B	15603.3	-0.0439117	0.22268	0.156032	0.580234
ADH1C	3095.62	-0.0372714	0.222008	0.0459828	0.352441
ADH4	5378.98	-0.0401982	0.223672	0.00704752	0.148
ADH5	4023.26	0.0780469	0.217142	0.381959	0.786922
ADH6	1021.58	-0.0118189	0.21863	0.151543	0.575989
ADHFE1	1063.73	-0.0188267	0.212062	0.721316	0.930516
ADI1	2325.44	0.00870385	0.210239	0.911403	0.983148
ADIG	7.85833	-0.00138839	0.21491	0.967521	0.99336
ADIPOQ	99.014	-0.0335233	0.220202	0.273318	0.707293
ADIPOR1	4736.98	-0.213202	0.199136	0.101146	0.49672
ADIPOR2	3747.2	0.0419719	0.205171	0.608197	0.895003
ADK	2582.05	-0.0184339	0.198555	0.82423	0.962083
ADM	1058.41	0.016201	0.214856	0.66476	0.913763
ADM2	328.681	-0.0334347	0.209472	0.611164	0.896454
ADM5	93.0516	-0.0425674	0.21243	0.503939	0.851134
ADNP	12781.4	0.0305324	0.185299	0.763186	0.943096
ADNP2	3014.61	-0.0383191	0.177678	0.718621	0.929705
ADO	756.989	-0.150879	0.219928	0.206129	0.64114
ADORA1	2258.66	-0.128082	0.276068	0.00110622	0.0576135
ADORA2A	7.13166	-0.0558595	0.223398	0.245529	0.68427
ADORA2A-AS1	22.0311	0.00724423	0.218013	0.757986	0.941536
ADORA2B	158.615	0.000865262	0.211954	0.974394	0.994571
ADORA3	399.441	-0.102238	0.237458	0.178794	0.609828
ADPGK	2145.17	0.129034	0.198907	0.267689	0.701754
ADPGK-AS1	10.4182	0.0707633	0.227681	0.204981	0.640149
ADPRH	249.943	0.0410162	0.198266	0.66327	0.913353
ADPRHL1	300.045	-0.0958976	0.240473	0.0767555	0.442499
ADPRHL2	997.385	0.0285418	0.197874	0.751599	0.939799
ADPRM	256.026	0.130653	0.227716	0.23606	0.676592
ADRA1A	872.171	-0.0142721	0.216173	0.686815	0.920884
ADRA1B	138.015	-0.137597	0.272971	0.0431321	0.339536
ADRA1D	13.4315	-0.00610739	0.214012	0.878263	0.974595
ADRA2A	556.891	0.122315	0.249901	0.122243	0.531447
ADRA2B	63.5697	0.0097283	0.212649	0.849394	0.968311
ADRA2C	366.503	-0.0324999	0.21787	0.440059	0.82331
ADRB1	41.7215	-0.018428	0.216831	0.513084	0.854044
ADRB2	354.114	0.164673	0.269059	0.113025	0.515402
ADRB3	3.77106	0.0146839	0.218272	0.395738	0.795606
ADRBK1	13486.4	0.19933	0.272097	0.0911995	0.475547
ADRBK2	3739.75	0.059228	0.203703	0.517476	0.854996
ADRM1	5830.13	-0.0487454	0.194147	0.618384	0.899342
ADSL	2707.71	0.0472931	0.185463	0.649504	0.908715
ADSS	8156.22	-0.171654	0.222939	0.170092	0.600375
ADSSL1	692.871	-0.101022	0.23828	0.12702	0.539814
ADTRP	66.8903	0.133829	0.273775	0.0236708	0.26206
AEBP1	68610	-0.0484474	0.22036	0.244244	0.682825
AEBP2	2419.48	-0.0212962	0.194665	0.821791	0.961401
AEN	902.611	-0.0377596	0.187231	0.691413	0.922454
AES	9991.96	0.145085	0.248473	0.158167	0.583803
AFAP1	3037.59	-0.0931156	0.215103	0.324031	0.753129
AFAP1-AS1	162.437	-0.0144201	0.217521	0.422547	0.814351
AFAP1L1	1656.09	-0.142168	0.247614	0.137998	0.558482
AFAP1L2	988.785	-0.249289	0.374624	0.0429145	0.339334
AFF1	9912.64	0.0421295	0.193483	0.655781	0.910901
AFF3	6768.52	-0.0146335	0.218401	0.268788	0.702534
AFF4	9818.48	0.0118522	0.17165	0.9105	0.983148
AFG3L1P	155.327	-0.0454905	0.197759	0.638115	0.905064
AFG3L2	5240.61	-0.223897	0.367615	0.03341	0.30061
AFM	3200.69	-0.00741986	0.218594	0.110048	0.510267
AFMID	1737.14	-0.117925	0.25929	0.0141725	0.203046
AFP	26.3478	-0.00594642	0.217568	0.751618	0.939799
AFTPH	5252.79	0.431344	0.30695	0.0176738	0.225154
AGA	973.642	0.169088	0.266099	0.116399	0.521796
AGAP1	5619.79	-0.145917	0.246277	0.136245	0.554971
AGAP11	548.461	-0.0066715	0.205467	0.91659	0.984723
AGAP2	821.834	0.51272	0.827217	0.0136302	0.199791
AGAP2-AS1	587.911	-0.0211625	0.210796	0.68205	0.919652
AGAP3	6533.94	-0.0986718	0.213526	0.308858	0.740337
AGAP4	517.395	0.0649181	0.222868	0.287587	0.72191
AGAP6	3372.61	0.0849901	0.205961	0.388387	0.791505
AGAP7P	129.897	0.0226386	0.216342	0.508763	0.852732
AGBL1	16.0713	-0.0702492	0.232891	0.0625591	0.4061
AGBL2	339.718	-0.00507089	0.210834	0.919787	0.98532
AGBL3	200.147	-0.0840543	0.210609	0.382626	0.787613
AGBL4	145.273	0.0132644	0.215786	0.708421	0.927082
AGBL5	1889.85	-0.146466	0.241603	0.156655	0.580474
AGER	456.17	0.0656786	0.208122	0.4461	0.826405
AGFG1	6980.18	-0.0664567	0.201429	0.494511	0.847435
AGFG2	1512.08	-0.0144118	0.205934	0.83929	0.966974
AGGF1	5529.93	0.0258094	0.196354	0.772966	0.945759
AGK	1386.54	-0.560778	0.388242	0.0108226	0.180239
AGL	11002	0.0213487	0.214418	0.601662	0.893089
AGMAT	477.793	0.0246244	0.216891	0.530974	0.861493
AGMO	354.045	-0.022735	0.216619	0.528999	0.860918
AGO1	3894.76	0.00323351	0.194812	0.986234	0.997256
AGO2	11117.2	0.0261665	0.208436	0.700958	0.925177
AGO3	4804.33	0.179852	0.231023	0.150108	0.574183
AGO4	3075.09	0.13779	0.223916	0.242465	0.681756
AGPAT1	2130.61	0.0800697	0.164884	0.453198	0.829073
AGPAT2	2297.64	0.0342542	0.206201	0.639903	0.905124
AGPAT3	4685.03	-0.0586927	0.182412	0.580913	0.884778
AGPAT4	637.815	-0.00833913	0.206738	0.90214	0.980115
AGPAT4-IT1	99.9695	-0.0605202	0.22249	0.25327	0.690125
AGPAT5	1939.89	-0.0506045	0.216426	0.407861	0.803905
AGPAT6	7153.93	-0.0239249	0.2173	0.388048	0.791323
AGPAT9	291.688	-0.0281582	0.214586	0.592402	0.889303
AGPS	4178.64	0.192542	0.298693	0.0771044	0.44333
AGR2	4785.47	-0.0077044	0.218686	0.018959	0.233852
AGR3	1349.64	-0.00633698	0.218627	0.000870277	0.0510885
AGRN	25357.6	-0.067324	0.2164	0.385933	0.789845
AGT	5003.38	-0.0489856	0.224754	0.0449396	0.348309
AGTPBP1	3479.4	0.706403	0.51433	0.00669289	0.144696
AGTR1	376.106	-0.0376946	0.219215	0.289419	0.724358
AGTRAP	1254.37	0.0613292	0.211436	0.49037	0.8461
AGXT	5961.36	-0.00847634	0.218748	0.069043	0.423749
AGXT2	691.652	-0.00694198	0.216981	0.793745	0.95266
AHCTF1	17259.1	-0.0566652	0.189144	0.584551	0.886344
AHCTF1P1	868.391	-0.121916	0.223178	0.24477	0.683629
AHCY	4209.74	-0.126546	0.228366	0.234334	0.674348
AHCYL1	4248.93	0.0904322	0.19734	0.393129	0.793867
AHCYL2	1104.12	-0.0894425	0.192065	0.401716	0.799563
AHDC1	6598.9	-0.192984	0.278748	0.101407	0.497465
AHI1	6981.4	-0.0371509	0.196173	0.689314	0.921729
AHNAK	342997	-0.101386	0.23651	0.145747	0.569569
AHNAK2	36572.8	-0.0190668	0.216861	0.454236	0.829292
AHR	8141.6	0.192864	0.329392	0.036392	0.315198
AHRR	215.85	0.0452517	0.219426	0.352644	0.76945
AHSA1	3641.23	0.0654778	0.194268	0.51619	0.854722
AHSA2	2631.56	0.00451822	0.201236	0.951608	0.99082
AHSG	6403.32	-0.030886	0.221104	0.000892665	0.0517637
AICDA	8.45419	0.0490382	0.226504	0.00421032	0.112472
AIDA	3724.84	0.0204917	0.199244	0.807198	0.957164
AIF1	495.59	0.171487	0.306505	0.0274331	0.277689
AIF1L	1870.96	0.0352963	0.218668	0.399913	0.798534
AIFM1	2948.41	-0.0850836	0.216523	0.340269	0.761759
AIFM2	710.633	-0.0678704	0.214257	0.409151	0.804462
AIFM3	318.861	-0.0740626	0.229341	0.127781	0.54117
AIG1	1609.77	0.0327144	0.203068	0.689743	0.921855
AIM1	10553.2	0.0131913	0.21425	0.746804	0.938785
AIM2	520.349	0.0951381	0.248794	0.000874612	0.051185
AIMP1	2266.9	0.00372948	0.191914	0.967425	0.99336
AIMP2	1158.22	-0.0283465	0.165413	0.80111	0.954826
AIP	1688.23	0.0716966	0.156127	0.488007	0.844965
AIRE	11.0084	0.0185766	0.213873	0.699717	0.92511
AJAP1	112.063	-0.100845	0.246272	0.0395701	0.326063
AJUBA	951.334	-0.0878272	0.235548	0.106353	0.503979
AK1	1322.48	-0.141013	0.223853	0.194834	0.628606
AK2	3375.29	0.00856919	0.196816	0.929602	0.987419
AK3	1694.9	-0.00175266	0.199142	0.982497	0.99683
AK4	879.552	0.0338361	0.215058	0.535406	0.864026
AK5	227.673	-0.0366939	0.21616	0.43005	0.818454
AK7	123.583	0.00105724	0.214689	0.977899	0.996018
AK8	170.574	-0.0328426	0.21878	0.264254	0.699237
AK9	906.146	0.159614	0.297397	0.031486	0.294438
AKAP1	6641.71	-0.0163331	0.201832	0.822951	0.961854
AKAP10	2904.83	0.114906	0.202171	0.309536	0.740829
AKAP11	8108.43	0.0875044	0.184876	0.461021	0.834193
AKAP12	1742.99	0.0150636	0.204883	0.844501	0.967575
AKAP13	18297.1	0.238473	0.243868	0.0819129	0.454682
AKAP14	6.49167	0.0166208	0.218367	0.35551	0.771658
AKAP17A	5306.55	0.141038	0.255984	0.115575	0.520911
AKAP2	20.8474	0.0194764	0.204819	0.793181	0.952558
AKAP3	161.693	-0.015239	0.215634	0.643073	0.905988
AKAP5	197.619	0.00843426	0.208384	0.932894	0.987804
AKAP6	596.659	0.0187887	0.204417	0.801062	0.954826
AKAP7	469.893	0.0860009	0.233486	0.146453	0.571279
AKAP8	2796.88	-0.116806	0.203945	0.306921	0.738568
AKAP8L	5528.07	-0.0638993	0.205291	0.468236	0.837358
AKAP9	185554	-0.443376	0.316156	0.0144413	0.204981
AKIP1	677.46	-0.0132519	0.194012	0.886672	0.976973
AKIRIN1	2408.36	0.0812114	0.21979	0.327005	0.75426
AKIRIN2	1097.38	0.0933171	0.207015	0.39164	0.793016
AKNA	5582.52	0.510379	0.883758	0.0126935	0.193145
AKNAD1	11.041	0.0266679	0.218409	0.31528	0.745111
AKR1A1	3981.31	0.0330093	0.196841	0.71603	0.929179
AKR1B1	756.005	0.104581	0.21407	0.298512	0.733174
AKR1B10	134.94	0.00815483	0.216888	0.772904	0.945759
AKR1B15	175.806	-0.000881405	0.21819	0.845628	0.968025
AKR1C1	2060.16	0.0489389	0.223628	0.142991	0.565767
AKR1C2	1487.26	-0.000414237	0.21364	0.997424	0.999314
AKR1C3	1270.45	-0.0241419	0.210812	0.678077	0.918303
AKR1C4	1279.67	-0.0285712	0.220747	0.0221543	0.252927
AKR1CL1	128.587	-0.00571724	0.216411	0.822108	0.961546
AKR1D1	547.161	-0.0400327	0.223009	0.108473	0.507616
AKR1E2	865.326	2.76747	0.87886	4.51595e-05	0.00876464
AKR7A2	3385.34	-0.00750696	0.19853	0.923371	0.985743
AKR7A3	1204.27	-0.0203152	0.219213	0.0936153	0.480372
AKR7L	354.022	-0.0191678	0.218659	0.201003	0.636003
AKT1	70637.1	-0.0825523	0.229023	0.151435	0.575937
AKT1S1	1491.08	0.000343269	0.194237	0.991267	0.998888
AKT2	33500.3	0.226301	0.329542	0.0569817	0.388241
AKT3	24203.2	0.00152391	0.203082	0.984654	0.99683
AKTIP	1344.02	0.0818065	0.211781	0.381066	0.786181
ALAD	1253.91	-0.0956396	0.218226	0.284049	0.719485
ALAS1	2981.95	-0.00287966	0.203269	0.969157	0.993788
ALB	162821	-0.0528197	0.226581	0.016866	0.21972
ALCAM	8438.26	-2.7382	0.580582	1.13771e-07	0.000117972
ALDH16A1	2013.42	0.112626	0.223144	0.27015	0.70358
ALDH18A1	4350.54	-0.132226	0.211196	0.232277	0.671925
ALDH1A1	2983.53	0.0746304	0.22961	0.185908	0.618177
ALDH1A2	89.1508	0.0337272	0.216328	0.506443	0.851461
ALDH1A3	1992.09	0.0312476	0.211654	0.622091	0.901096
ALDH1B1	2260.4	-0.033657	0.217917	0.348393	0.765884
ALDH1L1	2021.71	0.0141573	0.217156	0.635897	0.905064
ALDH1L2	2397.3	0.177687	0.305494	0.0283881	0.281806
ALDH2	15385.2	0.00513714	0.212249	0.917857	0.985002
ALDH3A1	15.5415	0.073612	0.234755	0.034256	0.303328
ALDH3A2	4045.01	-0.0749894	0.21436	0.369177	0.779329
ALDH3B1	1359.81	-0.0216992	0.201633	0.755368	0.940891
ALDH3B2	9452.19	-0.0127472	0.218761	0.120577	0.528145
ALDH4A1	2468.26	-0.0795465	0.235197	0.0797142	0.450366
ALDH5A1	774.934	0.0574716	0.216519	0.366949	0.777472
ALDH6A1	3175.26	-0.0313683	0.216184	0.499364	0.848796
ALDH7A1	4913.48	-0.243595	0.398198	0.0337827	0.301524
ALDH8A1	916.459	0.0290775	0.21656	0.519466	0.855951
ALDH9A1	3687.19	-0.124418	0.223007	0.230916	0.670127
ALDOA	48383.5	0.0107892	0.207234	0.856989	0.970738
ALDOB	13157.8	-0.0422179	0.223881	0.000303724	0.0282953
ALDOC	663.563	0.00754813	0.214891	0.827855	0.963073
ALG1	1485.05	-0.00368074	0.186417	0.984873	0.99683
ALG10	1450.87	0.0626522	0.202067	0.50818	0.852495
ALG10B	1337.46	0.0157634	0.190284	0.866374	0.972499
ALG11	731.497	0.0582395	0.163861	0.597426	0.891604
ALG12	2969.69	-0.00192488	0.193522	0.982593	0.99683
ALG13	5819.09	-0.0256143	0.190157	0.785436	0.949412
ALG14	358.309	0.181204	0.270297	0.110881	0.512741
ALG1L	107.509	-0.0172736	0.214547	0.651974	0.909336
ALG1L2	56.7097	0.0913124	0.246717	0.00301676	0.0940636
ALG1L9P	119.862	-0.0650796	0.225551	0.153736	0.578416
ALG2	1367.09	0.0595714	0.190455	0.536684	0.86442
ALG3	1466.68	-0.0340854	0.195152	0.725511	0.931887
ALG5	1853.56	0.0973939	0.20769	0.369578	0.779828
ALG6	1508.92	0.00634343	0.203347	0.928835	0.987229
ALG8	2145.46	-0.183369	0.290881	0.0812826	0.452877
ALG9	1241.89	0.119277	0.218066	0.265426	0.699999
ALK	375.401	-0.126878	0.262544	0.0695689	0.425277
ALKBH1	567.681	-0.0308134	0.20444	0.680764	0.919451
ALKBH2	394.24	-0.140392	0.229295	0.195426	0.629785
ALKBH3	663.428	-0.159098	0.275408	0.0947429	0.482712
ALKBH4	414.842	-0.190733	0.292293	0.0858683	0.464027
ALKBH5	4247.93	-0.00171289	0.185289	0.986049	0.997217
ALKBH6	549.375	0.238298	0.390015	0.0314153	0.294199
ALKBH7	648.635	-0.0304204	0.204206	0.647482	0.907873
ALKBH8	944.915	0.0779657	0.186711	0.445699	0.826405
ALLC	16.7383	-0.0927488	0.244465	0.0258137	0.271484
ALMS1	16085.3	0.0467926	0.16483	0.661597	0.912871
ALMS1P	91.8568	-0.129134	0.249355	0.12697	0.539814
ALOX12	32.7461	0.0155444	0.217853	0.398759	0.797477
ALOX12B	13.5224	-0.00220051	0.216686	0.897303	0.978917
ALOX15	135.67	0.029481	0.218107	0.440211	0.823323
ALOX15B	2969.29	-0.0316301	0.221172	0.00135844	0.0639244
ALOX15P1	40.9661	0.0814169	0.237103	0.0356717	0.311596
ALOX5	3126.31	0.064517	0.222469	0.29381	0.728967
ALOX5AP	855.172	0.035758	0.217636	0.360586	0.774453
ALOXE3	57.8433	-0.0185458	0.219378	0.0211406	0.246289
ALPI	78.2233	-0.00360635	0.218456	0.0564459	0.386246
ALPK1	2502.25	0.0604379	0.208589	0.45846	0.832123
ALPK2	1494.88	0.106042	0.248556	0.0438947	0.343288
ALPK3	1273.82	-0.469508	0.59738	0.0185161	0.231264
ALPL	1368.64	-0.00389102	0.213931	0.925785	0.986522
ALPP	77.9996	0.00300713	0.218324	0.767884	0.94434
ALS2	3799	0.164505	0.190132	0.173991	0.60432
ALS2CL	1697.43	-0.0236554	0.212467	0.675621	0.917708
ALS2CR12	202.663	0.0180084	0.196884	0.833308	0.965021
ALX1	18.9061	0.0241753	0.220321	0.0381557	0.321685
ALX3	16.48	0.0299188	0.219532	0.182116	0.614397
ALX4	14.2065	0.00520018	0.215851	0.869858	0.973433
ALYREF	1492.21	-0.00635091	0.191703	0.943002	0.989758
AMACR	91.9583	-0.00731956	0.204125	0.921061	0.985667
AMBP	11109.6	-0.0210095	0.219234	0.112626	0.515402
AMBRA1	4161.67	-0.157685	0.176586	0.193211	0.627005
AMD1	6053.32	0.114899	0.256105	0.0544204	0.380056
AMDHD1	791.891	0.0201436	0.217159	0.491094	0.846355
AMDHD2	2427.04	-0.0534798	0.20496	0.508234	0.852511
AMER1	1203.95	-0.0462063	0.215123	0.437324	0.821766
AMER2	8.65571	-0.00342764	0.218098	0.803473	0.955839
AMER3	311.463	-0.00133746	0.218511	0.00125605	0.0610998
AMFR	7202.88	-0.0758443	0.210259	0.411952	0.806436
AMH	565.505	0.00560795	0.216328	0.828766	0.963196
AMHR2	12.9139	0.00944377	0.217312	0.612086	0.896526
AMICA1	347.384	0.2773	0.635296	0.00166974	0.0703725
AMIGO1	374.425	-0.0444035	0.213831	0.445768	0.826405
AMIGO2	1884.63	0.0437718	0.219256	0.304665	0.737334
AMIGO3	420.204	0.0181476	0.200327	0.814275	0.959599
AMMECR1	488.582	-0.0211993	0.204711	0.763183	0.943096
AMMECR1L	1106.45	-0.0450683	0.171291	0.677664	0.91826
AMN	165.223	0.0778815	0.23834	0.00882133	0.162895
AMN1	412.82	-0.0101721	0.205666	0.886556	0.976945
AMOT	1610.53	-1.28299	1.07234	0.00293154	0.0924676
AMOTL1	4979.8	0.016992	0.207518	0.798793	0.954457
AMOTL2	2805.56	-0.00891253	0.206611	0.88951	0.976989
AMPD1	73.6774	0.00792973	0.218107	0.25718	0.693564
AMPD2	3771.11	0.0596173	0.202752	0.510262	0.853053
AMPD3	2103.18	0.157058	0.280729	0.070403	0.428016
AMT	793.249	-0.0852363	0.216236	0.312983	0.743094
AMTN	413.419	-0.00970601	0.218544	0.20705	0.642707
AMY1B	6.05987	-0.0139837	0.216955	0.651055	0.909336
AMY2B	1644.36	0.0444727	0.208506	0.537671	0.864745
AMZ1	215.872	-0.00948637	0.217134	0.626879	0.90269
AMZ2	4891.71	0.137285	0.268038	0.0515764	0.371078
AMZ2P1	389.386	0.134716	0.244313	0.148192	0.5727
ANAPC1	7834.84	0.0124881	0.169925	0.908438	0.982776
ANAPC10	946.683	0.124191	0.216066	0.250871	0.688724
ANAPC11	1581.69	0.0167387	0.190591	0.859292	0.971375
ANAPC13	963.793	0.0965104	0.182438	0.392748	0.793867
ANAPC15	549.659	0.0232079	0.195243	0.799085	0.954598
ANAPC16	1171.7	-0.0965231	0.20514	0.364479	0.776496
ANAPC1P1	149.341	-0.111578	0.239769	0.177481	0.60809
ANAPC2	4838.63	-0.0160264	0.204333	0.816301	0.960141
ANAPC4	2891.43	0.0317689	0.162844	0.773276	0.945811
ANAPC5	6782.89	0.0882731	0.192669	0.416372	0.809236
ANAPC7	3301.44	-0.0507023	0.185731	0.597678	0.891734
ANG	1809.22	-0.0469172	0.221969	0.25947	0.694404
ANGEL1	1275.97	-0.00367742	0.185365	0.96963	0.993788
ANGEL2	2514.38	-0.215371	0.233211	0.10566	0.503901
ANGPT1	554.86	0.0488807	0.221959	0.186558	0.619529
ANGPT2	798.882	-0.0345933	0.210129	0.577555	0.882612
ANGPT4	4.91548	0.0289075	0.217925	0.442168	0.823925
ANGPTL1	212.344	-0.0175423	0.2085	0.796214	0.953472
ANGPTL2	2811.04	-0.0462487	0.217692	0.323892	0.753129
ANGPTL3	3494.56	-0.0135115	0.219058	0.152083	0.576392
ANGPTL4	991.464	0.0331676	0.218508	0.406108	0.803012
ANGPTL5	14.5716	-4.58528	1.3558	1.91438e-05	0.00527703
ANGPTL6	124.629	0.0253933	0.214732	0.604166	0.893634
ANGPTL7	330.786	0.0089079	0.218079	0.499371	0.848796
ANK1	397.04	-0.00569898	0.217123	0.743123	0.937156
ANK2	1161	0.0331398	0.205878	0.604102	0.893609
ANK3	5598.43	-0.149979	0.286437	0.0227352	0.255258
ANKAR	1255.97	0.0286652	0.192837	0.788326	0.950472
ANKDD1A	196.427	0.112385	0.244494	0.145717	0.569569
ANKDD1B	122.134	-0.0247672	0.210127	0.671224	0.917015
ANKEF1	894.239	0.028535	0.205127	0.67558	0.917708
ANKFY1	4081.12	0.0302437	0.167898	0.761205	0.942579
ANKH	4026.47	-0.354906	0.6593	0.0139156	0.20158
ANKHD1	208.544	0.0618233	0.197103	0.534369	0.863013
ANKHD1-EIF4EBP3	38.0477	-0.0396916	0.211791	0.547904	0.868466
ANKIB1	8732.92	-0.0305966	0.179736	0.77181	0.945317
ANKK1	45.1294	-0.0493004	0.219865	0.303961	0.737227
ANKLE1	119.211	0.116426	0.253935	0.0709129	0.42886
ANKLE2	7868.86	0.104582	0.209924	0.319554	0.74888
ANKMY1	2766.27	-0.0516618	0.215557	0.394609	0.795107
ANKMY2	1341.8	-0.00340805	0.192542	0.932548	0.987804
ANKRA2	1103.84	-0.0204832	0.195781	0.837557	0.96606
ANKRD1	65.9949	0.0334895	0.220276	0.146722	0.571571
ANKRD10	6723.56	-0.179658	0.268745	0.119407	0.526452
ANKRD11	16773	-0.000785112	0.184221	0.993745	0.999108
ANKRD12	12082.4	0.00775986	0.201443	0.9195	0.98522
ANKRD13A	2573.2	0.242499	0.320256	0.0657384	0.415725
ANKRD13B	1433.34	-0.0558565	0.222268	0.196199	0.630384
ANKRD13C	2383.73	0.0711588	0.174359	0.526142	0.859319
ANKRD13D	5276.69	-0.0109436	0.205822	0.860952	0.971466
ANKRD16	637.386	0.0215444	0.201304	0.782997	0.948331
ANKRD17	25880.4	0.0400984	0.161018	0.664553	0.913743
ANKRD18A	1230.69	-0.0647869	0.2303	0.00800673	0.155772
ANKRD18B	287.994	-0.0163258	0.217895	0.379141	0.785469
ANKRD19P	35.4359	0.0380359	0.218454	0.344515	0.763804
ANKRD20A11P	87.2879	-0.0976989	0.233064	0.176374	0.607063
ANKRD20A5P	646.991	-0.00488732	0.216756	0.818472	0.960591
ANKRD20A8P	165.862	-0.0317727	0.220348	0.112876	0.515402
ANKRD22	158.568	0.0256401	0.213358	0.614361	0.896994
ANKRD23	562.1	-0.348145	0.491032	0.0261243	0.272564
ANKRD24	283.869	-0.0183571	0.213584	0.71444	0.928334
ANKRD26	6507.46	0.0652942	0.209321	0.430556	0.818556
ANKRD26P1	8.36515	0.0166299	0.218238	0.32594	0.753704
ANKRD27	4384.85	0.14325	0.275384	0.0601244	0.39887
ANKRD28	5263.8	0.140673	0.216979	0.223232	0.661669
ANKRD29	132.327	0.0978948	0.246341	0.0331884	0.299938
ANKRD30B	6998.69	-0.00449387	0.21808	0.73396	0.934415
ANKRD31	240.363	-0.0317157	0.219465	0.162017	0.588216
ANKRD32	1712.25	0.0815496	0.217579	0.340638	0.761759
ANKRD33B	134.959	-0.0733251	0.223597	0.27969	0.714341
ANKRD34A	145.547	-0.10033	0.238634	0.116825	0.521966
ANKRD34B	22.1653	0.0170742	0.218828	0.0942609	0.4813
ANKRD35	83.9898	-0.00434837	0.212964	0.923862	0.985743
ANKRD36	17241.9	-0.104038	0.200694	0.339608	0.761759
ANKRD36B	9397.95	0.0555099	0.165738	0.618522	0.899342
ANKRD36C	21249.6	-0.0946105	0.22706	0.220951	0.65856
ANKRD37	405.838	0.0787934	0.22965	0.182145	0.614397
ANKRD39	400.078	-0.288269	0.305121	0.0515384	0.371078
ANKRD40	4248.39	0.0490621	0.217036	0.350597	0.767261
ANKRD42	990.992	-0.0476128	0.213726	0.451465	0.828077
ANKRD44	2921.66	1.10448	0.551037	0.00143481	0.0656516
ANKRD45	25.9525	-0.00786168	0.210391	0.892979	0.977407
ANKRD46	711.605	0.0103356	0.204817	0.849061	0.968311
ANKRD49	530.665	0.441719	0.367749	0.0183075	0.229992
ANKRD50	8076.34	0.0289225	0.188058	0.757809	0.94142
ANKRD52	4407.2	-0.0588773	0.195372	0.54364	0.867259
ANKRD53	81.9503	0.00268415	0.199007	0.974714	0.994585
ANKRD54	677.502	0.0357653	0.208283	0.574692	0.88129
ANKRD55	23.8915	0.00924181	0.216339	0.750796	0.939668
ANKRD6	1238.01	-0.573934	0.952557	0.0110657	0.182066
ANKRD61	16.6653	0.00289226	0.209084	0.960586	0.991974
ANKRD62	39.6007	0.00255119	0.212749	0.967229	0.99336
ANKRD62P1-PARP4P3	11.1482	-0.0276315	0.219968	0.247327	0.686038
ANKRD63	5.60574	0.0197027	0.218736	0.311599	0.742432
ANKRD65	137.624	0.0644219	0.225594	0.227721	0.666531
ANKRD7	26.0641	0.0259394	0.217085	0.497513	0.848265
ANKRD9	847.708	-0.0802007	0.216359	0.33852	0.761198
ANKS1A	5035.91	0.0894653	0.199294	0.460002	0.83342
ANKS1B	3568.13	-0.0505147	0.223012	0.167025	0.595224
ANKS3	1522.62	-0.0810218	0.222649	0.240183	0.679947
ANKS4B	64.3453	-0.0271509	0.220519	0.186918	0.619736
ANKS6	822.289	0.0071508	0.204205	0.940431	0.989325
ANKZF1	1880.75	0.0287624	0.186502	0.769454	0.944926
ANLN	6679.84	0.0287937	0.212771	0.603812	0.893572
ANO1	8428.95	-0.124546	0.260219	0.0344121	0.304431
ANO10	2347.69	-0.151253	0.236265	0.183178	0.615576
ANO2	423.669	-0.0851193	0.232024	0.142866	0.565716
ANO3	94.6903	0.0256208	0.219135	0.169427	0.599381
ANO4	79.5369	-0.0103955	0.215315	0.768783	0.94459
ANO5	316.738	-0.0275697	0.219348	0.187323	0.620026
ANO6	7210.19	-0.00964592	0.182218	0.924762	0.986051
ANO8	3527.12	-0.134758	0.245815	0.170579	0.600771
ANO9	2645.54	-0.0592707	0.21999	0.304213	0.73723
ANP32A	5884.27	0.0501564	0.160552	0.693377	0.92312
ANP32B	6045.01	0.170237	0.224523	0.16758	0.596441
ANP32C	116.54	-0.105059	0.230136	0.226178	0.664783
ANP32D	15.3801	-0.0604404	0.21874	0.347892	0.765586
ANP32E	3029.19	0.0517197	0.21865	0.362548	0.775654
ANPEP	10434.6	0.00721184	0.216434	0.753283	0.940047
ANTXR1	10191	-0.0203608	0.208402	0.733169	0.934144
ANTXR2	1228.65	0.183351	0.238274	0.146443	0.571279
ANTXRL	153.601	-0.00491264	0.218327	0.363081	0.775759
ANXA1	7840.44	0.0393239	0.215611	0.456861	0.831581
ANXA10	150.793	-0.00673972	0.218112	0.755756	0.940891
ANXA11	7370.63	0.0334026	0.197948	0.709377	0.927565
ANXA13	17.9333	0.00354303	0.217235	0.863784	0.972141
ANXA2	28665.7	0.097537	0.220259	0.291141	0.726226
ANXA2P1	154.663	-0.00625986	0.200645	0.935587	0.988536
ANXA2P2	2231.32	0.0177358	0.196552	0.836359	0.965791
ANXA2R	226.745	0.175975	0.285828	0.075928	0.440997
ANXA3	1561.98	0.0136012	0.21765	0.421613	0.81347
ANXA4	2799.63	-0.00153982	0.19289	0.985562	0.99683
ANXA5	12984.7	-0.08176	0.192767	0.445354	0.826405
ANXA6	8264.34	-0.0611371	0.195546	0.505848	0.851437
ANXA7	4623.46	-0.254508	0.220007	0.0879805	0.468086
ANXA8	31.7065	0.00790761	0.218208	0.229036	0.668469
ANXA8L1	63.3966	0.00556865	0.218263	0.188028	0.6208
ANXA8L2	116.015	0.0118227	0.218452	0.0386571	0.323502
ANXA9	865.98	-0.0500438	0.224203	0.0551177	0.381781
AOAH	1059.62	0.904039	0.905046	0.00460873	0.117978
AOC1	159.401	-0.0232417	0.217603	0.440892	0.823577
AOC2	375.936	0.027454	0.189127	0.773721	0.945885
AOC3	1675.27	-0.0731983	0.219382	0.334019	0.760559
AOC4P	123.16	-0.007172	0.213398	0.864728	0.972282
AOX1	12515	0.0399218	0.22035	0.314891	0.74508
AP1AR	1931.38	0.0463886	0.197422	0.623893	0.901727
AP1B1	9762.32	-0.0166285	0.177888	0.873303	0.97392
AP1G1	6362.21	0.0564345	0.188615	0.586724	0.886507
AP1G2	4719.5	-0.161528	0.269417	0.114322	0.518775
AP1M1	2810.63	-0.048133	0.171305	0.663357	0.913353
AP1M2	3475.45	-0.0822358	0.230282	0.169168	0.599286
AP1S1	1499.93	-0.195307	0.318447	0.0567221	0.38738
AP1S2	1518.67	0.118896	0.242352	0.169478	0.599381
AP1S3	307.939	0.10041	0.233872	0.196582	0.630416
AP2A1	11035.5	-0.0131346	0.18777	0.891229	0.977407
AP2A2	8968.04	-0.125193	0.200161	0.288686	0.72314
AP2B1	10099.7	-0.0995108	0.207321	0.338788	0.761491
AP2M1	11530.8	-0.0367324	0.17608	0.728565	0.932714
AP2S1	3845.54	0.130569	0.259124	0.124929	0.5365
AP3B1	7016.68	0.0792799	0.166479	0.483612	0.843107
AP3B2	635.978	-0.0233152	0.219465	0.0803333	0.450639
AP3D1	14663.1	-0.0721323	0.193883	0.478242	0.840992
AP3M1	3349.24	-0.0520144	0.187093	0.586585	0.886507
AP3M2	1629.46	-0.0223522	0.210951	0.675586	0.917708
AP3S1	3100.68	0.343643	0.323164	0.0358336	0.312496
AP3S2	83.5797	-0.0619678	0.199918	0.50115	0.849682
AP4B1	1258.59	0.794467	0.277835	0.00026628	0.0260507
AP4E1	1917.41	0.15777	0.23994	0.166689	0.594666
AP4M1	1052.04	-0.227501	0.294546	0.0911171	0.475547
AP4S1	259.923	0.0200611	0.198167	0.814579	0.959728
AP5B1	1633.45	0.00789973	0.199156	0.923837	0.985743
AP5M1	2679.61	0.250131	0.324421	0.0637202	0.410416
AP5S1	558.303	0.0918034	0.203864	0.311938	0.742432
AP5Z1	2742.04	0.00786532	0.193861	0.944369	0.990118
APAF1	2934.64	0.0657625	0.198138	0.520847	0.85679
APBA1	641.537	-0.053855	0.21779	0.361459	0.775604
APBA2	1111.73	-0.0763983	0.219136	0.345171	0.764457
APBA3	1286.76	0.0238715	0.182867	0.815247	0.960064
APBB1	1074.55	-0.0479188	0.214066	0.408951	0.804286
APBB1IP	2119.42	0.153273	0.282662	0.0451095	0.348915
APBB2	7705.74	-0.0664886	0.221307	0.287334	0.72169
APBB3	1242.71	-0.0136648	0.193547	0.893375	0.977407
APC	55347.9	0.073976	0.201001	0.441278	0.823742
APC2	102.324	-0.0247983	0.218957	0.185264	0.617076
APCDD1	1368.86	-0.127081	0.264634	0.0531722	0.376492
APCDD1L	206.27	-0.0146255	0.213266	0.757144	0.941335
APCS	3086.03	-0.00988196	0.218829	0.0991547	0.492923
APEH	4749.76	-0.0895716	0.216195	0.300894	0.734318
APEX1	7368.85	-0.0971395	0.22902	0.227476	0.666508
APEX2	1972.97	-0.126002	0.225382	0.240956	0.680271
APH1A	5685.4	-0.00336483	0.198276	0.966872	0.99323
APH1B	625.122	0.0455718	0.199596	0.616602	0.898379
API5	6250.61	-0.112607	0.229855	0.230222	0.669544
APIP	1910.67	0.185469	0.274309	0.107446	0.505618
APITD1	4.26243	-0.0163592	0.217269	0.570988	0.879155
APLF	580.549	0.0442309	0.21385	0.498995	0.848652
APLN	160.328	-0.0492398	0.221905	0.159997	0.587099
APLNR	1029.68	-0.0184155	0.197102	0.905707	0.98206
APLP1	598.169	-0.0211875	0.218283	0.304343	0.737334
APLP2	21033.9	0.079652	0.221604	0.310399	0.741681
APMAP	4630.82	0.00390172	0.202905	0.996733	0.999314
APOA1	13251.5	-0.0708575	0.234997	0.00100234	0.0543519
APOA1BP	3028.54	-0.313771	0.371003	0.0412004	0.333035
APOA2	8827.52	-0.0288707	0.220674	0.00458182	0.117448
APOA4	355.824	-0.0049263	0.21854	0.727464	0.932365
APOA5	1613.09	-0.00737767	0.218577	0.10916	0.508755
APOB	154684	-0.0662783	0.232581	0.000774812	0.0478472
APOBEC2	19.766	0.0121368	0.218458	0.63613	0.905064
APOBEC3A	107.263	0.0615919	0.228065	0.113601	0.516788
APOBEC3B	2529.35	0.133806	0.248784	0.155162	0.579867
APOBEC3C	883.458	0.061958	0.225175	0.151353	0.575863
APOBEC3D	972.4	2.17207	0.693028	4.79514e-05	0.00892713
APOBEC3F	1603.9	0.159541	0.295619	0.0355352	0.310748
APOBEC3G	978.146	0.193484	0.351687	0.00726537	0.149215
APOBEC3H	53.5018	0.0785803	0.234333	0.0858767	0.464027
APOBR	964.649	-0.0265703	0.212001	0.653867	0.909636
APOC1	7913.48	0.0530199	0.223282	0.225238	0.664289
APOC1P1	183.938	0.0309014	0.219208	0.347142	0.765586
APOC3	10868.8	-0.0104172	0.218838	0.169278	0.599343
APOD	15745.5	-0.0266095	0.220389	3.78234e-05	0.0077355
APOE	19203.3	0.153331	0.26026	0.128713	0.542849
APOF	651.664	-0.00626696	0.218567	0.171933	0.602017
APOH	15917.1	-0.00606564	0.218562	0.0147596	0.206418
APOL1	2456.09	0.250044	0.385826	0.038788	0.323574
APOL2	3102.88	0.815189	0.33902	0.000935992	0.0530628
APOL3	1452	1.1697	0.583029	0.00146892	0.0663631
APOL4	566.41	0.0847967	0.23711	0.0892316	0.470595
APOL5	8.16091	-0.030937	0.21931	0.283163	0.718484
APOL6	2010.02	0.125914	0.267721	0.023133	0.257605
APOLD1	350.051	-0.190325	0.290855	0.0742938	0.437765
APOM	301.049	0.01933	0.215549	0.638126	0.905064
APOO	575.601	0.0447477	0.201248	0.664739	0.913763
APOOL	1541.08	0.0676023	0.209669	0.444796	0.826405
APOPT1	1299.19	0.131027	0.21884	0.239696	0.679134
APP	31244.8	-0.390169	0.638989	0.0205234	0.242156
APPBP2	3412.17	0.0769567	0.219845	0.297865	0.732543
APPL1	5297.15	0.0433886	0.184645	0.675837	0.917744
APPL2	2384.3	-0.00246404	0.203577	0.93901	0.988856
APRT	1478.38	-0.00337738	0.200258	0.966719	0.993141
APTR	40.4526	-0.139041	0.237794	0.183231	0.615576
APTX	1381.72	-0.0665306	0.180504	0.552702	0.870597
AQP1	2786.44	-0.843528	0.539717	0.00424235	0.112904
AQP11	213.625	-0.0651323	0.226327	0.176401	0.607063
AQP3	4249.23	0.0128968	0.216346	0.678994	0.918829
AQP4	5.98733	-0.00224918	0.218002	0.829817	0.963737
AQP6	29.0203	0.00740333	0.217005	0.795049	0.953156
AQP7	234.793	-0.0117132	0.214308	0.796727	0.953606
AQP8	4.16697	0.00887424	0.217158	0.671373	0.91702
AQP9	775.417	0.0570082	0.227168	0.0966127	0.486774
AQPEP	64.2927	0.0133888	0.205876	0.843684	0.96743
AQR	5544.32	0.0155575	0.181743	0.879191	0.975036
AR	26676.8	-0.0183646	0.21953	0.0002081	0.0222915
ARAF	29344.5	0.0493261	0.207912	0.52622	0.859319
ARAP1	11609.9	-0.0751537	0.164166	0.499613	0.849057
ARAP2	4112.63	0.0819196	0.21219	0.375039	0.782928
ARAP3	2313.17	-0.0802287	0.208194	0.382923	0.787883
ARC	40.8515	0.100465	0.253013	0.00260514	0.0876584
ARCN1	7251.52	0.179282	0.256328	0.12832	0.542116
AREGB	28.9746	0.0419039	0.221621	0.227597	0.666508
AREL1	3090.48	0.245343	0.238151	0.0781425	0.445792
ARF1	14242.6	-0.252629	0.278431	0.0712245	0.429506
ARF3	3341.21	-0.0110476	0.194203	0.89874	0.979445
ARF4	6283.9	0.0510188	0.195212	0.597215	0.891604
ARF5	3448.4	-0.390526	0.3766	0.028588	0.282684
ARF6	6807.99	0.0646558	0.191979	0.498363	0.848449
ARFGAP1	4956.99	0.00560539	0.196684	0.946518	0.990593
ARFGAP2	3157.86	-0.157801	0.186827	0.230052	0.669444
ARFGAP3	3167.94	0.166945	0.285055	0.0749633	0.439235
ARFGEF1	26953.6	0.0225649	0.206591	0.747093	0.938785
ARFGEF2	13285.4	-0.0447641	0.19471	0.642308	0.905899
ARFIP1	2255.21	0.0567431	0.190337	0.572448	0.879906
ARFIP2	2325.73	-0.0436805	0.218663	0.288496	0.72305
ARFRP1	3087.23	-0.0813648	0.21043	0.38151	0.786345
ARG1	2069.42	-0.03589	0.221711	0.176048	0.60704
ARG2	215.307	-0.0448272	0.20489	0.576416	0.881845
ARGLU1	5125.57	0.0883368	0.218103	0.304496	0.737334
ARHGAP1	5873.64	-0.117279	0.224696	0.225548	0.664692
ARHGAP10	2470.28	-0.0167998	0.196559	0.846058	0.968025
ARHGAP11A	3116.71	0.0423152	0.215808	0.453926	0.829223
ARHGAP11B	1006.01	0.0100161	0.207344	0.900894	0.979812
ARHGAP12	6287.19	0.0989826	0.221062	0.291939	0.727293
ARHGAP15	1223.52	0.0956682	0.241421	0.0689279	0.423179
ARHGAP17	4704.82	0.0520181	0.186738	0.613412	0.896931
ARHGAP18	3920.61	0.0759136	0.229324	0.174986	0.605506
ARHGAP19	26.6681	0.113849	0.231647	0.227545	0.666508
ARHGAP20	215.278	0.0284238	0.207828	0.678378	0.918407
ARHGAP21	18035.9	0.0587068	0.217585	0.391871	0.793075
ARHGAP22	858.234	-0.0474708	0.213279	0.480709	0.842129
ARHGAP23	3708.72	0.11698	0.220272	0.24332	0.682134
ARHGAP24	947.216	-0.0843479	0.211656	0.35164	0.768139
ARHGAP25	1123.7	0.230425	0.407974	0.011306	0.184093
ARHGAP26	3167.51	-0.244124	0.386824	0.0394322	0.325803
ARHGAP27	2624.36	-0.0177702	0.202214	0.821965	0.961546
ARHGAP28	612.206	-0.101016	0.23601	0.193802	0.627677
ARHGAP29	12558	0.974786	0.460313	0.00139389	0.0648518
ARHGAP30	3473.73	0.116756	0.249337	0.103795	0.501696
ARHGAP31	3928.51	0.0667071	0.182191	0.537913	0.864745
ARHGAP32	8086.02	-0.0753374	0.222641	0.286835	0.721257
ARHGAP33	3340.24	0.0909077	0.233705	0.159152	0.585846
ARHGAP35	20535.8	0.0664146	0.22455	0.25925	0.694189
ARHGAP39	3847.79	-0.00168632	0.212073	0.96976	0.993788
ARHGAP4	3913.27	0.945187	0.532695	0.00257394	0.087111
ARHGAP42	1321.03	0.138128	0.249848	0.162388	0.589042
ARHGAP44	872.119	0.0172159	0.212161	0.738923	0.936004
ARHGAP5	17831.5	0.128043	0.248752	0.148685	0.5727
ARHGAP6	427.697	-0.093478	0.227034	0.258805	0.694061
ARHGAP8	23.6329	-0.146045	0.277034	0.0522206	0.372818
ARHGAP9	1144.15	0.1442	0.285845	0.00831647	0.158171
ARHGDIA	13665	0.0488738	0.200266	0.582885	0.88543
ARHGDIB	4153.64	0.0101098	0.208423	0.867792	0.972852
ARHGDIG	90.2847	-0.015228	0.219189	0.00727882	0.149215
ARHGEF1	8649.33	0.124006	0.228633	0.213091	0.650035
ARHGEF10	4662.8	-0.777152	0.458439	0.00447652	0.115684
ARHGEF10L	5745.35	-0.116483	0.231877	0.215977	0.65315
ARHGEF11	8426.58	-0.246334	0.287536	0.0641951	0.411532
ARHGEF12	19672.2	-0.0206698	0.199045	0.803826	0.955859
ARHGEF15	1366.76	-0.163377	0.261598	0.124699	0.535995
ARHGEF16	2248.87	-0.0431446	0.215192	0.429412	0.817968
ARHGEF17	10592.2	-0.196587	0.299346	0.0561433	0.384948
ARHGEF18	4077.03	0.19065	0.246061	0.126681	0.539395
ARHGEF19	1611.4	-0.147676	0.24135	0.176802	0.607329
ARHGEF2	9887.91	0.0221289	0.194272	0.809906	0.958283
ARHGEF25	1485.56	-0.0379791	0.213256	0.466794	0.83664
ARHGEF26	2945.08	-1.40052	1.19195	0.00139455	0.0648518
ARHGEF28	2289.59	0.00568165	0.199732	0.988507	0.998026
ARHGEF3	1724.82	0.331765	0.41133	0.0328113	0.298625
ARHGEF33	78.0316	-0.0638673	0.218312	0.304491	0.737334
ARHGEF34P	1403.73	-0.0629568	0.217932	0.371158	0.780913
ARHGEF35	763.453	-0.0467287	0.216524	0.434797	0.820103
ARHGEF37	1550.36	-0.241044	0.454288	0.00798597	0.155628
ARHGEF39	402.401	-0.067028	0.222103	0.310126	0.741453
ARHGEF4	1004.8	0.0428863	0.220134	0.273404	0.707293
ARHGEF40	5452.72	-1.76085	0.275651	1.97307e-11	1.87639e-07
ARHGEF5	2619.15	-0.0354209	0.211567	0.582815	0.88543
ARHGEF6	3736.33	-0.0832647	0.22574	0.25204	0.688724
ARHGEF7	6450.56	-0.401766	0.266494	0.0180652	0.227913
ARHGEF9	1691.28	-0.0867891	0.214088	0.362114	0.775654
ARID1A	104664	-0.0616111	0.180343	0.569423	0.87838
ARID1B	16390	-0.364622	0.181758	0.00865269	0.161664
ARID2	11188.1	0.0457171	0.186319	0.645276	0.906279
ARID3A	1405.01	0.241684	0.392799	0.0217532	0.250586
ARID3B	689.464	0.443313	0.502388	0.0195155	0.23631
ARID3C	87.5404	-0.034582	0.21949	0.339049	0.761647
ARID4A	3615.34	0.240243	0.287635	0.0738416	0.437256
ARID4B	10222.2	-0.150428	0.188193	0.213522	0.650596
ARID5A	2407.45	-0.0157836	0.206299	0.825352	0.96243
ARID5B	5136.99	0.171433	0.287079	0.0879077	0.468086
ARIH1	5119.53	0.0880497	0.16823	0.433034	0.819532
ARIH2	4026.54	-0.07579	0.19598	0.450497	0.827767
ARIH2OS	40.1066	-0.0396705	0.212092	0.536827	0.864428
ARL1	4626.76	-0.0606202	0.178003	0.569044	0.878081
ARL10	270.754	-0.09565	0.222842	0.273614	0.707293
ARL11	121.352	0.200483	0.340297	0.0323558	0.29773
ARL13B	1027.19	0.0203501	0.174935	0.847762	0.968154
ARL14	8.31477	0.00588483	0.217106	0.822408	0.961546
ARL14EP	1450.8	0.190357	0.224169	0.145427	0.569569
ARL15	639.625	-0.0409638	0.207062	0.586699	0.886507
ARL16	521.77	-0.0137489	0.197335	0.875659	0.97409
ARL17A	952.284	-0.0169733	0.207161	0.74882	0.939297
ARL17B	93.021	0.0144166	0.213912	0.744514	0.937914
ARL2	1070.15	0.011682	0.174927	0.930003	0.987464
ARL2BP	1447.87	0.0169666	0.189651	0.865469	0.972499
ARL3	1132.66	0.099646	0.212979	0.330251	0.757288
ARL4A	621.439	-0.145135	0.268182	0.0965463	0.486569
ARL4C	1570.36	0.0439666	0.198993	0.618374	0.899342
ARL4D	228.151	0.0035144	0.211027	0.973411	0.994335
ARL5A	2527.6	0.288111	0.364926	0.0470996	0.357048
ARL5B	1798.49	0.137912	0.264679	0.0958953	0.485734
ARL5C	4.27592	0.0227754	0.218543	0.385979	0.789845
ARL6	328.518	-0.110623	0.212327	0.296402	0.731011
ARL6IP1	7018.78	0.0984765	0.211934	0.32609	0.753704
ARL6IP4	3643.46	-0.0623668	0.213634	0.407181	0.803594
ARL6IP5	3648.32	-0.131148	0.231493	0.214853	0.65217
ARL6IP6	1656.37	0.0822225	0.176045	0.468196	0.837358
ARL8A	2977.42	-0.297736	0.28376	0.0514377	0.371047
ARL8B	3019.03	-0.0217274	0.193188	0.827497	0.962924
ARL9	96.5771	0.0639925	0.22788	0.126347	0.538938
ARMC1	2988.7	0.0681036	0.213042	0.411821	0.806428
ARMC10	2137.9	-0.0605873	0.217799	0.362785	0.775654
ARMC12	71.9357	-0.0280101	0.207661	0.696519	0.923997
ARMC2	704.851	0.137409	0.258574	0.119337	0.52639
ARMC3	198.131	0.0702157	0.233956	0.0186538	0.232044
ARMC4	79.7166	0.0233239	0.218185	0.321772	0.750656
ARMC5	915.633	-0.050071	0.195083	0.599221	0.892777
ARMC6	1812.1	-0.140878	0.203213	0.225703	0.664728
ARMC7	579.147	-0.0755637	0.226683	0.17423	0.604607
ARMC8	4075.29	0.0111507	0.18642	0.909654	0.983148
ARMC9	2146.99	-0.0238386	0.212505	0.632011	0.903832
ARMCX1	896.485	0.0148234	0.184758	0.870179	0.973433
ARMCX2	2146.72	-0.0104673	0.211372	0.82242	0.961546
ARMCX3	3329.36	-0.0188525	0.190072	0.823111	0.961854
ARMCX4	1204	-0.0175108	0.196885	0.819229	0.960887
ARMCX5	609.092	-0.212601	0.254861	0.104879	0.503358
ARMCX5-GPRASP2	40.9635	-0.0316729	0.201236	0.702766	0.925858
ARMCX6	630.231	-0.112918	0.216336	0.287191	0.721677
ARNT	4307.83	5.36388e-05	0.193346	0.999966	0.999966
ARNT2	991.415	0.00298221	0.214404	0.932847	0.987804
ARNTL	1457.51	0.0705513	0.204787	0.459703	0.833195
ARNTL2	1085.17	0.0676633	0.228278	0.101587	0.497857
ARPC1A	6475.83	-0.0920965	0.227466	0.249269	0.687067
ARPC1B	9858.4	-0.113925	0.243703	0.142209	0.564804
ARPC2	11869.7	0.173814	0.216809	0.167127	0.595383
ARPC3	4360.87	0.434056	0.355681	0.0189503	0.233852
ARPC4	1250.2	-0.0114128	0.174842	0.918943	0.98522
ARPC5	4711.3	-0.0503213	0.199635	0.562035	0.874129
ARPC5L	1232.51	0.189936	0.247172	0.142906	0.565716
ARPP19	2808.25	0.0134459	0.184805	0.892889	0.977407
ARPP21	30.0993	-0.0350555	0.21893	0.356967	0.772435
ARRB1	2443.53	-0.0676467	0.21432	0.378131	0.784663
ARRB2	3108.58	0.135686	0.214029	0.240311	0.679947
ARRDC1	4098.51	-0.030597	0.204053	0.686466	0.920884
ARRDC2	1240.75	-0.191538	0.287914	0.091695	0.476284
ARRDC3	3915.27	0.0862174	0.220904	0.312263	0.742432
ARRDC4	1036.31	0.141049	0.257824	0.104591	0.503358
ARRDC5	108.178	0.155208	0.291737	0.0300979	0.289279
ARSA	3549.37	-0.00437463	0.189929	0.952114	0.99082
ARSB	1397.21	0.0600676	0.199604	0.504498	0.851134
ARSD	3841.89	-0.114662	0.243103	0.119241	0.526087
ARSE	232.965	-0.0558519	0.225826	0.0967033	0.486901
ARSF	24.046	-0.0150018	0.217243	0.616104	0.898161
ARSG	3140.38	-0.008482	0.21727	0.620497	0.900359
ARSH	19.4046	-0.0656569	0.22914	0.107387	0.505618
ARSI	320.668	-0.0250793	0.210172	0.676301	0.917744
ARSJ	371.6	0.0142149	0.211981	0.778267	0.947019
ARSK	345.126	0.0262794	0.200921	0.749048	0.939338
ART1	13.8333	-0.0604305	0.226934	0.15654	0.580331
ART4	172.689	0.0375777	0.221953	0.0267536	0.275812
ART5	14.3768	-0.00734682	0.21724	0.685998	0.920884
ARTN	194.969	0.0151635	0.213391	0.770724	0.945021
ARV1	1323.99	-0.142553	0.234309	0.193705	0.627677
ARVCF	2788.93	-0.329304	0.518758	0.0146448	0.205533
ARX	33.4116	-0.0198498	0.218245	0.426062	0.816164
AS3MT	7.78862	-0.0442691	0.219084	0.328473	0.755885
ASAH1	12938.2	-0.0482616	0.21753	0.405433	0.802345
ASAH2	77.4991	0.0216405	0.214885	0.602216	0.893214
ASAH2B	181.27	-0.290244	0.433726	0.0330001	0.299389
ASAP1	10012.6	0.0207241	0.203925	0.783421	0.9485
ASAP2	5265.85	-0.00828305	0.19456	0.92337	0.985743
ASAP3	2416.99	-0.0467023	0.207212	0.55407	0.871027
ASB1	701.818	-0.0115081	0.189146	0.899114	0.979445
ASB12	6.10517	-0.0321769	0.219704	0.325554	0.753527
ASB13	904.166	-0.0157541	0.207608	0.799363	0.954599
ASB14	17.1618	-0.0664716	0.223427	0.251672	0.688724
ASB15	3.85144	-0.0164119	0.21906	0.298874	0.73359
ASB16	187.15	-0.0290825	0.220771	0.00144434	0.0657208
ASB16-AS1	674.233	-0.0414381	0.187025	0.695996	0.923997
ASB2	135.968	0.0314031	0.218454	0.301775	0.735408
ASB3	121.933	0.0473852	0.198994	0.599407	0.892843
ASB4	14.9929	0.01629	0.218161	0.497316	0.848261
ASB5	15.3694	-0.0150931	0.218552	0.336956	0.760812
ASB6	1541.07	-0.0136866	0.187648	0.882692	0.976149
ASB7	983.536	0.502106	0.250261	0.00411797	0.111234
ASB8	766.87	0.359458	0.304869	0.0321362	0.297147
ASB9	89.39	-0.128778	0.265657	0.0551596	0.381781
ASCC1	1204.33	0.0118275	0.184933	0.905865	0.98206
ASCC2	3644.92	0.0545254	0.188607	0.588952	0.887439
ASCC3	10668.3	0.102209	0.209332	0.330026	0.757123
ASCL2	61.0634	-0.080966	0.236048	0.0761378	0.441474
ASCL4	3.58436	-0.00415243	0.218313	0.8148	0.959728
ASF1A	1162.73	0.0803521	0.229056	0.202132	0.637466
ASF1B	684.344	-0.0109372	0.204552	0.880628	0.975448
ASGR1	1881.33	0.00691506	0.21458	0.864996	0.972336
ASGR2	1365.23	0.0487928	0.222437	0.248065	0.686366
ASH1L	29503.9	-0.121408	0.211822	0.258798	0.694061
ASH1L-AS1	344.931	-0.146403	0.246072	0.131235	0.548027
ASH2L	4788.27	-0.0996345	0.243118	0.0934283	0.480243
ASIC1	484.638	-0.0415824	0.220433	0.206578	0.642011
ASIC2	76.6692	-0.0270282	0.219563	0.239056	0.678686
ASIC3	599.698	0.0497936	0.22063	0.277442	0.711504
ASIC4	33.1903	-0.0193366	0.213177	0.721384	0.930516
ASIP	10.8975	0.0724661	0.230851	0.138527	0.558946
ASL	3793.37	-0.169576	0.292625	0.0678675	0.42088
ASMT	19.6339	0.0465818	0.222386	0.173924	0.604295
ASMTL	2976.96	-0.0211889	0.200453	0.811637	0.958721
ASMTL-AS1	424.128	0.0277075	0.211095	0.664424	0.913697
ASNA1	2550.9	-0.139432	0.219787	0.212732	0.649778
ASNS	2577.86	0.0148151	0.207631	0.747475	0.938785
ASNSD1	2764.42	0.0954778	0.211437	0.343998	0.763342
ASPA	129.717	-0.0148639	0.213924	0.744007	0.937704
ASPDH	169.076	-0.00133067	0.215844	0.953087	0.990933
ASPG	636.883	0.0243677	0.218526	0.340885	0.761864
ASPH	10901.5	-0.0565289	0.221915	0.26045	0.695459
ASPHD1	280.803	0.00306073	0.213574	0.946847	0.990593
ASPHD2	272.547	0.0577141	0.21969	0.357632	0.77259
ASPM	13935	0.00578619	0.211812	0.914996	0.984718
ASPN	6550.59	-0.0626774	0.230099	0.000610389	0.0422167
ASPRV1	56.0671	0.0344419	0.213101	0.552934	0.87061
ASPSCR1	2141.19	-0.0567391	0.207537	0.479088	0.841454
ASRGL1	304.426	-0.119461	0.257674	0.0445442	0.346942
ASS1	7190.68	-0.0124677	0.214879	0.759284	0.941652
ASTE1	607.316	-0.0365426	0.187185	0.694	0.923263
ASTL	15.7441	-0.000528577	0.212191	0.991593	0.998909
ASTN1	78.3833	-0.0147263	0.216906	0.651498	0.909336
ASTN2	1628.84	-0.0186418	0.219084	0.100767	0.49627
ASUN	2935.59	-0.0626043	0.217138	0.366526	0.777472
ASXL1	45708	0.0207353	0.167515	0.846424	0.968025
ASXL2	6709.82	0.194518	0.197038	0.122983	0.532329
ASXL3	130.723	0.0150979	0.212098	0.770424	0.944999
ATAD1	2396.67	-0.0163759	0.199025	0.845972	0.968025
ATAD2	10669.8	-0.00536286	0.208321	0.932056	0.987804
ATAD2B	5616.03	0.00860761	0.183609	0.928076	0.987097
ATAD3A	2985.84	-0.00820718	0.186439	0.933211	0.987849
ATAD3B	3455.53	-0.0297016	0.180138	0.776337	0.946634
ATAD3C	1470.14	0.0777822	0.234398	0.0979323	0.490251
ATAD5	2075.74	0.0193094	0.200529	0.81377	0.959599
ATAT1	1659.27	0.0438718	0.18739	0.656277	0.911158
ATE1	2449.23	0.250135	0.28756	0.0662767	0.41755
ATE1-AS1	40.575	-0.211432	0.350527	0.0237166	0.262261
ATF1	1158.24	0.16398	0.202586	0.186736	0.619736
ATF2	4060.91	0.138619	0.209735	0.254563	0.691337
ATF3	484.378	0.0213983	0.215464	0.582613	0.8853
ATF4	14887	0.200296	0.291422	0.0889688	0.469661
ATF5	4856.35	0.0460059	0.220127	0.32836	0.755885
ATF6	8004.88	-0.0271465	0.181473	0.772186	0.945594
ATF6B	5351.73	0.0495489	0.192711	0.605188	0.893859
ATF7	2028.84	0.0299977	0.166669	0.78324	0.94848
ATF7IP	13979.7	0.122057	0.217944	0.261531	0.695709
ATF7IP2	1864.71	0.249711	0.502321	0.00329803	0.0984749
ATG10	574.621	0.027235	0.191655	0.739843	0.9362
ATG101	1451.88	-0.0371498	0.199888	0.667029	0.914832
ATG12	911.6	0.0539245	0.181295	0.614315	0.896994
ATG13	4005.36	0.128472	0.184156	0.28019	0.715235
ATG14	1011.42	0.0373958	0.158181	0.740011	0.936275
ATG16L1	2326.82	-0.073443	0.218641	0.308425	0.740147
ATG16L2	3225.33	-0.0232594	0.203327	0.7563	0.941048
ATG2A	4359.55	0.0199592	0.192611	0.827111	0.962858
ATG2B	6325.71	0.0574252	0.198235	0.52463	0.85851
ATG3	2839.84	0.0625668	0.194036	0.538389	0.865171
ATG4A	904.777	0.0860211	0.209345	0.379194	0.785469
ATG4B	3162.99	0.0406443	0.192625	0.66277	0.913206
ATG4C	1323.92	0.116129	0.243455	0.161808	0.58821
ATG4D	1418.29	-0.246242	0.276887	0.0714698	0.43004
ATG5	1883.27	0.0897452	0.234869	0.148727	0.572743
ATG7	2212.5	0.158016	0.192141	0.189431	0.621187
ATG9A	2963.2	0.0528795	0.178476	0.623801	0.901727
ATG9B	248.004	-0.0153575	0.216732	0.493395	0.847428
ATIC	4308.71	-0.0279437	0.190226	0.768038	0.944358
ATL1	617.537	-0.0198778	0.208036	0.768957	0.944621
ATL2	5179.77	0.0439324	0.214368	0.485131	0.843422
ATL3	6440.35	-0.00508012	0.192861	0.961285	0.992005
ATM	121688	0.506177	0.43329	0.0144125	0.204981
ATMIN	5640.55	0.0758291	0.213791	0.384244	0.78892
ATN1	27229.4	-0.0916434	0.2168	0.330606	0.757881
ATOH7	10.466	-0.0822772	0.239084	0.0295721	0.286729
ATOH8	172.291	-0.005634	0.212401	0.910158	0.983148
ATOX1	2279.53	-0.0144534	0.198212	0.856637	0.970738
ATP10A	3032.15	-0.181805	0.323551	0.0176516	0.225023
ATP10B	49.4391	0.0311191	0.219406	0.338912	0.761591
ATP10D	3532.2	0.20167	0.257804	0.114328	0.518775
ATP11A	7785.9	-0.0601793	0.211603	0.448922	0.827568
ATP11B	8860.28	0.169331	0.305464	0.0263283	0.273791
ATP11C	5565.5	0.0481337	0.216935	0.415922	0.808796
ATP12A	6.06435	0.000811448	0.21471	0.985342	0.99683
ATP13A1	7813.02	-0.0579372	0.195796	0.560161	0.873801
ATP13A2	5424.43	-0.0172496	0.189255	0.858468	0.971012
ATP13A3	15791.9	0.0158393	0.196949	0.856338	0.970652
ATP13A4	451.283	-0.148696	0.297124	0.000265907	0.0260507
ATP13A5	607.545	-0.0626009	0.231723	0.000120129	0.0158646
ATP1A1	31430.9	0.0412027	0.210787	0.546546	0.868466
ATP1A1-AS1	121.426	-0.0143055	0.205492	0.839675	0.966974
ATP1A2	206.445	-3.32463	0.971101	1.16036e-05	0.0038052
ATP1A3	542.764	-0.0117416	0.218205	0.339387	0.761759
ATP1A4	50.3007	-0.00971293	0.214004	0.835961	0.965732
ATP1B1	11338.5	-0.0907769	0.234446	0.169979	0.600148
ATP1B2	107.272	-0.116186	0.248079	0.127195	0.53989
ATP1B3	3764.97	-0.0373338	0.206904	0.628056	0.902988
ATP1B4	4.00426	-0.00536773	0.218329	0.533011	0.862242
ATP2A1	339.834	0.0108332	0.208126	0.880935	0.975512
ATP2A2	22766.4	0.103534	0.200275	0.348227	0.765794
ATP2A3	7710.69	0.0690648	0.226729	0.205668	0.640647
ATP2B1	7027.91	0.0924074	0.227937	0.25074	0.688724
ATP2B2	904.759	-0.0607477	0.2296	0.0407046	0.330997
ATP2B3	52.0005	0.0261886	0.217872	0.354862	0.771111
ATP2B4	10734.8	0.0112232	0.196034	0.899033	0.979445
ATP2C1	12121.5	-0.13774	0.197179	0.2533	0.690125
ATP2C2	1345.86	0.00538156	0.212608	0.915344	0.984723
ATP4A	3.66571	0.0327249	0.221509	0.0925414	0.478558
ATP5A1	17431.6	-0.0488774	0.196782	0.604679	0.893859
ATP5B	18422.1	-0.0676774	0.195791	0.494435	0.847435
ATP5C1	9715.2	0.267225	0.33459	0.0571719	0.388859
ATP5D	1519.77	-0.0958531	0.217293	0.299416	0.733746
ATP5E	200.265	-0.0986531	0.213812	0.317727	0.747434
ATP5EP2	295.059	-0.0858527	0.195311	0.416756	0.809343
ATP5F1	3820.87	0.0971678	0.21913	0.301968	0.735488
ATP5G1	1079.16	-0.00425445	0.180278	0.966974	0.993241
ATP5G2	2680.67	-0.0267395	0.191772	0.775611	0.946395
ATP5G3	3157.09	0.0327813	0.193702	0.721174	0.930516
ATP5H	3355.71	0.0959007	0.217112	0.299062	0.733699
ATP5I	2712.45	-0.057506	0.182584	0.581478	0.884778
ATP5J	2673.37	-0.0240327	0.196098	0.788887	0.950635
ATP5J2	368.545	-0.147072	0.251915	0.153617	0.578416
ATP5L	6261.52	0.0779944	0.220568	0.323648	0.752818
ATP5L2	179.878	0.0223703	0.171502	0.81017	0.958351
ATP5O	4023.72	0.0779243	0.193633	0.462704	0.835052
ATP5S	601.866	0.0294405	0.182253	0.774927	0.946102
ATP5SL	731.761	0.00861452	0.193124	0.935676	0.988536
ATP6AP1	12107	-0.0307664	0.196315	0.72045	0.930338
ATP6AP1L	277.759	-0.05857	0.215521	0.370047	0.780155
ATP6AP2	7526.78	0.156223	0.243378	0.165249	0.593026
ATP6V0A1	5079.07	0.0648771	0.170738	0.548548	0.868466
ATP6V0A2	2634.21	0.120243	0.2131	0.272369	0.706257
ATP6V0A4	373.355	0.0750522	0.237516	2.19298e-05	0.00563656
ATP6V0B	4189.23	-0.0467599	0.199352	0.610198	0.895808
ATP6V0C	16640	0.0981346	0.184475	0.375202	0.782928
ATP6V0D1	2364.81	0.0532107	0.170915	0.63069	0.903377
ATP6V0D2	81.9405	0.012431	0.216134	0.63659	0.905064
ATP6V0E1	3967.88	0.255969	0.214907	0.0661018	0.4168
ATP6V0E2	1792.1	-0.10382	0.246464	0.0445959	0.347201
ATP6V1A	4513.67	0.0186827	0.172392	0.85943	0.971375
ATP6V1B1	1056.19	-0.12773	0.273822	0.00535154	0.127402
ATP6V1B2	4643.65	0.107155	0.183686	0.3773	0.784461
ATP6V1C1	5756.94	0.0580953	0.216814	0.398646	0.797376
ATP6V1C2	594.211	0.0241736	0.217624	0.490135	0.845898
ATP6V1D	1617.15	0.00982913	0.18795	0.910313	0.983148
ATP6V1E1	2691.36	0.116627	0.212824	0.28152	0.716228
ATP6V1E2	120.444	-0.0335675	0.211485	0.600464	0.893017
ATP6V1F	2944.59	-0.0877472	0.18902	0.403572	0.800856
ATP6V1G1	2750.4	-0.0160164	0.206495	0.816427	0.960141
ATP6V1G2	39.7345	0.00511271	0.21499	0.873454	0.97392
ATP6V1H	3010.45	0.0200943	0.208544	0.751382	0.939799
ATP7A	3249.59	0.116113	0.207924	0.28744	0.72169
ATP7B	1783.59	-0.10288	0.249214	0.0103141	0.175783
ATP8A1	2401.79	0.257659	0.45362	0.0171216	0.221082
ATP8A2	214.97	-0.0397253	0.222164	0.0652829	0.414308
ATP8B1	6290.53	-0.178854	0.305677	0.0315504	0.294699
ATP8B2	5232.06	0.33869	0.459349	0.0243732	0.266731
ATP8B3	350.813	-0.221579	0.319381	0.0686519	0.422415
ATP8B4	1607.14	0.194604	0.352731	0.00944822	0.16882
ATP9A	9073.3	-0.0586979	0.215249	0.399067	0.797714
ATP9B	3867.07	0.0614188	0.193028	0.540564	0.86586
ATPAF1	1583.4	-0.00201234	0.199288	0.989988	0.998403
ATPAF2	550.247	-0.00439458	0.18507	0.963685	0.99219
ATPIF1	2044.61	0.0371629	0.196168	0.679575	0.919103
ATR	67809.5	-0.0450286	0.188952	0.652896	0.909336
ATRAID	2547.29	0.0828323	0.177166	0.440107	0.82331
ATRIP	921.659	-0.0476193	0.212433	0.472766	0.839312
ATRN	7887.39	0.150046	0.259457	0.132349	0.548472
ATRNL1	1548.29	-0.0498638	0.222832	0.215116	0.652258
ATRX	123681	0.138638	0.21339	0.231795	0.671263
ATXN1	6353.83	-0.0519925	0.201988	0.541936	0.866056
ATXN10	4797.91	-0.106381	0.214096	0.299617	0.733907
ATXN1L	3665.55	0.0112232	0.19174	0.898975	0.979445
ATXN2	9346.05	0.0543011	0.191939	0.584652	0.886344
ATXN2L	35682.8	0.0779218	0.214592	0.343599	0.763272
ATXN3	1868.26	0.0634172	0.17783	0.537942	0.864745
ATXN7	4507.24	-0.121793	0.19536	0.300471	0.734003
ATXN7L1	1345.52	-0.0861351	0.193234	0.42775	0.816514
ATXN7L2	575.242	0.165673	0.229965	0.170156	0.600375
ATXN7L3	2783.72	0.126881	0.183283	0.267907	0.701775
ATXN7L3B	1300.45	-0.0344208	0.182958	0.73699	0.93497
AUH	1312.26	-0.0103689	0.19101	0.907662	0.98268
AUNIP	237.766	0.0370605	0.20894	0.617065	0.89868
AUP1	4163.63	0.0590201	0.160464	0.594671	0.890705
AURKA	7066.01	0.0224783	0.20398	0.771295	0.945192
AURKAIP1	2414.24	-0.0649587	0.210278	0.445847	0.826405
AURKB	689.506	0.0433013	0.213226	0.511317	0.853515
AURKC	74.4385	-0.0255486	0.207738	0.706773	0.92691
AUTS2	14102.2	-0.150062	0.2661	0.108673	0.507616
AVEN	602.491	-0.0683731	0.208984	0.444047	0.825969
AVIL	1265.7	0.000482572	0.204492	0.994298	0.999108
AVL9	3265.97	0.0748481	0.189339	0.482825	0.842739
AVPI1	168.38	0.0477453	0.214985	0.447921	0.827373
AVPR1A	503.418	-0.0153623	0.215354	0.680637	0.919375
AVPR2	20.7369	-0.0162006	0.209509	0.786616	0.949974
AXDND1	64.363	0.0271165	0.203629	0.73073	0.933365
AXIN1	5678.62	-0.110089	0.223778	0.229535	0.669029
AXIN2	1145.13	0.0254972	0.214569	0.530401	0.861431
AXL	30435.7	-0.179799	0.3026	0.0421216	0.335632
AZGP1	20582	-0.123163	0.274072	0.000136683	0.0171034
AZGP1P1	163.219	-0.0402786	0.22319	1.75077e-06	0.000924989
AZI2	3001.16	0.133766	0.208193	0.246219	0.684762
AZIN1	15189.7	0.0490543	0.212903	0.485579	0.843689
AZIN2	994.749	-0.150908	0.27167	0.0701402	0.426732
AZU1	50.5628	-0.0161801	0.218767	0.143682	0.566508
B2M	31826.3	0.148099	0.271713	0.0858666	0.464027
B3GALNT1	1487.03	0.0373146	0.204607	0.624204	0.901727
B3GALNT2	4514.64	-0.0939344	0.224496	0.27649	0.710722
B3GALT1	12.4498	-0.111255	0.261358	0.00202606	0.0759801
B3GALT2	19.1193	0.0797921	0.231453	0.165089	0.592997
B3GALT4	613.362	0.0492642	0.20978	0.501114	0.849682
B3GALT5	192.219	-0.0657996	0.229875	0.104807	0.503358
B3GALT6	296.331	-0.0995726	0.228455	0.240889	0.680271
B3GALTL	733.371	-0.0467742	0.191308	0.63714	0.905064
B3GAT1	290.714	-0.0483766	0.225424	0.0400356	0.327841
B3GAT2	9.14679	0.00839897	0.215668	0.819225	0.960887
B3GAT3	1750.27	-0.123	0.201407	0.282031	0.71679
B3GNT1	946.926	-0.0911475	0.217858	0.30536	0.737479
B3GNT2	2614.81	0.270304	0.338806	0.0595642	0.396952
B3GNT3	1193.6	0.00910144	0.218237	0.0243085	0.26633
B3GNT4	72.4413	0.063092	0.223274	0.284711	0.719723
B3GNT5	1289.5	0.0240303	0.217783	0.383414	0.788394
B3GNT7	526.82	0.127287	0.270305	0.0181484	0.228295
B3GNT8	267.052	-0.012609	0.212225	0.768272	0.944364
B3GNT9	927.388	0.0471921	0.206698	0.580453	0.884632
B3GNTL1	339.163	0.0144496	0.198963	0.770631	0.944999
B4GALNT1	416.723	-0.010754	0.21534	0.724009	0.931456
B4GALNT2	72.7296	-0.0266587	0.219183	0.349866	0.766819
B4GALNT4	5049.72	-0.0274946	0.220223	0.0449253	0.348309
B4GALT1	11298.2	-0.0777541	0.231811	0.112342	0.515286
B4GALT2	4080.98	-0.0293755	0.202137	0.757655	0.94142
B4GALT3	4292.91	-0.134697	0.24762	0.140659	0.562812
B4GALT4	1586.32	-0.0138588	0.181484	0.892447	0.977407
B4GALT5	3151.71	0.0407462	0.206205	0.566922	0.877011
B4GALT6	347.174	0.0899893	0.232376	0.198379	0.633293
B4GALT7	1618.25	-0.0388434	0.161258	0.714505	0.928334
B9D1	347.037	-0.0168112	0.194046	0.862718	0.971573
B9D2	165.434	0.019657	0.19592	0.816746	0.960141
BAALC	175.415	0.0643958	0.229661	0.0304074	0.291281
BAALC-AS1	4.14302	-0.0274648	0.217106	0.475717	0.839644
BAAT	2058.61	-0.0381418	0.220307	0.27718	0.711224
BABAM1	2737.96	-0.0666741	0.184059	0.540712	0.86586
BACE1	1127.66	-0.0602601	0.214841	0.379427	0.785469
BACE1-AS	69.0428	0.0456268	0.194976	0.616555	0.898379
BACE2	3744.79	0.0865495	0.237181	0.100047	0.49581
BACH1	3419.53	0.177466	0.271659	0.112248	0.515286
BACH2	501.602	0.043866	0.212619	0.521066	0.85679
BAD	1135.57	-0.0449532	0.201498	0.602371	0.893268
BAG1	4274.36	0.0223142	0.207399	0.747287	0.938785
BAG2	507.523	0.0295997	0.209145	0.647884	0.908087
BAG3	4825.8	-0.0721813	0.216989	0.321978	0.75099
BAG4	3015.92	-0.044345	0.216386	0.41908	0.810958
BAG5	2015.86	0.171044	0.168268	0.156146	0.580234
BAG6	14126.8	0.121625	0.199889	0.279278	0.713845
BAHCC1	3960.56	-0.0799575	0.229258	0.142167	0.564804
BAHD1	2814.27	-0.0154097	0.18855	0.873417	0.97392
BAI1	672.982	-0.04421	0.220627	0.231091	0.670153
BAI2	3405.04	-0.00659198	0.217428	0.677103	0.917861
BAI3	139.355	-0.0983286	0.234285	0.188338	0.6208
BAIAP2	4429.53	-0.0672362	0.223474	0.203752	0.639137
BAIAP2-AS1	355.427	-0.236284	0.304784	0.0667375	0.418158
BAIAP2L1	3054.79	-0.0747664	0.226976	0.233306	0.672957
BAIAP2L2	294.283	1.78491	0.996819	0.00053123	0.0391628
BAIAP3	1769.12	-0.0281823	0.219875	0.10103	0.496368
BAK1	1045.02	0.137939	0.240704	0.174378	0.604739
BAMBI	3652.38	0.0126012	0.216834	0.647492	0.907873
BANF1	2209.96	0.0399962	0.193037	0.679079	0.918829
BANK1	731.946	0.0650693	0.230946	0.00465858	0.11868
BANP	2018.75	-0.00857941	0.173656	0.943046	0.989758
BAP1	17751.5	-0.0936981	0.213204	0.305657	0.737486
BARD1	2075.3	0.107385	0.22413	0.267239	0.700992
BARX1	271.633	0.0163656	0.218346	0.295112	0.730072
BARX2	1124.84	0.0495453	0.226124	0.0145843	0.205324
BASP1	461.615	0.176537	0.315233	0.0192732	0.235496
BATF	137.933	-0.00837105	0.204398	0.901289	0.979888
BATF2	236.599	0.144433	0.293479	0.00274333	0.0899624
BATF3	99.2275	0.0577733	0.22249	0.25713	0.693564
BAX	2453.35	-0.00429397	0.182372	0.925364	0.986405
BAZ1A	8268.05	0.0130711	0.186899	0.930062	0.987464
BAZ1B	13353.8	-0.0768332	0.199186	0.455851	0.831125
BAZ2A	16170.2	0.0347922	0.193513	0.703994	0.926094
BAZ2B	12736.1	0.259639	0.25461	0.0671369	0.41922
BBC3	268.705	-0.293371	0.435944	0.0277913	0.278813
BBIP1	717.565	0.123987	0.238016	0.184874	0.616831
BBOX1	539.748	-0.00257201	0.218375	0.359748	0.77366
BBS1	2486.99	-0.0890197	0.225184	0.234804	0.674928
BBS10	1279.72	0.0892384	0.185806	0.440627	0.823572
BBS12	416.752	0.386706	0.349107	0.0240046	0.264218
BBS2	2744.03	-0.0881667	0.211462	0.365489	0.777447
BBS4	946.253	-0.0624003	0.213534	0.397354	0.796497
BBS5	602.683	-0.0694419	0.206661	0.423336	0.814769
BBS7	1157.65	0.0531391	0.184858	0.645413	0.906279
BBS9	2204.8	-0.0440445	0.192151	0.632173	0.903832
BBX	4331.84	0.116338	0.209145	0.29416	0.729203
BCAM	19841.1	-0.0163721	0.2146	0.560949	0.873898
BCAN	60.4351	-0.0328185	0.221153	0.022276	0.253111
BCAP29	2655.48	-0.130579	0.249138	0.154415	0.579055
BCAP31	6069.7	0.371261	0.365042	0.0283606	0.281681
BCAR1	5303.52	-0.399426	0.331859	0.0197848	0.23858
BCAR3	1470.07	0.0516392	0.218582	0.323067	0.751833
BCAR4	65.9626	0.0243649	0.220085	0.0121469	0.19031
BCAS1	1174.45	-0.00911647	0.218515	0.251968	0.688724
BCAS2	1333.58	0.875254	0.473508	0.00250237	0.0855666
BCAS3	3971.77	0.137363	0.248011	0.129787	0.545165
BCAS4	706.317	0.0266308	0.218049	0.363039	0.775759
BCAT1	1203.01	0.0533588	0.200099	0.570471	0.878785
BCAT2	1582.6	-0.0510235	0.211306	0.473532	0.839312
BCCIP	2803.3	0.0919344	0.199593	0.369234	0.779363
BCDIN3D	305.998	-0.099892	0.210491	0.300547	0.734095
BCDIN3D-AS1	19.2722	-0.0366769	0.216004	0.463281	0.835539
BCHE	620.24	-0.0359186	0.221261	0.0845981	0.460651
BCKDHA	3576.52	0.0288493	0.202433	0.710033	0.927798
BCKDHB	1495.47	-0.120389	0.246535	0.147579	0.572621
BCKDK	3816.53	0.00920275	0.200154	0.902761	0.980455
BCL10	1206.82	0.186355	0.275287	0.109707	0.509802
BCL11B	416.418	0.177587	0.334452	0.00317984	0.0969241
BCL2	3752.24	0.0325001	0.213947	0.554113	0.871027
BCL2A1	261.063	0.192492	0.362354	0.00133316	0.0630766
BCL2L1	3279.67	0.028107	0.194971	0.75699	0.941335
BCL2L10	20.7727	-0.00982882	0.216923	0.7246	0.931461
BCL2L11	1492.42	0.0293089	0.197881	0.760337	0.941879
BCL2L12	837.338	0.000399723	0.204795	0.994416	0.999108
BCL2L13	2412.01	-0.0353944	0.200304	0.679122	0.918829
BCL2L14	49.6101	0.017302	0.217586	0.406719	0.803301
BCL2L15	20.4424	0.0620462	0.218555	0.344832	0.764062
BCL2L2	691.276	-0.146973	0.248427	0.136665	0.555657
BCL3	4366.28	0.026182	0.204618	0.755025	0.940891
BCL6	19275.3	-0.028389	0.200128	0.73506	0.934611
BCL6B	1009.08	-0.130923	0.235922	0.198053	0.632998
BCL7A	734.502	-0.0079502	0.201221	0.912214	0.983466
BCL7B	1341.32	-0.135711	0.241343	0.184105	0.61646
BCL7C	1739.42	-0.0220092	0.19775	0.78782	0.950472
BCL9	6965.93	-0.131978	0.250781	0.126866	0.539698
BCL9L	16540.2	-0.0163384	0.199608	0.839689	0.966974
BCLAF1	10765.5	0.116498	0.225533	0.249137	0.687024
BCMO1	24.1269	0.0261405	0.219474	0.197716	0.632629
BCO2	700.1	-0.0132341	0.210231	0.820424	0.961193
BCOR	32586.8	-0.0313708	0.207234	0.634256	0.904585
BCORL1	18760.9	0.0134817	0.19252	0.87424	0.97409
BCR	44329.7	0.12421	0.208358	0.262078	0.696483
BCRP3	256.127	-0.101372	0.239288	0.160218	0.587385
BCS1L	1493.34	-0.0512962	0.182867	0.617998	0.899342
BDH1	1804.23	-0.0839083	0.23255	0.159559	0.58655
BDH2	959.784	-0.0664445	0.203506	0.46988	0.83766
BDKRB1	67.1279	-0.0607545	0.228446	0.02961	0.286738
BDKRB2	444.248	-0.102912	0.251317	0.0026096	0.0876584
BDNF	58.0328	-0.0575751	0.226649	0.0802237	0.450639
BDNF-AS	43.9656	-0.0397751	0.21399	0.48012	0.841959
BDP1	16106.7	-0.150435	0.246489	0.143608	0.566452
BEAN1	65.9258	-0.0201872	0.21228	0.689438	0.921729
BECN1	4254.89	0.153006	0.214088	0.186278	0.619081
BEGAIN	104.032	-0.0556649	0.222881	0.261427	0.695627
BEND2	8.34577	0.0168031	0.218368	0.405997	0.803012
BEND3	754.419	0.0576045	0.212731	0.451908	0.828254
BEND4	16.485	0.0150256	0.218657	0.0664393	0.417882
BEND5	134.871	0.149737	0.280435	0.0514172	0.371047
BEND6	142.06	0.13917	0.247751	0.143234	0.565965
BEND7	919.131	0.0473841	0.223184	0.151064	0.575617
BEST1	339.64	0.0501667	0.214862	0.399717	0.798427
BEST3	30.7779	-0.0306703	0.217976	0.450904	0.827767
BEST4	32.7536	-0.0142991	0.212126	0.749955	0.939554
BET1	858.427	0.0178408	0.204485	0.819875	0.961002
BET1L	649.352	-0.00340047	0.179994	0.968665	0.993788
BEX1	208.265	-0.00137359	0.216243	0.980899	0.99683
BEX2	541.976	-0.0184779	0.217357	0.432985	0.819532
BEX4	591.186	-0.0519117	0.22078	0.213826	0.650924
BEX5	52.1273	0.00308907	0.215446	0.918858	0.985213
BFAR	2627.75	0.243493	0.250613	0.0985191	0.491407
BFSP1	174.548	-0.0615224	0.211098	0.440678	0.823572
BFSP2	17.8475	0.0492507	0.224774	0.103122	0.500294
BGLAP	12.9002	-0.0431735	0.216283	0.435661	0.820233
BGN	41998.1	-0.0286631	0.208941	0.623409	0.901713
BHLHA15	639.248	0.0346305	0.219238	0.319226	0.748296
BHLHB9	385.239	-0.52085	0.490072	0.0166059	0.218125
BHLHE22	33.6598	0.147972	0.270854	0.0831801	0.457647
BHLHE40	10128.1	-0.016685	0.209156	0.76467	0.943498
BHLHE40-AS1	144.567	-0.0495278	0.211613	0.468484	0.837358
BHLHE41	1522.79	0.0423685	0.21268	0.510627	0.853138
BHMT	1099.68	-0.0321126	0.221279	0.000953565	0.0533435
BHMT2	889.065	-0.0603938	0.226515	0.15045	0.574726
BICC1	2837.17	0.0401014	0.210196	0.556147	0.872098
BICD1	2328.69	-0.014339	0.208253	0.824404	0.962092
BICD2	3788.98	0.092698	0.20876	0.358588	0.77303
BID	783.613	0.0334161	0.208279	0.638465	0.905064
BIK	262.723	-0.0339095	0.215736	0.490443	0.8461
BIN1	1319.48	0.0177143	0.203459	0.822209	0.961546
BIN2	1359.51	1.11084	1.00868	0.00279309	0.0905018
BIN3	599.193	-0.0558076	0.20388	0.52993	0.861205
BIRC2	4313.51	0.153755	0.266911	0.111036	0.512899
BIRC3	2347.28	0.0511965	0.223919	0.083098	0.457328
BIRC5	803.357	0.0305424	0.209626	0.653864	0.909636
BIRC6	48561.4	0.221298	0.195108	0.0856105	0.463906
BIRC7	32.6943	0.085646	0.238531	0.0751795	0.439839
BIVM	112.468	0.0242999	0.206536	0.723029	0.930825
BLCAP	1628.45	-0.0401524	0.174282	0.707131	0.926935
BLID	64.6361	-0.0047734	0.212811	0.921473	0.985667
BLK	207.941	0.079804	0.239825	0.000179826	0.0201193
BLM	1976.42	0.108751	0.24479	0.130906	0.547456
BLMH	1667.67	0.0259408	0.184825	0.793392	0.952612
BLNK	1632.83	0.022963	0.211434	0.670995	0.916834
BLOC1S1	180.359	0.144958	0.230651	0.197949	0.632876
BLOC1S2	979.168	0.0447413	0.185144	0.636177	0.905064
BLOC1S3	317.662	0.076706	0.204909	0.450526	0.827767
BLOC1S4	369.519	-0.0913035	0.191095	0.379561	0.785469
BLOC1S5	22.4838	0.0465229	0.214651	0.474559	0.839312
BLOC1S6	981.066	0.156221	0.227017	0.186969	0.619754
BLVRA	903.321	0.00405665	0.20632	0.951659	0.99082
BLVRB	2483.37	-0.0147303	0.203297	0.847787	0.968154
BLZF1	2450.16	-0.127967	0.204012	0.272139	0.705959
BMF	524.326	0.0261401	0.19353	0.78007	0.947499
BMI1	59.1532	0.0173331	0.204296	0.801856	0.955103
BMP1	9291.94	0.0151923	0.207216	0.823333	0.961854
BMP10	16.7934	-0.00821678	0.217705	0.781724	0.947788
BMP2	166.881	0.067977	0.225987	0.215983	0.65315
BMP2K	7150.76	0.183487	0.281293	0.0947913	0.482712
BMP3	4.46587	-0.0174951	0.217651	0.600125	0.893017
BMP4	1397.63	-0.0443123	0.223565	0.013848	0.201061
BMP5	153.012	0.0132434	0.216534	0.658396	0.912193
BMP6	727.958	3.396	1.36821	4.73938e-05	0.00892505
BMP8A	882.636	-0.0937922	0.238582	0.0816865	0.454292
BMP8B	616.75	-0.0641261	0.21628	0.389329	0.791758
BMPER	115.274	0.0432147	0.220886	0.290588	0.725801
BMPR1A	3280.69	-0.180301	0.238617	0.153429	0.578416
BMPR1B	9119.11	-0.0110638	0.21885	0.0147929	0.206728
BMPR2	11819.4	0.0706361	0.168759	0.52325	0.857949
BMS1	9194.5	0.0994017	0.217543	0.326059	0.753704
BMS1P20	2320.95	0.101165	0.224172	0.273197	0.707293
BMX	73.7046	0.0706708	0.228073	0.189256	0.621187
BNC1	147.965	0.0510056	0.226754	0.000762439	0.0477026
BNC2	1490.63	-0.0245534	0.209516	0.699115	0.924604
BNIP1	272.207	-0.0492282	0.194136	0.603303	0.893337
BNIP2	3690.23	0.198762	0.270954	0.107443	0.505618
BNIP3	2306.3	-0.0721658	0.225245	0.233872	0.67367
BNIP3L	2526.25	0.226099	0.330631	0.0466519	0.355497
BNIPL	657.302	-0.027405	0.219452	0.150037	0.574183
BOD1	1620.92	-0.084259	0.1799	0.438964	0.822869
BOD1L1	12943.6	0.0185339	0.164296	0.860639	0.971466
BOK	766.044	-0.0234773	0.212001	0.658548	0.912193
BOLA1	581.746	-0.0643832	0.210375	0.424028	0.815226
BOLA2	952.45	-0.00189612	0.211175	0.967254	0.99336
BOLA3	447.53	0.0939857	0.219044	0.314627	0.745062
BOP1	1930.09	-0.031797	0.206858	0.663308	0.913353
BORA	1239.57	0.0885958	0.224321	0.296221	0.730846
BPGM	683.203	0.129429	0.238897	0.191727	0.625282
BPHL	1021.91	-0.0706424	0.204137	0.450443	0.827767
BPI	74.3399	0.0121261	0.218134	0.279604	0.714313
BPIFB1	95.5328	0.00288551	0.217776	0.80748	0.957259
BPIFB2	58.4516	-0.0111598	0.218872	0.0160713	0.215568
BPIFB4	3.90723	0.045251	0.224727	0.0436263	0.34161
BPNT1	2100.28	-0.128295	0.208121	0.252539	0.689138
BPTF	31510.2	0.110993	0.238342	0.153814	0.578416
BRAF	26317.2	0.00737086	0.177955	0.873766	0.973951
BRAP	1595	0.18982	0.24842	0.136153	0.554971
BRAT1	2505.56	-0.100556	0.219859	0.274252	0.708443
BRCA1	27739.6	0.0857353	0.213243	0.355113	0.771385
BRCA2	23933	0.110754	0.239885	0.175924	0.60678
BRCC3	1714.36	-0.00317007	0.175249	0.955681	0.991764
BRD1	7064.69	-0.028168	0.189116	0.763497	0.943096
BRD2	22099.3	0.152241	0.170686	0.206265	0.641249
BRD3	4772.38	0.0320219	0.188245	0.733203	0.934144
BRD4	15987.6	-0.132981	0.208605	0.257639	0.693564
BRD7	3965.86	0.0150206	0.19606	0.889108	0.976989
BRD8	4117.34	0.050205	0.201673	0.559427	0.873157
BRD9	3258.23	-0.109414	0.192698	0.326445	0.754013
BRDT	14.4057	-0.0155602	0.219021	0.371681	0.780974
BRE	2190.39	0.0812583	0.155753	0.466384	0.836393
BRE-AS1	9.44522	0.0361418	0.217508	0.447136	0.826749
BRF1	2801.93	-0.0564938	0.211219	0.423487	0.814769
BRF2	1248.65	-0.110656	0.250337	0.0695426	0.425277
BRI3	4439.94	-0.00567315	0.205475	0.921856	0.985667
BRI3BP	1409.79	0.078527	0.218663	0.327216	0.754289
BRICD5	230.795	0.00426628	0.211801	0.922571	0.985723
BRINP1	29.5374	-0.110139	0.257883	0.00687921	0.146356
BRINP2	50.1603	-0.014207	0.218919	0.00391695	0.107972
BRIP1	14346.7	0.0407521	0.21469	0.489873	0.845898
BRIX1	2774.76	0.0406279	0.207735	0.589907	0.888033
BRK1	3418.91	0.0402246	0.192266	0.705002	0.926465
BRMS1	1538.74	0.0115807	0.199635	0.877432	0.974438
BRMS1L	584.34	0.0709729	0.208011	0.440584	0.823572
BROX	4784.5	-0.0813996	0.171354	0.475223	0.839486
BRPF1	2683.43	0.0185755	0.172763	0.836683	0.965931
BRPF3	6670.68	-0.0927363	0.216852	0.306274	0.737851
BRSK1	1422.71	-0.0608934	0.223148	0.204533	0.639699
BRSK2	632.139	-0.00519694	0.218088	0.580711	0.884778
BRWD1	23473.7	0.0719873	0.188246	0.495001	0.847583
BRWD1-IT2	49.509	-0.00297038	0.216017	0.915931	0.984723
BRWD3	7439.97	0.0319706	0.195433	0.726565	0.932352
BSCL2	89.8435	0.056066	0.198074	0.586814	0.886507
BSDC1	3140.61	-0.039367	0.179903	0.705155	0.926465
BSG	11198.6	-0.392348	0.383293	0.0265069	0.274598
BSN	1515.74	-0.0223094	0.219727	0.0288143	0.283386
BSPRY	1455.39	-0.0831823	0.229855	0.17685	0.607382
BST1	281.397	0.479734	0.490426	0.0172443	0.221725
BST2	6655.1	0.0360541	0.218496	0.358113	0.773019
BTAF1	13384.4	0.204361	0.223983	0.121733	0.530925
BTBD1	3609.54	0.0336119	0.172007	0.772769	0.945759
BTBD10	2342.78	0.0292373	0.18459	0.794307	0.952845
BTBD11	256.21	-0.193075	0.320644	0.0305755	0.291648
BTBD16	92.6492	0.0031214	0.216847	0.890022	0.977112
BTBD17	14.6149	0.0221306	0.219756	0.0797388	0.450366
BTBD19	1804.44	-0.120011	0.248298	0.118574	0.525333
BTBD2	4964.04	-0.350685	0.308741	0.032579	0.29791
BTBD3	2040.3	0.0124159	0.209174	0.836305	0.965787
BTBD6	2841.66	-0.109039	0.232605	0.184401	0.616563
BTBD7	4324.69	0.140932	0.19174	0.239204	0.678686
BTBD8	261.185	-0.0452875	0.186091	0.653004	0.909366
BTBD9	2138.49	0.012861	0.197446	0.878507	0.974638
BTC	175.943	-0.069175	0.225166	0.217287	0.654337
BTD	859.692	0.15546	0.246854	0.151242	0.575672
BTF3	7120.06	-0.00965534	0.198761	0.904889	0.981749
BTF3L4	1262.04	0.0941378	0.208764	0.362721	0.775654
BTG1	2545.71	0.606909	0.343658	0.00501047	0.12276
BTG2	3477.13	0.0553595	0.220546	0.314712	0.745062
BTG3	1059.7	0.0110742	0.211487	0.832026	0.964477
BTK	6681.12	0.195924	0.345777	0.0134461	0.199089
BTLA	123.368	0.0482983	0.224443	0.0157832	0.213359
BTN1A1	3.65493	0.0796162	0.239218	0.00752049	0.150777
BTN2A1	3133.51	0.242123	0.281095	0.0725389	0.43332
BTN2A2	1290.8	0.201677	0.339671	0.0364597	0.315534
BTN2A3P	252.898	0.0521388	0.209032	0.557054	0.872552
BTN3A1	3878.37	0.675093	0.554032	0.00814387	0.156619
BTN3A2	2294.08	0.218898	0.366487	0.0278381	0.278821
BTN3A3	2587.75	0.350761	0.533145	0.0246215	0.267499
BTNL10	39.0375	-0.0233211	0.22036	0.000140747	0.0173831
BTNL8	13.2351	0.0259858	0.217375	0.493463	0.847428
BTNL9	455.093	-0.037106	0.217787	0.395856	0.795606
BTRC	2087.06	-0.0444311	0.193229	0.638363	0.905064
BUB1	3613.76	0.015639	0.20885	0.809527	0.958252
BUB1B	2227.06	0.0179247	0.209937	0.773588	0.945885
BUB3	5320.29	0.0575635	0.189246	0.54009	0.865828
BUD13	1390.6	0.0805474	0.204445	0.416564	0.809272
BUD31	1717.84	-0.0647569	0.198954	0.512899	0.854044
BVES	236.494	0.0866377	0.232522	0.189205	0.621187
BVES-AS1	7.71971	0.0160818	0.218042	0.518254	0.85518
BYSL	1327.95	0.0290747	0.213562	0.564745	0.87621
BZRAP1	2707.36	0.0137781	0.208655	0.804417	0.956133
BZRAP1-AS1	194.658	1.72437	0.416014	1.57367e-06	0.000855177
BZW1	8552.41	0.176281	0.228446	0.151784	0.576154
BZW2	3204.08	-0.0363887	0.183574	0.680076	0.919272
C10orf10	1444.12	0.0408319	0.215172	0.494171	0.847435
C10orf105	4.39433	0.0658255	0.230678	0.0627961	0.406866
C10orf107	35.6487	0.0958314	0.245517	0.0256977	0.271447
C10orf11	394.163	-0.111625	0.236735	0.19936	0.63468
C10orf111	31.483	0.0699664	0.22632	0.234469	0.674472
C10orf113	398.781	-0.0138411	0.217178	0.501435	0.849711
C10orf115	7.53252	0.00292526	0.218377	0.802328	0.955103
C10orf12	1677.09	0.0726328	0.198944	0.463137	0.835372
C10orf128	188.416	0.109676	0.243175	0.143896	0.566882
C10orf131	90.6788	-0.011839	0.205383	0.870523	0.973488
C10orf2	876.685	-0.105926	0.218526	0.286079	0.720881
C10orf25	33.2166	0.0495816	0.220934	0.281684	0.716356
C10orf32	50.5878	0.0504567	0.212465	0.482938	0.842835
C10orf35	230.736	-0.0614156	0.22176	0.298787	0.733564
C10orf54	817.2	0.0982793	0.24091	0.104197	0.502619
C10orf55	21.3195	-0.124259	0.26171	0.0485784	0.361826
C10orf62	10.7347	-0.0107472	0.218442	0.275539	0.710033
C10orf76	2055.77	0.13172	0.193638	0.284802	0.719858
C10orf82	193.357	-0.0347043	0.22193	0.00149281	0.0667976
C10orf85	12.3723	-0.0190153	0.21853	0.26698	0.700573
C10orf88	822.376	0.092402	0.212147	0.32435	0.753261
C10orf90	110.482	-0.00643304	0.216972	0.810016	0.958351
C10orf91	29.9396	0.0195122	0.214277	0.684697	0.920569
C10orf95	19.2036	0.00296499	0.214204	0.937328	0.988714
C11orf1	677.96	0.0115245	0.201372	0.895202	0.978531
C11orf16	21.7998	0.0384834	0.222124	0.0999788	0.495724
C11orf21	161.063	0.290113	0.694873	0.00179176	0.0730391
C11orf24	3956.99	0.073127	0.183079	0.498242	0.848449
C11orf30	4918.83	0.0618789	0.182215	0.564428	0.875897
C11orf31	2045.47	-0.0364542	0.204457	0.678265	0.918388
C11orf45	48.112	0.0129194	0.212074	0.802606	0.955283
C11orf48	1127.78	0.0107704	0.186213	0.913167	0.983989
C11orf49	1187.37	-0.111353	0.228292	0.20733	0.642984
C11orf54	1745.41	-0.0132847	0.209525	0.824315	0.962083
C11orf57	880.443	0.0634686	0.205532	0.494794	0.847454
C11orf58	4396.43	0.128598	0.193066	0.276142	0.710446
C11orf63	747.06	0.0101794	0.210991	0.84456	0.967575
C11orf65	130.85	-0.0784443	0.216952	0.344326	0.763474
C11orf68	1388.07	-0.000375759	0.196887	0.996391	0.999314
C11orf70	103.898	0.03613	0.207427	0.625348	0.902095
C11orf71	216.703	0.0154314	0.209542	0.799568	0.954636
C11orf73	830.596	0.0489316	0.201057	0.586865	0.886507
C11orf74	560.832	-0.0179214	0.187413	0.862945	0.971713
C11orf80	2609.11	0.0639911	0.207009	0.532789	0.862194
C11orf83	986.915	-0.0170214	0.195467	0.846367	0.968025
C11orf84	1718.04	-0.0380694	0.193207	0.686573	0.920884
C11orf85	39.8019	0.0356561	0.220783	0.204366	0.639631
C11orf86	6.03759	0.0167941	0.218942	0.239289	0.678686
C11orf88	5.60009	-0.00148147	0.21841	0.622203	0.90118
C11orf91	27.994	0.0103051	0.213641	0.81807	0.960564
C11orf94	49.3597	-0.00986296	0.200916	0.894247	0.977954
C11orf95	1025.48	0.0212829	0.206817	0.758412	0.941652
C11orf96	829.352	0.0689325	0.194524	0.505766	0.851437
C12orf10	1381.94	-0.0313555	0.202849	0.680468	0.919368
C12orf29	1361.73	-0.0501196	0.200424	0.576163	0.881792
C12orf4	1961.5	0.0861267	0.205067	0.428157	0.816723
C12orf42	20.8744	0.0679014	0.231801	0.0563665	0.385922
C12orf43	403.395	-0.000459809	0.193221	0.970126	0.993788
C12orf45	478.732	-0.0519233	0.199976	0.56842	0.877665
C12orf49	1297.11	0.0729965	0.214888	0.372223	0.78125
C12orf5	402.114	0.38743	0.302694	0.0234058	0.260093
C12orf54	4.61221	-0.0300487	0.219022	0.34534	0.764563
C12orf55	588.11	2.85907	0.7417	4.0704e-06	0.00168302
C12orf56	16.8397	-0.0382992	0.221719	0.127347	0.540365
C12orf57	3221.66	-0.144798	0.252414	0.11742	0.522968
C12orf60	56.1067	-0.0440579	0.212813	0.522078	0.857335
C12orf61	35.7906	-0.0366866	0.211905	0.575575	0.881653
C12orf65	277.502	0.182214	0.307713	0.0560951	0.384895
C12orf66	582.51	0.0116286	0.198199	0.861032	0.971466
C12orf73	278.634	-0.0460775	0.212325	0.461612	0.834362
C12orf74	45.0329	-0.029515	0.219725	0.276816	0.711027
C12orf75	590.632	0.0485528	0.212796	0.457433	0.831736
C12orf76	199.283	-0.00775431	0.201883	0.92443	0.985961
C12orf77	3.80857	0.0131425	0.218567	0.426467	0.8162
C12orf79	13.6978	0.134609	0.268899	0.0568328	0.387785
C14orf1	491.524	0.0489638	0.202836	0.577169	0.882407
C14orf105	152.532	-0.015015	0.217571	0.578342	0.883397
C14orf119	1066.7	0.139613	0.171794	0.256714	0.693344
C14orf132	143.039	-0.0425277	0.223279	0.00980052	0.171307
C14orf142	281.857	-0.013972	0.198244	0.864837	0.972336
C14orf159	2938.77	0.102826	0.240249	0.126066	0.538289
C14orf166	5069.33	0.113141	0.209594	0.300054	0.733962
C14orf169	1588.38	-0.0388482	0.177442	0.717149	0.929199
C14orf178	8.79599	-0.0520965	0.220016	0.320755	0.749664
C14orf180	9.57361	0.0131344	0.218587	0.451795	0.828248
C14orf182	52.4048	0.0181734	0.214897	0.660565	0.912797
C14orf183	141.975	-0.0493692	0.191452	0.611633	0.896526
C14orf2	2171.43	0.205663	0.260516	0.0961793	0.485855
C14orf28	323.645	0.340636	0.341308	0.033733	0.301524
C14orf37	301.224	-0.0898936	0.235201	0.100364	0.496044
C14orf39	103.438	0.028689	0.218903	0.386982	0.790589
C14orf64	22.8917	0.0581637	0.224395	0.197184	0.631494
C14orf79	808.462	-0.0836738	0.235376	0.05546	0.382512
C14orf80	750.187	-0.0136828	0.207049	0.808969	0.957955
C14orf93	532.152	-0.039792	0.185658	0.689504	0.921729
C15orf26	34.2123	-0.193338	0.34289	0.0226775	0.25477
C15orf27	29.8963	-0.0354533	0.209124	0.621509	0.900999
C15orf37	56.7826	-0.00310793	0.21039	0.952886	0.990933
C15orf38	252.695	-0.075851	0.216297	0.337311	0.760812
C15orf39	5997.58	0.172868	0.265248	0.12225	0.531447
C15orf40	391.051	-0.0686453	0.207793	0.412515	0.806708
C15orf41	324.062	-0.111821	0.235119	0.208555	0.6451
C15orf48	235.422	0.0867746	0.236254	0.131345	0.548027
C15orf52	2215.88	-0.0964992	0.242891	0.0607443	0.400748
C15orf53	8.01476	0.148534	0.293275	0.0103499	0.176078
C15orf56	5.88143	-0.034663	0.220088	0.301866	0.735429
C15orf57	387.171	0.0642574	0.19415	0.530681	0.861493
C15orf59	173.769	-0.0187369	0.217827	0.37306	0.781649
C15orf61	544.99	0.0227032	0.189769	0.839403	0.966974
C15orf62	29.0308	0.0490386	0.220074	0.349154	0.766068
C15orf65	153.92	0.0761381	0.212653	0.382995	0.787946
C16orf13	1374.56	-0.110728	0.216415	0.248462	0.686754
C16orf45	1165.39	-0.0907879	0.244493	0.000144467	0.0175017
C16orf46	321.526	-0.00834791	0.188053	0.932718	0.987804
C16orf47	10.1446	-0.0300131	0.218021	0.340713	0.761759
C16orf54	88.9555	0.108589	0.255828	0.00890033	0.16356
C16orf58	4891.85	-0.164469	0.255739	0.117098	0.522329
C16orf59	556.72	-0.0545849	0.210728	0.427812	0.816514
C16orf62	4590.82	0.0706951	0.194048	0.486922	0.844804
C16orf70	1466.19	0.0610241	0.203951	0.494542	0.847435
C16orf71	151.445	-0.0286403	0.220424	0.0322665	0.29773
C16orf72	3856.5	-0.0285967	0.179624	0.774481	0.946102
C16orf74	120.749	-0.0874398	0.228147	0.246199	0.684762
C16orf80	901.958	0.0147456	0.19529	0.876337	0.97409
C16orf86	128.489	0.0072684	0.203375	0.922275	0.985667
C16orf87	529.193	0.0522463	0.215247	0.43656	0.820939
C16orf89	68.2739	0.0563108	0.228486	0.0121428	0.19031
C16orf91	613.538	-0.0344673	0.208058	0.61316	0.896931
C16orf93	437.978	-0.00211638	0.213906	0.945821	0.990433
C16orf95	121.73	-0.0310074	0.203216	0.7009	0.925177
C16orf96	31.4961	0.0305162	0.211616	0.625805	0.902274
C17orf100	72.4088	0.0452978	0.2066	0.559325	0.873157
C17orf104	64.6744	0.0379831	0.223303	0.0016597	0.0703725
C17orf107	449.709	-0.0316054	0.210723	0.570093	0.878629
C17orf47	10.2004	-0.00173748	0.217721	0.845116	0.967834
C17orf50	6.05386	-0.0421855	0.223098	0.151277	0.575688
C17orf51	98.5334	0.135251	0.253897	0.109489	0.509207
C17orf53	550.905	0.0161887	0.199999	0.839187	0.966944
C17orf58	411.653	-0.0186415	0.214482	0.612138	0.896526
C17orf59	496.126	0.0116785	0.198542	0.875993	0.97409
C17orf62	4012.96	0.200564	0.272498	0.0993555	0.493374
C17orf67	429.233	0.0182901	0.2051	0.797749	0.954048
C17orf70	3010.41	-0.0631501	0.200622	0.483421	0.843107
C17orf74	6.09811	0.0174273	0.218026	0.504432	0.851134
C17orf75	774.804	-0.0498699	0.205298	0.530983	0.861493
C17orf77	17.2421	-0.00223112	0.218143	0.90097	0.979812
C17orf80	1723.32	0.104501	0.212263	0.305227	0.737479
C17orf82	57.4345	-0.0582219	0.224826	0.172201	0.602692
C17orf85	2447.99	0.0151053	0.145255	0.879989	0.975372
C17orf89	237.448	-0.0807657	0.211326	0.347291	0.765586
C17orf96	179.247	-0.021613	0.213876	0.672092	0.917167
C17orf97	1932.72	-0.0148544	0.214242	0.691093	0.922454
C17orf98	3.67746	-0.00360601	0.217998	0.724814	0.931609
C18orf21	905.538	0.0584316	0.196176	0.572551	0.879922
C18orf25	936.513	0.0334369	0.184252	0.762607	0.943096
C18orf32	12.1554	0.05164	0.219752	0.324193	0.753256
C18orf8	2164.14	0.00449685	0.206121	0.945604	0.990433
C19orf10	3305.96	0.105598	0.224637	0.255931	0.692803
C19orf12	944.857	0.226314	0.353759	0.0459915	0.352441
C19orf18	103.48	0.00966969	0.205553	0.885497	0.976753
C19orf24	1257.47	-0.00472896	0.194104	0.948795	0.99064
C19orf25	668.114	-0.0622394	0.190981	0.538797	0.865242
C19orf26	293.336	-0.0572233	0.226696	0.0298022	0.287382
C19orf33	600.949	0.0483993	0.225199	0.0756029	0.440941
C19orf35	38.1916	0.0261352	0.214227	0.603042	0.893337
C19orf38	133.323	0.111442	0.249948	0.0893062	0.470788
C19orf40	211.077	0.155772	0.275189	0.0875828	0.467403
C19orf43	5841.85	-0.0355298	0.187656	0.705952	0.926781
C19orf44	851.426	-0.583693	0.268593	0.00248197	0.0854287
C19orf45	63.7534	-0.148971	0.295693	0.00100302	0.0543519
C19orf47	1476.03	0.0773183	0.214428	0.377886	0.784636
C19orf48	1906.39	-0.0496561	0.210865	0.51394	0.854044
C19orf52	372.432	-0.0429006	0.192574	0.651451	0.909336
C19orf53	1677.65	-0.0361508	0.188081	0.723682	0.931254
C19orf54	626.853	0.120177	0.242395	0.163467	0.590756
C19orf57	304.839	0.00578194	0.204046	0.937722	0.988716
C19orf60	865.312	-0.41384	0.349753	0.0244675	0.266811
C19orf66	3670.89	0.104282	0.224672	0.248813	0.686754
C19orf67	11.106	-0.00506547	0.213911	0.902773	0.980455
C19orf68	662.555	-0.0960255	0.186338	0.402276	0.799769
C19orf70	899.551	-0.0361317	0.180224	0.745877	0.938452
C19orf71	691.982	-0.0301062	0.213068	0.569161	0.878186
C19orf73	61.4855	-0.0277569	0.212092	0.640708	0.90526
C19orf80	73.2741	-0.0137397	0.217214	0.594516	0.890579
C19orf81	17.3945	0.0237518	0.218884	0.371492	0.780974
C19orf82	101.908	-0.142472	0.260875	0.107826	0.506636
C19orf83	73.5292	0.0537278	0.22128	0.292931	0.728306
C19orf84	7.68097	0.028263	0.217563	0.46399	0.835997
C1D	620.207	0.10066	0.20638	0.337609	0.760812
C1GALT1	2609.62	0.115567	0.251211	0.100982	0.496368
C1GALT1C1	1504.9	0.0363662	0.205848	0.638136	0.905064
C1orf101	372.399	-0.0567333	0.202236	0.513214	0.854044
C1orf105	11.5233	-5.17733	1.26207	5.62447e-07	0.00042791
C1orf106	1181.01	-0.0039697	0.216287	0.855126	0.97003
C1orf109	381.478	-0.0224691	0.19248	0.812132	0.959065
C1orf112	3348.89	-0.0242092	0.197169	0.784799	0.949254
C1orf115	492.633	-0.104442	0.252671	0.00821453	0.157342
C1orf116	1363.45	-0.0354991	0.219219	0.362761	0.775654
C1orf122	464.991	-0.0342926	0.209329	0.601778	0.893089
C1orf123	611.419	0.0450667	0.189697	0.662576	0.913206
C1orf127	94.2072	-0.0654851	0.224436	0.242665	0.681756
C1orf131	878.159	-0.153294	0.227712	0.19612	0.630384
C1orf145	103.976	-0.00327281	0.209903	0.953498	0.990933
C1orf159	760.48	0.0266076	0.189471	0.840136	0.966974
C1orf162	585.407	0.0704398	0.225199	0.228195	0.666914
C1orf167	41.2915	0.0638579	0.226314	0.20392	0.639499
C1orf168	355.108	-0.0608261	0.229684	3.98138e-05	0.00797543
C1orf174	704.799	0.0651042	0.179216	0.545696	0.868466
C1orf177	31.197	0.017548	0.214788	0.673623	0.917234
C1orf186	156.695	0.0939289	0.24826	0.00281495	0.0910269
C1orf189	46.2	-0.0703686	0.219076	0.315492	0.745189
C1orf192	23.3906	0.0173165	0.218191	0.337122	0.760812
C1orf194	27.2401	-0.00260143	0.217897	0.773289	0.945811
C1orf198	6014.85	-0.940743	0.702679	0.00478754	0.120101
C1orf204	84.2901	0.0402879	0.211744	0.552531	0.870597
C1orf21	1849.54	-0.0435784	0.216303	0.458499	0.832123
C1orf210	239.39	-0.0592565	0.222299	0.205433	0.640547
C1orf213	65.2353	0.00164911	0.203122	0.981463	0.99683
C1orf216	395.594	-0.0144618	0.199841	0.856779	0.970738
C1orf220	114.855	-0.0744676	0.221965	0.28889	0.723419
C1orf226	398.939	-0.0646584	0.226223	0.198035	0.632998
C1orf228	360.033	0.0378467	0.211123	0.559204	0.873157
C1orf229	14.3228	-0.0461156	0.222123	0.168664	0.598617
C1orf233	189.059	-0.068381	0.225639	0.246562	0.684912
C1orf234	5.97021	-0.0634841	0.226944	0.181973	0.614397
C1orf27	2563.52	-0.353645	0.249578	0.0261831	0.272878
C1orf35	1148.96	-0.588042	0.557727	0.00974431	0.171291
C1orf43	7019.9	-0.069936	0.208377	0.420239	0.811961
C1orf50	347.569	0.0572441	0.204555	0.525774	0.859125
C1orf52	959.086	0.171722	0.210226	0.159244	0.58595
C1orf53	129.466	-0.0829919	0.230012	0.208762	0.645383
C1orf54	414.756	0.124559	0.215306	0.263357	0.698189
C1orf56	762.17	-0.064201	0.227325	0.0578471	0.391131
C1orf61	16.3496	-0.018778	0.217003	0.594962	0.890757
C1orf64	219.358	-0.00486394	0.218554	0.158969	0.585415
C1orf74	293.889	-0.0516637	0.191744	0.606435	0.894204
C1orf85	2421.48	0.0236536	0.207902	0.72361	0.931254
C1orf86	1777.46	-0.0955502	0.20416	0.347577	0.765586
C1orf94	46.9522	0.00220494	0.216541	0.962061	0.99219
C1QA	4328.56	0.113246	0.252528	0.0595069	0.396952
C1QB	6388.91	0.0718814	0.227578	0.175265	0.605877
C1QBP	2579.03	-0.0324212	0.205004	0.680078	0.919272
C1QC	9253.46	0.089675	0.232795	0.169173	0.599286
C1QL1	155.516	-0.00581813	0.216546	0.853294	0.969189
C1QL2	121.76	-0.00634292	0.218409	0.0733073	0.435927
C1QL3	8.58527	0.0349765	0.218905	0.379345	0.785469
C1QTNF1	843.535	-0.022044	0.188885	0.787566	0.950472
C1QTNF2	257.308	-0.100134	0.25112	8.31767e-05	0.0125557
C1QTNF3	171.491	-0.0349019	0.220832	0.0796708	0.450366
C1QTNF4	22.5848	0.000240865	0.210145	0.994726	0.999108
C1QTNF6	1138.67	-0.0012959	0.211787	0.976271	0.995372
C1QTNF7	93.1874	-0.0589585	0.227809	0.0142327	0.203385
C1QTNF8	12.3106	-0.00275996	0.218511	0.0257327	0.271457
C1QTNF9	25.1115	-0.0135892	0.215237	0.69204	0.922629
C1QTNF9B	9.08257	0.0204111	0.210974	0.727193	0.932352
C1QTNF9B-AS1	74.9088	0.0394643	0.208009	0.591026	0.888641
C1R	17101.5	0.0403519	0.214168	0.507766	0.852376
C1RL	3859.64	-0.0889301	0.22591	0.270817	0.704264
C1RL-AS1	165.793	-0.0318491	0.199145	0.715931	0.929179
C1S	25072.7	0.0490145	0.217946	0.385994	0.789845
C2	5620.29	0.063118	0.227386	0.146905	0.57163
C20orf144	5.8893	0.0505202	0.220045	0.345602	0.764672
C20orf166	7.24548	-0.0222298	0.218268	0.451524	0.828077
C20orf166-AS1	13.6512	0.0493587	0.225506	0.0641224	0.411382
C20orf194	2847.02	0.19639	0.267366	0.0837373	0.45859
C20orf195	45.6471	-0.0146825	0.214897	0.692588	0.922858
C20orf196	82.7458	0.575162	0.400709	0.00794158	0.154922
C20orf197	31.7459	-0.0352694	0.21661	0.482313	0.842488
C20orf202	6.34188	0.0319179	0.219239	0.357257	0.772435
C20orf203	12.7922	-0.0253283	0.216732	0.460641	0.833863
C20orf24	67.0609	0.0140211	0.195797	0.872699	0.97392
C20orf26	127.189	-0.0309049	0.219645	0.2187	0.656447
C20orf27	1335.11	0.0737126	0.213919	0.380277	0.785779
C20orf96	1184.55	0.0667932	0.215381	0.369577	0.779828
C21orf119	54.2438	0.0301043	0.210996	0.639233	0.905064
C21orf128	10.8903	-0.00545755	0.2164	0.853925	0.969586
C21orf2	727.409	-0.0600761	0.203186	0.485739	0.843722
C21orf33	6388.58	-0.158742	0.23922	0.192242	0.626411
C21orf49	62.4928	0.00987545	0.205265	0.895238	0.978531
C21orf58	661.543	-0.0712461	0.213856	0.392485	0.793734
C21orf59	2558.36	-0.0158555	0.191392	0.865812	0.972499
C21orf67	96.9964	-0.199893	0.326894	0.0414154	0.333606
C21orf88	30.9727	-0.0430636	0.223296	0.13955	0.560633
C21orf90	28.8156	-0.0587934	0.227539	0.052496	0.373486
C21orf91	843.414	0.0112599	0.214047	0.757717	0.94142
C22orf15	18.3375	0.075829	0.236471	0.00550175	0.129189
C22orf23	28.4718	-0.00295782	0.215326	0.910936	0.983148
C22orf24	9.3432	0.0219255	0.209385	0.728028	0.932594
C22orf34	410.272	-0.00274488	0.212267	0.952016	0.99082
C22orf39	305.984	-0.00388127	0.188599	0.962608	0.99219
C22orf46	293.088	-0.0301938	0.196836	0.733361	0.934203
C2CD2	1640.51	-0.0626448	0.210691	0.433962	0.819843
C2CD2L	1763.12	-0.141922	0.209875	0.219892	0.658221
C2CD3	5448.87	-0.204397	0.219857	0.118317	0.524781
C2CD4A	19.5342	0.0412666	0.220531	0.278123	0.71248
C2CD4B	47.0987	-0.0598028	0.222998	0.250257	0.688043
C2CD4C	52.2587	-0.0225562	0.219368	0.0914495	0.476259
C2CD4D	154.743	0.0163802	0.214479	0.720813	0.930516
C2CD5	5119.67	-0.132571	0.215087	0.242818	0.681902
C2orf15	165.03	0.0509598	0.216286	0.42779	0.816514
C2orf16	15.0453	0.0106105	0.216376	0.708651	0.927082
C2orf27A	929.052	-0.0229887	0.213895	0.613733	0.896994
C2orf27B	8.32166	-0.0182311	0.218115	0.35377	0.770461
C2orf40	28.2554	-0.0851223	0.236547	0.116509	0.521796
C2orf42	696.366	0.0479321	0.188352	0.637044	0.905064
C2orf43	653.513	0.134772	0.228185	0.223195	0.661669
C2orf44	380.947	0.215279	0.276713	0.102172	0.498461
C2orf47	849.556	0.063888	0.191384	0.532711	0.862194
C2orf48	143.804	-0.00635497	0.21552	0.845625	0.968025
C2orf49	1038.76	0.104929	0.204833	0.343788	0.763272
C2orf50	43.8002	-0.019227	0.217933	0.359402	0.773611
C2orf54	541.181	0.0845695	0.243039	0.000545671	0.0398142
C2orf61	48.6014	-0.00383307	0.207819	0.949619	0.990642
C2orf66	6.42197	-0.00571994	0.214605	0.892636	0.977407
C2orf68	1050.11	-0.0457922	0.189641	0.619532	0.899828
C2orf69	1210.02	0.106949	0.216562	0.300939	0.734318
C2orf70	61.4131	-0.0463752	0.219752	0.335048	0.760559
C2orf71	5.46532	0.00339386	0.21853	0.612324	0.896535
C2orf72	478.042	-0.0828829	0.241692	8.70438e-05	0.013036
C2orf73	10.8073	-0.0258119	0.21906	0.142797	0.565716
C2orf74	329.426	0.129315	0.271945	0.0201995	0.240573
C2orf76	343.974	-0.00580448	0.194931	0.942732	0.989696
C2orf81	299.117	-0.0386086	0.215539	0.451942	0.828254
C2orf82	102.672	0.108614	0.252651	0.0447268	0.347652
C2orf88	58.8206	0.0319286	0.220483	0.0695252	0.425277
C3	136963	0.021837	0.214309	0.652219	0.909336
C3AR1	873.64	0.0661615	0.218988	0.335893	0.760559
C3orf14	815.596	-0.0884653	0.237043	0.126264	0.538823
C3orf17	2681.87	0.0145243	0.185015	0.884715	0.97641
C3orf18	324.551	-0.0176482	0.207498	0.759664	0.941652
C3orf20	50.7036	0.102149	0.251713	0.0114521	0.185063
C3orf22	13.5292	-0.0239848	0.218563	0.358701	0.77303
C3orf33	253.694	-0.118687	0.240667	0.159445	0.586374
C3orf35	195.12	0.016946	0.201659	0.819847	0.961002
C3orf36	19.2903	-0.0940865	0.233216	0.198269	0.633051
C3orf38	1785.45	0.143318	0.233873	0.203661	0.639137
C3orf52	775.725	0.0206656	0.216442	0.563961	0.875586
C3orf55	90.3548	0.0413333	0.222102	0.0860954	0.464812
C3orf58	1184.57	-0.0150114	0.21291	0.780829	0.947499
C3orf62	342.934	0.0232362	0.196063	0.793304	0.952577
C3orf67	443.596	-0.126832	0.255974	0.0951289	0.484172
C3orf70	169.132	0.00101232	0.209954	0.983894	0.99683
C3orf80	68.1262	-0.0262003	0.218164	0.290092	0.725135
C3P1	359.542	-0.00161852	0.218409	0.886744	0.976989
C4A	8510.43	0.0384081	0.220476	0.182074	0.614397
C4B	9087.22	0.0556657	0.226701	0.0580213	0.392137
C4BPA	8317.86	-0.0399743	0.222798	0.118695	0.525333
C4BPB	686.272	-0.0189632	0.216976	0.566267	0.876998
C4orf19	369.667	0.000804538	0.217011	0.957228	0.991847
C4orf22	4.48374	-0.00551872	0.217209	0.779846	0.947499
C4orf26	10.1867	0.0697636	0.232255	0.0663913	0.417819
C4orf27	971.191	0.0065223	0.191763	0.928342	0.987097
C4orf29	1636.77	0.0566054	0.188632	0.629697	0.903346
C4orf3	1783.89	0.0300019	0.202819	0.70227	0.925718
C4orf32	354.14	0.0215711	0.210428	0.724561	0.931461
C4orf33	340.068	0.0332726	0.170545	0.770201	0.944997
C4orf36	71.6124	-0.0369627	0.204998	0.63873	0.905064
C4orf46	313.57	0.0754275	0.21995	0.337899	0.760812
C4orf47	122.261	0.087866	0.213335	0.364817	0.776849
C4orf48	94.2192	-0.0889852	0.221607	0.289472	0.724358
C4orf50	139.204	-0.0158439	0.214206	0.730529	0.933365
C4orf51	24.0936	0.0549648	0.228654	0.00126707	0.0614787
C5	9851.14	-0.00235689	0.214788	0.944746	0.990345
C5AR1	1501.27	0.0413458	0.205586	0.611327	0.896526
C5AR2	342.407	-0.0227106	0.217785	0.362108	0.775654
C5orf15	2810.87	0.0483204	0.187742	0.630418	0.903377
C5orf20	32.1525	0.112887	0.261586	0.00239464	0.0832653
C5orf22	2078.57	-0.0657889	0.202379	0.47254	0.839312
C5orf24	1582.33	-0.0212784	0.187375	0.827136	0.962858
C5orf27	14.5258	-0.0189535	0.217558	0.490489	0.8461
C5orf28	724.13	0.0592223	0.207232	0.495092	0.847583
C5orf30	902.584	0.0465455	0.21352	0.504837	0.851172
C5orf34	414.248	0.0330519	0.210956	0.6089	0.895566
C5orf38	190.802	-0.00839186	0.21819	0.445314	0.826405
C5orf42	15132.9	-0.0298873	0.194506	0.747393	0.938785
C5orf45	1247.74	0.0299867	0.205332	0.69914	0.924604
C5orf46	215.419	-0.039929	0.21477	0.497829	0.848265
C5orf49	53.2899	-0.00967779	0.217443	0.575429	0.881653
C5orf51	1007.62	0.00275773	0.179013	0.950526	0.99082
C5orf55	151.987	-0.067448	0.211572	0.401019	0.799032
C5orf56	251.464	0.1861	0.277614	0.104129	0.502545
C5orf58	5.94653	-0.00294844	0.21845	0.866403	0.972499
C5orf60	33.9593	-0.0661969	0.231692	0.00187566	0.074518
C5orf63	240.3	0.0432791	0.217373	0.320392	0.749656
C5orf64	3.95628	-0.0108481	0.218181	0.388745	0.791551
C5orf66	82.0733	-0.0299216	0.213811	0.569959	0.878566
C6	6319.95	-0.0242858	0.218008	0.468719	0.837358
C6orf1	720.541	-0.00561885	0.202871	0.938045	0.988716
C6orf106	3874.27	0.115662	0.212687	0.287462	0.72169
C6orf118	4.6215	-0.0370358	0.222291	0.0886058	0.469149
C6orf120	1630.65	-0.0702683	0.198537	0.4764	0.840088
C6orf123	15.756	-0.0223175	0.215701	0.605802	0.894038
C6orf132	8312.72	0.0100656	0.215918	0.734881	0.934611
C6orf136	1055.06	0.399156	0.21748	0.00873716	0.162176
C6orf141	353.895	0.062309	0.228982	0.084102	0.459529
[truncated: 17,022 more rows]

## Sheet: top genes
Supplementary Table 10. Top 10 significantly up- and down-regulated genes in responders compared to non-responders at baseline, C1D1, and week 8. Genes with immune-related functions highlighted in blue
	Up-regulated		Down-regulated
	Baseline
	Gene	Description	Gene	Description
1	FCER2	encodes a low-affinity receptor for IgE, playing essential roles in B cell growth, differentiation, and regulation of IgE production	C1orf105	is involved in the innate immune response, particularly in lymphoid tissues and bone marrow.
2	SHISA3		ANGPTL5	encodes a protein that interacts with immune inhibitory receptors, playing a role in hematopoietic stem cell maintenance and immune regulation5
3	HMSD	is known as a minor histocompatibility antigen, and can generate immune responses after recognition by specific T-cells	FAM189A1
4	TEPP		FLJ22184
5	KIF19		HOXC13-AS	is associated with immune responses in cancer, particularly in regulating tumor immunity through the infiltration of immune cells6,7.
6	IGF2BP3	gene is involved in immune regulation and has been associated with immune cell infiltration in various cancers1,2	MPV17L	is involved in the innate immune response and mitochondrial function, contributing to cell protection and immune regulation
7	KLRC2	also known as NKG2C, is expressed in natural killer (NK) cells and is involved in the regulation of NK cell function3.	TMEM59L	has been linked to immune responses in cancer, including interactions with immune cells and immunomodulators8,9
8	KLRC4-KLRK1	is readthrough gene that encodes the KLRK1 protein, which is involved in NK cell-mediated cytotoxicity and immune response4	ATP1A2
9	TBX20		EYA2	plays a role in innate immune activation and has been associated with immune regulation in myelodysplastic syndromes10
10	CHD5		PAPSS2	is involved in the innate immune response, particularly in monocytes and neutrophils.
immune/total (%)	5/10 (50%)		7/10 (70%)
	C1D1
	Gene	Description	Gene	Description
1	SPIC	regulates the development of red pulp macrophages, which are necessary for iron homeostasis and the recycling of red blood cells	ALK	The Anaplastic Lymphoma Kinase (ALK) gene is involved in the tumor immune microenvironment and has potential applications in immunotherapy
2	CDH19		VAX2
3	BEND4		ALCAM	Also known as CD166, and encodes a cell adhesion molecule involved in T-cell activation and proliferation, playing a role in immune responses
4	POU4F1		GHR
5	CCL25	encodes a chemokine involved in the migration of immune cells, particularly T cells, to the small intestine and thymus, playing a key role in mucosal immunity	KCNS3
6	LOC283710		ADORA3	encodes the Adenosine A3 receptor, which is involved in the inhibition of neutrophil degranulation and has roles in both neuroprotective and neurodegenerative effects
7	MIXL1		TREM2	The Triggering Receptor Expressed on Myeloid cells 2 (TREM2) is expressed on macrophages, dendritic cells, and microglia, and is involved in immune responses and inflammation
8	PLA2G2D	is involved in inflammation and immune response, and its expression is correlated with immune cell infiltration and the expression of immune checkpoint genes	SYPL2
9	SYT15		FAM78B
10	FCRL2	is part of the immunoglobulin receptor superfamily and is involved in the regulation of B cell development and immune responses	ZNF91	Also known as CNBP, and is involved in the regulation of immune gene expression, particularly in myeloid cells exposed to lipopolysaccharide
immune/total (%)	4/10 (40%)		5/10 (50%)
	Week 8
	Gene	Description	Gene	Description
1	IGFL1	encodes a protein that is part of the insulin-like growth factor family and is involved in immune responses, particularly in T cells	COL11A1	is associated with immune cell infiltration in various cancers, including breast cancer, and is considered a potential target for immunotherapy. COLL11A1 is correlated with high M2-like macrophages and with poorer outcomes11, suggesting down regulation of this gene could contribute to response.
2	LCN8	is part of the lipocalin family, which is involved in innate immune responses and the regulation of immune cell functions	PTPRD	encodes a protein tyrosine phosphatase involved in the JAK-STAT signaling pathway, which is critical for anti-cancer immunity. Mutations in PTPRD have been linked to better responses to immune checkpoint inhibitors
3	FCAMR	encodes a receptor for the Fc fragment of IgA and IgM, playing a crucial role in the adaptive immune response by mediating endocytosis of these immunoglobulins	MMP2	encodes a matrix metalloproteinase involved in the breakdown of extracellular matrix and is associated with immune suppression in the tumor microenvironment. Targeting MMP2 can enhance the efficacy of immunotherapies
4	PLD5		MMP11	is also a matrix metalloproteinase and is involved in the immune response and immune microenvironment in cancers such as lung adenocarcinoma. High expression of MMP11 is associated with poor response to immunotherapy
5	CCL21	is a chemokine and is involved in the migration of immune cells, particularly T cells and dendritic cells, to lymphoid tissues, playing a key role in immune surveillance and response	CGREF1
6	SERPINA9	encodes a serine protease inhibitor that is involved in the regulation of immune responses, particularly in B cells
7	P2RX2	encodes a purinergic receptor that is involved in the regulation of immune responses through ATP-mediated signaling
8	PTPRQ	encodes a protein tyrosine phosphatase that is involved in cellular signaling and has roles in immune cell function
9	MUC4	encodes a mucin protein that is involved in epithelial protection and has been implicated in immune responses and cancer progression
10	SHISA3
immune/total (%)	8/10 (80%)		4/5 (80%)
References
1	Huang, W. et al. IGF2BP3 overexpression predicts poor prognosis and correlates with immune infiltration in bladder cancer. BMC Cancer 23, 116 (2023).
2	Liu, X. et al. Targeting IGF2BP3 in Cancer. International Journal of Molecular Sciences 24, 9423 (2023).
3	Lazetic, S., Chang, C., Houchins, J. P., Lanier, L. L. & Phillips, J. H. Human natural killer cell receptors involved in MHC class I recognition are disulfide-linked heterodimers of CD94 and NKG2 subunits. J Immunol 157, 4741–4745 (1996).
4	Tan, W. et al. Novel immune-related genes in the tumor microenvironment with prognostic value in breast cancer. BMC Cancer 21, 126 (2021).
5	Santulli, G. Angiopoietin-Like Proteins: A Comprehensive Look. Front. Endocrinol. 5, (2014).
6	Cheng, X., Luo, J. & Cao, J. Identification of HOXC Gene Family as Prognostic and Immune-Related Biomarkers in Breast Cancer Through mRNA Transcriptional Profile and Experimental Validation. Biochem Genet (2024) doi:10.1007/s10528-024-10884-5.
7	Li, M. et al. Silencing HOXC13 exerts anti-prostate cancer effects by inducing DNA damage and activating cGAS/STING/IRF3 pathway. Journal of Translational Medicine 21, 884 (2023).
8	Gao, D. et al. Expression of TMEM59L associated with radiosensitive in glioblastoma. Journal of Radiation Research 64, 833–841 (2023).
9	Shi, C. et al. Prognostic value of TMEM59L and its genomic and immunological characteristics in cancer. Front. Immunol. 13, (2022).
10	McGraw, K. L. et al. Non-del(5q) myelodysplastic syndromes–associated loci detected by SNP-array genome-wide association meta-analysis. Blood Advances 3, 3579–3589 (2019).
11	Luo, Q. et al. COL11A1 serves as a biomarker for poor prognosis and correlates with immune infiltration in breast cancer. Front. Genet. 13, (2022).

## Sheet: B_R_vs_NR_hallmark
Supplementary Table 11. The results of gene set enrichment analysis using Hallmark gene sets and the results of DE analysis between responders and non-responders performed by fgsea.
pathway	pval	padj	log2err	ES	NES	size	leadingEdge
HALLMARK_ADIPOGENESIS	0.926174	1	0.0739901	-0.226312	-0.749719	191	SLC27A1|MCCC1|UQCRC1|PPP1R15B|NDUFB7|ACLY|MDH2|SPARCL1|FZD4|MGST3|NDUFA5|SOWAHC|COL4A1|ARL4A|ITGA7|GBE1|DLD|COQ9|ADCY6|CD151|PHLDB1|RMDN3|GRPEL1|UBC|CRAT|CMBL|COQ3|REEP5|RNF11|VEGFB|AIFM1|EPHX2|PPARG|RETSAT|SSPN|JAGN1|DHRS7|UQCR11|SLC19A1|ECHS1|SULT1A1|DHRS7B|COL15A1|IDH1|NDUFS3|YWHAG|COQ5|ELOVL6|AGPAT3|IDH3G|SLC25A10|LAMA4|LTC4S|GPX4|PEX14|MTCH2
HALLMARK_ALLOGRAFT_REJECTION	1.68483e-07	4.21207e-06	0.690132	0.723498	2.11889	187	LY75|PRKCB|HLA-DQA1|IL2RA|IL7|TAP1|CD28|IRF7|STAT1|HCLS1|HLA-E|CD40|CD74|IL16|HIF1A|JAK2|SPI1|PTPN6|HLA-A|IFNGR2|IL15|ABI1|MAP4K1|UBE2D1|IRF8|CSK|ITGAL|HLA-DRA|TAP2|LCP2|ZAP70|HLA-DMA|BCL10|HLA-DMB|CCND2|FGR|SRGN|IL2RB|CD4|NCF4|CTSS|ITK|B2M|CXCR3|GBP2|CRTAM|LCK|WAS|TAPBP|CD7|CD86|NCR1|CD247|CCR1|IFNGR1|GCNT1|HLA-DOA|SIT1|PTPRC|CCR5|ST8SIA4|IL2RG|CD2|CD96|CD3E|CD3G|FCGR2B|MTIF2|CCL22|IL18RAP|CD3D|…
HALLMARK_ANDROGEN_RESPONSE	0.0482866	0.268259	0.257206	0.556301	1.47964	93	LIFR|ABCC4|GNAI3|PGM3|PIAS1|SRP19|PTK2B|SLC38A2|NGLY1|IDI1|TMEM50A|SPCS3|SGK1|ARID5B|TNFAIP8|SEC24D|HERC3|UBE2J1|B2M
HALLMARK_ANGIOGENESIS	0.274074	0.548148	0.129443	-0.441315	-1.16502	35	APP|THBD|MSX1|JAG2|OLR1|LRPAP1|FGFR1|POSTN|COL5A2|PDGFA|SERPINA5|VEGFA|JAG1|COL3A1|VAV2
HALLMARK_APICAL_JUNCTION	0.287582	0.553042	0.147331	-0.328448	-1.08168	184	FLNC|PARD6G|SORBS3|ZYX|WASL|DLG1|INPPL1|PCDH1|VCL|ADAM15|PIK3R3|PARVA|CD276|CDH8|ITGA10|CTNNA1|CLDN15|TMEM8B|NEXN|MYH10|CDH6
HALLMARK_APICAL_SURFACE	0.0931373	0.367647	0.231127	-0.523357	-1.41231	41	PKHD1|EPHB4|APP|AFAP1L2|ATP8B1|TMEM8B
HALLMARK_APOPTOSIS	0.403202	0.720004	0.0738053	0.365441	1.04236	157	GNA15|TAP1|CDC25B|BCAP31|CASP7|IRF1|BNIP3L|PSEN1|CASP8|BCL10|PLCB2|CCND2|CFLAR|DNAJC3|PPP3R1|CASP9|CYLD|CD69|CD14|IFNGR1|ISG20|CD2|CASP4|FASLG|SAT1|PMAIP1|TNF|LGALS3|IFITM3|CASP1|BRCA1|IL18|CASP3|DPYD
HALLMARK_BILE_ACID_METABOLISM	0.587087	0.838696	0.057006	0.335728	0.92114	112	BMP6|ABCA1|OPTN|IDI1
HALLMARK_CHOLESTEROL_HOMEOSTASIS	0.184	0.511111	0.168238	-0.425049	-1.24197	73	ALCAM|GUSB|GPX8|CD9|PMVK|FDFT1|CTNNB1|CPEB2|EBP|ACSS2|CYP51A1|TM7SF2|PPARG|ANXA5|TNFRSF12A
HALLMARK_COAGULATION	0.963636	1	0.0345664	0.231559	0.643161	133	FYN|LTA4H|SIRT2|PLEK|ISCU|CASP9|MMP8|PREP|MSRB2
HALLMARK_COMPLEMENT	0.00607107	0.0433648	0.407018	0.559081	1.64543	192	SPOCK2|FYN|IRF7|GCA|PSMB9|GNAI3|JAK2|USP15|CDK5R1|LTA4H|CASP7|LAP3|PLEK|GRB2|IRF1|GNG2|CPM|PSEN1|KIF2A|LCP2|APOBEC3G|PIK3R5|IRF2|CBLB|LIPA|APOBEC3F|CASP9|CTSS|MMP8|FCN1|PIK3CA|PREP|LCK|WAS|GMFB|F5|VCPIP1|PIK3CG|XPNPEP1|CASP10|CTSH|RNF4|AKAP10|C1QA|PLSCR1|CASP4|KCNIP3|USP16|LYN|FCER1G|PLA2G7|PLA2G4A|GZMB|CR1|USP8|ME1|CD59|GNGT2|LGALS3|C1QC|RHOG|CASP1|TNFAIP3|CASP3|GZMK|DOCK10|CALM3|PRCP|PIM1|CFB|I…
HALLMARK_DNA_REPAIR	0.155456	0.457223	0.134273	0.443839	1.24433	147	PDE6G|SUPT5H|POLR2I|HCLS1|TAF13|PCNA|BCAP31|GTF2H3|SUPT4H1|GTF2B|DGUOK|RALA|GTF2A2|TMED2|REV3L|RPA2|GTF3C5|RPA3|TAF12|AGO4
HALLMARK_E2F_TARGETS	0.153955	0.457223	0.130777	0.416706	1.2278	193	CDC25B|DCLRE1B|PCNA|NUP153|CHEK2|RANBP1|GSPT1|HMGB3|TUBB|GINS1|RAN|RPA2|PHF5A|RPA3|NOP56|MTHFD2|DCK|PSMC3IP|KPNA2|CIT|BRCA2|BARD1|SNRPB|RFC1|MYC|CDK4|CDKN2C|PAN2|RAD1|BRCA1|PDS5B|TIMELESS|CKS2|ORC2|ASF1A|NUP107|EIF2S1|DEK|USP1|PPM1D|BRMS1L|SRSF2|TCF19|CKS1B|SMC6|LUC7L3|CHEK1|PRDX4|CDKN3|HNRNPD|CCNE1|ZW10|RAD51C|CCNB2|ING3|STMN1|XRCC6|HMMR|DLGAP5|E2F8|ANP32E|CTCF|KIF4A|XPO1|HUS1|TIPIN|MMS22L|PLK4|…
HALLMARK_EPITHELIAL_MESENCHYMAL_TRANSITION	0.45302	0.730678	0.115734	-0.304691	-1.00937	191	DPYSL3|ITGB5|COL4A2|FBLN1|CDH6|ITGA5|COL4A1|MSX1|LAMC1|SPARC|SGCD|TGFBR3|CALD1|PLOD3|MAGEE1|TIMP3|GPC1|TPM4|SLIT3|ELN|COLGALT1|FN1|FERMT2|TPM2|GEM|LRP1|SDC4|CRLF1|RHOB|SPOCK1|LGALS1|SERPINH1|TNFRSF12A|QSOX1|TPM1|SNTB1|PMEPA1|INHBA|NID2|OXTR|POSTN|COL7A1|FBN1|ECM2|MXRA5|LOXL2|IGFBP4|ITGA2|THBS1|WNT5A|ID2|PCOLCE|COL8A2|COL5A2|LOXL1|NTM|ACTA2|TAGLN|BDNF|VEGFA|COL5A3|PDGFRB|COL1A2|COL6A2|COL11A1|EFEM…
HALLMARK_ESTROGEN_RESPONSE_EARLY	0.309446	0.573049	0.141225	-0.3225	-1.0706	188	PAPSS2|PDLIM3|TSKU|FARP1|IL17RB|TJP3|MPPED2|FDFT1|FLNB|SYT12|LRIG1|RPS6KA2|ELF3|PEX11A|KAZN|ISG20L2|RBBP8|PODXL|NADSYN1|MYBBP1A|P2RY2|SIAH2|ESRP2|PTGES|GAB2|SCNN1A|HES1|DLC1|B4GALT1|SYNGR1|AMFR|CELSR1|RARA|TTC39A|KRT19|ABAT|WFS1|IGFBP4|KLF4
HALLMARK_ESTROGEN_RESPONSE_LATE	0.488599	0.763436	0.10882	-0.297389	-0.987272	187	PAPSS2|PDLIM3|METTL3|FARP1|GALE|IL17RB|TJP3|SLC29A1|CD9|UGDH|FDFT1|NAB2|FLNB|UNC13B|PLXNB1|RPS6KA2|PRKAR2B|RBBP8|PKP3|MOCS2
HALLMARK_FATTY_ACID_METABOLISM	0.984894	1	0.0656814	-0.205179	-0.673833	151	EPHX1|PCBD1|FH|MDH2|SUCLA2|NTHL1|UGDH|PTPRG|TP53INP2|ALDH9A1|BCKDHB|DLD|SUCLG2|ACADVL|APEX1|ALAD|CRAT|ACOT8|SDHA|GCDH|PDHB|DHCR24|D2HGDH|LGALS1|PRDX6|ALDH3A2|RETSAT|AOC3|ECI1|BPHL|GRHPR|ECHS1|CPT1A|IDH1|GLUL
HALLMARK_G2M_CHECKPOINT	0.451799	0.730678	0.0675189	0.341778	1.00208	188	CDC25B|HIF1A|PRPF4B|ARID4A|CCNT1|MTF2|NUP50|PML|SRSF10|GSPT1|HMGB3|RPA2|ATRX|CDC27|DR1|PAFAH1B1|TOP1|FOXN3|KPNA2|EWSR1|AMD1|INCENP|BRCA2|BARD1|YTHDC1|E2F3|CUL5|MYC|MAPK14|CDK4|CDKN2C|SMC2|CUL3|PDS5B|CKS2|CDC45|STIL|KIF20B|HIRA|RBL1|KPNB1|E2F4|SRSF2|CKS1B|CHEK1|CDKN3|HNRNPD|CDC7|HSPA8|KIF23|CCNB2|SQLE|E2F2|BUB3|STMN1|SLC38A1|RPS6KA5|FBXO5|HMMR|CENPA|CTCF|KIF4A|XPO1|HUS1|CDC6|PLK4|LBR|ATF5|CASP8AP2…
HALLMARK_GLYCOLYSIS	1	1	0.0701132	-0.198291	-0.656892	191	GUSB|GALE|ALDH7A1|POLR3K|FAM162A|GYS1|MDH2|TPI1|PGLS|BPNT1|ALDH9A1|B3GAT3|COG2|ELF3|DLD|NOL3|SRD5A3|ECD|GPC1|B3GALT6|P4HA1|HK2|CAPN5|CLDN3|CYB5A|GNPDA1|QSOX1|B4GALT1|DDIT4|ABCB6|PGM2|CLDN9|PAXIP1|AGRN|IDH1|PPP2CB|FKBP4|HAX1
HALLMARK_HEDGEHOG_SIGNALING	0.102941	0.367647	0.21925	-0.556291	-1.46216	33	AMOT|CRMP1
HALLMARK_HEME_METABOLISM	0.660432	0.892475	0.0495902	0.29791	0.871693	185	SEC14L1|YPEL5|USP15|HTATIP2|OSBP2|TRAK2|NARF|CIR1|ACP5|MOSPD1|BNIP3L|OPTN|NNT|SYNJ1|BMP2K|BACH1|MARK3|SMOX|SLC11A2|FOXO3|GCLC|MPP1|CDC27|KAT2B|BPGM|FBXO34
HALLMARK_HYPOXIA	0.902158	1	0.0352404	0.250484	0.733587	187	ZFP36|BTG1|RBPJ|HEXA|NAGK|CXCR4|ZNF292|SLC2A3|BNIP3L|AMPD3|FOXO3|LXN|WSB1|SLC2A5|KLF6|SCARB1|RORA|XPNPEP1|PDK1|ISG20|ATP7A|MXI1|ENO1|GLRX|IDS|TPST2|ANXA2|KDM3A|PGK1|LDHA|CITED2|JMJD6
HALLMARK_IL2_STAT5_SIGNALING	0.00940964	0.0588103	0.38073	0.53499	1.57632	193	GPR83|TNFRSF9|IL2RA|CTLA4|TNFRSF8|TNFSF11|ADAM19|FLT3LG|PTGER2|FAM126B|TNFRSF1B|IL10RA|MXD1|GBP4|P2RX4|SLC2A3|IRF8|TRAF1|AHR|CCND2|GALM|CCR4|IL2RB|CDC42SE2|CAPN3|CTSZ|ITGAE|POU2F1|KLF6|RORA|CD86|IKZF4|TTC39B|PRKCH|IFNGR1|PRNP|NCOA3|CD48|RHOH|PLSCR1|SLC1A5|ABCB1|SERPINB6|ICOS
HALLMARK_IL6_JAK_STAT3_SIGNALING	0.00405433	0.033786	0.407018	0.657814	1.74873	86	IL2RA|IL7|STAT1|SOCS3|IFNAR1|TNFRSF1B|STAT2|IL10RB|GRB2|IFNGR2|CSF2RB|IRF1|IRF9|PIK3R5|CBL|PDGFC|BAK1|IL17RA|CD14|MYD88|CCR1|IFNGR1|IL2RG|IL1R1|IL15RA|OSMR|CXCL9|IL4R|TNF|IL13RA1|IL1R2|IL12RB1|STAT3|CXCL13|PTPN1|PIM1|LTB|ITGA4|IL6|CSF2RA|SOCS1|TLR2
HALLMARK_INFLAMMATORY_RESPONSE	0.000265961	0.00332452	0.498493	0.623797	1.83529	191	TNFRSF9|GNA15|IRF7|PTGER2|LPAR1|CD40|CMKLR1|GNAI3|IFNAR1|HIF1A|TNFRSF1B|IL10RA|EMP3|MXD1|MEFV|IFNGR2|IL15|ABI1|P2RX4|ABCA1|IRF1|P2RX7|PSEN1|LCP2|AHR|HAS2|PIK3R5|SEMA4D|IL2RB|GPR183|PTAFR|SLC11A2|CCR7|CYBB|PTGER4|LCK|IL7R|TAPBP|KLF6|CD69|CD14|CCRL2|EIF2AK2|RGS1|NMUR1|CXCR6|LTA|IRAK2|CD48|IL1R1|CCL22|IL18RAP|IL15RA|ATP2A2|LYN|GPR132|NMI|OSMR|MYC|CXCL9|NOD2|ATP2B1|SLAMF1|IL4R|OSM
HALLMARK_INTERFERON_ALPHA_RESPONSE	0.00017271	0.0028785	0.518848	0.728085	1.94578	95	IL7|TAP1|IRF7|PSMB8|UBE2L6|PSMB9|PARP14|CD74|TRIM21|SP110|STAT2|SAMD9|LAP3|GBP4|PSME2|ELF1|IL15|PARP9|IFI35|SAMD9L|IRF1|IRF9|PSME1|CASP8|IRF2|IFI30|TDRD7|B2M|IFIH1|UBA7|BATF2|GBP2|OAS1|CCRL2|EIF2AK2|NUB1|SLC25A28|ISG20|DDX60|TRAFD1|PLSCR1|PARP12|EPSTI1|NMI|LGALS3BP|PSMA3|IL4R|IFITM3|CASP1|CMTR1|NCOA7|SELL|TMEM140
HALLMARK_INTERFERON_GAMMA_RESPONSE	2.57304e-08	1.28652e-06	0.733762	0.72308	2.13864	198	KLRK1|HLA-DQA1|IL7|TAP1|HLA-DRB1|IRF7|PSMB8|UBE2L6|STAT1|NLRC5|PSMB9|PARP14|CD40|CD74|TRIM21|BTG1|CMKLR1|SP110|SOCS3|HIF1A|JAK2|STAT2|IL10RA|VAMP8|PTPN6|HLA-A|CASP7|SAMHD1|LAP3|GBP4|PSME2|VAMP5|RNF213|IL15|IFI35|SAMD9L|CSF2RB|IRF1|IRF9|IRF8|PSME1|PSMA2|CASP8|LCP2|HLA-DMA|IRF2|CD274|ARID5B|PML|IL2RB|IFI30|TDRD7|B2M|IFIH1|BATF2|TAPBP|ITGB7|RBCK1|RIPK1|CD69|MTHFD2|BPGM|MYD88|CD86|EIF2AK2|CIITA|HLA-B…
HALLMARK_KRAS_SIGNALING_DN	0.0986938	0.367647	0.169571	0.459708	1.32165	169	HTR1D|NR6A1|DLK2|ASB7|CDKAL1|MEFV|SLC16A7|CCR8|SGK1
HALLMARK_KRAS_SIGNALING_UP	0.121037	0.403458	0.151149	0.438603	1.28385	186	PRDM1|PSMB8|CMKLR1|TNFRSF1B|IL10RA|CLEC4A|EVI5|CXCR4|MAP4K1|IRF8|AKT2|TRAF1|DOCK2|LAPTM5|FUCA1|PDCD1LG2|F2RL1|CBL|CCND2|SCG5|WDR33|CTSS|GPNMB|IL7R|IKZF1|CD37|VWA5A|BPGM|TLR8|IL2RG|HKDC1|LCP1|GLRX|PTBP2|ABCB1|ITGB2|MTMR10|FCER1G|NIN|LY96|PECAM1|LAT2|YRDC|GPRC5B|ADAM17|RBM4|ADAMDEC1|TNFAIP3|TRIB1|CDADC1|ETS1|CFB|AVL9|CSF2RA|RABGAP1L|TMEM176A|CFH|TFPI|TMEM176B|MAP7|BMP2
HALLMARK_MITOTIC_SPINDLE	0.247191	0.528123	0.0988903	0.388181	1.14734	197	RHOF|ACTN4|ARHGAP29|ARHGAP4|ITSN1|SASS6|SOS1|RICTOR|CD2AP|ARHGEF3|ABI1|AKAP13|KNTC1|TUBD1|DOCK2|SSH2|PCGF5|ALS2|RANBP9|PLEKHG2|TLK1|CDC27|RABGAP1|ARHGAP5|BCR|PAFAH1B1|CNTRL|KIF3C
HALLMARK_MTORC1_SIGNALING	0.242165	0.528123	0.100991	0.39471	1.1624	194	ADD3|STARD4|LTA4H|PSMC4|CORO1A|ACTR2|EDEM1|CXCR4|SSR1|SLC2A3|IDI1|RAB1A|SLA|ARPC5L|NFKBIB|UFM1|PSMD14|PSMA4|IFI30|FADS2|EIF2S2|USO1|PSME3|TBK1|YKT6|PSMC6|GCLC|M6PR|SEC11A|MTHFD2|PSMD12|PDK1|GTF2H1|SLC1A5|ENO1|GLRX|SDF2L1|ITGB2|ATP2A2|CANX|FGL2|PSMA3|PGK1|DAPP1|ME1|LDHA|GLA|PRDX1|PLOD2|TOMM40|ACTR3|HSP90B1|GGA2|EEF1E1|LDLR|PPIA|SLC2A1|GPI|CTSC|FADS1|TCEA1|CFP|ACSL3|HSPA5|LGMN
HALLMARK_MYC_TARGETS_V1	0.706215	0.92923	0.045679	0.288284	0.849414	193	PCNA|PSMD8|AP3S1|PSMC4|UBA2|PSMA2|PSMA1|SET|SNRPG|SNRPB2|COX5A|PSMD14|PSMA4|RANBP1|GSPT1|SNRPA|HDDC2|PTGES3|EIF2S2|RAN|PSMA6|PSMC6|NCBP1|UBE2L3|NOP56|KPNA2|TARDBP|ERH|HNRNPA3|ACP1|EIF4E|CANX|LSM2|MYC|PGK1|CDK4|LDHA|U2AF1|PCBP1|SSB|ORC2|CDC45|POLE3|EIF2S1|DEK|SNRPD2|USP1|KPNB1|SRSF3|FBL|SRSF2|PRPS2|STARD7|PPIA|PRDX4|SRSF7|HNRNPD|PPM1G|XPOT|CCT2|CCT4|CDK2|BUB3|PSMD1|XRCC6|PSMD7
HALLMARK_MYC_TARGETS_V2	0.246073	0.528123	0.142057	-0.412456	-1.18355	58	IPO4|NOP2|TFB2M|RRP9|GRWD1|SLC29A2|NPM1|FARSA|NOP16|UTP20|RABEPK|MYBBP1A|HK2|PPRC1|WDR74|IMP4|TCOF1|SLC19A1|TBRG4|MRTO4
HALLMARK_MYOGENESIS	0.00367945	0.033786	0.431708	-0.486864	-1.60689	175	SGCA|MB|PSEN2|SORBS3|APP|MEF2D|NQO1|CASQ2|CHRNA1|CKMT2|OCEL1|MYO1C|ITGB5|LDB3|FHL1|EIF4A2|RYR1|PLXNB2|COL4A2|COX7A1|VIPR1|AK1|PTGIS|ITGA7|SPARC|SGCD|GSN|PFKM|HSPB2|FABP3|BDKRB2|TEAD4|CRAT|CDH13|ERBB3|TPM2|PDLIM7|HDAC5|SSPN|SCHIP1|MAPRE3|COX6A2|MYH9|EPHB3|MYL6B|DTNA|COL15A1|AGRN|HRC|IFRD1|FDPS|FST|ADCY9|CHRNG|MYOM2|ACTA1|TAGLN|MRAS|EFS|ABLIM1|PICK1|MYOM1
HALLMARK_NOTCH_SIGNALING	0.621359	0.862999	0.077884	-0.3302	-0.858164	32	PSEN2|NOTCH3|FZD1
HALLMARK_OXIDATIVE_PHOSPHORYLATION	0.898693	1	0.0741759	-0.235736	-0.776353	184	NDUFS2|PHB2|VDAC2|FH|AFG3L2|UQCRC1|NDUFB7|MDH2|SUCLA2|MGST3|NDUFA5|NDUFS4|TIMM17A|NDUFB5|HSPA9|COX11|NDUFV1|DLD|SLC25A4|SLC25A3|NDUFS7|MRPL34|ACADVL|NDUFV2|COX5B|GRPEL1|ATP1B1|UQCRC2|SDHA|ATP6V1F|PDHB|NDUFA9|AIFM1|NDUFC2|SLC25A5|VDAC1|CYB5A|ETFA|NDUFS6|NDUFS8|RETSAT|GLUD1|ECI1|UQCR11|ECHS1|CPT1A|IDH1|BDH2|NDUFS3
HALLMARK_P53_PATHWAY	0.563218	0.828262	0.0568864	0.319362	0.936374	189	TAP1|DRAM1|BTG1|FBXW7|PITPNC1|PCNA|NOL8|CDK5R1|VAMP8|MXD1|CCNK|DEF6|GM2A|FUCA1|CCND2|ISCU|SESN1|STOM|IFI30|RB1|DGKA|FOXO3|BAK1|VWA5A|TPRKB|TCN2|CGRRF1|TGFA|TRAFD1|RNF19B|PRKAB1|DNTTIP2|SAT1
HALLMARK_PANCREAS_BETA_CELLS	0.943299	1	0.0414044	0.230254	0.546989	30	FOXO1|SEC11A|SPCS1|STXBP1|ELP4|DPP4
HALLMARK_PEROXISOME	0.913295	1	0.0672065	-0.230448	-0.701898	102	PEX5|GNPAT|SLC35B2|CLN8|FIS1|PEX11B|ALDH9A1|PEX11A|SMARCC1|SLC25A4|GSTK1|CRAT|ACOT8|DHCR24|EPHX2|ABCC5|RETSAT|HSD11B2|CTBP1|IDH1|FDPS|IDH2|ERCC3|HRAS|PEX14|ACAA1|ALB|ATXN1
HALLMARK_PI3K_AKT_MTOR_SIGNALING	0.0703364	0.351682	0.208955	0.530745	1.43265	101	PRKCB|CAMK4|PIKFYVE|ARPC3|IRAK4|STAT2|GRB2|ACTR2|CSNK2B|CXCR4|CAB39|SLA|NFKBIB|ATF1|MKNK1|TBK1|LCK|PAK4|RIPK1|MYD88|PDK1|IL2RG|EIF4E|FASLG|MAPK9|RAC1|TIAM1|ITPR2|DAPP1|CDK4|TRAF2|ACTR3|RALB|HSP90B1
HALLMARK_PROTEIN_SECRETION	0.253499	0.528123	0.103576	0.440486	1.17398	94	ADAM10|SNX2|AP3S1|ABCA1|TMX1|STAM|TMED10|ARCN1|VAMP3|TMED2|ARFGAP3|RAB5A|STX7|SEC24D|MON2|VAMP7|USO1|YKT6|RER1|M6PR|AP2S1|COPB1|ATP7A
HALLMARK_REACTIVE_OXYGEN_SPECIES_PATHWAY	0.832781	1	0.0454059	0.277081	0.694012	47	ABCC1|FTL|LAMTOR5|MPO|GCLC|LSP1|SCAF4|PRNP|GLRX|HHEX|TXN|PRDX1|IPCEF1|PRDX4|MBP|GPX3|NDUFA6|ERCC2
HALLMARK_SPERMATOGENESIS	0.987897	1	0.0333093	0.209202	0.573652	113	CAMK4|MLLT10|SCG5|RAD17|GFI1|SLC2A5|CHFR|LPIN1|POMC|DMC1|CLVS1|MAP7|CDKN3|HSPA2|STAM2|SNAP91|TULP2|CCNB2|ELOVL3|DCC|TALDO1|PGS1|PSMG1|GMCL1
HALLMARK_TGF_BETA_SIGNALING	0.805825	1	0.045862	0.285345	0.72913	53	TRIM33|SMURF2|FKBP1A|IFNGR2
HALLMARK_TNFA_SIGNALING_VIA_NFKB	0.0870787	0.367647	0.17822	0.448641	1.32604	197	TNFRSF9|TAP1|ZFP36|DRAM1|BTG1|TANK|SOCS3|MXD1|PLEK|IFNGR2|ABCA1|IRF1|SLC2A3|TRAF1|F2RL1|BCL2A1|SGK1|CFLAR|TNFAIP8|NFAT5|GPR183|NR4A3|BIRC2|IFIH1|EIF1|PTGER4|IL7R|FUT4|KLF6|CD69|CCRL2|KLF10|RNF19B|IL15RA|SAT1|SNN|MYC|SLC2A6|LITAF|ATP2B1|TNF|YRDC|NFE2L2|IL18|TNFAIP3|EGR2|MSC|DDX58|TRIB1|CCNL1|EDN1|IL6|GCH1|TLR2|NR4A2|CCL4|LDLR|PHLDA1|BMP2|SIK1|CXCL11|SERPINB8|ETS2|IFIT2
HALLMARK_UNFOLDED_PROTEIN_RESPONSE	0.196402	0.516847	0.117766	0.447789	1.22429	105	WIPI1|EIF2AK3|EDEM1|SSR1|EXOSC1|NABP1|ATF4|SPCS3|CNOT6|EXOC2|NFYB|DNAJC3|CEBPG|HERPUD1|POP4|PREB|CNOT2|NOP56|SEC11A|MTHFD2|SDAD1|EXOSC10|EIF4E|GOSR2|PAIP1|DCP2|SLC30A5|SPCS1|TSPYL2|HSP90B1|CHAC1|EIF2S1|ERN1
HALLMARK_UV_RESPONSE_DN	0.540785	0.819372	0.0611693	0.340215	0.946725	134	FYN|ADD3|LPAR1|ABCC1|CELF2|RND3|MRPS31|HAS2|PRDM2|WDR37|PIK3CD|GRK5|ATRN|TGFBR2|ATRX|DYRK1A|GCNT1|NIPBL|YTHDC1|EFEMP1|ANXA2|MYC|MAPK14|SFMBT1|ATP2B1|SPOP|PTGFR|CITED2
HALLMARK_UV_RESPONSE_UP	0.23565	0.528123	0.157403	-0.345341	-1.13414	151	TCHH|PDLIM3|BSG|SQSTM1|TYRO3|SPR|EPHX1|CDC34|PTPRD|HNRNPU|WIZ|PDAP1|MRPL23|FGF18|PSMC3|MSX1|HYAL2|NTRK3|PRKACA|FOSB|CLCN2|SIGMAR1|SLC25A4|CDKN1C|DDX21
HALLMARK_WNT_BETA_CATENIN_SIGNALING	0.43266	0.730678	0.0776799	0.41945	1.02577	41	TCF7|RBPJ|CCND2
HALLMARK_XENOBIOTIC_METABOLISM	0.89	1	0.0756946	-0.240895	-0.80178	194	PAPSS2|CROT|BCAR1|NQO1|EPHX1|NFS1|ASL|UGDH|FBLN1|ACOX3|PGRMC1|AHCY|ALDH9A1|ACSM1|MCCC2|GSS

## Sheet: C1D1_R_vs_NR_DEgenes
Supplementary Table 12. The results of DE analysis between responders and non-responders at C1D1 performed by DESeq2.
Gene	baseMean	log2FoldChange	lfcSE	pvalue	padj
MAGEB1	10.3445	-0.000779223	0.0857296	6.74331e-13	7.07014e-09
MAGEB4	21.1051	-0.000798792	0.0857297	7.20121e-13	7.07014e-09
DHRS2	7254.91	-0.005098	0.0859309	1.09293e-11	6.41127e-08
KCNS3	1040.32	-2.14225	0.351368	1.30602e-11	6.41127e-08
SULT1C3	184.811	-0.000360808	0.0857268	1.35235e-10	5.31096e-07
ADORA3	582.409	-2.08782	0.380034	5.79617e-10	1.89689e-06
ANGPTL7	297.185	0.00616234	0.0860336	9.95909e-10	2.79367e-06
SPIC	51.822	6.82913	1.3313	1.69859e-09	4.1692e-06
SCGB1D2	292.79	-0.0101667	0.0865793	3.56023e-08	7.76764e-05
BEND4	41.0165	4.73889	1.01204	6.30918e-08	0.000123887
SCGB2A2	2688.99	-0.00224414	0.0857696	8.48361e-08	0.00015144
NAA11	16.4383	0.00076053	0.0857301	1.01778e-07	0.000166542
SLITRK6	5747.19	-0.0128441	0.0871365	1.32897e-07	0.000200736
DCD	37.7979	-0.000814884	0.0857297	1.55153e-07	0.000217614
CDH19	867.371	5.99979	2.23327	2.4516e-07	0.000300872
NINL	2583.16	1.77352	0.433305	2.34342e-07	0.000300872
VAX2	232.371	-2.90381	0.648095	2.82194e-07	0.00032595
BAIAP2L2	215.986	2.11413	0.52563	3.04152e-07	0.000331796
CTSD	122078	-0.0743942	0.145122	3.78038e-07	0.000390692
ATP6V0A4	342.291	0.0151181	0.087721	4.22132e-07	0.000414449
MZB1	2276.11	0.0187745	0.0887694	4.53995e-07	0.000424507
MUC19	3579.26	-0.0319184	0.0948554	5.64646e-07	0.000503972
ALCAM	8980.59	-2.31451	0.564767	6.29063e-07	0.000537056
ACN9	450.659	1.97698	0.491048	8.97252e-07	0.000734102
HIST1H4D	1907.17	2.55115	0.633355	9.41143e-07	0.000739212
ALK	585.159	-2.92949	0.732178	1.2097e-06	0.000913601
CCND2	11626.7	2.16179	0.538998	1.36929e-06	0.000960261
SUPT5H	15690.9	1.12174	0.268251	1.36451e-06	0.000960261
TSHR	65.7719	0.0337484	0.0958727	1.51049e-06	0.00102276
GHR	2569.45	-2.24752	0.619236	1.6078e-06	0.00105236
ATP6V1B1	1372.54	-0.0354717	0.0970105	2.52373e-06	0.00159858
CCL25	11.7449	4.12044	1.04663	3.06389e-06	0.00188008
AKR1E2	765.108	2.80357	0.867109	3.69538e-06	0.00219886
SSTR5-AS1	91.926	-0.00871626	0.0863417	3.86542e-06	0.00223168
TCEAL4	2530.93	-0.761938	0.196577	3.97784e-06	0.00223168
DNAJC22	832.655	-0.0124505	0.0870245	4.28181e-06	0.00233549
NRG1	4244.92	-0.0139618	0.087381	4.58604e-06	0.00243382
IGLL5	2415.45	0.00782986	0.0862179	5.00939e-06	0.00258854
LOC283710	160.097	3.9363	1.60037	5.34589e-06	0.00269159
SLC51A	746.168	-0.0240164	0.0907843	5.9892e-06	0.0029401
AMN	185.514	2.73884	0.742128	6.32208e-06	0.00295572
EYA2	1079.37	-0.0394619	0.0998082	6.23198e-06	0.00295572
SPHKAP	125.711	0.00140312	0.0857406	6.95e-06	0.00317373
TMEM45B	274.358	-0.0321557	0.0949364	8.88017e-06	0.00396298
POU4F1	73.5397	4.27544	1.31101	9.37395e-06	0.00409037
SCGB2A1	287.947	-0.00729834	0.0861275	9.70043e-06	0.00414082
ARHGEF38	1349.3	-0.0247262	0.0909385	1.09838e-05	0.00449327
CHRNA1	199.819	-0.0344141	0.0962404	1.0973e-05	0.00449327
STMND1	287.859	-0.00639384	0.086037	1.14269e-05	0.00457917
MIXL1	59.3616	3.74147	1.28312	1.32187e-05	0.00519125
CD79A	1028.6	0.0166251	0.0880738	1.52826e-05	0.00588409
MS4A1	2023.29	3.02763	1.30776	1.72366e-05	0.00650881
RBP4	28171.7	-0.0390054	0.099445	1.80243e-05	0.00667784
CADM2	56.7049	-0.0343625	0.0961846	2.21526e-05	0.00805535
FCRL2	167.02	3.07472	2.2991	2.46966e-05	0.00865968
MORN3	161.365	2.22315	0.69275	2.45155e-05	0.00865968
FCRL3	364.099	2.42214	0.764195	2.86587e-05	0.00970245
PIK3C2G	2321.37	-0.0147577	0.0875613	2.86209e-05	0.00970245
FAM135A	2618.72	0.945349	0.285821	2.96353e-05	0.00986302
C12orf5	496.306	0.920195	0.275369	3.01768e-05	0.00987587
ACTN4	81108.7	1.05059	0.313781	3.22262e-05	0.00988739
IBSP	109.796	-0.0447088	0.103805	3.1953e-05	0.00988739
LINC00221	29.306	-0.000306213	0.0857236	3.21994e-05	0.00988739
ZBED2	30.0938	2.91588	0.939465	3.08952e-05	0.00988739
TCF7	700.785	1.43195	0.445223	3.58444e-05	0.0108283
EFHD1	2526.96	-0.0238188	0.0905233	3.83064e-05	0.0113967
IRF4	3555.34	0.0157094	0.0877908	4.22952e-05	0.0122396
KIAA0125	294.345	0.0139626	0.0873534	4.2386e-05	0.0122396
DIO3	58.5865	-0.0187994	0.088767	4.54544e-05	0.0129064
POU2AF1	1049.76	0.0131021	0.0871667	4.60097e-05	0.0129064
TREM2	490.706	-1.50984	0.530262	4.90398e-05	0.0135626
BRINP3	6926.77	-0.00368945	0.085845	5.11718e-05	0.0136821
CYP4F8	57.3229	-0.0132437	0.0871681	5.06957e-05	0.0136821
FCRL5	2008.98	0.0116312	0.0868393	5.15624e-05	0.0136821
UBD	1147.38	0.0238324	0.0906649	5.30613e-05	0.0138921
NBPF6	290.792	0.018019	0.0885335	5.38571e-05	0.013915
CXCL9	1240.22	2.38863	0.824655	5.88054e-05	0.0148039
SLC6A15	253.643	0.00497387	0.0859399	5.8212e-05	0.0148039
BMP6	550.462	2.73837	1.565	6.36635e-05	0.0154333
FCER2	193.045	0.025875	0.0915266	6.25639e-05	0.0154333
TSKU	4744	-0.0302442	0.0934893	6.3273e-05	0.0154333
TNFRSF13C	115.454	2.07415	0.702733	6.4776e-05	0.0155115
CRHR1	52.9968	-0.0221758	0.0899437	7.25497e-05	0.016565
IFITM10	2503.11	-0.0283195	0.0924583	7.0847e-05	0.016565
LAX1	728.697	0.0174533	0.0882859	7.20486e-05	0.016565
NETO1	189.767	-0.0314726	0.0942851	7.20359e-05	0.016565
PROL1	166.702	-0.000345502	0.0857234	7.47326e-05	0.0168672
CMBL	1743.27	-0.0227431	0.0900304	7.70788e-05	0.0171169
SYT14	31.0697	0.00656145	0.0860659	7.75823e-05	0.0171169
RBM24	344.653	-0.0156632	0.0877623	8.36835e-05	0.0182579
AR	24779.6	-0.00625818	0.0860554	8.57875e-05	0.0185112
NXPH4	672.248	-0.0313643	0.0942771	8.68518e-05	0.0185372
FAM78B	155.073	-1.32136	0.442864	8.94089e-05	0.0188778
DIO1	500.829	-0.0116743	0.0868351	9.11465e-05	0.0190399
KLHDC7B	4418.87	0.010074	0.0865594	0.000105687	0.021845
GPR114	319.424	2.52183	1.21242	0.000108366	0.0221653
FETUB	545.075	-0.0236535	0.0905027	0.00011077	0.0224235
ARHGAP36	43.456	-0.00571067	0.0859969	0.000115163	0.0228744
C1orf105	13.5351	-0.0376743	0.0983412	0.000115327	0.0228744
HMSD	23.1457	2.0007	0.683076	0.000119764	0.0232002
MICA	1504.86	-0.865998	0.287579	0.000120514	0.0232002
SYT15	1195.26	3.089	1.28597	0.000118553	0.0232002
FCRL4	55.4105	0.0105086	0.0866378	0.000124516	0.0237379
ZNF91	28006.2	-1.30138	0.441469	0.000126857	0.0239515
XKR4	16.473	0.00958654	0.0865207	0.00013152	0.0245954
CD19	325.447	2.66276	1.89995	0.000144255	0.0259375
DLK1	4701.8	0.00295245	0.0857988	0.00014222	0.0259375
FFAR4	98.3565	-1.08247	0.375795	0.000143583	0.0259375
GRP	44.2247	-0.00405258	0.0858634	0.000145301	0.0259375
NBPF4	198.899	0.0137707	0.0873546	0.000140279	0.0259375
CRISP2	13.1421	0.0129834	0.087164	0.000158435	0.027262
MRPS12	1443.88	1.11993	0.395892	0.000155629	0.027262
NQO1	2231.74	-0.0276492	0.0922197	0.000157633	0.027262
PHYHIPL	78.761	-0.0284529	0.0927491	0.000159662	0.027262
TIMM50	2362.85	0.877759	0.306286	0.000159467	0.027262
CNR2	20.0874	2.73939	1.09591	0.000165492	0.0273076
DRICH1	101.606	1.38398	0.505341	0.000162977	0.0273076
TBCB	2892.86	0.903809	0.317342	0.000161473	0.0273076
TPTE2	118.752	2.01315	1.02614	0.000164282	0.0273076
PPARGC1A	917.026	2.55846	0.963083	0.000167143	0.0273501
STEAP1B	171.249	0.0371555	0.0977737	0.000171739	0.02787
KLRC2	231.129	2.2131	1.19096	0.000175006	0.0281674
PLCXD2	77.0245	1.27614	0.460272	0.000176562	0.0281868
AHSG	12319.2	-0.0202901	0.0892196	0.000180706	0.0286157
CHD5	890.385	0.0117646	0.0868486	0.000192415	0.0295092
CLCNKA	288.789	-0.0412723	0.100755	0.000195906	0.0295092
FAM196A	1966.52	-0.00434289	0.0858167	0.000190946	0.0295092
HSPA14	2928.01	1.06295	0.392258	0.000201083	0.0295092
IL1RAPL2	50.4654	-0.0176306	0.0883661	0.0001943	0.0295092
KIF19	621.774	0.0103949	0.086596	0.000199562	0.0295092
MMP25	213.958	1.42058	0.607974	0.000189504	0.0295092
OR4M2	32.932	-0.00504395	0.0859429	0.000201377	0.0295092
SEMA6A	3442.41	-0.0210564	0.0894272	0.000198517	0.0295092
SHISA3	40.0164	0.017104	0.0881243	0.000192382	0.0295092
CELF3	109.302	-0.00241548	0.0857676	0.000203425	0.0295885
ANKRD18A	1146.7	-0.0215781	0.0895212	0.000205915	0.0297305
TMEM59L	122.839	-0.0256846	0.0913627	0.000210855	0.0302215
CD27	364.204	1.90976	0.869098	0.000218646	0.0308872
PLA2G2D	186.314	3.42001	1.86641	0.000218527	0.0308872
SEPT1	623.157	1.36711	0.564795	0.000225961	0.0316926
BLK	132.937	2.08375	1.59551	0.000231616	0.0321557
PTH2R	388.956	0.0140998	0.0873959	0.000232537	0.0321557
LOC101928457	75.8474	0.00606499	0.0860126	0.000240878	0.0328464
PAX2	348.725	-0.00712408	0.0861145	0.000240671	0.0328464
TAF7L	35.5366	1.84599	0.725831	0.000243122	0.0329237
TMEM63C	1108.03	-0.00981503	0.0865168	0.000245322	0.0329942
CXCR5	50.5363	2.70435	1.23563	0.00024951	0.0333292
LOC101929272	32.2648	0.0084883	0.0863051	0.000253712	0.0336615
MGAT3	706.754	1.96283	0.806326	0.000266131	0.0350722
KCNJ10	94.9451	2.55599	1.7654	0.000269581	0.03529
C1orf95	118.604	-0.0192645	0.0888468	0.000290822	0.0378184
TRIM71	40.0688	2.874	1.28307	0.000297562	0.0384403
MIR378I	35.7076	2.13367	0.990311	0.000308126	0.0395448
FIGLA	14.3877	-0.0157114	0.0878189	0.000314901	0.0401519
PRPF18	1919.49	0.889387	0.352029	0.000331142	0.0419504
LDLRAD4	3178.46	-0.782457	0.303865	0.000333931	0.0420324
CLEC4F	237.12	-0.0181294	0.0884611	0.000348368	0.0435704
KLRC3	212.039	1.90922	1.24056	0.000355804	0.0442188
DNASE1L3	746.161	0.0208417	0.089389	0.000361915	0.0446953
HIST1H3I	2148.45	1.37739	0.583991	0.000364525	0.0447364
HSH2D	1416.28	1.40757	0.699408	0.000369276	0.0450379
C17orf104	126.357	0.00894429	0.0863929	0.000375291	0.0451851
GPC1	4088.42	-0.0575434	0.116193	0.00038391	0.0451851
HIST1H4L	1218.14	1.9695	0.847215	0.00038429	0.0451851
LOC101927870	137.409	-0.0070162	0.0861423	0.000380774	0.0451851
SYPL2	67.0999	-1.33623	0.528381	0.000376417	0.0451851
WNT16	36.2935	0.00819124	0.0863007	0.000381321	0.0451851
ZKSCAN3	740.2	0.422578	0.162507	0.000390007	0.0455844
ADAMTSL1	766.785	-1.00305	0.389464	0.000396777	0.0457407
BCRP3	425.566	-0.045841	0.104453	0.000398333	0.0457407
DCLRE1C	1729.33	0.853111	0.34466	0.000398228	0.0457407
GNB1L	197.939	0.564709	0.220493	0.000411752	0.046735
THEG	26.4986	-0.00608578	0.0860074	0.000410001	0.046735
GRIN1	185.321	-0.0180364	0.0883445	0.000415317	0.0468688
PDK1	2794.69	0.0443655	0.103231	0.000419172	0.0470335
OTOG	72.6265	-0.00658832	0.0860665	0.000431866	0.0481825
BNC1	100.992	0.0128224	0.0870803	0.000435887	0.0483532
TNFRSF17	249.853	0.009282	0.0864079	0.000438321	0.0483532
ITGB5	7878.67	-0.936545	0.405221	0.000442528	0.0485446
C1orf53	167.562	-0.0536846	0.11218	0.000452701	0.0493847
FAM71E2	19.1476	0.0245149	0.0908425	0.000457905	0.0496764
FBXO47	6.37326	0.0131949	0.0872067	0.000470229	0.0506958
HGD	3107.83	-0.00920368	0.0863954	0.000480211	0.0506958
SLC7A8	2377.79	-0.0235394	0.0902878	0.000474407	0.0506958
TMEM132C	163.04	0.00413224	0.085838	0.000476802	0.0506958
ZDHHC8	5959.38	0.839367	0.360656	0.000478594	0.0506958
AMZ1	262.673	-0.0146493	0.0874518	0.000490291	0.0514015
TNFRSF13B	68.4224	0.0104487	0.0865688	0.000492131	0.0514015
CORIN	264.109	-0.0196116	0.0888784	0.000496131	0.0515452
SYTL4	1186.98	-1.51581	0.636527	0.000501782	0.0518579
FAM221A	377.436	0.0397692	0.0994428	0.000518535	0.0533087
ETNK2	1814.59	-0.0208909	0.0892722	0.000523474	0.0535362
THRSP	861.128	-0.0137134	0.0872617	0.00053383	0.0543124
GLP2R	51.7926	0.0161477	0.0878728	0.000547626	0.0554288
XKR6	147.467	1.5748	0.804249	0.000554661	0.0558529
SIM2	689.847	0.0129715	0.0871273	0.000561367	0.0562398
IYD	347.728	-0.0157654	0.087746	0.000576373	0.0568003
KLRC1	142.818	0.0357189	0.0967319	0.000574006	0.0568003
PCDH8	119.106	0.00747525	0.0861984	0.000578532	0.0568003
ZMAT4	38.3512	-0.00568199	0.0859623	0.000573685	0.0568003
FREM2	762.22	-0.009138	0.0863623	0.000587437	0.0571036
ZDHHC22	21.667	-0.00552002	0.0859519	0.000585612	0.0571036
BTN1A1	4.86605	2.86384	1.24423	0.000596419	0.057691
GABRQ	79.7293	0.0139192	0.0873564	0.00060094	0.0578435
TAS1R3	288.943	1.8009	1.05129	0.000609226	0.058355
PMEL	203.975	-1.17757	0.959141	0.000620132	0.0591112
IRG1	11.8864	2.66628	1.32554	0.000645809	0.0612614
SPATA18	487.029	-0.0257449	0.0912441	0.000659731	0.0622811
TSPAN12	612.61	0.0481879	0.10645	0.000662909	0.0622817
NLRP11	26.6671	2.98808	1.70804	0.000673649	0.0626908
TBX20	63.1082	0.0238109	0.0905213	0.000671527	0.0626908
PCDHB6	304.083	1.79818	0.98824	0.000684896	0.0634369
SLC2A10	3111.86	-0.0209969	0.089294	0.000711747	0.0656144
CGNL1	3473.03	0.0514455	0.109564	0.000716641	0.0657568
HIST1H2BE	2221.82	0.028096	0.0924666	0.000732343	0.0668851
SLN	9.17504	-0.0203014	0.0892195	0.000753293	0.0684799
RAB11FIP2	1606.18	0.376512	0.158777	0.000769499	0.0696308
SPECC1	2784.72	-1.31423	0.580459	0.000773083	0.0696342
NOTUM	464.706	2.03701	1.03029	0.000785291	0.069657
SLC48A1	536.346	-0.772585	0.342624	0.000781982	0.069657
SNAP91	21.6043	0.00810171	0.0862577	0.000777214	0.069657
TUBB2B	1606.72	0.0191815	0.0887196	0.000787526	0.069657
OR1F1	14.6003	0.0121287	0.0869333	0.000800322	0.0704714
CATSPERB	965.754	-0.0279494	0.092413	0.000819005	0.0717945
TXNDC5	248.805	0.0328445	0.0948506	0.000832986	0.0726956
FDCSP	8385.16	0.00249504	0.085769	0.000840218	0.0730023
GUCY2EP	34.2803	-0.00875984	0.086323	0.000856031	0.0734019
SLC26A5	80.0141	-0.0099911	0.0865521	0.000855656	0.0734019
TMEM253	42.0719	-0.033333	0.095198	0.000850367	0.0734019
SNX31	21.4258	-0.0260361	0.0914364	0.000872305	0.0744721
BDKRB2	343.507	-0.0223184	0.0897582	0.000882983	0.0750574
CYP2C9	9873.52	-0.0101351	0.0865433	0.000896723	0.0758968
CFHR1	5991.38	0.0141173	0.0873577	0.000911841	0.0768451
HOXB-AS3	32.6477	-0.0080662	0.0862124	0.000929826	0.0776939
MPV17L	980.826	-0.0265598	0.0916089	0.000928813	0.0776939
TPRG1	1483.72	-0.0131107	0.0870704	0.000936827	0.0779395
ZNF507	2847.6	0.690622	0.318589	0.000940704	0.0779395
MIR365B	36.3194	-1.43676	0.689055	0.000953371	0.0786571
DYNC1I1	149.821	1.47015	0.783495	0.000959145	0.0788024
MEOX1	96.1043	0.0159551	0.0877934	0.000979722	0.0801576
LRRC75B	693.032	-0.0348492	0.0959145	0.000986087	0.0803436
KCNA2	116.437	0.0130031	0.0870727	0.0010085	0.0818298
GALNT8	34.2801	1.10014	0.546353	0.00101969	0.0823976
SLC52A1	209.848	0.0144939	0.0874646	0.00103048	0.0829284
ABCC2	4706.58	-0.0255921	0.0912757	0.00104283	0.0832398
ZNF772	908.989	-0.88993	0.48489	0.00104188	0.0832398
CHST1	2448.64	-0.00765944	0.0861932	0.00105146	0.083589
HOXC13-AS	11.132	-0.0351418	0.0963175	0.00105735	0.0837186
SLC24A2	75.031	-0.0153716	0.0876097	0.00106664	0.0841146
CCDC8	1908.75	1.96041	1.29524	0.00107678	0.0842376
RPS16	13947.7	0.0829935	0.158607	0.0010761	0.0842376
GPR50	6.23429	0.0210251	0.0894459	0.00109768	0.0855323
CCBL2	1216.61	0.576588	0.28242	0.00110487	0.0857519
CTSW	366.923	0.0200459	0.0889977	0.00115008	0.0885607
PPP2R2A	3420.72	0.698925	0.392417	0.00114732	0.0885607
KCNQ1	1165.77	-0.974321	0.483138	0.00117637	0.0885998
OSR2	946.771	-0.0163126	0.0878551	0.00117766	0.0885998
OXGR1	37.3027	-0.00781785	0.0862299	0.00116902	0.0885998
RAB19	360.362	-0.023299	0.0900629	0.00117358	0.0885998
RET	29458.7	-0.00541859	0.0859596	0.00116614	0.0885998
TTPA	1333.83	-0.0216279	0.0895817	0.00116701	0.0885998
ABCB11	2992.68	0.0149404	0.0875667	0.00120407	0.0902412
LOC100996693	15.4289	-0.0337592	0.0955044	0.00122386	0.0910397
MOCS2	1241.1	-0.858974	0.519862	0.001224	0.0910397
AQP3	4329.79	0.0151069	0.0875444	0.00123011	0.0911487
BCAR4	47.7281	0.0064103	0.0860633	0.00125136	0.0920285
NLRP7	219.356	0.0124505	0.0869732	0.0012472	0.0920285
ATP2B2	1306.61	-0.0109593	0.0867114	0.00128963	0.0929753
IGFBP1	1231.25	-0.00573213	0.0859433	0.00127403	0.0929753
JSRP1	222.737	0.0121073	0.0869194	0.00127203	0.0929753
PLD5	21.292	0.0112681	0.0867479	0.00128066	0.0929753
RBMXL2	15.4929	0.0120563	0.0869421	0.00129264	0.0929753
USP6NL	4358.46	0.0354696	0.0964931	0.00128924	0.0929753
NTRK2	10604.7	0.0141507	0.0873501	0.00132933	0.0949193
RAP2C	1488.09	-0.623231	0.330917	0.00132843	0.0949193
VTN	19610.5	0.00944873	0.0864378	0.00134482	0.0956769
CCDC149	1197.6	-0.726688	0.354657	0.00136473	0.0962061
GZMB	246.744	0.0214948	0.0896111	0.00136695	0.0962061
XPO6	8787	0.438091	0.215224	0.00135778	0.0962061
NCCRP1	1294.4	0.011782	0.0868075	0.00139073	0.0975297
RUFY3	3926.19	0.59859	0.30123	0.00139665	0.0975964
HMGN5	377.102	-1.04297	0.656829	0.00140481	0.0978188
MC5R	9.82996	-0.00800612	0.0862463	0.00141216	0.097983
GIPC3	909.393	-0.974822	0.490894	0.00144066	0.098912
PTPRD	1230.67	-1.40981	0.732989	0.00143776	0.098912
ZBTB7C	475.976	-0.0257453	0.0913561	0.00143554	0.098912
FAM46C	3179.88	0.022957	0.0901348	0.00144768	0.0989509
TMEM213	9.65793	0.00552983	0.0859877	0.00145131	0.0989509
CXCL13	378.513	0.0145187	0.0874719	0.00149391	0.0995158
FRMPD2	26.2534	-0.0182614	0.088511	0.0014907	0.0995158
GPR15	20.5213	2.1996	1.24266	0.00148716	0.0995158
OR6A2	10.9868	0.0180098	0.0884215	0.00148856	0.0995158
TBC1D19	823.626	-0.625501	0.322351	0.00147405	0.0995158
ZBTB32	87.7746	0.030138	0.093359	0.00149507	0.0995158
ZIC1	323.426	0.00668781	0.0860528	0.00147117	0.0995158
STK31	137.167	0.0183607	0.0885114	0.00150163	0.0996149
AZGP1	15569.1	-0.0162912	0.0878505	0.00153241	0.10106
GSTM1	2221.05	0.0024707	0.0857652	0.00154551	0.10106
HHATL	15.5997	-0.0187338	0.0886197	0.00155258	0.10106
IGF2BP3	396.232	0.0132184	0.0871625	0.00153983	0.10106
NTF4	69.931	-0.0130341	0.0870492	0.0015543	0.10106
SIPA1L2	7138.08	-0.913391	0.510634	0.00154914	0.10106
DEGS2	1389.11	-0.00931454	0.0863897	0.00156455	0.101391
FAM21B	916.613	0.015797	0.0877276	0.00159154	0.102801
ZSCAN12	652.173	1.02821	0.58068	0.00163045	0.104969
KCNU1	39.5684	-0.00413982	0.085847	0.00172343	0.110593
C1orf186	209.427	0.0104217	0.0865779	0.00173613	0.110836
TEX9	899.418	-0.955931	0.520463	0.00173852	0.110836
EYA4	150.268	-0.0190876	0.0887479	0.00174946	0.111173
APOL3	1942.52	0.0508977	0.108714	0.00176666	0.111855
C1orf127	91.4434	-0.0342935	0.0956789	0.00177159	0.111855
ISL2	53.7075	0.0152437	0.08764	0.00177994	0.112022
NPPC	85.1804	-0.00832742	0.0862367	0.00181678	0.113145
RBMXL1	1841.29	0.489406	0.262148	0.00180773	0.113145
SERPINA5	2953.22	-0.00712805	0.0860351	0.00182083	0.113145
ZNF812	373.221	0.00538242	0.0859627	0.00181976	0.113145
EID2	497.666	0.0728514	0.13744	0.00183986	0.113609
LTA	71.5345	1.0112	0.636149	0.00183766	0.113609
CYP2B7P	2818.61	-0.00139976	0.0857139	0.00185431	0.114142
AGTPBP1	3502.47	0.59383	0.32461	0.00186152	0.114228
ACSM1	473.306	-0.0188437	0.0885576	0.00188019	0.114738
POLR2I	1807.03	0.0890729	0.172042	0.00188153	0.114738
TOX4	4774.56	-0.456381	0.245704	0.00188869	0.114818
SCUBE1	6998.21	-0.0080847	0.0862001	0.00194898	0.117352
TMPRSS9	197.4	-0.0127286	0.0869788	0.00195428	0.117352
UPF2	7252.23	0.0831261	0.157553	0.00195284	0.117352
ZNF90	533.361	0.0217591	0.0895924	0.00194939	0.117352
APOBEC3D	973.032	0.0300896	0.0932263	0.00196397	0.117575
SUV39H2	1356.27	0.0459984	0.104246	0.00197898	0.118113
GPX7	310.14	0.0342577	0.0956837	0.00198842	0.118317
NUGGC	972.697	0.0131568	0.0871137	0.00199801	0.118529
GLCCI1	1868.15	0.0886486	0.168819	0.00203256	0.120215
EPHX1	18961.6	-0.0281913	0.0922455	0.00204784	0.120755
PRDM6	249.247	-1.11911	0.80699	0.0020785	0.121831
SEL1L3	6115.32	0.0306114	0.0935749	0.00207567	0.121831
PSMD8	6587.16	0.0631339	0.122672	0.00208865	0.121943
SLAMF1	324.999	0.0210277	0.0893481	0.00209282	0.121943
WNT10A	87.6885	0.0511574	0.108937	0.002119	0.123103
FCRL1	160.411	0.0102399	0.0865385	0.00213675	0.123768
ADORA1	1511.83	-0.0235267	0.0902702	0.00214417	0.123832
ANKK1	81.9967	-0.023577	0.0902729	0.00216489	0.124662
ATP6V0A2	2497.71	0.5833	0.336395	0.00217674	0.124978
C2orf72	409.107	-0.0187987	0.0886399	0.00219087	0.125058
GDF15	713.323	-0.0100234	0.0865018	0.00218877	0.125058
ANKRD34A	177.487	-0.0396197	0.0988069	0.00224297	0.126059
CNTN1	860.362	-0.0290806	0.0927844	0.00223092	0.126059
ECHDC3	730.761	0.0244199	0.0906143	0.00225335	0.126059
ELOVL7	453.934	-0.997303	0.730271	0.00224603	0.126059
MESP1	96.0367	0.0301402	0.0933295	0.00224279	0.126059
NLRP12	144.606	-0.888028	0.601301	0.00225237	0.126059
YIF1B	2654.55	0.0406031	0.0996989	0.00224207	0.126059
CLGN	677.989	-0.00586693	0.0859642	0.00229434	0.127762
SDHAF1	125.896	0.957146	0.607875	0.00229681	0.127762
MSANTD4	845.484	0.0486994	0.106539	0.00230785	0.128014
MUC6	7724.53	-0.00271361	0.0857872	0.00231558	0.128081
RSPO1	40.4638	0.014511	0.0874701	0.00234571	0.129383
FAM86JP	262.589	-0.0310108	0.0936329	0.00235479	0.12952
GULP1	556.176	-0.0335703	0.0952625	0.0023827	0.130689
ERVV-2	71.744	0.00413237	0.0858588	0.00240028	0.131179
IGDCC3	85.9611	-0.00595829	0.0859958	0.002405	0.131179
SPAG4	433.542	0.0485695	0.106341	0.00244817	0.133164
CHRNB2	225.062	-0.00392682	0.0858377	0.00247554	0.133525
EDAR	157.31	0.0101052	0.086564	0.00249498	0.133525
GFI1	260.024	0.0228519	0.0899769	0.0025092	0.133525
RASGEF1C	146.265	0.00706132	0.0860959	0.00250621	0.133525
SALL3	129.505	0.00408562	0.0858226	0.00250913	0.133525
TTC18	681.443	-0.941938	1.19064	0.00247465	0.133525
VSIG2	123.504	0.566377	0.390235	0.00250668	0.133525
ZNF442	447.241	-0.708537	0.506838	0.00248458	0.133525
FCRLA	78.2658	0.0163951	0.0878865	0.00252706	0.13375
PHLDA2	575.227	-1.05335	0.723979	0.00252269	0.13375
CGB7	33.5143	-0.0311577	0.0936795	0.00254177	0.134167
SSTR5	32.0792	-0.00593213	0.0859798	0.00260782	0.137285
OCA2	86.6454	0.00764959	0.0861563	0.00266607	0.139602
RIPPLY3	81.0137	-0.00641232	0.0860453	0.00266287	0.139602
COLGALT2	94.6008	-0.0161022	0.0878385	0.00268102	0.140012
CNTN3	442.625	-0.0117932	0.0867909	0.00269075	0.140148
CTNND2	1348.49	-0.00737452	0.086126	0.00270807	0.140677
NCR1	44.6782	0.0240632	0.0905139	0.00272759	0.141317
SLC12A1	198.073	-0.00894665	0.0863425	0.00274476	0.141832
KLHL13	799.735	-0.020212	0.0890343	0.00276272	0.142222
ZNF133	1887.29	0.451765	0.275775	0.00276679	0.142222
MB	536.276	-1.1745	1.67277	0.00278383	0.142724
EPPK1	37117.7	-1.23056	0.883133	0.00283497	0.144216
GJB3	295.037	0.00304765	0.0857832	0.00282075	0.144216
RASD1	816.711	-0.00923984	0.0863922	0.00283115	0.144216
CEACAM3	81.6954	0.0342561	0.0955028	0.00286069	0.144774
KCNH1	142.251	-0.00615543	0.0860113	0.0028544	0.144774
KIR3DL2	19.4518	0.0174934	0.0882399	0.00287788	0.14527
GALNT13	230	0.0145519	0.0874402	0.00291753	0.146894
AZU1	47.6355	-0.0132195	0.0870758	0.00294504	0.147142
CD38	983.252	0.0165963	0.0879685	0.00294774	0.147142
FOXC2	685.958	0.012553	0.087012	0.00293251	0.147142
NKX2-2	240.61	-0.0014869	0.085744	0.00295992	0.147142
TEPP	15.8904	0.0154812	0.087679	0.002955	0.147142
HOXB8	85.6182	-0.0163784	0.0879621	0.00298115	0.147823
IRF1	2038.13	0.0503038	0.107756	0.0029923	0.148002
PAPLN	1889.25	0.0374452	0.097459	0.00302075	0.149034
LOC101929558	9.86744	-0.0128648	0.0870568	0.00305888	0.150537
PGR	8155.71	-0.00445912	0.0858505	0.0030984	0.1521
KMT2B	18641.6	0.571241	0.389568	0.00312209	0.152181
PPP1R16B	697.68	0.0307652	0.0935304	0.00312991	0.152181
SOX30	40.5617	0.0269733	0.0918033	0.00312811	0.152181
TBX21	213.654	0.0232633	0.0901633	0.00313105	0.152181
METRN	2021.85	-0.0263272	0.0912685	0.00315113	0.152779
KLK11	189.627	0.00583882	0.0859838	0.00323883	0.156644
MAP7	3739.71	0.0474366	0.105286	0.00325185	0.156888
MEGF10	233.497	-0.0306769	0.093535	0.00333847	0.160672
CCR2	680.947	0.0175633	0.088181	0.00334691	0.160684
TRIM69	127.602	1.06404	0.945487	0.00339572	0.16263
LTF	6361.08	0.00515542	0.0859375	0.00343341	0.163637
WDR66	470.057	0.0397963	0.0989117	0.00342868	0.163637
LINC00470	47.3955	0.00363532	0.0858235	0.00347306	0.165126
FER1L4	1761.05	0.0250735	0.0908459	0.00351866	0.16689
GDF5	141.225	0.0105407	0.0866483	0.00358785	0.169354
IRS4	19.5492	-0.00681514	0.086066	0.00358402	0.169354
WNT11	317.702	0.0159269	0.0878316	0.00360129	0.16958
TTLL10	188.55	0.0160551	0.0877827	0.00361723	0.169923
GOLGA7B	70.7721	-0.0245612	0.0906068	0.0036334	0.170276
IL20	240.348	-0.00147103	0.0857417	0.00376698	0.175879
P2RX1	304.321	0.0185341	0.0884565	0.00377088	0.175879
PIM2	1935.25	0.020156	0.0890051	0.00378842	0.176079
VAT1L	67.182	0.0256671	0.0911314	0.0037931	0.176079
CDC123	3716.79	0.0578283	0.115556	0.00384188	0.177247
GPR55	20.6132	0.0172522	0.0881484	0.00383437	0.177247
GPX8	783.346	-0.780901	0.599614	0.00384534	0.177247
NRIP3	937.467	-0.00830066	0.0862182	0.00389104	0.178515
ZNF219	1907.88	-0.0518756	0.109097	0.00388315	0.178515
SAMD4B	10478.2	0.104947	0.21758	0.00390218	0.178609
ENKD1	572.326	-0.511252	0.365808	0.0039141	0.178738
TRIM63	22.5454	-0.0116398	0.0868379	0.00392352	0.178752
CACNG4	2687.56	-0.00646546	0.0860171	0.00397726	0.180364
ZFR2	29.4843	0.0134756	0.0872124	0.00397489	0.180364
C1orf168	606.282	-0.00382228	0.0857808	0.00403725	0.182242
PTPRCAP	582.088	0.0322263	0.0942491	0.00402932	0.182242
CD79B	223.921	0.0178207	0.0882625	0.00405325	0.182282
TNR	66.46	-0.0105769	0.0866124	0.0040567	0.182282
SPINK5	1066.59	0.0168845	0.087993	0.00406846	0.182393
CTSE	118.327	0.0171925	0.0881211	0.0040819	0.182579
MUC7	14.653	0.00759417	0.0861831	0.00413333	0.184459
CAPN13	1225.39	-0.00885011	0.0863318	0.00416719	0.184915
LRRC37B	1780.58	0.330851	0.207753	0.00417885	0.184915
MCM10	1451.08	0.0247124	0.0907124	0.0041812	0.184915
ZNF215	378.803	0.0176231	0.0881885	0.00415731	0.184915
EEPD1	732.17	-0.570038	1.11232	0.0042057	0.185027
STARD13	1802.36	-0.498911	0.367993	0.00419808	0.185027
UGT3A2	27.2802	0.0137967	0.0872742	0.00421201	0.185027
OR4N4	54.5113	-0.00101449	0.085734	0.00424221	0.185937
SCUBE2	12706.1	-0.00618957	0.0860069	0.00426266	0.186418
VN1R1	154.658	-0.0338709	0.0950221	0.00428064	0.186788
IGLL1	20.8787	0.0121278	0.0868882	0.00429316	0.186919
FBXO18	7178.63	0.0705434	0.132253	0.00430544	0.187003
PGLYRP4	38.013	0.0015885	0.0857417	0.00432365	0.187003
RTP3	277.98	0.00158595	0.0857432	0.00431627	0.187003
IGJ	4297.43	0.0114383	0.0867528	0.00433883	0.187247
PKNOX2	211.22	0.0229365	0.0900394	0.00437784	0.188516
IL5RA	32.3506	0.015253	0.0875968	0.00439792	0.188966
BTNL10	29.3812	-0.0107608	0.0866481	0.00444517	0.190164
ZBTB16	2163.9	-0.0161131	0.0878505	0.00443842	0.190164
CAMK2B	749.582	-0.00552064	0.0859392	0.00446865	0.190637
LSM14A	12786	0.0857425	0.160171	0.00447565	0.190637
ABCB1	1392.49	0.019811	0.0889014	0.00452359	0.19114
PAF1	2995.62	0.0726473	0.135238	0.00451431	0.19114
PRDM13	22.1326	0.00551206	0.0859819	0.00452639	0.19114
SHKBP1	4374.81	0.108812	0.214573	0.00449811	0.19114
PPP1R27	51.1823	-0.0156015	0.0876748	0.00455177	0.191799
ASB14	12.0231	-0.0395339	0.0989273	0.00458492	0.192621
LYRM7	389.512	-0.381578	0.279717	0.00459088	0.192621
CLDN11	290.075	0.0174029	0.0881537	0.00462628	0.193031
KANK4	1702.51	0.0116402	0.0868448	0.00462377	0.193031
UGT2B17	1031.9	0.0119519	0.0868674	0.00463015	0.193031
FLJ22184	3213.34	-0.00778792	0.0861346	0.00468799	0.195028
EFCAB5	63.2554	0.0358685	0.0964767	0.00472617	0.196201
HRG	25252.1	-0.0150548	0.0875593	0.00477052	0.196691
NMUR1	74.0736	0.737454	0.88984	0.00475757	0.196691
OPN4	11.5637	-0.0181762	0.0883991	0.00477803	0.196691
PLEKHD1	107.419	-0.016082	0.087815	0.00476546	0.196691
LRP2	13257.7	0.0105909	0.0866333	0.00486973	0.200046
SPDYC	262.081	0.00915134	0.0863608	0.00491139	0.200917
SULT1B1	153.023	0.0148324	0.0874409	0.00491083	0.200917
NPNT	7402.29	-0.00918971	0.0862954	0.00497395	0.203053
BEND7	762.389	0.0175377	0.0882225	0.00501023	0.20411
CXCL11	628.115	0.0160797	0.0878411	0.00508973	0.206919
OR4N3P	26.5302	-0.00437419	0.0858433	0.00512687	0.207998
GBP4	2738.45	0.0316136	0.0939959	0.00515689	0.208726
MIR556	9.01795	-0.00854539	0.0862762	0.00516608	0.208726
RPL3L	14.18	-0.0120386	0.0868677	0.00518733	0.209155
GCNT1	1664.8	0.0603278	0.118107	0.00519903	0.209197
S100B	112.629	0.0114515	0.0867626	0.00521285	0.209324
FAM107A	85.6785	0.0182178	0.0884189	0.00524251	0.210086
KCNA3	1014.24	0.0180726	0.0883038	0.00527549	0.210138
MMP9	5318.38	0.017153	0.0880247	0.00527667	0.210138
PDCD5	3225.69	0.0624235	0.120611	0.00528131	0.210138
RHOF	724.588	0.0349931	0.0956952	0.00528662	0.210138
CLIC5	198.976	0.0248896	0.0907427	0.00534153	0.211616
S100A7A	142.495	0.000173033	0.0857246	0.00534536	0.211616
GAD1	51.3647	-0.0191719	0.0886284	0.00539661	0.213096
LMO4	2003.7	0.0381004	0.097829	0.00540445	0.213096
ZNF607	1511.18	0.0507627	0.107832	0.00543482	0.213864
ABCC5	9216.96	-0.0280164	0.0920235	0.00545621	0.214276
INPP4B	3433.11	-0.0392545	0.0984835	0.0054991	0.2151
TRIM67	51.4523	-0.00397417	0.085802	0.00549693	0.2151
KCNH7	35.9379	0.00830416	0.0862707	0.00554156	0.215901
SETD9	518.254	-0.0348304	0.0955661	0.00553881	0.215901
ASPN	4368.51	-0.0255505	0.0909397	0.00560361	0.216
COX6B1	5171.81	0.419692	0.406923	0.0056101	0.216
LZTS3	853.392	0.0311196	0.0937011	0.00559049	0.216
NPW	36.4888	0.0258841	0.0911991	0.00558842	0.216
PRKCZ	2155.12	0.103818	0.205143	0.00557241	0.216
SCG3	5.43032	0.0131413	0.0871456	0.00560652	0.216
COL20A1	143.057	-0.0113666	0.0866745	0.00564583	0.21695
C2orf88	59.1904	0.0147206	0.0874471	0.00567904	0.2178
ARID3B	695.882	0.0738678	0.136004	0.00574631	0.2181
DMC1	94.1785	0.0172522	0.0880969	0.0057646	0.2181
EGR1	5486.79	-0.0532493	0.110034	0.00575421	0.2181
FAM196B	27.9541	-0.02894	0.0925032	0.0057161	0.2181
FOXO3	4605.26	0.0381264	0.0978036	0.00573626	0.2181
MKNK2	11192.9	-0.386448	0.589875	0.00575411	0.2181
SERPINA3	31396.8	-0.00566905	0.0859535	0.00573045	0.2181
ARHGEF40	4739.32	-0.0495034	0.106594	0.0057816	0.218322
PAH	17125.7	-0.000712141	0.0857186	0.00580462	0.218702
TTC39A	2190.61	-0.0162696	0.0877733	0.00581393	0.218702
HELB	2182.28	0.056123	0.112895	0.00584722	0.219114
LOC101928051	17.3149	0.0184409	0.0885101	0.00583678	0.219114
CCR7	197.785	0.0297797	0.0930161	0.0058614	0.219156
CXCR3	323.825	0.0217461	0.0895214	0.00587065	0.219156
SOSTDC1	99.4067	0.00564826	0.085979	0.00588221	0.219171
RCAN2	274.591	-0.0409423	0.0998298	0.00590407	0.219569
AKR1C2	2663.81	-0.0155123	0.087563	0.00591736	0.219647
SDK2	3919.28	-0.00537909	0.0858598	0.00593734	0.219973
KLRF2	6.16871	0.0106261	0.0866361	0.00598045	0.221153
KIAA1045	81.8548	0.0103295	0.0865915	0.00606223	0.223217
MAPT	1404.61	-0.00682158	0.0860762	0.00605494	0.223217
MYO9A	9339.08	0.0867701	0.158409	0.00608175	0.223217
NBPF22P	13.065	0.00867949	0.0863333	0.00607307	0.223217
TLN2	2436.67	-0.48215	0.488319	0.00610616	0.223695
ABCB5	72.9273	-0.0143241	0.0873972	0.00624879	0.228494
NKG7	332.199	0.0193988	0.0887796	0.00626934	0.228819
CHD8	15984.4	-0.336205	0.28065	0.00633078	0.228934
COL9A1	41.5801	0.0106023	0.0865991	0.00632373	0.228934
ELL3	430.207	-0.0443747	0.102022	0.00630497	0.228934
OR2AG2	13.8779	0.0163474	0.0878621	0.00630027	0.228934
TTC9	789.173	0.0346678	0.0955071	0.00631786	0.228934
KLRC4	207.759	0.0153981	0.0875618	0.00636891	0.229468
SEC14L1	9420.9	0.0636423	0.121409	0.00636009	0.229468
IDO1	1914.46	0.0113589	0.0867392	0.00642432	0.23104
CTDP1	1669.35	0.36574	0.345582	0.00646263	0.231993
ITM2C	4693.03	0.0288911	0.0924865	0.00652976	0.233975
HTN1	242.311	0.000524668	0.0857276	0.0065692	0.23496
TMTC1	1152.1	-0.0332626	0.0948326	0.00658121	0.234961
LPHN3	548.547	0.0188138	0.0886103	0.0065938	0.234983
HIST1H2BB	1218.9	0.0220044	0.089672	0.00660637	0.235005
KCNB1	250.286	-0.00727365	0.0861488	0.00667105	0.236023
PTPRZ1	1940.25	0.00385796	0.0858097	0.00665943	0.236023
UGDH	5484.39	-0.0410718	0.0994453	0.00666421	0.236023
SZT2	13754.5	0.301259	0.237782	0.00669371	0.236399
ASIC4	42.3171	-0.0199008	0.0889073	0.00673438	0.236434
DPY19L3	3171.45	0.327173	0.314155	0.00675116	0.236434
ESPN	1774.44	-0.033145	0.0948323	0.00675492	0.236434
NUP62CL	110.741	0.021019	0.0892092	0.00675119	0.236434
TM4SF1	6207.49	0.0202011	0.0890422	0.00671443	0.236434
ACOXL	241.643	0.0164546	0.0879405	0.00685068	0.237684
LGALS7B	214.25	0.00686767	0.0860848	0.00682039	0.237684
LILRA4	328.394	-0.0263956	0.0911594	0.00685116	0.237684
MSMB	155.563	-0.00471172	0.0858994	0.00681693	0.237684
TOX2	291.125	0.0434367	0.101456	0.00682939	0.237684
BEND5	131.568	0.0322877	0.0942793	0.00688934	0.238587
ARHGAP26	3282.51	-0.0453497	0.103131	0.00694052	0.239937
SH2D1B	18.6699	0.0212563	0.0893969	0.00696625	0.240403
AP4B1	1261.39	0.0900373	0.166292	0.00703252	0.241791
BDNF	37.0293	-0.0121432	0.0868273	0.0071033	0.241791
C11orf85	38.7925	0.00728129	0.086127	0.00703122	0.241791
MUC16	69402.8	0.00862383	0.086302	0.00706102	0.241791
PNOC	75.3784	0.00920506	0.0863753	0.00707295	0.241791
SLC9A4	10.143	0.0063119	0.0860471	0.00705201	0.241791
SMARCD3	1132.75	-0.0280858	0.0920365	0.00710498	0.241791
ST7-AS1	33.5729	0.0437121	0.101694	0.00708054	0.241791
WHAMMP2	93.825	-0.0604045	0.117515	0.00715202	0.242971
ABHD4	1090.48	-0.0557945	0.112132	0.00728476	0.244107
ATP10B	166.852	0.0167656	0.0880194	0.00728368	0.244107
CEP128	2582.7	0.0380733	0.0976593	0.00739183	0.244107
DLX1	83.1886	-0.00541212	0.0859488	0.00739682	0.244107
FSIP1	1491.95	-0.00449616	0.0858765	0.00732691	0.244107
GAMT	1626.83	-0.0206999	0.0890633	0.00732613	0.244107
GBP5	3046.26	0.0182145	0.0883687	0.0072994	0.244107
GJC3	40.7995	-0.021053	0.0892636	0.00728122	0.244107
KIRREL3	58.1004	0.0145143	0.0873886	0.00739091	0.244107
MIR4652	17.8749	0.00457813	0.0858987	0.00726465	0.244107
NUDT5	2950.62	0.0673315	0.126387	0.00725253	0.244107
PCDH20	108.36	-0.0131978	0.087044	0.0072506	0.244107
SLC27A1	1951.75	-0.0484258	0.105577	0.00736379	0.244107
TTC5	686.546	-0.0839599	0.153697	0.00730661	0.244107
WNK3	1320.52	0.01212	0.0868475	0.00736775	0.244107
ZBP1	717.768	0.0180147	0.088326	0.00735529	0.244107
ZSCAN31	725.425	0.0447835	0.102531	0.00723268	0.244107
DLL3	102.947	0.0168378	0.0880374	0.00742348	0.244576
H19	79921.6	0.00982671	0.0864325	0.00753256	0.246515
LOC401010	110.466	0.0529736	0.109709	0.00752512	0.246515
MUC20	4102.16	-0.0356411	0.09621	0.00753125	0.246515
TBX10	14.2346	0.00294756	0.0857964	0.00752462	0.246515
TFF3	950.329	-0.00359358	0.085824	0.00754511	0.246515
ARHGDIG	47.0391	-0.00358772	0.0857958	0.00759599	0.247766
ZBED6CL	266.474	0.0662468	0.124782	0.0076916	0.250468
CRIM1	8041.71	0.0594834	0.116233	0.00779346	0.252946
KLRC4-KLRK1	42.6856	0.013469	0.08714	0.00778885	0.252946
CYSLTR2	63.5877	0.0391155	0.0981987	0.00787949	0.254577
EDARADD	612.92	-0.0173208	0.0879884	0.00789557	0.254577
GPR98	15062.8	-0.00442122	0.0858643	0.00787636	0.254577
INPP5B	2492.86	0.0760249	0.138908	0.00789349	0.254577
FRRS1L	5.57114	0.0151742	0.0875886	0.00793595	0.25546
FOXA1	8144.19	-0.0043283	0.0858741	0.00800526	0.256951
HOXB9	44.1726	-0.00677316	0.0860838	0.00800847	0.256951
CAMK1	599.853	-0.0541821	0.111036	0.00806662	0.257974
CHCHD6	384.927	-0.0842284	0.152674	0.00805455	0.257974
PRB3	29.1611	-0.00479955	0.08591	0.00809951	0.258605
PDCD2L	368.92	0.0368183	0.0968677	0.00815145	0.259829
PRF1	459.583	0.0212649	0.0893884	0.00816431	0.259829
CLEC17A	52.8984	0.0117023	0.0867641	0.00818817	0.260024
LGALS17A	14.8961	0.0112959	0.0867227	0.00821017	0.260024
NFKBIB	1205.94	0.04188	0.100245	0.00820754	0.260024
BANK1	456.16	0.0178762	0.0881991	0.00825349	0.260556
MCU	765.694	-0.335693	0.342827	0.0082466	0.260556
C3orf14	737.427	-0.0298783	0.092996	0.00828139	0.260583
LGALS7	68.2355	0.00703566	0.0861025	0.00827213	0.260583
LINC00482	115.748	-0.0390206	0.0981662	0.00829417	0.260583
WBSCR27	379.77	-0.0254864	0.0908991	0.00836547	0.262403
IKZF3	936.731	0.0227739	0.0899025	0.00840395	0.26319
ERICH1	1464.67	0.0445565	0.102258	0.00842681	0.263485
ASCL2	83.1259	-0.0149033	0.0874435	0.00846108	0.263634
DCDC5	324.68	-0.00348377	0.0857514	0.00848313	0.263634
KIN	1455.78	0.281295	0.590784	0.00845542	0.263634
SLAMF7	1469.53	0.016027	0.0877227	0.00848527	0.263634
UBA2	8830.33	0.0620216	0.119348	0.00863266	0.26779
KLRK1	10.9374	0.0166996	0.0879673	0.00867692	0.268315
PLCD3	1253.18	-0.0374341	0.0970262	0.00866999	0.268315
FAM110C	436.444	-0.0159707	0.087598	0.00869371	0.268411
LINGO2	43.9388	0.00223166	0.0857569	0.00874902	0.269695
FAM213A	3142.58	-0.0444376	0.102123	0.00883493	0.271891
GPI	22438.4	0.0481631	0.105159	0.00884795	0.271891
FEM1C	2261.67	-0.0780027	0.140535	0.00887205	0.272168
TH	24.5993	-0.00655095	0.0860238	0.00888469	0.272168
YBEY	506.987	-0.0974164	0.183043	0.00891714	0.272737
MCTP2	1596.87	0.0185616	0.0884331	0.00896017	0.273313
TPTE2P6	20.1282	-0.0378156	0.0975048	0.00896383	0.273313
IL20RA	750.904	0.00491019	0.0859028	0.00899261	0.27376
PSG9	120.601	0.00428742	0.0858671	0.00900638	0.27376
ERBB4	30076.5	-0.00133628	0.0857208	0.00904684	0.274565
CDH24	1113.15	-0.0359864	0.0961116	0.00913942	0.276947
HOXB6	775.338	-0.0213136	0.0894165	0.00915615	0.277026
LHX9	71.1548	-0.0101967	0.0865193	0.00923879	0.279097
GYG2	525.743	-0.0217068	0.0894605	0.00932358	0.280794
KNDC1	1122.52	-0.0128701	0.0869539	0.00931102	0.280794
PIK3R1	57080.3	-0.0294471	0.0925523	0.00936657	0.281491
WARS	9826.83	0.025541	0.0909324	0.00937538	0.281491
ASB5	17.1401	-0.0106288	0.0866473	0.00948601	0.284115
DHDH	68.9171	-0.0298922	0.0928447	0.00950621	0.284115
KDM2B	4346.19	0.274127	0.342279	0.00949573	0.284115
CACNG1	54.7232	-0.00769229	0.0861668	0.00954745	0.284699
GRIN2B	83.5965	0.0060124	0.0859624	0.00955474	0.284699
FAM201A	72.6488	-0.0088512	0.0862351	0.00968679	0.287775
POLE4	672.147	-0.098239	0.180951	0.00968728	0.287775
CEBPG	840.635	0.0609041	0.117896	0.00973934	0.288885
ATP13A5	830.79	-0.00192478	0.0857515	0.00986031	0.291242
C16orf89	79.2868	0.0131262	0.0871	0.00986901	0.291242
FGF10	301.584	-0.00471083	0.0858555	0.00993695	0.291242
FOXO3B	828.844	0.0422113	0.100375	0.00986252	0.291242
MIR612	4479.13	-0.027439	0.0916815	0.00993757	0.291242
ONECUT2	443.496	-0.00775671	0.0861617	0.00988277	0.291242
PSD3	3392.27	-0.0452391	0.102572	0.00995971	0.291242
SHISA6	95.2918	-0.0142353	0.0873397	0.00996712	0.291242
SLC30A8	508.245	-0.00320206	0.0857934	0.00991903	0.291242
TRIM17	479.883	0.0134809	0.0871912	0.0099363	0.291242
RIMS1	1241.47	-0.00756523	0.0861204	0.0100119	0.291682
SLC17A9	1968.74	0.0203364	0.088861	0.0100092	0.291682
MLXIP	13222.4	0.0577344	0.113842	0.0100382	0.291734
SERPINA11	1357.61	-0.00406908	0.0858445	0.0100434	0.291734
PCDHB17	66.8671	0.0230949	0.0899894	0.0100849	0.292508
KLF5	2919.98	0.0179845	0.0882679	0.0101017	0.292561
C17orf51	93.6989	0.0325589	0.0942157	0.0102097	0.295255
FAM228A	30.3132	-0.0187787	0.0884103	0.0102561	0.296161
APEX1	7104.64	-0.0740365	0.135138	0.0102888	0.296666
DIRAS2	24.3403	-0.00549943	0.0859666	0.0103038	0.296666
C5orf60	32.6946	-0.0123265	0.0868489	0.0103358	0.296716
KBTBD11	59.2001	0.0224397	0.0896533	0.0103287	0.296716
PAX9	258.074	-0.00724945	0.0860792	0.0103551	0.296835
C5AR1	1751.5	-0.0365459	0.0963607	0.0104998	0.299427
CCNE1	4256.36	0.0252881	0.0908073	0.0105161	0.299427
GGT1	11515.8	-0.0250682	0.0906081	0.0105117	0.299427
KLRB1	143.223	0.0180036	0.0882306	0.0105217	0.299427
SNORD113-2	14.4496	-0.0109987	0.08661	0.0104795	0.299427
GPR27	161.54	-0.0171828	0.0880012	0.0105922	0.300183
HIST1H3G	1493.45	0.0162246	0.0877977	0.0105815	0.300183
RAD21L1	22.9726	0.00940442	0.0863775	0.0105942	0.300183
DOK7	406.301	-0.00428154	0.0857966	0.0106258	0.300242
UCN2	28.1062	-0.0180359	0.0883061	0.0106268	0.300242
CPEB2	2746.05	-0.0280752	0.0917967	0.0107027	0.301451
ISG20	1388.04	0.0299538	0.0929544	0.0107157	0.301451
MIPOL1	1061.59	-0.0276226	0.0915617	0.0106886	0.301451
KCNC3	3165.26	-0.0255151	0.0909485	0.0108802	0.303903
MIR4518	4.02781	0.0142756	0.0873379	0.010821	0.303903
PCK1	11767.7	-0.0200027	0.0889341	0.0108572	0.303903
SMIM14	1857.62	-0.0245747	0.0903439	0.0108385	0.303903
VIPR1	719.678	-0.0323845	0.0940942	0.0108686	0.303903
EHF	3728.54	0.0272336	0.0917241	0.0109037	0.304125
TBC1D32	2485.61	0.0384535	0.0978069	0.0109982	0.306328
FAM65A	8414.95	-0.0829259	0.147655	0.0110573	0.307538
C17orf99	4.2179	0.0168417	0.0879898	0.0111544	0.309799
ABCC6	2589.28	-0.0262378	0.0912299	0.0112687	0.310341
IFNG	36.0618	0.0136295	0.0871791	0.0112048	0.310341
LOC101927673	23.9233	-0.027909	0.0920218	0.0112666	0.310341
SH3BGRL	2520.29	-0.0810579	0.145966	0.0112329	0.310341
SIPA1L3	22439.5	0.0519573	0.108317	0.0112254	0.310341
XCR1	76.4301	0.0141165	0.0872903	0.0112648	0.310341
GPR143	138.243	-0.0158082	0.0876533	0.0113491	0.312115
COL4A5	2985.6	-0.0195793	0.0887385	0.011402	0.313134
EFCAB4A	2954.98	-0.0521607	0.108467	0.011496	0.31509
SEPHS1	4386.3	0.0401697	0.0989475	0.0115054	0.31509
C5orf56	280.088	0.0551556	0.111076	0.0115352	0.315468
ARHGEF26	2853.69	-0.022055	0.0894424	0.0115772	0.316174
ACSL6	324.604	-0.0191834	0.0886382	0.0116233	0.316993
TRIM43	140.661	0.00217095	0.0857591	0.0116584	0.31751
CC2D2A	1302.33	-0.149849	0.384926	0.0117515	0.319602
SLC25A21	46.721	-0.00923683	0.0863304	0.0117763	0.319834
APOL2	3341.17	0.0424311	0.100261	0.0119205	0.322154
ICK	2559.78	-0.0904915	0.161813	0.0119448	0.322154
LINC00862	54.584	-0.0313725	0.0935416	0.0119477	0.322154
LOC101059957	1940.58	-0.00403543	0.085849	0.0119523	0.322154
MRO	66.8933	-0.026438	0.091373	0.0119386	0.322154
PRKD2	7113.34	0.0487031	0.105362	0.0119602	0.322154
TTC6	2129.97	-0.00393887	0.0858443	0.0120418	0.323907
CILP2	661.065	-0.0294382	0.0925772	0.0121322	0.325893
AJAP1	96.2338	-0.0280907	0.0919162	0.0123927	0.325947
CLEC6A	21.891	0.0112464	0.0866759	0.0123251	0.325947
FBXO40	3.41705	0.00656512	0.0860724	0.0123642	0.325947
FOLR1	2085.89	0.0106015	0.0866312	0.0121697	0.325947
ITGB7	1050.26	0.0360184	0.0962498	0.0123505	0.325947
LMOD3	37.7826	-0.0150101	0.0875227	0.0123734	0.325947
MROH2A	63.3912	0.0100831	0.0864949	0.0123998	0.325947
NECAB1	329.211	0.00721729	0.086121	0.0123712	0.325947
NPFFR2	57.0952	0.00636381	0.0860314	0.012207	0.325947
PLIN1	396.038	-0.0270131	0.0915324	0.0122511	0.325947
POU6F2	148.167	0.00454586	0.0858549	0.0123395	0.325947
SOCS1	283.525	0.0270147	0.0915458	0.0122762	0.325947
TAP1	6709.65	0.024831	0.0905693	0.0121897	0.325947
TRIM54	25.5474	-0.0146975	0.0874712	0.0121538	0.325947
TSC22D1	5570.65	-0.103956	0.188792	0.0122291	0.325947
TSPAN32	123.812	0.0360167	0.0962155	0.0123787	0.325947
CBLN2	72.7048	-0.00305164	0.0857475	0.0124942	0.325988
FGB	61092.4	-0.00480449	0.0858862	0.0125155	0.325988
FOXC1	4500.64	0.0128516	0.0870403	0.0125176	0.325988
HAUS5	1109.41	0.0523249	0.108369	0.0124678	0.325988
NMT2	1727.72	0.0286396	0.092329	0.0124901	0.325988
RHBDF1	4075.91	-0.0782527	0.144707	0.0124596	0.325988
ZNF597	477.613	-0.0386923	0.0974991	0.0125	0.325988
ECHDC1	2466.58	0.0216171	0.0893244	0.0125605	0.32647
FAM19A5	480.111	0.0140857	0.0872372	0.0125976	0.32647
NNT-AS1	111.749	0.053121	0.108965	0.0126036	0.32647
PSMC4	3626.31	0.0893459	0.160231	0.0126192	0.32647
UNC5C	2942.14	-0.00394586	0.0858067	0.0125782	0.32647
AK9	810.964	0.0461892	0.103308	0.012718	0.328592
ARL4A	626.406	-0.0388439	0.0979704	0.0127454	0.328867
PARD6A	314.052	-0.0357185	0.0958701	0.0127795	0.329315
CERKL	111.532	-0.00548622	0.0859045	0.0128233	0.329578
SLAMF6	314.723	0.0173643	0.0880458	0.0128143	0.329578
AXL	28372.3	-0.0419959	0.0998591	0.012845	0.329705
PALLD	9354.72	-0.0523251	0.108424	0.0129066	0.330854
RAB11FIP1	7369.97	-0.0325028	0.0941386	0.0129726	0.332111
DENND5B	2383.79	0.0268473	0.0913713	0.0130344	0.333259
CHAC1	278.32	0.026381	0.0912314	0.0131268	0.334751
CRB2	106.711	0.0176872	0.0882172	0.0131112	0.334751
FBXO17	647.846	0.026862	0.0914903	0.0132144	0.336112
IL21R	702.835	0.0161266	0.0876981	0.0132014	0.336112
DNAJC12	637.462	-0.00597161	0.0859731	0.0132478	0.336526
STXBP6	111.731	-0.0164035	0.0878057	0.0132972	0.33728
VPREB3	39.4585	0.014002	0.0872204	0.0133119	0.33728
SNORA76C	255.204	-0.0262551	0.0911784	0.0134035	0.339154
ZNF70	1747.2	0.064522	0.121236	0.0134204	0.339154
LOC101928497	26.838	0.0331067	0.0945389	0.0134741	0.33971
SYTL2	5768.86	-0.0233935	0.0899563	0.013477	0.33971
DOC2A	591.94	-0.00789417	0.0861253	0.0135265	0.340195
FOXO4	1178.87	0.0425215	0.100229	0.0135309	0.340195
ABCC1	6784.18	0.0620815	0.118024	0.0136401	0.342501
MDFIC	1344.3	0.0592091	0.115056	0.0137138	0.343913
TNNC2	88.9903	-0.0204598	0.0890284	0.0138529	0.346959
BATF2	380.885	0.0154437	0.0875506	0.0139168	0.348114
SERPINC1	8507.38	-0.0179869	0.0882005	0.0139651	0.348436
TREML1	65.0927	-0.0328455	0.0942571	0.0139651	0.348436
DNAAF3	140.876	-0.00873254	0.0862652	0.0139938	0.348707
RANBP3L	575.814	-0.0200415	0.0889283	0.0140278	0.349114
CPEB4	4960.45	0.0333742	0.0944359	0.0140918	0.350261
CD3D	338.465	0.0217148	0.0894142	0.0141279	0.350273
FAM120C	1355.13	-0.105513	0.191403	0.0141242	0.350273
CLDN3	4489.48	-0.0180644	0.0881372	0.014214	0.351638
ITPRIPL1	197.055	0.0272864	0.0916392	0.0142188	0.351638
HTR1D	71.9517	0.0106627	0.0866056	0.014377	0.355104
LRAT	81.7017	-0.00847104	0.0862641	0.0144425	0.356273
ALG1L2	47.4616	0.0156591	0.0876266	0.0147431	0.356359
ALX1	13.7108	0.00877541	0.0863491	0.0144894	0.356359
AZGP1P1	73.9454	-0.0141415	0.0872283	0.0147308	0.356359
COL19A1	70.9903	0.00274411	0.0857684	0.0149357	0.356359
ENPP6	32.168	0.0143505	0.0873654	0.0146099	0.356359
FAM155B	314.713	-0.00937431	0.0863652	0.0145995	0.356359
FBL	4878.69	0.0365816	0.0964025	0.0149427	0.356359
GPATCH1	1452.15	0.0561493	0.111971	0.0148177	0.356359
GZMA	499.534	0.0169446	0.0879224	0.0146037	0.356359
HYPM	8.39006	-0.000629512	0.0857281	0.0144879	0.356359
LINC00940	30.6891	-0.00361332	0.0858173	0.014745	0.356359
LIPK	56.0053	-0.00676454	0.0860739	0.0145455	0.356359
MAP3K9	1559.06	0.117154	0.218996	0.0145464	0.356359
MCCC2	4706.72	-0.0366266	0.0962605	0.0147184	0.356359
METTL17	2167.99	-0.0474368	0.104054	0.014818	0.356359
NAT10	4248.53	0.0638825	0.120194	0.0147687	0.356359
NYAP2	50.5318	0.0133149	0.0871263	0.0147304	0.356359
OLAH	95.5049	0.00265478	0.0857566	0.0149542	0.356359
PDE11A	197.148	-0.013294	0.0870547	0.0148074	0.356359
RGS17	46.872	-0.0273431	0.0915847	0.0148602	0.356359
SERPINE2	1494.45	0.0255378	0.0908952	0.0147687	0.356359
SNORD115-5	5.2707	-0.0089584	0.0863373	0.014914	0.356359
SPR	903.047	-0.0267821	0.09124	0.0147531	0.356359
SPRY4	976.709	-0.0401892	0.0985285	0.0148932	0.356359
STAC3	384.395	-0.0493937	0.105736	0.0147557	0.356359
TARSL2	1249.94	0.0659117	0.121594	0.0148329	0.356359
THTPA	915.219	-0.123879	0.238017	0.0145189	0.356359
TP53I11	1780.84	-0.0565129	0.111847	0.0148751	0.356359
FZD10	119.524	0.0203662	0.0890151	0.0149872	0.356461
GUSB	8079.64	-0.0465615	0.103269	0.0150311	0.356461
MST4	2047.21	-0.0216453	0.0893384	0.0150174	0.356461
TANC2	11221.8	-0.0225093	0.0895812	0.0150196	0.356461
VIMP	1378.31	0.0475987	0.104064	0.0151026	0.357294
ZNF146	3290.51	0.0559076	0.111617	0.0150962	0.357294
GZMH	112.789	0.0199604	0.088862	0.0151347	0.357624
STRA8	51.9492	0.00266782	0.0857835	0.0151813	0.357877
ZNF662	425.136	0.0328788	0.0944638	0.0151819	0.357877
MIR5190	130.372	-0.038502	0.0976188	0.0152202	0.35835
EXOSC10	4385.05	0.180073	0.241018	0.0152399	0.358385
RND3	1495.9	0.0247384	0.0904661	0.0153002	0.359373
TAP2	4000.53	0.0278793	0.0918093	0.0153186	0.359374
CPNE5	722.221	0.0168184	0.0878574	0.0153842	0.359773
ENTPD2	719.328	-0.0281835	0.0918823	0.0153646	0.359773
NLGN1	117.813	0.0127219	0.0869875	0.0153906	0.359773
MSR1	3547.53	-0.0512377	0.107102	0.0155604	0.362926
NPAS3	173.268	-0.0264293	0.0912929	0.0155624	0.362926
MIEF1	1612.48	0.110715	0.196841	0.0155918	0.36318
RBM17	5550.7	0.0699377	0.127871	0.0156457	0.364004
FAM135B	52.6431	-0.00926427	0.0863443	0.0156963	0.364748
OR7C1	15.1498	-0.0146443	0.087406	0.0157162	0.364779
CYP2S1	727.004	-0.0219149	0.0893515	0.015737	0.36483
AICDA	4.49775	0.00665815	0.0860764	0.0158075	0.365004
G6PD	5816.15	-0.0311382	0.0932751	0.0157657	0.365004
PRPF38A	1916.88	0.0729771	0.131474	0.0158115	0.365004
ZNF595	3223.76	-0.0293	0.0922519	0.0158188	0.365004
FMO2	3390.96	0.0105455	0.0865548	0.015856	0.36518
JPH3	155.215	0.00613734	0.0859941	0.0158637	0.36518
CKM	380.191	-0.014454	0.0873518	0.0159217	0.365243
GBE1	3233.99	-0.033516	0.0945694	0.0159697	0.365243
LOC101927530	87.6622	0.00502645	0.0859027	0.0159541	0.365243
MAFF	311.374	0.0260877	0.0909649	0.015978	0.365243
NR2E1	5.42895	0.00529032	0.0859439	0.0159224	0.365243
TMEFF1	7.78207	0.0135803	0.0871874	0.0159135	0.365243
FAM117B	835.577	0.0665656	0.122794	0.0160251	0.365895
RBM42	3233.91	0.0806436	0.142473	0.0160591	0.366244
PLAC8	377.57	0.0172141	0.0880399	0.0161436	0.367456
ZNF33A	7687.09	0.0665791	0.123143	0.0161497	0.367456
GTF2H2	1100.89	-0.0162219	0.0876231	0.0162308	0.367767
KPNA5	1071.13	0.0517731	0.107008	0.0162023	0.367767
PAPOLB	35.5277	0.0238782	0.0900984	0.0161935	0.367767
SCN1B	439.901	-0.0340274	0.0949064	0.0162383	0.367767
HSF2	1175.39	0.0402262	0.0987339	0.016292	0.368559
GTPBP1	5114.43	0.0413204	0.0992461	0.016352	0.369327
NCAM1-AS1	4.87947	-0.0064317	0.0860363	0.0163824	0.369327
TCHH	405.174	-0.0241785	0.0903	0.0163639	0.369327
DUSP9	170.592	0.00996953	0.086517	0.016416	0.369627
MED12	9126.37	0.0746804	0.132722	0.0164333	0.369627
SPINT2	13680.8	0.0313045	0.0935024	0.0164807	0.369846
SYT10	33.3428	-0.00582199	0.0859693	0.0164776	0.369846
NRG3	240.463	-0.010592	0.086586	0.0165722	0.370628
PRDM11	590.17	0.0402412	0.0986645	0.0165447	0.370628
SORL1	14499	-0.0348226	0.0954437	0.0165619	0.370628
CYP4F11	1758.66	-0.0136273	0.0871687	0.0166171	0.370845
LGALS2	96.7159	0.0121358	0.0868242	0.0166197	0.370845
TTC24	42.8574	0.0212506	0.0892882	0.0166891	0.371972
SEMA3D	11389.4	0.0115753	0.0867333	0.016719	0.372216
CASC14	2.52164	0.00634748	0.0860503	0.0167428	0.372323
SSTR1	142.398	0.0135401	0.0871649	0.0167693	0.372491
RP1L1	286.134	0.00867062	0.0862559	0.0167938	0.372614
LOC101928524	62.458	0.0421722	0.100003	0.0168845	0.37294
MAG	63.1756	-0.00483503	0.0858985	0.0168609	0.37294
MIR27B	44.1264	-0.0250187	0.0906721	0.0168475	0.37294
ONECUT1	1052.34	-0.00271217	0.0857572	0.016871	0.37294
LOC101927183	22.4115	0.00576919	0.0859782	0.0169276	0.373472
NCAM2	836.671	-0.0145606	0.0873364	0.0169488	0.37352
CD8A	289.557	0.0242169	0.0903442	0.0170506	0.373668
CDH15	107.069	-0.0253137	0.0908172	0.0170316	0.373668
HIST1H3J	1141.57	0.0182439	0.0882226	0.0170218	0.373668
PLEKHH3	2854.74	-0.0783136	0.137618	0.0170087	0.373668
SLC38A5	827.666	0.0244346	0.0903147	0.0170495	0.373668
AIFM3	334.138	-0.0213589	0.0891837	0.0171766	0.37398
ATP6AP1	12887.4	-0.0332671	0.094136	0.0172173	0.37398
ENTPD8	469.274	-0.00600323	0.0859359	0.0171435	0.37398
HIP1R	3862.15	0.0490723	0.105319	0.0171377	0.37398
IL6	122.536	0.0162351	0.0877215	0.0171029	0.37398
LY75	65.3977	0.0173542	0.0879893	0.0171194	0.37398
POLR1A	5872.61	0.136952	0.259054	0.0172035	0.37398
SLFN13	1613.68	0.0141255	0.0872075	0.017191	0.37398
LOC100287808	28.1668	-0.0248062	0.0904504	0.017302	0.375406
CSNK1E	10266.6	0.032723	0.0940859	0.017431	0.377371
FAM98C	939.582	0.0427968	0.100295	0.0174162	0.377371
FOS	1156.54	-0.0314298	0.0932592	0.017466	0.377711
C1orf64	217.393	-0.00159835	0.0857469	0.0175506	0.378292
ISLR	3902.4	-0.0303323	0.0930157	0.0175229	0.378292
SLC44A4	2238.73	-0.0024772	0.0857426	0.0175502	0.378292
ALDH4A1	2931.95	-0.0284362	0.0920872	0.0176547	0.379293
IGF2BP1	69.0789	0.0109796	0.086655	0.017655	0.379293
SPRR1A	53.3661	-0.0120823	0.0868778	0.0176185	0.379293
NDUFC2	622.401	-0.0285333	0.0919735	0.017678	0.379371
DGUOK-AS1	15.8354	-0.0274702	0.0916994	0.0178128	0.381208
DLGAP2	48.1607	0.0116552	0.0867507	0.0178268	0.381208
IL12A	45.7765	0.0152948	0.0875815	0.0178412	0.381208
KLHL34	51.5968	0.00662102	0.0860409	0.0178086	0.381208
FER1L6	28.4218	-0.0152571	0.0874105	0.0179777	0.38329
SCRT2	13.2946	-0.000303532	0.0857257	0.017973	0.38329
C1QTNF8	13.6283	-0.000353257	0.0857256	0.0180255	0.38379
RPS6KA6	602.355	-0.0113098	0.0865703	0.0180518	0.38379
ZNF565	754.513	0.0387556	0.0977337	0.0180598	0.38379
CDK5RAP3	6266.17	0.0989758	0.171959	0.0181378	0.385031
OLR1	732.369	-0.0233095	0.0898949	0.0181605	0.385096
ABCD2	243.554	0.0146452	0.0873436	0.0182443	0.386118
CD7	267.538	0.0207933	0.0890932	0.018248	0.386118
GABRD	290.399	-0.0146595	0.0873332	0.0183711	0.386852
PHF21B	138.079	-0.00563294	0.0859117	0.0183354	0.386852
PTPRT	1692.14	-0.00317349	0.0857631	0.0183812	0.386852
RNPEP	5675.93	-0.0693051	0.125993	0.0183723	0.386852
SCARA3	2037.72	0.0200271	0.0888159	0.0183148	0.386852
RNASE4	753.606	-0.0312105	0.0934569	0.0185654	0.39031
AMD1	5939.42	0.0257701	0.0909358	0.018665	0.390315
ELOVL6	803.598	-0.0335043	0.0942549	0.0186028	0.390315
FGL1	14021.4	-0.00476797	0.0858715	0.018612	0.390315
GBP1P1	388.593	0.0147011	0.087371	0.0186649	0.390315
LINC01342	18.2384	0.0103536	0.0865551	0.0186563	0.390315
OFCC1	108.533	0.00794511	0.0862065	0.0187209	0.390652
SMCO3	23.4542	-0.0115975	0.086795	0.0187102	0.390652
AIM2	493.508	0.0179561	0.0882003	0.0188425	0.390697
ALDH7A1	5438.17	-0.0340488	0.0948474	0.0188976	0.390697
COLCA1	65.1317	-0.0149401	0.0873859	0.019006	0.390697
CYP2A6	10254.3	-0.0127184	0.0869373	0.0189426	0.390697
DCST1	124.169	-0.0217518	0.0894291	0.018866	0.390697
GAB2	3814.83	-0.0294694	0.0925059	0.0190065	0.390697
HIF3A	784.485	0.00931411	0.086358	0.0189881	0.390697
MAP4K1	936.711	0.0361983	0.0959294	0.0189382	0.390697
MIR4656	3.93555	0.00829736	0.0862434	0.0189753	0.390697
MITF	800.739	-0.042204	0.0997395	0.0189875	0.390697
PFDN4	910.658	-0.0600271	0.115169	0.0189679	0.390697
PRKD1	820.588	-0.0417443	0.0996509	0.0190215	0.390697
TC2N	6163.34	-0.0267105	0.0913018	0.0189138	0.390697
THUMPD2	898.065	-0.173711	0.220446	0.018945	0.390697
TMIGD2	28.7208	0.0156414	0.0875853	0.0189555	0.390697
MLLT4-AS1	527.532	0.0167594	0.0878648	0.019068	0.390834
NR0B1	13.5323	-0.00040008	0.0857256	0.0190508	0.390834
RARB	710.616	0.0235535	0.0900684	0.0191198	0.391488
HYAL1	783.511	0.0215863	0.0892662	0.0191433	0.391561
AMFR	8814.69	-0.0286537	0.0920076	0.0191889	0.391676
SULT1C2	225.223	-0.0130629	0.0869938	0.0191776	0.391676
C8orf4	712.474	0.0165833	0.0878279	0.0192346	0.392202
SCN3A	228.293	0.0151851	0.087507	0.0192578	0.392269
NANOG	24.7216	-0.0285757	0.0920843	0.0193213	0.392616
SPATA2L	513.507	-0.0770105	0.136358	0.0193349	0.392616
STC1	770.452	-0.0214409	0.0892123	0.0193088	0.392616
ACAP1	752.057	0.0255342	0.0907521	0.0194253	0.392949
FABP3	498.572	-0.0199694	0.0887901	0.0194714	0.392949
LSR	11172.5	0.0417156	0.0996224	0.0194626	0.392949
MYOG	30.67	-0.00884381	0.0863495	0.0194551	0.392949
POLR2F	1860.36	0.0487092	0.104611	0.019402	0.392949
TM4SF19	7.56687	-0.00672889	0.0860364	0.0194197	0.392949
BCL11B	619.111	0.0286335	0.0921678	0.0196228	0.394489
GPR87	151.436	0.00374758	0.0858231	0.019628	0.394489
PTPLAD2	579.794	-0.030681	0.0931578	0.0195997	0.394489
TRPM6	170.695	0.0194517	0.0886507	0.0195771	0.394489
ID4	735.252	0.0141804	0.0873165	0.0196893	0.394913
PIM3	3346.23	0.0493443	0.104968	0.0196698	0.394913
FSD1	104.519	0.0204152	0.0889419	0.0197639	0.3956
HSD17B12	3728.32	-0.0352739	0.0954307	0.019762	0.3956
FAIM3	353.583	0.0374918	0.0966722	0.0198962	0.397842
APOL1	2943.83	0.0294362	0.0925001	0.0199627	0.398361
CD244	85.5475	0.0273083	0.0915406	0.0199424	0.398361
BTLA	108.633	0.024463	0.0903643	0.0201292	0.401276
ARHGAP44	811.591	0.025506	0.0907676	0.0202114	0.401537
COL7A1	2741.88	-0.0277372	0.0917174	0.0201949	0.401537
FAM222B	4246.19	0.0355312	0.0953946	0.0202445	0.401537
S1PR4	187.749	0.0200689	0.0887858	0.0201753	0.401537
SETMAR	811.456	-0.0791154	0.138783	0.0202277	0.401537
PHTF1	1797.17	0.0625464	0.117248	0.0203136	0.402501
C5orf20	39.0535	0.0195498	0.0886721	0.0203854	0.402703
PSMA5	2385.22	0.0873769	0.154573	0.0203676	0.402703
SASS6	1129.91	0.0516834	0.106773	0.0203651	0.402703
CPN2	1205.36	-0.00601141	0.0859449	0.0204375	0.403328
HSD17B1	229.464	-0.0107435	0.0864978	0.0205054	0.404261
FAM107B	1988.3	0.0242504	0.0901744	0.020542	0.404576
ZFAS1	375.427	-0.0299929	0.0925952	0.020609	0.405489
AKR1D1	1300	-0.00814127	0.0861875	0.0207153	0.405987
CLCC1	3827.79	0.0819737	0.142782	0.020717	0.405987
TBX2	1844.32	-0.0370218	0.0963206	0.0206918	0.405987
UBAC2	2465.51	-0.0821573	0.142624	0.0206926	0.405987
LINC00176	70.7706	-0.0139225	0.087113	0.0208131	0.406094
SESN3	4147.21	-0.0204169	0.088812	0.0207478	0.406094
TCL1A	31.1713	0.0120835	0.086849	0.0207691	0.406094
TEAD1	2598.43	-0.0640741	0.119468	0.0207958	0.406094
USP35	2313.98	-0.0432493	0.100269	0.0208258	0.406094
CYBRD1	3039.13	-0.0448514	0.101662	0.0209096	0.407323
KL	166.037	0.0358252	0.0957808	0.0209906	0.408085
LAMP5	265.6	0.0104709	0.086518	0.0209806	0.408085
MLPH	7133.86	-0.00651935	0.0860315	0.0210319	0.408085
RUNX3	1155.48	0.0311723	0.0932968	0.0210117	0.408085
PPIE	1005.71	0.0470899	0.10342	0.0210769	0.408555
CHAD	259.933	-0.00489939	0.0858804	0.021108	0.408755
TMEM8B	3537.29	-0.0305192	0.0927874	0.0211783	0.409711
ALPI	49.1501	-0.000532904	0.0857266	0.0212299	0.410306
C17orf50	4.41677	-0.00765826	0.0861664	0.0213298	0.410854
CREB3L4	2698.47	-0.0257566	0.0906135	0.021346	0.410854
IER3	2116.46	-0.0200386	0.0886878	0.0213629	0.410854
KIR3DX1	10.3576	0.010074	0.0865088	0.0213474	0.410854
TMEM33	2901.9	-0.145257	0.227008	0.0213137	0.410854
SH3RF2	737.879	-0.0152964	0.0875779	0.0213929	0.411028
FCRL6	195.441	0.0126895	0.0868823	0.0214779	0.411555
MIR196A2	15.357	-0.00483487	0.0858627	0.0214704	0.411555
PPCDC	642.647	0.0697232	0.125415	0.0214832	0.411555
IL24	18.719	-0.00149404	0.0857386	0.0215887	0.413172
ARAP1	12185.7	-0.0985173	0.164563	0.0216894	0.413509
CAMKK2	3277.11	0.0867449	0.149419	0.0216367	0.413509
CFHR5	2245.26	-0.00479819	0.0858846	0.0217116	0.413509
FAM129C	123.721	0.0264084	0.0911124	0.0217073	0.413509
FAM149B1	1605.49	-0.0710154	0.127639	0.0216761	0.413509
FOLR4	5.31078	0.00691614	0.0861132	0.0217662	0.414149
ACRBP	350.317	-0.0297619	0.0924357	0.0220561	0.416436
CBFA2T2	2183.4	0.158731	0.216034	0.0219666	0.416436
EDRF1	3472.88	0.0511892	0.106366	0.0220469	0.416436
GCK	9.15748	-0.00760311	0.0861429	0.0219624	0.416436
MYO1A	113.957	-0.0206004	0.0888991	0.0219941	0.416436
NINJ2	292.253	0.0356898	0.0956814	0.0220333	0.416436
PCDH1	7401.64	-0.0518	0.106864	0.0219128	0.416436
PTGES	369.039	-0.0201087	0.0887734	0.0220513	0.416436
LOC101927911	16.2235	-0.0164974	0.0877663	0.0222349	0.419115
PLEKHM3	1188.05	0.0615668	0.116306	0.0222407	0.419115
CD63	11258.2	-0.0731548	0.128883	0.0223238	0.419212
CDH17	14.7911	0.00997648	0.0864474	0.0222982	0.419212
GPR111	16.4312	0.0109301	0.0866287	0.0222812	0.419212
TDRD3	2621.44	-0.0620712	0.116433	0.0223312	0.419212
PKD2L1	84.3646	-0.0330857	0.0941155	0.022438	0.420814
APBB2	8068.81	-0.0247144	0.0902848	0.0224833	0.421262
BIRC3	2570.28	0.02503	0.0905902	0.0225496	0.42189
CPNE7	2440.75	-0.0151529	0.0874758	0.0225813	0.42189
HMX1	11.4992	-0.00883578	0.0863218	0.0225667	0.42189
CX3CR1	209.097	-0.0185035	0.088281	0.0226748	0.422263
IDO2	57.5154	0.0118895	0.0868119	0.0226535	0.422263
PNMA3	131.957	0.0141538	0.0872957	0.0226966	0.422263
SMYD3	1682.8	-0.0571605	0.11178	0.0226587	0.422263
USP24	13014	0.0867364	0.147859	0.0227088	0.422263
ABCC8	501.751	-0.00339557	0.0858128	0.0229522	0.4224
BZRAP1-AS1	184.601	0.0298097	0.0924245	0.0227928	0.4224
IL17REL	215.379	0.00546798	0.0858965	0.0228253	0.4224
MEIOB	13.3935	0.0120182	0.0868561	0.0228442	0.4224
OBP2B	148.71	-0.00440474	0.0858542	0.022746	0.4224
PLEKHS1	1158.86	-0.00996196	0.0864373	0.0229731	0.4224
PROSER2	581.098	0.0260799	0.0909958	0.0229743	0.4224
RFX8	195.911	-0.0203015	0.088787	0.0229737	0.4224
RTKN2	948.726	0.031163	0.0931744	0.0228784	0.4224
TEP1	8440.47	-0.0443012	0.101118	0.0227804	0.4224
UBE2J2	1771.47	0.13966	0.224947	0.0229626	0.4224
WNT9A	499.827	-0.0343356	0.0949712	0.0228875	0.4224
CNTN4	1570.25	-0.010955	0.0865364	0.0230033	0.422538
PNP	1775.34	-0.0316669	0.093465	0.0230401	0.422752
RARA	24888.3	-0.0163466	0.0876204	0.023058	0.422752
EEF1A2	10902.2	-0.00389391	0.0858264	0.0230844	0.422841
BBC3	252.603	-0.0400727	0.097982	0.0231316	0.423037
FBXL19-AS1	133.928	0.0248965	0.0904174	0.0231382	0.423037
FCHO2	4927.29	-0.043704	0.100367	0.0231845	0.423489
CACNG8	26.7397	-0.0183501	0.0882719	0.0232505	0.424301
FAR2	1584.44	-0.0276328	0.0916587	0.023298	0.424772
LOC389607	167.794	0.0250859	0.0905975	0.0233983	0.425916
PLK5	15.6076	-0.0102905	0.0865138	0.0234291	0.425916
UBA6	8080.03	0.0597126	0.113652	0.0234271	0.425916
ZNF488	22.7856	-0.00847641	0.0862557	0.0234475	0.425916
HEXB	11638.4	-0.040283	0.0982042	0.0234898	0.426289
LOC100288814	17.036	-0.0173073	0.087955	0.0235266	0.426564
CDH13	809.488	-0.0417246	0.099246	0.0236455	0.427659
LOC100996634	145.702	0.0128655	0.0870067	0.0236542	0.427659
SLC39A12	40.3546	0.00740079	0.0861082	0.0236741	0.427659
TIGIT	92.7166	0.0204792	0.0889182	0.0236569	0.427659
EMX1	91.0003	-0.00320451	0.085794	0.0237335	0.427944
OR8G5	24.4242	0.00387111	0.0858282	0.0237205	0.427944
IL2RB	760.56	0.0180109	0.0881674	0.023773	0.428264
UTS2R	31.0909	0.0107202	0.0865664	0.0237972	0.428305
ZCCHC11	7117.03	0.0482302	0.104095	0.0238381	0.428648
NKX3-1	230.045	-0.00995487	0.0863999	0.0239699	0.430624
EMB	1983.25	0.0230945	0.0897277	0.0240993	0.432553
WFDC2	913.665	-0.00366042	0.0857559	0.0241221	0.432567
SEL1L	8080.6	0.0408678	0.0986045	0.0241467	0.432614
MS4A7	1710.79	-0.0656877	0.120421	0.0241787	0.432793
SULT4A1	144.699	0.00377529	0.0857844	0.0242676	0.433988
KCNJ16	66.6274	0.00378569	0.0858066	0.0243261	0.434243
PAPSS2	3233.08	-0.0212346	0.0891664	0.0243139	0.434243
GDNF	26.1544	-0.0153874	0.0874588	0.0243847	0.434499
SPP1	16757.1	-0.025059	0.0905746	0.0243793	0.434499
TBC1D8B	1638.36	-0.0546395	0.10948	0.02442	0.434734
CYP4Z1	777.68	-0.00827505	0.0862087	0.0245107	0.435632
FADS2	10500.5	0.0295073	0.0922916	0.0245672	0.435632
IL31RA	64.5949	0.0153119	0.0874578	0.0245973	0.435632
SPEN	23248.8	0.149743	0.202943	0.0245152	0.435632
SYNE2	53113.4	0.0513346	0.106559	0.0246258	0.435632
TRAF3	1876.58	0.0563684	0.110951	0.0246163	0.435632
TSHZ3	1362.44	-0.0416554	0.0991256	0.0245379	0.435632
LY6H	15.5667	-0.0102538	0.0864948	0.0246657	0.435946
PCBD1	1245.32	-0.0449841	0.101507	0.0247192	0.436498
TBX22	14.955	-0.000560468	0.0857247	0.0247565	0.436764
SARS2	1059.61	0.0474143	0.10347	0.0248025	0.437183
MIR4285	7.81395	0.0176916	0.0881342	0.0249265	0.437797
PLEC	102450	-0.0651976	0.119502	0.0248965	0.437797
SLC22A17	1203.19	-0.0290721	0.0919479	0.0249247	0.437797
SLC22A2	3.61051	0.0073566	0.0861664	0.0248942	0.437797
PLEKHA6	6160.02	-0.0320724	0.0936888	0.0249691	0.438153
ANKRD27	4298.76	0.031399	0.0933724	0.0251078	0.438628
CDC40	2075	0.0406224	0.0985947	0.0250942	0.438628
FAM117A	563.364	0.0433968	0.10044	0.0250369	0.438628
FFAR2	104.591	-0.0099891	0.086425	0.0250745	0.438628
GNAS	262404	-0.0711118	0.125845	0.0250465	0.438628
EDA2R	91.6074	-0.0377264	0.0965903	0.0251702	0.438867
LCK	673.875	0.0228883	0.0897481	0.0251639	0.438867
NLRP14	105.96	0.0117112	0.0867741	0.025211	0.438867
ZNF549	723.192	-0.0500785	0.105002	0.0252007	0.438867
KLHL14	41.7361	0.0188581	0.0884414	0.025273	0.439558
SEC61A2	1071.71	0.0385593	0.0972319	0.0253475	0.440463
C20orf202	6.66686	0.022381	0.0895777	0.0254183	0.441303
ACHE	209.855	0.0215931	0.0892912	0.0255548	0.441332
C19orf26	254.475	-0.0133214	0.0868886	0.0255106	0.441332
CD96	797.843	0.0230665	0.0898247	0.0254706	0.441332
LOC389906	394.63	0.0275738	0.0915609	0.0255282	0.441332
SLC23A1	416.301	0.0157809	0.0875846	0.0254499	0.441332
TPSG1	49.2279	-0.00410517	0.0858408	0.0255447	0.441332
KAZALD1	447.242	-0.0198389	0.0886526	0.0255859	0.441474
RAB37	168.954	0.0281943	0.0917318	0.025608	0.441474
ACKR3	991.098	-0.020876	0.0889177	0.0256347	0.441547
RFX4	5.46215	-0.0136347	0.0871248	0.0256755	0.441862
KDM2A	13410.7	0.0608937	0.114197	0.0257256	0.442336
MS4A14	468.438	-0.0405001	0.0983782	0.0258064	0.443338
ITM2A	517.873	0.0277807	0.0916603	0.0258729	0.443703
SPIB	438.929	0.00924724	0.0863008	0.0258509	0.443703
ZNF131	2352.25	0.0723248	0.127709	0.0259062	0.443886
IL12RB2	1449.67	0.0100978	0.0865065	0.0259455	0.444101
PRKCB	1275.77	0.0224461	0.0894934	0.0259865	0.444101
SELENBP1	4131.37	-0.0188685	0.0882503	0.0259796	0.444101
SETD7	3590.62	-0.0825935	0.139764	0.026013	0.444166
BCAN	144.037	-0.00424266	0.0858114	0.0260516	0.444439
EIF3K	5715.77	0.0496881	0.104966	0.0261903	0.444489
GPLD1	560.328	0.0221291	0.0894817	0.026115	0.444489
LOC100653133	48.3911	-0.0302542	0.0927388	0.0261217	0.444489
RGL3	1964.51	-0.0166726	0.0877178	0.0261784	0.444489
SFXN3	1478.32	-0.0374864	0.0962068	0.0261729	0.444489
WDR72	581.009	-0.00555603	0.085927	0.0261574	0.444489
FAF1	3693.6	0.0648582	0.119268	0.0262464	0.445056
SIRPG	169.406	0.0186267	0.0883733	0.0262723	0.44511
RALGAPA1	9163.71	-0.0627614	0.116226	0.0263237	0.445322
RUNX2	1470.7	-0.0299655	0.092484	0.0263301	0.445322
LDHC	46.6261	-0.012753	0.086939	0.0263812	0.445418
SOX9	8694.54	0.0140107	0.0871824	0.0263624	0.445418
MYOM3	118.478	-0.0242154	0.0901508	0.026491	0.446887
LAMP3	1051.47	0.0148834	0.087425	0.0265983	0.447545
MIR5691	32.9073	-0.00485859	0.0859034	0.0265981	0.447545
TRAF5	2809.03	-0.0612632	0.115615	0.0265706	0.447545
MYO15A	349.03	-0.0156147	0.0874068	0.0266373	0.447816
FRMPD1	133.587	-0.0187736	0.0883766	0.0266969	0.448434
GLI3	4529.38	-0.017854	0.0880298	0.0267391	0.448759
DUSP1	1522.84	-0.0177051	0.0879272	0.0267994	0.448934
FOXI1	191.182	0.0109577	0.0866451	0.0268409	0.448934
LOC101927401	153.238	-0.0114057	0.0867002	0.0268259	0.448934
MIR1183	8.03164	0.016154	0.0877411	0.0267817	0.448934
FBP1	4160.2	-0.0137315	0.0870787	0.026871	0.449005
SLC35E2	812.089	0.0294268	0.0923376	0.0268909	0.449005
DENND1B	5842.96	-0.023556	0.0898381	0.0270238	0.449219
ECD	2556.5	-0.0821437	0.13824	0.0271501	0.449219
EIF4EBP2	4179.53	-0.0661843	0.120311	0.0271503	0.449219
EPN3	2745.89	-0.00940158	0.086342	0.0271783	0.449219
FAM65B	701.436	0.0235654	0.0899068	0.0271412	0.449219
GOLIM4	5476.46	0.0442625	0.10079	0.0271534	0.449219
HSPB7	134.339	-0.0153715	0.08748	0.0271015	0.449219
LIN37	735.813	0.0417085	0.0990151	0.0271609	0.449219
ROCK1P1	244.888	-0.0414688	0.099145	0.0269913	0.449219
SCARA5	241.213	0.00532641	0.0858892	0.0271601	0.449219
SIKE1	1191.8	0.0436604	0.100381	0.0270883	0.449219
TFAP2C	2722.24	-0.0221328	0.0894967	0.02717	0.449219
NEGR1	298.234	-0.00839499	0.0862184	0.0272741	0.449291
OGT	21591.8	0.0376328	0.0965649	0.0272644	0.449291
PPT1	3083.73	-0.0576794	0.111948	0.0272495	0.449291
ZNF716	130.209	0.000911397	0.0857297	0.0272494	0.449291
CDK6	10502.2	0.0171806	0.087922	0.0273106	0.449515
NGDN	827.519	-0.0768313	0.132917	0.0273425	0.449662
TWSG1	932.951	-0.0387334	0.0972999	0.0273675	0.449698
C4orf51	33.1184	0.00374316	0.0858264	0.0274332	0.449717
CRYBB1	32.0933	-0.0306569	0.0929787	0.0274227	0.449717
LGI3	25.8681	-0.00798394	0.0861807	0.0274374	0.449717
LMO3	534.15	-0.0020711	0.085711	0.027494	0.450268
BHLHA15	671.869	0.0185331	0.0884306	0.0275721	0.451171
ZDBF2	1339.56	0.0200819	0.0887292	0.0276172	0.451534
CDKAL1	3021.2	0.0654471	0.119659	0.0276468	0.451641
LOC145837	51.5061	-0.00377524	0.0858284	0.027694	0.452036
NDUFA4L2	197.731	-0.0309737	0.0931049	0.0277353	0.452047
VNN3	138.06	0.0140471	0.0872297	0.0277407	0.452047
OSBPL5	2777.56	-0.0400114	0.0977605	0.027792	0.452507
MIR149	4.35062	-0.00426586	0.0858451	0.0278523	0.453114
ARIH1	5504.26	0.0934236	0.152049	0.0281553	0.453591
ATP5L2	170.266	0.0574671	0.111754	0.0279723	0.453591
C10orf82	167.165	-0.00217513	0.0857393	0.0281809	0.453591
C12orf65	291.415	0.0410277	0.0988123	0.0282236	0.453591
CHD2	13709.6	0.113587	0.177734	0.0281747	0.453591
GABRG1	4.45388	0.00611766	0.086006	0.0279946	0.453591
GNGT1	7.6012	0.0038286	0.0858448	0.0280494	0.453591
LY86	288.578	-0.0337331	0.0942673	0.0281581	0.453591
MC1R	634.212	-0.0436186	0.100305	0.0282263	0.453591
NARS2	2115.34	-0.0146939	0.0872136	0.0280349	0.453591
NBR2	250.366	0.0636014	0.117404	0.0282282	0.453591
PROSER2-AS1	4.04644	0.0127904	0.0869943	0.028077	0.453591
RASAL1	654.127	0.00592579	0.0859401	0.0280531	0.453591
REPS2	2189.65	-0.0208536	0.0889029	0.0280006	0.453591
SLC39A2	29.2631	-0.0191091	0.0884951	0.0280589	0.453591
PLEKHG7	31.8983	0.00615052	0.0859839	0.0283218	0.454352
ZNF248	2957.89	0.0249489	0.0902887	0.0283104	0.454352
CAPSL	19.9405	-0.00467084	0.085872	0.0283902	0.455077
SLITRK4	282.283	-0.0123207	0.0867772	0.028426	0.45528
ANKRD1	105.092	0.00804589	0.0861675	0.0285237	0.455758
FCHO1	1006.17	0.029986	0.0924048	0.0285255	0.455758
KCNK2	615.139	-0.00737632	0.0860615	0.0284798	0.455758
PCOLCE2	309.219	-0.0101936	0.0864782	0.0285826	0.456298
DNASE2B	43.3972	-0.0102748	0.0864493	0.0287849	0.45841
SPOCK2	574.749	0.0311641	0.0932035	0.0287392	0.45841
TM7SF2	2147.13	-0.0209524	0.0888955	0.0287744	0.45841
BTN3A1	3928.92	0.0324671	0.0937334	0.0289492	0.459108
CCL24	9.85007	0.005314	0.0859168	0.0290157	0.459108
DTWD2	415.964	-0.0396089	0.0975492	0.0289372	0.459108
HAND2-AS1	48.1516	-0.0144265	0.0872779	0.0289919	0.459108
LOC100287072	46.4622	0.0219444	0.0893022	0.0289924	0.459108
MIR23B	42.0367	-0.0207619	0.0890451	0.0290156	0.459108
SCFD2	1716.9	0.0646019	0.118318	0.0288966	0.459108
WDR62	3380.44	0.0183408	0.0882427	0.0288867	0.459108
GPR162	410.891	-0.0172267	0.0878418	0.029116	0.460323
GRTP1	874.209	-0.0321729	0.0935305	0.0292028	0.461324
PLCB4	3152.22	0.0159134	0.0875589	0.029277	0.462125
LILRA3	214.41	0.0099537	0.0864092	0.0293139	0.462336
ITPK1	4824.24	-0.0130005	0.0868818	0.0293831	0.463055
BEND3	668.336	0.0218737	0.0893292	0.0294605	0.46316
EFTUD1P1	80.1742	0.0233802	0.0896989	0.029427	0.46316
KNG1	13378.3	-0.00982059	0.0864736	0.0294514	0.46316
LOC643339	40.5269	-0.0255027	0.0907196	0.0295983	0.464953
ADH1C	7546.92	-0.0168193	0.0878603	0.029776	0.465591
AKIRIN1	2706.53	0.0394885	0.097755	0.0297681	0.465591
FKBP11	1334.36	0.0303441	0.0926472	0.0297301	0.465591
GPR174	306.674	0.018143	0.0881821	0.0298075	0.465591
MMP7	14288.6	0.00803713	0.0862046	0.0297168	0.465591
RAB33A	47.2305	0.0263207	0.090839	0.0298253	0.465591
RTN4RL1	910.194	-0.0121336	0.086778	0.0298286	0.465591
SMOC2	2103.75	-0.01979	0.0886309	0.0296836	0.465591
DNAJC11	2605.18	0.0961919	0.161382	0.0298789	0.465666
GRM3	4.75286	0.00601615	0.0859824	0.0298808	0.465666
SYNPO2L	119.6	-0.0177656	0.0881572	0.0299105	0.46576
CCDC155	5.95281	0.00293109	0.0857835	0.030057	0.466322
CDK19	1755.78	0.0352161	0.0952296	0.0300653	0.466322
GRM8	131.392	-0.0145129	0.0872152	0.0300308	0.466322
MTMR12	6525.01	0.0364856	0.0959723	0.0300416	0.466322
ZNF671	444.658	0.028308	0.0917727	0.0300444	0.466322
KIAA1211	1441.94	0.011046	0.0865224	0.0301494	0.466724
LRRC47	1954.2	0.0960637	0.156559	0.0301626	0.466724
MEI1	442.829	0.0153863	0.0874409	0.0301284	0.466724
MIR493	8.42899	0.00930872	0.0863438	0.0302225	0.467272
SNX12	1535.34	0.0732334	0.128133	0.030269	0.467272
TIMP4	36.8333	-0.0204501	0.0888688	0.0302694	0.467272
CYP2C18	1678.5	-0.00515133	0.0858444	0.0302949	0.467299
MYPN	118.61	-0.00768566	0.0861096	0.030483	0.469462
PVRIG	379.596	0.0214619	0.0891786	0.030481	0.469462
LOC100131530	123.028	0.0163076	0.0877425	0.0306417	0.470798
MASTL	3053.57	0.0343883	0.0947627	0.0306195	0.470798
OR2D2	14.4396	0.0118792	0.0867523	0.0306112	0.470798
CALCA	27.5248	0.0030391	0.0857841	0.0307012	0.470903
DDN	48.8937	-0.0232491	0.0898395	0.0307143	0.470903
EDIL3	2473.09	-0.00894599	0.0862778	0.0307204	0.470903
ZIC4	5.05632	0.00854768	0.0862701	0.0307915	0.471624
ACSS1	2375	0.026451	0.0908024	0.0310673	0.473688
APCDD1	1533.23	-0.0182556	0.0881862	0.0310942	0.473688
C17orf47	67.935	-0.0038474	0.0858296	0.0309781	0.473688
C1orf226	682.425	-0.0123324	0.086744	0.0310571	0.473688
DACH1	2452.74	-0.00237048	0.085739	0.0310952	0.473688
KCNC1	104.874	-0.0023825	0.0857552	0.0310332	0.473688
PHLDA3	1349.41	-0.0270156	0.0911127	0.0310578	0.473688
CASP16	29.9095	-0.01186	0.0867327	0.0311635	0.474181
CCL19	852.09	0.00420342	0.0858165	0.031359	0.474181
CLDND2	43.4858	0.032024	0.0935846	0.0313065	0.474181
DGCR8	3336.4	0.0644578	0.117834	0.0313439	0.474181
GPR171	128.909	0.0196736	0.0886194	0.0312616	0.474181
LOC727924	25.4195	-0.00181133	0.0857515	0.031369	0.474181
SHISA4	496.801	-0.0240285	0.0900025	0.0312866	0.474181
TIFAB	73.8502	0.018654	0.0883141	0.0313311	0.474181
ZNF853	313.08	0.0171382	0.0879035	0.0312867	0.474181
ZSCAN1	57.5852	-0.00456568	0.0858736	0.0312548	0.474181
KCNMB2	8.73477	-0.00387599	0.0858126	0.0314	0.474285
SIT1	83.0078	0.0156059	0.0875173	0.0314306	0.474383
LOC729173	4.73183	0.00861015	0.0862969	0.0315212	0.475384
ARHGEF18	3858.55	0.0719094	0.125303	0.0316642	0.475754
CNOT6L	3564.16	0.070779	0.12431	0.0317096	0.475754
FAM126B	1593.42	0.0777139	0.127994	0.0316914	0.475754
FAM151A	128.838	0.00507518	0.085887	0.0316562	0.475754
KLF14	23.3023	0.00565887	0.0859278	0.0315924	0.475754
MFSD7	1782.06	-0.0194127	0.0884856	0.0317153	0.475754
RHBDL1	380.658	-0.0145528	0.0871584	0.0315944	0.475754
KLHDC9	400.537	-0.00658299	0.0860273	0.0317879	0.476479
ELOVL3	33.3467	0.013052	0.0869353	0.0318192	0.476584
CADPS	204.733	-0.0163772	0.0876829	0.0319052	0.477144
CIB3	9.12432	-0.00626455	0.0859737	0.0318917	0.477144
CAPN15	4051.51	0.0739636	0.126205	0.0319509	0.477465
GNLY	686.668	0.0130558	0.0869835	0.0320646	0.478441
LRRC39	148.347	-0.0385808	0.0970171	0.032099	0.478441
MAB21L3	27.829	-0.0110802	0.0866167	0.0321078	0.478441
PRODH	689.191	-0.0223772	0.0895182	0.0321321	0.478441
ZNF275	933.253	0.031832	0.0933514	0.0321381	0.478441
TMEM95	13.013	-0.0224513	0.0895078	0.0321702	0.478556
P2RY10	340.494	0.014458	0.087278	0.0322631	0.479574
ASB11	3.14879	-0.0109228	0.0866339	0.0322876	0.479576
SPON2	2455.63	-0.0520002	0.10647	0.0323351	0.479918
IRX3	5014.11	-0.0306488	0.0926547	0.0323869	0.480323
BCAR3	1404.12	0.0199727	0.088613	0.0324615	0.481067
ABCG8	1574.74	-0.00663604	0.0860021	0.032557	0.481376
KIR2DL4	25.1076	0.0112666	0.0866779	0.0325471	0.481376
LOC101929107	19.833	0.01326	0.0870226	0.0325804	0.481376
SIRT2	1747.73	0.0565625	0.110215	0.0325321	0.481376
URI1	6012.81	0.0481026	0.103393	0.0326355	0.481828
LCA5L	196	-0.0251965	0.0904043	0.0327245	0.482417
TXNDC11	6659.5	0.0251698	0.0903665	0.032717	0.482417
RINL	453.738	0.0400457	0.0978017	0.032848	0.483874
LTB	533.946	0.0193644	0.0884852	0.0329018	0.484302
PRB2	10.3139	0.00298485	0.0857766	0.0329688	0.484489
SNED1	5420.24	-0.0282442	0.091703	0.0329885	0.484489
SOX8	770.79	0.00852738	0.0862471	0.0329876	0.484489
ZFP82	734.352	0.0325304	0.093732	0.0330181	0.484562
GRIN2D	760.437	0.0129007	0.0868981	0.0330555	0.484748
MIR3616	6.43452	-0.00617605	0.0860042	0.0331176	0.485296
ADCY9	5022.05	-0.0214746	0.0889381	0.0340089	0.485705
ADPGK	1952.68	0.0743905	0.128031	0.0337015	0.485705
ALAS2	32.988	0.0122927	0.0868539	0.033806	0.485705
ARX	29.7726	-0.00712694	0.0860723	0.0339999	0.485705
DLG1	8986.53	-0.0605783	0.113778	0.0338242	0.485705
ESYT1	7145.9	-0.0681797	0.120913	0.0338829	0.485705
FAM46A	1067.37	-0.0211696	0.0889921	0.0336241	0.485705
FGFR3	13587.5	0.0135325	0.0870627	0.0338953	0.485705
GALNTL6	20.0964	-0.00615353	0.0859852	0.033747	0.485705
GBP2	6114.33	0.0212146	0.0890677	0.0334376	0.485705
GTSF1	101.795	0.00902293	0.0862883	0.0340281	0.485705
HINFP	1012.47	0.0440903	0.100499	0.0335024	0.485705
ICAM3	1421.91	0.0245389	0.0901951	0.0339712	0.485705
KB-431C1.4	21.3047	-0.027426	0.0914323	0.0336352	0.485705
LINC00518	22.3963	0.00268042	0.0857774	0.0339608	0.485705
LOC100132215	9.75645	0.0163948	0.0877644	0.0336432	0.485705
LOC101928664	196	-0.0231889	0.0896776	0.0337754	0.485705
LRRN2	1554.37	-0.00962116	0.0863084	0.033391	0.485705
MDK	6071.37	-0.0348558	0.0949363	0.0339224	0.485705
MIR4520A	5.00245	0.0118668	0.086783	0.0333794	0.485705
MMP20	150.034	0.00216601	0.0857595	0.0334158	0.485705
MYOF	20105	-0.0328903	0.0938721	0.0335804	0.485705
NKX6-1	129.002	0.0080334	0.0861515	0.0338057	0.485705
NLRP2	4632.01	0.0057414	0.0859388	0.0335246	0.485705
ORM2	7839.08	0.00367101	0.085819	0.0339293	0.485705
PADI3	161.106	0.00684069	0.0860573	0.0339031	0.485705
PRIMA1	18.0561	-0.0213057	0.0891187	0.034036	0.485705
PTPRG	5858.23	-0.0546572	0.108744	0.0337519	0.485705
QRSL1	1772.01	0.0278552	0.0915521	0.0334691	0.485705
RUNDC3B	209.637	0.0187398	0.0883842	0.0334611	0.485705
SLC16A9	107.751	-0.0129226	0.086892	0.0338201	0.485705
SMAP1	2055.96	0.0652356	0.11828	0.033859	0.485705
SYN2	104.43	0.00610342	0.0859617	0.0333629	0.485705
TKTL1	11.7332	0.0118623	0.0868005	0.033585	0.485705
VWCE	215.608	-0.0214287	0.0890836	0.0335452	0.485705
XKRX	49.8863	-0.025063	0.0904152	0.0338904	0.485705
TOB1	7480.65	-0.016201	0.087524	0.0340965	0.486216
SSPO	1918.14	-0.0231676	0.0895429	0.0342969	0.488718
NTN3	136.579	-0.0112366	0.0865303	0.0344514	0.490346
SCRT1	44.6938	-0.000474932	0.0857267	0.0344611	0.490346
FOXJ1	141.4	-0.00402855	0.0858385	0.0345139	0.490387
TNIK	1925.61	-0.0391962	0.0974341	0.034493	0.490387
CD300LB	32.3414	-0.0256091	0.0906689	0.0345472	0.490505
GATSL3	432.817	-0.041429	0.0985771	0.0346063	0.49099
CXorf49	50.6605	0.00520554	0.0859388	0.0347698	0.492841
ZNF831	402.764	0.016967	0.0878837	0.034787	0.492841
ABHD1	140.375	-0.009465	0.0862899	0.0348359	0.493177
RPS2P32	31.5455	0.019932	0.0887003	0.0348693	0.493295
LOC101927767	106.97	-0.00951212	0.0863387	0.0349092	0.493398
QPCTL	771.944	0.035133	0.0950744	0.034952	0.493398
THOC7	1677.99	-0.0553118	0.109226	0.0349281	0.493398
C1orf159	684.256	0.0506217	0.104906	0.035272	0.493577
CEL	1500.99	-0.0113412	0.0865532	0.0353343	0.493577
CHIA	12.1452	0.00646491	0.0860529	0.0351822	0.493577
CNTNAP3	344.238	-0.0143637	0.0871892	0.0352302	0.493577
DHRS4-AS1	497.587	-0.0262837	0.0906135	0.0353271	0.493577
HR	1423.87	0.0142528	0.087182	0.0350075	0.493577
KCNK5	1102	0.0139819	0.0872049	0.0350471	0.493577
MIR3139	50.0891	0.0290305	0.0920095	0.0350665	0.493577
PAQR6	883.844	-0.0257452	0.0905385	0.0353594	0.493577
PCYT1B	27.0829	-0.010192	0.0864831	0.0352386	0.493577
PENK	46.3847	0.00731023	0.0861304	0.0353446	0.493577
PPIL6	175.076	0.0236684	0.0898888	0.0351631	0.493577
PRRT4	96.0372	-0.00697462	0.0860869	0.0353051	0.493577
PTER	977.112	0.0331072	0.0938865	0.0352026	0.493577
TPTE2P1	27.2363	-0.0287373	0.0918621	0.0351295	0.493577
UQCC2	1196.49	-0.0599447	0.112605	0.0353668	0.493577
DAW1	3.51001	0.0109863	0.0866389	0.0354042	0.493748
ARRB2	3735.39	-0.0650003	0.117013	0.0355044	0.493887
CLEC4E	116.411	0.0167335	0.0877919	0.0355024	0.493887
HIST1H2AM	6862.27	0.0201312	0.0885234	0.0354676	0.493887
HNRNPUL2	103.345	0.0761967	0.129529	0.0355651	0.493887
TMEM255A	229.904	-0.0198732	0.0885324	0.0355323	0.493887
UNC5B	5487.1	-0.0304054	0.0924952	0.0355582	0.493887
ACER2	318.7	-0.0383425	0.0965584	0.0356574	0.494819
AFF3	9226.61	-0.00508135	0.085879	0.0357342	0.495246
CCNB1IP1	1667.26	-0.0313868	0.0931727	0.0358018	0.495246
CD3G	191.535	0.0176491	0.0880028	0.0358143	0.495246
FAM81A	121.435	-0.0182833	0.0882709	0.0357984	0.495246
LOC100289092	39.8215	0.0262042	0.0907547	0.0357924	0.495246
CHST13	92.2586	-0.0101805	0.0864167	0.0358689	0.495304
PIGT	10872.9	-0.0335907	0.093994	0.0358453	0.495304
SDR16C5	289.834	-0.00534002	0.0859153	0.0359769	0.496446
AGRP	5.59938	-0.0158322	0.0876059	0.0361114	0.496561
ALX3	15.0334	0.00565747	0.0859292	0.0363267	0.496561
C19orf40	202.374	0.0315993	0.0932457	0.0363439	0.496561
C3orf27	2.99728	-0.00626692	0.0860354	0.0364378	0.496561
CACNG6	55.2055	-0.0109441	0.086636	0.0362262	0.496561
CACTIN	2390.88	0.100417	0.156092	0.0363384	0.496561
CCDC23	325.453	0.0458694	0.101284	0.0364087	0.496561
FAM171A1	3645.77	0.0158989	0.0876384	0.0361557	0.496561
FDFT1	9947.02	-0.0271865	0.0912153	0.0363057	0.496561
FOXD3	65.5195	-0.0065791	0.0859544	0.0362795	0.496561
GSDMC	1104.52	0.00637851	0.0859933	0.0362764	0.496561
HCN2	434.273	-0.0073633	0.0860873	0.036242	0.496561
KIF1A	2998.5	0.00721005	0.086056	0.036374	0.496561
KLHL41	270.172	-0.0198059	0.0886172	0.0360936	0.496561
MGC32805	16.9622	-0.0114648	0.0867216	0.0364404	0.496561
PAK2	8061.69	-0.0658671	0.118355	0.0364296	0.496561
SCG2	346.118	-0.00975344	0.0864019	0.0360953	0.496561
SNORD112	9.44322	-0.0155349	0.0875527	0.0364179	0.496561
DHRS4	1128.15	-0.037688	0.0962197	0.0365058	0.496763
MT1G	1787.66	0.0135234	0.0870626	0.0364956	0.496763
MAT1A	5640.12	-0.00689869	0.086034	0.0365388	0.496866
SLC52A3	524.125	-0.008774	0.0862315	0.0366462	0.497983
CHD7	14051.4	0.0288147	0.0920034	0.0366962	0.498083
PLAU	3916	-0.0257511	0.0906052	0.0367043	0.498083
ESR2	335.864	0.0181166	0.0881121	0.0367407	0.498168
TNFSF15	116.859	-0.0311102	0.0929647	0.0367613	0.498168
C10orf71	18.6434	-0.00972772	0.0864622	0.0367948	0.498277
LAT	568.585	0.0480322	0.103043	0.0369163	0.498685
NKX2-8	9.01372	-0.00584709	0.0859724	0.0368743	0.498685
PRELID2	322.94	-0.0497743	0.104378	0.0369327	0.498685
TNFRSF9	92.8077	0.0184954	0.0882164	0.0369519	0.498685
TTC8	1517.39	-0.0230787	0.0894735	0.0368944	0.498685
HIST1H2BI	2831.18	0.0166258	0.0877077	0.0370303	0.499401
MOGAT2	920.477	-0.00135211	0.0857352	0.037112	0.500159
ENDOU	24.9245	-0.017213	0.0878799	0.0371737	0.500647
SSBP3	3181.6	0.0312941	0.0929048	0.037235	0.500786
ZNF703	9695.98	-0.0054604	0.0858633	0.0372144	0.500786
ELTD1	1623.33	-0.0467291	0.10201	0.0373788	0.502031
HMGN4	533.998	0.0590931	0.11239	0.0373647	0.502031
WHAMMP3	127.4	-0.0342953	0.094356	0.0374172	0.502203
ATP8B3	410.18	-0.0321641	0.0933368	0.0375274	0.503251
TSPAN1	1354.43	-0.00582408	0.0859564	0.0375465	0.503251
ALKBH6	549.561	0.034079	0.0943794	0.0376575	0.504354
DERL3	1703.46	0.0132091	0.0869781	0.0376801	0.504354
PRPF38B	2313.42	0.0844853	0.138631	0.0377313	0.504694
DDIT3	993.559	-0.015775	0.0874461	0.037821	0.504863
SPINK8	162.03	-0.0062297	0.086008	0.0377709	0.504863
TRAF2	3035.54	0.0329038	0.0938695	0.0378137	0.504863
DHTKD1	8327.24	0.0253406	0.0905432	0.0378867	0.505053
ILDR2	97.3986	-0.0119811	0.0867371	0.0378769	0.505053
TCF21	213.765	0.0132682	0.0870277	0.0379288	0.505272
CD36	3316.52	-0.0155688	0.0874121	0.0379859	0.505516
STARD7	4290.84	0.0744921	0.127994	0.0379988	0.505516
UROC1	1052.11	-0.011734	0.0867508	0.0380244	0.505516
HSD17B7P2	517.735	0.0221652	0.0893162	0.0381198	0.506099
SEMA6C	1003.93	-0.0465905	0.101654	0.0381168	0.506099
ARPP21	28.9134	-0.0117795	0.0867752	0.0382969	0.506396
DAB1	115.312	0.00982257	0.0863966	0.0382623	0.506396
HSF4	2065.52	-0.0349714	0.0948204	0.0382933	0.506396
LARP4B	7601.94	0.0532639	0.107067	0.0382643	0.506396
PAK4	8208.66	0.0420338	0.0989171	0.0382702	0.506396
SLC16A1	2572.82	0.0175093	0.088016	0.0382855	0.506396
CLRN3	68.404	-0.0133092	0.0870373	0.0383645	0.506799
EDN2	92.8616	-0.0117263	0.0866918	0.038379	0.506799
FIBCD1	234.488	-0.00578484	0.0859473	0.0384613	0.506863
UTP6	3318.38	0.0749526	0.126679	0.038455	0.506863
WNK4	900.234	-0.00678399	0.0859887	0.0384383	0.506863
ZYG11A	1156.18	0.0321048	0.093398	0.0384919	0.506926
ALG1L9P	116.021	-0.0263357	0.090617	0.0386316	0.507359
CDK11B	2204.91	0.0532147	0.107113	0.0387283	0.507359
DCDC2	658.005	-0.00542956	0.0858896	0.0387481	0.507359
GDPD4	12.819	-0.00948838	0.0863981	0.0387723	0.507359
LOC401052	173.769	-0.0284321	0.0916973	0.0387024	0.507359
LRRTM1	5.50751	0.00705087	0.086106	0.0387728	0.507359
PARD6B	3045.72	-0.0119543	0.0866836	0.0387339	0.507359
SLC35B2	2764.37	-0.0441908	0.100282	0.0387467	0.507359
TARP	6.93068	0.0127637	0.0869563	0.0386588	0.507359
TMEM184A	2205.32	-0.0143487	0.0870959	0.0387831	0.507359
PAQR7	632.72	0.0431979	0.0997638	0.0388336	0.507681
CCNI2	58.5896	0.0152988	0.0874101	0.0389574	0.508852
KHDC1	25.6861	0.0201105	0.0887183	0.038975	0.508852
SOBP	975.905	0.0276025	0.0914507	0.0390121	0.508997
MAP1LC3B2	113.616	-0.0220958	0.0892602	0.0390745	0.509474
CYP2C19	1137.24	-0.0032088	0.0857575	0.0392777	0.510428
MIR4523	138.397	0.0292469	0.0918907	0.0391962	0.510428
SEMA3E	305.813	-0.00930088	0.0863138	0.039256	0.510428
WDR37	2297.22	0.0575478	0.111194	0.0392372	0.510428
ZBTB24	1177.64	0.0284869	0.0917386	0.0392662	0.510428
LRRC52	5.51974	-0.00223358	0.0857654	0.0393285	0.51075
ANKS1B	2976.96	-0.0138519	0.0870878	0.0393842	0.511136
ACTR6	1872.24	-0.0408297	0.0980082	0.0395262	0.511626
LOC101927180	9.96645	-0.0103776	0.0864436	0.0395172	0.511626
LOC101928615	171.796	0.0325583	0.0936305	0.0395083	0.511626
TREM1	218.128	-0.0310392	0.0929657	0.0394916	0.511626
RTN2	706.987	-0.0190718	0.0882917	0.0397023	0.513566
PSAT1	1581.67	0.007665	0.0861046	0.0398152	0.514689
MINPP1	1464.41	-0.0619165	0.114138	0.0398513	0.514816
C21orf67	99.3337	-0.0319449	0.0932001	0.0400677	0.514842
CHRNG	51.1276	-0.0153161	0.0874906	0.0400275	0.514842
CPA5	14.9848	0.0129923	0.0869834	0.0399939	0.514842
KBTBD12	64.7483	0.00208253	0.0857378	0.040015	0.514842
LYZ	6876.86	0.0211753	0.0889563	0.0400685	0.514842
NFATC4	3287.53	-0.0219192	0.089097	0.0399431	0.514842
RLF	4593.08	0.0672207	0.119397	0.040093	0.514842
RXFP1	85.4096	0.0191421	0.0884701	0.0400123	0.514842
SERTAD2	1449.92	0.0458045	0.101421	0.0401418	0.514842
SLC29A3	1204.19	-0.0265403	0.0907563	0.0401291	0.514842
SLC36A1	1293.62	-0.0493035	0.103641	0.0399402	0.514842
C14orf132	155.518	-0.00640277	0.0859358	0.0402079	0.515018
SLC28A3	399.714	0.00947823	0.0863317	0.0402001	0.515018
ATP8B1	6182.77	-0.0292214	0.0918138	0.0402861	0.515139
MIR3687	2373.89	0.0196545	0.0885656	0.0402961	0.515139
P4HA1	6254.93	-0.0318504	0.0931654	0.0402466	0.515139
DACT2	107.266	0.0109718	0.0865846	0.0403965	0.515327
KCTD9	1576.01	0.0336521	0.0941837	0.040442	0.515327
LOC100507377	6.62985	0.00272333	0.0857786	0.0404001	0.515327
LOC728763	34.1185	0.00623718	0.0859842	0.0404141	0.515327
RPP38	610.054	0.0399083	0.0975903	0.0404332	0.515327
SCN8A	1280.76	-0.0241659	0.0900715	0.0405299	0.516112
ADRA2C	289.685	-0.0172241	0.0878828	0.0406476	0.516798
NEK5	146.59	-0.0257993	0.090696	0.0406231	0.516798
SLC13A5	2396.24	0.0108626	0.0866153	0.0406627	0.516798
GRK6	4037.86	0.0666717	0.118815	0.0407165	0.517147
IL15	271.745	0.024307	0.0899727	0.0407942	0.517464
PRRG2	325.746	-0.0297142	0.0920554	0.0407911	0.517464
CLEC5A	314.526	-0.027536	0.0913487	0.0408274	0.517551
CDH10	9.31896	0.00708381	0.0861093	0.0408928	0.518046
CAMK2N2	148.396	-0.00601341	0.0859107	0.0409376	0.518279
MYO3A	453.86	0.00429199	0.0858118	0.0410418	0.519263
LTB4R	1159.26	-0.0378445	0.0960131	0.041109	0.519779
GBP3	3638.2	0.0248309	0.0902776	0.0411742	0.520268
NRD1	12645.4	0.0670943	0.119191	0.0412049	0.520321
KSR1	2798.26	0.0308271	0.0927778	0.0413373	0.521344
PCSK1	476.59	0.00855128	0.0862465	0.041339	0.521344
ABRA	3.98879	-0.00701238	0.086069	0.0414701	0.521992
MLXIPL	4382.56	-0.0111432	0.0865449	0.0414485	0.521992
NAB2	1124.62	-0.0607032	0.112427	0.0414583	0.521992
HIST1H2BM	1953.95	0.0176331	0.0879684	0.041512	0.522184
ZNF730	722.111	0.00993877	0.0863836	0.0415578	0.522426
NR2C2	3376.94	0.112928	0.164078	0.0416033	0.522663
TBC1D24	3078.09	-0.0438108	0.099377	0.0416554	0.522983
ASAH1	14059.3	-0.0190599	0.0883612	0.0417347	0.523644
C19orf47	1434.35	0.0410502	0.0983265	0.0417688	0.523737
ABCG4	42.205	-0.0143873	0.0871294	0.041992	0.525529
CD3E	510.836	0.0176273	0.0879896	0.0419518	0.525529
ITPKC	2004.23	0.0359931	0.0953285	0.0419684	0.525529
BSG	10842.1	-0.04971	0.103989	0.0420556	0.525654
ITGA11	5195.09	-0.0204219	0.0887367	0.0420495	0.525654
LURAP1	140.383	-0.0202119	0.0886812	0.042169	0.526536
SEMA4D	3862.87	0.0372671	0.0959876	0.0421797	0.526536
KCNB2	75.8537	-0.00568544	0.085947	0.0422172	0.526669
AGMO	657.957	-0.020326	0.088804	0.0422733	0.5267
PRICKLE1	1867.54	0.0242084	0.0900651	0.0422591	0.5267
DAD1	2301.68	-0.0477848	0.102683	0.0423173	0.526914
ATF7IP2	1665.07	0.0150537	0.0873659	0.0423796	0.527114
IP6K3	113.967	-0.0124969	0.0868663	0.0424925	0.527114
LOC100506469	148.855	0.0339881	0.0943394	0.0424255	0.527114
MIB2	3032.66	0.0638144	0.115293	0.0424428	0.527114
NPM1	94620.7	-0.0579609	0.110181	0.0424987	0.527114
SORBS2	6654.66	0.010567	0.0865008	0.0425213	0.527114
ZFP30	1627.6	0.0452044	0.100866	0.0424257	0.527114
CHST4	190.526	0.00453503	0.0858279	0.042586	0.52725
LOC644086	31.7052	-0.0309577	0.0927992	0.042576	0.52725
C2orf71	8.64018	0.00629975	0.0860245	0.0427737	0.527909
ITGA2	3159.47	-0.0294177	0.0921669	0.0427462	0.527909
OR6S1	4.79341	0.0019207	0.0857411	0.0427384	0.527909
SGCD	340.443	-0.0241653	0.090079	0.0426933	0.527909
SLC22A23	1004.04	-0.0235007	0.0896945	0.0427593	0.527909
TACSTD2	10686.2	0.00796882	0.0861264	0.0429306	0.529513
TMEM205	1480.99	-0.0375202	0.0957637	0.0429635	0.529586
DMWD	4453.65	0.0421548	0.0989482	0.0430411	0.53021
PXMP4	485.784	0.00962628	0.0863286	0.0431128	0.530761
C9orf3	2481.13	-0.0419125	0.0987761	0.0431723	0.530828
RBBP8	4766.12	-0.022372	0.0893617	0.0431487	0.530828
HOXC9	1199.04	-0.00842252	0.0861691	0.0432576	0.531213
LRRC56	951.456	-0.0138026	0.0870153	0.0432578	0.531213
LOC100130301	13.3501	-0.0103247	0.0864434	0.0434184	0.532852
C3orf67	380.181	-0.0245579	0.0899679	0.0434599	0.533028
GPRIN2	748.774	0.00865317	0.0862757	0.0435141	0.53336
ANXA9	967.823	-0.0103649	0.0864062	0.0437019	0.534134
CDYL	2538.68	0.0573471	0.110047	0.0437949	0.534134
CUBN	687.56	0.0308988	0.0927469	0.043789	0.534134
GNA15	1165.52	0.0157956	0.0874866	0.0437661	0.534134
MAPK10	652.575	-0.0164043	0.0876153	0.0437258	0.534134
MCM8	2112.82	0.0351597	0.0945119	0.0437486	0.534134
OR7E14P	169.338	0.0233418	0.0896622	0.0436896	0.534134
TXK	189.993	0.0202226	0.0886644	0.0437126	0.534134
HSPA4L	1589.88	-0.0142599	0.0870902	0.0438588	0.534582
CAB39L	832.901	-0.0328968	0.0936708	0.0438915	0.534649
EIF3D	6786.79	0.0514352	0.10506	0.0439276	0.534756
MSI1	589.048	0.0154424	0.0874836	0.044082	0.534849
OSGEP	1120.45	-0.0358635	0.0952135	0.044043	0.534849
SRCIN1	2041.49	-0.0222532	0.08925	0.0440104	0.534849
SRSF6	8250.6	-0.0593264	0.111349	0.0439783	0.534849
SUSD5	210.383	0.00986899	0.0863892	0.0440599	0.534849
TMEM251	898.468	-0.0259415	0.0903582	0.0440987	0.534849
ALMS1P	124.256	-0.0164426	0.0875722	0.0442022	0.535238
AP1G2	4617.11	-0.0439655	0.0999846	0.0442397	0.535238
AWAT2	4.11782	-0.00518851	0.0859139	0.0442189	0.535238
ZNF292	8365.86	0.078266	0.129025	0.044229	0.535238
LPIN1	5175.12	0.0260292	0.0907247	0.0443839	0.536322
WSCD2	77.011	-0.00702505	0.0860037	0.0443702	0.536322
PPP1R3C	690.139	-0.00967417	0.0863359	0.0444236	0.536471
PRR15	440.745	-0.00442444	0.0858523	0.0444873	0.536675
THAP8	313.245	0.0482671	0.102953	0.0444952	0.536675
AJUBA	1134.33	-0.0182734	0.0881211	0.0445534	0.536866
FAM129A	4074.4	-0.037925	0.0962426	0.044613	0.536866
HS6ST1	2434.93	-0.0500988	0.104273	0.0446204	0.536866
PPP6R1	7166.2	0.0493751	0.103514	0.044589	0.536866
TBC1D10C	649.472	0.0197648	0.0885116	0.044724	0.537783
CACNA1E	71.0628	0.0220104	0.0892392	0.0449313	0.538678
CCDC69	1010.52	0.0192139	0.0883573	0.0449293	0.538678
CD247	173.133	0.0179556	0.0880927	0.0450693	0.538678
CNGB1	38.1997	0.00867741	0.0862871	0.0450679	0.538678
DZIP1	1382.53	0.0439562	0.0997573	0.0450727	0.538678
GJB2	821.455	-0.0178775	0.0880566	0.0450187	0.538678
LOC100133315	264.575	-0.03398	0.0940885	0.0450125	0.538678
MYO1C	15862.9	-0.0735312	0.123692	0.044981	0.538678
NOS1AP	1211.49	-0.0103038	0.0863941	0.0449084	0.538678
PEX11A	396.972	-0.0318073	0.0930073	0.0448539	0.538678
SDHAP1	3138.3	-0.0424377	0.0990952	0.0451095	0.53879
LSS	4779.04	0.0413933	0.0982997	0.0451801	0.539305
OTUB2	134.943	-0.0249154	0.0901342	0.0452651	0.539992
FLOT2	6170.73	0.0424108	0.0989462	0.0452937	0.540004
AGR3	1949.24	-0.00092016	0.0857144	0.0454309	0.540328
LOC101928891	32.2418	-0.0180142	0.0880092	0.0453662	0.540328
PCNA	5320.38	0.0596791	0.11107	0.0454257	0.540328
PCYT1A	2565.19	-0.0641478	0.11521	0.0454303	0.540328
SULF2	11963.7	-0.0257262	0.0904962	0.0455651	0.541596
GDA	695.592	0.0136952	0.0870856	0.0456745	0.54224
PITPNA-AS1	146.244	-0.0356263	0.0949991	0.0456729	0.54224
ANXA7	4729.35	-0.0698426	0.121148	0.0457382	0.54225
CARD17	43.8717	0.0105858	0.0864987	0.0458521	0.54225
FAM86FP	358.639	-0.0173893	0.0878578	0.0459239	0.54225
NDUFS4	1547.07	-0.0530246	0.105782	0.0459235	0.54225
NXPH1	477.013	-0.000351959	0.0857257	0.0458114	0.54225
PRAME	7655.05	0.0086168	0.0862733	0.0458005	0.54225
RPIA	616.794	0.042514	0.0989929	0.0459018	0.54225
SLC25A47	1786.63	-0.00787535	0.0861225	0.0459132	0.54225
TNFSF18	22.9027	-0.0157357	0.0875339	0.0458541	0.54225
GFAP	9.40349	0.00809702	0.0862003	0.0460327	0.542882
OMP	12.309	-0.0170834	0.0878979	0.0460222	0.542882
CALCB	19.6327	0.00908835	0.0862897	0.0461414	0.543093
CRAT	4850.23	-0.0181682	0.0880037	0.046138	0.543093
GUCY2C	16.3984	-0.00844738	0.0862237	0.0461465	0.543093
NPFFR1	22.6764	0.00731696	0.0860964	0.0461612	0.543093
HSPB1	47375.5	-0.0150116	0.087212	0.046205	0.543283
DNAJB13	41.3609	-0.0100408	0.0864101	0.0462536	0.543417
GPD1	523.401	-0.0183839	0.0881586	0.0462718	0.543417
GALNT10	2576.43	-0.0268553	0.0909123	0.0463366	0.543852
GPR4	390.186	-0.0410662	0.0977373	0.0465514	0.545395
HPR	1593.34	0.00994229	0.0864698	0.0465427	0.545395
MAL	57.2002	0.0126665	0.0868629	0.04651	0.545395
NKAIN3	11.1516	0.00597413	0.0859762	0.0466312	0.545423
TNFAIP1	2010.35	0.0605645	0.112298	0.0465876	0.545423
TREML4	7.04026	-0.0085585	0.0862814	0.046637	0.545423
PREP	2305.98	0.0296243	0.0921472	0.0467214	0.546084
CNGB3	4.23948	0.00361547	0.0858329	0.0467576	0.546182
FUT6	363.121	0.00677419	0.0860069	0.0468513	0.546951
LINC00346	100.549	-0.014889	0.0872601	0.0470418	0.548849
FBXO27	351.187	0.0154356	0.0874459	0.0470916	0.549104
FAM71F1	36.1909	-0.0272209	0.0911955	0.0472622	0.549136
LRRC37A6P	576.752	0.0113303	0.0866201	0.047252	0.549136
MIR583	4.59363	-0.0157764	0.0875284	0.0472035	0.549136
MPZL2	846.56	0.0138531	0.087129	0.0471503	0.549136
PRR27	2607.12	0.000211438	0.0857221	0.0472501	0.549136
RAPGEF3	855.111	-0.0278174	0.0913569	0.0471985	0.549136
GMDS	1698.75	0.0257005	0.090576	0.0473784	0.549221
KLK13	33.4593	0.00582918	0.0859564	0.0473814	0.549221
LIPG	754.519	0.00747724	0.0860622	0.0473156	0.549221
MR1	623.809	-0.0441556	0.0997558	0.0473786	0.549221
GTF2H2C	1039.75	-0.0302535	0.092075	0.0474304	0.549358
SEC63	10310.6	0.0317835	0.0931326	0.0474492	0.549358
CAPN12	766.348	0.00995449	0.0863484	0.0475196	0.549629
ECM1	9319.48	-0.00454189	0.0858232	0.0475285	0.549629
GTF2A1L	2.32376	0.0062834	0.0860318	0.0475637	0.549712
DDX26B	2165.24	0.0247499	0.090134	0.0476301	0.549833
RARRES1	6003.67	0.0057951	0.0859223	0.0476221	0.549833
PCDHB8	459.389	0.00616538	0.0859684	0.0477875	0.551225
PGLYRP3	36.7319	0.000994359	0.0857294	0.0478069	0.551225
ADAP2	1798.2	-0.0376325	0.0958809	0.0478688	0.551291
FGF23	7.04566	0.00359364	0.0858284	0.0478615	0.551291
H1F0	14983.3	-0.015738	0.0873649	0.0479294	0.551342
TRMT6	1069.22	0.055371	0.107399	0.0479098	0.551342
FASLG	102.719	0.0137066	0.0870491	0.048048	0.551414
MAN1A1	8557.24	0.019281	0.0883751	0.0479867	0.551414
PTEN	49505	-0.0412422	0.0979078	0.0480465	0.551414
USP51	310.963	-0.0357156	0.0946223	0.0479948	0.551414
ALOXE3	136.839	-0.00464655	0.0858198	0.0481651	0.551469
C11orf95	928.327	0.0335906	0.0939606	0.0481307	0.551469
MOGS	5249.63	0.0627202	0.113966	0.0481641	0.551469
TIMP3	8385.53	-0.0246091	0.0901946	0.0481559	0.551469
COL11A1	10972.1	-0.0124605	0.0868306	0.0482153	0.55157
ZNF134	1201.05	-0.0477845	0.102296	0.0482301	0.55157
HIST1H3D	4180.65	0.0176969	0.0878601	0.0482674	0.551597
INSL3	19.59	0.0142444	0.087146	0.0482887	0.551597
CSF2RB	2730.28	0.016803	0.0876917	0.04856	0.55223
INTS10	4767.92	0.0441093	0.0999259	0.0485511	0.55223
LILRB5	1091.8	-0.0294362	0.0920668	0.0485774	0.55223
LOC101054525	25.1844	-0.00308674	0.0857851	0.0485121	0.55223
NPL	1551.98	-0.0367439	0.0953814	0.0484722	0.55223
PADI1	10.0323	-0.0132996	0.0870507	0.0484374	0.55223
PLEKHF1	518.706	0.0139735	0.0870955	0.0484373	0.55223
PYGB	7907.89	0.0273406	0.0910326	0.0485972	0.55223
TGFBR3L	244.832	-0.00710234	0.0860513	0.0485351	0.55223
CAPN5	1950	-0.022342	0.0892291	0.0490351	0.553364
FBXL7	1019.04	-0.0199586	0.0885173	0.0490244	0.553364
ITGB8	4264.58	0.0112618	0.0866739	0.0490148	0.553364
LOC101928063	14.54	-0.0279947	0.09141	0.0488872	0.553364
LOC101929427	25.4264	0.00540007	0.0859403	0.0487937	0.553364
LRRN1	682.347	0.0160376	0.0876311	0.0489504	0.553364
MAP3K10	1721.2	0.0479377	0.102072	0.0488528	0.553364
NLRC5	8688.24	0.0302843	0.0922782	0.0489531	0.553364
SYMPK	9851.98	0.0381904	0.0964076	0.0487945	0.553364
ZDHHC11	977.365	-0.021427	0.089	0.0489786	0.553364
ZNF132	212.381	0.0205432	0.0886791	0.0488037	0.553364
ZSCAN23	181.139	0.0192937	0.0884128	0.0489211	0.553364
CDK11A	2359.8	0.0248778	0.0902578	0.049137	0.554088
GP1BA	115.615	0.00832843	0.0861598	0.0491557	0.554088
SLC45A1	345.054	-0.0120773	0.08668	0.0492088	0.554368
ATP6V1G2	65.5952	-0.00795915	0.0860974	0.0492733	0.554616
MAGEA9B	9.45429	0.00437826	0.0858794	0.0492872	0.554616
SSTR3	22.2121	0.0136746	0.087047	0.0493324	0.554617
TMEM255B	934.024	-0.0211017	0.0889432	0.0493439	0.554617
FTH1	67170.8	-0.033751	0.0938405	0.0494095	0.555038
CORO1A	2235.22	0.0330181	0.0935341	0.0496759	0.557711
ENAM	24.612	-0.00858286	0.0862114	0.0500401	0.558152
GPR115	139.937	0.0032232	0.085791	0.0499659	0.558152
HCRTR1	9.9884	0.00870493	0.0862486	0.0498966	0.558152
IFT88	1723.8	-0.0558365	0.108217	0.0498815	0.558152
INTS6	4622.81	-0.0879065	0.13361	0.0498671	0.558152
NUDT13	198.698	-0.0271085	0.0910439	0.0500235	0.558152
PFKFB1	825.749	-0.00958321	0.0863126	0.0500164	0.558152
PLA2G15	1390.27	-0.0323367	0.0930705	0.0498949	0.558152
PLS1	1401.58	-0.0133449	0.0868365	0.0500563	0.558152
PRDM1	3370.1	0.0201331	0.0885849	0.0499897	0.558152
SRD5A2	132.522	-0.00375597	0.085816	0.0500421	0.558152
XCL1	78.2643	0.0186102	0.0882712	0.0498643	0.558152
SNORD114-8	2.45195	-0.00940233	0.0863711	0.0502325	0.559799
DHRS7	3243.3	-0.038261	0.0961741	0.0502891	0.560112
ZFAT	1577.07	0.0453256	0.100705	0.0503197	0.560135
ATRNL1	1226.57	-0.00893048	0.086286	0.0503557	0.560218
H2AFJ	5134.18	-0.0140078	0.087061	0.0505295	0.561752
ZBTB10	5658.89	-0.0276684	0.0910237	0.0505508	0.561752
PHKA1	1969.76	0.0257572	0.0904961	0.0506271	0.562281
IFT74	1399.22	-0.0512077	0.104795	0.0506939	0.562705
LOC101928477	64.9317	0.00214891	0.0857514	0.0508024	0.562976
PTCHD2	289.924	-0.00515971	0.0858863	0.0508043	0.562976
TMEM107	289.305	-0.0567144	0.108735	0.0507496	0.562976
AK2	3354.97	0.0383402	0.0964438	0.051049	0.563025
CCDC134	738.511	0.0356471	0.094919	0.0509037	0.563025
CHADL	170.013	-0.0171832	0.0877149	0.0510668	0.563025
NLRC3	548.817	0.0218769	0.089118	0.0509021	0.563025
NRK	437.221	-0.0096186	0.086372	0.0508632	0.563025
PIGC	1902.86	-0.0556229	0.108003	0.0509698	0.563025
RFPL3S	146.744	0.0140397	0.087051	0.0510015	0.563025
SLC4A11	1288.7	-0.0162679	0.0875764	0.0509803	0.563025
SUB1	4697.9	0.0257181	0.0905022	0.051016	0.563025
APOL6	2447.02	0.0171886	0.0878279	0.0513866	0.563222
ATAD3A	2620.09	0.0333078	0.0937609	0.0516306	0.563222
BSN	1555.22	-0.00440556	0.08582	0.0514649	0.563222
CATSPERG	995.061	0.0194599	0.0884515	0.0513789	0.563222
CCR6	72.283	0.01874	0.0881992	0.0514005	0.563222
DEFB1	236.277	0.00594319	0.0859469	0.051687	0.563222
EIF4E3	953.095	-0.035023	0.0946364	0.051287	0.563222
ENPP2	1976.44	0.0164196	0.0876216	0.0513042	0.563222
HOXC5	305.898	-0.00759986	0.0860699	0.0516295	0.563222
HUS1B	86.5333	0.0158866	0.0874897	0.051553	0.563222
LOC642236	327.064	0.029647	0.0915754	0.0512601	0.563222
MIR662	15.5851	0.00211087	0.0857448	0.0515739	0.563222
OPTN	6093.65	0.0243754	0.089999	0.051547	0.563222
POM121L4P	146.8	-0.00220943	0.085744	0.0514514	0.563222
SLC1A2	791.291	-0.00530457	0.0859005	0.0515579	0.563222
SLC46A3	1520.9	-0.0345236	0.0940953	0.0514733	0.563222
SOX6	1788.11	0.0125513	0.0868658	0.051135	0.563222
SRGAP3	1152.61	-0.0383886	0.0963551	0.0515448	0.563222
TMEM105	47.0116	-0.00973047	0.0864019	0.0513049	0.563222
TMEM55B	1182.01	-0.0535965	0.106374	0.0516669	0.563222
VILL	882.873	0.0299585	0.0920656	0.0515197	0.563222
CELSR3	4637.71	-0.00835705	0.0861746	0.051751	0.563607
KEL	146.324	0.0171387	0.0878295	0.0518878	0.564157
OTOR	22.809	-0.00413224	0.0858636	0.0518824	0.564157
TRANK1	6295.88	0.0282794	0.0913136	0.0518863	0.564157
CAPZA3	11.849	-0.00418212	0.0858466	0.0522303	0.564241
CNGA1	285.887	0.00777087	0.0861146	0.0520641	0.564241
GPR85	42.8684	0.0173965	0.0877923	0.0522771	0.564241
GSPT1	18104.6	0.0335597	0.0938682	0.0520799	0.564241
LONRF2	772.42	-0.00298762	0.0857653	0.0522307	0.564241
MEP1A	26.9559	0.00924231	0.0862866	0.0521337	0.564241
MICALL1	5785.93	0.0314344	0.0929262	0.0520349	0.564241
MUC4	1054.11	0.00714049	0.0860393	0.0519693	0.564241
PRLR	4348.37	-0.0231122	0.0894646	0.0520303	0.564241
SCNN1A	3251.25	-0.0193424	0.0884625	0.0521904	0.564241
SMARCD2	3384.16	-0.0452658	0.100401	0.0522861	0.564241
TRPC4	88.3035	-0.0323682	0.0933121	0.0521916	0.564241
ZFHX2	1482.58	-0.0243101	0.0898973	0.0520414	0.564241
ZNF461	909.941	0.0358391	0.0949785	0.0522978	0.564241
MYL6	16020.4	-0.0509687	0.104043	0.0524483	0.564751
NOC2L	5171.72	0.04564	0.100816	0.0524056	0.564751
PROX1	2973.08	0.0111552	0.0865805	0.0524267	0.564751
PTPLB	2252.39	-0.0417139	0.0983397	0.0524888	0.564751
ZNF573	1617.64	0.02808	0.0912748	0.0524844	0.564751
CYP19A1	59.7404	-0.0171614	0.087896	0.0525829	0.565453
SLC2A5	411.655	0.0157166	0.0874915	0.0526986	0.566387
CELSR1	24506.4	-0.0152764	0.0873019	0.0527761	0.56691
CLEC19A	7.35715	-0.0159142	0.0875475	0.052808	0.566943
KNTC1	11580.8	0.0249172	0.0902478	0.052839	0.566965
KRT85	6.37598	0.00382638	0.0858258	0.0530453	0.568247
LPPR2	2644.51	-0.0201364	0.0884668	0.0530239	0.568247
ODF3L1	32.7975	-0.0200776	0.0885175	0.0530277	0.568247
RAB35	3606.94	0.0749372	0.122987	0.0531438	0.568847
VWA5A	1080	0.022123	0.0891062	0.0531592	0.568847
BDKRB1	66.4491	-0.00826845	0.0861264	0.0533064	0.570111
BAG5	1846.66	0.0714664	0.120143	0.0534031	0.570505
FATE1	5.77206	0.0104539	0.0865286	0.0535342	0.570505
MTFR2	416.512	0.0186833	0.0881996	0.0535488	0.570505
POU3F1	38.9536	0.0165626	0.0875512	0.0535274	0.570505
PRELP	3043.66	0.0222515	0.0893272	0.0535315	0.570505
TGFB1	3996.93	-0.0576134	0.108717	0.0534103	0.570505
TMEFF2	3.87336	0.00771424	0.0861711	0.0535756	0.570505
TRMU	1469.28	0.0670302	0.117646	0.0535542	0.570505
GRIA1	28.7115	0.0114828	0.0866615	0.0536706	0.571206
PDE8B	357.106	0.0178163	0.0880183	0.0537011	0.571222
LOC390937	42.5995	0.0203605	0.0886276	0.0538095	0.571755
LRG1	2480.62	-0.0119165	0.0866904	0.0537968	0.571755
SOCS6	2297.15	-0.0447113	0.0999672	0.0538808	0.571894
TMC3	5.62066	-0.00727984	0.0861232	0.0538663	0.571894
TMEM56	421.733	-0.0212228	0.0889962	0.0539448	0.572264
CACNG7	10.956	-0.0121883	0.0867662	0.0540171	0.572413
PGAM2	84.8917	-0.0187531	0.0881942	0.0539906	0.572413
LYPLAL1	1528.91	-0.0494908	0.103116	0.0540469	0.572419
FYN	15796.6	0.0304351	0.0923468	0.0540924	0.572592
TCEANC2	194.39	0.0727201	0.121672	0.0541378	0.572764
TTC34	38.1323	0.0214391	0.0889377	0.054193	0.572831
ZNF675	4121.72	-0.0321443	0.0931594	0.0542025	0.572831
IPMK	1181.15	0.0315713	0.0927822	0.054263	0.573162
GPRC5C	1589.75	-0.017046	0.0877681	0.0543793	0.573371
LGR5	179.645	-0.0157143	0.0875224	0.0543406	0.573371
MIR23A	19.9079	-0.0260314	0.090663	0.0543995	0.573371
U2AF1L4	561.465	0.0366127	0.0953389	0.0543742	0.573371
COPG2	901.006	0.037573	0.0957096	0.0545579	0.574731
CMTM4	873.583	-0.0405934	0.0974518	0.0548845	0.574989
DNM1P46	77.263	0.0152755	0.0873322	0.0548216	0.574989
FGFR1	34780	-0.0141538	0.0870708	0.0547807	0.574989
GTF3C6	1859.8	0.0242013	0.0899564	0.0548243	0.574989
HIST1H2BH	7969.9	0.0106047	0.086414	0.0547334	0.574989
LYSMD4	270.985	0.0462024	0.101058	0.0546284	0.574989
MAS1L	7.55655	0.00634332	0.0860246	0.0549044	0.574989
MIR4251	6.60665	0.00661039	0.086037	0.0548684	0.574989
REC8	709.537	0.0349574	0.0944521	0.05472	0.574989
UBL3	1508.92	-0.0347235	0.0941974	0.054864	0.574989
ZAP70	723.021	0.0203496	0.0886809	0.0546941	0.574989
C9orf117	112.009	-0.00639241	0.0859869	0.0550576	0.57562
HBG2	72.6432	0.0112984	0.0866178	0.0550329	0.57562
LAMB2	16959.9	-0.0368754	0.0953623	0.0551063	0.57562
NPY	3.51984	0.00452905	0.0858864	0.0551113	0.57562
TUBB8	85.5074	0.0311079	0.092753	0.0550386	0.57562
SNORD13	188.324	-0.014114	0.0870917	0.0551548	0.575768
FAM188A	1834.22	0.0287369	0.0915138	0.0551945	0.575877
PDLIM5	9037.84	-0.0331677	0.0934415	0.05525	0.576149
AGR2	4378.26	-0.00196453	0.0857458	0.0553892	0.576702
CBLN4	31.0598	-0.0126522	0.0867615	0.0554205	0.576702
MAST1	561.567	-0.00461641	0.0858079	0.0554173	0.576702
SNORD114-23	5.51204	-0.01059	0.0865384	0.0553626	0.576702
MIR200B	34.8079	0.0230086	0.0895478	0.0554542	0.576747
MICB	680.856	-0.0291414	0.0918267	0.0555164	0.577088
MAP1LC3A	1480.81	0.0355402	0.0947711	0.0556059	0.577713
GBP1	7568.38	0.0170521	0.0878105	0.0556534	0.577901
LOC100996842	207.184	-0.0245993	0.0898196	0.0556862	0.577936
RGL4	22.6268	0.0200806	0.088615	0.0557644	0.578176
SLC25A27	551.052	-0.02019	0.0886315	0.0557683	0.578176
MT2A	16543.5	-0.0233839	0.0895805	0.0558199	0.578406
DUSP22	1506.28	0.032674	0.093322	0.0558766	0.578688
ARHGAP12	6160.28	0.0389077	0.096562	0.0559927	0.578974
GAL3ST1	74.3291	-0.0116902	0.0866949	0.0559392	0.578974
SCARNA3	113.816	-0.0447986	0.0999847	0.0559819	0.578974
ALDH1L2	1750.2	0.0166235	0.0876265	0.0562073	0.579275
CLEC4M	226.614	0.00738872	0.0860995	0.0561581	0.579275
FAM149A	532.972	0.0172464	0.0877972	0.0561137	0.579275
GTPBP4	5964.77	0.0335909	0.0938179	0.056082	0.579275
LPPR3	320.228	-0.00462977	0.0858127	0.0562283	0.579275
PTPRQ	784.574	0.00848169	0.0862453	0.0560754	0.579275
TBC1D12	1561.25	-0.0473916	0.100984	0.0561886	0.579275
ANKS4B	106.275	-0.0068703	0.0860922	0.0564249	0.580692
DDX43	294.786	0.00544872	0.0858831	0.0564144	0.580692
IGFLR1	594.775	0.024923	0.0900319	0.0564876	0.580868
KIAA1467	1835.95	-0.0111691	0.0865185	0.0565012	0.580868
FRMPD3	258.998	-0.0193927	0.0884507	0.0565893	0.581469
TRIM16	2135.62	0.0243349	0.0899811	0.0566204	0.581484
LOC101929072	9.50278	-0.020941	0.0888752	0.0568037	0.582771
TMEM66	9818.18	-0.0348153	0.0941259	0.056805	0.582771
HNF1B	182.924	0.0107001	0.0865975	0.0570569	0.584044
NUDT19	1257.18	0.024279	0.0899525	0.0569758	0.584044
PPP5D1	54.5962	0.0254723	0.0904147	0.0570778	0.584044
STAT1	20931.1	0.0280948	0.0913596	0.0570506	0.584044
ZIC2	411.595	-0.0012436	0.0857202	0.056989	0.584044
DFNA5	368.188	-0.0302392	0.0920992	0.0571531	0.584509
GJD3	160.795	0.0266132	0.0907586	0.0572937	0.585469
PPM1E	579.272	-0.00789364	0.0861205	0.0573065	0.585469
FAM43B	7.70515	-0.0174564	0.0878913	0.0573831	0.585946
SEMA3F	7924.51	-0.0115424	0.0865942	0.0574309	0.58613
TAGLN3	17.3948	0.00527831	0.0859003	0.0575133	0.586601
ZNF420	1066.94	0.0427188	0.0987384	0.0575368	0.586601
STOML1	421.661	0.0508447	0.10389	0.0576274	0.587219
ERICH2	122.501	-0.0205981	0.088751	0.0576751	0.587401
XRN1	11883	0.0475126	0.101495	0.0577738	0.588092
ZFR	11980	0.0407541	0.097591	0.0578029	0.588092
ANKRD13A	2459.02	0.0489978	0.102729	0.0579061	0.58842
CLEC1B	148.836	0.0120931	0.0867744	0.0579807	0.58842
CNNM1	82.8772	-0.00928655	0.086309	0.0579429	0.58842
FMN1	3040.07	-0.0240577	0.0896775	0.0579091	0.58842
LRRC16A	4576.15	0.0497428	0.10383	0.0580037	0.58842
NPY4R	86.7098	0.00454619	0.0858326	0.0580149	0.58842
SLC18A1	17.1576	0.00630538	0.085992	0.0581511	0.589496
FERMT1	389.081	0.0114877	0.0866915	0.0586225	0.593969
FKBP3	2852.7	-0.029906	0.0917724	0.0586707	0.59415
AGBL2	323.492	-0.0181421	0.0879582	0.0588702	0.59438
PTGS1	1533.31	-0.0346081	0.0940634	0.0587456	0.59438
RAB3B	79.2721	-0.0143616	0.0870879	0.0588712	0.59438
RHBDD1	1801.98	0.0394883	0.0967365	0.0588081	0.59438
RNASEL	808.938	-0.0455914	0.100102	0.0587934	0.59438
ZNF30	517.438	0.0370674	0.0954426	0.058875	0.59438
C1orf52	906.853	0.0619953	0.111082	0.0593569	0.594612
CHMP7	1184.6	0.0524964	0.104205	0.0591691	0.594612
FAM101A	10.796	0.00934293	0.086357	0.0589901	0.594612
GPSM3	731.604	0.0209573	0.0886564	0.0592392	0.594612
HKR1	3755.84	0.0290423	0.0917699	0.0589789	0.594612
KCNN3	542.524	0.017801	0.0878988	0.0591684	0.594612
KRT1	13136.1	0.0103563	0.0863911	0.0593565	0.594612
LCE1C	245.429	0.00839146	0.0862447	0.0590469	0.594612
RDH16	1344.83	-0.0137763	0.0869882	0.0592744	0.594612
RGS11	1286.07	-0.00631613	0.085958	0.0591609	0.594612
RYR1	2043.22	-0.0284784	0.0914611	0.0590526	0.594612
SNTN	3.34063	-0.00334921	0.0858003	0.0591383	0.594612
TACR3	2.83503	0.00379246	0.0858343	0.0592061	0.594612
TRMT61A	711.867	0.0811033	0.125959	0.0593195	0.594612
VIPR2	204.763	0.0115756	0.0866343	0.0593824	0.594612
WISP3	33.2191	0.003209	0.0857836	0.0592241	0.594612
ZNF343	1382.2	0.0580043	0.108306	0.0594223	0.594708
CARD14	1379.41	-0.0169422	0.0876291	0.0595216	0.595095
OPRK1	112.098	0.00536883	0.0859217	0.059501	0.595095
PTPRM	6217.9	0.0358741	0.0947229	0.0595965	0.595238
ZNF780B	4016.71	0.0419862	0.0982576	0.059578	0.595238
HIST1H2BO	4747.23	0.0165053	0.0874742	0.0596971	0.595636
SNORD15A	126.065	-0.0248244	0.0899696	0.0596944	0.595636
CEP19	130.636	-0.0329625	0.0933227	0.0598518	0.595716
CLNK	60.598	0.0185126	0.0880853	0.0597582	0.595716
PGLYRP2	1064.09	-0.00503335	0.0858888	0.0598568	0.595716
PSMB8-AS1	674.294	0.0212607	0.0888614	0.0597779	0.595716
TMEM210	14.5685	-0.00872661	0.0862397	0.0598138	0.595716
ZFP14	1004.54	0.0334744	0.0938374	0.0600055	0.596894
SQSTM1	21464.9	-0.0341625	0.0938598	0.0601099	0.59763
EAF2	860.179	0.0175364	0.0878534	0.0602471	0.597782
HHAT	762.187	-0.0317386	0.0927819	0.0602393	0.597782
ITIH6	244.346	-0.00689054	0.086024	0.0602201	0.597782
TADA3	3201.01	-0.0536284	0.104968	0.0602378	0.597782
LINC00982	21.02	0.0087321	0.0862421	0.0603147	0.597849
PTGDR	117.561	0.0218087	0.0891216	0.0602922	0.597849
BTN3A2	2431.84	0.0243148	0.0898842	0.0604764	0.598153
DPCR1	48.0766	-0.00853115	0.0862167	0.0605586	0.598153
ELANE	22.0493	-0.0152062	0.0873696	0.0604839	0.598153
GLIS1	62.2443	-0.0120192	0.0867046	0.0604947	0.598153
MIR92B	9.15256	-0.0175294	0.0878753	0.0605327	0.598153
SCIN	342.741	-0.019581	0.0884296	0.060533	0.598153
SLC26A1	386.847	-0.00656875	0.085967	0.0604952	0.598153
CHODL	178.349	0.00525011	0.085883	0.0607921	0.598953
LINC00467	143.444	-0.0411491	0.0974084	0.0607564	0.598953
SLC11A1	2616.77	-0.0226631	0.0892468	0.0607728	0.598953
TRIM43B	10.9374	0.00217362	0.0857568	0.0606719	0.598953
ZNF260	1816.92	0.0360856	0.0948628	0.0607228	0.598953
DHRS13	615.599	0.0213375	0.0887998	0.0608943	0.599359
NPTXR	533.634	-0.0210097	0.0887594	0.0608804	0.599359
PPEF1	251.893	-0.0112582	0.0865042	0.0610067	0.599564
SLC26A3	54.8417	-0.00419228	0.0858304	0.0609489	0.599564
SYT4	26.9196	0.00205456	0.0857348	0.0609897	0.599564
[truncated: 17,638 more rows]

## Sheet: week8_R_vs_NR_DEgenes
Supplementary Table 13. The results of DE analysis between responders and non-responders at week 8 performed by DESeq2.
Gene	baseMean	log2FoldChange	lfcSE	pvalue	padj
COL11A1	9465.67	-6.99823	0.770915	4.54561e-21	7.74527e-17
LRP2	7815.1	3.82392e-06	0.0014427	1.79941e-13	1.533e-09
MXRA5	53586.1	-5.07901e-06	0.0014427	1.97778e-11	1.12331e-07
POSTN	62088.2	-2.49376e-06	0.0014427	6.59175e-10	2.80792e-06
BMPR1B	2499.94	-4.58097e-06	0.0014427	2.82352e-09	8.11109e-06
NPTX2	230.416	-2.65562e-06	0.0014427	2.85619e-09	8.11109e-06
COL1A2	167768	-3.85266e-06	0.0014427	8.51664e-09	2.07307e-05
GALNT5	679.729	-2.28034e-06	0.0014427	1.49318e-08	3.18028e-05
COL1A1	433197	-3.1933e-06	0.0014427	2.20525e-08	4.17503e-05
MMP2	38561.1	-4.08288	0.833524	3.23815e-08	5.51748e-05
PTPRD	2399.57	-4.78847	0.983787	3.61226e-08	5.59539e-05
COL3A1	299975	-3.10574e-06	0.0014427	1.11787e-07	0.000158729
FCAMR	194.127	8.49395	1.84406	2.46599e-07	0.00032113
SERPINA9	239.427	6.80961	1.51663	2.63855e-07	0.00032113
ELL3	769.155	3.67207e-06	0.0014427	3.1144e-07	0.000353775
ESRP1	9563.36	4.23647e-06	0.0014427	3.82845e-07	0.000407706
CBLC	1553.52	3.29289e-06	0.0014427	4.26115e-07	0.000427093
THBS4	2853.16	-3.63537e-06	0.0014427	4.96632e-07	0.000470117
COL6A6	1984.14	-1.20753e-06	0.0014427	6.26662e-07	0.000561984
MMP11	5662.22	-3.8628	0.906744	6.7597e-07	0.000575893
CCL21	4730.86	7.42864	1.85031	9.65771e-07	0.000733684
ECM1	3321.44	-3.06704e-06	0.0014427	1.00743e-06	0.000733684
GJB5	67.9014	2.98128e-07	0.0014427	1.03342e-06	0.000733684
PTGER3	490.016	-3.41409e-06	0.0014427	9.14234e-07	0.000733684
ASPN	7287.59	-2.5025e-06	0.0014427	1.31864e-06	0.000898736
LRRC15	2746.7	-3.10322e-06	0.0014427	1.37262e-06	0.000899544
CDH1	72062.8	3.99618e-06	0.0014427	1.6293e-06	0.00102124
TFAP2A	4705.35	2.57754e-06	0.0014427	1.6782e-06	0.00102124
COL5A2	19701.8	-3.18001e-06	0.0014427	1.84578e-06	0.00108449
C4orf19	151.488	3.36902e-07	0.00144269	2.3177e-06	0.00128865
IGFL1	158.122	11.0531	3.29818	2.34451e-06	0.00128865
ACOX2	653.976	-1.52515e-06	0.0014427	2.5565e-06	0.00132001
RHOV	344.484	2.53681e-06	0.0014427	2.49213e-06	0.00132001
HMCN1	22977.2	-2.19195e-06	0.0014427	3.28144e-06	0.00164448
FN1	254024	-3.88133e-06	0.0014427	3.63871e-06	0.00177143
PDGFRL	804.524	-3.19036e-06	0.0014427	3.80708e-06	0.00180191
NRK	568.417	-1.84604e-06	0.0014427	4.15808e-06	0.00191485
CNTN3	293.017	-1.70694e-06	0.0014427	4.43163e-06	0.00198712
EDIL3	3358.67	-2.13723e-06	0.0014427	5.20388e-06	0.00221672
TNFSF11	234.171	4.07781	1.086	5.13301e-06	0.00221672
SIGLEC12	143.567	4.89293	1.32196	5.81241e-06	0.00241555
THBS2	25442.8	-3.71372e-06	0.0014427	6.19704e-06	0.00251408
ANGPTL2	5449.35	-3.92467e-06	0.0014427	7.77111e-06	0.00307935
CTHRC1	3115.59	-3.37756e-06	0.0014427	8.30193e-06	0.00321492
CST1	89.0346	-2.76913e-07	0.00144269	9.8649e-06	0.00365409
MYH14	13705.4	2.5474e-06	0.0014427	9.71616e-06	0.00365409
LAD1	2198.74	3.56723e-06	0.0014427	1.14568e-05	0.00415346
FAM129C	742.489	3.34556	0.94409	1.22441e-05	0.00434639
SCUBE1	875.742	-3.85483e-06	0.0014427	1.27992e-05	0.00445074
MMP13	1548	-1.13119e-06	0.0014427	1.39671e-05	0.00475972
HTRA1	8920.15	-4.24624e-06	0.0014427	1.87759e-05	0.00627301
BIK	280.826	2.06864e-06	0.0014427	1.98805e-05	0.00645765
MRC2	16350.2	-3.83678e-06	0.0014427	2.00866e-05	0.00645765
AP1M2	2501.6	3.1742e-06	0.0014427	2.11606e-05	0.00667695
CLEC17A	238.746	4.10674	1.22316	2.17275e-05	0.00673119
FXYD3	2514.14	1.66171e-06	0.0014427	2.38112e-05	0.00724499
P2RX2	76.8575	6.48518	1.86696	2.4811e-05	0.00741674
CD22	4044.25	3.24261	0.975361	2.59686e-05	0.00762893
WBSCR17	272.642	-2.5181e-06	0.0014427	2.83545e-05	0.00818869
MUC4	911.521	5.01525	1.55672	2.93128e-05	0.00832434
EPB41L4B	1032.88	3.67e-06	0.0014427	3.03624e-05	0.00848105
PRSS8	2480.81	2.65365e-06	0.0014427	3.10349e-05	0.00852908
LOX	1997.38	-3.54974e-06	0.0014427	3.17895e-05	0.00859781
CHIT1	6920.37	-1.19203e-06	0.0014427	3.58564e-05	0.00931316
CTSD	121949	-4.2307e-06	0.0014427	3.71674e-05	0.00931316
KRT19	60383.1	4.08374e-06	0.0014427	3.66596e-05	0.00931316
PTPRQ	285.469	6.2956	1.99721	3.64271e-05	0.00931316
ROR2	1784.86	-3.92089e-06	0.0014427	3.71459e-05	0.00931316
COL5A1	62206.9	-2.13628e-06	0.0014427	4.00214e-05	0.00988296
VCAN	43038.5	-3.6035e-06	0.0014427	4.62088e-05	0.0112479
MAL2	8842.46	3.32805e-06	0.0014427	4.87312e-05	0.0116948
SLC26A7	263.593	1.18993e-06	0.0014427	5.00282e-05	0.0118393
ADRA1A	146.409	4.47265	1.45672	5.283e-05	0.0121645
PLD5	77.1323	7.53857	2.22797	5.27658e-05	0.0121645
SHISA3	111.859	4.97182	1.63565	5.77198e-05	0.0131132
KDF1	427.079	2.78471e-06	0.0014427	6.09915e-05	0.0136741
FLG	559.784	-8.29475e-07	0.0014427	6.59052e-05	0.0145839
ECM2	2964.93	-3.72528e-06	0.0014427	7.17856e-05	0.0152016
FAP	3636.05	-3.71631e-06	0.0014427	7.27996e-05	0.0152016
RBP5	566.218	3.03966	1.01139	7.31577e-05	0.0152016
SPARC	54664.7	-3.08096e-06	0.0014427	7.1752e-05	0.0152016
TLX1	138.11	2.1067e-07	0.00144269	7.06154e-05	0.0152016
GPC6	952.848	-2.30857e-06	0.0014427	7.67136e-05	0.015561
TNFAIP6	364.405	-1.99494e-06	0.0014427	7.61542e-05	0.015561
ADAMTS12	3553.6	-3.44608e-06	0.0014427	8.12713e-05	0.0162915
CAMSAP3	3900.3	3.33922e-06	0.0014427	8.46555e-05	0.0163914
CILP	6388.46	-1.94287e-06	0.0014427	8.28047e-05	0.0163914
SLC47A1	590.203	-2.56599e-06	0.0014427	8.41018e-05	0.0163914
CD177	413.023	-1.67853e-06	0.0014427	8.86096e-05	0.0165914
SPATA18	502.122	-2.92008e-06	0.0014427	8.738e-05	0.0165914
TREM2	800.147	-1.6727e-06	0.0014427	8.83475e-05	0.0165914
S100A14	1840.41	3.18855e-06	0.0014427	9.4854e-05	0.0175676
ESRP2	2538.08	3.6079e-06	0.0014427	9.97162e-05	0.0178849
KLK6	463.008	-2.03257e-07	0.00144269	9.79082e-05	0.0178849
LCN8	49.9973	8.98728	3.51476	9.93179e-05	0.0178849
IRX5	4437.42	-3.37807e-06	0.0014427	0.000105863	0.0187896
KRT8	28795.6	2.73346e-06	0.0014427	0.000113185	0.019882
CPXM1	3308.64	-3.41423e-06	0.0014427	0.000123458	0.0214653
AFF2	707.496	3.11073	1.1115	0.000126492	0.0217706
LRP1	145385	-3.96316e-06	0.0014427	0.00013064	0.0222598
CCDC80	23809.7	-3.93241e-06	0.0014427	0.000143639	0.0242324
GRIN2B	170.812	6.17632e-07	0.0014427	0.000155206	0.025927
FNDC1	16402.8	-2.09337e-06	0.0014427	0.00015973	0.0261697
PPAPDC1A	215.764	-1.31321e-06	0.0014427	0.00015929	0.0261697
SAA1	1195.46	8.81254e-07	0.0014427	0.000169685	0.0275358
ITGA11	5656.45	-3.12255e-06	0.0014427	0.000177655	0.0285572
OR5P3	65.8347	1.91824e-07	0.00144269	0.000191915	0.0305612
CGREF1	572.51	-2.6718	1.00589	0.000203434	0.0320955
MUC6	80.0027	-1.70948e-06	0.0014427	0.000205352	0.0321009
OGN	1693.91	-1.64561e-06	0.0014427	0.000210403	0.0325915
GRHL2	3101.33	3.03555e-06	0.0014427	0.000218673	0.0334121
SEMA3C	5809.12	-2.92208e-06	0.0014427	0.000220088	0.0334121
TMEM132C	128.087	4.26649	1.67947	0.000221584	0.0334121
ALDH1A1	5418.41	-3.13418e-06	0.0014427	0.000233617	0.0349175
PKP2	1879.66	2.35405e-06	0.0014427	0.000237421	0.0351776
CREB3L1	5032.77	-1.63152e-06	0.0014427	0.000240731	0.0353605
ANGPTL1	734.463	-1.90291e-06	0.0014427	0.000252099	0.0364027
FBLN2	10116.2	-3.5886e-06	0.0014427	0.000251349	0.0364027
SH3GL1P2	116.525	-1.91509e-06	0.0014427	0.000266513	0.0381607
BCL7A	660.55	3.21784e-06	0.0014427	0.00028105	0.0386195
CLDN4	5404.06	2.55131e-06	0.0014427	0.000273205	0.0386195
GALNT14	223.677	1.44158e-06	0.0014427	0.000275256	0.0386195
PCDH15	179.396	6.57106e-07	0.0014427	0.000279908	0.0386195
TNFRSF13C	471.945	3.47201	1.42354	0.000280614	0.0386195
OVOL1	342.321	2.5176e-06	0.0014427	0.000293042	0.0399451
LRRC17	625.57	-2.71064e-06	0.0014427	0.000317544	0.0429415
CFD	2428.52	-3.56905e-06	0.0014427	0.000330262	0.0443097
HS3ST2	1984.06	-1.71511e-06	0.0014427	0.000387584	0.0515941
MUC15	632.474	1.28032e-06	0.0014427	0.000394229	0.0520718
OSR2	780.766	-3.11891e-06	0.0014427	0.000409997	0.0533277
SOX8	141.788	3.50283	1.54506	0.000408516	0.0533277
FCRL1	1037.62	3.82839	1.67711	0.000416173	0.053721
SLITRK4	255.501	-2.82802	1.21672	0.000430076	0.0550982
CR2	3132.41	3.84754	1.696	0.000461337	0.0586621
PCDHAC2	254.123	2.64384	1.16505	0.000480566	0.0606546
ADAMTSL3	907.161	2.67666e-06	0.0014427	0.000490261	0.0614233
KCNK2	173.812	-1.0471e-06	0.0014427	0.000496534	0.0617551
PMEL	342.201	-2.32155e-06	0.0014427	0.000505776	0.0624487
GPR133	1116.46	-2.83002e-06	0.0014427	0.000518021	0.0635005
MRC1	476.832	-4.71285e-07	0.0014427	0.000522269	0.0635638
ITGBL1	2367.5	-2.25021e-06	0.0014427	0.000529314	0.0639644
ELANE	44.84	-6.81548e-07	0.0014427	0.000552653	0.0658686
PPM1E	413.157	2.08573e-06	0.0014427	0.000552803	0.0658686
ADAMTS16	677.178	-1.79775e-06	0.0014427	0.000558792	0.0660308
FLNC	4398.98	-3.29386e-06	0.0014427	0.000561915	0.0660308
ADORA3	936.214	-1.76802e-06	0.0014427	0.000581648	0.0674197
CLEC4M	100.652	4.90932	2.57691	0.000581097	0.0674197
KIAA1549L	1237.17	-1.53481e-06	0.0014427	0.000586222	0.0674908
FCRL4	105.745	4.75899	2.50237	0.00060126	0.0687575
TMEM178B	348.148	2.67524e-06	0.0014427	0.000605935	0.0688301
ADAMTS2	8661.74	-2.45122e-06	0.0014427	0.000635749	0.0712666
CCL19	3167.12	4.55272	2.46299	0.000633283	0.0712666
CILP2	871.785	-2.39048e-06	0.0014427	0.000676037	0.0752875
OVOL2	322.668	1.47046e-06	0.0014427	0.000705005	0.0780037
AIRE	40.746	1.20603e-06	0.0014427	0.000713718	0.0784584
C7	15857	3.94426	2.07707	0.00075101	0.0820286
PKD2L1	227.253	-2.10804e-06	0.0014427	0.000784483	0.0851389
COL8A1	3044.76	-2.48101e-06	0.0014427	0.000796573	0.0859038
ADM2	282.45	2.39382e-06	0.0014427	0.000813989	0.0868407
ELF3	7817.45	2.69272e-06	0.0014427	0.00082019	0.0868407
LILRB5	2117.26	-2.55649e-06	0.0014427	0.00082055	0.0868407
CD19	1109.17	3.27485	1.70709	0.000852811	0.0896978
OPN4	45.8701	-6.91365e-07	0.0014427	0.000864978	0.0904194
FABP7	32.7049	5.99872e-07	0.0014427	0.000911313	0.0914177
MFAP2	1783.18	-2.23499e-06	0.0014427	0.000885979	0.0914177
NUPR1	7185.87	-2.88456e-06	0.0014427	0.000887843	0.0914177
OMD	731.366	-1.94373e-06	0.0014427	0.000896607	0.0914177
P4HA3	500.62	-2.0004e-06	0.0014427	0.000905358	0.0914177
SPON2	3735.86	-2.0556e-06	0.0014427	0.000912085	0.0914177
TIMD4	631.131	3.27012	1.798	0.000902057	0.0914177
CRB3	558.872	2.29375e-06	0.0014427	0.000926383	0.0923079
ADH1B	3287.97	2.63318	1.34459	0.000946793	0.093793
KRT18	17477.7	2.10005e-06	0.0014427	0.000975327	0.0960613
LRRN2	1550.56	-3.10139e-06	0.0014427	0.000989482	0.0968953
STEAP1	442.722	-1.92704e-06	0.0014427	0.00100348	0.0977042
CPZ	1938.13	-2.75257e-06	0.0014427	0.00103221	0.0985937
LGR4	2104.3	-2.13304	1.11614	0.00102637	0.0985937
NPHS1	90.4107	3.59927	2.10603	0.00103621	0.0985937
PKP3	1889.18	2.47879e-06	0.0014427	0.00104154	0.0985937
SDS	798.053	-1.6826e-06	0.0014427	0.0010223	0.0985937
CORIN	168.658	-1.7245e-06	0.0014427	0.00106429	0.100191
AHNAK2	20959.6	-2.19796e-06	0.0014427	0.00109897	0.102887
FREM1	407.428	-2.83563e-06	0.0014427	0.0011098	0.103332
P4HA2	2373.51	-2.85626e-06	0.0014427	0.00112864	0.104516
FBN1	58495.2	-2.95518e-06	0.0014427	0.00122577	0.112897
FIBIN	518.114	-2.49449e-06	0.0014427	0.00131368	0.120343
MSR1	6083.4	-1.51468e-06	0.0014427	0.00132534	0.120762
COL19A1	205.905	3.16502	2.08292	0.00134572	0.121967
CMYA5	2328.38	-3.53955e-06	0.0014427	0.00137344	0.122329
CXCR5	496.155	3.08497	1.94842	0.00138561	0.122329
SMN2	163.964	5.85759e-07	0.0014427	0.00138139	0.122329
SPP1	11264	-2.12791e-06	0.0014427	0.00137565	0.122329
TNFRSF11B	655.637	2.77626e-06	0.0014427	0.00136502	0.122329
CD79B	866.902	2.78531	1.76569	0.00141019	0.123857
CCR6	226.549	2.55562	1.52054	0.00141835	0.123935
SIGLEC5	171.894	1.57976e-06	0.0014427	0.00142706	0.12406
DTX1	1199.76	2.66759	1.69383	0.00144218	0.124737
RHPN2	2093.74	3.21472e-06	0.0014427	0.00145535	0.125241
TNNT2	171.508	2.12754e-06	0.0014427	0.00147613	0.125759
ZNF469	8027.21	-2.49915e-06	0.0014427	0.00147398	0.125759
IRX6	104.639	-1.67005e-06	0.0014427	0.00150365	0.127466
MN1	1469.63	-1.91593e-06	0.0014427	0.00151598	0.127875
SCIN	1218.21	-1.08013e-06	0.0014427	0.00153218	0.128605
RGS17	65.126	-1.55442e-06	0.0014427	0.0015451	0.129054
COL6A2	75501.8	-2.06319e-06	0.0014427	0.00155655	0.129376
CD276	15262.2	-1.77809	1.06566	0.00157873	0.129951
LIPA	12385	-2.42022e-06	0.0014427	0.00157534	0.129951
APCDD1L	74.15	-8.75698e-07	0.0014427	0.00160525	0.131499
CETP	516.86	2.49543	1.6428	0.00163219	0.133066
ERBB3	68312.1	2.46805e-06	0.0014427	0.0017114	0.13886
BMP1	6969.86	-3.43057e-06	0.0014427	0.00172055	0.138941
IGSF9	1584.13	2.31347e-06	0.0014427	0.00177984	0.141713
OTOGL	187.745	2.13306e-06	0.0014427	0.00177636	0.141713
VGLL1	983.309	-9.34004e-08	0.0014427	0.00177192	0.141713
PLD3	23136.3	-3.57956e-06	0.0014427	0.00179389	0.142168
FAM83B	351.222	1.12158e-06	0.0014427	0.00184576	0.14493
MGAT3	668.364	1.88505	1.21788	0.00184159	0.14493
ARSI	318.141	-2.75613e-06	0.0014427	0.00185517	0.145001
NOL4	56.7857	1.33863e-06	0.0014427	0.00186568	0.145157
CYP4F11	801.837	1.95415e-06	0.0014427	0.00191005	0.147867
NGEF	146.6	-2.82861	1.87033	0.00192655	0.147867
TMEM125	598.136	2.02059e-06	0.0014427	0.00192222	0.147867
BIRC7	168.85	-1.80031e-06	0.0014427	0.00194557	0.148658
ACHE	262.939	2.07815	1.43466	0.00196228	0.149264
DBNDD1	1013.48	1.52537e-06	0.0014427	0.00200197	0.151029
WNT2	281.693	-1.1214e-06	0.0014427	0.0020032	0.151029
COL6A3	130530	-2.33247e-06	0.0014427	0.00202296	0.151847
MEG3	948.354	-2.05978e-06	0.0014427	0.00205518	0.153589
NTM	1505.56	-2.67539e-06	0.0014427	0.00208606	0.154541
RIMBP2	92.181	-1.31468e-06	0.0014427	0.00208579	0.154541
LOC283710	137.447	2.47124	1.8166	0.00211807	0.156233
STAP1	660.262	2.47719	2.02276	0.0021365	0.156418
XKRX	60.5044	1.42225e-06	0.0014427	0.00213894	0.156418
LUM	19749.9	-2.75228e-06	0.0014427	0.00215599	0.156991
FSTL1	6468.14	-2.81297e-06	0.0014427	0.00218765	0.158619
RGS13	756.242	2.75527	2.71052	0.00219971	0.158817
LINC00473	32.9696	9.71758e-07	0.0014427	0.00223402	0.159939
OSR1	350.476	-1.59971e-06	0.0014427	0.00222752	0.159939
SCGB2A2	140.758	-6.34532e-07	0.0014427	0.00226921	0.161778
ATRNL1	653.869	1.75156e-06	0.0014427	0.00232911	0.165357
SLC22A3	529.328	2.62541	2.59809	0.00234568	0.165842
CYR61	2237.67	-2.40564e-06	0.0014427	0.0023578	0.16601
FCER2	1991.24	8.38252e-07	0.0014427	0.00237575	0.166586
CGN	4502.87	2.02378e-06	0.0014427	0.00242321	0.167162
FCRLA	413.272	2.60048	9.91739	0.00241	0.167162
GPC1	2863.37	-2.81743e-06	0.0014427	0.00239428	0.167162
RAB25	1938.83	1.70059e-06	0.0014427	0.00241416	0.167162
FMO1	415.689	-2.28168e-06	0.0014427	0.00246565	0.167379
MAPK4	125.952	5.5955e-07	0.0014427	0.00246455	0.167379
RALGPS2	3319.55	2.81581e-06	0.0014427	0.00246319	0.167379
XIRP1	107.221	-1.22287e-06	0.0014427	0.00244995	0.167379
MARVELD2	1656.2	2.80298e-06	0.0014427	0.00255432	0.172711
AZU1	66.5149	-1.00824e-06	0.0014427	0.00258068	0.173803
FA2H	282.309	1.7172e-06	0.0014427	0.00260433	0.174305
NLRP4	34.1092	6.6919e-07	0.0014427	0.00262528	0.174305
PCSK1	68.8035	1.53855e-06	0.0014427	0.00262109	0.174305
TERT	191.569	2.17872e-06	0.0014427	0.00262905	0.174305
TMEM144	1223.88	-2.47052e-06	0.0014427	0.00265178	0.17513
SFRP2	19279.4	-1.19831e-06	0.0014427	0.00266625	0.175407
MYBL1	3328.1	1.36863e-06	0.0014427	0.0026922	0.176432
ISM1	409.962	-2.47688e-06	0.0014427	0.00271596	0.176742
PRDM6	374.167	-1.50274e-06	0.0014427	0.00271767	0.176742
LIPH	732.795	2.37095e-06	0.0014427	0.00274168	0.177339
VSIG4	2010.77	-1.61196e-06	0.0014427	0.00274766	0.177339
FOXF1	382.016	2.21116	2.52121	0.00275983	0.177452
ITGB5	8518.75	-2.27655e-06	0.0014427	0.00283551	0.181633
COL6A1	63480.2	-1.63808e-06	0.0014427	0.00285863	0.182428
GSTM1	805.429	5.05565e-07	0.0014427	0.0029579	0.188058
GREB1	16832	-1.73873e-06	0.0014427	0.00297405	0.188195
PRTN3	65.8695	-3.6311e-07	0.0014427	0.00298213	0.188195
CERCAM	6250.67	-1.99796e-06	0.0014427	0.00302475	0.19018
CREB5	1159.06	-2.83177e-06	0.0014427	0.00304473	0.190732
ADAMTS18	177.404	-1.0862e-06	0.0014427	0.00313387	0.194883
PODNL1	416.59	-2.428e-06	0.0014427	0.00312808	0.194883
CTGF	2996.58	-2.21575e-06	0.0014427	0.00320969	0.198872
SSC5D	20783.4	-1.83635e-06	0.0014427	0.00323106	0.199471
NOX4	1439.09	-1.70364e-06	0.0014427	0.00327955	0.201734
XG	383.285	-1.3803e-06	0.0014427	0.00329562	0.201993
PAH	92.9798	-1.28505e-06	0.0014427	0.00341311	0.208444
SH3PXD2B	6149.16	-2.53579e-06	0.0014427	0.0035214	0.214289
LINC01272	966.613	-1.34779e-06	0.0014427	0.00358527	0.2174
IGFN1	274.628	-2.1425e-06	0.0014427	0.00359895	0.217456
EYA2	1522.38	-3.19547e-06	0.0014427	0.0036968	0.222579
SNAI2	1179.8	-2.89476e-06	0.0014427	0.00374972	0.22497
PLXDC2	8852.48	-2.78007e-06	0.0014427	0.00378568	0.226331
MFAP5	224.202	-1.56417e-06	0.0014427	0.00380415	0.22664
EFCAB5	99.4472	1.71581e-06	0.0014427	0.00397131	0.235774
CCDC64B	1328.09	2.30205e-06	0.0014427	0.00408988	0.24197
OLFML3	2270.08	-2.5371e-06	0.0014427	0.0042825	0.25249
GRP	38.01	-3.55571e-07	0.0014427	0.00432928	0.254367
CT83	133.426	-3.94537e-09	0.0014427	0.00437383	0.256102
MIR503HG	186.747	-1.44817e-06	0.0014427	0.00441629	0.257703
ACY3	60.407	9.9177e-07	0.0014427	0.00444776	0.258653
NPY1R	156.944	1.52638e-06	0.0014427	0.00449637	0.260591
KCNJ5	1913.61	-1.60995e-06	0.0014427	0.00451226	0.260625
ASAH1	18266.1	-3.30112e-06	0.0014427	0.00472474	0.271156
C1QTNF6	815.201	-2.52606e-06	0.0014427	0.00474233	0.271156
CCIN	43.6339	-1.22119e-06	0.0014427	0.00473882	0.271156
MMP14	17318.3	-2.77669e-06	0.0014427	0.0048562	0.275071
NPPC	46.201	7.93573e-07	0.0014427	0.00485922	0.275071
PTGFRN	4164.97	-2.93876e-06	0.0014427	0.00484246	0.275071
SOCS6	2419.4	-3.0429e-06	0.0014427	0.00496021	0.279858
COL14A1	22125.7	-1.5304e-06	0.0014427	0.0050373	0.282891
MPO	148.545	-1.34906e-06	0.0014427	0.00505461	0.282891
POTEH	161.652	7.42529e-07	0.0014427	0.00508039	0.282891
S100A7	35.8338	3.71643e-07	0.0014427	0.00507823	0.282891
COL13A1	288.907	-2.00311e-06	0.0014427	0.00510875	0.283095
MARCKSL1	4780.65	2.89765e-06	0.0014427	0.00511728	0.283095
ADAM12	3605.47	-2.00528e-06	0.0014427	0.00516971	0.284152
DNAH8	419.404	1.16686e-06	0.0014427	0.00518642	0.284152
KCNJ11	537.047	1.17127e-06	0.0014427	0.0051755	0.284152
TWIST2	189.665	-2.18072e-06	0.0014427	0.00521868	0.285003
NBPF4	217.258	1.35276e-06	0.0014427	0.00525449	0.286043
FAM216B	44.1941	4.47576e-07	0.0014427	0.00530526	0.287886
CDC42BPG	2409.45	2.8287e-06	0.0014427	0.00537837	0.289092
FMN1	4574.71	-2.70369e-06	0.0014427	0.00535298	0.289092
MS4A1	20317.5	1.05745e-06	0.0014427	0.00536454	0.289092
MIR378I	107.446	1.33369e-06	0.0014427	0.00542939	0.290916
HPGDS	183.947	-1.84999e-06	0.0014427	0.00546684	0.292005
COLCA2	138.118	1.79821e-06	0.0014427	0.00548568	0.292095
ART4	153.01	9.18593e-07	0.0014427	0.00558982	0.296713
BDKRB1	99.0465	-8.19412e-07	0.0014427	0.00566806	0.29889
CXCL17	171.333	6.02368e-07	0.0014427	0.00564861	0.29889
FRMD7	40.3272	-7.17858e-07	0.0014427	0.00568346	0.29889
AICDA	58.3463	8.01087e-07	0.0014427	0.00570283	0.298986
TIMP2	12060	-3.26809e-06	0.0014427	0.00575726	0.300914
FBLN1	14376.6	-2.32511e-06	0.0014427	0.00581349	0.302924
PVRL4	6736.14	1.99661e-06	0.0014427	0.00586408	0.304628
SLC18A2	142.142	-1.31935e-06	0.0014427	0.00589169	0.305132
LAMA1	722.657	-1.9649e-06	0.0014427	0.00590974	0.305139
E2F5	1582.7	2.02766e-06	0.0014427	0.00599972	0.308849
ALOX15B	820.153	-1.51455e-06	0.0014427	0.00609919	0.311634
NTS	26.2613	3.6331e-07	0.0014427	0.00610868	0.311634
PKNOX2	403.467	1.86047e-06	0.0014427	0.00610444	0.311634
CPNE5	802.191	1.85725e-06	0.0014427	0.00615578	0.3131
PPIC	1919.3	-2.34843e-06	0.0014427	0.00624288	0.316585
AQP4	162.791	7.71997e-07	0.0014427	0.00635559	0.317172
FCHO2	8758.85	-2.79564e-06	0.0014427	0.00638476	0.317172
MED12L	603.888	2.3376e-06	0.0014427	0.00632572	0.317172
OLR1	959.737	-9.33346e-07	0.0014427	0.0063096	0.317172
SALL1	89.5735	-7.28062e-07	0.0014427	0.00638213	0.317172
SNX22	623.525	1.81411e-06	0.0014427	0.00635468	0.317172
ZNF804B	26.033	3.40974e-07	0.0014427	0.00637527	0.317172
KIF26B	3807.79	-2.43877e-06	0.0014427	0.00646204	0.320078
AGTR1	275.691	-1.6293e-06	0.0014427	0.00657199	0.32458
PRKG2	220.255	-1.45918e-06	0.0014427	0.0067831	0.334039
STAB2	824.077	1.81179e-06	0.0014427	0.00687771	0.337721
CAMK2B	422.276	7.14632e-07	0.0014427	0.00693315	0.339466
ACP5	7358.26	-1.90182e-06	0.0014427	0.00703447	0.342458
LBP	96.4338	6.1969e-07	0.0014427	0.00702688	0.342458
SUSD4	1382.99	1.42959e-06	0.0014427	0.00726779	0.352809
MYO5B	7211.9	1.42261e-06	0.0014427	0.00730502	0.353609
GABRB2	79.808	-1.03099e-06	0.0014427	0.00738418	0.356088
ORM2	77.2365	8.1531e-07	0.0014427	0.00739805	0.356088
RASAL1	594.024	1.71558e-06	0.0014427	0.00746626	0.358359
ODF3L1	46.5263	-1.1905e-06	0.0014427	0.00750606	0.359258
DLL3	52.1243	1.12592e-06	0.0014427	0.00754679	0.359446
KRT81	9344.91	1.62151e-08	0.0014427	0.00755218	0.359446
ABCA1	18847.1	-2.95436e-06	0.0014427	0.00765635	0.362764
PCOLCE	7856.01	-2.3209e-06	0.0014427	0.00766447	0.362764
SAA2	52.0283	7.21336e-07	0.0014427	0.00768656	0.362801
FHOD3	988.606	-2.06113e-06	0.0014427	0.00780391	0.366631
NRP2	7027.08	-2.96884e-06	0.0014427	0.00781073	0.366631
ZFHX4	4415.43	-2.01145e-06	0.0014427	0.0078663	0.368225
NPFFR1	88.5107	6.2818e-07	0.0014427	0.00789553	0.36858
VAT1	5072.54	-2.70282e-06	0.0014427	0.00793454	0.36939
FAM184B	55.7058	1.01676e-06	0.0014427	0.00797973	0.370481
BACH2	1290.58	2.36411e-06	0.0014427	0.00806201	0.373284
KCNJ12	124.663	-1.48485e-06	0.0014427	0.00818267	0.377844
COMP	8070.2	-1.84117e-06	0.0014427	0.00822382	0.378718
GXYLT2	2556.46	-1.94566e-06	0.0014427	0.00833899	0.381238
MXRA8	3204.17	-2.1894e-06	0.0014427	0.00834567	0.381238
PCDH7	2252.26	-1.79207e-06	0.0014427	0.00834068	0.381238
BANK1	2503.37	1.57511e-06	0.0014427	0.00850646	0.382782
CD248	3670.17	-1.82492e-06	0.0014427	0.00847435	0.382782
GP1BA	870.887	9.02027e-07	0.0014427	0.00852194	0.382782
GPX8	1079.31	-2.21254e-06	0.0014427	0.00856894	0.382782
LGALS2	254.227	1.35284e-06	0.0014427	0.00846117	0.382782
LILRA6	2401.89	-1.65887e-06	0.0014427	0.0084724	0.382782
PDZK1IP1	248.682	6.72947e-07	0.0014427	0.00858166	0.382782
PLD4	409.965	2.10846e-06	0.0014427	0.00854167	0.382782
SERPINF1	9235.69	-2.92083e-06	0.0014427	0.00849725	0.382782
HTRA3	2195.53	-1.35423e-06	0.0014427	0.00863776	0.384279
CYP3A5	142.789	-1.44927e-06	0.0014427	0.00893764	0.39449
EPCAM	36993.7	2.89041e-06	0.0014427	0.00894451	0.39449
GAS1	814.895	-2.6953e-06	0.0014427	0.0088919	0.39449
SPON1	1662.83	-1.2457e-06	0.0014427	0.00895988	0.39449
CD109	3779.63	-1.76125e-06	0.0014427	0.00910668	0.398912
SPOCK1	538.2	-1.63201e-06	0.0014427	0.00910715	0.398912
IGFBP6	445.413	-2.09404e-06	0.0014427	0.0092059	0.402203
FKBP9	7011.26	-2.90791e-06	0.0014427	0.00926849	0.402691
LRRC55	24.7735	8.19538e-07	0.0014427	0.0092537	0.402691
MEGF6	4020.48	-2.37464e-06	0.0014427	0.00928797	0.402691
GGT6	206.5	1.16046e-07	0.0014427	0.00937348	0.404933
OR4M2	101.412	-2.6291e-07	0.0014427	0.00938721	0.404933
COL26A1	40.2862	1.07136e-06	0.0014427	0.00943435	0.405939
FCN3	204.083	1.95261e-06	0.0014427	0.00972182	0.408005
GOLM1	3923.68	-2.50386e-06	0.0014427	0.00970398	0.408005
HMCES	1720.66	2.86371e-06	0.0014427	0.00966323	0.408005
HUNK	457.374	-2.26675e-06	0.0014427	0.0095202	0.408005
NETO1	173.797	-1.0672e-06	0.0014427	0.0095959	0.408005
PASK	2193.69	2.76917e-06	0.0014427	0.00963417	0.408005
PKHD1L1	575.657	1.2084e-06	0.0014427	0.00953966	0.408005
PTGIS	2318.88	-1.8192e-06	0.0014427	0.00967794	0.408005
SDC2	1172.02	-2.23498e-06	0.0014427	0.00968704	0.408005
VTCN1	729.91	6.73769e-07	0.0014427	0.00957637	0.408005
CNN1	476.106	-2.43755e-06	0.0014427	0.00979135	0.408959
RAP1GAP	1243.63	2.56823e-06	0.0014427	0.00979255	0.408959
WT1	200.576	-8.6243e-07	0.0014427	0.00982094	0.409142
GPNMB	341686	-1.47386e-06	0.0014427	0.00992937	0.410647
PHLDA3	1903.35	-2.66119e-06	0.0014427	0.00990461	0.410647
ZNF730	629.356	2.36094e-06	0.0014427	0.00992415	0.410647
MEDAG	428.322	-2.08295e-06	0.0014427	0.0099723	0.411424
CD1A	43.8137	9.01061e-07	0.0014427	0.0100467	0.412441
FAM180A	233.728	-1.52817e-06	0.0014427	0.0100696	0.412441
PTPN3	2390.07	2.34982e-06	0.0014427	0.0100391	0.412441
FRMD6	3262.64	-3.04118e-06	0.00144269	0.0102925	0.420559
C12orf55	614.454	2.38658e-06	0.0014427	0.010447	0.424638
FLG2	121.128	-4.08615e-07	0.0014427	0.0105169	0.424638
FMO2	2265.41	8.007e-07	0.0014427	0.0105146	0.424638
IGDCC4	1519.01	-2.50592e-06	0.0014427	0.0104942	0.424638
ZYG11A	420.749	1.05652e-06	0.0014427	0.0104227	0.424638
CCL11	240.508	-1.20913e-06	0.0014427	0.0106301	0.427752
RORC	557.632	1.34964e-06	0.0014427	0.0106442	0.427752
F2RL2	197.982	-1.29412e-06	0.0014427	0.0107018	0.429056
CDH3	18444.6	1.04819e-06	0.0014427	0.0108008	0.430993
DCN	28872.3	-1.91315e-06	0.0014427	0.010793	0.430993
COL16A1	9416.93	-1.63347e-06	0.0014427	0.0108833	0.433271
ALDH1A3	1524.2	-1.64026e-06	0.0014427	0.0109351	0.433309
MAGEL2	127.177	-1.49726e-06	0.0014427	0.0109106	0.433309
KCNMA1	7941.47	-2.61631e-06	0.0014427	0.0109668	0.433557
NR2F1	2678.5	2.26697e-06	0.0014427	0.0111826	0.441067
CDR2L	806.218	-2.72591e-06	0.00144269	0.0113951	0.448408
LGALS1	9966.95	-1.95289e-06	0.0014427	0.0114401	0.449142
CNKSR1	1247.92	2.76069e-06	0.00144269	0.0114701	0.449285
MAGEA1	196.319	-9.69176e-08	0.0014427	0.0116166	0.452941
PLCH1	1039.97	1.0552e-06	0.0014427	0.0116128	0.452941
CTSK	5708.11	-2.09003e-06	0.0014427	0.0117318	0.456387
CASP14	38.6839	4.14276e-07	0.0014427	0.0117801	0.457222
MTCL1	1623.3	-2.3058e-06	0.0014427	0.0119002	0.460559
TENM1	650.872	-1.5459e-06	0.0014427	0.0119201	0.460559
C14orf37	283.133	-2.0909e-06	0.0014427	0.0120282	0.463683
FZD1	3003.24	-2.01223e-06	0.0014427	0.0120928	0.464627
GPR182	47.2875	1.16724e-06	0.0014427	0.0121345	0.464627
SIX4	894.142	-2.61657e-06	0.00144269	0.0121114	0.464627
AEBP1	53851.5	-2.30715e-06	0.0014427	0.0122669	0.466177
FAM83E	389.214	2.04025e-06	0.00144269	0.0122844	0.466177
GJB2	123.357	-8.58404e-07	0.0014427	0.0122387	0.466177
SGMS2	766.389	-2.31842e-06	0.0014427	0.0122812	0.466177
TJP3	4148.42	2.77884e-06	0.00144269	0.0123137	0.466252
CPQ	2019.88	-2.8248e-06	0.00144269	0.0124146	0.468245
THY1	4139.54	-1.89337e-06	0.0014427	0.0124213	0.468245
LGALS3	9624.31	-1.75462e-06	0.0014427	0.0125036	0.46927
ORM1	248.911	8.77947e-07	0.0014427	0.012489	0.46927
FBXO16	322.263	1.87956e-06	0.0014427	0.0125693	0.469666
LOC653513	39.4506	-9.33893e-07	0.0014427	0.0125566	0.469666
C16orf74	157.223	1.31728e-06	0.0014427	0.0127086	0.473834
SFN	1145.47	1.61432e-06	0.0014427	0.0129034	0.480048
CA12	5513.72	-7.54684e-07	0.0014427	0.0131643	0.48238
DSEL	1166.57	-1.78298e-06	0.0014427	0.0130585	0.48238
KSR2	314.111	1.20052e-06	0.0014427	0.0131585	0.48238
SLC15A2	1638.68	2.21315e-06	0.0014427	0.0130787	0.48238
TGFBI	11468.6	-2.85266e-06	0.00144269	0.0131199	0.48238
TRIM9	181.061	-1.90333e-06	0.0014427	0.0131578	0.48238
UNC13A	110.72	1.40364e-06	0.0014427	0.0130152	0.48238
RYR3	615.157	-1.02901e-06	0.0014427	0.0132063	0.482879
TANC2	11723.6	-2.12422e-06	0.0014427	0.0132817	0.484597
METRNL	3066.37	-2.25869e-06	0.00144269	0.013433	0.488112
MITF	1462.28	-2.14187e-06	0.0014427	0.0134353	0.488112
HEPH	1748.62	-2.39279e-06	0.00144269	0.0135281	0.490436
FCGR1C	373.87	-1.47199e-06	0.0014427	0.0138291	0.499225
PRRG3	108.858	-1.07419e-06	0.0014427	0.0138221	0.499225
ITIH3	196.749	1.50109e-06	0.0014427	0.0138938	0.500499
SLC7A8	1647.03	-2.53314e-06	0.00144269	0.0139846	0.502708
CHST4	78.0321	4.78807e-07	0.0014427	0.0140399	0.503633
PROM1	3856.87	5.04501e-07	0.0014427	0.0142361	0.509599
PRODH	455.976	1.40099e-06	0.0014427	0.0143002	0.51082
C3orf20	88.9649	9.17966e-07	0.0014427	0.0144747	0.511675
CPA3	859.299	-1.28775e-06	0.0014427	0.0145343	0.511675
GATA4	50.1363	6.50998e-07	0.0014427	0.014526	0.511675
LRRC32	2872.3	-2.40952e-06	0.00144269	0.0145148	0.511675
SCG2	122.053	-1.32488e-06	0.0014427	0.0143958	0.511675
SNORD114-10	39.4009	-9.15737e-07	0.0014427	0.0144795	0.511675
TREML2	90.6639	1.07736e-06	0.0014427	0.0144106	0.511675
SERPINH1	6924.86	-2.70527e-06	0.00144269	0.0146289	0.513943
NCCRP1	83.5672	7.10096e-07	0.0014427	0.0146634	0.514095
KEL	372.669	1.35806e-06	0.0014427	0.0147616	0.516464
PITX1	1711.25	1.1685e-06	0.0014427	0.0147916	0.516464
LOC727924	91.1876	-8.26831e-08	0.0014427	0.0149051	0.518302
TP63	315.627	1.73625e-06	0.0014427	0.0148798	0.518302
KRT7	14093.7	4.77395e-07	0.0014427	0.0149518	0.518868
PODN	6588.45	-1.68523e-06	0.0014427	0.0149955	0.519326
IL1RL1	187.413	-1.34949e-06	0.0014427	0.0152062	0.525556
ACOXL	259.008	1.27578e-06	0.0014427	0.0154507	0.52828
ARHGEF4	223.47	-1.7536e-06	0.0014427	0.0156028	0.52828
FAM46A	1174.35	-2.60114e-06	0.00144269	0.0153904	0.52828
FUT3	123.587	6.67557e-07	0.0014427	0.0156571	0.52828
GPR37	281.439	1.29128e-06	0.0014427	0.0156467	0.52828
LILRA2	933.025	-1.91593e-06	0.00144269	0.0155246	0.52828
LRRN1	552.646	-1.51246e-06	0.0014427	0.0154954	0.52828
PAX5	1110.74	7.6775e-07	0.0014427	0.0155664	0.52828
PCDH11Y	86.1029	-1.67638e-08	0.0014427	0.0154563	0.52828
PNPLA3	986.933	-2.20159e-06	0.00144269	0.0156219	0.52828
TMEM45A	789.62	-2.05027e-06	0.00144269	0.0154297	0.52828
WISP1	1013.57	-2.30503e-06	0.00144269	0.015543	0.52828
SLC24A2	68.4485	-6.02696e-07	0.0014427	0.0157092	0.528991
SLITRK6	1410.15	-8.73066e-07	0.0014427	0.0159023	0.534436
BEND6	195.176	-1.88322e-06	0.00144269	0.0159716	0.534657
FRZB	741.603	2.54002e-06	0.00144269	0.0159608	0.534657
CYP19A1	34.4571	-9.64762e-07	0.0014427	0.0160186	0.535179
ZNF750	160.289	1.0489e-06	0.0014427	0.0161084	0.537125
CEBPD	4009.45	-2.51451e-06	0.00144269	0.0162012	0.537603
HOOK1	1523.22	2.36296e-06	0.00144269	0.0161753	0.537603
OLFML2B	5374.81	-1.72912e-06	0.0014427	0.0162174	0.537603
COL8A2	1314.49	-2.61233e-06	0.00144269	0.0163732	0.541716
KLK5	3073.49	-2.76045e-07	0.0014427	0.0166137	0.548607
C1orf210	199.421	1.19176e-06	0.00144269	0.0168287	0.55143
CYP4B1	598.082	9.97709e-07	0.0014427	0.0167733	0.55143
NPTX1	55.6081	8.45582e-07	0.0014427	0.0168117	0.55143
WISP2	1231.69	-8.88878e-07	0.0014427	0.0168033	0.55143
CACNG5	20.6027	4.71082e-07	0.0014427	0.0169076	0.551892
HEXB	14320	-2.41615e-06	0.00144269	0.016883	0.551892
MIR614	567.912	-1.04155e-06	0.0014427	0.0170375	0.553148
MS4A2	131.945	-1.10453e-06	0.0014427	0.0170434	0.553148
PPP4R4	183.948	1.48344e-06	0.0014427	0.017034	0.553148
CLDN3	3520.32	1.97887e-06	0.00144269	0.0172246	0.557151
F7	537.688	-5.72856e-07	0.0014427	0.0172321	0.557151
BICC1	3823.55	-2.50321e-06	0.00144269	0.0175427	0.558358
CACNA2D3	172.094	1.7801e-06	0.00144269	0.0173852	0.558358
CYP27A1	6156.99	-1.46719e-06	0.0014427	0.0175423	0.558358
FCRL2	538.973	7.50761e-07	0.0014427	0.0175511	0.558358
GRAPL	78.969	1.3522e-06	0.0014427	0.0173714	0.558358
KCNK12	41.555	5.52783e-07	0.0014427	0.0175331	0.558358
OR13A1	22.3276	6.35582e-07	0.0014427	0.0175129	0.558358
SCGB3A1	519.325	1.73769e-06	0.0014427	0.0173577	0.558358
TSHZ3	2111.03	-2.23373e-06	0.00144269	0.0175644	0.558358
ANKRD65	186.274	1.43971e-06	0.0014427	0.0177318	0.561583
CACNA1B	144.476	-8.31611e-07	0.0014427	0.0177046	0.561583
PDZRN4	199.82	-9.84114e-07	0.0014427	0.0179587	0.567716
COL12A1	50698.9	-1.38417e-06	0.0014427	0.0180541	0.568621
SPIB	1252.13	1.00091e-06	0.0014427	0.0180339	0.568621
NPAS1	89.4797	1.34861e-06	0.0014427	0.0181019	0.569075
CMBL	1307.8	-2.4326e-06	0.00144269	0.0183016	0.573065
EVA1A	131.917	-1.79065e-06	0.00144269	0.0183708	0.573065
GRIA3	319.949	-2.17543e-06	0.00144269	0.0184157	0.573065
MOGAT2	111.058	6.80101e-07	0.0014427	0.0183212	0.573065
MYO18B	107.075	1.38735e-06	0.0014427	0.0183619	0.573065
TACSTD2	5251.46	1.24984e-06	0.0014427	0.0184306	0.573065
AKR1B15	50.9434	2.71543e-07	0.0014427	0.0185106	0.57385
CLEC11A	889.967	-2.291e-06	0.00144269	0.0185232	0.57385
FFAR4	159.869	-1.21164e-06	0.0014427	0.0186178	0.575731
EPHB3	3466.47	-2.1406e-06	0.00144269	0.0189038	0.580365
KCNA1	57.3037	-8.6965e-07	0.0014427	0.0188778	0.580365
TLR10	1521.38	1.11168e-06	0.0014427	0.01885	0.580365
VPREB3	282.894	6.82171e-07	0.0014427	0.0188047	0.580365
CNTN2	23.437	7.2353e-07	0.0014427	0.0190138	0.580602
NALCN	1020.15	-1.45298e-06	0.0014427	0.0189715	0.580602
UGT2B17	84.5684	7.90412e-07	0.0014427	0.0189982	0.580602
RASSF6	192.398	1.6302e-06	0.00144269	0.0190601	0.580975
SFTPC	16814.7	1.41717e-06	0.00144269	0.0191279	0.581999
BTC	188.102	1.24798e-06	0.0014427	0.0191917	0.582901
SNX29P1	236.778	1.95827e-06	0.00144269	0.0192376	0.583255
CD9	7759.37	-2.08096e-06	0.00144269	0.0193006	0.584127
ALK	987.502	-9.0439e-07	0.0014427	0.0195368	0.589753
HCFC1R1	1533.1	-2.65017e-06	0.00144269	0.0195763	0.589753
SLC38A6	2928.44	-1.99948e-06	0.00144269	0.0195904	0.589753
CDK5R1	410.073	1.77532e-06	0.00144269	0.0198256	0.595783
TPSB2	569.808	-1.18001e-06	0.0014427	0.019902	0.597023
NBPF6	239.703	1.11125e-06	0.0014427	0.0199598	0.597707
AMPH	258.779	-9.82717e-07	0.0014427	0.0200609	0.599679
SMOC2	3060.16	-2.33863e-06	0.00144269	0.0201237	0.600503
LOC101928871	340.964	2.23048e-06	0.00144269	0.0202254	0.602485
XDH	188.48	1.298e-06	0.0014427	0.0203174	0.604169
ISLR	7006.09	-1.68745e-06	0.00144269	0.0203542	0.604208
TPPP3	776.922	-1.36406e-06	0.0014427	0.0205286	0.608325
RASGRP2	1515.82	2.43052e-06	0.00144269	0.0205996	0.609369
ATAD3C	483.849	1.7945e-06	0.00144269	0.0214062	0.632131
RAB17	556.234	1.46855e-06	0.00144269	0.021511	0.633032
SLC29A2	1224.84	2.6703e-06	0.00144269	0.0214805	0.633032
TAS1R3	172.293	1.80195e-06	0.00144269	0.021556	0.633263
CD1C	304.495	1.61749e-06	0.00144269	0.0217736	0.635503
CDH13	821.375	-1.59371e-06	0.00144269	0.0217814	0.635503
LEMD1	257.725	2.46322e-08	0.0014427	0.0217066	0.635503
OCA2	98.3874	5.03507e-07	0.0014427	0.0217695	0.635503
NCAM2	564.071	-1.46976e-06	0.00144269	0.0218846	0.637423
MUSK	103.026	6.71462e-07	0.0014427	0.0219565	0.638425
STEAP2	719.012	-2.16152e-06	0.00144269	0.0220328	0.639551
CD79A	2700.53	8.33228e-07	0.0014427	0.0221532	0.641954
BOC	2573.74	-2.64601e-06	0.00144269	0.0222271	0.643001
NOS2	151.777	1.57869e-06	0.00144269	0.0222917	0.643777
C3orf80	43.4411	-7.55066e-07	0.0014427	0.0223348	0.643929
NPB	28.5952	8.73532e-07	0.0014427	0.022558	0.649265
EPYC	46.6576	-5.05938e-07	0.0014427	0.0226271	0.64943
GLRB	191.574	-1.9421e-06	0.00144269	0.0227543	0.64943
MYBL2	5493.75	1.24453e-06	0.0014427	0.0227095	0.64943
NID2	4144.08	-2.24397e-06	0.00144269	0.0227198	0.64943
ZNF296	544.392	2.05304e-06	0.00144269	0.0226618	0.64943
STRBP	6123.36	2.20416e-06	0.00144269	0.0227944	0.649488
EPPK1	26809.4	1.03293e-06	0.0014427	0.0229381	0.651445
MMP16	516.813	-1.55079e-06	0.00144269	0.0229396	0.651445
UGT2B15	114.425	4.19331e-07	0.0014427	0.023134	0.655874
XKR4	31.265	6.19994e-07	0.0014427	0.0231838	0.656193
EMILIN2	3166.2	-1.56359e-06	0.00144269	0.0232424	0.656761
LGR5	117.634	-9.53469e-07	0.0014427	0.0235776	0.66513
RAMP1	710.142	1.08039e-06	0.0014427	0.0237421	0.668663
SGCD	599.988	-1.6146e-06	0.00144269	0.0238162	0.669645
THBS3	3770.1	-1.95171e-06	0.00144269	0.0238714	0.670091
HSD17B2	54.9284	4.76591e-07	0.0014427	0.0240325	0.673502
SNAP91	72.6935	8.67953e-07	0.0014427	0.0241439	0.675515
EFEMP2	3259.93	-2.57296e-06	0.00144269	0.0245316	0.684113
TNN	134.555	-1.51165e-06	0.00144269	0.0245213	0.684113
SLC44A5	104.734	8.99967e-07	0.0014427	0.0246606	0.686589
PLBD1	3149.61	-1.51654e-06	0.00144269	0.02488	0.691566
TEKT4P2	290.406	-1.70415e-06	0.00144269	0.025025	0.694464
TCF7	1794.36	1.3508e-06	0.00144269	0.0252939	0.700785
C9orf152	357.816	8.30515e-07	0.0014427	0.0253527	0.701274
KCNE1	288.868	-1.27153e-06	0.00144269	0.0255916	0.706734
GSG2	286.265	1.97338e-06	0.00144269	0.0257132	0.708943
ADAM9	12552.1	-2.62422e-06	0.00144269	0.0258488	0.711531
LRMP	3874.89	1.28938e-06	0.0014427	0.0259742	0.71383
CADM3	303.843	1.27415e-06	0.0014427	0.0261519	0.717356
COL9A3	262.958	8.78794e-07	0.0014427	0.0261867	0.717356
ETV1	665.239	-2.44923e-06	0.00144269	0.0263242	0.719965
RPLP0P2	159.335	-1.22414e-06	0.0014427	0.0264054	0.721029
CSPG4	3096.27	-2.25891e-06	0.00144269	0.0265325	0.723341
AXL	42478	-2.33792e-06	0.00144269	0.0266392	0.723931
F2RL3	111.544	1.48848e-06	0.00144269	0.0266126	0.723931
HTR1B	21.7433	-7.43657e-07	0.0014427	0.0268032	0.727228
FCGR2A	8147.93	-1.69967e-06	0.00144269	0.0268723	0.727555
PFKFB3	10785.3	-1.9979e-06	0.00144269	0.0269006	0.727555
KRT17	490.02	6.96376e-07	0.0014427	0.0272068	0.73467
TLN2	2903.35	-2.28697e-06	0.00144269	0.0276445	0.745307
COPZ2	399.656	-2.01677e-06	0.00144269	0.0277487	0.746936
KLRG2	626.453	8.07671e-07	0.00144269	0.0278232	0.747759
LMO3	162.218	-1.10522e-06	0.0014427	0.027997	0.750063
NREP	392.768	-1.93549e-06	0.00144269	0.0279628	0.750063
BDKRB2	348.601	-1.16266e-06	0.0014427	0.0281013	0.751676
PPFIA2	370.09	-9.92304e-07	0.0014427	0.028262	0.754791
DUSP26	21.1818	7.29635e-07	0.0014427	0.0284501	0.757687
SPIRE1	2850.16	-2.48079e-06	0.00144269	0.0284594	0.757687
MMP28	211.931	-1.8575e-06	0.00144269	0.0285261	0.757822
RCN3	2691	-1.77425e-06	0.00144269	0.0285534	0.757822
RNF130	9139.96	-2.10727e-06	0.00144269	0.0286035	0.757823
ROPN1	233.372	3.76593e-08	0.0014427	0.0286424	0.757823
CYFIP1	18233.2	-2.23098e-06	0.00144269	0.0289009	0.761796
FAM81A	141.075	1.61973e-06	0.00144269	0.0290161	0.761796
KRT2	32.1658	3.88538e-07	0.0014427	0.029008	0.761796
PLAC8	644.45	1.21673e-06	0.00144269	0.0289471	0.761796
ZNF860	1544.58	1.2612e-06	0.00144269	0.0289249	0.761796
TBC1D2	2734.56	-2.46386e-06	0.00144269	0.0291049	0.762951
CPED1	3349.73	-2.69943e-06	0.00144269	0.0292365	0.764464
SEMA3B	1936.35	-1.14061e-06	0.0014427	0.0292523	0.764464
ALOX15	272.902	9.0202e-07	0.0014427	0.0293584	0.766062
FAM92B	48.2475	9.82336e-07	0.0014427	0.0294239	0.766596
DPYSL3	5513.09	-2.24903e-06	0.00144269	0.0295915	0.769785
PAX1	22.0442	-3.30084e-07	0.0014427	0.0296868	0.771088
CPB1	305.777	-6.53586e-07	0.0014427	0.0297776	0.771096
HIC1	2545.12	-2.63599e-06	0.00144269	0.0297767	0.771096
FAM65B	2787.23	1.64309e-06	0.00144269	0.0301218	0.77712
PTPRH	157.642	-1.5639e-06	0.00144269	0.0301471	0.77712
TMEM139	306.628	1.25561e-06	0.00144269	0.0301467	0.77712
GPR12	118.271	-7.11342e-08	0.0014427	0.0304242	0.78308
TSPAN7	674.774	2.28736e-06	0.00144269	0.0304848	0.783456
CNR2	117.119	9.7344e-07	0.0014427	0.0306581	0.78495
GPR64	593.759	8.80445e-07	0.0014427	0.0306759	0.78495
IRF6	3601.17	8.69545e-07	0.0014427	0.0306812	0.78495
DNM1	4675.22	-1.92741e-06	0.00144269	0.0308194	0.786124
DYSF	12431.9	-1.58497e-06	0.00144269	0.0307932	0.786124
CCR7	709.966	1.31879e-06	0.00144269	0.030942	0.786896
SYT8	159.315	5.02561e-07	0.0014427	0.0309005	0.786896
OR4N4	123.522	2.1974e-07	0.0014427	0.0309981	0.787147
GLP1R	33.0824	4.93974e-07	0.0014427	0.0310906	0.788322
BSPRY	1000.63	1.58745e-06	0.00144269	0.0313884	0.794691
HMOX1	2496.69	-1.45419e-06	0.00144269	0.0314742	0.79568
GRIA4	21.4106	3.98717e-07	0.0014427	0.0315565	0.796579
CPXM2	1483.76	-1.94474e-06	0.00144269	0.0316306	0.797269
SNORD113-2	21.3417	-5.91764e-07	0.0014427	0.0317454	0.798981
TTC9	578.368	2.16032e-06	0.00144269	0.0319089	0.801912
CRISPLD2	2544.97	-1.78918e-06	0.00144269	0.0320978	0.805471
PSAP	78063.8	-1.76369e-06	0.00144269	0.0322183	0.806459
SHCBP1	1235.98	2.41642e-06	0.00144269	0.0322318	0.806459
TNS4	275.063	1.1854e-06	0.00144269	0.0323613	0.80851
HTR2A	44.952	-5.78556e-07	0.0014427	0.0324932	0.809432
SORCS2	619.956	-1.72759e-06	0.00144269	0.0324702	0.809432
CSDC2	50.7288	-9.41804e-07	0.0014427	0.0325481	0.809616
APOC1	9702.73	-1.02434e-06	0.0014427	0.0327585	0.812733
DUOX2	129.068	-1.39594e-06	0.00144269	0.0328165	0.812733
ZNF812	83.6448	-1.20632e-06	0.00144269	0.0328058	0.812733
EAF2	1527.83	1.43515e-06	0.00144269	0.0328712	0.812907
CYP4Z1	223.026	6.68086e-07	0.0014427	0.0329833	0.814497
CCDC102B	2724.84	1.95966e-06	0.00144269	0.0330808	0.814822
FAM151A	30.8319	6.74954e-07	0.0014427	0.03314	0.814822
SERPINB7	21.0686	3.07386e-07	0.0014427	0.0331328	0.814822
GLIS1	124.863	-1.15322e-06	0.00144269	0.033231	0.815883
RCOR2	356.581	-1.26631e-06	0.00144269	0.0333679	0.818066
SFTPA1	10399.6	1.45493e-06	0.00144269	0.0334286	0.818377
BCAS4	951.477	1.68097e-06	0.00144269	0.0338607	0.820187
CRABP1	814.488	3.55875e-08	0.0014427	0.0338436	0.820187
FTL	193984	-1.54782e-06	0.00144269	0.0339153	0.820187
G0S2	186.33	1.43621e-06	0.00144269	0.0338191	0.820187
GHRL	77.0308	1.43065e-06	0.00144269	0.033622	0.820187
GLDN	210.123	-1.32937e-06	0.00144269	0.0339839	0.820187
LEPREL2	1179.65	-1.80224e-06	0.00144269	0.0339793	0.820187
MS4A7	4119.06	-1.49831e-06	0.00144269	0.0338956	0.820187
RNASE1	4353.23	-2.38166e-06	0.00144269	0.0339429	0.820187
ST6GAL2	392.552	-1.81979e-06	0.00144269	0.0337501	0.820187
BACE1	973.826	-2.43697e-06	0.00144269	0.0340333	0.820216
FKBP9P1	482.139	-2.1648e-06	0.00144269	0.0344307	0.826288
SMIM22	574.405	1.2778e-06	0.00144269	0.0343892	0.826288
STAB1	16961.7	-2.50989e-06	0.00144269	0.0344196	0.826288
GAREM	914.073	-1.79057e-06	0.00144269	0.0346883	0.8313
CYP2A6	1560.79	2.20683e-08	0.0014427	0.0348929	0.835029
SERPINE1	3888.14	-1.77001e-06	0.00144269	0.0350381	0.837328
CDR1	61.4968	-9.34831e-07	0.0014427	0.0351065	0.83734
PLTP	5620.21	-2.03158e-06	0.00144269	0.0351369	0.83734
MGLL	3664	-1.53204e-06	0.00144269	0.0352093	0.837893
SORT1	5627.84	-2.26794e-06	0.00144269	0.0353058	0.839018
SPIC	142.131	8.88737e-07	0.0014427	0.0354967	0.841207
TFAP2B	705.537	-7.56025e-07	0.00144269	0.035453	0.841207
ELN	3172.43	-1.45562e-06	0.00144269	0.0355782	0.841967
TMEM26	230.644	-1.27725e-06	0.00144269	0.0358007	0.84606
ILDR1	476.826	1.98995e-06	0.00144269	0.0359719	0.847754
SLC22A31	181.683	1.70643e-06	0.00144269	0.0359705	0.847754
SYT13	254.868	-1.09455e-06	0.00144269	0.0360533	0.848497
TFPI2	107.097	1.0318e-06	0.00144269	0.0362155	0.851139
PMP22	2696.4	-2.48889e-06	0.00144269	0.0363358	0.851861
VMO1	199.551	-1.23899e-06	0.00144269	0.0363462	0.851861
COL5A3	2799.07	-1.30963e-06	0.00144269	0.0364352	0.852773
P2RY1	228.136	-1.64318e-06	0.00144269	0.0365972	0.853109
SCGB1D2	40.2078	-6.06034e-07	0.0014427	0.0365528	0.853109
SCGB2A1	41.5804	-4.47296e-07	0.0014427	0.0365997	0.853109
HKDC1	54.8596	1.06457e-06	0.00144269	0.0366807	0.853828
LCA5L	184.107	-1.69569e-06	0.00144269	0.036927	0.856623
PNMAL1	161.741	-1.21149e-06	0.00144269	0.03693	0.856623
TNXB	27288.8	-1.35236e-06	0.00144269	0.0369516	0.856623
CBFA2T3	1261.11	1.84151e-06	0.00144269	0.0370745	0.858305
ADAMTSL2	2239.53	1.04668e-06	0.00144269	0.037274	0.860697
BMS1P20	2263.84	2.44711e-06	0.00144269	0.0375314	0.860697
C12orf42	56.856	8.55525e-07	0.0014427	0.0373953	0.860697
C8orf34	82.5677	-4.64688e-07	0.0014427	0.0373672	0.860697
CKMT1B	286.528	1.15789e-06	0.00144269	0.0375045	0.860697
CRB2	124.844	8.14068e-07	0.0014427	0.0375105	0.860697
WWC1	4816.31	1.62228e-06	0.00144269	0.0374364	0.860697
ARMC9	1833.67	-1.69139e-06	0.00144269	0.0376554	0.86238
ABCC5	9839.6	-1.93045e-06	0.00144269	0.0379163	0.863712
GABRP	1103.96	4.73144e-07	0.0014427	0.0378584	0.863712
GJB3	89.3029	7.24012e-07	0.0014427	0.0378533	0.863712
KRTAP5-1	52.191	5.13942e-07	0.0014427	0.0378802	0.863712
PNMA2	245.911	-1.45044e-06	0.00144269	0.0380084	0.864654
KCNS3	1869.12	-1.52871e-06	0.00144269	0.0381204	0.866044
SIRPB2	640.118	-1.17983e-06	0.00144269	0.0382121	0.866972
SLC7A10	45.8545	5.70644e-07	0.0014427	0.0384167	0.869402
TXNDC5	277.257	1.93506e-06	0.00144269	0.0384213	0.869402
CRISPLD1	477.125	-1.40615e-06	0.00144269	0.0385282	0.870667
CDH15	57.7994	6.57184e-07	0.0014427	0.0385855	0.870806
JUN	4998	-2.16711e-06	0.00144269	0.0387747	0.872064
PLOD2	6742.75	-2.25193e-06	0.00144269	0.0387386	0.872064
TAS2R41	22.4302	7.0024e-07	0.0014427	0.0387948	0.872064
GBP7	63.7889	-6.0294e-07	0.0014427	0.0391904	0.878638
SREBF2	12832.5	2.59416e-06	0.00144269	0.0391903	0.878638
ARHGEF16	1507.41	1.5741e-06	0.00144269	0.0393098	0.880158
HIP1R	3259.67	2.27589e-06	0.00144269	0.0395246	0.883806
ALDH1L2	1694.69	-2.4279e-06	0.00144269	0.0395921	0.88404
C6	145.671	1.11162e-06	0.00144269	0.0396389	0.88404
FHAD1	763.214	-1.83703e-06	0.00144269	0.0398159	0.886827
CDK1	2479.63	2.05999e-06	0.00144269	0.0399272	0.888145
MARVELD1	963.353	-2.19469e-06	0.00144269	0.040093	0.890671
TLR9	551.608	1.40526e-06	0.00144269	0.0402057	0.892011
DPEP1	116.195	1.54874e-06	0.00144269	0.0402598	0.89205
ADAMTS14	1954.41	-1.31976e-06	0.00144269	0.0407173	0.896776
CC2D2A	1650.94	-2.36394e-06	0.00144269	0.0407078	0.896776
CHI3L2	1413.45	6.62823e-07	0.0014427	0.0409467	0.896776
DFNA5	637.922	-2.13492e-06	0.00144269	0.0407863	0.896776
FCGR1A	1811.06	-9.73349e-07	0.00144269	0.0409234	0.896776
GALNT15	337.004	-1.35276e-06	0.00144269	0.0408075	0.896776
LMX1B	1298.7	-8.84004e-07	0.0014427	0.0407568	0.896776
PDGFC	1833.81	-2.42542e-06	0.00144269	0.040749	0.896776
RNF150	551.741	1.58486e-06	0.00144269	0.0409024	0.896776
SLC29A3	3188.98	-1.70546e-06	0.00144269	0.0410032	0.896859
CCL8	623.387	-9.08089e-07	0.0014427	0.041142	0.89695
FRMD5	131.399	-8.97965e-07	0.0014427	0.0410801	0.89695
GSDMA	66.872	1.01384e-06	0.00144269	0.0411653	0.89695
LAMA4	13016.4	-2.5229e-06	0.00144269	0.0412815	0.897794
ZNF488	24.3874	-4.58236e-07	0.0014427	0.0413094	0.897794
LRRC4B	285.367	1.76959e-06	0.00144269	0.0415143	0.901098
ADCY2	497.893	-8.77942e-07	0.0014427	0.0416042	0.901901
TCF21	528.409	-1.38514e-06	0.00144269	0.041859	0.90512
TFCP2L1	1917.67	-1.21181e-06	0.00144269	0.0418062	0.90512
GAPT	380.889	1.36861e-06	0.00144269	0.0422833	0.913136
PPP1R9A	2585.05	1.02472e-06	0.00144269	0.0425284	0.917267
APOE	43475.8	-1.20119e-06	0.00144269	0.0427312	0.918154
MAFB	5935.04	-1.68148e-06	0.00144269	0.0426719	0.918154
SFTPB	11374.5	1.15172e-06	0.00144269	0.0427123	0.918154
B3GNT7	625.394	-1.95947e-06	0.00144269	0.0428717	0.919392
TMEM98	879.692	-1.76343e-06	0.00144269	0.0429915	0.919392
TPD52	5830.2	1.67737e-06	0.00144269	0.0429372	0.919392
TPRG1	333.481	-1.65212e-06	0.00144269	0.0430046	0.919392
BLK	711.894	9.20419e-07	0.0014427	0.0431464	0.921268
PTGDS	9753.25	1.07412e-06	0.00144269	0.0432451	0.922219
CTSB	63372.5	-1.20985e-06	0.00144269	0.0436808	0.927171
DIO2	199.89	-8.05718e-07	0.0014427	0.0437115	0.927171
GPR55	46.9985	8.84303e-07	0.0014427	0.0437787	0.927171
GRIK5	293.566	1.14157e-06	0.00144269	0.0436029	0.927171
HNF1B	102.075	8.40713e-07	0.00144269	0.0435646	0.927171
SFRP4	4459.32	-1.61653e-06	0.00144269	0.0438038	0.927171
FRRS1	1260.96	-2.20913e-06	0.00144269	0.0439214	0.928507
E2F1	1016.04	2.01652e-06	0.00144269	0.0440276	0.929598
AGPAT4	558.18	-1.675e-06	0.00144269	0.0441798	0.93042
HR	944.47	1.84477e-06	0.00144269	0.0441667	0.93042
PPL	4178.74	-9.42207e-07	0.00144269	0.0442303	0.93042
LINGO4	22.6552	5.12212e-07	0.0014427	0.0443659	0.932121
FCGR2B	1554.59	-1.34601e-06	0.00144269	0.0446348	0.934483
GREM1	660.56	-1.83526e-06	0.00144269	0.0446717	0.934483
MAP1A	4726.06	-1.81016e-06	0.00144269	0.0446377	0.934483
TNNT1	820.089	-9.35421e-07	0.00144269	0.0446977	0.934483
KIAA1045	33.1164	6.2643e-07	0.0014427	0.0450136	0.939934
MMP8	23.5913	-3.92171e-07	0.0014427	0.0450891	0.940359
CCDC36	350.99	-1.76957e-06	0.00144269	0.0453445	0.943377
PRSS22	456.989	1.00453e-06	0.00144269	0.0453333	0.943377
CDCP1	1984.22	-1.68997e-06	0.00144269	0.0454424	0.94426
GRIA1	145.038	-5.40189e-07	0.0014427	0.0455869	0.944957
SAMD12	1772.29	1.32318e-06	0.00144269	0.0455787	0.944957
ALOX15P1	59.2676	1.19164e-06	0.00144269	0.0458778	0.946505
C2orf54	92.9122	5.94852e-07	0.0014427	0.0462864	0.946505
CFHR1	41.3549	5.56762e-07	0.0014427	0.0463281	0.946505
CTSZ	35768.2	-1.46935e-06	0.00144269	0.0460831	0.946505
CXADR	1084.32	1.60593e-06	0.00144269	0.0461109	0.946505
FAM201A	59.9234	1.11556e-06	0.00144269	0.0459638	0.946505
FTH1	91055.1	-2.28003e-06	0.00144269	0.0459973	0.946505
MTL5	888.928	2.22714e-06	0.00144269	0.0462731	0.946505
PLOD1	7645.51	-2.02348e-06	0.00144269	0.0460833	0.946505
RASA4B	714.257	-1.93125e-06	0.00144269	0.0462601	0.946505
RASSF10	90.3325	1.16528e-06	0.00144269	0.0461624	0.946505
SULT1B1	47.3891	8.88265e-07	0.00144269	0.0463232	0.946505
EDA2R	188.586	-1.43342e-06	0.00144269	0.0464507	0.946738
IQGAP2	12886.8	-1.94223e-06	0.00144269	0.0464078	0.946738
DEPDC1	926.899	1.66984e-06	0.00144269	0.0465102	0.94682
DERL3	982.319	2.19817e-06	0.00144269	0.0466403	0.948301
DHCR24	10431.2	1.34989e-06	0.00144269	0.0466943	0.948301
ABCB5	229.687	-7.30373e-07	0.0014427	0.0476193	0.94903
B3GNT8	488.703	-1.41616e-06	0.00144269	0.0473971	0.94903
C14orf132	130.804	-1.17515e-06	0.00144269	0.0472938	0.94903
CDH7	78.211	1.94569e-08	0.0014427	0.0472792	0.94903
FAM111B	1262.68	2.15748e-06	0.00144269	0.0467976	0.94903
FKBP7	583.477	-1.85112e-06	0.00144269	0.0472353	0.94903
FRMPD1	115.055	7.14626e-07	0.0014427	0.0471729	0.94903
HOXC13	250.269	9.51466e-07	0.00144269	0.0473787	0.94903
HSD3B7	1372.06	-1.83537e-06	0.00144269	0.047026	0.94903
HSPA12B	831.883	-1.91538e-06	0.00144269	0.0471831	0.94903
NTNG1	90.8094	9.63511e-07	0.00144269	0.0468521	0.94903
NWD1	214.479	4.90273e-07	0.0014427	0.0475982	0.94903
SH2B2	807.423	1.39871e-06	0.00144269	0.0476214	0.94903
SLC11A1	2768.05	-1.76588e-06	0.00144269	0.0470865	0.94903
TMEM163	102.736	9.51446e-07	0.00144269	0.0475879	0.94903
TYROBP	5757.5	-1.33657e-06	0.00144269	0.047545	0.94903
FGFR4	3436.61	1.12042e-06	0.00144269	0.047785	0.951179
EGFL6	460.62	-1.0782e-06	0.00144269	0.0480818	0.954854
GRM5	27.9361	-6.69844e-07	0.0014427	0.0480635	0.954854
RIPK4	830.872	2.01851e-06	0.00144269	0.0486224	0.963345
SGIP1	1236.63	-1.46901e-06	0.00144269	0.0486157	0.963345
LCNL1	110.039	1.2042e-06	0.00144269	0.0486972	0.963707
GAS7	3201.31	-2.3202e-06	0.00144269	0.0490885	0.970323
ARHGAP28	1007.91	-1.33374e-06	0.00144269	0.049149	0.970393
LAMC2	1994.43	5.00007e-07	0.0014427	0.0492904	0.97206
LRFN5	101.445	-1.11299e-06	0.00144269	0.0495219	0.9746
TUBA1A	11618.4	-2.4146e-06	0.00144269	0.0495336	0.9746
GPRIN2	544.592	4.67301e-07	0.0014427	0.0496025	0.974829
MEI1	563.794	1.60687e-06	0.00144269	0.0496943	0.975509
FAM114A1	4719.35	-2.39721e-06	0.00144269	0.0498351	0.976024
IGFBP4	6332.31	-2.0475e-06	0.00144269	0.0497918	0.976024
CAPN14	39.2365	7.54921e-07	0.0014427	0.0500066	0.977044
COLEC12	2747.75	-2.09538e-06	0.00144269	0.0499632	0.977044
TWIST1	300.277	-1.4105e-06	0.00144269	0.0500592	0.977044
EML6	459.16	1.34034e-06	0.00144269	0.0502424	0.979496
FSCN2	388.072	1.63052e-06	0.00144269	0.0504113	0.981666
HTR3A	62.6172	4.85744e-07	0.0014427	0.0505639	0.983515
LRRC8E	751.006	-1.78087e-06	0.00144269	0.0507826	0.985332
PTPN20B	115.904	1.15724e-06	0.00144269	0.0508075	0.985332
SLC23A1	114.069	7.89214e-07	0.0014427	0.0508309	0.985332
CPM	3772.81	-1.39235e-06	0.00144269	0.0512444	0.991232
IGF2BP3	208.719	1.09196e-06	0.00144269	0.0512515	0.991232
SCN2B	34.4259	-5.94641e-07	0.0014427	0.0514073	0.993117
ZNF165	212.047	1.31337e-06	0.00144269	0.0515329	0.994416
RGS4	162.348	-1.38515e-06	0.00144269	0.0516139	0.994853
FOXG1	23.4158	4.56543e-07	0.0014427	0.051714	0.995655
PNOC	103.456	8.37736e-07	0.0014427	0.0517835	0.995869
HPR	27.2249	3.36473e-07	0.0014427	0.0520475	0.998691
SHISA4	548.23	-2.06025e-06	0.00144269	0.0520442	0.998691
A1BG	285.63	3.17846e-07	0.00144269	0.774816	0.999991
A1BG-AS1	471.076	-1.71092e-07	0.00144269	0.864531	0.999991
A1CF	20.6314	-2.25784e-08	0.0014427	0.972189	0.999991
A2M	58697.8	-1.0797e-06	0.00144269	0.22797	0.999991
A2M-AS1	102.631	1.83364e-07	0.00144269	0.805304	0.999991
A2ML1	212.496	1.22543e-07	0.00144269	0.724703	0.999991
A4GALT	1560.19	2.05331e-07	0.00144269	0.862812	0.999991
AAAS	1743.81	-1.23912e-07	0.00144269	0.917076	0.999991
AACS	1361.07	6.2413e-07	0.00144269	0.611853	0.999991
AADAC	39.231	-5.34679e-07	0.00144269	0.213566	0.999991
AADAT	372.018	-7.88597e-07	0.00144269	0.310015	0.999991
AAED1	943.818	-1.20052e-06	0.00144269	0.287399	0.999991
AAGAB	2414.12	-1.11222e-07	0.00144269	0.920526	0.999991
AAK1	7057.41	-6.21405e-07	0.00144269	0.645152	0.999991
AAMDC	330.427	-6.16798e-08	0.00144269	0.947727	0.999991
AAMP	2809.4	-2.49175e-07	0.00144269	0.850834	0.999991
AAR2	1163.06	9.83266e-08	0.00144269	0.934995	0.999991
AARD	846.492	4.03839e-07	0.00144269	0.266336	0.999991
AARS	8084.07	-8.65484e-10	0.00144269	0.998523	0.999991
AARS2	2124.54	3.721e-07	0.00144269	0.778158	0.999991
AASDH	2276.44	1.60541e-07	0.00144269	0.889807	0.999991
AASDHPPT	1208.66	1.26809e-07	0.00144269	0.917294	0.999991
AASS	1663.71	2.84179e-08	0.00144269	0.97694	0.999991
AATF	2961.27	4.63273e-07	0.00144269	0.706994	0.999991
AATK	991.251	7.73952e-07	0.00144269	0.139981	0.999991
ABAT	772.244	2.89876e-07	0.00144269	0.751103	0.999991
ABCA10	1420.23	-8.15449e-08	0.00144269	0.923984	0.999991
ABCA11P	612.605	6.73758e-07	0.00144269	0.489358	0.999991
ABCA12	776.997	5.51753e-07	0.00144269	0.158846	0.999991
ABCA13	658.147	-8.68957e-07	0.00144269	0.0615177	0.999991
ABCA2	16614.2	-6.59217e-07	0.00144269	0.457595	0.999991
ABCA3	6264.99	1.27373e-06	0.00144269	0.264181	0.999991
ABCA4	165.293	5.28337e-07	0.00144269	0.474673	0.999991
ABCA5	3399.36	6.28685e-07	0.00144269	0.567453	0.999991
ABCA6	3963.26	4.19457e-07	0.00144269	0.614459	0.999991
ABCA7	5936.18	8.18275e-07	0.00144269	0.503241	0.999991
ABCA8	1935.99	-9.64961e-07	0.00144269	0.194486	0.999991
ABCA9	2019.51	-2.87203e-07	0.00144269	0.734717	0.999991
ABCB1	1254.49	-3.63105e-07	0.00144269	0.664206	0.999991
ABCB10	2064.48	-1.63815e-09	0.00144269	0.999891	0.999991
ABCB11	64.3459	6.09434e-07	0.00144269	0.151308	0.999991
ABCB4	391.421	7.61153e-07	0.00144269	0.317328	0.999991
ABCB6	900.829	-6.51652e-07	0.00144269	0.600941	0.999991
ABCB7	2628.91	1.9496e-07	0.00144269	0.880342	0.999991
ABCB8	2042.71	-8.31352e-08	0.00144269	0.943448	0.999991
ABCB9	819.622	9.78659e-07	0.00144269	0.188906	0.999991
ABCC1	7125.22	1.2092e-07	0.00144269	0.912929	0.999991
ABCC10	4587.69	-1.47141e-07	0.00144269	0.911575	0.999991
ABCC11	8340.14	-3.25499e-07	0.00144269	0.412722	0.999991
ABCC12	436.671	6.4199e-08	0.0014427	0.983514	0.999991
ABCC13	21.0053	-2.36948e-07	0.00144269	0.291061	0.999991
ABCC2	456.921	4.24478e-07	0.00144269	0.532628	0.999991
ABCC3	5483.56	7.10792e-07	0.00144269	0.439397	0.999991
ABCC4	3394.14	-7.27223e-08	0.00144269	0.914258	0.999991
ABCC6	769.65	-3.96745e-07	0.00144269	0.482965	0.999991
ABCC6P1	42.4657	-2.36415e-07	0.00144269	0.620225	0.999991
ABCC6P2	24.0116	2.44723e-07	0.00144269	0.417616	0.999991
ABCC8	633.234	3.69079e-07	0.00144269	0.218417	0.999991
ABCC9	3596.96	-6.75014e-07	0.00144269	0.579068	0.999991
ABCD1	2972.37	-4.84316e-07	0.00144269	0.54778	0.999991
ABCD2	740.386	6.31426e-08	0.00144269	0.929549	0.999991
ABCD3	5197.18	-6.78086e-08	0.00144269	0.955431	0.999991
ABCD4	2437.13	-3.98359e-07	0.00144269	0.756047	0.999991
ABCE1	5510.11	4.31211e-07	0.00144269	0.752761	0.999991
ABCF1	4100.75	4.33411e-07	0.00144269	0.744382	0.999991
ABCF2	2764.48	5.01497e-07	0.00144269	0.701578	0.999991
ABCF3	3683.49	-6.26894e-08	0.00144269	0.957554	0.999991
ABCG1	5718.53	-8.84639e-07	0.00144269	0.333595	0.999991
ABCG2	406.7	1.2643e-07	0.00144269	0.865852	0.999991
ABCG4	25.239	6.78176e-10	0.00144269	0.998811	0.999991
ABHD1	54.1849	1.62372e-07	0.00144269	0.811714	0.999991
ABHD10	706.923	-6.91557e-08	0.00144269	0.956614	0.999991
ABHD11	1795.38	-1.27982e-07	0.00144269	0.924129	0.999991
ABHD12	3089.17	-2.10525e-06	0.00144269	0.100113	0.999991
ABHD13	987.433	2.48068e-07	0.00144269	0.825043	0.999991
ABHD14A	455.532	-2.06454e-07	0.00144269	0.83971	0.999991
ABHD14B	1143.87	2.00288e-07	0.00144269	0.865295	0.999991
ABHD15	648.538	-6.40832e-07	0.00144269	0.59783	0.999991
ABHD16A	2475.35	-2.66018e-07	0.00144269	0.809763	0.999991
ABHD16B	21.8319	6.65927e-08	0.00144269	0.90359	0.999991
ABHD17A	2284.56	-1.04817e-07	0.00144269	0.92567	0.999991
ABHD17B	708.91	3.05635e-07	0.00144269	0.80225	0.999991
ABHD17C	909.777	1.01518e-06	0.00144269	0.36396	0.999991
ABHD2	7129.5	-1.31539e-06	0.00144269	0.326101	0.999991
ABHD3	1963.76	-1.30988e-08	0.00144269	0.993389	0.999991
ABHD4	1228.29	-1.46375e-06	0.00144269	0.241855	0.999991
ABHD5	1030.77	-7.38913e-07	0.00144269	0.473639	0.999991
ABHD6	452.555	1.35009e-07	0.00144269	0.889868	0.999991
ABHD8	960.619	9.29716e-08	0.00144269	0.94246	0.999991
ABI1	7581.53	-7.13904e-08	0.00144269	0.939887	0.999991
ABI2	3417.19	-1.44832e-07	0.00144269	0.905536	0.999991
ABI3	2742	-1.27369e-07	0.00144269	0.871464	0.999991
ABI3BP	8812.79	-8.55798e-07	0.00144269	0.395865	0.999991
ABL1	33335.9	-1.28257e-06	0.00144269	0.265273	0.999991
ABL2	4037.45	-1.51099e-06	0.00144269	0.252551	0.999991
ABLIM1	3019.74	4.09001e-07	0.00144269	0.582407	0.999991
ABLIM2	401.979	1.29789e-06	0.00144269	0.146103	0.999991
ABLIM3	2398.85	1.40134e-07	0.00144269	0.85486	0.999991
ABO	444.023	5.76313e-07	0.00144269	0.581149	0.999991
ABR	13361.4	-1.42283e-06	0.00144269	0.254818	0.999991
ABRACL	1875.41	7.92285e-08	0.00144269	0.921177	0.999991
ABT1	1126.55	6.27654e-07	0.00144269	0.581324	0.999991
ABTB1	2708.38	-6.07185e-07	0.00144269	0.570867	0.999991
ABTB2	1053.01	1.98033e-06	0.00144269	0.0987333	0.999991
ACAA1	1986.31	-1.77393e-07	0.00144269	0.87988	0.999991
ACAA2	1583.84	-1.11795e-06	0.00144269	0.366709	0.999991
ACACA	8429	-4.40324e-08	0.00144269	0.979157	0.999991
ACACB	8456.25	-2.91896e-09	0.00144269	0.999991	0.999991
ACAD10	3138.16	1.73935e-07	0.00144269	0.896382	0.999991
ACAD11	51.2166	3.8739e-07	0.00144269	0.5794	0.999991
ACAD8	1114.44	1.68667e-07	0.00144269	0.89809	0.999991
ACAD9	4118.42	7.18952e-09	0.00144269	0.992413	0.999991
ACADL	135	5.51221e-08	0.00144269	0.914742	0.999991
ACADM	2813.74	6.96911e-07	0.00144269	0.583421	0.999991
ACADS	607.64	-4.68523e-07	0.00144269	0.676703	0.999991
ACADSB	3383.8	2.59572e-09	0.00144269	0.986135	0.999991
ACADVL	13353.7	-6.99705e-07	0.00144269	0.564241	0.999991
ACAN	853.924	-1.10271e-06	0.00144269	0.135831	0.999991
ACAP1	2651.7	2.56075e-07	0.00144269	0.719955	0.999991
ACAP2	6449.72	1.36858e-07	0.00144269	0.907256	0.999991
ACAP3	3754.58	-9.20306e-07	0.00144269	0.41647	0.999991
ACAT1	2249.11	-4.87832e-07	0.00144269	0.689904	0.999991
ACAT2	1113.25	7.4848e-07	0.00144269	0.501192	0.999991
ACBD3	5335.59	-2.12094e-07	0.00144269	0.83626	0.999991
ACBD4	1079.15	4.89162e-07	0.00144269	0.622721	0.999991
ACBD5	2622.89	-4.0359e-07	0.00144269	0.727206	0.999991
ACBD6	1835.85	8.26697e-08	0.00144269	0.947434	0.999991
ACBD7	65.6031	2.166e-07	0.00144269	0.635822	0.999991
ACCS	1417.42	-1.22896e-06	0.00144269	0.155579	0.999991
ACD	999.076	2.67837e-06	0.00144269	0.857288	0.999991
ACE	5560.98	-1.11355e-06	0.00144269	0.17173	0.999991
ACE2	62.2136	3.00485e-07	0.0014427	0.0922811	0.999991
ACER2	396.324	1.40345e-07	0.00144269	0.850564	0.999991
ACER3	1217.34	-5.09131e-07	0.00144269	0.647588	0.999991
ACIN1	15051.7	7.43398e-08	0.00144269	0.953068	0.999991
ACKR1	1507.63	4.50627e-07	0.00144269	0.522949	0.999991
ACKR2	136.457	7.72354e-07	0.00144269	0.20044	0.999991
ACKR3	848.376	-1.73651e-06	0.00144269	0.115039	0.999991
ACKR4	133.609	-7.35133e-07	0.00144269	0.185486	0.999991
ACLY	13193.2	-1.53694e-07	0.00144269	0.91543	0.999991
ACN9	250.552	3.9413e-07	0.00144269	0.642665	0.999991
ACO1	2944.86	-1.08204e-06	0.00144269	0.402644	0.999991
ACO2	8167.29	4.76253e-07	0.00144269	0.705298	0.999991
ACOT1	250.096	-3.26703e-07	0.00144269	0.718154	0.999991
ACOT11	914.146	-2.24947e-06	0.00144269	0.0583972	0.999991
ACOT13	711.535	-6.64333e-07	0.00144269	0.566771	0.999991
ACOT2	935.862	-1.98077e-06	0.00144269	0.0607797	0.999991
ACOT4	209.35	-6.76979e-07	0.00144269	0.483152	0.999991
ACOT7	1237.8	4.57773e-07	0.00144269	0.657345	0.999991
ACOT8	993.213	2.41054e-07	0.00144269	0.848793	0.999991
ACOT9	1798.38	-1.08168e-06	0.00144269	0.290129	0.999991
ACOX1	3277.43	-5.91979e-07	0.00144269	0.515619	0.999991
ACOX3	2177.58	-2.38655e-07	0.00144269	0.829019	0.999991
ACP1	1659.82	4.42113e-07	0.00144269	0.739506	0.999991
ACP2	3659.84	-1.19188e-06	0.00144269	0.326012	0.999991
ACP6	641.012	3.30377e-07	0.00144269	0.748876	0.999991
ACPP	193.62	-2.51502e-07	0.00144269	0.751806	0.999991
ACR	73.4384	-6.18185e-08	0.00144269	0.936802	0.999991
ACRBP	378.459	-5.37673e-07	0.00144269	0.526823	0.999991
ACRC	922.897	7.18383e-07	0.00144269	0.493704	0.999991
ACSF2	2043.64	-4.38797e-07	0.00144269	0.716005	0.999991
ACSF3	2633.84	6.02429e-07	0.00144269	0.604925	0.999991
ACSL1	5183.97	-1.24073e-06	0.00144269	0.22455	0.999991
ACSL3	7859.57	-7.78506e-07	0.00144269	0.548808	0.999991
ACSL4	5759.81	-2.59185e-07	0.00144269	0.76484	0.999991
ACSL5	2594.83	1.00933e-07	0.00144269	0.890593	0.999991
ACSL6	418.634	3.36859e-07	0.00144269	0.485432	0.999991
ACSM1	60.4171	2.09409e-07	0.00144269	0.700304	0.999991
ACSM3	230.089	-7.11814e-07	0.00144269	0.460853	0.999991
ACSM5	228.376	-1.14081e-06	0.00144269	0.265969	0.999991
ACSS1	2078.15	-3.98884e-08	0.00144269	0.966817	0.999991
ACSS2	1860.58	-3.53584e-07	0.00144269	0.718075	0.999991
ACSS3	809.719	2.48056e-07	0.00144269	0.833175	0.999991
ACTA1	1068.63	-8.60118e-09	0.00144269	0.998396	0.999991
ACTA2	17626	-1.16199e-06	0.00144269	0.372187	0.999991
ACTA2-AS1	39.0237	1.42689e-08	0.00144269	0.987005	0.999991
ACTB	266023	-9.21245e-08	0.00144269	0.92382	0.999991
ACTC1	114.728	-6.7454e-07	0.00144269	0.110598	0.999991
ACTG1	124186	2.39532e-07	0.00144269	0.841213	0.999991
ACTG2	10772	-3.62193e-07	0.00144269	0.411597	0.999991
ACTL10	205.539	4.84794e-08	0.00144269	0.949317	0.999991
ACTL6A	2968.36	3.13509e-07	0.00144269	0.799551	0.999991
ACTL8	32.9056	1.97315e-07	0.0014427	0.314567	0.999991
ACTN1	29712.4	-1.04654e-06	0.00144269	0.313964	0.999991
ACTN2	110.576	2.01094e-07	0.00144269	0.748983	0.999991
ACTN3	42.7511	-4.86906e-07	0.00144269	0.403716	0.999991
ACTN4	50283.7	4.41508e-07	0.00144269	0.732124	0.999991
ACTR10	2509.49	-3.81294e-07	0.00144269	0.747427	0.999991
ACTR1A	2665.88	-8.06961e-07	0.00144269	0.522276	0.999991
ACTR1B	2736.19	-1.09231e-08	0.00144269	0.990769	0.999991
ACTR2	20201.2	3.32981e-08	0.00144269	0.980675	0.999991
ACTR3	17650.1	1.8261e-07	0.00144269	0.873663	0.999991
ACTR3B	976.704	7.15277e-07	0.00144269	0.441316	0.999991
ACTR3C	901.04	8.69211e-07	0.00144269	0.316591	0.999991
ACTR5	816.296	2.49766e-07	0.00144269	0.837641	0.999991
ACTR6	2010.34	1.37172e-07	0.00144269	0.89946	0.999991
ACTR8	1946	3.85513e-08	0.00144269	0.977617	0.999991
ACTRT3	99.6628	-5.43811e-07	0.00144269	0.505893	0.999991
ACVR1	2181.31	-1.32668e-06	0.00144269	0.275145	0.999991
ACVR1B	1358.41	-4.77856e-07	0.00144269	0.705064	0.999991
ACVR1C	39.4951	2.61435e-07	0.00144269	0.601728	0.999991
ACVR2A	1909.45	-1.07324e-06	0.00144269	0.37573	0.999991
ACVR2B	969.994	-3.33193e-07	0.00144269	0.735863	0.999991
ACVRL1	2347.22	-1.68695e-07	0.00144269	0.884963	0.999991
ACYP1	548.455	6.29237e-07	0.00144269	0.578216	0.999991
ACYP2	190.895	3.54003e-07	0.00144269	0.722332	0.999991
ADA	1395.3	1.32472e-07	0.00144269	0.895234	0.999991
ADAL	554.455	-2.87967e-07	0.00144269	0.81515	0.999991
ADAM10	11684.3	-4.06038e-07	0.00144269	0.768826	0.999991
ADAM11	133.901	-1.86962e-07	0.00144269	0.760038	0.999991
ADAM15	8829.79	6.93374e-08	0.00144269	0.936746	0.999991
ADAM17	6322.64	-2.96642e-07	0.00144269	0.822199	0.999991
ADAM19	3377.8	1.59238e-06	0.00144269	0.0645362	0.999991
ADAM1A	440.52	2.55728e-07	0.00144269	0.826754	0.999991
ADAM20	452.567	3.21865e-07	0.00144269	0.770746	0.999991
ADAM20P1	82.9137	3.35104e-07	0.00144269	0.667061	0.999991
ADAM21	32.0638	1.85269e-07	0.00144269	0.735668	0.999991
ADAM22	449.414	1.60456e-06	0.00144269	0.141304	0.999991
ADAM23	244.012	6.03688e-07	0.00144269	0.583808	0.999991
ADAM28	3691.84	1.02965e-07	0.00144269	0.911341	0.999991
ADAM32	311.011	-4.21757e-07	0.00144269	0.587118	0.999991
ADAM33	1477.94	-9.20271e-07	0.00144269	0.153935	0.999991
ADAM8	2447.1	-2.66079e-07	0.00144269	0.734199	0.999991
ADAMDEC1	2773.35	1.08154e-07	0.00144269	0.863132	0.999991
ADAMTS1	2415.01	-1.11082e-06	0.00144269	0.3887	0.999991
ADAMTS10	2605.72	9.74582e-07	0.00144269	0.452122	0.999991
ADAMTS13	778.759	-1.09639e-07	0.00144269	0.90102	0.999991
ADAMTS15	1524.38	-5.94774e-07	0.00144269	0.212266	0.999991
ADAMTS17	346.992	2.04016e-07	0.00144269	0.816246	0.999991
ADAMTS19	35.9606	-2.37444e-07	0.00144269	0.556733	0.999991
ADAMTS20	95.5079	3.69824e-07	0.0014427	0.0848388	0.999991
ADAMTS3	181.345	2.03409e-07	0.00144269	0.831479	0.999991
ADAMTS4	1311.47	-9.33346e-07	0.00144269	0.404323	0.999991
ADAMTS5	1361.4	-2.12327e-06	0.00144269	0.0712971	0.999991
ADAMTS6	849.791	-1.22765e-06	0.00144269	0.290365	0.999991
ADAMTS7	1212.23	-2.12692e-06	0.00144269	0.0737919	0.999991
ADAMTS7P1	39.2505	2.11334e-07	0.00144269	0.730004	0.999991
ADAMTS8	154.965	8.29123e-08	0.00144269	0.909399	0.999991
ADAMTS9	3088.07	-3.53132e-07	0.00144269	0.772634	0.999991
ADAMTSL1	883	-3.32467e-07	0.00144269	0.664193	0.999991
ADAMTSL4	2386.23	-1.50747e-06	0.00144269	0.0861875	0.999991
ADAMTSL5	247.644	-1.62925e-07	0.00144269	0.812187	0.999991
ADAP1	1186.02	-5.32745e-07	0.00144269	0.455446	0.999991
ADAP2	3276.79	-9.82444e-07	0.00144269	0.223584	0.999991
ADAR	26191.5	1.04107e-07	0.00144269	0.922739	0.999991
ADARB1	3754.83	1.73637e-06	0.00144269	0.181046	0.999991
ADARB2	86.3574	2.38467e-07	0.00144269	0.734867	0.999991
ADAT1	1355.77	-3.98651e-07	0.00144269	0.73185	0.999991
ADAT2	307.243	-6.91757e-08	0.00144269	0.94637	0.999991
ADAT3	426.621	6.00086e-07	0.00144269	0.568028	0.999991
ADCK1	429.493	-1.96397e-07	0.00144269	0.80935	0.999991
ADCK2	2430.62	-2.86499e-07	0.00144269	0.810431	0.999991
ADCK3	2746.08	2.52005e-07	0.00144269	0.779943	0.999991
ADCK4	1592.48	3.16683e-07	0.00144269	0.778359	0.999991
ADCK5	948.307	-1.25327e-07	0.00144269	0.924849	0.999991
ADCY1	672.951	-2.44654e-07	0.00144269	0.84626	0.999991
ADCY10	39.1037	2.39163e-07	0.00144269	0.705013	0.999991
ADCY10P1	65.0263	5.48598e-07	0.00144269	0.458668	0.999991
ADCY3	6705.36	-9.27234e-07	0.00144269	0.437068	0.999991
ADCY4	1733.61	3.268e-07	0.00144269	0.771478	0.999991
ADCY5	4623.67	4.68962e-07	0.00144269	0.197281	0.999991
ADCY6	5215.26	-3.23626e-07	0.00144269	0.757973	0.999991
ADCY7	11186.4	-4.18666e-07	0.00144269	0.612345	0.999991
ADCY9	4402.81	-6.09339e-07	0.00144269	0.56544	0.999991
ADCYAP1	219.189	-1.12076e-07	0.00144269	0.816048	0.999991
ADCYAP1R1	46.0114	-6.95418e-07	0.00144269	0.153246	0.999991
ADD1	12382.3	-4.85824e-08	0.00144269	0.962542	0.999991
ADD2	756.551	1.03538e-06	0.00144269	0.315183	0.999991
ADD3	8953.02	3.42302e-08	0.00144269	0.982453	0.999991
ADGB	56.298	-4.94681e-07	0.00144269	0.258255	0.999991
ADH1A	36.1705	2.27821e-07	0.00144269	0.662506	0.999991
ADH1C	84.7944	-2.61812e-07	0.00144269	0.6444	0.999991
ADH4	25.2804	2.8655e-07	0.00144269	0.250818	0.999991
ADH5	3591.18	-8.29874e-07	0.00144269	0.516998	0.999991
ADHFE1	813.319	2.12194e-07	0.00144269	0.751582	0.999991
ADI1	1327.11	-3.08864e-07	0.00144269	0.788644	0.999991
ADIPOR1	5448.96	-6.96988e-07	0.00144269	0.599438	0.999991
ADIPOR2	3454.89	5.74579e-08	0.00144269	0.956981	0.999991
ADK	2331.54	5.12317e-07	0.00144269	0.580064	0.999991
ADM	535.056	-5.93282e-07	0.00144269	0.483556	0.999991
ADM5	150.834	5.33603e-07	0.00144269	0.475067	0.999991
ADNP	12640.3	7.47755e-08	0.00144269	0.951978	0.999991
ADNP2	3005.31	-2.67777e-07	0.00144269	0.834629	0.999991
ADO	965.736	4.3554e-07	0.00144269	0.734868	0.999991
ADORA1	2618.87	-3.59308e-07	0.00144269	0.647293	0.999991
ADORA2B	164.185	-6.22877e-07	0.00144269	0.42121	0.999991
ADPGK	2619.44	-5.0028e-07	0.00144269	0.655078	0.999991
ADPRH	381.279	-1.76086e-07	0.00144269	0.829206	0.999991
ADPRHL1	151.091	-4.13427e-08	0.00144269	0.962269	0.999991
ADPRHL2	957.351	-6.71453e-07	0.00144269	0.592177	0.999991
ADPRM	475.063	1.12598e-06	0.00144269	0.30016	0.999991
ADRA1B	102.341	4.51131e-07	0.00144269	0.360675	0.999991
ADRA2A	1167.34	6.17626e-07	0.00144269	0.271692	0.999991
ADRA2B	49.937	-7.68968e-07	0.00144269	0.229285	0.999991
ADRA2C	275.217	5.25576e-07	0.00144269	0.228269	0.999991
ADRB1	100.05	-8.90871e-08	0.00144269	0.84676	0.999991
ADRB2	632.896	-3.94192e-07	0.00144269	0.643354	0.999991
ADRBK1	16384.6	2.25616e-07	0.00144269	0.845515	0.999991
ADRBK2	6421.17	1.91641e-07	0.00144269	0.863541	0.999991
ADRM1	7021.37	1.32012e-07	0.00144269	0.875761	0.999991
ADSL	2867.02	2.40835e-07	0.00144269	0.838652	0.999991
ADSS	7756.13	8.31889e-08	0.00144269	0.929212	0.999991
ADSSL1	415.691	-4.81559e-07	0.00144269	0.578833	0.999991
ADTRP	135.193	2.56141e-07	0.00144269	0.620439	0.999991
AEBP2	2884.24	1.85791e-07	0.00144269	0.859612	0.999991
AEN	811.416	2.43278e-07	0.00144269	0.846462	0.999991
AES	10894.1	6.59856e-07	0.00144269	0.613054	0.999991
AFAP1	2771.65	-1.14691e-06	0.00144269	0.386916	0.999991
AFAP1-AS1	112.698	4.25189e-07	0.00144269	0.34054	0.999991
AFAP1L1	1184.59	3.31126e-07	0.00144269	0.796302	0.999991
AFAP1L2	1044.05	-3.79237e-07	0.00144269	0.760061	0.999991
AFF1	12745.4	-5.65233e-07	0.00144269	0.621054	0.999991
AFF3	16650.6	5.62049e-07	0.00144269	0.108418	0.999991
AFF4	12437	-2.88899e-07	0.00144269	0.787884	0.999991
AFG3L1P	168.429	5.18714e-07	0.00144269	0.564988	0.999991
AFG3L2	5574.27	-2.28985e-07	0.00144269	0.811719	0.999991
AFM	23.3994	-2.33586e-08	0.0014427	0.977109	0.999991
AFMID	772.441	-4.38981e-08	0.00144269	0.968265	0.999991
AFTPH	6316.16	8.94146e-07	0.00144269	0.45045	0.999991
AGA	840.716	4.40958e-07	0.00144269	0.726544	0.999991
AGAP1	4632.87	-1.184e-06	0.00144269	0.307345	0.999991
AGAP11	874.862	-8.55213e-07	0.00144269	0.315081	0.999991
AGAP2	2495.75	1.79523e-07	0.00144269	0.825764	0.999991
AGAP2-AS1	551.728	-1.29038e-06	0.00144269	0.28365	0.999991
AGAP3	6950.97	-1.32083e-06	0.00144269	0.289865	0.999991
AGAP4	641.711	5.15096e-07	0.00144269	0.626279	0.999991
AGAP6	3090.04	4.75042e-07	0.00144269	0.725902	0.999991
AGAP7P	48.6169	4.48382e-07	0.00144269	0.51331	0.999991
AGBL1	157.552	-1.0974e-07	0.00144269	0.753088	0.999991
AGBL2	488.362	4.12324e-07	0.00144269	0.543534	0.999991
AGBL3	212.713	1.11661e-06	0.00144269	0.249451	0.999991
AGBL4	90.3267	-2.1669e-07	0.00144269	0.673761	0.999991
AGBL5	1783.5	2.80683e-07	0.00144269	0.802162	0.999991
AGER	1023.79	3.19315e-07	0.00144269	0.750589	0.999991
AGFG1	6997.74	8.90192e-08	0.00144269	0.925879	0.999991
AGFG2	1618.66	4.69399e-07	0.00144269	0.669665	0.999991
AGGF1	6162.95	-1.15836e-07	0.00144269	0.932938	0.999991
AGK	1436.15	3.30041e-07	0.00144269	0.759219	0.999991
AGL	6019.29	1.59709e-07	0.00144269	0.87729	0.999991
AGMAT	178.591	5.09285e-07	0.00144269	0.356938	0.999991
AGMO	45.6757	1.54104e-07	0.00144269	0.819155	0.999991
AGO1	4477.55	-3.17559e-07	0.00144269	0.80647	0.999991
AGO2	9426.21	6.20598e-08	0.00144269	0.960919	0.999991
AGO3	5001.25	1.58389e-07	0.00144269	0.896673	0.999991
AGO4	3913.96	-9.63776e-07	0.00144269	0.470449	0.999991
AGPAT1	2199.51	-4.02071e-07	0.00144269	0.765241	0.999991
AGPAT2	1760.7	-8.45634e-07	0.00144269	0.428233	0.999991
AGPAT3	4853.97	-9.98918e-08	0.00144269	0.923447	0.999991
AGPAT4-IT1	79.7408	-7.75947e-07	0.00144269	0.242369	0.999991
AGPAT5	2130.5	2.3417e-07	0.00144269	0.786639	0.999991
AGPAT6	3789.84	-1.93982e-08	0.00144269	0.987972	0.999991
AGPAT9	260.447	-5.20693e-07	0.00144269	0.556012	0.999991
AGPS	4867.35	-7.80688e-07	0.00144269	0.436532	0.999991
AGR2	5738.02	-3.37321e-07	0.00144269	0.356944	0.999991
AGR3	3283.6	-4.49392e-07	0.00144269	0.182045	0.999991
AGRN	17204.5	-5.48532e-07	0.00144269	0.565037	0.999991
AGT	1200.16	-7.3947e-07	0.00144269	0.111517	0.999991
AGTPBP1	4593.85	-5.81922e-07	0.00144269	0.604762	0.999991
AGTR2	26.7563	3.26753e-08	0.0014427	0.973788	0.999991
AGTRAP	1422.05	-1.02956e-06	0.00144269	0.413912	0.999991
AGXT	30.3787	-2.88021e-07	0.0014427	0.202519	0.999991
AHCTF1	15182.4	2.79934e-07	0.00144269	0.79196	0.999991
AHCTF1P1	788.467	2.32219e-07	0.00144269	0.796463	0.999991
AHCY	4590.96	-1.55467e-07	0.00144269	0.909892	0.999991
AHCYL1	4643.31	-6.72092e-07	0.00144269	0.572762	0.999991
AHCYL2	1506.34	5.59599e-07	0.00144269	0.669131	0.999991
AHDC1	5938.66	-3.93192e-07	0.00144269	0.698197	0.999991
AHI1	5825.51	-1.4156e-06	0.00144269	0.245734	0.999991
AHNAK	463156	-1.63134e-06	0.00144269	0.124565	0.999991
AHR	13445.3	-5.4417e-07	0.00144269	0.673973	0.999991
AHRR	153.944	-3.4865e-07	0.00144269	0.661723	0.999991
AHSA1	3241.04	2.46233e-07	0.00144269	0.843201	0.999991
AHSA2	3027.96	4.62222e-07	0.00144269	0.644522	0.999991
AHSG	34.3077	-1.21753e-08	0.0014427	0.972144	0.999991
AIDA	4408.05	-3.81281e-07	0.00144269	0.665079	0.999991
AIF1	1401.55	-6.34243e-07	0.00144269	0.347134	0.999991
AIF1L	1244.08	6.44794e-07	0.00144269	0.569368	0.999991
AIFM1	2229.88	-1.15051e-08	0.00144269	0.995011	0.999991
AIFM2	826.283	8.31817e-08	0.00144269	0.930042	0.999991
AIFM3	426.07	-1.44134e-06	0.00144269	0.123133	0.999991
AIG1	1442.25	-7.94467e-07	0.00144269	0.420414	0.999991
AIM1	7845.28	2.85145e-07	0.00144269	0.675981	0.999991
AIM1L	222.574	-3.45091e-07	0.00144269	0.706774	0.999991
AIM2	1467.76	3.15662e-07	0.00144269	0.631781	0.999991
AIMP1	2195.44	2.69778e-07	0.00144269	0.827885	0.999991
AIMP2	973.296	3.83807e-07	0.00144269	0.761973	0.999991
AIP	2295.8	4.48467e-07	0.00144269	0.740578	0.999991
AJAP1	196.81	-2.35221e-07	0.00144269	0.66797	0.999991
AJUBA	762.848	4.29227e-07	0.00144269	0.649962	0.999991
AK1	1422.06	-6.54816e-07	0.00144269	0.460561	0.999991
AK2	3260.83	5.37507e-07	0.00144269	0.649648	0.999991
AK3	1392.06	-2.55394e-07	0.00144269	0.828244	0.999991
AK4	551.929	-6.04397e-07	0.00144269	0.549794	0.999991
AK5	236.489	-1.20145e-06	0.00144269	0.0612876	0.999991
AK7	81.9365	7.85005e-07	0.00144269	0.209779	0.999991
AK8	142.96	3.4091e-07	0.00144269	0.609463	0.999991
AK9	1017.07	1.03951e-06	0.00144269	0.2928	0.999991
AKAP1	4799.45	4.49917e-07	0.00144269	0.71824	0.999991
AKAP10	4435.69	-1.20894e-07	0.00144269	0.923598	0.999991
AKAP11	10802	1.94872e-07	0.00144269	0.869642	0.999991
AKAP12	2564.82	-1.12946e-07	0.00144269	0.91709	0.999991
AKAP13	24769.3	-6.28159e-07	0.00144269	0.637527	0.999991
AKAP17A	4798.62	3.3094e-07	0.00144269	0.749723	0.999991
AKAP2	33.0155	3.81425e-07	0.00144269	0.536202	0.999991
AKAP3	204.261	5.91986e-07	0.00144269	0.287078	0.999991
AKAP5	302.835	-1.18176e-06	0.00144269	0.226036	0.999991
AKAP6	550.805	4.23229e-07	0.00144269	0.651033	0.999991
AKAP7	524.597	2.44639e-09	0.00144269	0.99979	0.999991
AKAP8	3041.91	5.0478e-07	0.00144269	0.697626	0.999991
AKAP8L	6250.57	2.18488e-07	0.00144269	0.834602	0.999991
AKAP9	142651	3.15038e-08	0.00144269	0.976866	0.999991
AKIP1	758.278	-4.75112e-07	0.00144269	0.677364	0.999991
AKIRIN1	2494.66	8.51733e-07	0.00144269	0.480666	0.999991
AKIRIN2	1434.75	6.89786e-08	0.00144269	0.945488	0.999991
AKNA	16369.3	1.87423e-07	0.00144269	0.840465	0.999991
AKR1A1	4413.15	-8.90111e-07	0.00144269	0.444519	0.999991
AKR1B1	1852.39	-1.22357e-06	0.00144269	0.102257	0.999991
AKR1C1	837.24	-5.70085e-07	0.00144269	0.445525	0.999991
AKR1C2	3354.23	-4.1229e-07	0.00144269	0.296779	0.999991
AKR1C3	901.117	-6.11312e-07	0.00144269	0.302638	0.999991
AKR1CL1	22.9468	5.07572e-08	0.00144269	0.915178	0.999991
AKR1E2	297.928	6.70943e-08	0.00144269	0.951982	0.999991
AKR7A2	3187.38	-9.69626e-07	0.00144269	0.411893	0.999991
AKR7A3	1122.26	-1.02809e-07	0.00144269	0.860171	0.999991
AKR7L	140.715	-1.2717e-07	0.00144269	0.846947	0.999991
AKT1	55940.7	-4.15825e-07	0.00144269	0.660083	0.999991
AKT1S1	1290.45	-1.27623e-06	0.00144269	0.24423	0.999991
AKT2	31460.3	3.54562e-07	0.00144269	0.726852	0.999991
AKT3	31637.2	-2.83723e-08	0.00144269	0.973686	0.999991
AKTIP	1450.7	-2.58546e-07	0.00144269	0.822746	0.999991
ALAD	1007.94	-1.41179e-07	0.00144269	0.897666	0.999991
ALAS1	3002.84	-4.90924e-07	0.00144269	0.651502	0.999991
ALAS2	136.811	-4.98763e-07	0.00144269	0.439091	0.999991
ALB	638.566	-2.30947e-07	0.00144269	0.687786	0.999991
ALCAM	7865.6	-4.00381e-07	0.00144269	0.692348	0.999991
ALDH16A1	2201.66	6.15766e-07	0.00144269	0.585679	0.999991
ALDH18A1	3700.95	-4.51046e-07	0.00144269	0.725246	0.999991
ALDH1A2	74.0067	-9.57625e-07	0.00144269	0.190424	0.999991
ALDH1B1	971.341	-1.44375e-06	0.00144269	0.181417	0.999991
ALDH1L1	56.7297	2.99948e-07	0.00144269	0.582892	0.999991
ALDH2	8609.45	-4.76764e-07	0.00144269	0.514774	0.999991
ALDH3A1	21.9782	-2.66171e-08	0.00144269	0.951903	0.999991
ALDH3A2	5073.84	-4.11352e-07	0.00144269	0.634709	0.999991
ALDH3B1	3238.8	-7.56848e-07	0.00144269	0.316297	0.999991
ALDH3B2	1445.37	4.93211e-07	0.00144269	0.256512	0.999991
ALDH4A1	635.271	-4.27906e-07	0.00144269	0.725038	0.999991
ALDH5A1	542.741	5.51661e-07	0.00144269	0.402622	0.999991
ALDH6A1	1203.17	-7.25078e-07	0.00144269	0.551765	0.999991
ALDH7A1	4981.8	-4.59193e-07	0.00144269	0.572042	0.999991
ALDH8A1	115.587	-4.24103e-07	0.00144269	0.539762	0.999991
ALDH9A1	3196.96	-5.76132e-07	0.00144269	0.668524	0.999991
ALDOA	36735.7	-3.98924e-07	0.00144269	0.712981	0.999991
ALDOB	81.8982	4.12933e-07	0.00144269	0.214719	0.999991
ALDOC	409.468	6.68778e-07	0.00144269	0.430521	0.999991
ALG1	1217.54	-1.58552e-07	0.00144269	0.894106	0.999991
ALG10	1604.11	4.50896e-07	0.00144269	0.737004	0.999991
ALG10B	1213.48	8.40532e-07	0.00144269	0.513827	0.999991
ALG11	651.182	2.43989e-07	0.00144269	0.847075	0.999991
ALG12	2542.96	-2.13488e-07	0.00144269	0.864934	0.999991
ALG13	6688.69	3.83841e-07	0.00144269	0.773117	0.999991
ALG14	282.191	1.24223e-07	0.00144269	0.896115	0.999991
ALG1L	103.728	-5.70025e-07	0.00144269	0.450906	0.999991
ALG1L2	43.9061	6.41521e-07	0.00144269	0.113409	0.999991
ALG1L9P	94.3522	1.12417e-07	0.00144269	0.884954	0.999991
ALG2	1203.7	2.10451e-07	0.00144269	0.833938	0.999991
ALG3	1462.32	-2.95175e-08	0.00144269	0.978793	0.999991
ALG5	1616.99	1.20296e-07	0.00144269	0.915541	0.999991
ALG6	1576.98	4.70038e-07	0.00144269	0.6821	0.999991
ALG8	1923.16	5.67665e-08	0.00144269	0.955234	0.999991
ALG9	1148.66	8.9085e-08	0.00144269	0.94539	0.999991
ALKBH1	543.984	3.56115e-07	0.00144269	0.758882	0.999991
ALKBH2	362.981	5.22622e-07	0.00144269	0.610181	0.999991
ALKBH3	947.155	1.81895e-07	0.00144269	0.842511	0.999991
ALKBH4	374.322	2.18175e-08	0.00144269	0.980437	0.999991
ALKBH5	4947	-4.07718e-07	0.00144269	0.758776	0.999991
ALKBH6	501.158	6.78019e-07	0.00144269	0.536872	0.999991
ALKBH7	598.144	-4.79681e-07	0.00144269	0.613852	0.999991
ALKBH8	1072.09	2.34774e-07	0.00144269	0.846442	0.999991
ALLC	31.7542	1.11616e-08	0.0014427	0.974671	0.999991
ALMS1	17070.8	-2.20259e-07	0.00144269	0.843505	0.999991
ALMS1P	109.85	-9.18958e-07	0.00144269	0.12938	0.999991
ALOX5	5475.65	1.824e-07	0.00144269	0.839306	0.999991
ALOX5AP	1978.14	-8.90458e-08	0.00144269	0.902348	0.999991
ALOXE3	118.383	3.89512e-07	0.0014427	0.0889682	0.999991
ALPK1	3585.73	-7.44225e-08	0.00144269	0.951357	0.999991
ALPK2	902.307	1.14285e-06	0.00144269	0.208073	0.999991
ALPK3	973.648	4.43065e-07	0.00144269	0.729809	0.999991
ALPL	899.473	-9.94057e-07	0.00144269	0.360893	0.999991
ALS2	3792.9	-3.53872e-07	0.00144269	0.743505	0.999991
ALS2CL	1299.22	6.25468e-07	0.00144269	0.495705	0.999991
ALS2CR11	181.547	-4.16367e-07	0.00144269	0.623962	0.999991
ALS2CR12	239.864	4.77109e-07	0.00144269	0.623431	0.999991
ALYREF	1530.54	3.24528e-07	0.00144269	0.685122	0.999991
AMACR	58.0215	-2.42039e-08	0.00144269	0.97445	0.999991
AMBP	77.1827	5.51188e-07	0.00144269	0.267343	0.999991
AMBRA1	5722.09	-2.1681e-07	0.00144269	0.836967	0.999991
AMD1	4531.61	7.52499e-09	0.00144269	0.994359	0.999991
AMDHD1	110.34	-3.77775e-07	0.00144269	0.590643	0.999991
AMDHD2	2626.4	-1.34888e-06	0.00144269	0.260237	0.999991
AMER1	1243.55	2.77126e-08	0.00144269	0.968341	0.999991
AMFR	6951.74	-3.89799e-08	0.00144269	0.978525	0.999991
AMH	243.483	4.20484e-07	0.00144269	0.520436	0.999991
AMICA1	2024.5	-5.96266e-07	0.00144269	0.420368	0.999991
AMIGO1	334.094	1.45797e-06	0.00144269	0.0799703	0.999991
AMIGO2	1336.76	-1.72391e-07	0.00144269	0.847778	0.999991
AMIGO3	265.436	3.67604e-07	0.00144269	0.721039	0.999991
AMMECR1	587.158	5.39094e-07	0.00144269	0.597515	0.999991
AMMECR1L	1048.34	4.3863e-07	0.00144269	0.727974	0.999991
AMN	41.2854	5.65661e-07	0.00144269	0.0873765	0.999991
AMN1	501.148	8.16998e-07	0.00144269	0.416023	0.999991
AMOT	2629.16	-4.55666e-07	0.00144269	0.454784	0.999991
AMOTL1	4245.92	-2.71378e-07	0.00144269	0.790894	0.999991
AMOTL2	2150.87	-7.10397e-07	0.00144269	0.486236	0.999991
AMPD1	85.1891	3.53594e-07	0.00144269	0.554317	0.999991
AMPD2	3870.3	-3.25731e-07	0.00144269	0.795353	0.999991
AMPD3	3678.84	1.96999e-07	0.00144269	0.810122	0.999991
AMT	805.852	5.19019e-08	0.00144269	0.961036	0.999991
AMY2A	29.912	2.05235e-07	0.00144269	0.637908	0.999991
AMY2B	2098.12	-2.78904e-08	0.00144269	0.974869	0.999991
AMZ1	345.787	-6.87788e-07	0.00144269	0.187741	0.999991
AMZ2	4436.42	-1.46452e-07	0.00144269	0.89019	0.999991
AMZ2P1	483.402	-3.31988e-07	0.00144269	0.716858	0.999991
ANAPC1	8031.59	8.5832e-07	0.00144269	0.530051	0.999991
ANAPC10	929.339	4.47151e-07	0.00144269	0.714041	0.999991
ANAPC11	1559.66	-8.25683e-09	0.00144269	0.9944	0.999991
ANAPC13	882.411	-7.56796e-08	0.00144269	0.949211	0.999991
ANAPC15	472.859	3.33782e-07	0.00144269	0.722139	0.999991
ANAPC16	1490.93	7.89688e-07	0.00144269	0.528301	0.999991
ANAPC1P1	201.607	-2.74505e-07	0.00144269	0.73154	0.999991
ANAPC2	4997.34	1.45014e-07	0.00144269	0.875957	0.999991
ANAPC4	3553.06	-4.23859e-07	0.00144269	0.736795	0.999991
ANAPC5	6996.7	2.86988e-07	0.00144269	0.830227	0.999991
ANAPC7	3598.22	-1.8635e-07	0.00144269	0.88871	0.999991
ANG	440.487	-6.8695e-07	0.00144269	0.54753	0.999991
ANGEL1	1339.57	-6.66362e-07	0.00144269	0.527775	0.999991
ANGEL2	2758.92	3.29855e-07	0.00144269	0.750985	0.999991
ANGPT1	579.693	-9.93616e-07	0.00144269	0.292761	0.999991
ANGPT2	582.031	-6.78811e-08	0.00144269	0.955903	0.999991
ANGPTL4	439.955	-8.15807e-07	0.00144269	0.412688	0.999991
ANGPTL5	25.2319	-2.14943e-07	0.00144269	0.530011	0.999991
ANGPTL6	129.527	8.21423e-07	0.00144269	0.337005	0.999991
ANK1	492.506	4.06129e-07	0.00144269	0.507916	0.999991
ANK2	3826.6	-5.02897e-07	0.00144269	0.512698	0.999991
ANK3	8684.97	7.93378e-07	0.00144269	0.23684	0.999991
ANKAR	1652.9	4.3909e-07	0.00144269	0.693919	0.999991
ANKDD1A	335.203	4.99421e-07	0.00144269	0.575267	0.999991
ANKDD1B	123.433	3.79991e-08	0.00144269	0.970239	0.999991
ANKEF1	699.147	5.4658e-07	0.00144269	0.417226	0.999991
ANKFN1	39.5394	1.24623e-07	0.00144269	0.782572	0.999991
ANKFY1	4933.77	-6.99165e-07	0.00144269	0.574615	0.999991
ANKH	3693.45	-5.34482e-07	0.00144269	0.452649	0.999991
ANKHD1	240.974	4.38631e-07	0.00144269	0.686628	0.999991
ANKHD1-EIF4EBP3	55.0387	5.36656e-08	0.00144269	0.9414	0.999991
ANKIB1	8095.88	-2.35859e-07	0.00144269	0.817141	0.999991
ANKK1	68.5192	2.09755e-07	0.00144269	0.690923	0.999991
ANKLE1	149.308	1.33742e-06	0.00144269	0.0891252	0.999991
ANKLE2	5842.4	2.10209e-07	0.00144269	0.871647	0.999991
ANKMY1	2438.06	-8.51706e-08	0.00144269	0.943521	0.999991
ANKMY2	1857.07	-9.31851e-07	0.00144269	0.479538	0.999991
ANKRA2	1398.27	4.36132e-07	0.00144269	0.730828	0.999991
ANKRD1	22.4135	4.37807e-07	0.00144269	0.117949	0.999991
ANKRD10	7807.31	2.08233e-07	0.00144269	0.842987	0.999991
ANKRD11	17695.4	1.44959e-07	0.00144269	0.901688	0.999991
ANKRD12	18011.9	2.18861e-07	0.00144269	0.827785	0.999991
ANKRD13A	3684.85	8.04861e-07	0.00144269	0.482821	0.999991
ANKRD13B	1200.27	-1.1459e-06	0.00144269	0.249707	0.999991
ANKRD13C	2632.34	1.049e-08	0.00144269	0.993675	0.999991
ANKRD13D	4871.19	-2.24963e-07	0.00144269	0.84935	0.999991
ANKRD16	552.748	1.0375e-06	0.00144269	0.380536	0.999991
ANKRD17	25867.8	-1.75288e-07	0.00144269	0.895844	0.999991
ANKRD18A	634.818	7.63699e-07	0.00144269	0.0867291	0.999991
ANKRD18B	37.7574	1.89107e-07	0.00144269	0.60899	0.999991
ANKRD20A11P	77.5661	9.96293e-08	0.00144269	0.845161	0.999991
ANKRD20A5P	327.759	4.78782e-07	0.00144269	0.475163	0.999991
ANKRD20A8P	67.124	1.09839e-07	0.00144269	0.842296	0.999991
ANKRD22	515.386	-5.97212e-07	0.00144269	0.339486	0.999991
ANKRD23	559.734	1.04453e-06	0.00144269	0.33714	0.999991
ANKRD24	233.129	-9.00568e-07	0.00144269	0.279494	0.999991
ANKRD26	4881.39	2.76648e-07	0.00144269	0.830539	0.999991
ANKRD27	3632.96	4.59634e-07	0.00144269	0.709105	0.999991
ANKRD28	5388.02	-1.29407e-06	0.00144269	0.29062	0.999991
ANKRD29	483.101	5.77289e-07	0.00144269	0.256671	0.999991
ANKRD30A	10071.5	-6.21132e-08	0.00144269	0.976273	0.999991
ANKRD30B	1313.94	-4.20665e-07	0.00144269	0.168756	0.999991
ANKRD31	167.251	4.55764e-07	0.00144269	0.555858	0.999991
ANKRD32	2394.13	-1.55226e-07	0.00144269	0.894386	0.999991
ANKRD33B	280.364	3.6607e-07	0.00144269	0.637596	0.999991
ANKRD34A	128.893	8.725e-07	0.00144269	0.282881	0.999991
ANKRD34B	20.8099	2.30394e-07	0.00144269	0.504853	0.999991
ANKRD35	78.8336	-1.05519e-07	0.00144269	0.889422	0.999991
ANKRD36	16329.6	-4.11554e-07	0.00144269	0.699534	0.999991
ANKRD36B	8028.2	7.00264e-07	0.00144269	0.442037	0.999991
ANKRD36C	17594	-1.63077e-07	0.00144269	0.895704	0.999991
ANKRD37	293.557	-3.32198e-07	0.00144269	0.694698	0.999991
ANKRD39	470.944	6.27704e-07	0.00144269	0.537958	0.999991
ANKRD40	2721.41	-3.22113e-07	0.00144269	0.798608	0.999991
ANKRD42	1104.53	-4.63586e-07	0.00144269	0.582023	0.999991
ANKRD44	7747.79	3.27584e-07	0.00144269	0.722429	0.999991
ANKRD45	30.1995	-4.18098e-07	0.00144269	0.413269	0.999991
ANKRD46	695.043	2.82821e-07	0.00144269	0.788796	0.999991
ANKRD49	728.628	7.20301e-07	0.00144269	0.56504	0.999991
ANKRD50	5961.6	-9.54753e-07	0.00144269	0.259115	0.999991
ANKRD52	4007.1	-1.27382e-07	0.00144269	0.919559	0.999991
ANKRD53	119.611	-7.46351e-07	0.00144269	0.414258	0.999991
ANKRD54	459.423	-4.42679e-08	0.00144269	0.971259	0.999991
ANKRD55	59.9302	1.02354e-06	0.00144269	0.111758	0.999991
ANKRD6	1209.61	-1.84412e-07	0.00144269	0.864882	0.999991
ANKRD62	51.6712	2.10677e-08	0.00144269	0.952099	0.999991
ANKRD9	509.281	-1.0067e-06	0.00144269	0.33157	0.999991
ANKS1A	5316.2	4.86988e-08	0.00144269	0.967622	0.999991
ANKS1B	2653.17	4.69979e-07	0.00144269	0.584732	0.999991
ANKS3	1124.38	-1.51737e-07	0.00144269	0.899083	0.999991
ANKS6	652.558	-1.8951e-07	0.00144269	0.839169	0.999991
ANKZF1	1920.5	3.69743e-07	0.00144269	0.725916	0.999991
ANLN	4579.74	1.67075e-06	0.00144269	0.0880092	0.999991
ANO1	6094.34	-8.27365e-07	0.00144269	0.377533	0.999991
ANO10	2018.38	-6.32645e-07	0.00144269	0.519777	0.999991
ANO2	465.11	-6.35372e-07	0.00144269	0.416663	0.999991
ANO3	73.2607	4.84973e-07	0.00144269	0.323396	0.999991
ANO4	71.5157	-7.43897e-07	0.00144269	0.119857	0.999991
ANO5	200.96	-1.43132e-07	0.00144269	0.840653	0.999991
ANO6	7642.92	-1.11454e-06	0.00144269	0.328919	0.999991
ANO7	487.24	1.10034e-07	0.00144269	0.844696	0.999991
ANO8	3064.08	5.94835e-08	0.00144269	0.94904	0.999991
ANO9	2229.53	4.04667e-07	0.00144269	0.391391	0.999991
ANP32A	7426.05	5.14054e-07	0.00144269	0.684138	0.999991
ANP32B	6452.32	1.38498e-06	0.00144269	0.272776	0.999991
ANP32C	139.818	4.49343e-07	0.00144269	0.644336	0.999991
ANP32D	22.8242	8.64769e-08	0.00144269	0.863549	0.999991
ANP32E	2655.48	4.18128e-07	0.00144269	0.598343	0.999991
ANPEP	10425	-5.27126e-07	0.00144269	0.447932	0.999991
ANTXR1	8362.07	-1.70747e-06	0.00144269	0.105853	0.999991
ANTXR2	2116.06	-9.90532e-07	0.00144269	0.361136	0.999991
ANTXRL	356.172	2.26965e-07	0.00144269	0.530925	0.999991
ANXA1	8029.15	-1.43091e-06	0.00144269	0.0728605	0.999991
ANXA11	11105.6	-9.18523e-07	0.00144269	0.49028	0.999991
ANXA2	23266	-1.79759e-06	0.00144269	0.0570099	0.999991
ANXA2P1	132.651	-9.60656e-07	0.00144269	0.177513	0.999991
ANXA2P2	1997.13	-1.22063e-06	0.00144269	0.157135	0.999991
ANXA2R	328.909	4.15512e-07	0.00144269	0.647028	0.999991
ANXA3	1316.08	3.82729e-06	0.0014427	0.722663	0.999991
ANXA4	2750.7	-1.28833e-06	0.00144269	0.238798	0.999991
ANXA5	16115.1	-1.96208e-06	0.00144269	0.058378	0.999991
ANXA6	11220.7	2.3523e-07	0.00144269	0.834742	0.999991
ANXA7	5456.13	-1.66067e-07	0.00144269	0.895412	0.999991
ANXA8L1	38.9821	3.45724e-07	0.0014427	0.14165	0.999991
ANXA8L2	52.0264	3.30394e-07	0.00144269	0.204339	0.999991
ANXA9	1341.25	-1.20514e-07	0.00144269	0.829211	0.999991
AOAH	4559.15	-7.92311e-07	0.00144269	0.253504	0.999991
AOC1	92.5443	5.36465e-07	0.00144269	0.118944	0.999991
AOC2	397.494	7.72794e-07	0.00144269	0.483404	0.999991
AOC3	2238.98	-3.70189e-07	0.00144269	0.747156	0.999991
AOC4P	47.037	-3.30613e-07	0.00144269	0.627618	0.999991
AOX1	1136.84	3.54719e-07	0.00144269	0.699399	0.999991
AP1AR	1598.17	-5.52764e-07	0.00144269	0.660671	0.999991
AP1B1	12345.5	-1.47932e-06	0.00144269	0.23748	0.999991
AP1G1	6305.25	-2.06757e-09	0.00144269	0.99883	0.999991
AP1G2	5799.19	6.54232e-07	0.00144269	0.588936	0.999991
AP1M1	3650.04	-3.44962e-07	0.00144269	0.795002	0.999991
AP1S1	1221.02	4.20188e-08	0.00144269	0.990534	0.999991
AP1S2	2295.29	-6.43093e-07	0.00144269	0.467509	0.999991
AP1S3	239.469	1.01261e-06	0.00144269	0.3086	0.999991
AP2A1	10342.7	-5.70819e-07	0.00144269	0.671319	0.999991
AP2A2	10303.1	-1.06632e-06	0.00144269	0.367193	0.999991
AP2B1	13290	-6.09068e-07	0.00144269	0.625499	0.999991
AP2M1	11737	-7.26817e-07	0.00144269	0.500659	0.999991
AP2S1	3136.32	-9.67368e-07	0.00144269	0.353345	0.999991
AP3B1	8704.16	-5.57334e-07	0.00144269	0.669416	0.999991
AP3B2	158.73	2.20722e-07	0.00144269	0.629818	0.999991
AP3D1	15023.1	5.5943e-08	0.00144269	0.965572	0.999991
AP3M1	4269.88	1.02472e-07	0.00144269	0.940754	0.999991
AP3M2	1636.61	2.09933e-07	0.00144269	0.799332	0.999991
AP3S1	3113.7	-7.60017e-07	0.00144269	0.532769	0.999991
AP3S2	81.9123	6.38819e-08	0.00144269	0.941052	0.999991
AP4B1	1818.4	6.30072e-07	0.00144269	0.619747	0.999991
AP4E1	2272.74	1.95558e-07	0.00144269	0.880604	0.999991
AP4M1	855.088	-7.20358e-07	0.00144269	0.478494	0.999991
AP4S1	323.745	4.02119e-08	0.00144269	0.973252	0.999991
AP5B1	1638.13	-6.70267e-07	0.00144269	0.552124	0.999991
AP5M1	2665.25	-5.26481e-08	0.00144269	0.959438	0.999991
AP5S1	464.69	-1.76194e-07	0.00144269	0.875815	0.999991
AP5Z1	2694.15	-7.4128e-08	0.00144269	0.954086	0.999991
APAF1	3810.75	-8.97469e-08	0.00144269	0.943962	0.999991
APBA1	590.27	-7.13865e-07	0.00144269	0.429098	0.999991
APBA2	1144.72	-3.94659e-08	0.00144269	0.951497	0.999991
APBA3	1513.19	6.05929e-07	0.00144269	0.628119	0.999991
APBB1	1238.65	-1.73196e-07	0.00144269	0.853428	0.999991
APBB1IP	5432.29	3.75189e-08	0.00144269	0.966719	0.999991
APBB2	11758.8	-2.66913e-07	0.00144269	0.779999	0.999991
APBB3	1423.29	-3.87394e-07	0.00144269	0.716534	0.999991
APC	61258	-1.49888e-07	0.00144269	0.907478	0.999991
APC2	203.607	-1.991e-07	0.00144269	0.732898	0.999991
APCDD1	1246.27	-7.43268e-07	0.00144269	0.322928	0.999991
APCS	22.9942	-2.13573e-08	0.0014427	0.976389	0.999991
APEH	3677.05	-2.22313e-07	0.00144269	0.864792	0.999991
APEX1	8032.02	4.36251e-08	0.00144269	0.965357	0.999991
APEX2	1930.71	1.87243e-08	0.00144269	0.989953	0.999991
APH1A	4437.7	-4.16887e-07	0.00144269	0.730603	0.999991
APH1B	1032.01	-7.47566e-07	0.00144269	0.554374	0.999991
API5	8230.45	9.59238e-09	0.00144269	0.992287	0.999991
APIP	1802.72	4.45902e-07	0.00144269	0.700516	0.999991
APLF	801.303	-8.89442e-08	0.00144269	0.917639	0.999991
APLN	68.4068	-8.71201e-07	0.00144269	0.106214	0.999991
APLNR	903.985	6.33714e-07	0.00144269	0.371513	0.999991
APLP1	513.384	3.05223e-07	0.00144269	0.608963	0.999991
APLP2	16093.2	-2.34119e-06	0.00144269	0.058081	0.999991
APMAP	3536.23	-5.95117e-07	0.00144269	0.528158	0.999991
APOA1	102.909	-1.46661e-08	0.00144269	0.979315	0.999991
APOA1BP	2113.59	2.62993e-07	0.00144269	0.788494	0.999991
APOA2	39.6209	-2.79706e-08	0.0014427	0.976977	0.999991
APOA4	22.5063	1.50934e-07	0.0014427	0.978158	0.999991
APOB	1590.77	-3.83885e-07	0.00144269	0.534823	0.999991
APOBEC3A	179.054	-1.61153e-07	0.00144269	0.776505	0.999991
APOBEC3B	1578.34	5.41548e-07	0.00144269	0.559173	0.999991
APOBEC3C	2309.32	-3.30952e-08	0.00144269	0.958693	0.999991
APOBEC3D	2221.49	3.46223e-07	0.00144269	0.729804	0.999991
APOBEC3F	2522.02	7.02587e-07	0.00144269	0.500975	0.999991
APOBEC3G	3401.36	-1.51792e-07	0.00144269	0.810769	0.999991
APOBEC3H	211.461	-4.9863e-07	0.00144269	0.389969	0.999991
APOBR	948.071	-3.98554e-07	0.00144269	0.617727	0.999991
APOC1P1	28.5748	-4.82805e-07	0.00144269	0.160698	0.999991
APOC3	90.8206	-3.75818e-07	0.00144269	0.192313	0.999991
APOD	3138.04	-3.78237e-07	0.00144269	0.468619	0.999991
APOH	70.6244	-1.92129e-07	0.00144269	0.515284	0.999991
APOL1	3249.25	-1.11058e-06	0.00144269	0.248065	0.999991
APOL2	3957.75	-7.87757e-07	0.00144269	0.466532	0.999991
APOL3	3482.56	-1.57744e-07	0.00144269	0.855983	0.999991
APOL4	934.015	-9.54179e-07	0.00144269	0.166242	0.999991
APOL6	2684.65	-5.18534e-07	0.00144269	0.584775	0.999991
APOLD1	293.595	3.24616e-07	0.00144269	0.758686	0.999991
APOM	40.9762	8.96726e-08	0.00144269	0.889218	0.999991
APOO	463.972	-5.94344e-07	0.00144269	0.552996	0.999991
APOOL	1451.38	-4.07926e-07	0.00144269	0.755258	0.999991
APOPT1	1145.92	-3.36062e-07	0.00144269	0.746441	0.999991
APP	23145.3	-1.38091e-06	0.00144269	0.166712	0.999991
APPBP2	3339.48	-4.33236e-07	0.00144269	0.725674	0.999991
APPL1	5942.2	-2.33148e-08	0.00144269	0.985776	0.999991
APPL2	3373.83	-8.14942e-07	0.00144269	0.343762	0.999991
APRT	1406.62	6.21504e-07	0.00144269	0.61636	0.999991
APTR	39.1271	2.64822e-07	0.00144269	0.68684	0.999991
APTX	1247.53	3.62939e-07	0.00144269	0.767254	0.999991
AQP1	4162.02	-1.29805e-06	0.00144269	0.306844	0.999991
AQP11	94.7789	-4.92763e-07	0.00144269	0.429353	0.999991
AQP3	2300.21	6.46268e-07	0.00144269	0.160275	0.999991
AQP5	235.219	2.54237e-09	0.00144269	0.966053	0.999991
AQP7	91.8737	6.99208e-07	0.00144269	0.377084	0.999991
AQP9	307.854	-7.96937e-07	0.00144269	0.108849	0.999991
AQPEP	39.4724	1.91895e-07	0.00144269	0.758161	0.999991
AQR	6586.51	2.49542e-07	0.00144269	0.849838	0.999991
AR	20115.4	-3.14302e-07	0.00144269	0.542791	0.999991
ARAF	24500.2	5.09584e-07	0.00144269	0.708532	0.999991
ARAP1	17638.5	-1.38617e-06	0.00144269	0.24744	0.999991
ARAP2	8652.03	-1.9187e-07	0.00144269	0.814973	0.999991
ARAP3	2510.43	-6.18182e-08	0.00144269	0.947849	0.999991
ARCN1	6752.62	-4.91726e-07	0.00144269	0.716122	0.999991
AREG	266.068	1.39155e-07	0.00144269	0.778723	0.999991
AREL1	3035.26	1.51912e-07	0.00144269	0.899474	0.999991
ARF1	11705	-1.74142e-07	0.00144269	0.876278	0.999991
ARF3	3444.4	-5.65304e-07	0.00144269	0.645031	0.999991
ARF4	4906.17	-8.90159e-07	0.00144269	0.431147	0.999991
ARF5	3232.5	-2.07878e-07	0.00144269	0.842415	0.999991
ARF6	7248.95	1.94235e-07	0.00144269	0.876028	0.999991
ARFGAP1	4761.82	-7.25331e-07	0.00144269	0.555827	0.999991
ARFGAP2	3578.14	4.22854e-08	0.00144269	0.970184	0.999991
ARFGAP3	2618.42	-3.01315e-07	0.00144269	0.792452	0.999991
ARFGEF1	25810.1	7.37978e-09	0.00144269	0.99363	0.999991
ARFGEF2	14247.7	4.09624e-07	0.00144269	0.682537	0.999991
ARFIP1	2247.43	-5.80528e-07	0.00144269	0.643067	0.999991
ARFIP2	1647.83	8.5638e-08	0.00144269	0.917755	0.999991
ARFRP1	3219.53	1.53645e-07	0.00144269	0.900554	0.999991
ARG2	154.489	-5.83098e-07	0.00144269	0.383045	0.999991
ARGLU1	6430.96	6.48839e-07	0.00144269	0.541369	0.999991
ARHGAP1	6378.68	-9.94569e-07	0.00144269	0.370854	0.999991
ARHGAP10	2875.97	-7.2859e-07	0.00144269	0.500766	0.999991
ARHGAP11A	2402.67	8.69185e-07	0.00144269	0.397285	0.999991
ARHGAP11B	943.823	5.84079e-07	0.00144269	0.581075	0.999991
ARHGAP12	7216.44	-3.64577e-07	0.00144269	0.779806	0.999991
ARHGAP15	4039.76	1.87668e-07	0.00144269	0.821637	0.999991
ARHGAP17	6920.11	4.65078e-07	0.00144269	0.733982	0.999991
ARHGAP18	4954.17	-1.09961e-06	0.00144269	0.285939	0.999991
ARHGAP19	43.6999	3.04537e-07	0.00144269	0.638037	0.999991
ARHGAP20	398.163	-9.9875e-07	0.00144269	0.265071	0.999991
ARHGAP21	14374.7	-9.23298e-07	0.00144269	0.282029	0.999991
ARHGAP22	989.695	-6.44628e-07	0.00144269	0.440477	0.999991
ARHGAP23	4005.2	-3.2143e-07	0.00144269	0.78571	0.999991
ARHGAP24	1593.3	-5.2586e-07	0.00144269	0.754763	0.999991
ARHGAP25	3769.21	1.21193e-07	0.00144269	0.912957	0.999991
ARHGAP26	4659.94	-4.96472e-07	0.00144269	0.649477	0.999991
ARHGAP27	3059.24	1.90497e-07	0.00144269	0.869691	0.999991
ARHGAP29	8552	1.75678e-07	0.00144269	0.843676	0.999991
ARHGAP30	9274.09	4.50186e-08	0.00144269	0.949181	0.999991
ARHGAP31	6226.23	-2.37531e-07	0.00144269	0.829826	0.999991
ARHGAP32	6367.79	-3.61162e-07	0.00144269	0.718145	0.999991
ARHGAP33	2360.28	1.84026e-07	0.00144269	0.855704	0.999991
ARHGAP35	15655.7	-7.46441e-07	0.00144269	0.568048	0.999991
ARHGAP39	1988.26	-4.90495e-07	0.00144269	0.688996	0.999991
ARHGAP4	7466.01	3.77611e-08	0.00144269	0.971999	0.999991
ARHGAP40	393.08	1.51714e-07	0.00144269	0.710479	0.999991
ARHGAP42	1428.08	3.85903e-07	0.00144269	0.757806	0.999991
ARHGAP44	924.422	7.91821e-07	0.00144269	0.220499	0.999991
ARHGAP5	15516.9	-2.10105e-07	0.00144269	0.854828	0.999991
ARHGAP6	1108.45	-4.12256e-07	0.00144269	0.552569	0.999991
ARHGAP9	2740.26	2.02212e-07	0.00144269	0.794855	0.999991
ARHGDIA	15705.4	-1.6515e-07	0.00144269	0.856618	0.999991
ARHGDIB	7808.66	3.39247e-07	0.00144269	0.686848	0.999991
ARHGDIG	23.2601	-2.28353e-07	0.00144269	0.545536	0.999991
ARHGEF1	13635.2	1.68034e-07	0.00144269	0.894069	0.999991
ARHGEF10	4878.46	-6.08215e-07	0.00144269	0.482004	0.999991
ARHGEF10L	7234.15	-1.24814e-06	0.00144269	0.244772	0.999991
ARHGEF11	6916.46	-1.08204e-06	0.00144269	0.327502	0.999991
ARHGEF12	15358.1	-3.20023e-07	0.00144269	0.806926	0.999991
ARHGEF15	1527.33	-5.83419e-07	0.00144269	0.586998	0.999991
ARHGEF17	9070.17	-5.07459e-07	0.00144269	0.646898	0.999991
ARHGEF18	5963.51	6.38181e-07	0.00144269	0.642453	0.999991
ARHGEF19	1210.44	-4.96944e-07	0.00144269	0.617533	0.999991
ARHGEF2	11834.9	-2.00511e-08	0.00144269	0.983223	0.999991
ARHGEF25	1628.47	-1.02787e-06	0.00144269	0.250142	0.999991
ARHGEF26	2521.74	-5.86326e-07	0.00144269	0.411242	0.999991
ARHGEF28	1619.3	3.04379e-07	0.00144269	0.803811	0.999991
ARHGEF3	3115.97	-2.46322e-07	0.00144269	0.844368	0.999991
ARHGEF33	118.818	-4.28835e-07	0.00144269	0.497972	0.999991
ARHGEF34P	1115.76	2.1704e-07	0.00144269	0.740758	0.999991
ARHGEF35	640.598	1.77686e-07	0.00144269	0.782459	0.999991
ARHGEF37	1370.89	3.56629e-07	0.00144269	0.575017	0.999991
ARHGEF38	666.274	3.97844e-07	0.00144269	0.527718	0.999991
ARHGEF39	330.734	7.6956e-07	0.00144269	0.422435	0.999991
ARHGEF40	5965.58	-1.63511e-06	0.00144269	0.108771	0.999991
ARHGEF5	2096.71	4.74218e-07	0.00144269	0.516463	0.999991
ARHGEF6	6276.68	1.1414e-07	0.00144269	0.903021	0.999991
ARHGEF7	6675.72	5.30944e-07	0.00144269	0.655356	0.999991
ARHGEF9	1810.64	-8.0508e-08	0.00144269	0.93649	0.999991
ARID1A	104875	4.67607e-07	0.00144269	0.704415	0.999991
ARID1B	18952.3	9.19412e-08	0.00144269	0.940588	0.999991
ARID2	11265.7	3.17787e-07	0.00144269	0.807874	0.999991
ARID3A	1774.57	1.89937e-07	0.00144269	0.820613	0.999991
ARID3B	966.055	7.92699e-07	0.00144269	0.50428	0.999991
ARID4A	4168.06	2.57385e-07	0.00144269	0.836724	0.999991
ARID4B	11009.9	4.39491e-07	0.00144269	0.661121	0.999991
ARID5A	3388.52	8.23833e-08	0.00144269	0.926635	0.999991
ARID5B	6581.45	1.13898e-07	0.00144269	0.907358	0.999991
ARIH1	5395.22	-2.45684e-07	0.00144269	0.855992	0.999991
ARIH2	3593.02	8.35913e-09	0.00144269	0.993865	0.999991
ARIH2OS	45.4432	4.82246e-07	0.00144269	0.477321	0.999991
ARL1	4083.17	-5.33236e-07	0.00144269	0.691469	0.999991
ARL10	300.144	2.80048e-07	0.00144269	0.771126	0.999991
ARL11	194.797	1.5507e-08	0.00144269	0.990735	0.999991
ARL13B	1183.81	-3.68767e-07	0.00144269	0.752149	0.999991
ARL14EP	1949.76	4.42489e-07	0.00144269	0.736266	0.999991
ARL15	846.25	-6.50072e-07	0.00144269	0.551888	0.999991
ARL16	562.08	1.34925e-07	0.00144269	0.857161	0.999991
ARL17A	1157.18	-9.07775e-08	0.00144269	0.935708	0.999991
ARL17B	82.9095	-5.70571e-07	0.00144269	0.373823	0.999991
ARL2	1352.17	-3.31379e-07	0.00144269	0.787445	0.999991
ARL2BP	1546.49	-5.97696e-07	0.00144269	0.605974	0.999991
ARL3	1465.95	-3.36034e-07	0.00144269	0.753227	0.999991
ARL4A	588.82	6.51384e-08	0.00144269	0.953671	0.999991
ARL4C	2954.91	-3.81281e-07	0.00144269	0.593904	0.999991
ARL4D	112.621	-8.48686e-07	0.00144269	0.279616	0.999991
ARL5A	2754.93	-1.77324e-07	0.00144269	0.866654	0.999991
ARL5B	1320.46	-3.03029e-07	0.00144269	0.792897	0.999991
ARL6	401.74	2.07207e-07	0.00144269	0.832417	0.999991
ARL6IP1	5087.66	-4.20635e-07	0.00144269	0.710081	0.999991
ARL6IP4	3523.34	6.12957e-08	0.00144269	0.959651	0.999991
ARL6IP5	5163.98	-3.9075e-07	0.00144269	0.641556	0.999991
ARL6IP6	1592.93	-2.09934e-07	0.00144269	0.854324	0.999991
ARL8A	3323.07	-8.83552e-07	0.00144269	0.515818	0.999991
ARL8B	3398.49	-5.08814e-07	0.00144269	0.656497	0.999991
ARL9	33.8634	1.38115e-07	0.00144269	0.820994	0.999991
ARMC1	2693.43	2.26678e-07	0.00144269	0.848785	0.999991
ARMC10	2134.47	-1.74205e-07	0.00144269	0.83662	0.999991
ARMC12	86.2695	4.54643e-07	0.00144269	0.393912	0.999991
ARMC2	895.02	-2.99316e-07	0.00144269	0.78655	0.999991
ARMC3	98.7155	3.51776e-07	0.00144269	0.45386	0.999991
ARMC4	182.454	2.78052e-07	0.00144269	0.477727	0.999991
ARMC5	862.173	-4.23353e-07	0.00144269	0.722382	0.999991
ARMC6	1534.6	-2.58149e-07	0.00144269	0.837264	0.999991
ARMC7	532.372	-1.8193e-07	0.00144269	0.849572	0.999991
ARMC8	4184.14	3.83634e-08	0.00144269	0.976984	0.999991
ARMCX1	1400.28	-1.17946e-06	0.00144269	0.172897	0.999991
ARMCX2	2077.55	-8.4658e-07	0.00144269	0.327555	0.999991
ARMCX3	3466.26	-8.23269e-07	0.00144269	0.519399	0.999991
ARMCX4	982.41	-5.2612e-07	0.00144269	0.618855	0.999991
ARMCX5	746.2	4.04294e-08	0.00144269	0.97131	0.999991
ARMCX5-GPRASP2	45.9445	9.36916e-08	0.00144269	0.889493	0.999991
ARMCX6	574.826	-9.48365e-08	0.00144269	0.90531	0.999991
ARNT	4276.96	-4.82067e-07	0.00144269	0.650093	0.999991
ARNT2	2936.99	7.69487e-08	0.00144269	0.88209	0.999991
ARNTL	2088.13	-3.94107e-08	0.00144269	0.976972	0.999991
ARNTL2	1268.74	5.96725e-07	0.00144269	0.46342	0.999991
ARPC1A	6353.28	-2.02311e-07	0.00144269	0.836689	0.999991
ARPC1B	15043.5	-4.71639e-08	0.00144269	0.944913	0.999991
ARPC2	15386.5	2.86127e-07	0.00144269	0.792419	0.999991
ARPC3	5583.52	-1.02863e-07	0.00144269	0.933371	0.999991
ARPC4	1659.31	4.32207e-08	0.00144269	0.972803	0.999991
ARPC5	5778.85	-2.58647e-07	0.00144269	0.827631	0.999991
ARPC5L	1056.86	8.42235e-07	0.00144269	0.479518	0.999991
ARPP19	3338.29	1.90426e-07	0.00144269	0.878203	0.999991
ARRB1	4530.06	-3.58578e-07	0.00144269	0.647708	0.999991
ARRB2	6972.39	-1.25284e-06	0.00144269	0.188231	0.999991
ARRDC1	4534.37	-1.09859e-07	0.00144269	0.944846	0.999991
ARRDC2	1650.06	-2.95696e-07	0.00144269	0.818001	0.999991
ARRDC3	4443.87	-1.75438e-07	0.00144269	0.863653	0.999991
ARRDC4	1275.73	-9.16279e-07	0.00144269	0.414062	0.999991
ARRDC5	360.698	1.78627e-07	0.00144269	0.778073	0.999991
ARSA	3291.28	-1.03662e-06	0.00144269	0.384524	0.999991
ARSB	1592.6	-6.71709e-07	0.00144269	0.483072	0.999991
ARSD	2394.61	-1.73877e-06	0.00144269	0.142436	0.999991
ARSE	57.2672	-8.54934e-07	0.00144269	0.139335	0.999991
ARSG	1398.01	2.27087e-07	0.00144269	0.784579	0.999991
ARSJ	308.017	-4.18995e-07	0.00144269	0.653425	0.999991
ARSK	437.931	-5.62542e-07	0.00144269	0.585587	0.999991
ART1	26.9761	-4.10652e-07	0.00144269	0.146411	0.999991
ART3	597.111	3.31419e-07	0.00144269	0.26539	0.999991
ARTN	172.694	-7.70446e-07	0.00144269	0.282383	0.999991
ARV1	1232.96	3.23626e-07	0.00144269	0.748253	0.999991
ARVCF	2261.12	-1.06539e-08	0.00144269	0.99851	0.999991
ARX	50.2561	3.48707e-07	0.00144269	0.146987	0.999991
ASAH2	57.0322	3.68704e-07	0.00144269	0.371173	0.999991
ASAH2B	119.093	-1.75085e-07	0.00144269	0.772747	0.999991
ASAP1	12030.9	-7.22241e-07	0.00144269	0.594403	0.999991
ASAP2	5193.96	-9.95585e-07	0.00144269	0.354749	0.999991
ASAP3	2375.4	-1.42878e-06	0.00144269	0.120559	0.999991
ASB1	797.948	-3.30084e-07	0.00144269	0.780822	0.999991
ASB13	903.926	9.99824e-07	0.00144269	0.327684	0.999991
ASB14	27.7034	2.49188e-07	0.00144269	0.531677	0.999991
ASB16	90.9919	2.37771e-07	0.00144269	0.700242	0.999991
ASB16-AS1	589.201	4.97136e-07	0.00144269	0.689743	0.999991
ASB2	505.702	4.72283e-07	0.00144269	0.442218	0.999991
ASB3	144.448	2.14835e-07	0.00144269	0.821019	0.999991
ASB6	1551.14	2.16731e-07	0.00144269	0.86554	0.999991
ASB7	970.064	-7.82887e-08	0.00144269	0.950156	0.999991
ASB8	945.16	2.88065e-08	0.00144269	0.980383	0.999991
ASB9	75.9602	-2.70028e-07	0.00144269	0.657553	0.999991
ASCC1	1607.07	4.0566e-08	0.00144269	0.971459	0.999991
ASCC2	3763.41	-2.0203e-07	0.00144269	0.870089	0.999991
ASCC3	11508.1	-9.42191e-08	0.00144269	0.935629	0.999991
ASCL2	73.1667	-1.60716e-07	0.00144269	0.789887	0.999991
ASF1A	1287.49	2.41272e-07	0.00144269	0.796059	0.999991
ASF1B	663.715	1.37752e-06	0.00144269	0.117717	0.999991
ASGR1	136.754	-9.28063e-07	0.00144269	0.132597	0.999991
ASGR2	96.0158	-1.66466e-07	0.00144269	0.818847	0.999991
ASH1L	23414.5	2.50429e-07	0.00144269	0.800661	0.999991
ASH1L-AS1	244.834	5.50264e-07	0.00144269	0.491834	0.999991
ASH2L	3910.2	2.64085e-07	0.00144269	0.828488	0.999991
ASIC1	286.321	-3.57381e-07	0.00144269	0.690185	0.999991
ASIC2	52.7891	-4.377e-07	0.00144269	0.201198	0.999991
ASIC3	375.827	4.26695e-08	0.00144269	0.957394	0.999991
ASIC4	45.6345	-1.26686e-07	0.00144269	0.0787095	0.999991
ASL	3428.51	-4.86069e-07	0.00144269	0.687295	0.999991
ASMT	31.4519	-7.29322e-08	0.00144269	0.886038	0.999991
ASMTL	3361.06	-1.26274e-07	0.00144269	0.917305	0.999991
ASMTL-AS1	358.111	1.55253e-07	0.00144269	0.871211	0.999991
ASNA1	2990.48	-1.57698e-07	0.00144269	0.901548	0.999991
ASNS	2363.96	1.50077e-06	0.00144269	0.255784	0.999991
ASNSD1	2970.55	2.16305e-07	0.00144269	0.874774	0.999991
ASPA	154.812	2.54848e-07	0.00144269	0.789838	0.999991
ASPG	30.0161	3.20339e-07	0.00144269	0.527996	0.999991
ASPH	10440.5	-9.51816e-07	0.00144269	0.313145	0.999991
ASPHD1	111.493	-1.55411e-08	0.00144269	0.945777	0.999991
ASPHD2	455.619	4.44598e-07	0.00144269	0.601699	0.999991
ASPM	9350.24	1.09032e-06	0.00144269	0.30429	0.999991
ASPRV1	75.1874	-7.12197e-08	0.00144269	0.923947	0.999991
ASPSCR1	1877.45	-3.60514e-08	0.00144269	0.969253	0.999991
ASRGL1	223.816	-6.88417e-07	0.00144269	0.490412	0.999991
ASS1	1835.08	4.33925e-09	0.00144269	0.991953	0.999991
ASTE1	757.09	-7.16377e-08	0.00144269	0.953094	0.999991
ASTL	21.2888	2.15821e-08	0.00144269	0.976693	0.999991
ASTN2	1465.11	-1.64235e-07	0.00144269	0.788424	0.999991
ASUN	3317.2	1.88664e-07	0.00144269	0.832281	0.999991
ASXL1	45880	6.38072e-07	0.00144269	0.623121	0.999991
ASXL2	7890.2	3.93102e-08	0.00144269	0.979254	0.999991
ASXL3	266.602	-6.00334e-07	0.00144269	0.291387	0.999991
ATAD1	2579.23	3.46612e-07	0.00144269	0.789851	0.999991
ATAD2	12403.1	7.5684e-07	0.00144269	0.461184	0.999991
ATAD2B	6330.13	4.82947e-07	0.00144269	0.68887	0.999991
ATAD3A	2178.01	3.93447e-07	0.00144269	0.730598	0.999991
ATAD3B	2765.26	5.5182e-07	0.00144269	0.629472	0.999991
ATAD5	2048.04	8.38922e-07	0.00144269	0.416687	0.999991
ATAT1	1398.24	-5.31424e-08	0.00144269	0.964516	0.999991
ATE1	2851.97	2.73908e-08	0.00144269	0.980709	0.999991
ATE1-AS1	47.6633	-2.16556e-07	0.00144269	0.751285	0.999991
ATF1	1377.39	1.20841e-07	0.00144269	0.926337	0.999991
ATF2	4614.19	-1.78544e-07	0.00144269	0.877979	0.999991
ATF3	541.765	-6.78547e-07	0.00144269	0.361055	0.999991
ATF4	14793.8	3.51216e-07	0.00144269	0.774051	0.999991
ATF5	1856.06	5.87879e-08	0.00144269	0.948179	0.999991
ATF6	7862.89	1.15696e-08	0.00144269	0.993322	0.999991
ATF6B	5422.66	1.1969e-08	0.00144269	0.993259	0.999991
ATF7	2415.77	-6.50825e-07	0.00144269	0.618032	0.999991
ATF7IP	19337	1.44832e-07	0.00144269	0.916643	0.999991
ATF7IP2	1774.61	5.73821e-07	0.00144269	0.539927	0.999991
ATG10	540.689	-2.77595e-07	0.00144269	0.763815	0.999991
ATG101	1185.54	-1.75916e-07	0.00144269	0.88683	0.999991
ATG12	1097.11	3.03831e-07	0.00144269	0.815794	0.999991
ATG13	4789.42	-9.82452e-08	0.00144269	0.918252	0.999991
ATG14	1250.41	-2.36859e-07	0.00144269	0.822818	0.999991
ATG16L1	2143.73	1.07354e-07	0.00144269	0.928587	0.999991
ATG16L2	4384.6	-1.03788e-06	0.00144269	0.336132	0.999991
ATG2A	4075.36	-2.85104e-07	0.00144269	0.826043	0.999991
ATG2B	5978.98	-2.84495e-07	0.00144269	0.833545	0.999991
ATG3	3400.68	-3.35283e-07	0.00144269	0.756216	0.999991
ATG4A	925.954	2.30153e-07	0.00144269	0.860446	0.999991
ATG4B	2923.74	9.44282e-08	0.00144269	0.944286	0.999991
ATG4C	1878.3	-5.14292e-07	0.00144269	0.616335	0.999991
ATG4D	1389.7	3.74019e-07	0.00144269	0.722678	0.999991
ATG5	1658.84	-5.80758e-08	0.00144269	0.949564	0.999991
ATG7	3543.22	-1.38307e-06	0.00144269	0.262801	0.999991
ATG9A	2529.67	-7.74278e-07	0.00144269	0.546469	0.999991
ATG9B	116.107	5.74501e-07	0.00144269	0.433827	0.999991
ATHL1	5248.06	6.58145e-07	0.00144269	0.609739	0.999991
ATIC	4649.37	3.27335e-07	0.00144269	0.767676	0.999991
ATL1	443.279	-1.1047e-06	0.00144269	0.191782	0.999991
ATL2	4026.93	4.76471e-07	0.00144269	0.649866	0.999991
ATL3	6309.21	-5.55246e-07	0.00144269	0.615164	0.999991
ATM	180230	5.1534e-07	0.00144269	0.59301	0.999991
ATMIN	5550.86	-3.67423e-07	0.00144269	0.756419	0.999991
ATN1	26255.9	-3.03138e-07	0.00144269	0.789434	0.999991
ATOH8	340.906	8.67527e-07	0.00144269	0.257004	0.999991
ATOX1	2700.97	-2.41501e-07	0.00144269	0.818239	0.999991
ATP10A	3186.42	-1.53129e-06	0.00144269	0.0931346	0.999991
ATP10D	5117.57	-2.65005e-07	0.00144269	0.844706	0.999991
ATP11A	9765.06	-3.21473e-07	0.00144269	0.704931	0.999991
ATP11B	11360.4	3.05803e-07	0.00144269	0.817959	0.999991
ATP11C	4987.99	2.323e-07	0.00144269	0.830077	0.999991
ATP13A1	8250.08	2.60309e-07	0.00144269	0.845414	0.999991
ATP13A2	6104.11	-4.31498e-07	0.00144269	0.740205	0.999991
ATP13A3	15629.9	-2.08909e-07	0.00144269	0.858867	0.999991
ATP13A4	1198.77	1.12115e-07	0.00144269	0.815605	0.999991
ATP13A5	1516.87	2.78911e-07	0.00144269	0.326658	0.999991
ATP1A1	22804.7	-3.16577e-07	0.00144269	0.759485	0.999991
ATP1A1-AS1	135.598	5.92423e-07	0.00144269	0.534799	0.999991
ATP1A2	254.343	-1.32235e-06	0.00144269	0.10429	0.999991
ATP1A3	553.302	8.64054e-08	0.00144269	0.90029	0.999991
ATP1A4	49.0709	7.06603e-07	0.00144269	0.13297	0.999991
ATP1B1	9574.85	-1.12459e-06	0.00144269	0.138776	0.999991
ATP1B2	198.889	-4.65383e-09	0.00144269	0.990773	0.999991
ATP1B3	3714.65	-6.92332e-07	0.00144269	0.526723	0.999991
ATP2A1	209.645	1.2258e-07	0.00144269	0.892276	0.999991
ATP2A2	22449.5	-7.98384e-07	0.00144269	0.50576	0.999991
ATP2A3	14205.4	6.26599e-07	0.00144269	0.367955	0.999991
ATP2B1	8713.46	1.1559e-07	0.00144269	0.935495	0.999991
ATP2B2	45.5837	-9.00578e-08	0.00144269	0.866025	0.999991
ATP2B4	13576.6	-1.3048e-06	0.00144269	0.329323	0.999991
ATP2C1	10404.2	-6.39512e-07	0.00144269	0.59306	0.999991
ATP2C2	2387.18	5.50438e-07	0.00144269	0.4669	0.999991
ATP5A1	17935	-1.48114e-08	0.00144269	0.992127	0.999991
ATP5B	16492	3.45935e-08	0.00144269	0.977968	0.999991
ATP5C1	8953.79	-3.90525e-07	0.00144269	0.744616	0.999991
ATP5D	1473.5	1.23382e-07	0.00144269	0.919596	0.999991
ATP5E	281.439	-1.84491e-07	0.00144269	0.835207	0.999991
ATP5EP2	406.345	-1.30572e-09	0.00144269	0.997149	0.999991
ATP5F1	4225.11	1.32158e-07	0.00144269	0.91652	0.999991
ATP5G1	766.965	2.16955e-07	0.00144269	0.831076	0.999991
ATP5G2	3025.54	-2.46333e-08	0.00144269	0.986557	0.999991
ATP5G3	2652.53	-2.75787e-08	0.00144269	0.981622	0.999991
ATP5H	2910.5	-3.31417e-07	0.00144269	0.750806	0.999991
ATP5I	2702.42	-4.04698e-08	0.00144269	0.971066	0.999991
ATP5J	2613.31	-1.42006e-07	0.00144269	0.905978	0.999991
ATP5J2	331.986	9.86751e-08	0.00144269	0.904937	0.999991
ATP5L	5784.83	2.94435e-07	0.00144269	0.773143	0.999991
ATP5L2	191.302	7.72227e-07	0.00144269	0.455551	0.999991
ATP5O	4020.14	-2.3124e-08	0.00144269	0.984779	0.999991
ATP5S	663.933	6.57214e-07	0.00144269	0.556188	0.999991
ATP5SL	767.946	1.14064e-07	0.00144269	0.917302	0.999991
ATP6AP1	11445	-1.69535e-06	0.00144269	0.153977	0.999991
ATP6AP1L	236.617	1.27544e-07	0.00144269	0.893986	0.999991
ATP6AP2	8984.01	-2.1618e-06	0.00144269	0.095674	0.999991
ATP6V0A1	5818.62	-1.93347e-06	0.00144269	0.114533	0.999991
ATP6V0A2	2750.81	2.0297e-07	0.00144269	0.875618	0.999991
ATP6V0A4	482.243	-1.15046e-08	0.00144269	0.967035	0.999991
ATP6V0B	4444.34	-9.02084e-07	0.00144269	0.449145	0.999991
ATP6V0C	17885.3	-1.11373e-06	0.00144269	0.290004	0.999991
ATP6V0D1	3000.65	-9.51346e-07	0.00144269	0.38748	0.999991
ATP6V0D2	644.543	-4.61417e-07	0.00144269	0.231743	0.999991
ATP6V0E1	5467.31	-7.13145e-07	0.00144269	0.551557	0.999991
ATP6V0E2	1486.97	-1.21293e-07	0.00144269	0.8993	0.999991
ATP6V1A	5337.35	-1.22568e-06	0.00144269	0.348127	0.999991
ATP6V1B1	1040.66	1.33157e-07	0.00144269	0.86133	0.999991
ATP6V1B2	8035.58	-1.1961e-06	0.00144269	0.175202	0.999991
ATP6V1C1	7019.02	-8.74623e-07	0.00144269	0.435574	0.999991
ATP6V1C2	202.044	9.57607e-07	0.00144269	0.235951	0.999991
ATP6V1D	1448.12	-7.5158e-07	0.00144269	0.519249	0.999991
ATP6V1E1	2995.89	-4.35251e-07	0.00144269	0.735293	0.999991
ATP6V1E2	100.94	-1.73197e-07	0.00144269	0.845609	0.999991
ATP6V1F	3702.17	-7.97667e-07	0.00144269	0.443356	0.999991
ATP6V1G1	2718.52	3.15557e-08	0.00144269	0.969979	0.999991
ATP6V1G2	45.6469	-1.58515e-07	0.00144269	0.785094	0.999991
ATP6V1H	3136.84	-6.44683e-07	0.00144269	0.57687	0.999991
ATP7A	3712.02	-3.54379e-07	0.00144269	0.793544	0.999991
ATP7B	1144.97	-4.88249e-07	0.00144269	0.517051	0.999991
ATP8A1	4485.37	6.64007e-07	0.00144269	0.483075	0.999991
ATP8A2	36.5399	1.96432e-07	0.00144269	0.750976	0.999991
ATP8B1	6854.47	-2.66692e-07	0.00144269	0.7843	0.999991
ATP8B2	7524.64	-3.22743e-07	0.00144269	0.803968	0.999991
ATP8B3	579.807	-1.00143e-07	0.00144269	0.91451	0.999991
ATP8B4	1944.65	-1.20143e-06	0.00144269	0.285065	0.999991
ATP9A	8708.77	-1.02357e-06	0.00144269	0.399542	0.999991
ATP9B	4536.48	-1.27685e-07	0.00144269	0.911904	0.999991
ATPAF1	1451.42	2.73857e-07	0.00144269	0.794252	0.999991
ATPAF2	644.886	1.51312e-07	0.00144269	0.87904	0.999991
ATPIF1	1681.14	2.912e-07	0.00144269	0.79295	0.999991
ATR	65915.8	6.49892e-07	0.00144269	0.629464	0.999991
ATRAID	2474.15	-7.81206e-07	0.00144269	0.548963	0.999991
ATRIP	766.839	9.0426e-08	0.00144269	0.941869	0.999991
ATRN	5575.78	-1.25572e-06	0.00144269	0.290939	0.999991
ATRX	139128	4.12757e-07	0.00144269	0.762092	0.999991
ATXN1	7875.81	-1.43303e-06	0.00144269	0.250079	0.999991
ATXN10	4712.84	1.73657e-08	0.00144269	0.988067	0.999991
ATXN1L	3761.95	-1.73154e-07	0.00144269	0.858389	0.999991
ATXN2	9243.54	-8.98384e-08	0.00144269	0.94731	0.999991
[truncated: 15,041 more rows]

## Sheet: B_CBR_DEgenes
Supplementary Table 14. The results of DE analysis between CBR responders and non-responders at baseline performed by DESeq2.
Gene	baseMean	log2FoldChange	lfcSE	pvalue	padj
A1BG	3401.04	0.000249093	0.0665716	0.91425	0.998972
A1BG-AS1	353.461	0.000564865	0.0664736	0.894619	0.998972
A1CF	1890.55	-0.000388681	0.066608	0.615094	0.998972
A2M	46286	-0.00339149	0.0666355	0.357155	0.998972
A2M-AS1	35.3399	-0.000417117	0.0665017	0.926382	0.998972
A2ML1	225.311	0.000552004	0.0665978	0.717084	0.998972
A3GALT2	22.4447	-0.00492265	0.0667141	0.297637	0.998972
A4GALT	1219.29	-0.00113374	0.0664863	0.780099	0.998972
AAAS	1660.98	0.0125164	0.0676551	0.194642	0.998972
AACS	2450.59	-0.00414836	0.0666527	0.350419	0.998972
AADAC	1395.57	-0.000995522	0.066614	0.319876	0.998972
AADAT	871.829	0.00100427	0.0665423	0.762704	0.998972
AAED1	798.326	-0.00710699	0.0669837	0.135903	0.985899
AAGAB	2113.32	0.00871368	0.066949	0.29034	0.998972
AAK1	5290.03	-0.000289522	0.0662827	0.957668	0.998972
AAMDC	329.045	-0.000892423	0.066425	0.942308	0.998972
AAMP	3327.04	-0.000703219	0.0662638	0.910841	0.998972
AAR2	1079.02	0.00915177	0.0669394	0.319443	0.998972
AARD	4408.75	0.00202408	0.0666478	0.0940202	0.946357
AARS	8917.46	-0.00810388	0.0670946	0.164123	0.998972
AARS2	2118.1	-0.011006	0.067619	0.110043	0.960555
AASDH	2282.75	0.0123542	0.0680141	0.0628816	0.890082
AASDHPPT	1264.61	-0.00114744	0.0662494	0.864523	0.998972
AASS	2041.91	-0.0040501	0.0667288	0.184882	0.998972
AATF	2548.51	0.0186381	0.0695956	0.0884724	0.938954
AATK	571.988	-0.00120803	0.066587	0.579859	0.998972
ABAT	2024.57	0.00304069	0.0666832	0.16495	0.998972
ABCA1	11603.2	0.00108159	0.0664518	0.829116	0.998972
ABCA10	1208.83	-0.00935949	0.0674337	0.0788803	0.918155
ABCA11P	461.473	-0.00261394	0.0665442	0.542119	0.998972
ABCA12	4623.94	0.00140472	0.0666284	0.0493608	0.843245
ABCA13	269.192	-0.00154288	0.0666302	0.124698	0.978996
ABCA2	17576.2	0.00237149	0.066609	0.432852	0.998972
ABCA3	9694.04	0.00223501	0.0666226	0.377414	0.998972
ABCA4	951.898	0.00257417	0.0666696	0.109241	0.959721
ABCA5	3971.53	-0.00102997	0.0664747	0.806188	0.998972
ABCA6	4117.2	-0.0057423	0.0669218	0.058834	0.878381
ABCA7	5092.05	-0.00291578	0.0665983	0.433521	0.998972
ABCA8	2115.64	-0.00205858	0.0666191	0.37053	0.998972
ABCA9	1968.93	-0.00456029	0.0667791	0.137625	0.985899
ABCB1	1136.26	0.0006455	0.0665763	0.781166	0.998972
ABCB10	2172.14	-0.00035122	0.0663015	0.975692	0.998972
ABCB11	1205.09	-0.00213518	0.0666513	0.0983139	0.95269
ABCB4	2271.25	0.00158656	0.0666022	0.475666	0.998972
ABCB5	33.3119	-0.000820608	0.0665871	0.663184	0.998972
ABCB6	1759.23	-0.00131822	0.06649	0.729185	0.998972
ABCB7	2610.7	-0.00102418	0.0663058	0.866542	0.998972
ABCB8	2438.99	-0.00244714	0.0664866	0.617303	0.998972
ABCB9	947.189	0.00691373	0.0670789	0.0385846	0.778883
ABCC1	7149.76	0.000651963	0.0663563	0.919598	0.998972
ABCC10	6153.48	-0.00332376	0.066641	0.342143	0.998972
ABCC13	27.5656	-0.000527244	0.0666042	0.651433	0.998972
ABCC2	2340.16	0.0027078	0.0666754	0.112222	0.962841
ABCC3	6720.21	0.000655969	0.0664739	0.887752	0.998972
ABCC4	1785.94	0.00116214	0.0665567	0.710472	0.998972
ABCC5	10112.3	0.00515533	0.0668687	0.0497446	0.843245
ABCC6	1911.58	0.00131675	0.0666012	0.509634	0.998972
ABCC6P1	241.922	0.00141644	0.066615	0.368134	0.998972
ABCC6P2	48.8195	0.00125598	0.0666158	0.31593	0.998972
ABCC8	462.809	0.000657304	0.066612	1.73224e-05	0.0139031
ABCC9	3232.4	-0.00193628	0.0665682	0.55199	0.998972
ABCD1	3910.76	-0.0010491	0.0665	0.781787	0.998972
ABCD2	256.139	-0.00341104	0.0667292	0.0241648	0.648376
ABCD3	5622.35	0.00456299	0.0667115	0.288383	0.998972
ABCD4	2144.31	0.00385373	0.0664751	0.545867	0.998972
ABCE1	6276.66	0.00021074	0.0663995	0.977021	0.998972
ABCF1	4231.13	0.000449449	0.0660918	0.962213	0.998972
ABCF2	2816	-0.00702815	0.0668819	0.249261	0.998972
ABCF3	3901.11	-0.00500476	0.0664361	0.511326	0.998972
ABCG1	3222.6	0.00290828	0.0666258	0.38561	0.998972
ABCG2	440.046	0.000161955	0.0665069	0.969575	0.998972
ABCG4	31.6998	-0.00105537	0.0665613	0.701956	0.998972
ABCG5	603.841	-0.000716058	0.0665994	0.619178	0.998972
ABCG8	859.733	-1.18867e-05	0.0665954	0.990556	0.998972
ABHD1	98.9504	0.000751077	0.0665818	0.734185	0.998972
ABHD10	699.865	0.000504564	0.0662706	0.926533	0.998972
ABHD11	2104.35	0.00296955	0.0666015	0.443224	0.998972
ABHD12	2700.57	0.00482207	0.0666272	0.402142	0.998972
ABHD13	900.353	0.00319694	0.0664447	0.603326	0.998972
ABHD14A	446.04	0.00411326	0.0666321	0.412527	0.998972
ABHD14B	1493.38	0.00332746	0.0666219	0.399808	0.998972
ABHD15	624.754	0.00633409	0.0668948	0.18805	0.998972
ABHD16A	2708.71	-0.00416092	0.0659513	0.687031	0.998972
ABHD16B	17.2427	0.00136632	0.0665135	0.730951	0.998972
ABHD17A	1611	-0.00154934	0.0659861	0.8618	0.998972
ABHD17B	632.146	-0.0057971	0.0668266	0.249759	0.998972
ABHD17C	761.568	0.00620856	0.0668861	0.154926	0.993188
ABHD2	8247.05	-0.00154982	0.0665426	0.64872	0.998972
ABHD3	1374.41	0.00222974	0.0664764	0.662479	0.998972
ABHD4	1074.48	0.00626788	0.0666602	0.38483	0.998972
ABHD5	1299.13	-0.00104454	0.0664241	0.830489	0.998972
ABHD6	468.881	0.00158248	0.0665519	0.644472	0.998972
ABHD8	746.969	-0.0027759	0.0663036	0.713483	0.998972
ABI1	7207.06	-0.00236446	0.0665195	0.589049	0.998972
ABI2	3224.04	-0.00170526	0.0662858	0.796989	0.998972
ABI3	1249.76	0.0018464	0.0664103	0.747563	0.998972
ABI3BP	2721.91	0.00103268	0.0665409	0.761518	0.998972
ABL1	32482.2	-0.00361772	0.0664018	0.588826	0.998972
ABL2	7801.61	-0.000679741	0.0665418	0.80825	0.998972
ABLIM1	2345.63	-0.00503529	0.0667844	0.196192	0.998972
ABLIM2	617.999	-0.00175507	0.066602	0.450238	0.998972
ABLIM3	2020.22	0.00770516	0.0672073	0.0246157	0.656655
ABO	504.708	-0.00507458	0.0668603	0.0463784	0.826825
ABR	7883.31	0.00625517	0.0667126	0.352719	0.998972
ABRACL	2055.85	-0.00112426	0.0665742	0.645266	0.998972
ABT1	1072.79	-0.00110925	0.0661982	0.876686	0.998972
ABTB1	1840.16	-0.00131886	0.0663754	0.812312	0.998972
ABTB2	1357.57	0.000458581	0.0665538	0.884527	0.998972
ACAA1	2881.68	0.000501366	0.066528	0.89051	0.998972
ACAA2	3076.47	-0.00169886	0.0665881	0.519151	0.998972
ACACA	13696.9	0.00846322	0.0672254	0.104562	0.95349
ACACB	6990.86	-0.00138419	0.0665169	0.713487	0.998972
ACAD10	3192.28	0.00454673	0.0665617	0.460504	0.998972
ACAD11	72.1795	-0.0041512	0.066643	0.33555	0.998972
ACAD8	1401.84	-0.00833302	0.0672867	0.0369959	0.767041
ACAD9	4274.04	-0.00810025	0.0668264	0.321713	0.998972
ACADL	156.564	-0.00169349	0.06663	0.211658	0.998972
ACADM	3246.79	0.000188684	0.0665037	0.970037	0.998972
ACADS	782.021	-0.000383123	0.066493	0.915802	0.998972
ACADSB	4107.51	0.00293202	0.0666804	0.154248	0.993188
ACADVL	14931.7	-0.00444887	0.066448	0.524983	0.998972
ACAN	1780.25	-0.000741683	0.066578	0.718683	0.998972
ACAP1	778.393	-0.00247454	0.0666435	0.26565	0.998972
ACAP2	4548.9	-0.00195277	0.0660979	0.812692	0.998972
ACAP3	5620.19	-0.000319151	0.06646	0.932564	0.998972
ACAT1	4802.11	-0.000336274	0.0665438	0.897716	0.998972
ACAT2	1350.82	-0.00370578	0.066635	0.368054	0.998972
ACBD3	6448.73	0.00899878	0.0670784	0.241206	0.998972
ACBD4	1086.14	0.00257265	0.0664845	0.622271	0.998972
ACBD5	2963.44	-0.0114317	0.0678751	0.0367549	0.765797
ACBD6	2079.62	-0.00362711	0.0664669	0.551563	0.998972
ACBD7	132.603	-0.00329888	0.0667188	0.0366778	0.765797
ACCS	1095.35	0.00236066	0.0664725	0.933874	0.998972
ACD	869.491	-0.00168693	0.0664466	0.751662	0.998972
ACE	4043.01	-0.00463686	0.0667366	0.239266	0.998972
ACE2	628.544	-0.00132275	0.0666256	0.0731748	0.909634
ACER1	10.3253	0.000456278	0.0665768	0.829441	0.998972
ACER2	383.327	-0.0011403	0.0664644	0.797327	0.998972
ACER3	986.395	-0.00189936	0.0663134	0.881902	0.998972
ACHE	186.475	-0.00141317	0.066603	0.465377	0.998972
ACIN1	15515.4	0.00373378	0.0664642	0.560739	0.998972
ACKR1	349.936	-0.00254278	0.0666221	0.371846	0.998972
ACKR2	540.128	-0.00345784	0.0667359	0.0115524	0.510318
ACKR3	1124.83	0.0039791	0.0666898	0.285231	0.998972
ACKR4	160.235	0.00337872	0.0666926	0.215703	0.998972
ACLY	16464.2	-0.00220719	0.0664373	0.676634	0.998972
ACMSD	409.432	-0.000953504	0.0666103	0.414126	0.998972
ACN9	399.601	-0.0020642	0.0665966	0.463573	0.998972
ACO1	3516.22	-0.00490035	0.0667813	0.185666	0.998972
ACO2	9684.74	0.00443798	0.066454	0.53436	0.998972
ACOT1	309.434	0.000121399	0.0664551	0.984579	0.998972
ACOT11	909.591	-0.0116844	0.0680894	0.000977912	0.190024
ACOT12	396.381	0.00109693	0.0666025	0.494548	0.998972
ACOT13	786.219	-0.00390892	0.0665537	0.471761	0.998972
ACOT2	1326.98	0.00768448	0.0672098	0.0204843	0.606608
ACOT4	296.17	0.00802396	0.0672986	0.00329694	0.327213
ACOT7	1184.96	0.00189424	0.0664738	0.70233	0.998972
ACOT8	876.847	0.00147719	0.0663001	0.824269	0.998972
ACOT9	1511.12	-0.00324513	0.0664292	0.599129	0.998972
ACOX1	4556.79	0.000344782	0.0664048	0.954419	0.998972
ACOX2	1920.87	0.00145622	0.0666219	0.275176	0.998972
ACOX3	2354.91	-0.000217514	0.0664872	0.946212	0.998972
ACOXL	208.978	-0.00244225	0.0666731	0.00594117	0.40027
ACP1	1744.62	-0.00986948	0.0671336	0.249515	0.998972
ACP2	2490.66	-0.00239959	0.0662932	0.728649	0.998972
ACP5	2874.38	-0.00207708	0.0665712	0.531393	0.998972
ACP6	874.082	-0.00178593	0.0665674	0.569809	0.998972
ACPP	113.381	-0.00329414	0.0666382	0.35322	0.998972
ACR	55.9977	-0.00124879	0.0665623	0.63574	0.998972
ACRBP	213.06	0.000798129	0.06639	0.829367	0.998972
ACRC	697.274	-0.00536303	0.0666828	0.348593	0.998972
ACRV1	15.7363	-0.00246687	0.0666733	0.0196729	0.602588
ACSBG1	10.632	0.000948114	0.0666018	0.539771	0.998972
ACSF2	1557.83	0.000348157	0.0664531	0.948039	0.998972
ACSF3	2144.98	-0.00135801	0.0663136	0.872008	0.998972
ACSL1	9236.82	-0.000437477	0.0665601	0.85105	0.998972
ACSL3	10879.9	-0.00220805	0.0664619	0.659014	0.998972
ACSL4	4270.01	-9.56693e-05	0.0665029	0.967671	0.998972
ACSL5	2239.55	-0.000833169	0.0665704	0.72354	0.998972
ACSL6	323.503	-0.00223655	0.0666501	0.151237	0.990025
ACSM1	133.784	0.00113964	0.0665998	0.541563	0.998972
ACSM2A	2051.51	-0.000182571	0.0666019	0.908579	0.998972
ACSM2B	2117.25	-0.000609945	0.06661	0.408827	0.998972
ACSM3	651.229	-0.00118859	0.0665928	0.565125	0.998972
ACSM5	1256.29	-0.00107159	0.0665852	0.627866	0.998972
ACSM6	11.2623	0.000388321	0.0665924	0.723747	0.998972
ACSS1	2072.06	0.000127324	0.0665008	0.984944	0.998972
ACSS2	1605.89	0.00166694	0.0663154	0.804338	0.998972
ACSS3	1722.99	2.84481	1.86107	0.00150213	0.231077
ACTA1	1569.26	0.0012146	0.0665825	0.622516	0.998972
ACTA2	26131	0.00183005	0.0665268	0.656867	0.998972
ACTA2-AS1	22.4512	-0.000980092	0.0665108	0.782657	0.998972
ACTB	203435	-0.000102163	0.0662384	0.978911	0.998972
ACTBL2	8.12008	-0.000913892	0.0666104	0.397585	0.998972
ACTC1	247.209	0.00065464	0.066593	0.702457	0.998972
ACTG1	106870	-0.00265685	0.0663629	0.676098	0.998972
ACTL10	145.534	0.00959755	0.0675722	0.00772908	0.442823
ACTL6A	3173.98	-0.00180105	0.0664122	0.737214	0.998972
ACTL8	60.1174	-0.00243274	0.0666713	0.0168111	0.570467
ACTN1	40647.1	0.00202516	0.0665391	0.619954	0.998972
ACTN2	475.649	0.00119951	0.0665921	0.573371	0.998972
ACTN3	32.9491	-0.0021817	0.0666315	0.296172	0.998972
ACTN4	80249.3	0.00321942	0.0665772	0.482276	0.998972
ACTR10	2565.05	0.884935	0.405603	0.000801499	0.166819
ACTR1A	2448.24	-0.00412857	0.066196	0.636743	0.998972
ACTR1B	2876.74	0.00109626	0.0659698	0.909794	0.998972
ACTR2	14410.2	-0.000515038	0.0661909	0.937636	0.998972
ACTR3	13207.9	-0.000270284	0.066407	0.948031	0.998972
ACTR3B	1311.27	-0.00548026	0.0668741	0.0961148	0.946357
ACTR3C	1036.19	-0.00304449	0.0664827	0.508836	0.998972
ACTR5	696.257	0.0014071	0.0662739	0.842606	0.998972
ACTR6	1778.61	-9.48612e-05	0.0664136	0.995408	0.998972
ACTR8	1988.6	0.00192195	0.0662967	0.783649	0.998972
ACTRT3	120.114	0.00211235	0.0665625	0.567413	0.998972
ACVR1	2278.8	0.000143033	0.0663868	0.986256	0.998972
ACVR1B	1521.87	0.00664901	0.066876	0.138753	0.985899
ACVR1C	70.3866	-0.00381153	0.0667404	0.0950089	0.946357
ACVR2A	1847.68	0.00731006	0.0669427	0.225287	0.998972
ACVR2B	1030.85	0.000714467	0.0664029	0.899769	0.998972
ACVRL1	1575.08	0.000442683	0.066257	0.954221	0.998972
ACY1	13.8901	-4.95531e-05	0.0665696	0.976138	0.998972
ACY3	93.4915	-0.00300392	0.0666993	0.0519171	0.84972
ACYP1	616.93	0.00324151	0.0664316	0.608392	0.998972
ACYP2	230.303	-0.00379205	0.0666951	0.24328	0.998972
ADA	832.604	-0.00387636	0.0666076	0.411367	0.998972
ADAD2	14.442	0.00138171	0.0665439	0.672111	0.998972
ADAL	621.973	0.00258176	0.0665523	0.544225	0.998972
ADAM10	10476.8	-0.00336545	0.0664567	0.572324	0.998972
ADAM11	136.751	-0.00244981	0.0666223	0.331868	0.998972
ADAM12	4198.26	0.0063184	0.0669336	0.138231	0.985899
ADAM15	14732.8	-0.0024603	0.0665759	0.493081	0.998972
ADAM17	6194.08	-0.00871167	0.0672683	0.0942441	0.946357
ADAM19	2834.68	-0.000885587	0.0664705	0.830115	0.998972
ADAM1A	508.562	-0.000958915	0.0665054	0.888439	0.998972
ADAM20	447.403	0.00654618	0.0669366	0.241288	0.998972
ADAM20P1	80.2335	0.00154492	0.0665398	0.651011	0.998972
ADAM21	25.9985	-0.00300783	0.0666782	0.188074	0.998972
ADAM22	449.706	0.0015292	0.0665703	0.609297	0.998972
ADAM23	196.031	0.00443244	0.0667281	0.248212	0.998972
ADAM28	1658.51	-0.00196922	0.0665713	0.541483	0.998972
ADAM32	521.511	0.00509042	0.0668441	0.08916	0.940367
ADAM33	385.502	0.00216966	0.0666145	0.404804	0.998972
ADAM8	2674.46	-0.000885969	0.0665361	0.776058	0.998972
ADAM9	16995.8	0.00121791	0.0665381	0.735938	0.998972
ADAMDEC1	1316.57	-0.000774243	0.0665885	0.660419	0.998972
ADAMTS1	2570.82	-0.00102983	0.0664843	0.798314	0.998972
ADAMTS10	2688.87	0.00168333	0.0664901	0.713492	0.998972
ADAMTS12	4103.72	0.00227096	0.0665704	0.538374	0.998972
ADAMTS13	1368.03	-0.00375348	0.0666775	0.283076	0.998972
ADAMTS14	2537.65	0.00377279	0.0667203	0.171883	0.998972
ADAMTS15	1105.29	0.00164277	0.0666167	0.379207	0.998972
ADAMTS16	1739.87	0.00175709	0.0666294	0.253883	0.998972
ADAMTS17	785.909	0.00327405	0.0667014	0.129488	0.981432
ADAMTS18	292.709	-0.00163334	0.0666206	0.334644	0.998972
ADAMTS19	172.164	0.0010992	0.0666187	0.176354	0.998972
ADAMTS2	8465.63	0.00443999	0.0667343	0.234382	0.998972
ADAMTS3	195.102	-0.00183622	0.0665247	0.682099	0.998972
ADAMTS4	2210.45	-0.00134564	0.0665574	0.648828	0.998972
ADAMTS5	1624.82	-0.00267579	0.0665645	0.49987	0.998972
ADAMTS6	1235.57	0.00423175	0.0667256	0.227673	0.998972
ADAMTS7	1969.1	0.00150178	0.0665001	0.730792	0.998972
ADAMTS7P1	45.5293	0.000739988	0.0664704	0.865229	0.998972
ADAMTS8	104.657	-0.00136457	0.0666077	0.424791	0.998972
ADAMTS9	3698.04	-0.00336885	0.0666045	0.416614	0.998972
ADAMTSL1	816.1	-0.00169297	0.0665487	0.620645	0.998972
ADAMTSL2	1889.33	0.00175425	0.0665576	0.61316	0.998972
ADAMTSL3	1246.11	0.00194382	0.0665813	0.537212	0.998972
ADAMTSL4	3674.22	-0.00268672	0.0666379	0.315393	0.998972
ADAMTSL5	202.364	0.00379297	0.0667165	0.186615	0.998972
ADAP1	903.421	-0.00178924	0.0665876	0.511218	0.998972
ADAP2	1796.6	0.00224014	0.0662922	0.753482	0.998972
ADAR	29271.3	-0.000471663	0.0663376	0.927205	0.998972
ADARB1	3221.3	-0.000281471	0.0663603	0.95356	0.998972
ADARB2	42.979	0.000430369	0.0665804	0.837541	0.998972
ADAT1	1389.65	0.000517723	0.0663631	0.935013	0.998972
ADAT2	285.154	-0.00102786	0.0664585	0.828948	0.998972
ADAT3	402.97	-0.000784362	0.0662891	0.915504	0.998972
ADCK1	516.302	0.00473858	0.066612	0.414881	0.998972
ADCK2	2153.08	0.000304083	0.0663864	0.962967	0.998972
ADCK3	3227.34	-0.00213757	0.0665147	0.61707	0.998972
ADCK4	1638.56	0.00436025	0.066641	0.382817	0.998972
ADCK5	1113.24	0.0021083	0.0665345	0.613206	0.998972
ADCY1	3398.09	0.0018521	0.0666327	0.239734	0.998972
ADCY10	111.412	0.00193456	0.0665904	0.512796	0.998972
ADCY10P1	62.3178	-0.00193562	0.0666016	0.207341	0.998972
ADCY2	1006.59	0.000940795	0.0665984	0.592857	0.998972
ADCY3	5769.29	-0.00739145	0.0668695	0.116868	0.969382
ADCY4	1484.69	0.000889011	0.0663139	0.934203	0.998972
ADCY5	975.517	-0.000520945	0.0665627	0.828951	0.998972
ADCY6	8353.8	0.00427652	0.0667616	0.138652	0.985899
ADCY7	6108.15	0.00286922	0.0664998	0.587738	0.998972
ADCY8	5.8106	-0.000308255	0.0665986	0.805109	0.998972
ADCY9	4205.35	0.00288273	0.0665715	0.499595	0.998972
ADCYAP1	117.498	0.000761882	0.0665501	0.806464	0.998972
ADCYAP1R1	68.4163	-0.000967482	0.0665905	0.610945	0.998972
ADD1	10630.8	0.00242851	0.0662639	0.747457	0.998972
ADD2	611.539	-0.00260989	0.0666722	0.0919192	0.946357
ADD3	5154.38	-0.0010652	0.0664589	0.80883	0.998972
ADH1A	4484.68	-0.000619306	0.0666115	0.168427	0.998972
ADH1B	15603.3	-0.00247028	0.066674	0.0117804	0.514105
ADH1C	3095.62	-0.0015966	0.0666312	0.151056	0.990025
ADH4	5378.98	-0.0010641	0.0666188	0.132676	0.985681
ADH5	4023.26	-0.00398679	0.0666183	0.397419	0.998972
ADH6	1021.58	-0.000476424	0.066608	0.557742	0.998972
ADHFE1	1063.73	0.00345174	0.0666825	0.246426	0.998972
ADI1	2325.44	-0.0006475	0.0665382	0.826806	0.998972
ADIG	7.85833	0.00135251	0.0665983	0.533304	0.998972
ADIPOQ	99.014	-0.00220856	0.0666597	0.0274108	0.686783
ADIPOR1	4736.98	0.000737159	0.0660138	0.938799	0.998972
ADIPOR2	3747.2	0.00908209	0.0673569	0.0757884	0.913546
ADK	2582.05	-9.07467e-05	0.0664091	0.975872	0.998972
ADM	1058.41	-0.00339246	0.0667036	0.144394	0.988237
ADM2	328.681	-0.00222439	0.0665455	0.576073	0.998972
ADM5	93.0516	0.00274635	0.0665964	0.432157	0.998972
ADNP	12781.4	0.00560161	0.0665605	0.445429	0.998972
ADNP2	3014.61	0.000642953	0.0661182	0.941718	0.998972
ADO	756.989	-0.00775009	0.0668849	0.294582	0.998972
ADORA1	2258.66	-0.0019335	0.066638	0.179397	0.998972
ADORA2A	7.13166	-0.00227293	0.0666221	0.360587	0.998972
ADORA2A-AS1	22.0311	-0.000702703	0.0666089	0.489111	0.998972
ADORA2B	158.615	-0.00396131	0.0667386	0.129319	0.981432
ADORA3	399.441	0.00504526	0.0668078	0.171412	0.998972
ADPGK	2145.17	-0.0114006	0.0674722	0.194448	0.998972
ADPGK-AS1	10.4182	0.000386226	0.0665526	0.837731	0.998972
ADPRH	249.943	0.00142898	0.0663918	0.823994	0.998972
ADPRHL1	300.045	0.00176452	0.066573	0.584981	0.998972
ADPRHL2	997.385	-0.0168918	0.0695364	0.0122411	0.519474
ADPRM	256.026	0.00024239	0.0663452	0.928549	0.998972
ADRA1A	872.171	-0.00246629	0.0666699	0.0492633	0.843245
ADRA1B	138.015	-0.00122607	0.0665638	0.665095	0.998972
ADRA1D	13.4315	0.00264412	0.066647	0.274622	0.998972
ADRA2A	556.891	0.00574916	0.0668679	0.154727	0.993188
ADRA2B	63.5697	0.000176087	0.0665614	0.546207	0.998972
ADRA2C	366.503	0.00251853	0.0666586	0.187165	0.998972
ADRB1	41.7215	-0.00269744	0.0666715	0.132422	0.985681
ADRB2	354.114	-0.00149999	0.0664525	0.758345	0.998972
ADRBK1	13486.4	-0.00600178	0.0667192	0.33232	0.998972
ADRBK2	3739.75	0.00121396	0.0663996	0.832294	0.998972
ADRM1	5830.13	0.0028195	0.0663996	0.659716	0.998972
ADSL	2707.71	0.00180427	0.0662397	0.81083	0.998972
ADSS	8156.22	-0.00224447	0.0662687	0.748805	0.998972
ADSSL1	692.871	-0.00102955	0.0665147	0.774724	0.998972
ADTRP	66.8903	-0.00332337	0.0666846	0.22427	0.998972
AEBP1	68610	0.00457941	0.0667937	0.111101	0.962688
AEBP2	2419.48	0.00574911	0.0667202	0.334091	0.998972
AEN	902.611	-0.0038995	0.0663818	0.581124	0.998972
AES	9991.96	0.000819333	0.066417	0.8828	0.998972
AFAP1	3037.59	-0.00845121	0.0671615	0.146507	0.988237
AFAP1-AS1	162.437	-0.0027987	0.0666912	0.0173611	0.579328
AFAP1L1	1656.09	-0.000763321	0.0664142	0.874398	0.998972
AFAP1L2	988.785	-0.00140349	0.0664916	0.73451	0.998972
AFF1	9912.64	0.00148186	0.0663249	0.823535	0.998972
AFF2	278.495	-0.000170389	0.0665774	0.917144	0.998972
AFF3	6768.52	0.00193381	0.0666431	0.124332	0.978996
AFF4	9818.48	0.0153432	0.068464	0.131787	0.985681
AFG3L1P	155.327	-0.00221689	0.0664139	0.672793	0.998972
AFG3L2	5240.61	-0.00259289	0.0665875	0.463795	0.998972
AFM	3200.69	0.00050151	0.0666092	0.364718	0.998972
AFMID	1737.14	-0.000154939	0.066545	0.945532	0.998972
AFP	26.3478	0.00158935	0.0666323	0.101527	0.95349
AFTPH	5252.79	0.0002484	0.066276	0.977185	0.998972
AGA	973.642	5.2319e-05	0.0664055	0.996788	0.998972
AGAP1	5619.79	-0.00149616	0.0664051	0.776351	0.998972
AGAP11	548.461	0.000948488	0.0664948	0.817127	0.998972
AGAP2	821.834	-0.00103167	0.066497	0.790033	0.998972
AGAP2-AS1	587.911	0.000433494	0.0665142	0.941992	0.998972
AGAP3	6533.94	-0.00426775	0.0665376	0.474052	0.998972
AGAP4	517.395	9.41258e-05	0.0665247	0.923051	0.998972
AGAP6	3372.61	-0.00538551	0.0666299	0.391642	0.998972
AGAP7P	129.897	0.00079059	0.0665715	0.753209	0.998972
AGBL1	16.0713	0.000804733	0.0665961	0.631564	0.998972
AGBL2	339.718	0.00710819	0.0671147	0.0413757	0.796642
AGBL3	200.147	-0.00564887	0.0667331	0.298056	0.998972
AGBL4	145.273	-4.6732e-05	0.066576	0.970212	0.998972
AGBL5	1889.85	-0.00433369	0.0665643	0.378022	0.998972
AGER	456.17	-0.00607753	0.0667958	0.286927	0.998972
AGFG1	6980.18	-0.003718	0.0665017	0.520878	0.998972
AGFG2	1512.08	-0.00254044	0.066565	0.512733	0.998972
AGGF1	5529.93	0.00849285	0.0671579	0.158063	0.993188
AGK	1386.54	-0.00264912	0.0664679	0.616471	0.998972
AGL	11002	0.00397446	0.0667356	0.158642	0.993188
AGMAT	477.793	-0.00143968	0.0666035	0.465719	0.998972
AGMO	354.045	-0.000921942	0.066585	0.661335	0.998972
AGO1	3894.76	-0.0126746	0.0681346	0.0453643	0.824237
AGO2	11117.2	0.00146997	0.0665198	0.717705	0.998972
AGO3	4804.33	-0.0161665	0.0690196	0.0576143	0.874638
AGO4	3075.09	-1.20123	0.474859	0.000322522	0.0983191
AGPAT1	2130.61	-0.00399172	0.0659598	0.695184	0.998972
AGPAT2	2297.64	0.000543256	0.0664533	0.911937	0.998972
AGPAT3	4685.03	-0.00564629	0.0664649	0.48087	0.998972
AGPAT4	637.815	-0.00969853	0.0675708	0.0151521	0.543121
AGPAT4-IT1	99.9695	-0.00744717	0.0671849	0.0122013	0.518979
AGPAT5	1939.89	-0.00245085	0.0665901	0.463783	0.998972
AGPAT6	7153.93	-0.0015915	0.0665924	0.504179	0.998972
AGPAT9	291.688	3.27039e-05	0.0665539	0.998521	0.999324
AGPS	4178.64	0.000510808	0.0664461	0.922549	0.998972
AGR2	4785.47	0.0010039	0.0666177	0.109089	0.959721
AGR3	1349.64	0.00060162	0.0666111	0.0716037	0.902255
AGRN	25357.6	-0.00112813	0.0664959	0.770119	0.998972
AGT	5003.38	-0.00185613	0.0666388	0.141096	0.98797
AGTPBP1	3479.4	-0.00627003	0.0668932	0.176909	0.998972
AGTR1	376.106	0.00105885	0.066577	0.661264	0.998972
AGTRAP	1254.37	0.0010191	0.0664581	0.945883	0.998972
AGXT	5961.36	-8.27607e-05	0.066607	0.940059	0.998972
AGXT2	691.652	0.00121587	0.0666167	0.295217	0.998972
AHCTF1	17259.1	-0.0013418	0.0662573	0.839971	0.998972
AHCTF1P1	868.391	-0.0021796	0.0664094	0.746169	0.998972
AHCY	4209.74	0.000317817	0.0663791	0.962991	0.998972
AHCYL1	4248.93	0.00319594	0.0663235	0.664472	0.998972
AHCYL2	1104.12	-0.00879066	0.0669969	0.270732	0.998972
AHDC1	6598.9	-0.00141017	0.0664222	0.77895	0.998972
AHI1	6981.4	0.00365798	0.0665065	0.532457	0.998972
AHNAK	342997	0.0043935	0.0667117	0.279881	0.998972
AHNAK2	36572.8	0.000141723	0.0665559	0.981076	0.998972
AHR	8141.6	-0.00190231	0.0665513	0.589037	0.998972
AHRR	215.85	0.00150343	0.066582	0.586723	0.998972
AHSA1	3641.23	0.022549	0.0718379	0.0132801	0.533866
AHSA2	2631.56	0.00400774	0.0666023	0.428824	0.998972
AHSG	6403.32	-0.000464572	0.0666077	0.00163859	0.238643
AICDA	8.45419	0.00078651	0.0666114	0.364169	0.998972
AIDA	3724.84	0.00171058	0.0664404	0.747981	0.998972
AIF1	495.59	-0.000696093	0.0665218	0.917211	0.998972
AIF1L	1870.96	-0.00251162	0.0666573	0.17914	0.998972
AIFM1	2948.41	0.00239225	0.0664882	0.63714	0.998972
AIFM2	710.633	-0.0122286	0.0681455	0.0121368	0.51765
AIFM3	318.861	-0.00106481	0.0665527	0.711746	0.998972
AIG1	1609.77	-0.000653945	0.0664406	0.884754	0.998972
AIM1	10553.2	-0.000456235	0.0665583	0.840928	0.998972
AIM1L	530.744	0.000368089	0.0665749	0.878453	0.998972
AIM2	520.349	-0.000901935	0.0665922	0.609248	0.998972
AIMP1	2266.9	0.00353919	0.0664685	0.566932	0.998972
AIMP2	1158.22	0.00822045	0.0666064	0.405212	0.998972
AIP	1688.23	-0.00200162	0.0656909	0.853578	0.998972
AIRE	11.0084	-0.00304517	0.0666654	0.259454	0.998972
AJAP1	112.063	0.00343641	0.0666937	0.317588	0.998972
AJUBA	951.334	0.00358309	0.0666939	0.226887	0.998972
AK1	1322.48	-0.00674866	0.0667504	0.330962	0.998972
AK2	3375.29	-0.0106727	0.067646	0.0680699	0.893381
AK3	1694.9	-0.00128811	0.0664382	0.789916	0.998972
AK4	879.552	-0.00439378	0.066782	0.0955543	0.946357
AK5	227.673	-0.000887611	0.0665441	0.765908	0.998972
AK7	123.583	0.00180435	0.0666085	0.436882	0.998972
AK8	170.574	0.00105807	0.0665717	0.657415	0.998972
AK9	906.146	-0.00103346	0.0665478	0.728739	0.998972
AKAP1	6641.71	-0.0039509	0.0665889	0.431691	0.998972
AKAP10	2904.83	0.00472275	0.0664346	0.531164	0.998972
AKAP11	8108.43	0.00566531	0.0664229	0.506243	0.998972
AKAP12	1742.99	-0.00177245	0.0664886	0.689351	0.998972
AKAP13	18297.1	-0.00768431	0.0667927	0.328168	0.998972
AKAP14	6.49167	-0.00140987	0.0666252	0.171759	0.998972
AKAP17A	5306.55	-0.00406312	0.0666316	0.379701	0.998972
AKAP2	20.8474	-0.00306941	0.066579	0.468584	0.998972
AKAP3	161.693	-0.00440999	0.0668117	0.0145321	0.542001
AKAP5	197.619	0.00735414	0.0671277	0.0494091	0.843245
AKAP6	596.659	0.0014519	0.0664907	0.744632	0.998972
AKAP7	469.893	-0.00132939	0.0665498	0.673321	0.998972
AKAP8	2796.88	-0.00156958	0.0662542	0.818315	0.998972
AKAP8L	5528.07	-0.00165467	0.0664064	0.757608	0.998972
AKAP9	185554	-0.000105176	0.0662967	0.976808	0.998972
AKIP1	677.46	0.00677691	0.0668503	0.241419	0.998972
AKIRIN1	2408.36	-0.00618841	0.0668808	0.183878	0.998972
AKIRIN2	1097.38	0.00481228	0.0665582	0.457443	0.998972
AKNA	5582.52	-0.0049548	0.0667698	0.212639	0.998972
AKNAD1	11.041	0.00166404	0.0666151	0.35272	0.998972
AKR1A1	3981.31	-0.0148664	0.0687949	0.0259738	0.673347
AKR1B1	756.005	-0.00332769	0.0664536	0.542124	0.998972
AKR1B10	134.94	0.00107261	0.0666106	0.40432	0.998972
AKR1C1	2060.16	-0.00347899	0.0667365	0.0150332	0.542016
AKR1C2	1487.26	-0.00236843	0.0666273	0.346649	0.998972
AKR1C3	1270.45	-0.00385294	0.0666874	0.282512	0.998972
AKR1C4	1279.67	-5.01991e-05	0.0666065	0.921202	0.998972
AKR1CL1	128.587	3.69307e-05	0.0665802	0.98602	0.998972
AKR1D1	547.161	0.00150006	0.0666285	0.135392	0.985899
AKR1E2	865.326	-0.00329722	0.0667175	0.0440703	0.812156
AKR7A2	3385.34	0.000692956	0.0663946	0.905841	0.998972
AKR7A3	1204.27	0.00138837	0.0666099	0.426971	0.998972
AKR7L	354.022	0.00139543	0.0666009	0.699014	0.998972
AKT1	70637.1	0.00329656	0.0666175	0.412364	0.998972
AKT1S1	1491.08	0.00585535	0.0667346	0.324431	0.998972
AKT2	33500.3	0.00513023	0.0667197	0.312485	0.998972
AKT3	24203.2	-0.00409523	0.066656	0.342696	0.998972
AKTIP	1344.02	0.00461792	0.0666231	0.405046	0.998972
ALAD	1253.91	1.84671e-05	0.0663798	0.984177	0.998972
ALAS1	2981.95	-0.000506699	0.0664668	0.897997	0.998972
ALB	162821	-8.81133e-05	0.0665892	0.96317	0.998972
ALCAM	8438.26	0.00284591	0.0666678	0.212698	0.998972
ALDH16A1	2013.42	0.0065617	0.0668384	0.262407	0.998972
ALDH18A1	4350.54	-0.0043343	0.0664003	0.553179	0.998972
ALDH1A1	2983.53	-0.00142978	0.0665709	0.61203	0.998972
ALDH1A2	89.1508	-0.0022766	0.0666218	0.340271	0.998972
ALDH1A3	1992.09	-0.0055944	0.0668885	0.0892992	0.940367
ALDH1B1	2260.4	7.64063e-05	0.0665553	0.992243	0.998972
ALDH1L1	2021.71	-0.00177759	0.0666403	0.0567517	0.868709
ALDH1L2	2397.3	-0.00156492	0.0665205	0.678375	0.998972
ALDH2	15385.2	-0.00132957	0.0665727	0.617301	0.998972
ALDH3A1	15.5415	0.00142695	0.0666091	0.423317	0.998972
ALDH3A2	4045.01	0.00428217	0.0666347	0.38956	0.998972
ALDH3B1	1359.81	-0.00306603	0.0665294	0.530663	0.998972
ALDH3B2	9452.19	0.000485156	0.0665953	0.769095	0.998972
ALDH4A1	2468.26	0.00134142	0.0665933	0.55455	0.998972
ALDH5A1	774.934	0.00244449	0.0665572	0.550776	0.998972
ALDH6A1	3175.26	0.0014483	0.0665855	0.577162	0.998972
ALDH7A1	4913.48	0.00303049	0.0666126	0.420117	0.998972
ALDH8A1	916.459	0.000718194	0.0665721	0.758128	0.998972
ALDH9A1	3687.19	-0.00509799	0.0666081	0.408012	0.998972
ALDOA	48383.5	0.00257113	0.0665516	0.552885	0.998972
ALDOB	13157.8	-0.000803355	0.0666115	0.335382	0.998972
ALDOC	663.563	-0.00231817	0.0666368	0.283034	0.998972
ALG1	1485.05	0.007363	0.0668072	0.414808	0.998972
ALG10	1450.87	0.00543465	0.0666722	0.262854	0.998972
ALG10B	1337.46	0.0213484	0.0713227	0.0110848	0.504839
ALG11	731.497	0.00302851	0.0659137	0.76868	0.998972
ALG12	2969.69	-0.00313452	0.0664573	0.663349	0.998972
ALG13	5819.09	0.00682725	0.0667841	0.319152	0.998972
ALG14	358.309	-0.000165186	0.0663922	0.887666	0.998972
ALG1L	107.509	0.00488371	0.0668344	0.067158	0.893182
ALG1L2	56.7097	-0.000475846	0.0665875	0.766176	0.998972
ALG1L9P	119.862	0.00186488	0.0665764	0.546472	0.998972
ALG2	1367.09	-0.0056286	0.0665435	0.422583	0.998972
ALG3	1466.68	-0.00418517	0.0665424	0.473166	0.998972
ALG5	1853.56	-0.0014905	0.0663266	0.808143	0.998972
ALG6	1508.92	-0.00566004	0.0668228	0.205166	0.998972
ALG8	2145.46	0.000803632	0.0664664	0.866237	0.998972
ALG9	1241.89	-0.0103455	0.06746	0.114459	0.96641
ALK	375.401	-0.00118011	0.0665634	0.669307	0.998972
ALKBH1	567.681	0.00774611	0.0670969	0.12688	0.97969
ALKBH2	394.24	0.0027949	0.0663997	0.643994	0.998972
ALKBH3	663.428	0.00218714	0.0665445	0.59299	0.998972
ALKBH4	414.842	-0.0018324	0.0664884	0.680644	0.998972
ALKBH5	4247.93	0.00135469	0.0662699	0.850228	0.998972
ALKBH6	549.375	0.00256746	0.0665707	0.453382	0.998972
ALKBH7	648.635	-0.000170142	0.0664472	0.963698	0.998972
ALKBH8	944.915	0.00881078	0.0669371	0.312543	0.998972
ALLC	16.7383	-0.000924598	0.0665911	0.628026	0.998972
ALMS1	16085.3	0.000225028	0.0658318	0.987218	0.998972
ALMS1P	91.8568	0.0058928	0.0668505	0.195289	0.998972
ALOX12B	13.5224	-0.00225684	0.0666447	0.247939	0.998972
ALOX15	135.67	0.00305889	0.0667036	0.0419656	0.799758
ALOX15P1	40.9661	-0.00301283	0.0666842	0.142309	0.988237
ALOX5	3126.31	-0.00360836	0.0666819	0.257975	0.998972
ALOX5AP	855.172	0.00100438	0.066559	0.73432	0.998972
ALOXE3	57.8433	0.00111387	0.0666098	0.413643	0.998972
ALPK1	2502.25	-0.00914791	0.0673522	0.082903	0.924706
ALPK2	1494.88	0.00381019	0.0667142	0.196138	0.998972
ALPK3	1273.82	0.000398054	0.0664652	0.936028	0.998972
ALPL	1368.64	-0.00202316	0.0666228	0.34159	0.998972
ALPP	77.9996	4.58596e-05	0.0666067	0.93166	0.998972
ALS2	3799	-0.00183573	0.0659771	0.839503	0.998972
ALS2CL	1697.43	-0.00139082	0.0665658	0.624867	0.998972
ALS2CR12	202.663	0.00123748	0.0663898	0.819703	0.998972
ALX4	14.2065	-0.00236492	0.0666554	0.156862	0.993188
ALYREF	1492.21	-0.00260475	0.0663846	0.753486	0.998972
AMACR	91.9583	0.000710189	0.066465	0.870069	0.998972
AMBP	11109.6	0.00148641	0.0666271	0.1626	0.998868
AMBRA1	4161.67	0.00400804	0.0660037	0.632038	0.998972
AMD1	6053.32	-0.00215666	0.0666053	0.424311	0.998972
AMDHD1	791.891	0.00145518	0.0666069	0.444286	0.998972
AMDHD2	2427.04	0.000777434	0.0663913	0.894217	0.998972
AMER1	1203.95	-0.00398534	0.066713	0.217046	0.998972
AMER2	8.65571	-0.000629753	0.0666116	0.174034	0.998972
AMFR	7202.88	0.017346	0.0697608	0.00695618	0.430189
AMH	565.505	-0.000834614	0.0665892	0.648531	0.998972
AMHR2	12.9139	0.00217161	0.0666514	0.118341	0.973519
AMICA1	347.384	-0.0038891	0.0667443	0.100166	0.95349
AMIGO1	374.425	-0.000630209	0.0664945	0.851126	0.998972
AMIGO2	1884.63	0.00514772	0.0668742	0.0354073	0.757715
AMIGO3	420.204	-0.0100463	0.0675239	0.071126	0.900722
AMMECR1	488.582	-0.00433398	0.0666771	0.412355	0.998972
AMMECR1L	1106.45	0.00846415	0.0667157	0.367985	0.998972
AMN	165.223	0.000146406	0.0665844	0.938427	0.998972
AMN1	412.82	0.00214727	0.0665377	0.579719	0.998972
AMOT	1610.53	-0.00224303	0.0666157	0.385481	0.998972
AMOTL1	4979.8	-0.00181748	0.0665333	0.627844	0.998972
AMOTL2	2805.56	0.00185295	0.0665248	0.655648	0.998972
AMPD1	73.6774	-0.00196839	0.0666501	0.0097974	0.490135
AMPD2	3771.11	-0.000380548	0.0663644	0.938672	0.998972
AMPD3	2103.18	0.000746097	0.0665002	0.858259	0.998972
AMPH	280.828	0.00246086	0.066666	0.0912727	0.945909
AMT	793.249	0.00559977	0.0667521	0.295338	0.998972
AMTN	413.419	-0.00121497	0.0666237	0.0325267	0.736308
AMY1B	6.05987	-0.00204379	0.0666488	0.0854191	0.932266
AMY2A	26.7981	-0.00110039	0.066609	0.420488	0.998972
AMY2B	1644.36	0.00291609	0.0665414	0.537765	0.998972
AMZ1	215.872	0.00138041	0.0666082	0.436916	0.998972
AMZ2	4891.71	0.00118966	0.0665262	0.754231	0.998972
AMZ2P1	389.386	0.00184985	0.0664484	0.730382	0.998972
ANAPC1	7834.84	0.00280899	0.0660997	0.755467	0.998972
ANAPC10	946.683	0.00146034	0.0663016	0.839237	0.998972
ANAPC11	1581.69	0.00222611	0.0663453	0.736519	0.998972
ANAPC13	963.793	0.00463234	0.0662605	0.618317	0.998972
ANAPC15	549.659	-0.000605762	0.0663564	0.855404	0.998972
ANAPC16	1171.7	-0.00467876	0.0665329	0.480241	0.998972
ANAPC1P1	149.341	0.000266859	0.0664944	0.987146	0.998972
ANAPC2	4838.63	-0.00285555	0.0665378	0.531893	0.998972
ANAPC4	2891.43	0.00170672	0.0658969	0.866067	0.998972
ANAPC5	6782.89	0.0076583	0.0667919	0.335734	0.998972
ANAPC7	3301.44	0.00880712	0.0670023	0.269405	0.998972
ANG	1809.22	-0.000931944	0.0665886	0.635368	0.998972
ANGEL1	1275.97	0.0085564	0.0670125	0.265384	0.998972
ANGEL2	2514.38	0.00719088	0.066721	0.42631	0.998972
ANGPT2	798.882	-0.00444274	0.0667046	0.281576	0.998972
ANGPTL1	212.344	-0.00609633	0.0669307	0.106824	0.957406
ANGPTL2	2811.04	0.00188276	0.0665636	0.563297	0.998972
ANGPTL3	3494.56	0.000280911	0.066606	0.727477	0.998972
ANGPTL4	991.464	-0.00339828	0.0667273	0.0329054	0.736308
ANGPTL6	124.629	0.00126679	0.066576	0.62909	0.998972
ANK1	397.04	-0.00092779	0.0665924	0.598108	0.998972
ANK2	1161	-0.00682707	0.0669741	0.145168	0.988237
ANK3	5598.43	-0.00074397	0.0665498	0.786058	0.998972
ANKAR	1255.97	0.00571796	0.0666616	0.37892	0.998972
ANKDD1A	196.427	-0.00549953	0.0668527	0.133756	0.985899
ANKDD1B	122.134	0.000822366	0.0665061	0.816665	0.998972
ANKEF1	894.239	0.00294663	0.0665224	0.629535	0.998972
ANKFY1	4081.12	0.000455881	0.0659388	0.96608	0.998972
ANKH	4026.47	0.00115059	0.066512	0.775264	0.998972
ANKHD1	208.544	0.00565688	0.0666349	0.396812	0.998972
ANKHD1-EIF4EBP3	38.0477	0.00487907	0.0667771	0.192122	0.998972
ANKIB1	8732.92	-0.00795989	0.0668197	0.321515	0.998972
ANKK1	45.1294	-0.00223019	0.0666056	0.433713	0.998972
ANKLE1	119.211	-0.00380692	0.0667054	0.213144	0.998972
ANKLE2	7868.86	-0.00874557	0.0671136	0.20086	0.998972
ANKMY1	2766.27	-0.00121153	0.0665124	0.742883	0.998972
ANKMY2	1341.8	0.000351712	0.0663452	0.958358	0.998972
ANKRA2	1103.84	0.00631083	0.0667999	0.421897	0.998972
ANKRD1	65.9949	-8.42421e-05	0.0665824	0.956977	0.998972
ANKRD10	6723.56	0.00133665	0.0664261	0.805239	0.998972
ANKRD11	16773	-0.00401208	0.0664107	0.563002	0.998972
ANKRD12	12082.4	0.00236771	0.0665006	0.629729	0.998972
ANKRD13A	2573.2	0.000344888	0.0663877	0.957212	0.998972
ANKRD13B	1433.34	-0.002478	0.0666141	0.394603	0.998972
ANKRD13C	2383.73	0.00168719	0.0660286	0.854501	0.998972
ANKRD13D	5276.69	-0.00160242	0.0664872	0.710295	0.998972
ANKRD16	637.386	-0.00892146	0.0673109	0.0841508	0.930422
ANKRD17	25880.4	-0.00202502	0.0658327	0.838756	0.998972
ANKRD18A	1230.69	-0.00147398	0.0666043	0.448839	0.998972
ANKRD18B	287.994	0.00149718	0.0666117	0.414927	0.998972
ANKRD19P	35.4359	-0.000918017	0.0665701	0.704381	0.998972
ANKRD2	25.6704	0.00114924	0.066589	0.606813	0.998972
ANKRD20A11P	87.2879	-0.00156056	0.0664974	0.707661	0.998972
ANKRD20A5P	646.991	0.00272895	0.0666781	0.101051	0.95349
ANKRD20A8P	165.862	0.00284239	0.066695	0.0109033	0.504839
ANKRD22	158.568	0.00291399	0.0666325	0.308542	0.998972
ANKRD23	562.1	-0.000979598	0.0664651	0.820293	0.998972
ANKRD24	283.869	-0.000271208	0.0665383	0.994039	0.998972
ANKRD26	6507.46	-0.00677815	0.0669042	0.21238	0.998972
ANKRD26P1	8.36515	0.000608754	0.0665939	0.707294	0.998972
ANKRD27	4384.85	0.00268204	0.0666062	0.437914	0.998972
ANKRD28	5263.8	0.00494263	0.0664955	0.493892	0.998972
ANKRD29	132.327	-0.00134659	0.0665841	0.593418	0.998972
ANKRD30B	6998.69	0.000815213	0.0666144	0.0869887	0.93611
ANKRD31	240.363	0.00168428	0.0665968	0.505393	0.998972
ANKRD32	1712.25	0.00616832	0.0668641	0.313507	0.998972
ANKRD33B	134.959	-0.00353727	0.066664	0.30306	0.998972
ANKRD34A	145.547	-0.00106715	0.0665217	0.762758	0.998972
ANKRD34B	22.1653	-0.000842046	0.0666106	0.384485	0.998972
ANKRD35	83.9898	-0.00391556	0.0667322	0.19288	0.998972
ANKRD36	17241.9	-0.00233618	0.0662782	0.737137	0.998972
ANKRD36B	9397.95	0.00125498	0.0659155	0.953443	0.998972
ANKRD36C	21249.6	-0.00140594	0.0664932	0.729071	0.998972
ANKRD37	405.838	0.000220383	0.0665281	0.954883	0.998972
ANKRD39	400.078	-0.000375309	0.0663124	0.932523	0.998972
ANKRD40	4248.39	0.00141257	0.0665299	0.712866	0.998972
ANKRD42	990.992	0.008742	0.0673701	0.0284895	0.700175
ANKRD44	2921.66	-0.00245586	0.0665695	0.508825	0.998972
ANKRD45	25.9525	-0.00199149	0.0665811	0.517266	0.998972
ANKRD46	711.605	0.0044627	0.0667008	0.29868	0.998972
ANKRD49	530.665	-0.000802783	0.0663564	0.885236	0.998972
ANKRD50	8076.34	0.00140023	0.0662542	0.847458	0.998972
ANKRD52	4407.2	0.00594645	0.0666632	0.381444	0.998972
ANKRD53	81.9503	-0.0136821	0.0684608	0.0225939	0.626152
ANKRD54	677.502	0.00119954	0.0664649	0.802755	0.998972
ANKRD55	23.8915	-0.00102777	0.0665963	0.566216	0.998972
ANKRD6	1238.01	-0.00334395	0.0666339	0.362088	0.998972
ANKRD61	16.6653	0.0036244	0.0666642	0.331718	0.998972
ANKRD62	39.6007	-0.00307302	0.0666786	0.177933	0.998972
ANKRD62P1-PARP4P3	11.1482	0.000828499	0.0666082	0.480278	0.998972
ANKRD63	5.60574	0.000173776	0.0665951	0.892398	0.998972
ANKRD65	137.624	-0.00684419	0.0671081	0.00444063	0.368946
ANKRD7	26.0641	-0.000302521	0.0665729	0.882875	0.998972
ANKRD9	847.708	0.00354013	0.0665688	0.478159	0.998972
ANKS1A	5035.91	-0.00134358	0.0662574	0.840731	0.998972
ANKS1B	3568.13	0.0041101	0.066782	0.0293087	0.710105
ANKS3	1522.62	-0.000752215	0.0664581	0.859606	0.998972
ANKS4B	64.3453	-0.000644804	0.0666006	0.648741	0.998972
ANKS6	822.289	0.00584595	0.0668617	0.176786	0.998972
ANKZF1	1880.75	-0.0258352	0.0736097	0.00868384	0.46705
ANLN	6679.84	-0.00010298	0.0665251	0.957546	0.998972
ANO1	8428.95	0.000629942	0.0665276	0.865592	0.998972
ANO10	2347.69	0.00136608	0.0663537	0.827688	0.998972
ANO2	423.669	0.0024413	0.0665905	0.482702	0.998972
ANO3	94.6903	0.0021191	0.0666486	0.135692	0.985899
ANO4	79.5369	-0.0016951	0.0666136	0.373515	0.998972
ANO5	316.738	0.00232148	0.0666594	0.0953632	0.946357
ANO6	7210.19	-0.00149648	0.0662335	0.830125	0.998972
ANO8	3527.12	-0.00348701	0.0665844	0.446436	0.998972
ANO9	2645.54	0.00153817	0.0665448	0.67203	0.998972
ANP32A	5884.27	-0.000876325	0.0657888	0.927524	0.998972
ANP32B	6045.01	-0.0105142	0.0673744	0.182731	0.998972
ANP32C	116.54	-0.00262694	0.0665291	0.562089	0.998972
ANP32D	15.3801	-0.00558511	0.0668657	0.121456	0.977365
ANP32E	3029.19	-0.00377749	0.0667009	0.222208	0.998972
ANPEP	10434.6	-0.000131805	0.0665713	0.928171	0.998972
ANTXR1	10191	0.00579104	0.0668832	0.137367	0.985899
ANTXR2	1228.65	-0.0053957	0.0665598	0.440907	0.998972
ANXA1	7840.44	-0.00548038	0.0668866	0.072828	0.90861
ANXA10	150.793	0.000511894	0.0666055	0.654531	0.998972
ANXA11	7370.63	-0.00236894	0.0664419	0.659142	0.998972
ANXA13	17.9333	-0.00157449	0.0666246	0.211743	0.998972
ANXA2	28665.7	-0.00373665	0.0665521	0.474969	0.998972
ANXA2P1	154.663	-0.000828896	0.0664328	0.721546	0.998972
ANXA2P2	2231.32	-0.00277218	0.066457	0.613965	0.998972
ANXA2R	226.745	-0.011496	0.0679232	0.0412294	0.796642
ANXA3	1561.98	-0.00121734	0.0666047	0.461426	0.998972
ANXA4	2799.63	0.00357031	0.0664728	0.562773	0.998972
ANXA5	12984.7	-0.00810502	0.0669315	0.740854	0.998972
ANXA6	8264.34	0.00579244	0.0666369	0.398952	0.998972
ANXA7	4623.46	-0.00392432	0.0662334	0.637203	0.998972
ANXA8	31.7065	-0.000848862	0.0666104	0.374868	0.998972
ANXA8L1	63.3966	-0.000631016	0.0666102	0.233561	0.998972
ANXA8L2	116.015	-0.000659457	0.0666077	0.45832	0.998972
ANXA9	865.98	0.00349326	0.0667275	0.062935	0.890082
AOAH	1059.62	-0.00287255	0.0666161	0.394564	0.998972
AOC1	159.401	0.00108081	0.0665925	0.602031	0.998972
AOC2	375.936	-0.00855445	0.0670486	0.227271	0.998972
AOC3	1675.27	-0.0179998	0.0701732	0.000321521	0.0983191
AOC4P	123.16	-0.00354809	0.0667204	0.106054	0.957406
AOX1	12515	-0.00230544	0.0666488	0.195957	0.998972
AP1AR	1931.38	0.00146623	0.066373	0.808903	0.998972
AP1B1	9762.32	0.00855353	0.0668981	0.308592	0.998972
AP1G1	6362.21	0.00205996	0.0662695	0.778735	0.998972
AP1G2	4719.5	0.00247753	0.0665293	0.586574	0.998972
AP1M1	2810.63	-0.00472508	0.0662328	0.595875	0.998972
AP1M2	3475.45	0.00152309	0.0665502	0.665023	0.998972
AP1S1	1499.93	-0.00277007	0.0665848	0.395031	0.998972
AP1S2	1518.67	-0.000157869	0.0664683	0.930227	0.998972
AP1S3	307.939	0.00224425	0.0665423	0.585902	0.998972
AP2A1	11035.5	0.00411187	0.0664548	0.547458	0.998972
AP2A2	8968.04	0.00179385	0.0661733	0.825446	0.998972
AP2B1	10099.7	0.00436285	0.0665003	0.509756	0.998972
AP2M1	11530.8	-0.00686818	0.0665629	0.422895	0.998972
AP2S1	3845.54	0.00382605	0.0666761	0.305603	0.998972
AP3B1	7016.68	0.00666492	0.0662885	0.519265	0.998972
AP3B2	635.978	-0.00191824	0.0666449	0.0656205	0.892337
AP3D1	14663.1	-0.00556657	0.0665592	0.435835	0.998972
AP3M1	3349.24	-0.00138626	0.0662503	0.838064	0.998972
AP3M2	1629.46	-0.00272053	0.0665943	0.424689	0.998972
AP3S1	3100.68	0.00603571	0.0666954	0.360199	0.998972
AP3S2	83.5797	0.0011116	0.0663304	0.847641	0.998972
AP4B1	1258.59	-0.00381377	0.0665119	0.407419	0.998972
AP4E1	1917.41	0.00823127	0.0670553	0.207959	0.998972
AP4M1	1052.04	-0.00602534	0.0667682	0.281205	0.998972
AP4S1	259.923	0.00297178	0.0664937	0.579735	0.998972
AP5B1	1633.45	-0.00514119	0.0667123	0.39123	0.998972
AP5M1	2679.61	0.00493906	0.0666494	0.38136	0.998972
AP5S1	558.303	0.0059299	0.0666328	0.399564	0.998972
AP5Z1	2742.04	-0.00356848	0.0664859	0.541667	0.998972
APAF1	2934.64	0.00200538	0.0663434	0.760053	0.998972
APBA1	641.537	-0.00120586	0.0665428	0.707931	0.998972
APBA2	1111.73	-0.000393635	0.0664792	0.944697	0.998972
APBA3	1286.76	-0.011149	0.0675109	0.158822	0.993188
APBB1	1074.55	-0.0017013	0.066509	0.675898	0.998972
APBB1IP	2119.42	-0.000919706	0.0665171	0.791436	0.998972
APBB2	7705.74	0.00546628	0.066856	0.134388	0.985899
APBB3	1242.71	0.00342558	0.0664549	0.581981	0.998972
APC	55347.9	0.0106412	0.0675058	0.137728	0.985899
APC2	102.324	0.000982026	0.0665852	0.657266	0.998972
APCDD1	1368.86	0.0021005	0.0666059	0.451208	0.998972
APCDD1L	206.27	-3.35371	1.3254	0.000231131	0.0907805
APCS	3086.03	-8.92592e-05	0.0666069	0.93611	0.998972
APEH	4749.76	0.00445973	0.0665961	0.433002	0.998972
APEX1	7368.85	0.00154073	0.0664965	0.730909	0.998972
APEX2	1972.97	0.00372996	0.0665117	0.525725	0.998972
APH1A	5685.4	-0.00480687	0.066655	0.362806	0.998972
APH1B	625.122	-0.000683217	0.0663751	0.914904	0.998972
API5	6250.61	0.00302067	0.0665286	0.548779	0.998972
APIP	1910.67	0.00413836	0.0665799	0.451436	0.998972
APLF	580.549	-0.0050955	0.0668144	0.14796	0.988237
APLN	160.328	0.0028729	0.0666452	0.316743	0.998972
APLNR	1029.68	-0.000331879	0.0663949	0.943195	0.998972
APLP1	598.169	0.000459591	0.0665825	0.823464	0.998972
APLP2	21033.9	-0.00967078	0.06753	0.0308042	0.716587
APMAP	4630.82	0.00188343	0.0664621	0.7133	0.998972
APOA1	13251.5	7.923e-05	0.0665934	0.933122	0.998972
APOA1BP	3028.54	-0.00484019	0.0666453	0.37371	0.998972
APOA2	8827.52	-8.56872e-05	0.0666059	0.900803	0.998972
APOA4	355.824	-8.83127e-05	0.0666071	0.943448	0.998972
APOA5	1613.09	-8.54169e-05	0.0666064	0.922369	0.998972
APOB	154684	-0.000979129	0.0666086	0.444483	0.998972
APOBEC2	19.766	-2.64553e-05	0.0666064	0.91454	0.998972
APOBEC3A	107.263	0.000471302	0.0665758	0.785199	0.998972
APOBEC3B	2529.35	-0.00200863	0.0664948	0.650594	0.998972
APOBEC3C	883.458	-0.0020472	0.0665929	0.475556	0.998972
APOBEC3D	972.4	-0.00111228	0.0665701	0.659798	0.998972
APOBEC3F	1603.9	-0.000534539	0.0665334	0.853657	0.998972
APOBEC3G	978.146	-0.00233582	0.0666086	0.414431	0.998972
APOBEC3H	53.5018	-0.00168095	0.0665969	0.481952	0.998972
APOBR	964.649	0.00647903	0.0670254	0.0356903	0.759036
APOC1	7913.48	-8.54304e-05	0.0665624	0.96218	0.998972
APOC1P1	183.938	0.00171439	0.0666251	0.270711	0.998972
APOC3	10868.8	-8.52e-05	0.0666068	0.930378	0.998972
APOE	19203.3	0.000244024	0.0664355	0.969172	0.998972
APOF	651.664	0.000657411	0.0666119	0.111502	0.962688
APOH	15917.1	-6.8891e-05	0.0666067	0.934516	0.998972
APOL1	2456.09	-0.00224281	0.0665247	0.596685	0.998972
APOL2	3102.88	-0.000803531	0.0664086	0.869107	0.998972
APOL3	1452	-0.000709702	0.0665152	0.833462	0.998972
APOL4	566.41	-0.00288181	0.0666623	0.231225	0.998972
APOL5	8.16091	-0.00266465	0.0666786	0.0395004	0.784333
APOL6	2010.02	-0.00150224	0.0665817	0.559253	0.998972
APOLD1	350.051	-0.00418338	0.0666262	0.393646	0.998972
APOM	301.049	-2.43612e-05	0.0665684	0.989757	0.998972
APOO	575.601	-0.00848191	0.0671757	0.139366	0.985899
APOOL	1541.08	0.00326074	0.0665328	0.528983	0.998972
APOPT1	1299.19	0.00210229	0.0663287	0.755004	0.998972
APP	31244.8	-0.00543399	0.0668226	0.178584	0.998972
APPBP2	3412.17	0.00131933	0.0664722	0.78022	0.998972
APPL1	5297.15	0.00939269	0.0671267	0.23707	0.998972
APPL2	2384.3	0.00282195	0.0665186	0.570711	0.998972
APRT	1478.38	-0.00170446	0.0664661	0.673633	0.998972
APTR	40.4526	-0.00304541	0.0664932	0.542279	0.998972
APTX	1381.72	-0.0111606	0.0673902	0.21501	0.998972
AQP1	2786.44	0.00446298	0.0667068	0.289897	0.998972
AQP11	213.625	0.00171849	0.0665893	0.52657	0.998972
AQP3	4249.23	0.00044573	0.0665807	0.845843	0.998972
AQP4	5.98733	-0.000727044	0.0666102	0.364105	0.998972
AQP5	989.117	-0.000290354	0.0666061	0.584862	0.998972
AQP6	29.0203	0.000776956	0.0666048	0.508728	0.998972
AQP7	234.793	-0.0042346	0.0667991	0.0102529	0.491605
AQP9	775.417	-0.00158591	0.0666163	0.36197	0.998972
AQPEP	64.2927	-0.0158387	0.0692956	0.00241078	0.275073
AQR	5544.32	0.0177615	0.0695744	0.0496522	0.843245
AR	26676.8	0.00146561	0.0666281	0.139435	0.985899
ARAF	29344.5	0.000836598	0.0664442	0.871967	0.998972
ARAP1	11609.9	-0.000656339	0.065806	0.944029	0.998972
ARAP2	4112.63	-0.00556967	0.0667318	0.353354	0.998972
ARAP3	2313.17	-0.010723	0.0676015	0.110708	0.961221
ARC	40.8515	0.00152221	0.0666165	0.356401	0.998972
ARCN1	7251.52	-0.00225443	0.0663954	0.697925	0.998972
AREGB	28.9746	0.00238358	0.0666579	0.0884	0.938954
AREL1	3090.48	0.00826699	0.0668653	0.315078	0.998972
ARF1	14242.6	0.00273303	0.0663648	0.68521	0.998972
ARF3	3341.21	0.0108993	0.0676273	0.100675	0.95349
ARF4	6283.9	0.00213515	0.0663588	0.741879	0.998972
ARF5	3448.4	-0.00543177	0.0666902	0.342455	0.998972
ARF6	6807.99	0.00488223	0.0664772	0.505627	0.998972
ARFGAP1	4956.99	0.00696367	0.0669075	0.231419	0.998972
ARFGAP2	3157.86	0.0151194	0.0682512	0.166227	0.998972
ARFGAP3	3167.94	-0.00227871	0.0665355	0.576659	0.998972
ARFGEF1	26953.6	0.0122342	0.0681753	0.00745817	0.439601
ARFGEF2	13285.4	0.00298355	0.0664252	0.633726	0.998972
ARFIP1	2255.21	0.0114126	0.0676076	0.148844	0.990025
ARFIP2	2325.73	0.00384335	0.0667083	0.223268	0.998972
ARFRP1	3087.23	0.00343013	0.0665054	0.498282	0.998972
ARG1	2069.42	-0.00118093	0.0666175	0.278168	0.998972
ARG2	215.307	-0.00373713	0.066592	0.465045	0.998972
ARGLU1	5125.57	-0.000515757	0.0664067	0.91229	0.998972
ARHGAP1	5873.64	0.00845857	0.0671309	0.17442	0.998972
ARHGAP10	2470.28	0.00336352	0.0665053	0.549229	0.998972
ARHGAP11A	3116.71	0.000996953	0.066543	0.770122	0.998972
ARHGAP11B	1006.01	-0.00547089	0.0668514	0.134686	0.985899
ARHGAP12	6287.19	-0.00813463	0.0671344	0.136054	0.985899
ARHGAP15	1223.52	-0.00206094	0.0665886	0.488935	0.998972
ARHGAP17	4704.82	-0.0041541	0.0663826	0.57008	0.998972
ARHGAP18	3920.61	-0.000635273	0.0665376	0.826529	0.998972
ARHGAP19	26.6681	0.00252367	0.0664968	0.611783	0.998972
ARHGAP20	215.278	0.00222693	0.0665428	0.610291	0.998972
ARHGAP21	18035.9	-0.00309102	0.0666196	0.385304	0.998972
ARHGAP22	858.234	-0.00382747	0.0666619	0.498051	0.998972
ARHGAP23	3708.72	0.00228	0.0663769	0.718474	0.998972
ARHGAP24	947.216	-0.00230108	0.0664354	0.66023	0.998972
ARHGAP25	1123.7	-0.00175484	0.0665582	0.594137	0.998972
ARHGAP26	3167.51	-0.00635229	0.06696	0.0998855	0.95349
ARHGAP27	2624.36	-0.00884275	0.067322	0.0885003	0.938954
ARHGAP28	612.206	0.000128778	0.0665092	0.982423	0.998972
ARHGAP29	12558	0.00225691	0.066527	0.61125	0.998972
ARHGAP30	3473.73	-0.00293172	0.0666057	0.418022	0.998972
ARHGAP31	3928.51	-0.00577534	0.0664526	0.482992	0.998972
ARHGAP32	8086.02	-0.00759799	0.0671609	0.0485308	0.841723
ARHGAP33	3340.24	0.0024008	0.0665773	0.515724	0.998972
ARHGAP35	20535.8	0.00485289	0.0668196	0.101137	0.95349
ARHGAP39	3847.79	0.00390304	0.0667244	0.182953	0.998972
ARHGAP4	3913.27	-0.000949451	0.066493	0.805035	0.998972
ARHGAP40	1209.75	0.000706346	0.0665978	0.68153	0.998972
ARHGAP42	1321.03	-0.00591855	0.0668296	0.221308	0.998972
ARHGAP44	872.119	-0.00224851	0.0665975	0.452877	0.998972
ARHGAP5	17831.5	0.00299841	0.0665707	0.496905	0.998972
ARHGAP6	427.697	-0.00248057	0.0665472	0.537227	0.998972
ARHGAP8	23.6329	0.00259445	0.0666126	0.350034	0.998972
ARHGAP9	1144.15	-0.00291492	0.0666549	0.269416	0.998972
ARHGDIA	13665	0.00175423	0.0663957	0.767443	0.998972
ARHGDIB	4153.64	0.000384199	0.0665066	0.930819	0.998972
ARHGDIG	90.2847	0.000387296	0.0665946	0.812977	0.998972
ARHGEF1	8649.33	-1.81315e-05	0.0663578	0.988738	0.998972
ARHGEF10	4662.8	-0.000611782	0.0664584	0.882053	0.998972
ARHGEF10L	5745.35	-0.00965723	0.067471	0.0618726	0.890082
ARHGEF11	8426.58	0.000542611	0.0663035	0.939882	0.998972
ARHGEF12	19672.2	0.00502984	0.0666821	0.351064	0.998972
ARHGEF15	1366.76	0.000335607	0.0664207	0.953903	0.998972
ARHGEF16	2248.87	-0.000329884	0.0665139	0.915284	0.998972
ARHGEF17	10592.2	0.00131712	0.0664402	0.800736	0.998972
ARHGEF18	4077.03	-0.00135628	0.0662886	0.832518	0.998972
ARHGEF19	1611.4	-0.00150385	0.0664029	0.778715	0.998972
ARHGEF2	9887.91	-0.00224835	0.0664093	0.690528	0.998972
ARHGEF25	1485.56	0.00260238	0.066565	0.510215	0.998972
ARHGEF26	2945.08	0.002089	0.0666087	0.434365	0.998972
ARHGEF28	2289.59	0.00573097	0.0667852	0.266798	0.998972
ARHGEF3	1724.82	-0.00509176	0.0666853	0.342725	0.998972
ARHGEF33	78.0316	-0.00274616	0.0665582	0.519709	0.998972
ARHGEF34P	1403.73	-0.00670586	0.067024	0.0689902	0.89597
ARHGEF35	763.453	-0.00678429	0.0670797	0.0185967	0.593935
ARHGEF37	1550.36	0.00237827	0.066624	0.375357	0.998972
ARHGEF39	402.401	-0.00117313	0.0665434	0.709761	0.998972
ARHGEF4	1004.8	-0.00459374	0.0668258	0.0220234	0.621546
ARHGEF40	5452.72	0.000894164	0.0665164	0.819242	0.998972
ARHGEF5	2619.15	-0.0062571	0.0669704	0.0702472	0.898658
ARHGEF6	3736.33	0.000860138	0.0665046	0.83503	0.998972
ARHGEF7	6450.56	-0.000386563	0.0662281	0.949266	0.998972
ARHGEF9	1691.28	-0.000189762	0.0664045	0.971452	0.998972
ARID1A	104664	0.0016479	0.0661342	0.84685	0.998972
ARID1B	16390	-0.00307253	0.0660591	0.73346	0.998972
[truncated: 17,540 more rows]

## Sheet: C1D1_CBR_DEgenes
Supplementary Table 15. The results of DE analysis between CBR responders and non-responders at C1D1 performed by DESeq2.
[truncated: 21,110 more rows]
